# Supplementary material for: The Tomato Hybrid Proline-rich Protein regulates the abscission zone competence to respond to ethylene signals
Source: PubMed Central journal article supplement (PMC5981600; doi:10.1038/s41438-018-0033-2), 2018-06-01
Supplement: 41438_2018_33_MOESM2_ESM.pdf [file 41438_2018_33_MOESM2_ESM.pdf]

Table S2. Differentially regulated genes (up and down regulated) in the control compared with THyPRP silenced plants in FAZ at 0 h along with their expression values, fold changes, annotations, GO ids and terms.

Worksheet 2 & 3

Samples

| Set1                 |                  |          |      |          |
|----------------------|------------------|----------|------|----------|
| Line                 | Array            | Details  | Time | Analysis |
| Control – New Yorker | 254331010025_1_1 | 0h_1_AZ  | 0h   | Control  |
| Control – New Yorker | 254331010025_1_2 | 0h_2_AZ  | 0h   |          |
| TAPG + TPRP          | 254331010034_1_1 | 0h_37_AZ | 0h   | Treated  |
| TAPG + TPRP          | 254331010034_1_2 | 0h_38_AZ | 0h   |          |

Note:

Fold change expression values are provided as logbase 2

Flagging Criteria:

Compromised: If the gProcessedSignal value is less than the background intensity

Detected: If the gProcessedSignal value is above background intensity

| Column Header   | Description                                                     |
|-----------------|-----------------------------------------------------------------|
| ProbeName       | Unique probe identifier                                         |
| GeneName        | GeneSymbol                                                      |
| Fold            | Fold change calculated is log base 2                            |
| Flag            | Detected or Compromised                                         |
| GeomeanFold     | Average Fold change for the replicates calculated is log base 2 |
| p-Value         | t-test p- value                                                 |
| gProcessedSigna | Background subtracted signal intensity                          |

Worksheet 4 & 5

This file contains the fold change for all the spots in the array

GO ID

Gene Ontology ID

GO ACCESSION

Gene Ontology Function name

p-value :

The probability of obtaining the specified GO accession number from a list of random entities. Less the p-value more significant is the GO accession number.

Significant pvalue<0.05

Count in Selection :

This refers to the number of genes in the selected entity (for example, from T-test) list which have that particular GO term.

%Count in Selection :

This refers to the percentage of genes in the input entity list which have that GO term.

Count in Total :

This refers to the number of genes in All Entities which have that GO term.

%Count in Total :

This refers to the percentage of genes in the All Entities list which have that GO term.

Cut off used to filter up and down regulated genes

Upregulated

For filtering upregulation we consider flag should be Detected in the treated sample and can be Compromised or Detected in the control sample and fold>=0.8 in the individual replicates and fold>=1 in the Geomean of treated samples.

Downregulated

For filtering downregulation we consider flag can be Detected or Compromised in the treated sample and should be Detected in the control sample and fold<=-0.8 in the individual replicates and fold<=-1 in the Geomean of treated samples.

Differentially Regulated Probes

| Sample                                 | Up   | Down |
|----------------------------------------|------|------|
| 0h_TPRP_AZ vs. 0h_Control_AZ_Sense     | 1208 | 416  |
| 0h_TPRP_AZ vs. 0h_Control_AZ_Antisense | 862  | 216  |





























| GO ID | GO ACCESSION          | GO Term                              | p-value | Count in Selection | Count in Selecti | Count in Total | % Count in Total |
|-------|-----------------------|--------------------------------------|---------|--------------------|------------------|----------------|------------------|
| 4459  | GO:0006259 GO:0055132 | DNA metabolic process                | 0.00    | 41                 | 11.357341        | 493            | 1.4237444        |
| 4476  | GO:0006278            | RNA-dependent DNA replication        | 0.00    | 27                 | 7.479224         | 166            | 0.4793947        |
| 4460  | GO:0006260 GO:0055133 | DNA replication                      | 0.00    | 27                 | 7.479224         | 224            | 0.64689404       |
| 8493  | GO:0015074            | DNA integration                      | 0.00    | 14                 | 3.8781164        | 47             | 0.13573223       |
| 31895 | GO:0090304            | nucleic acid metabolic process       | 0.00    | 50                 | 13.850415        | 2340           | 6.7577324        |
| 19473 | GO:0043170 GO:0043283 | macromolecule metabolic process      | 0.00    | 105                | 29.085873        | 6553           | 18.92454         |
| 20510 | GO:0044260 GO:0034960 | cellular macromolecule metabolic p   | 0.00    | 87                 | 24.099724        | 5577           | 16.105928        |
| 4357  | GO:0006139 GO:0055134 | nucleobase, nucleoside, nucleotide   | 0.00    | 57                 | 15.789474        | 3285           | 9.486816         |
| 7074  | GO:0009815            | 1-aminocyclopropane-1-carboxylat     | 0.00    | 5                  | 1.3850416        | 49             | 0.14150807       |
| 9722  | GO:0016641            | oxidoreductase activity, acting on t | 0.00    | 5                  | 1.3850416        | 69             | 0.19926646       |
| 17024 | GO:0034645 GO:0034961 | cellular macromolecule biosynthesi   | 0.00    | 36                 | 9.9723           | 1999           | 5.7729516        |
| 6428  | GO:0009059 GO:0043284 | macromolecule biosynthetic proces    | 0.00    | 36                 | 9.9723           | 2003           | 5.7845035        |
| 20488 | GO:0044238            | primary metabolic process            | 0.00    | 122                | 33.795013        | 9167           | 26.47356         |
| 17020 | GO:0034641            | cellular nitrogen compound metabo    | 0.00    | 57                 | 15.789474        | 3678           | 10.621769        |
| 4906  | GO:0006807            | nitrogen compound metabolic proc     | 0.00    | 57                 | 15.789474        | 3725           | 10.757502        |
| 9719  | GO:0016638            | oxidoreductase activity, acting on t | 0.00    | 5                  | 1.3850416        | 89             | 0.25702485       |
| 5791  | GO:0008270            | zinc ion binding                     | 0.00    | 33                 | 9.141274         | 1880           | 5.4292893        |
| 22415 | GO:0046914            | transition metal ion binding         | 0.01    | 41                 | 11.357341        | 2599           | 7.5057034        |
| 31431 | GO:0080054            | low affinity nitrate transmembrane t | 0.01    | 3                  | 0.83102494       | 45             | 0.1299564        |
| 4641  | GO:0006508            | proteolysis                          | 0.01    | 18                 | 4.98615          | 965            | 2.7868426        |
| 21331 | GO:0045735            | nutrient reservoir activity          | 0.01    | 4                  | 1.1080333        | 89             | 0.25702485       |
| 2986  | GO:0004252            | serine-type endopeptidase activity   | 0.02    | 5                  | 1.3850416        | 144            | 0.41586044       |
| 2975  | GO:0004175 GO:0016809 | endopeptidase activity               | 0.02    | 8                  | 2.2160666        | 320            | 0.9241344        |
| 5907  | GO:0008413            | 8-oxo-7,8-dihydroguanosine triphos   | 0.02    | 1                  | 0.27700832       | 2              | 0.00577584       |
| 11186 | GO:0019177            | dihydroneopterin triphosphate pyr    | 0.02    | 1                  | 0.27700832       | 2              | 0.00577584       |
| 5636  | GO:0008061            | chitin binding                       | 0.02    | 2                  | 0.55401665       | 23             | 0.06642216       |
| 8526  | GO:0015112            | nitrate transmembrane transporter    | 0.03    | 3                  | 0.83102494       | 61             | 0.1761631        |
| 8975  | GO:0015706 GO:0006872 | nitrate transport                    | 0.03    | 3                  | 0.83102494       | 61             | 0.1761631        |
| 9876  | GO:0016837            | carbon-oxygen lyase activity, actin  | 0.03    | 2                  | 0.55401665       | 25             | 0.072197996      |
| 13054 | GO:0030570            | pectate lyase activity               | 0.03    | 2                  | 0.55401665       | 25             | 0.072197996      |
| 22375 | GO:0046872            | metal ion binding                    | 0.03    | 42                 | 11.634349        | 2985           | 8.6204405        |
| 19470 | GO:0043167            | ion binding                          | 0.03    | 42                 | 11.634349        | 2997           | 8.655096         |
| 19472 | GO:0043169            | cation binding                       | 0.03    | 42                 | 11.634349        | 2997           | 8.655096         |
| 4990  | GO:0006915 GO:0008632 | apoptosis                            | 0.03    | 6                  | 1.6620499        | 227            | 0.6555578        |
| 3307  | GO:0004675            | transmembrane receptor protein se    | 0.04    | 8                  | 2.2160666        | 367            | 1.0598665        |
| 5756  | GO:0008219            | cell death                           | 0.04    | 6                  | 1.6620499        | 239            | 0.69021285       |
| 8209  | GO:0012501 GO:0016244 | programmed cell death                | 0.04    | 6                  | 1.6620499        | 239            | 0.69021285       |
| 9462  | GO:0016265            | death                                | 0.04    | 6                  | 1.6620499        | 239            | 0.69021285       |
| 2710  | GO:0003860            | 3-hydroxyisobutyryl-CoA hydrolase    | 0.04    | 1                  | 0.27700832       | 4              | 0.011551679      |
| 3717  | GO:0005199            | structural constituent of cell wall  | 0.04    | 2                  | 0.55401665       | 32             | 0.09241343       |
| 11522 | GO:0019538 GO:0006411 | protein metabolic process            | 0.05    | 54                 | 14.958448        | 4134           | 11.938661        |
| 12806 | GO:0030247            | polysaccharide binding               | 0.05    | 2                  | 0.55401665       | 35             | 0.10107719       |
| 1169  | GO:0001871            | pattern binding                      | 0.05    | 2                  | 0.55401665       | 35             | 0.10107719       |
| 20499 | GO:0044249            | cellular biosynthetic process        | 0.06    | 36                 | 9.9723           | 2635           | 7.6096687        |
| 2713  | GO:0003863            | 3-methyl-2-oxobutanoate dehydro      | 0.06    | 1                  | 0.27700832       | 6              | 0.01732752       |
| 3073  | GO:0004397            | histidine ammonia-lyase activity     | 0.06    | 1                  | 0.27700832       | 6              | 0.01732752       |
| 5810  | GO:0008290            | F-actin capping protein complex      | 0.06    | 1                  | 0.27700832       | 6              | 0.01732752       |
| 14264 | GO:0031849            | olfactory receptor binding           | 0.06    | 1                  | 0.27700832       | 6              | 0.01732752       |
| 5891  | GO:0008395 GO:0008394 | steroid hydroxylase activity         | 0.07    | 2                  | 0.55401665       | 40             | 0.1155168        |
| 20487 | GO:0044237            | cellular metabolic process           | 0.07    | 98                 | 27.146814        | 8185           | 23.637625        |
| 21149 | GO:0045548            | phenylalanine ammonia-lyase activ    | 0.07    | 1                  | 0.27700832       | 7              | 0.020215439      |
| 8461  | GO:0015020 GO:0003981 | glucuronosyltransferase activity     | 0.07    | 2                  | 0.55401665       | 42             | 0.121292636      |
| 13884 | GO:0031461            | cullin-RING ubiquitin ligase comple  | 0.07    | 2                  | 0.55401665       | 42             | 0.121292636      |
| 5766  | GO:0008236            | serine-type peptidase activity       | 0.07    | 5                  | 1.3850416        | 214            | 0.6180149        |
| 6427  | GO:0009058            | biosynthetic process                 | 0.08    | 37                 | 10.249308        | 2796           | 8.074624         |
| 10103 | GO:0017171            | serine hydrolase activity            | 0.08    | 5                  | 1.3850416        | 220            | 0.63534236       |
| 4612  | GO:0006468            | protein phosphorylation              | 0.08    | 30                 | 8.310249         | 2205           | 6.367863         |
| 11202 | GO:0019199            | transmembrane receptor protein ki    | 0.08    | 9                  | 2.493075         | 504            | 1.4555116        |
| 7225  | GO:0009978            | allene oxide synthase activity       | 0.09    | 1                  | 0.27700832       | 9              | 0.025991278      |
| 7506  | GO:0010279            | indole-3-acetic acid amido synthet   | 0.09    | 1                  | 0.27700832       | 9              | 0.025991278      |
| 19342 | GO:0043027            | caspase inhibitor activity           | 0.09    | 1                  | 0.27700832       | 9              | 0.025991278      |
| 19343 | GO:0043028            | caspase regulator activity           | 0.09    | 1                  | 0.27700832       | 9              | 0.025991278      |
| 19458 | GO:0043154 GO:0001719 | negative regulation of caspase act   | 0.09    | 1                  | 0.27700832       | 9              | 0.025991278      |
| 19579 | GO:0043281 GO:0043026 | regulation of caspase activity       | 0.09    | 1                  | 0.27700832       | 9              | 0.025991278      |
| 3476  | GO:0004872 GO:0019041 | receptor activity                    | 0.10    | 11                 | 3.0470915        | 672            | 1.9406822        |
| 983   | GO:0001664            | G-protein-coupled receptor binding   | 0.10    | 1                  | 0.27700832       | 10             | 0.0288792        |
| 3156  | GO:0004497            | monooxygenase activity               | 0.11    | 4                  | 1.1080333        | 172            | 0.49672222       |
| 7690  | GO:0010466            | negative regulation of peptidase ac  | 0.11    | 3                  | 0.83102494       | 110            | 0.31767118       |
| 12946 | GO:0030414            | peptidase inhibitor activity         | 0.11    | 3                  | 0.83102494       | 110            | 0.31767118       |
| 25636 | GO:0051346            | negative regulation of hydrolase ac  | 0.11    | 3                  | 0.83102494       | 110            | 0.31767118       |
| 6013  | GO:0008553            | hydrogen-exporting ATPase activit    | 0.11    | 1                  | 0.27700832       | 11             | 0.03176712       |
| 5702  | GO:0008146            | sulfotransferase activity            | 0.11    | 2                  | 0.55401665       | 54             | 0.15594767       |
| 9768  | GO:0016706            | oxidoreductase activity, acting on p | 0.11    | 4                  | 1.1080333        | 175            | 0.505386         |
| 26711 | GO:0052547            | regulation of peptidase activity     | 0.11    | 3                  | 0.83102494       | 112            | 0.32344702       |
| 28100 | GO:0061134            | peptidase regulator activity         | 0.11    | 3                  | 0.83102494       | 112            | 0.32344702       |
| 6946  | GO:0009678            | hydrogen-translocating pyrophosph    | 0.12    | 1                  | 0.27700832       | 12             | 0.03465504       |
| 7526  | GO:0010301 GO:0033710 | xanthoxin dehydrogenase activity     | 0.12    | 1                  | 0.27700832       | 12             | 0.03465504       |
| 3475  | GO:0004871 GO:0005062 | signal transducer activity           | 0.12    | 12                 | 3.3240998        | 787            | 2.2727928        |
| 27063 | GO:0060089            | molecular transducer activity        | 0.12    | 12                 | 3.3240998        | 787            | 2.2727928        |
| 24966 | GO:0005060            | flavin adenine dinucleotide binding  | 0.13    | 3                  | 0.83102494       | 118            | 0.34077454       |
| 30700 | GO:0072341            | modified amino acid binding          | 0.13    | 2                  | 0.55401665       | 59             | 0.17038727       |
| 7229  | GO:0009987 GO:0008151 | cellular process                     | 0.13    | 121                | 33.518005        | 10601          | 30.614838        |
| 8149  | GO:0010941            | regulation of cell death             | 0.13    | 1                  | 0.27700832       | 13             | 0.037542958      |
| 19298 | GO:0042981            | regulation of apoptosis              | 0.13    | 1                  | 0.27700832       | 13             | 0.037542958      |
| 19381 | GO:0043067 GO:0043070 | regulation of programmed cell deat   | 0.13    | 1                  | 0.27700832       | 13             | 0.037542958      |
| 6884  | GO:0009607            | response to biotic stimulus          | 0.14    | 3                  | 0.83102494       | 122            | 0.3523262        |
| 8553  | GO:0015140            | malate transmembrane transporter     | 0.14    | 1                  | 0.27700832       | 14             | 0.040430877      |
| 8859  | GO:0015556            | C4-dicarboxylate transmembrane t     | 0.14    | 1                  | 0.27700832       | 14             | 0.040430877      |
| 9009  | GO:0015740            | C4-dicarboxylate transport           | 0.14    | 1                  | 0.27700832       | 14             | 0.040430877      |
| 9012  | GO:0015743            | malate transport                     | 0.14    | 1                  | 0.27700832       | 14             | 0.040430877      |
| 9879  | GO:0016841            | ammonia-lyase activity               | 0.14    | 1                  | 0.27700832       | 14             | 0.040430877      |
| 29787 | GO:0071423            | malate transmembrane transport       | 0.14    | 1                  | 0.27700832       | 14             | 0.040430877      |
| 31408 | GO:0080031            | methyl salicylate esterase activity  | 0.14    | 1                  | 0.27700832       | 14             | 0.040430877      |
| 3490  | GO:0004888 GO:0004926 | transmembrane receptor activity      | 0.15    | 9                  | 2.493075         | 571            | 1.6490022        |
| 3306  | GO:0004674 GO:0004695 | protein serine/threonine kinase act  | 0.15    | 15                 | 4.1551247        | 1062           | 3.0669708        |



|       |                       |                                                                 |      |     |            |       |             |
|-------|-----------------------|-----------------------------------------------------------------|------|-----|------------|-------|-------------|
| 3473  | GO:0004867            | serine-type endopeptidase inhibitor                             | 0.15 | 2   | 0.55401665 | 66    | 0.1906027   |
| 3742  | GO:0005242            | inward rectifier potassium channel                              | 0.15 | 1   | 0.27700832 | 16    | 0.046206716 |
| 3782  | GO:0005310 GO:0005312 | dicarboxylic acid transmembrane transporter                     | 0.15 | 1   | 0.27700832 | 16    | 0.046206716 |
| 4928  | GO:0006835 GO:0006841 | dicarboxylic acid transport                                     | 0.15 | 1   | 0.27700832 | 16    | 0.046206716 |
| 9386  | GO:0016157            | sucrose synthase activity                                       | 0.15 | 1   | 0.27700832 | 16    | 0.046206716 |
| 9878  | GO:0016840            | carbon-nitrogen lyase activity                                  | 0.15 | 1   | 0.27700832 | 16    | 0.046206716 |
| 18955 | GO:0042625            | ATPase activity, coupled to transmembrane transport             | 0.16 | 2   | 0.55401665 | 68    | 0.19637854  |
| 9874  | GO:0016835            | carbon-oxygen lyase activity                                    | 0.16 | 4   | 1.1080333  | 202   | 0.5833598   |
| 3801  | GO:0005342            | organic acid transmembrane transporter                          | 0.17 | 3   | 0.83102494 | 136   | 0.3927571   |
| 22444 | GO:0046943            | carboxylic acid transmembrane transporter                       | 0.17 | 3   | 0.83102494 | 136   | 0.3927571   |
| 4225  | GO:0005985            | sucrose metabolic process                                       | 0.17 | 1   | 0.27700832 | 18    | 0.051982556 |
| 12887 | GO:0030332            | cyclin binding                                                  | 0.17 | 1   | 0.27700832 | 18    | 0.051982556 |
| 22917 | GO:0047429            | nucleoside-triphosphate diphosphatase activity                  | 0.17 | 1   | 0.27700832 | 18    | 0.051982556 |
| 9832  | GO:0016782            | transferase activity, transferring sulfur                       | 0.18 | 2   | 0.55401665 | 74    | 0.21370606  |
| 2895  | GO:0004089            | carbonate dehydratase activity                                  | 0.18 | 1   | 0.27700832 | 19    | 0.054870475 |
| 9493  | GO:0016310            | phosphorylation                                                 | 0.18 | 31  | 8.587257   | 2504  | 7.2313514   |
| 4609  | GO:0006464            | protein modification process                                    | 0.19 | 34  | 9.4182825  | 2781  | 8.031305    |
| 6201  | GO:0008794            | arsenate reductase (glutaredoxin) activity                      | 0.19 | 1   | 0.27700832 | 20    | 0.0577584   |
| 9707  | GO:0016624            | oxidoreductase activity, acting on tetravalent inorganic anions | 0.19 | 1   | 0.27700832 | 20    | 0.0577584   |
| 9784  | GO:0016723            | oxidoreductase activity, oxidizing nitrogen                     | 0.19 | 1   | 0.27700832 | 20    | 0.0577584   |
| 13086 | GO:0030611            | arsenate reductase activity                                     | 0.19 | 1   | 0.27700832 | 20    | 0.0577584   |
| 13088 | GO:0030613            | oxidoreductase activity, acting on divalent inorganic anions    | 0.19 | 1   | 0.27700832 | 20    | 0.0577584   |
| 13089 | GO:0030614            | oxidoreductase activity, acting on monovalent inorganic anions  | 0.19 | 1   | 0.27700832 | 20    | 0.0577584   |
| 225   | GO:0000293            | ferric-chelate reductase activity                               | 0.19 | 1   | 0.27700832 | 20    | 0.0577584   |
| 3474  | GO:0004869 GO:0004870 | cysteine-type endopeptidase inhibitor                           | 0.20 | 1   | 0.27700832 | 21    | 0.060646318 |
| 5019  | GO:0006952 GO:0002217 | defense response                                                | 0.20 | 4   | 1.1080333  | 221   | 0.63823026  |
| 28378 | GO:0070011            | peptidase activity, acting on L-amino acids                     | 0.20 | 8   | 2.2160666  | 537   | 1.550813    |
| 9682  | GO:0016597            | amino acid binding                                              | 0.20 | 2   | 0.55401665 | 80    | 0.2310336   |
| 9875  | GO:0016836            | hydro-lyase activity                                            | 0.20 | 2   | 0.55401665 | 80    | 0.2310336   |
| 19479 | GO:0043176            | amine binding                                                   | 0.20 | 2   | 0.55401665 | 80    | 0.2310336   |
| 12660 | GO:0030077            | plasma membrane light-harvesting complex                        | 0.21 | 1   | 0.27700832 | 22    | 0.06353424  |
| 13038 | GO:0030551            | cyclic nucleotide binding                                       | 0.21 | 1   | 0.27700832 | 22    | 0.06353424  |
| 19040 | GO:0042716            | plasma membrane-derived chromatin                               | 0.21 | 1   | 0.27700832 | 22    | 0.06353424  |
| 3827  | GO:0005372            | water transmembrane transporter activity                        | 0.21 | 2   | 0.55401665 | 81    | 0.23392151  |
| 4927  | GO:0006833            | water transport                                                 | 0.21 | 2   | 0.55401665 | 81    | 0.23392151  |
| 8652  | GO:0015250            | water channel activity                                          | 0.21 | 2   | 0.55401665 | 81    | 0.23392151  |
| 18429 | GO:0042044            | fluid transport                                                 | 0.21 | 2   | 0.55401665 | 81    | 0.23392151  |
| 7527  | GO:0010302            | 2-oxoglutarate-dependent dioxygenase activity                   | 0.21 | 1   | 0.27700832 | 23    | 0.06642216  |
| 8517  | GO:0015103            | inorganic anion transmembrane transporter                       | 0.22 | 3   | 0.83102494 | 154   | 0.44473964  |
| 11931 | GO:0020037            | heme binding                                                    | 0.22 | 8   | 2.2160666  | 550   | 1.5883559   |
| 3213  | GO:0004568            | chitinase activity                                              | 0.22 | 1   | 0.27700832 | 24    | 0.06931008  |
| 6248  | GO:0008843            | endochitinase activity                                          | 0.22 | 1   | 0.27700832 | 24    | 0.06931008  |
| 31407 | GO:0080030            | methyl indole-3-acetate esterase activity                       | 0.22 | 1   | 0.27700832 | 24    | 0.06931008  |
| 9114  | GO:0015849            | organic acid transport                                          | 0.22 | 3   | 0.83102494 | 156   | 0.45051548  |
| 22443 | GO:0046942            | carboxylic acid transport                                       | 0.22 | 3   | 0.83102494 | 156   | 0.45051548  |
| 3464  | GO:0004857            | enzyme inhibitor activity                                       | 0.23 | 3   | 0.83102494 | 157   | 0.4534034   |
| 22459 | GO:0046961            | proton-transporting ATPase activity                             | 0.23 | 1   | 0.27700832 | 25    | 0.072197996 |
| 31493 | GO:0080118            | brassinosteroid sulfotransferase activity                       | 0.23 | 1   | 0.27700832 | 25    | 0.072197996 |
| 119   | GO:0000151            | ubiquitin ligase complex                                        | 0.23 | 2   | 0.55401665 | 88    | 0.25413695  |
| 8496  | GO:0015078            | hydrogen ion transmembrane transporter                          | 0.23 | 3   | 0.83102494 | 160   | 0.4620672   |
| 3872  | GO:0005506            | iron ion binding                                                | 0.24 | 8   | 2.2160666  | 563   | 1.6258988   |
| 3210  | GO:0004565            | beta-galactosidase activity                                     | 0.24 | 1   | 0.27700832 | 26    | 0.075085916 |
| 3896  | GO:0005544            | calcium-dependent phospholipid binding                          | 0.24 | 1   | 0.27700832 | 26    | 0.075085916 |
| 5763  | GO:0008233            | peptidase activity                                              | 0.24 | 8   | 2.2160666  | 565   | 1.6316746   |
| 2982  | GO:0004197            | cysteine-type endopeptidase activity                            | 0.24 | 2   | 0.55401665 | 90    | 0.2599128   |
| 9869  | GO:0016829            | lyase activity                                                  | 0.25 | 7   | 1.9390582  | 488   | 1.4093049   |
| 13144 | GO:0030674            | protein binding, bridging                                       | 0.25 | 1   | 0.27700832 | 28    | 0.080861755 |
| 13634 | GO:0031177            | phosphopantetheine binding                                      | 0.25 | 1   | 0.27700832 | 28    | 0.080861755 |
| 27064 | GO:0060090            | binding, bridging                                               | 0.25 | 1   | 0.27700832 | 28    | 0.080861755 |
| 3472  | GO:0004866            | endopeptidase inhibitor activity                                | 0.26 | 2   | 0.55401665 | 95    | 0.27435237  |
| 8159  | GO:0010951            | negative regulation of endopeptidase activity                   | 0.26 | 2   | 0.55401665 | 95    | 0.27435237  |
| 26712 | GO:0052548            | regulation of endopeptidase activity                            | 0.26 | 2   | 0.55401665 | 95    | 0.27435237  |
| 28101 | GO:0061135            | endopeptidase regulator activity                                | 0.26 | 2   | 0.55401665 | 95    | 0.27435237  |
| 19684 | GO:0043412            | macromolecule modification                                      | 0.26 | 34  | 9.4182825  | 2900  | 8.374968    |
| 12805 | GO:0030246            | carbohydrate binding                                            | 0.27 | 4   | 1.1080333  | 251   | 0.7248679   |
| 2774  | GO:0003950            | NAD+ ADP-ribosyltransferase activity                            | 0.27 | 1   | 0.27700832 | 30    | 0.086637594 |
| 6216  | GO:0008810            | cellulase activity                                              | 0.27 | 1   | 0.27700832 | 30    | 0.086637594 |
| 5705  | GO:0008152            | metabolic process                                               | 0.27 | 188 | 52.07756   | 17432 | 50.34222    |
| 13829 | GO:0031406            | carboxylic acid binding                                         | 0.27 | 2   | 0.55401665 | 98    | 0.28301615  |
| 19590 | GO:0043295            | glutathione binding                                             | 0.28 | 1   | 0.27700832 | 31    | 0.08952551  |
| 8967  | GO:0015698            | inorganic anion transport                                       | 0.28 | 3   | 0.83102494 | 176   | 0.5082739   |
| 3904  | GO:0005576            | extracellular region                                            | 0.28 | 3   | 0.83102494 | 178   | 0.5140497   |
| 13082 | GO:0030599            | pectinesterase activity                                         | 0.28 | 3   | 0.83102494 | 178   | 0.5140497   |
| 22409 | GO:0046906            | tetrapyrrole binding                                            | 0.28 | 8   | 2.2160666  | 596   | 1.7212002   |
| 3265  | GO:0004630            | phospholipase D activity                                        | 0.29 | 1   | 0.27700832 | 32    | 0.09241343  |
| 20517 | GO:0044267            | cellular protein metabolic process                              | 0.29 | 37  | 10.249308  | 3225  | 9.313541    |
| 19253 | GO:0042936            | dipeptide transporter activity                                  | 0.30 | 2   | 0.55401665 | 105   | 0.3032316   |
| 19255 | GO:0042938            | dipeptide transport                                             | 0.30 | 2   | 0.55401665 | 105   | 0.3032316   |
| 3749  | GO:0005249            | voltage-gated potassium channel activity                        | 0.30 | 1   | 0.27700832 | 34    | 0.09818927  |
| 5195  | GO:0007165 GO:0023033 | signal transduction                                             | 0.30 | 12  | 3.3240998  | 961   | 2.775291    |
| 12602 | GO:0023052 GO:0023046 | signaling                                                       | 0.30 | 12  | 3.3240998  | 961   | 2.775291    |
| 9480  | GO:0016289            | CoA hydrolase activity                                          | 0.31 | 1   | 0.27700832 | 35    | 0.10107719  |
| 21146 | GO:0045544            | gibberellin 20-oxidase activity                                 | 0.31 | 1   | 0.27700832 | 35    | 0.10107719  |
| 22049 | GO:0046527            | glucosyltransferase activity                                    | 0.31 | 4   | 1.1080333  | 270   | 0.77973837  |
| 19393 | GO:0043086            | negative regulation of catalytic activity                       | 0.31 | 3   | 0.83102494 | 188   | 0.54292893  |
| 20342 | GO:0044092            | negative regulation of molecular function                       | 0.31 | 3   | 0.83102494 | 188   | 0.54292893  |
| 3804  | GO:0005345            | purine base transmembrane transporter                           | 0.31 | 1   | 0.27700832 | 36    | 0.10396511  |
| 4949  | GO:0006863 GO:0015852 | purine base transport                                           | 0.31 | 1   | 0.27700832 | 36    | 0.10396511  |
| 8739  | GO:0015385 GO:0015502 | sodium:hydrogen antiporter activity                             | 0.31 | 1   | 0.27700832 | 36    | 0.10396511  |
| 9185  | GO:0015925            | galactosidase activity                                          | 0.31 | 1   | 0.27700832 | 36    | 0.10396511  |
| 3304  | GO:0004672 GO:0050222 | protein kinase activity                                         | 0.32 | 16  | 4.432133   | 1333  | 3.8495972   |
| 24968 | GO:0050662            | coenzyme binding                                                | 0.32 | 3   | 0.83102494 | 191   | 0.5515927   |
| 3318  | GO:0004693 GO:0016537 | cyclin-dependent protein kinase activity                        | 0.32 | 1   | 0.27700832 | 37    | 0.10685303  |
| 3758  | GO:0005267            | potassium channel activity                                      | 0.32 | 1   | 0.27700832 | 37    | 0.10685303  |
| 8934  | GO:0015662            | ATPase activity, coupled to transmembrane transport             | 0.32 | 1   | 0.27700832 | 37    | 0.10685303  |
| 29918 | GO:0071554            | cell wall organization or biogenesis                            | 0.33 | 2   | 0.55401665 | 112   | 0.32344702  |
| 12538 | GO:0022843            | voltage-gated cation channel activity                           | 0.33 | 1   | 0.27700832 | 38    | 0.10974095  |
| 25626 | GO:0051336            | regulation of hydrolase activity                                | 0.34 | 3   | 0.83102494 | 196   | 0.5660323   |



|       |                       |                                        |      |     |            |       |             |
|-------|-----------------------|----------------------------------------|------|-----|------------|-------|-------------|
| 8613  | GO:0015205 GO:0015392 | nucleobase transmembrane transp        | 0.34 | 1   | 0.27700832 | 40    | 0.1155168   |
| 9116  | GO:0015851            | nucleobase transport                   | 0.34 | 1   | 0.27700832 | 40    | 0.1155168   |
| 8584  | GO:0015171 GO:0015359 | amino acid transmembrane transp        | 0.35 | 2   | 0.55401665 | 118   | 0.34077454  |
| 2521  | GO:0003333            | amino acid transmembrane transp        | 0.35 | 2   | 0.55401665 | 118   | 0.34077454  |
| 20627 | GO:0044433            | cytoplasmic vesicle part               | 0.35 | 1   | 0.27700832 | 41    | 0.118404716 |
| 30069 | GO:0071705            | nitrogen compound transport            | 0.35 | 3   | 0.83102494 | 202   | 0.5833598   |
| 12659 | GO:0030076            | light-harvesting complex               | 0.36 | 1   | 0.27700832 | 42    | 0.121292636 |
| 13833 | GO:0031410            | cytoplasmic vesicle                    | 0.36 | 1   | 0.27700832 | 43    | 0.124180555 |
| 14393 | GO:0031982            | vesicle                                | 0.36 | 1   | 0.27700832 | 43    | 0.124180555 |
| 4951  | GO:0006865 GO:0006866 | amino acid transport                   | 0.37 | 2   | 0.55401665 | 123   | 0.35521415  |
| 9753  | GO:0016682            | oxidoreductase activity, acting on c   | 0.37 | 1   | 0.27700832 | 44    | 0.12706847  |
| 409   | GO:0000502            | proteasome complex                     | 0.37 | 1   | 0.27700832 | 44    | 0.12706847  |
| 5692  | GO:0008134            | transcription factor binding           | 0.38 | 1   | 0.27700832 | 45    | 0.1299564   |
| 8666  | GO:0015276            | ligand-gated ion channel activity      | 0.38 | 1   | 0.27700832 | 45    | 0.1299564   |
| 11780 | GO:0019829            | cation-transporting ATPase activity    | 0.38 | 1   | 0.27700832 | 45    | 0.1299564   |
| 12530 | GO:0022834            | ligand-gated channel activity          | 0.38 | 1   | 0.27700832 | 45    | 0.1299564   |
| 18956 | GO:0042626            | ATPase activity, coupled to transm     | 0.38 | 3   | 0.83102494 | 211   | 0.6093511   |
| 3761  | GO:0005275 GO:0005279 | amine transmembrane transporter        | 0.38 | 2   | 0.55401665 | 126   | 0.3638779   |
| 9861  | GO:0016820            | hydrolase activity, acting on acid a   | 0.38 | 3   | 0.83102494 | 212   | 0.612239    |
| 11776 | GO:0019825            | oxygen binding                         | 0.38 | 5   | 1.3850416  | 389   | 1.1234008   |
| 8495  | GO:0015077            | monovalent inorganic cation transp     | 0.39 | 3   | 0.83102494 | 214   | 0.6180149   |
| 9913  | GO:0016881            | acid-amino acid ligase activity        | 0.39 | 5   | 1.3850416  | 391   | 1.1291766   |
| 4188  | GO:0005938            | cell cortex                            | 0.40 | 1   | 0.27700832 | 48    | 0.13862015  |
| 14591 | GO:0032183            | SUMO binding                           | 0.40 | 1   | 0.27700832 | 48    | 0.13862015  |
| 20642 | GO:0044448            | cell cortex part                       | 0.40 | 1   | 0.27700832 | 48    | 0.13862015  |
| 113   | GO:0000145            | exocyst                                | 0.40 | 1   | 0.27700832 | 48    | 0.13862015  |
| 17617 | GO:0035251            | UDP-glucosyltransferase activity       | 0.40 | 3   | 0.83102494 | 218   | 0.62956655  |
| 3756  | GO:0005261 GO:0015281 | cation channel activity                | 0.40 | 1   | 0.27700832 | 49    | 0.14150807  |
| 3844  | GO:0005451            | monovalent cation:hydrogen antip       | 0.40 | 1   | 0.27700832 | 49    | 0.14150807  |
| 31421 | GO:0080044            | quercetin 7-O-glucosyltransferase      | 0.40 | 1   | 0.27700832 | 49    | 0.14150807  |
| 12533 | GO:0022838            | substrate-specific channel activity    | 0.41 | 3   | 0.83102494 | 221   | 0.63823026  |
| 9845  | GO:0016798            | hydrolase activity, acting on glycos   | 0.41 | 5   | 1.3850416  | 401   | 1.1580559   |
| 5096  | GO:0007047            | cellular cell wall organization        | 0.41 | 1   | 0.27700832 | 50    | 0.14439599  |
| 6932  | GO:0009664            | plant-type cell wall organization      | 0.41 | 1   | 0.27700832 | 50    | 0.14439599  |
| 9783  | GO:0016722            | oxidoreductase activity, oxidizing n   | 0.41 | 1   | 0.27700832 | 50    | 0.14439599  |
| 20857 | GO:0045229            | external encapsulating structure or    | 0.41 | 1   | 0.27700832 | 50    | 0.14439599  |
| 30033 | GO:0071669            | plant-type cell wall organization or   | 0.41 | 1   | 0.27700832 | 50    | 0.14439599  |
| 30886 | GO:0072530            | purine-containing compound transp      | 0.41 | 1   | 0.27700832 | 50    | 0.14439599  |
| 9103  | GO:0015837            | amine transport                        | 0.41 | 2   | 0.55401665 | 135   | 0.38986918  |
| 8908  | GO:0015629            | actin cytoskeleton                     | 0.41 | 1   | 0.27700832 | 51    | 0.14728391  |
| 9975  | GO:0016998            | cell wall macromolecule catabolic p    | 0.41 | 1   | 0.27700832 | 51    | 0.14728391  |
| 4897  | GO:0006793            | phosphorus metabolic process           | 0.41 | 32  | 8.864266   | 2925  | 8.4471655   |
| 4900  | GO:0006796            | phosphate metabolic process            | 0.41 | 32  | 8.864266   | 2925  | 8.4471655   |
| 5704  | GO:0008150 GO:0000004 | biological process                     | 0.42 | 234 | 64.81995   | 22215 | 64.155136   |
| 8660  | GO:0015267 GO:0015249 | channel activity                       | 0.42 | 3   | 0.83102494 | 226   | 0.6526699   |
| 12515 | GO:0022803            | passive transmembrane transport        | 0.42 | 3   | 0.83102494 | 226   | 0.6526699   |
| 5097  | GO:0007049            | cell cycle                             | 0.42 | 1   | 0.27700832 | 52    | 0.15017183  |
| 20287 | GO:0044036            | cell wall macromolecule metabolic      | 0.42 | 1   | 0.27700832 | 52    | 0.15017183  |
| 9812  | GO:0016758            | transferase activity, transferring he  | 0.42 | 6   | 1.6620499  | 501   | 1.4468478   |
| 8607  | GO:0015197 GO:0015637 | peptide transporter activity           | 0.43 | 2   | 0.55401665 | 139   | 0.40142086  |
| 8608  | GO:0015198            | oligopeptide transporter activity      | 0.43 | 2   | 0.55401665 | 139   | 0.40142086  |
| 9750  | GO:0016679            | oxidoreductase activity, acting on d   | 0.43 | 1   | 0.27700832 | 53    | 0.15305975  |
| 29246 | GO:0070882            | cellular cell wall organization or bid | 0.43 | 1   | 0.27700832 | 53    | 0.15305975  |
| 3895  | GO:0005543            | phospholipid binding                   | 0.43 | 2   | 0.55401665 | 140   | 0.40430877  |
| 5732  | GO:0008194            | UDP-glucosyltransferase activity       | 0.43 | 4   | 1.1080333  | 322   | 0.9299102   |
| 4944  | GO:0006857            | oligopeptide transport                 | 0.43 | 2   | 0.55401665 | 141   | 0.4071967   |
| 9099  | GO:0015833            | peptide transport                      | 0.43 | 2   | 0.55401665 | 141   | 0.4071967   |
| 9600  | GO:0016491            | oxidoreductase activity                | 0.44 | 19  | 5.263158   | 1724  | 4.9787736   |
| 3449  | GO:0004842 GO:0004840 | ubiquitin-protein ligase activity      | 0.44 | 4   | 1.1080333  | 326   | 0.94146186  |
| 4224  | GO:0005984            | disaccharide metabolic process         | 0.44 | 1   | 0.27700832 | 56    | 0.16172351  |
| 9369  | GO:0016137            | glycoside metabolic process            | 0.44 | 1   | 0.27700832 | 56    | 0.16172351  |
| 15576 | GO:0033177            | proton-transporting two-sector ATP     | 0.44 | 1   | 0.27700832 | 56    | 0.16172351  |
| 19758 | GO:0043492            | ATPase activity, coupled to movem      | 0.44 | 3   | 0.83102494 | 235   | 0.67866117  |
| 26959 | GO:0055114            | oxidation-reduction process            | 0.44 | 27  | 7.479224   | 2490  | 7.1909204   |
| 9767  | GO:0016705            | oxidoreductase activity, acting on p   | 0.45 | 4   | 1.1080333  | 329   | 0.95012563  |
| 9813  | GO:0016759            | cellulose synthase activity            | 0.45 | 1   | 0.27700832 | 57    | 0.16461143  |
| 4913  | GO:0006814 GO:0006834 | sodium ion transport                   | 0.46 | 1   | 0.27700832 | 58    | 0.16749935  |
| 6665  | GO:0009311            | oligosaccharide metabolic process      | 0.46 | 1   | 0.27700832 | 58    | 0.16749935  |
| 8499  | GO:0015081 GO:0022816 | sodium ion transmembrane transp        | 0.46 | 1   | 0.27700832 | 58    | 0.16749935  |
| 18086 | GO:0035725            | sodium ion transmembrane transp        | 0.46 | 1   | 0.27700832 | 58    | 0.16749935  |
| 29800 | GO:0071436            | sodium ion export                      | 0.46 | 1   | 0.27700832 | 58    | 0.16749935  |
| 29919 | GO:0071555            | cell wall organization                 | 0.46 | 1   | 0.27700832 | 58    | 0.16749935  |
| 9654  | GO:0016567            | protein ubiquitination                 | 0.46 | 4   | 1.1080333  | 332   | 0.9587894   |
| 14854 | GO:0032446            | protein modification by small protei   | 0.46 | 4   | 1.1080333  | 332   | 0.9587894   |
| 29011 | GO:0070647            | protein modification by small protei   | 0.46 | 4   | 1.1080333  | 332   | 0.9587894   |
| 2831  | GO:0004022            | alcohol dehydrogenase (NAD) activi     | 0.46 | 1   | 0.27700832 | 59    | 0.17038727  |
| 5652  | GO:0008081 GO:0004434 | phosphoric diester hydrolase activi    | 0.47 | 1   | 0.27700832 | 60    | 0.17327519  |
| 5981  | GO:0008509            | anion transmembrane transporter a      | 0.47 | 3   | 0.83102494 | 245   | 0.70754033  |
| 11747 | GO:0019787 GO:0008639 | small conjugating protein ligase ac    | 0.47 | 4   | 1.1080333  | 339   | 0.9790048   |
| 2818  | GO:0004003            | ATP-dependent DNA helicase activi      | 0.47 | 1   | 0.27700832 | 61    | 0.1761631   |
| 4917  | GO:0006820 GO:0006822 | anion transport                        | 0.48 | 3   | 0.83102494 | 247   | 0.7133162   |
| 6424  | GO:0009055 GO:0009053 | electron carrier activity              | 0.48 | 2   | 0.55401665 | 154   | 0.44473964  |
| 9824  | GO:0016773            | phosphotransferase activity, alcoho    | 0.49 | 16  | 4.432133   | 1493  | 4.311664    |
| 9838  | GO:0016790            | thiolester hydrolase activity          | 0.49 | 1   | 0.27700832 | 65    | 0.18771479  |
| 2629  | GO:0003678 GO:0003679 | DNA helicase activity                  | 0.50 | 1   | 0.27700832 | 67    | 0.19349062  |
| 5764  | GO:0008234 GO:0004220 | cysteine-type peptidase activity       | 0.51 | 2   | 0.55401665 | 163   | 0.47073093  |
| 8749  | GO:0015399            | primary active transmembrane tran      | 0.51 | 3   | 0.83102494 | 260   | 0.75085914  |
| 8753  | GO:0015405            | P-P-bond-hydrolysis-driven transm      | 0.51 | 3   | 0.83102494 | 260   | 0.75085914  |
| 31420 | GO:0080043            | quercetin 3-O-glucosyltransferase      | 0.52 | 1   | 0.27700832 | 69    | 0.19926646  |
| 9911  | GO:0016879            | ligase activity, forming carbon-nitro  | 0.52 | 5   | 1.3850416  | 456   | 1.3168914   |
| 9191  | GO:0015931            | nucleobase, nucleoside, nucleotide     | 0.52 | 1   | 0.27700832 | 70    | 0.20215438  |
| 9192  | GO:0015932            | nucleobase, nucleoside, nucleotide     | 0.52 | 1   | 0.27700832 | 70    | 0.20215438  |
| 25998 | GO:0051716            | cellular response to stimulus          | 0.52 | 12  | 3.3240998  | 1138  | 3.2864528   |
| 3744  | GO:0005244            | voltage-gated ion channel activity     | 0.53 | 1   | 0.27700832 | 72    | 0.20793022  |
| 12528 | GO:0022832            | voltage-gated channel activity         | 0.53 | 1   | 0.27700832 | 72    | 0.20793022  |
| 15280 | GO:0032879            | regulation of localization             | 0.53 | 1   | 0.27700832 | 72    | 0.20793022  |
| 17141 | GO:0034762            | regulation of transmembrane trans      | 0.53 | 1   | 0.27700832 | 72    | 0.20793022  |
| 17144 | GO:0034765            | regulation of ion transmembrane tr     | 0.53 | 1   | 0.27700832 | 72    | 0.20793022  |



|       |                       |                                        |      |    |            |      |            |
|-------|-----------------------|----------------------------------------|------|----|------------|------|------------|
| 19568 | GO:0043269            | regulation of ion transport            | 0.53 | 1  | 0.27700832 | 72   | 0.20793022 |
| 25348 | GO:0051049            | regulation of transport                | 0.53 | 1  | 0.27700832 | 72   | 0.20793022 |
| 12573 | GO:0022891            | substrate-specific transmembrane       | 0.53 | 13 | 3.601108   | 1241 | 3.5839086  |
| 3311  | GO:0004683 GO:0004684 | calmodulin-dependent protein kina      | 0.54 | 1  | 0.27700832 | 74   | 0.21370606 |
| 9817  | GO:0016763            | transferase activity, transferring pe  | 0.54 | 1  | 0.27700832 | 74   | 0.21370606 |
| 8810  | GO:0015491            | cation:cation antiporter activity      | 0.54 | 1  | 0.27700832 | 75   | 0.21659398 |
| 9488  | GO:0016301            | kinase activity                        | 0.55 | 18 | 4.98615    | 1740 | 5.0249805  |
| 5663  | GO:0008094 GO:0004011 | DNA-dependent ATPase activity          | 0.55 | 1  | 0.27700832 | 76   | 0.2194819  |
| 8943  | GO:0015672            | monovalent inorganic cation transp     | 0.57 | 4  | 1.1080333  | 383  | 1.1060733  |
| 3787  | GO:0005319            | lipid transporter activity             | 0.58 | 1  | 0.27700832 | 83   | 0.23969735 |
| 12547 | GO:0022857 GO:0005386 | transmembrane transporter activity     | 0.58 | 15 | 4.1551247  | 1483 | 4.282785   |
| 3048  | GO:0004364            | glutathione transferase activity       | 0.59 | 1  | 0.27700832 | 84   | 0.24258527 |
| 4643  | GO:0006511            | ubiquitin-dependent protein catabo     | 0.59 | 1  | 0.27700832 | 84   | 0.24258527 |
| 4912  | GO:0006813 GO:0015458 | potassium ion transport                | 0.59 | 1  | 0.27700832 | 84   | 0.24258527 |
| 11864 | GO:0019941            | modification-dependent protein cat     | 0.59 | 1  | 0.27700832 | 84   | 0.24258527 |
| 19989 | GO:0043632            | modification-dependent macromole       | 0.59 | 1  | 0.27700832 | 84   | 0.24258527 |
| 20507 | GO:0044257            | cellular protein catabolic process     | 0.59 | 1  | 0.27700832 | 84   | 0.24258527 |
| 25887 | GO:0051603            | proteolysis involved in cellular prot  | 0.59 | 1  | 0.27700832 | 84   | 0.24258527 |
| 30168 | GO:0071804            | cellular potassium ion transport       | 0.59 | 1  | 0.27700832 | 84   | 0.24258527 |
| 30169 | GO:0071805            | potassium ion transmembrane tran       | 0.59 | 1  | 0.27700832 | 84   | 0.24258527 |
| 3716  | GO:0005198            | structural molecule activity           | 0.59 | 4  | 1.1080333  | 393  | 1.1349525  |
| 4916  | GO:0006818            | hydrogen transport                     | 0.59 | 3  | 0.83102494 | 292  | 0.84327257 |
| 9246  | GO:0015992            | proton transport                       | 0.59 | 3  | 0.83102494 | 292  | 0.84327257 |
| 25195 | GO:0050896 GO:0051869 | response to stimulus                   | 0.59 | 19 | 5.263158   | 1881 | 5.432177   |
| 12734 | GO:0030163            | protein catabolic process              | 0.59 | 1  | 0.27700832 | 86   | 0.24836111 |
| 20515 | GO:0044265 GO:0034962 | cellular macromolecule catabolic p     | 0.59 | 1  | 0.27700832 | 86   | 0.24836111 |
| 20624 | GO:0044430            | cytoskeletal part                      | 0.60 | 1  | 0.27700832 | 88   | 0.25413695 |
| 14590 | GO:0032182            | small conjugating protein binding      | 0.61 | 1  | 0.27700832 | 90   | 0.2599128  |
| 3644  | GO:0005102            | receptor binding                       | 0.62 | 1  | 0.27700832 | 91   | 0.2628007  |
| 18633 | GO:0042277            | peptide binding                        | 0.63 | 1  | 0.27700832 | 95   | 0.27435237 |
| 3200  | GO:0004553 GO:0016800 | hydrolase activity, hydrolyzing O-g    | 0.63 | 3  | 0.83102494 | 312  | 0.90103096 |
| 9811  | GO:0016757 GO:0016932 | transferase activity, transferring gly | 0.64 | 7  | 1.9390582  | 729  | 2.1052935  |
| 4954  | GO:0006869            | lipid transport                        | 0.64 | 2  | 0.55401665 | 208  | 0.6006873  |
| 8085  | GO:0010876            | lipid localization                     | 0.64 | 2  | 0.55401665 | 208  | 0.6006873  |
| 16603 | GO:0034220            | ion transmembrane transport            | 0.64 | 8  | 2.2160666  | 833  | 2.4056373  |
| 8681  | GO:0015299            | solute:hydrogen antiporter activity    | 0.64 | 1  | 0.27700832 | 98   | 0.28301615 |
| 30066 | GO:0071702            | organic substance transport            | 0.65 | 5  | 1.3850416  | 529  | 1.5277096  |
| 16430 | GO:0034046            | poly(G) RNA binding                    | 0.65 | 1  | 0.27700832 | 100  | 0.28879198 |
| 26931 | GO:00055085           | transmembrane transport                | 0.65 | 15 | 4.1551247  | 1548 | 4.4705     |
| 4408  | GO:0006200            | ATP catabolic process                  | 0.66 | 6  | 1.6620499  | 641  | 1.8511566  |
| 9918  | GO:0016887 GO:0004002 | ATPase activity                        | 0.66 | 6  | 1.6620499  | 641  | 1.8511566  |
| 21600 | GO:0046034            | ATP metabolic process                  | 0.66 | 6  | 1.6620499  | 641  | 1.8511566  |
| 26845 | GO:0052689            | carboxylic ester hydrolase activity    | 0.66 | 5  | 1.3850416  | 538  | 1.5537009  |
| 23515 | GO:0048037            | cofactor binding                       | 0.66 | 3  | 0.83102494 | 327  | 0.94434977 |
| 9579  | GO:0016462            | pyrophosphatase activity               | 0.67 | 9  | 2.493075   | 954  | 2.7550755  |
| 12574 | GO:0022892            | substrate-specific transporter activ   | 0.67 | 14 | 3.8781164  | 1463 | 4.2250266  |
| 9859  | GO:0016818            | hydrolase activity, acting on acid a   | 0.67 | 9  | 2.493075   | 956  | 2.7608514  |
| 2668  | GO:0003779            | actin binding                          | 0.67 | 1  | 0.27700832 | 105  | 0.3032316  |
| 9858  | GO:0016817            | hydrolase activity, acting on acid a   | 0.67 | 9  | 2.493075   | 959  | 2.769515   |
| 6426  | GO:0009057 GO:0043285 | macromolecule catabolic process        | 0.67 | 1  | 0.27700832 | 106  | 0.3061195  |
| 12572 | GO:0022890 GO:0015082 | inorganic cation transmembrane tr      | 0.67 | 3  | 0.83102494 | 332  | 0.9587894  |
| 3942  | GO:0005618            | cell wall                              | 0.67 | 1  | 0.27700832 | 107  | 0.30900744 |
| 12868 | GO:0030312            | external encapsulating structure       | 0.69 | 1  | 0.27700832 | 111  | 0.3205591  |
| 8680  | GO:0015298            | solute:cation antiporter activity      | 0.69 | 1  | 0.27700832 | 112  | 0.32344702 |
| 29081 | GO:0070717            | poly-purine tract binding              | 0.69 | 1  | 0.27700832 | 112  | 0.32344702 |
| 6796  | GO:0009507            | chloroplast                            | 0.69 | 2  | 0.55401665 | 229  | 0.6613336  |
| 9933  | GO:0016903            | oxidoreductase activity, acting on t   | 0.69 | 1  | 0.27700832 | 113  | 0.32633495 |
| 4405  | GO:0006195            | purine nucleotide catabolic process    | 0.70 | 7  | 1.9390582  | 773  | 2.232362   |
| 6508  | GO:0009143            | nucleoside triphosphate catabolic p    | 0.70 | 7  | 1.9390582  | 773  | 2.232362   |
| 6509  | GO:0009144            | purine nucleoside triphosphate me      | 0.70 | 7  | 1.9390582  | 773  | 2.232362   |
| 6511  | GO:0009146            | purine nucleoside triphosphate cat     | 0.70 | 7  | 1.9390582  | 773  | 2.232362   |
| 6519  | GO:0009154            | purine ribonucleotide catabolic pro    | 0.70 | 7  | 1.9390582  | 773  | 2.232362   |
| 6530  | GO:0009166            | nucleotide catabolic process           | 0.70 | 7  | 1.9390582  | 773  | 2.232362   |
| 6567  | GO:0009203            | ribonucleoside triphosphate catabo     | 0.70 | 7  | 1.9390582  | 773  | 2.232362   |
| 6569  | GO:0009205            | purine ribonucleoside triphosphate     | 0.70 | 7  | 1.9390582  | 773  | 2.232362   |
| 6571  | GO:0009207            | purine ribonucleoside triphosphate     | 0.70 | 7  | 1.9390582  | 773  | 2.232362   |
| 6624  | GO:0009261            | ribonucleotide catabolic process       | 0.70 | 7  | 1.9390582  | 773  | 2.232362   |
| 17034 | GO:0034655            | nucleobase, nucleoside, nucleotide     | 0.70 | 7  | 1.9390582  | 773  | 2.232362   |
| 17035 | GO:0034656            | nucleobase, nucleoside and nucle       | 0.70 | 7  | 1.9390582  | 773  | 2.232362   |
| 22209 | GO:0046700            | heterocycle catabolic process          | 0.70 | 7  | 1.9390582  | 773  | 2.232362   |
| 30879 | GO:0072523            | purine-containing compound catab       | 0.70 | 7  | 1.9390582  | 773  | 2.232362   |
| 10058 | GO:0017111            | nucleoside-triphosphatase activity     | 0.70 | 8  | 2.2160666  | 878  | 2.5355935  |
| 20520 | GO:0044270            | cellular nitrogen compound catabo      | 0.70 | 7  | 1.9390582  | 777  | 2.2439137  |
| 4215  | GO:0005975            | carbohydrate metabolic process         | 0.71 | 9  | 2.493075   | 990  | 2.8590407  |
| 20498 | GO:0044248            | cellular catabolic process             | 0.72 | 8  | 2.2160666  | 894  | 2.5818002  |
| 6563  | GO:0009199            | ribonucleoside triphosphate metab      | 0.72 | 7  | 1.9390582  | 790  | 2.2814567  |
| 6515  | GO:0009150            | purine ribonucleotide metabolic pro    | 0.72 | 7  | 1.9390582  | 791  | 2.2843447  |
| 9823  | GO:0016772            | transferase activity, transferring ph  | 0.72 | 18 | 4.98615    | 1932 | 5.579461   |
| 12532 | GO:0022836            | gated channel activity                 | 0.72 | 1  | 0.27700832 | 122  | 0.3523262  |
| 3260  | GO:0004620            | phospholipase activity                 | 0.73 | 1  | 0.27700832 | 123  | 0.35521415 |
| 6506  | GO:0009141            | nucleoside triphosphate metabolic      | 0.73 | 7  | 1.9390582  | 796  | 2.2987843  |
| 2660  | GO:0003735 GO:0003736 | structural constituent of ribosome     | 0.73 | 2  | 0.55401665 | 246  | 0.7104283  |
| 6824  | GO:0009536            | plastid                                | 0.73 | 2  | 0.55401665 | 247  | 0.7133162  |
| 4121  | GO:0005856            | cytoskeleton                           | 0.73 | 1  | 0.27700832 | 126  | 0.3638779  |
| 9583  | GO:0016469            | proton-transporting two-sector ATP     | 0.74 | 1  | 0.27700832 | 127  | 0.36676583 |
| 4373  | GO:0006163            | purine nucleotide metabolic proces     | 0.74 | 7  | 1.9390582  | 810  | 2.339215   |
| 6622  | GO:0009259 GO:0009121 | ribonucleotide metabolic process       | 0.74 | 7  | 1.9390582  | 812  | 2.344991   |
| 9906  | GO:0016874            | ligase activity                        | 0.75 | 5  | 1.3850416  | 597  | 1.7240882  |
| 2758  | GO:0003924            | GTPase activity                        | 0.75 | 1  | 0.27700832 | 132  | 0.3812054  |
| 4394  | GO:0006184            | GTP catabolic process                  | 0.75 | 1  | 0.27700832 | 132  | 0.3812054  |
| 21605 | GO:0046039            | GTP metabolic process                  | 0.75 | 1  | 0.27700832 | 132  | 0.3812054  |
| 5809  | GO:0008289            | lipid binding                          | 0.75 | 2  | 0.55401665 | 258  | 0.74508333 |
| 30306 | GO:0071944            | cell periphery                         | 0.75 | 2  | 0.55401665 | 259  | 0.74797124 |
| 3242  | GO:0004601 GO:0016685 | peroxidase activity                    | 0.76 | 1  | 0.27700832 | 135  | 0.38986918 |
| 9754  | GO:0016684            | oxidoreductase activity, acting on p   | 0.76 | 1  | 0.27700832 | 135  | 0.38986918 |
| 8494  | GO:0015075            | ion transmembrane transporter act      | 0.76 | 7  | 1.9390582  | 827  | 2.3883097  |
| 30877 | GO:0072521            | purine-containing compound metab       | 0.76 | 7  | 1.9390582  | 827  | 2.3883097  |
| 19126 | GO:0042803            | protein homodimerization activity      | 0.77 | 2  | 0.55401665 | 265  | 0.7652988  |

|       |                       |                                                                                     |      |    |            |       |            |
|-------|-----------------------|-------------------------------------------------------------------------------------|------|----|------------|-------|------------|
| 5018  | GO:0006950            | response to stress                                                                  | 0.77 | 5  | 1.3850416  | 611   | 1.764519   |
| 6425  | GO:0009056            | catabolic process                                                                   | 0.77 | 9  | 2.493075   | 1051  | 3.0352037  |
| 3724  | GO:0005216            | ion channel activity                                                                | 0.77 | 1  | 0.27700832 | 140   | 0.40430877 |
| 9266  | GO:0016020            | membrane                                                                            | 0.78 | 35 | 9.695291   | 3741  | 10.803708  |
| 19533 | GO:0043234            | protein complex                                                                     | 0.78 | 7  | 1.9390582  | 848   | 2.448956   |
| 4910  | GO:0006811            | ion transport                                                                       | 0.78 | 8  | 2.2160666  | 959   | 2.769515   |
| 20532 | GO:0044282            | small molecule catabolic process                                                    | 0.79 | 7  | 1.9390582  | 854   | 2.4662836  |
| 12794 | GO:0030234            | enzyme regulator activity                                                           | 0.79 | 3  | 0.83102494 | 403   | 1.1638317  |
| 8679  | GO:0015297            | antiporter activity                                                                 | 0.80 | 1  | 0.27700832 | 152   | 0.4389638  |
| 8682  | GO:0015300            | solute:solute antiporter activity                                                   | 0.80 | 1  | 0.27700832 | 152   | 0.4389638  |
| 13656 | GO:0031224            | intrinsic to membrane                                                               | 0.80 | 10 | 2.7700832  | 1193  | 3.4452884  |
| 3723  | GO:0005215 GO:0005478 | transporter activity                                                                | 0.81 | 16 | 4.432133   | 1844  | 5.325324   |
| 3888  | GO:0005529            | sugar binding                                                                       | 0.81 | 1  | 0.27700832 | 158   | 0.45629135 |
| 18953 | GO:0042623            | ATPase activity, coupled                                                            | 0.81 | 4  | 1.1080333  | 537   | 1.550813   |
| 5840  | GO:0008324            | cation transmembrane transporter                                                    | 0.81 | 4  | 1.1080333  | 538   | 1.5537009  |
| 9422  | GO:0016209            | antioxidant activity                                                                | 0.82 | 1  | 0.27700832 | 165   | 0.47650677 |
| 12516 | GO:0022804            | active transmembrane transporter                                                    | 0.83 | 6  | 1.6620499  | 787   | 2.2727928  |
| 4605  | GO:0006457 GO:0007022 | protein folding                                                                     | 0.84 | 1  | 0.27700832 | 173   | 0.49961013 |
| 4067  | GO:0005783            | endoplasmic reticulum                                                               | 0.84 | 1  | 0.27700832 | 174   | 0.50249803 |
| 4109  | GO:0005840 GO:0033279 | ribosome                                                                            | 0.84 | 5  | 1.3850416  | 682   | 1.9695613  |
| 4867  | GO:0006753            | nucleoside phosphate metabolic process                                              | 0.84 | 7  | 1.9390582  | 914   | 2.6395588  |
| 6484  | GO:0009117            | nucleotide metabolic process                                                        | 0.84 | 7  | 1.9390582  | 914   | 2.6395588  |
| 11787 | GO:0019842            | vitamin binding                                                                     | 0.84 | 1  | 0.27700832 | 177   | 0.5111618  |
| 4572  | GO:0006412 GO:0006416 | translation                                                                         | 0.85 | 1  | 0.27700832 | 180   | 0.5198256  |
| 5610  | GO:0008026            | ATP-dependent helicase activity                                                     | 0.85 | 1  | 0.27700832 | 183   | 0.52848935 |
| 28401 | GO:0070035            | purine NTP-dependent helicase activity                                              | 0.85 | 1  | 0.27700832 | 183   | 0.52848935 |
| 19125 | GO:0042802            | identical protein binding                                                           | 0.85 | 5  | 1.3850416  | 697   | 2.01288    |
| 9486  | GO:0016298            | lipase activity                                                                     | 0.86 | 1  | 0.27700832 | 185   | 0.53426516 |
| 9818  | GO:0016765 GO:0016766 | transferase activity, transferring alkyl groups                                     | 0.86 | 1  | 0.27700832 | 185   | 0.53426516 |
| 9836  | GO:0016787            | hydrolase activity                                                                  | 0.86 | 33 | 9.141274   | 3723  | 10.751725  |
| 2657  | GO:0003727 GO:0003728 | single-stranded RNA binding                                                         | 0.86 | 1  | 0.27700832 | 188   | 0.54292893 |
| 3068  | GO:0004386            | helicase activity                                                                   | 0.86 | 1  | 0.27700832 | 189   | 0.54581684 |
| 26932 | GO:0005086            | nucleobase, nucleoside and nucleotide metabolic process                             | 0.86 | 7  | 1.9390582  | 944   | 2.7261963  |
| 2897  | GO:0004091 GO:0004302 | carboxylesterase activity                                                           | 0.87 | 1  | 0.27700832 | 194   | 0.5602564  |
| 25095 | GO:0050790            | regulation of catalytic activity                                                    | 0.88 | 3  | 0.83102494 | 480   | 1.3862015  |
| 28366 | GO:0065009            | regulation of molecular function                                                    | 0.88 | 3  | 0.83102494 | 484   | 1.3977532  |
| 4909  | GO:0006810 GO:0015457 | transport                                                                           | 0.89 | 19 | 5.263158   | 2315  | 6.6855345  |
| 25529 | GO:0051234            | establishment of localization                                                       | 0.89 | 19 | 5.263158   | 2315  | 6.6855345  |
| 13018 | GO:0030529            | ribonucleoprotein complex                                                           | 0.89 | 5  | 1.3850416  | 741   | 2.1399486  |
| 25476 | GO:0051179            | localization                                                                        | 0.89 | 19 | 5.263158   | 2319  | 6.697086   |
| 21058 | GO:0045454 GO:0030503 | cell redox homeostasis                                                              | 0.89 | 1  | 0.27700832 | 211   | 0.6093511  |
| 30204 | GO:0071840            | cellular component organization or biogenesis                                       | 0.89 | 2  | 0.55401665 | 362   | 1.045427   |
| 22376 | GO:0046873            | metal ion transmembrane transporter activity                                        | 0.89 | 1  | 0.27700832 | 213   | 0.6151269  |
| 4558  | GO:0006396 GO:0006394 | RNA processing                                                                      | 0.90 | 1  | 0.27700832 | 219   | 0.63245445 |
| 12608 | GO:0030001            | metal ion transport                                                                 | 0.90 | 2  | 0.55401665 | 374   | 1.080082   |
| 22479 | GO:0046983            | protein dimerization activity                                                       | 0.91 | 3  | 0.83102494 | 517   | 1.4930545  |
| 13531 | GO:0031072            | heat shock protein binding                                                          | 0.91 | 1  | 0.27700832 | 230   | 0.6642216  |
| 11695 | GO:0019725            | cellular homeostasis                                                                | 0.91 | 1  | 0.27700832 | 234   | 0.67577326 |
| 15392 | GO:0032991            | macromolecular complex                                                              | 0.92 | 12 | 3.3240998  | 1616  | 4.666878   |
| 4911  | GO:0006812 GO:0006819 | cation transport                                                                    | 0.92 | 4  | 1.1080333  | 662   | 1.9118029  |
| 3877  | GO:0005516            | calmodulin binding                                                                  | 0.92 | 1  | 0.27700832 | 236   | 0.6815491  |
| 11828 | GO:0019899            | enzyme binding                                                                      | 0.92 | 1  | 0.27700832 | 237   | 0.684437   |
| 18925 | GO:0042592            | homeostatic process                                                                 | 0.92 | 1  | 0.27700832 | 238   | 0.68732494 |
| 15436 | GO:0033036            | macromolecule localization                                                          | 0.92 | 2  | 0.55401665 | 397   | 1.1465042  |
| 19527 | GO:0043228            | non-membrane-bounded organelle                                                      | 0.92 | 6  | 1.6620499  | 923   | 2.66555    |
| 19531 | GO:0043232            | intracellular non-membrane-bounded organelle                                        | 0.92 | 6  | 1.6620499  | 923   | 2.66555    |
| 3885  | GO:0005525            | GTP binding                                                                         | 0.92 | 1  | 0.27700832 | 245   | 0.70754033 |
| 11032 | GO:0019001            | guanyl nucleotide binding                                                           | 0.92 | 1  | 0.27700832 | 245   | 0.70754033 |
| 14967 | GO:0032561            | guanyl ribonucleotide binding                                                       | 0.92 | 1  | 0.27700832 | 245   | 0.70754033 |
| 20619 | GO:0044425            | membrane part                                                                       | 0.92 | 11 | 3.0470915  | 1523  | 4.398302   |
| 20512 | GO:0044262 GO:0006092 | cellular carbohydrate metabolic process                                             | 0.93 | 1  | 0.27700832 | 248   | 0.7162041  |
| 5661  | GO:0008092            | cytoskeletal protein binding                                                        | 0.93 | 1  | 0.27700832 | 249   | 0.719092   |
| 9285  | GO:0016043            | cellular component organization or biogenesis                                       | 0.94 | 1  | 0.27700832 | 261   | 0.7537471  |
| 9699  | GO:0016616            | oxidoreductase activity, acting on iron                                             | 0.94 | 1  | 0.27700832 | 266   | 0.7681867  |
| 22007 | GO:0046483            | heterocycle metabolic process                                                       | 0.94 | 7  | 1.9390582  | 1094  | 3.1593843  |
| 9267  | GO:0016021            | integral to membrane                                                                | 0.94 | 7  | 1.9390582  | 1103  | 3.1853757  |
| 3874  | GO:0005509            | calcium ion binding                                                                 | 0.95 | 1  | 0.27700832 | 279   | 0.8057296  |
| 18912 | GO:0042578            | phosphoric ester hydrolase activity                                                 | 0.95 | 2  | 0.55401665 | 444   | 1.2822365  |
| 30205 | GO:0071841            | cellular component organization or biogenesis                                       | 0.95 | 1  | 0.27700832 | 285   | 0.8230572  |
| 9697  | GO:0016614            | oxidoreductase activity, acting on carbon                                           | 0.95 | 1  | 0.27700832 | 293   | 0.84616053 |
| 28365 | GO:0065008            | regulation of biological quality                                                    | 0.96 | 1  | 0.27700832 | 316   | 0.9125827  |
| 4849  | GO:0006730 GO:0019753 | one-carbon metabolic process                                                        | 0.97 | 1  | 0.27700832 | 325   | 0.93857396 |
| 25098 | GO:0050794 GO:0051244 | regulation of cellular process                                                      | 0.97 | 31 | 8.587257   | 3987  | 11.514136  |
| 20638 | GO:0044444            | cytoplasmic part                                                                    | 0.98 | 10 | 2.7700832  | 1644  | 4.7477403  |
| 25094 | GO:0050789 GO:0050791 | regulation of biological process                                                    | 0.98 | 33 | 9.141274   | 4315  | 12.461374  |
| 9795  | GO:0016740            | transferase activity                                                                | 0.98 | 28 | 7.7562327  | 3764  | 10.870131  |
| 9839  | GO:0016791 GO:0016302 | phosphatase activity                                                                | 0.98 | 1  | 0.27700832 | 383   | 1.1060733  |
| 28364 | GO:0065007            | biological regulation                                                               | 0.98 | 33 | 9.141274   | 4376  | 12.637537  |
| 4755  | GO:0006629            | lipid metabolic process                                                             | 0.99 | 2  | 0.55401665 | 590   | 1.7038727  |
| 8673  | GO:0015291 GO:0015290 | secondary active transmembrane transporter activity                                 | 0.99 | 1  | 0.27700832 | 407   | 1.1753833  |
| 2674  | GO:0003824            | catalytic activity                                                                  | 0.99 | 93 | 25.761772  | 10750 | 31.045137  |
| 9494  | GO:0016311            | dephosphorylation                                                                   | 0.99 | 1  | 0.27700832 | 425   | 1.227366   |
| 9837  | GO:0016788            | hydrolase activity, acting on ester bonds                                           | 0.99 | 8  | 2.2160666  | 1534  | 4.430069   |
| 4530  | GO:0006355 GO:0032583 | regulation of transcription, DNA-dependent                                          | 0.99 | 16 | 4.432133   | 2591  | 7.4826     |
| 25544 | GO:0051252            | regulation of RNA metabolic process                                                 | 0.99 | 16 | 4.432133   | 2593  | 7.488376   |
| 4526  | GO:0006351 GO:0006350 | transcription, DNA-dependent                                                        | 0.99 | 8  | 2.2160666  | 1575  | 4.548474   |
| 15176 | GO:0032774            | RNA biosynthetic process                                                            | 0.99 | 8  | 2.2160666  | 1575  | 4.548474   |
| 7141  | GO:0009889            | regulation of biosynthetic process                                                  | 0.99 | 16 | 4.432133   | 2605  | 7.523031   |
| 7772  | GO:0010556            | regulation of macromolecule biosynthesis                                            | 0.99 | 16 | 4.432133   | 2605  | 7.523031   |
| 13756 | GO:0031326            | regulation of cellular biosynthetic process                                         | 0.99 | 16 | 4.432133   | 2605  | 7.523031   |
| 32213 | GO:2000112            | regulation of cellular macromolecule biosynthesis                                   | 0.99 | 16 | 4.432133   | 2605  | 7.523031   |
| 4027  | GO:0005737            | cytoplasm                                                                           | 0.99 | 11 | 3.0470915  | 2001  | 5.7787275  |
| 7692  | GO:0010468            | regulation of gene expression                                                       | 0.99 | 16 | 4.432133   | 2635  | 7.6096687  |
| 20640 | GO:0044446            | intracellular organelle part                                                        | 1.00 | 2  | 0.55401665 | 710   | 2.0504231  |
| 27228 | GO:0060255            | regulation of macromolecule metabolism                                              | 1.00 | 16 | 4.432133   | 2660  | 7.6818666  |
| 20616 | GO:0044422            | organelle part                                                                      | 1.00 | 2  | 0.55401665 | 712   | 2.0561988  |
| 11221 | GO:0019219            | regulation of nucleobase, nucleoside, nucleotide and nucleic acid metabolic process | 1.00 | 16 | 4.432133   | 2675  | 7.7251854  |
| 25468 | GO:0051171            | regulation of nitrogen compound metabolic process                                   | 1.00 | 16 | 4.432133   | 2675  | 7.7251854  |



|       |                       |                                       |      |     |            |       |           |
|-------|-----------------------|---------------------------------------|------|-----|------------|-------|-----------|
| 131   | GO:0000166            | nucleotide binding                    | 1.00 | 5   | 1.3850416  | 1213  | 3.5030468 |
| 3884  | GO:0005524            | ATP binding                           | 1.00 | 1   | 0.27700832 | 524   | 1.51327   |
| 2628  | GO:0003677            | DNA binding                           | 1.00 | 5   | 1.3850416  | 1224  | 3.534814  |
| 31465 | GO:0080090            | regulation of primary metabolic pro   | 1.00 | 16  | 4.432133   | 2710  | 7.826263  |
| 3876  | GO:0005515 GO:0045308 | protein binding                       | 1.00 | 53  | 14.68144   | 6933  | 20.021948 |
| 13041 | GO:0030554            | adenyl nucleotide binding             | 1.00 | 1   | 0.27700832 | 550   | 1.5883559 |
| 14965 | GO:0032559            | adenyl ribonucleotide binding         | 1.00 | 1   | 0.27700832 | 550   | 1.5883559 |
| 11224 | GO:0019222            | regulation of metabolic process       | 1.00 | 19  | 5.263158   | 3115  | 8.995871  |
| 7691  | GO:0010467            | gene expression                       | 1.00 | 10  | 2.7700832  | 1974  | 5.7007537 |
| 18000 | GO:0035639            | purine ribonucleoside triphosphate    | 1.00 | 2   | 0.55401665 | 769   | 2.2208104 |
| 9308  | GO:0016070            | RNA metabolic process                 | 1.00 | 9   | 2.493075   | 1855  | 5.3570914 |
| 13753 | GO:0031323            | regulation of cellular metabolic pro  | 1.00 | 16  | 4.432133   | 2770  | 7.999538  |
| 14959 | GO:0032553            | ribonucleotide binding                | 1.00 | 2   | 0.55401665 | 795   | 2.2958963 |
| 14961 | GO:0032555            | purine ribonucleotide binding         | 1.00 | 2   | 0.55401665 | 795   | 2.2958963 |
| 10033 | GO:0017076            | purine nucleotide binding             | 1.00 | 2   | 0.55401665 | 797   | 2.3016722 |
| 2627  | GO:0003676            | nucleic acid binding                  | 1.00 | 13  | 3.601108   | 2453  | 7.0840673 |
| 20531 | GO:0044281            | small molecule metabolic process      | 1.00 | 8   | 2.2160666  | 1788  | 5.1636004 |
| 3863  | GO:0005488            | binding                               | 1.00 | 118 | 32.68698   | 13903 | 40.15075  |
| 3903  | GO:0005575 GO:0008372 | cellular_component                    | 1.00 | 65  | 18.00554   | 8515  | 24.590637 |
| 3946  | GO:0005623            | cell                                  | 1.00 | 62  | 17.174515  | 8227  | 23.758917 |
| 20657 | GO:0044464            | cell part                             | 1.00 | 62  | 17.174515  | 8227  | 23.758917 |
| 716   | GO:0001071            | nucleic acid binding transcription fa | 1.00 | 5   | 1.3850416  | 1417  | 4.0921826 |
| 2643  | GO:0003700 GO:0000130 | sequence-specific DNA binding tra     | 1.00 | 5   | 1.3850416  | 1417  | 4.0921826 |
| 3955  | GO:0005634            | nucleus                               | 1.00 | 5   | 1.3850416  | 1433  | 4.138389  |
| 19525 | GO:0043226            | organelle                             | 1.00 | 15  | 4.1551247  | 3013  | 8.701303  |
| 19528 | GO:0043229            | intracellular organelle               | 1.00 | 15  | 4.1551247  | 3013  | 8.701303  |
| 2653  | GO:0003723            | RNA binding                           | 1.00 | 1   | 0.27700832 | 797   | 2.3016722 |
| 19526 | GO:0043227            | membrane-bounded organelle            | 1.00 | 8   | 2.2160666  | 2142  | 6.185924  |
| 19530 | GO:0043231            | intracellular membrane-bounded o      | 1.00 | 8   | 2.2160666  | 2142  | 6.185924  |
| 20618 | GO:0044424            | intracellular part                    | 1.00 | 20  | 5.5401664  | 3853  | 11.127155 |
| 3945  | GO:0005622            | intracellular                         | 1.00 | 26  | 7.202216   | 4751  | 13.720507 |
| 2626  | GO:0003674 GO:0005554 | molecular_function                    | 1.00 | 210 | 58.171745  | 24394 | 70.447914 |

| GO ID | GO ACCESSION | GO Term                                                | p-value | Count in Selection | % Count in Selection | Count in Total | % Count in Total |
|-------|--------------|--------------------------------------------------------|---------|--------------------|----------------------|----------------|------------------|
| 5704  | GO:0008150   | biological process                                     | 0.00    | 163                | 79.12621             | 22215          | 64.155136        |
| 5705  | GO:0008152   | metabolic process                                      | 0.00    | 135                | 65.53398             | 17432          | 50.34222         |
| 9869  | GO:0016829   | lyase activity                                         | 0.00    | 12                 | 5.8252425            | 488            | 1.4093049        |
| 11776 | GO:0019825   | oxygen binding                                         | 0.00    | 10                 | 4.854369             | 389            | 1.1234008        |
| 16391 | GO:0034007   | S-linalool synthase activity                           | 0.00    | 2                  | 0.9708738            | 4              | 0.011551679      |
| 9600  | GO:0016491   | oxidoreductase activity                                | 0.00    | 22                 | 10.679611            | 1724           | 4.9787736        |
| 26959 | GO:0055114   | oxidation-reduction process                            | 0.00    | 28                 | 13.592233            | 2490           | 7.1909204        |
| 9832  | GO:0016782   | transferase activity, transferring sulfur-containing g | 0.00    | 4                  | 1.9417475            | 74             | 0.21370606       |
| 9877  | GO:0016838   | carbon-oxygen lyase activity, acting on phosphates     | 0.00    | 4                  | 1.9417475            | 77             | 0.22236982       |
| 2864  | GO:0004058   | aromatic-L-amino-acid decarboxylase activity           | 0.00    | 2                  | 0.9708738            | 9              | 0.025991278      |
| 26845 | GO:0052689   | carboxylic ester hydrolase activity                    | 0.00    | 10                 | 4.854369             | 538            | 1.5537009        |
| 21148 | GO:0045547   | dehydrodolichyl diphosphate synthase activity          | 0.00    | 2                  | 0.9708738            | 10             | 0.0288792        |
| 716   | GO:0001071   | nucleic acid binding transcription factor activity     | 0.00    | 18                 | 8.7378645            | 1417           | 4.0921826        |
| 2643  | GO:0003700   | sequence-specific DNA binding transcription factor     | 0.00    | 18                 | 8.7378645            | 1417           | 4.0921826        |
| 9870  | GO:0016830   | carbon-carbon lyase activity                           | 0.00    | 5                  | 2.4271846            | 161            | 0.4649551        |
| 29787 | GO:0071423   | malate transmembrane transport                         | 0.00    | 2                  | 0.9708738            | 14             | 0.040430877      |
| 9012  | GO:0015743   | malate transport                                       | 0.00    | 2                  | 0.9708738            | 14             | 0.040430877      |
| 8553  | GO:0015140   | malate transmembrane transporter activity              | 0.00    | 2                  | 0.9708738            | 14             | 0.040430877      |
| 9009  | GO:0015740   | C4-dicarboxylate transport                             | 0.00    | 2                  | 0.9708738            | 14             | 0.040430877      |
| 8859  | GO:0015556   | C4-dicarboxylate transmembrane transporter activi      | 0.00    | 2                  | 0.9708738            | 14             | 0.040430877      |
| 9767  | GO:0016705   | oxidoreductase activity, acting on paired donors, wi   | 0.00    | 7                  | 3.3980582            | 329            | 0.95012563       |
| 3382  | GO:0004768   | stearoyl-CoA 9-desaturase activity                     | 0.00    | 2                  | 0.9708738            | 16             | 0.046206716      |
| 4928  | GO:0006835   | dicarboxylic acid transport                            | 0.00    | 2                  | 0.9708738            | 16             | 0.046206716      |
| 7521  | GO:0010295   | (+)-abscisic acid 8'-hydroxylase activity              | 0.00    | 2                  | 0.9708738            | 16             | 0.046206716      |
| 3782  | GO:0005310   | dicarboxylic acid transmembrane transporter activi     | 0.00    | 2                  | 0.9708738            | 16             | 0.046206716      |
| 9427  | GO:0016215   | CoA desaturase activity                                | 0.00    | 2                  | 0.9708738            | 16             | 0.046206716      |
| 5702  | GO:0008146   | sulfotransferase activity                              | 0.00    | 3                  | 1.4563106            | 54             | 0.15594767       |
| 2674  | GO:0003824   | catalytic activity                                     | 0.00    | 82                 | 39.805824            | 10750          | 31.045137        |
| 9871  | GO:0016831   | carboxy-lyase activity                                 | 0.01    | 4                  | 1.9417475            | 115            | 0.3321108        |
| 8526  | GO:0015112   | nitrate transmembrane transporter activity             | 0.01    | 3                  | 1.4563106            | 61             | 0.1761631        |
| 8975  | GO:0015706   | nitrate transport                                      | 0.01    | 3                  | 1.4563106            | 61             | 0.1761631        |
| 11931 | GO:0020037   | heme binding                                           | 0.01    | 9                  | 4.3689322            | 550            | 1.5883559        |
| 3124  | GO:0004462   | lactoylglutathione lyase activity                      | 0.01    | 2                  | 0.9708738            | 20             | 0.0577584        |
| 15176 | GO:0032774   | RNA biosynthetic process                               | 0.01    | 18                 | 8.7378645            | 1575           | 4.548474         |
| 4526  | GO:0006351   | transcription, DNA-dependent                           | 0.01    | 18                 | 8.7378645            | 1575           | 4.548474         |
| 3129  | GO:0004467   | long-chain fatty acid-CoA ligase activity              | 0.01    | 2                  | 0.9708738            | 21             | 0.060646318      |
| 3872  | GO:0005506   | iron ion binding                                       | 0.01    | 9                  | 4.3689322            | 563            | 1.6258988        |
| 9771  | GO:0016709   | oxidoreductase activity, acting on paired donors, wi   | 0.01    | 3                  | 1.4563106            | 71             | 0.2050423        |
| 9779  | GO:0016717   | oxidoreductase activity, acting on paired donors, wi   | 0.01    | 2                  | 0.9708738            | 24             | 0.06931008       |
| 31493 | GO:0080118   | brassinosteroid sulfotransferase activity              | 0.01    | 2                  | 0.9708738            | 25             | 0.072197996      |
| 21145 | GO:0045543   | gibberellin 2-beta-dioxygenase activity                | 0.01    | 2                  | 0.9708738            | 25             | 0.072197996      |
| 22409 | GO:0046906   | tetrapyrrole binding                                   | 0.01    | 9                  | 4.3689322            | 596            | 1.7212002        |
| 9800  | GO:0016746   | transferase activity, transferring acyl groups         | 0.01    | 8                  | 3.883495             | 498            | 1.438184         |
| 8919  | GO:0015645   | fatty acid ligase activity                             | 0.01    | 2                  | 0.9708738            | 27             | 0.077973835      |
| 3113  | GO:0004451   | isocitrate lyase activity                              | 0.01    | 1                  | 0.4854369            | 2              | 0.00577584       |
| 21946 | GO:0046421   | methylisocitrate lyase activity                        | 0.01    | 1                  | 0.4854369            | 2              | 0.00577584       |
| 22988 | GO:0047501   | (+)-neomenthol dehydrogenase activity                  | 0.01    | 1                  | 0.4854369            | 2              | 0.00577584       |
| 22991 | GO:0047504   | (-)-menthol dehydrogenase activity                     | 0.01    | 1                  | 0.4854369            | 2              | 0.00577584       |
| 8517  | GO:0015103   | inorganic anion transmembrane transporter activity     | 0.01    | 4                  | 1.9417475            | 154            | 0.44473964       |
| 2870  | GO:0004064   | arylesterase activity                                  | 0.01    | 2                  | 0.9708738            | 30             | 0.086637594      |
| 8683  | GO:0015301   | anion:anion antiporter activity                        | 0.01    | 2                  | 0.9708738            | 30             | 0.086637594      |
| 5981  | GO:0008509   | anion transmembrane transporter activity               | 0.02    | 5                  | 2.4271846            | 245            | 0.70754033       |
| 4917  | GO:0006820   | anion transport                                        | 0.02    | 5                  | 2.4271846            | 247            | 0.7133162        |
| 4319  | GO:0006081   | cellular aldehyde metabolic process                    | 0.02    | 1                  | 0.4854369            | 3              | 0.00866376       |
| 4330  | GO:0006097   | glyoxylate cycle                                       | 0.02    | 1                  | 0.4854369            | 3              | 0.00866376       |
| 22011 | GO:0046487   | glyoxylate metabolic process                           | 0.02    | 1                  | 0.4854369            | 3              | 0.00866376       |
| 3134  | GO:0004474   | malate synthase activity                               | 0.02    | 1                  | 0.4854369            | 3              | 0.00866376       |
| 8159  | GO:0010951   | negative regulation of endopeptidase activity          | 0.02    | 3                  | 1.4563106            | 95             | 0.27435237       |
| 26712 | GO:0052548   | regulation of endopeptidase activity                   | 0.02    | 3                  | 1.4563106            | 95             | 0.27435237       |
| 28101 | GO:0061135   | endopeptidase regulator activity                       | 0.02    | 3                  | 1.4563106            | 95             | 0.27435237       |
| 3472  | GO:0004866   | endopeptidase inhibitor activity                       | 0.02    | 3                  | 1.4563106            | 95             | 0.27435237       |
| 3156  | GO:0004497   | monoxygenase activity                                  | 0.02    | 4                  | 1.9417475            | 172            | 0.49672222       |
| 9801  | GO:0016747   | transferase activity, transferring acyl groups other t | 0.02    | 7                  | 3.3980582            | 456            | 1.3168914        |
| 8967  | GO:0015698   | inorganic anion transport                              | 0.02    | 4                  | 1.9417475            | 176            | 0.5082739        |
| 5729  | GO:0008191   | metalloendopeptidase inhibitor activity                | 0.02    | 1                  | 0.4854369            | 4              | 0.011551679      |
| 7157  | GO:0009905   | ent-copalyl diphosphate synthase activity              | 0.02    | 1                  | 0.4854369            | 4              | 0.011551679      |
| 7792  | GO:0010576   | metalloenzyme regulator activity                       | 0.02    | 1                  | 0.4854369            | 4              | 0.011551679      |
| 9905  | GO:0016872   | intramolecular lyase activity                          | 0.02    | 1                  | 0.4854369            | 4              | 0.011551679      |
| 23942 | GO:0048551   | metalloenzyme inhibitor activity                       | 0.02    | 1                  | 0.4854369            | 4              | 0.011551679      |
| 24433 | GO:0050113   | inositol oxygenase activity                            | 0.02    | 1                  | 0.4854369            | 4              | 0.011551679      |
| 3661  | GO:0005125   | cytokine activity                                      | 0.02    | 1                  | 0.4854369            | 4              | 0.011551679      |
| 3674  | GO:0005138   | interleukin-6 receptor binding                         | 0.02    | 1                  | 0.4854369            | 4              | 0.011551679      |
| 4320  | GO:0006082   | organic acid metabolic process                         | 0.02    | 6                  | 2.9126213            | 369            | 1.0656425        |
| 11716 | GO:0019752   | carboxylic acid metabolic process                      | 0.02    | 6                  | 2.9126213            | 369            | 1.0656425        |
| 19707 | GO:0043436   | oxoacid metabolic process                              | 0.02    | 6                  | 2.9126213            | 369            | 1.0656425        |
| 18541 | GO:0042180   | cellular ketone metabolic process                      | 0.03    | 6                  | 2.9126213            | 375            | 1.0829699        |
| 7690  | GO:0010466   | negative regulation of peptidase activity              | 0.03    | 3                  | 1.4563106            | 110            | 0.31767118       |
| 12946 | GO:0030414   | peptidase inhibitor activity                           | 0.03    | 3                  | 1.4563106            | 110            | 0.31767118       |
| 25636 | GO:0051346   | negative regulation of hydrolase activity              | 0.03    | 3                  | 1.4563106            | 110            | 0.31767118       |
| 9308  | GO:0016070   | RNA metabolic process                                  | 0.03    | 18                 | 8.7378645            | 1855           | 5.3570914        |
| 2897  | GO:0004091   | carboxylesterase activity                              | 0.03    | 4                  | 1.9417475            | 194            | 0.5602564        |
| 3229  | GO:0004586   | ornithine decarboxylase activity                       | 0.03    | 1                  | 0.4854369            | 5              | 0.0144396        |
| 26711 | GO:0052547   | regulation of peptidase activity                       | 0.03    | 3                  | 1.4563106            | 112            | 0.32344702       |
| 28100 | GO:0061134   | peptidase regulator activity                           | 0.03    | 3                  | 1.4563106            | 112            | 0.32344702       |
| 11224 | GO:0019222   | regulation of metabolic process                        | 0.03    | 27                 | 13.106796            | 3115           | 8.995871         |
| 9874  | GO:0016835   | carbon-oxygen lyase activity                           | 0.03    | 4                  | 1.9417475            | 202            | 0.5833598        |



|       |            |                                                      |      |     |           |       |             |
|-------|------------|------------------------------------------------------|------|-----|-----------|-------|-------------|
| 26059 | GO:0051777 | ent-kaurenoate oxidase activity                      | 0.04 | 1   | 0.4854369 | 6     | 0.01732752  |
| 4530  | GO:0006355 | GO:regulation of transcription, DNA-dependent        | 0.04 | 23  | 11.165049 | 2591  | 7.4826      |
| 25544 | GO:0051252 | regulation of RNA metabolic process                  | 0.04 | 23  | 11.165049 | 2593  | 7.488376    |
| 6884  | GO:0009607 | response to biotic stimulus                          | 0.04 | 3   | 1.4563106 | 122   | 0.3523262   |
| 3293  | GO:0004659 | prenyltransferase activity                           | 0.04 | 2   | 0.9708738 | 51    | 0.14728391  |
| 7141  | GO:0009889 | regulation of biosynthetic process                   | 0.04 | 23  | 11.165049 | 2605  | 7.523031    |
| 7772  | GO:0010556 | regulation of macromolecule biosynthetic process     | 0.04 | 23  | 11.165049 | 2605  | 7.523031    |
| 13756 | GO:0031326 | regulation of cellular biosynthetic process          | 0.04 | 23  | 11.165049 | 2605  | 7.523031    |
| 32213 | GO:2000112 | regulation of cellular macromolecule biosynthetic pr | 0.04 | 23  | 11.165049 | 2605  | 7.523031    |
| 2626  | GO:0003674 | GO:molecular_function                                | 0.04 | 157 | 76.21359  | 24394 | 70.447914   |
| 16115 | GO:0033729 | anthocyanidin reductase activity                     | 0.04 | 1   | 0.4854369 | 7     | 0.020215439 |
| 7692  | GO:0010468 | regulation of gene expression                        | 0.04 | 23  | 11.165049 | 2635  | 7.6096687   |
| 9883  | GO:0016846 | carbon-sulfur lyase activity                         | 0.04 | 2   | 0.9708738 | 56    | 0.16172351  |
| 6427  | GO:0009058 | biosynthetic process                                 | 0.04 | 24  | 11.650485 | 2796  | 8.074624    |
| 7557  | GO:0010333 | terpene synthase activity                            | 0.05 | 2   | 0.9708738 | 57    | 0.16461143  |
| 27228 | GO:0060255 | regulation of macromolecule metabolic process        | 0.05 | 23  | 11.165049 | 2660  | 7.6818666   |
| 8725  | GO:0015367 | oxoglutarate:malate antiporter activity              | 0.05 | 1   | 0.4854369 | 8     | 0.023103358 |
| 9011  | GO:0015742 | alpha-ketoglutarate transport                        | 0.05 | 1   | 0.4854369 | 8     | 0.023103358 |
| 11196 | GO:0019187 | beta-1,4-mannosyltransferase activity                | 0.05 | 1   | 0.4854369 | 8     | 0.023103358 |
| 26035 | GO:0051753 | mannan synthase activity                             | 0.05 | 1   | 0.4854369 | 8     | 0.023103358 |
| 9754  | GO:0016684 | oxidoreductase activity, acting on peroxide as acce  | 0.05 | 3   | 1.4563106 | 135   | 0.38986918  |
| 3242  | GO:0004601 | GO:peroxidase activity                               | 0.05 | 3   | 1.4563106 | 135   | 0.38986918  |
| 11221 | GO:0019219 | regulation of nucleobase, nucleoside, nucleotide an  | 0.05 | 23  | 11.165049 | 2675  | 7.7251854   |
| 25468 | GO:0051171 | regulation of nitrogen compound metabolic process    | 0.05 | 23  | 11.165049 | 2675  | 7.7251854   |
| 7691  | GO:0010467 | gene expression                                      | 0.05 | 18  | 8.7378645 | 1974  | 5.7007537   |
| 7506  | GO:0010279 | indole-3-acetic acid amido synthetase activity       | 0.05 | 1   | 0.4854369 | 9     | 0.025991278 |
| 8661  | GO:0015269 | calcium-activated potassium channel activity         | 0.05 | 1   | 0.4854369 | 9     | 0.025991278 |
| 12534 | GO:0022839 | ion gated channel activity                           | 0.05 | 1   | 0.4854369 | 9     | 0.025991278 |
| 2823  | GO:0004014 | adenosylmethionine decarboxylase activity            | 0.05 | 1   | 0.4854369 | 9     | 0.025991278 |
| 3734  | GO:0005227 | calcium activated cation channel activity            | 0.05 | 1   | 0.4854369 | 9     | 0.025991278 |
| 17024 | GO:0034645 | GO:cellular macromolecule biosynthetic process       | 0.05 | 18  | 8.7378645 | 1999  | 5.7729516   |
| 6428  | GO:0009059 | GO:macromolecule biosynthetic process                | 0.05 | 18  | 8.7378645 | 2003  | 5.7845035   |
| 31465 | GO:0080090 | regulation of primary metabolic process              | 0.05 | 23  | 11.165049 | 2710  | 7.826263    |
| 9710  | GO:0016628 | oxidoreductase activity, acting on the CH-CH group   | 0.06 | 2   | 0.9708738 | 65    | 0.18771479  |
| 4878  | GO:0006772 | thiamine metabolic process                           | 0.06 | 1   | 0.4854369 | 10    | 0.0288792   |
| 6592  | GO:0009228 | thiamine biosynthetic process                        | 0.06 | 1   | 0.4854369 | 10    | 0.0288792   |
| 23116 | GO:0047631 | ADP-ribose diphosphatase activity                    | 0.06 | 1   | 0.4854369 | 10    | 0.0288792   |
| 29215 | GO:0070851 | growth factor receptor binding                       | 0.06 | 1   | 0.4854369 | 10    | 0.0288792   |
| 3056  | GO:0004372 | glycine hydroxymethyltransferase activity            | 0.06 | 1   | 0.4854369 | 10    | 0.0288792   |
| 3403  | GO:0004792 | thiosulfate sulfurtransferase activity               | 0.06 | 1   | 0.4854369 | 10    | 0.0288792   |
| 3473  | GO:0004867 | serine-type endopeptidase inhibitor activity         | 0.06 | 2   | 0.9708738 | 66    | 0.1906027   |
| 9849  | GO:0016803 | ether hydrolase activity                             | 0.06 | 1   | 0.4854369 | 11    | 0.03176712  |
| 2989  | GO:0004301 | epoxide hydrolase activity                           | 0.06 | 1   | 0.4854369 | 11    | 0.03176712  |
| 4755  | GO:0006629 | lipid metabolic process                              | 0.06 | 7   | 3.3980582 | 590   | 1.7038727   |
| 13753 | GO:0031323 | regulation of cellular metabolic process             | 0.07 | 23  | 11.165049 | 2770  | 7.999538    |
| 3464  | GO:0004857 | enzyme inhibitor activity                            | 0.07 | 3   | 1.4563106 | 157   | 0.4534034   |
| 3888  | GO:0005529 | sugar binding                                        | 0.07 | 3   | 1.4563106 | 158   | 0.45629135  |
| 9764  | GO:0016701 | oxidoreductase activity, acting on single donors wit | 0.07 | 2   | 0.9708738 | 72    | 0.20793022  |
| 7526  | GO:0010301 | GO:xanthoxin dehydrogenase activity                  | 0.07 | 1   | 0.4854369 | 12    | 0.03465504  |
| 19047 | GO:0042723 | thiamine-containing compound metabolic process       | 0.07 | 1   | 0.4854369 | 12    | 0.03465504  |
| 19048 | GO:0042724 | thiamine-containing compound biosynthetic process    | 0.07 | 1   | 0.4854369 | 12    | 0.03465504  |
| 7551  | GO:0010327 | acetyl CoA:(Z)-3-hexen-1-ol acetyltransferase activ  | 0.07 | 1   | 0.4854369 | 13    | 0.037542958 |
| 2896  | GO:0004090 | carbonyl reductase (NADPH) activity                  | 0.07 | 1   | 0.4854369 | 13    | 0.037542958 |
| 9422  | GO:0016209 | antioxidant activity                                 | 0.08 | 3   | 1.4563106 | 165   | 0.47650677  |
| 25094 | GO:0050789 | GO:regulation of biological process                  | 0.08 | 33  | 16.019417 | 4315  | 12.461374   |
| 9909  | GO:0016877 | ligase activity, forming carbon-sulfur bonds         | 0.08 | 2   | 0.9708738 | 78    | 0.22525774  |
| 9847  | GO:0016801 | hydrolase activity, acting on ether bonds            | 0.08 | 1   | 0.4854369 | 14    | 0.040430877 |
| 9873  | GO:0016833 | oxo-acid-lyase activity                              | 0.08 | 1   | 0.4854369 | 14    | 0.040430877 |
| 11157 | GO:0019144 | ADP-sugar diphosphatase activity                     | 0.08 | 1   | 0.4854369 | 14    | 0.040430877 |
| 31408 | GO:0080031 | methyl salicylate esterase activity                  | 0.08 | 1   | 0.4854369 | 14    | 0.040430877 |
| 3827  | GO:0005372 | water transmembrane transporter activity             | 0.08 | 2   | 0.9708738 | 81    | 0.23392151  |
| 4927  | GO:0006833 | water transport                                      | 0.08 | 2   | 0.9708738 | 81    | 0.23392151  |
| 8652  | GO:0015250 | water channel activity                               | 0.08 | 2   | 0.9708738 | 81    | 0.23392151  |
| 18429 | GO:0042044 | fluid transport                                      | 0.08 | 2   | 0.9708738 | 81    | 0.23392151  |
| 9340  | GO:0016108 | tetraterpenoid metabolic process                     | 0.09 | 1   | 0.4854369 | 15    | 0.043318797 |
| 9341  | GO:0016109 | tetraterpenoid biosynthetic process                  | 0.09 | 1   | 0.4854369 | 15    | 0.043318797 |
| 9348  | GO:0016116 | carotenoid metabolic process                         | 0.09 | 1   | 0.4854369 | 15    | 0.043318797 |
| 9349  | GO:0016117 | carotenoid biosynthetic process                      | 0.09 | 1   | 0.4854369 | 15    | 0.043318797 |
| 14101 | GO:0031683 | G-protein beta/gamma-subunit complex binding         | 0.09 | 1   | 0.4854369 | 15    | 0.043318797 |
| 2868  | GO:0004062 | aryl sulfotransferase activity                       | 0.09 | 1   | 0.4854369 | 15    | 0.043318797 |
| 22479 | GO:0046983 | protein dimerization activity                        | 0.09 | 6   | 2.9126213 | 517   | 1.4930545   |
| 28364 | GO:0065007 | biological regulation                                | 0.09 | 33  | 16.019417 | 4376  | 12.637537   |
| 5995  | GO:0008524 | glucose 6-phosphate:phosphate antiporter activity    | 0.09 | 1   | 0.4854369 | 16    | 0.046206716 |
| 8694  | GO:0015315 | organophosphate:inorganic phosphate antiporter ac    | 0.09 | 1   | 0.4854369 | 16    | 0.046206716 |
| 9797  | GO:0016742 | hydroxymethyl-, formyl- and related transferase act  | 0.09 | 1   | 0.4854369 | 16    | 0.046206716 |
| 31396 | GO:0080019 | fatty-acyl-CoA reductase (alcohol-forming) activity  | 0.09 | 1   | 0.4854369 | 16    | 0.046206716 |
| 219   | GO:0000287 | magnesium ion binding                                | 0.09 | 1   | 0.4854369 | 16    | 0.046206716 |
| 9697  | GO:0016614 | oxidoreductase activity, acting on CH-OH group of    | 0.10 | 4   | 1.9417475 | 293   | 0.84616053  |
| 9486  | GO:0016298 | lipase activity                                      | 0.10 | 3   | 1.4563106 | 185   | 0.53426516  |
| 8662  | GO:0015271 | outward rectifier potassium channel activity         | 0.10 | 1   | 0.4854369 | 18    | 0.051982556 |
| 28368 | GO:0070001 | aspartic-type peptidase activity                     | 0.10 | 1   | 0.4854369 | 18    | 0.051982556 |
| 2981  | GO:0004190 | aspartic-type endopeptidase activity                 | 0.10 | 1   | 0.4854369 | 18    | 0.051982556 |
| 19393 | GO:0043086 | negative regulation of catalytic activity            | 0.10 | 3   | 1.4563106 | 188   | 0.54292893  |
| 20342 | GO:0044092 | negative regulation of molecular function            | 0.10 | 3   | 1.4563106 | 188   | 0.54292893  |
| 20499 | GO:0044249 | cellular biosynthetic process                        | 0.10 | 21  | 10.194175 | 2635  | 7.6096687   |
| 24968 | GO:0050662 | coenzyme binding                                     | 0.11 | 3   | 1.4563106 | 191   | 0.5515927   |
| 25626 | GO:0051336 | regulation of hydrolase activity                     | 0.11 | 3   | 1.4563106 | 196   | 0.5660323   |
| 9833  | GO:0016783 | sulfurtransferase activity                           | 0.11 | 1   | 0.4854369 | 20    | 0.0577584   |
| 3628  | GO:0005086 | ARF guanyl-nucleotide exchange factor activity       | 0.11 | 1   | 0.4854369 | 20    | 0.0577584   |
| 24858 | GO:0050551 | myrcene synthase activity                            | 0.12 | 1   | 0.4854369 | 22    | 0.06353424  |

|       |               |                                                        |      |    |           |      |             |
|-------|---------------|--------------------------------------------------------|------|----|-----------|------|-------------|
| 9795  | GO:0016740    | transferase activity                                   | 0.13 | 28 | 13.592233 | 3764 | 10.870131   |
| 9709  | GO:0016627    | oxidoreductase activity, acting on the CH-CH group     | 0.13 | 2  | 0.9708738 | 104  | 0.30034366  |
| 22414 | GO:0046912    | transferase activity, transferring acyl groups, acyl g | 0.13 | 1  | 0.4854369 | 23   | 0.06642216  |
| 3662  | GO:0005126    | cytokine receptor binding                              | 0.13 | 1  | 0.4854369 | 23   | 0.06642216  |
| 19253 | GO:0042936    | dipeptide transporter activity                         | 0.13 | 2  | 0.9708738 | 105  | 0.3032316   |
| 19255 | GO:0042938    | dipeptide transport                                    | 0.13 | 2  | 0.9708738 | 105  | 0.3032316   |
| 23515 | GO:0048037    | cofactor binding                                       | 0.13 | 4  | 1.9417475 | 327  | 0.94434977  |
| 4692  | GO:0006563    | L-serine metabolic process                             | 0.13 | 1  | 0.4854369 | 24   | 0.06931008  |
| 25578 | GO:0051287 GO | NAD binding                                            | 0.13 | 1  | 0.4854369 | 24   | 0.06931008  |
| 31407 | GO:0080030    | methyl indole-3-acetate esterase activity              | 0.13 | 1  | 0.4854369 | 24   | 0.06931008  |
| 31393 | GO:0080016    | (-)-E-beta-caryophyllene synthase activity             | 0.14 | 1  | 0.4854369 | 25   | 0.072197996 |
| 31394 | GO:0080017    | alpha-humulene synthase activity                       | 0.14 | 1  | 0.4854369 | 25   | 0.072197996 |
| 17147 | GO:0034768    | (E)-beta-ocimene synthase activity                     | 0.14 | 1  | 0.4854369 | 26   | 0.075085916 |
| 12533 | GO:0022838    | substrate-specific channel activity                    | 0.15 | 3  | 1.4563106 | 221  | 0.63823026  |
| 25098 | GO:0050794 GO | regulation of cellular process                         | 0.15 | 29 | 14.07767  | 3987 | 11.514136   |
| 9346  | GO:0016114    | terpenoid biosynthetic process                         | 0.15 | 1  | 0.4854369 | 27   | 0.077973835 |
| 9541  | GO:0016413    | O-acetyltransferase activity                           | 0.15 | 1  | 0.4854369 | 27   | 0.077973835 |
| 9816  | GO:0016762    | xyloglucan:xyloglucosyl transferase activity           | 0.15 | 1  | 0.4854369 | 27   | 0.077973835 |
| 8660  | GO:0015267 GO | channel activity                                       | 0.15 | 3  | 1.4563106 | 226  | 0.6526699   |
| 12515 | GO:0022803    | passive transmembrane transporter activity             | 0.15 | 3  | 1.4563106 | 226  | 0.6526699   |
| 3812  | GO:0005355 GO | glucose transmembrane transporter activity             | 0.15 | 1  | 0.4854369 | 28   | 0.080861755 |
| 6438  | GO:0009069    | serine family amino acid metabolic process             | 0.15 | 1  | 0.4854369 | 28   | 0.080861755 |
| 9027  | GO:0015758    | glucose transport                                      | 0.15 | 1  | 0.4854369 | 28   | 0.080861755 |
| 24966 | GO:0050660    | flavin adenine dinucleotide binding                    | 0.16 | 2  | 0.9708738 | 118  | 0.34077454  |
| 31895 | GO:0090304    | nucleic acid metabolic process                         | 0.16 | 18 | 8.7378645 | 2340 | 6.7577324   |
| 4841  | GO:0006721    | terpenoid metabolic process                            | 0.16 | 1  | 0.4854369 | 29   | 0.083749674 |
| 7558  | GO:0010334    | sesquiterpene synthase activity                        | 0.16 | 1  | 0.4854369 | 29   | 0.083749674 |
| 23    | GO:0000030    | mannosyltransferase activity                           | 0.16 | 1  | 0.4854369 | 30   | 0.086637594 |
| 3877  | GO:0005516    | calmodulin binding                                     | 0.17 | 3  | 1.4563106 | 236  | 0.6815491   |
| 7222  | GO:0009975    | cyclase activity                                       | 0.17 | 1  | 0.4854369 | 31   | 0.08952551  |
| 11202 | GO:0019199    | transmembrane receptor protein kinase activity         | 0.18 | 5  | 2.4271846 | 504  | 1.4555116   |
| 6072  | GO:0008645    | hexose transport                                       | 0.18 | 1  | 0.4854369 | 34   | 0.09818927  |
| 8562  | GO:0015149    | hexose transmembrane transporter activity              | 0.18 | 1  | 0.4854369 | 34   | 0.09818927  |
| 17794 | GO:0035428    | hexose transmembrane transport                         | 0.18 | 1  | 0.4854369 | 34   | 0.09818927  |
| 3749  | GO:0005249    | voltage-gated potassium channel activity               | 0.18 | 1  | 0.4854369 | 34   | 0.09818927  |
| 6355  | GO:0008970    | phospholipase A1 activity                              | 0.19 | 1  | 0.4854369 | 35   | 0.10107719  |
| 23199 | GO:0047714    | galactolipase activity                                 | 0.19 | 1  | 0.4854369 | 35   | 0.10107719  |
| 12805 | GO:0030246    | carbohydrate binding                                   | 0.19 | 3  | 1.4563106 | 251  | 0.7248679   |
| 4232  | GO:0005992    | trehalose biosynthetic process                         | 0.19 | 1  | 0.4854369 | 36   | 0.10396511  |
| 9393  | GO:0016165    | lipoxygenase activity                                  | 0.19 | 1  | 0.4854369 | 36   | 0.10396511  |
| 3801  | GO:0005342    | organic acid transmembrane transporter activity        | 0.19 | 2  | 0.9708738 | 136  | 0.3927571   |
| 22444 | GO:0046943    | carboxylic acid transmembrane transporter activity     | 0.19 | 2  | 0.9708738 | 136  | 0.3927571   |
| 8980  | GO:0015711    | organic anion transport                                | 0.20 | 1  | 0.4854369 | 37   | 0.10685303  |
| 3758  | GO:0005267    | potassium channel activity                             | 0.20 | 1  | 0.4854369 | 37   | 0.10685303  |
| 4942  | GO:0006855    | drug transmembrane transport                           | 0.20 | 2  | 0.9708738 | 139  | 0.40142086  |
| 8607  | GO:0015197 GO | peptide transporter activity                           | 0.20 | 2  | 0.9708738 | 139  | 0.40142086  |
| 8608  | GO:0015198    | oligopeptide transporter activity                      | 0.20 | 2  | 0.9708738 | 139  | 0.40142086  |
| 8642  | GO:0015238 GO | drug transmembrane transporter activity                | 0.20 | 2  | 0.9708738 | 139  | 0.40142086  |
| 9154  | GO:0015893    | drug transport                                         | 0.20 | 2  | 0.9708738 | 139  | 0.40142086  |
| 18832 | GO:0042493 GO | response to drug                                       | 0.20 | 2  | 0.9708738 | 139  | 0.40142086  |
| 4231  | GO:0005991    | trehalose metabolic process                            | 0.20 | 1  | 0.4854369 | 38   | 0.10974095  |
| 12538 | GO:0022843    | voltage-gated cation channel activity                  | 0.20 | 1  | 0.4854369 | 38   | 0.10974095  |
| 9796  | GO:0016741    | transferase activity, transferring one-carbon groups   | 0.20 | 3  | 1.4563106 | 261  | 0.7537471   |
| 9837  | GO:0016788    | hydrolase activity, acting on ester bonds              | 0.20 | 12 | 5.8252425 | 1534 | 4.430069    |
| 4944  | GO:0006857    | oligopeptide transport                                 | 0.20 | 2  | 0.9708738 | 141  | 0.4071967   |
| 9099  | GO:0015833    | peptide transport                                      | 0.20 | 2  | 0.9708738 | 141  | 0.4071967   |
| 9699  | GO:0016616    | oxidoreductase activity, acting on the CH-OH group     | 0.21 | 3  | 1.4563106 | 266  | 0.7681867   |
| 5891  | GO:0008395 GO | steroid hydroxylase activity                           | 0.21 | 1  | 0.4854369 | 40   | 0.1155168   |
| 12794 | GO:0030234    | enzyme regulator activity                              | 0.22 | 4  | 1.9417475 | 403  | 1.1638317   |
| 4874  | GO:0006767    | water-soluble vitamin metabolic process                | 0.22 | 1  | 0.4854369 | 42   | 0.121292636 |
| 5607  | GO:0008022    | protein C-terminus binding                             | 0.22 | 1  | 0.4854369 | 42   | 0.121292636 |
| 6666  | GO:0009312    | oligosaccharide biosynthetic process                   | 0.22 | 1  | 0.4854369 | 42   | 0.121292636 |
| 8461  | GO:0015020 GO | glucuronosyltransferase activity                       | 0.22 | 1  | 0.4854369 | 42   | 0.121292636 |
| 9370  | GO:0016138    | glycoside biosynthetic process                         | 0.22 | 1  | 0.4854369 | 42   | 0.121292636 |
| 18713 | GO:0042364    | water-soluble vitamin biosynthetic process             | 0.22 | 1  | 0.4854369 | 42   | 0.121292636 |
| 21880 | GO:0046351    | disaccharide biosynthetic process                      | 0.22 | 1  | 0.4854369 | 42   | 0.121292636 |
| 8679  | GO:0015297    | antiporter activity                                    | 0.23 | 2  | 0.9708738 | 152  | 0.4389638   |
| 8682  | GO:0015300    | solute:solute antiporter activity                      | 0.23 | 2  | 0.9708738 | 152  | 0.4389638   |
| 16603 | GO:0034220    | ion transmembrane transport                            | 0.23 | 7  | 3.3980582 | 833  | 2.4056373   |
| 4873  | GO:0006766    | vitamin metabolic process                              | 0.23 | 1  | 0.4854369 | 44   | 0.12706847  |
| 6477  | GO:0009110    | vitamin biosynthetic process                           | 0.23 | 1  | 0.4854369 | 44   | 0.12706847  |
| 20522 | GO:0044272    | sulfur compound biosynthetic process                   | 0.23 | 1  | 0.4854369 | 44   | 0.12706847  |
| 6424  | GO:0009055 GO | electron carrier activity                              | 0.23 | 2  | 0.9708738 | 154  | 0.44473964  |
| 9114  | GO:0015849    | organic acid transport                                 | 0.24 | 2  | 0.9708738 | 156  | 0.45051548  |
| 22443 | GO:0046942    | carboxylic acid transport                              | 0.24 | 2  | 0.9708738 | 156  | 0.45051548  |
| 4215  | GO:0005975    | carbohydrate metabolic process                         | 0.24 | 8  | 3.883495  | 990  | 2.8590407   |
| 19831 | GO:0043565    | sequence-specific DNA binding                          | 0.24 | 2  | 0.9708738 | 159  | 0.45917925  |
| 6750  | GO:0009415    | response to water                                      | 0.25 | 1  | 0.4854369 | 49   | 0.14150807  |
| 3756  | GO:0005261 GO | cation channel activity                                | 0.25 | 1  | 0.4854369 | 49   | 0.14150807  |
| 3490  | GO:0004888 GO | transmembrane receptor activity                        | 0.25 | 5  | 2.4271846 | 571  | 1.6490022   |
| 5096  | GO:0007047    | cellular cell wall organization                        | 0.26 | 1  | 0.4854369 | 50   | 0.14439599  |
| 6932  | GO:0009664    | plant-type cell wall organization                      | 0.26 | 1  | 0.4854369 | 50   | 0.14439599  |
| 20857 | GO:0045229    | external encapsulating structure organization          | 0.26 | 1  | 0.4854369 | 50   | 0.14439599  |
| 30033 | GO:0071669    | plant-type cell wall organization or biogenesis        | 0.26 | 1  | 0.4854369 | 50   | 0.14439599  |
| 7173  | GO:0009922    | fatty acid elongase activity                           | 0.26 | 1  | 0.4854369 | 51   | 0.14728391  |
| 4915  | GO:0006817    | phosphate transport                                    | 0.27 | 1  | 0.4854369 | 52   | 0.15017183  |
| 8528  | GO:0015114    | phosphate transmembrane transporter activity           | 0.27 | 1  | 0.4854369 | 52   | 0.15017183  |
| 17801 | GO:0035435    | phosphate transmembrane transport                      | 0.27 | 1  | 0.4854369 | 52   | 0.15017183  |
| 2809  | GO:0003993    | acid phosphatase activity                              | 0.27 | 1  | 0.4854369 | 52   | 0.15017183  |
| 12547 | GO:0022857 GO | transmembrane transporter activity                     | 0.27 | 11 | 5.3398056 | 1483 | 4.282785    |
| 29246 | GO:0070882    | cellular cell wall organization or biogenesis          | 0.27 | 1  | 0.4854369 | 53   | 0.15305975  |
| 9768  | GO:0016706    | oxidoreductase activity, acting on paired donors, wi   | 0.28 | 2  | 0.9708738 | 175  | 0.505386    |



|       |            |                                                                                                                  |      |    |           |      |            |
|-------|------------|------------------------------------------------------------------------------------------------------------------|------|----|-----------|------|------------|
| 4894  | GO:0006790 | sulfur compound metabolic process                                                                                | 0.28 | 1  | 0.4854369 | 55   | 0.15883559 |
| 4224  | GO:0005984 | disaccharide metabolic process                                                                                   | 0.28 | 1  | 0.4854369 | 56   | 0.16172351 |
| 9369  | GO:0016137 | glycoside metabolic process                                                                                      | 0.28 | 1  | 0.4854369 | 56   | 0.16172351 |
| 13082 | GO:0030599 | pectinesterase activity                                                                                          | 0.29 | 2  | 0.9708738 | 178  | 0.5140497  |
| 9813  | GO:0016759 | cellulose synthase activity                                                                                      | 0.29 | 1  | 0.4854369 | 57   | 0.16461143 |
| 6166  | GO:0008757 | S-adenosylmethionine-dependent methyltransferase activity                                                        | 0.29 | 2  | 0.9708738 | 180  | 0.5198256  |
| 5819  | GO:0008299 | isoprenoid biosynthetic process                                                                                  | 0.29 | 1  | 0.4854369 | 58   | 0.16749935 |
| 6665  | GO:0009311 | oligosaccharide metabolic process                                                                                | 0.29 | 1  | 0.4854369 | 58   | 0.16749935 |
| 8558  | GO:0015145 | monosaccharide transmembrane transporter activity                                                                | 0.29 | 1  | 0.4854369 | 58   | 0.16749935 |
| 9018  | GO:0015749 | monosaccharide transport                                                                                         | 0.29 | 1  | 0.4854369 | 58   | 0.16749935 |
| 29919 | GO:0071555 | cell wall organization                                                                                           | 0.29 | 1  | 0.4854369 | 58   | 0.16749935 |
| 2831  | GO:0004022 | alcohol dehydrogenase (NAD) activity                                                                             | 0.30 | 1  | 0.4854369 | 59   | 0.17038727 |
| 4840  | GO:0006720 | isoprenoid metabolic process                                                                                     | 0.30 | 1  | 0.4854369 | 60   | 0.17327519 |
| 14811 | GO:0032403 | protein complex binding                                                                                          | 0.30 | 1  | 0.4854369 | 60   | 0.17327519 |
| 9818  | GO:0016765 | transferase activity, transferring alkyl or aryl (other than methyl) groups                                      | 0.30 | 2  | 0.9708738 | 185  | 0.53426516 |
| 6018  | GO:0008559 | xenobiotic-transporting ATPase activity                                                                          | 0.31 | 1  | 0.4854369 | 62   | 0.17905103 |
| 19225 | GO:0042908 | xenobiotic transport                                                                                             | 0.31 | 1  | 0.4854369 | 62   | 0.17905103 |
| 19227 | GO:0042910 | xenobiotic transporter activity                                                                                  | 0.31 | 1  | 0.4854369 | 62   | 0.17905103 |
| 18582 | GO:0042221 | response to chemical stimulus                                                                                    | 0.31 | 3  | 1.4563106 | 328  | 0.94723773 |
| 17016 | GO:0034637 | cellular carbohydrate biosynthetic process                                                                       | 0.31 | 1  | 0.4854369 | 63   | 0.18193895 |
| 26931 | GO:0055085 | transmembrane transport                                                                                          | 0.32 | 11 | 5.3398056 | 1548 | 4.4705     |
| 9293  | GO:0016051 | carbohydrate biosynthetic process                                                                                | 0.32 | 1  | 0.4854369 | 64   | 0.18482687 |
| 25095 | GO:0050790 | regulation of catalytic activity                                                                                 | 0.32 | 4  | 1.9417475 | 480  | 1.3862015  |
| 12573 | GO:0022891 | substrate-specific transmembrane transporter activity                                                            | 0.32 | 9  | 4.3689322 | 1241 | 3.5839086  |
| 28366 | GO:0065009 | regulation of molecular function                                                                                 | 0.33 | 4  | 1.9417475 | 484  | 1.3977532  |
| 9765  | GO:0016702 | oxidoreductase activity, acting on single donors with NAD, NADP, or ferredoxin as oxidant, and oxygen as oxidant | 0.33 | 1  | 0.4854369 | 66   | 0.1906027  |
| 2999  | GO:0004312 | fatty acid synthase activity                                                                                     | 0.33 | 1  | 0.4854369 | 68   | 0.19637854 |
| 21710 | GO:0046148 | pigment biosynthetic process                                                                                     | 0.34 | 1  | 0.4854369 | 69   | 0.19926646 |
| 31420 | GO:0080043 | quercetin 3-O-glucosyltransferase activity                                                                       | 0.34 | 1  | 0.4854369 | 69   | 0.19926646 |
| 4910  | GO:0006811 | ion transport                                                                                                    | 0.35 | 7  | 3.3980582 | 959  | 2.769515   |
| 9812  | GO:0016758 | transferase activity, transferring hexosyl groups                                                                | 0.35 | 4  | 1.9417475 | 501  | 1.4468478  |
| 12528 | GO:0022832 | voltage-gated channel activity                                                                                   | 0.35 | 1  | 0.4854369 | 72   | 0.20793022 |
| 15280 | GO:0032879 | regulation of localization                                                                                       | 0.35 | 1  | 0.4854369 | 72   | 0.20793022 |
| 17141 | GO:0034762 | regulation of transmembrane transport                                                                            | 0.35 | 1  | 0.4854369 | 72   | 0.20793022 |
| 17144 | GO:0034765 | regulation of ion transmembrane transport                                                                        | 0.35 | 1  | 0.4854369 | 72   | 0.20793022 |
| 19568 | GO:0043269 | regulation of ion transport                                                                                      | 0.35 | 1  | 0.4854369 | 72   | 0.20793022 |
| 25348 | GO:0051049 | regulation of transport                                                                                          | 0.35 | 1  | 0.4854369 | 72   | 0.20793022 |
| 3744  | GO:0005244 | voltage-gated ion channel activity                                                                               | 0.35 | 1  | 0.4854369 | 72   | 0.20793022 |
| 9703  | GO:0016620 | oxidoreductase activity, acting on the aldehyde or alcohol group of substrates                                   | 0.35 | 1  | 0.4854369 | 73   | 0.21081814 |
| 18786 | GO:0042440 | pigment metabolic process                                                                                        | 0.35 | 1  | 0.4854369 | 73   | 0.21081814 |
| 25510 | GO:0051213 | dioxygenase activity                                                                                             | 0.36 | 1  | 0.4854369 | 75   | 0.21659398 |
| 3627  | GO:0005085 | guanyl-nucleotide exchange factor activity                                                                       | 0.36 | 1  | 0.4854369 | 75   | 0.21659398 |
| 8494  | GO:0015075 | ion transmembrane transporter activity                                                                           | 0.37 | 6  | 2.9126213 | 827  | 2.3883097  |
| 3476  | GO:0004872 | receptor activity                                                                                                | 0.37 | 5  | 2.4271846 | 672  | 1.9406822  |
| 12574 | GO:0022892 | substrate-specific transporter activity                                                                          | 0.37 | 10 | 4.854369  | 1463 | 4.2250266  |
| 15189 | GO:0032787 | monocarboxylic acid metabolic process                                                                            | 0.38 | 1  | 0.4854369 | 81   | 0.23392151 |
| 30066 | GO:0071702 | organic substance transport                                                                                      | 0.39 | 4  | 1.9417475 | 529  | 1.5277096  |
| 4912  | GO:0006813 | potassium ion transport                                                                                          | 0.39 | 1  | 0.4854369 | 84   | 0.24258527 |
| 30168 | GO:0071804 | cellular potassium ion transport                                                                                 | 0.39 | 1  | 0.4854369 | 84   | 0.24258527 |
| 30169 | GO:0071805 | potassium ion transmembrane transport                                                                            | 0.39 | 1  | 0.4854369 | 84   | 0.24258527 |
| 19125 | GO:0042802 | identical protein binding                                                                                        | 0.40 | 5  | 2.4271846 | 697  | 2.01288    |
| 21331 | GO:0045735 | nutrient reservoir activity                                                                                      | 0.41 | 1  | 0.4854369 | 89   | 0.25702485 |
| 3723  | GO:0005215 | transporter activity                                                                                             | 0.42 | 12 | 5.8252425 | 1844 | 5.325324   |
| 3644  | GO:0005102 | receptor binding                                                                                                 | 0.42 | 1  | 0.4854369 | 91   | 0.2628007  |
| 5712  | GO:0008168 | methyltransferase activity                                                                                       | 0.43 | 2  | 0.9708738 | 244  | 0.7046524  |
| 11712 | GO:0019748 | secondary metabolic process                                                                                      | 0.43 | 1  | 0.4854369 | 95   | 0.27435237 |
| 20512 | GO:0044262 | cellular carbohydrate metabolic process                                                                          | 0.43 | 2  | 0.9708738 | 248  | 0.7162041  |
| 2628  | GO:0003677 | DNA binding                                                                                                      | 0.44 | 8  | 3.883495  | 1224 | 3.534814   |
| 25195 | GO:0050896 | response to stimulus                                                                                             | 0.44 | 12 | 5.8252425 | 1881 | 5.432177   |
| 3306  | GO:0004674 | protein serine/threonine kinase activity                                                                         | 0.45 | 7  | 3.3980582 | 1062 | 3.0669708  |
| 5874  | GO:0008374 | O-acyltransferase activity                                                                                       | 0.46 | 1  | 0.4854369 | 102  | 0.29456782 |
| 19126 | GO:0042803 | protein homodimerization activity                                                                                | 0.47 | 2  | 0.9708738 | 265  | 0.7652988  |
| 22049 | GO:0046527 | glucosyltransferase activity                                                                                     | 0.48 | 2  | 0.9708738 | 270  | 0.77973837 |
| 3626  | GO:0005083 | small GTPase regulator activity                                                                                  | 0.48 | 1  | 0.4854369 | 111  | 0.3205591  |
| 5070  | GO:0007017 | microtubule-based process                                                                                        | 0.49 | 1  | 0.4854369 | 112  | 0.32344702 |
| 5071  | GO:0007018 | microtubule-based movement                                                                                       | 0.49 | 1  | 0.4854369 | 112  | 0.32344702 |
| 29918 | GO:0071554 | cell wall organization or biogenesis                                                                             | 0.49 | 1  | 0.4854369 | 112  | 0.32344702 |
| 9933  | GO:0016903 | oxidoreductase activity, acting on the aldehyde or alcohol group of substrates                                   | 0.49 | 1  | 0.4854369 | 113  | 0.32633495 |
| 4357  | GO:0006139 | nucleobase, nucleoside, nucleotide and nucleic acid metabolic process                                            | 0.49 | 20 | 9.708738  | 3285 | 9.486816   |
| 22478 | GO:0046982 | protein heterodimerization activity                                                                              | 0.49 | 1  | 0.4854369 | 114  | 0.32922286 |
| 3874  | GO:0005509 | calcium ion binding                                                                                              | 0.50 | 2  | 0.9708738 | 279  | 0.8057296  |
| 9535  | GO:0016407 | acetyltransferase activity                                                                                       | 0.50 | 1  | 0.4854369 | 115  | 0.3321108  |
| 20531 | GO:0044281 | small molecule metabolic process                                                                                 | 0.50 | 11 | 5.3398056 | 1788 | 5.1636004  |
| 27063 | GO:0060089 | molecular transducer activity                                                                                    | 0.50 | 5  | 2.4271846 | 787  | 2.2727928  |
| 3475  | GO:0004871 | signal transducer activity                                                                                       | 0.50 | 5  | 2.4271846 | 787  | 2.2727928  |
| 25416 | GO:0051119 | sugar transmembrane transporter activity                                                                         | 0.51 | 1  | 0.4854369 | 118  | 0.34077454 |
| 14667 | GO:0032259 | methylation                                                                                                      | 0.51 | 2  | 0.9708738 | 285  | 0.8230572  |
| 22375 | GO:0046872 | metal ion binding                                                                                                | 0.51 | 18 | 8.7378645 | 2985 | 8.6204405  |
| 12532 | GO:0022836 | gated channel activity                                                                                           | 0.52 | 1  | 0.4854369 | 122  | 0.3523262  |
| 19470 | GO:0043167 | ion binding                                                                                                      | 0.52 | 18 | 8.7378645 | 2997 | 8.655096   |
| 19472 | GO:0043169 | cation binding                                                                                                   | 0.52 | 18 | 8.7378645 | 2997 | 8.655096   |
| 3260  | GO:0004620 | phospholipase activity                                                                                           | 0.52 | 1  | 0.4854369 | 123  | 0.35521415 |
| 17020 | GO:0034641 | cellular nitrogen compound metabolic process                                                                     | 0.52 | 22 | 10.679611 | 3678 | 10.621769  |
| 12741 | GO:0030170 | pyridoxal phosphate binding                                                                                      | 0.53 | 1  | 0.4854369 | 126  | 0.3638779  |
| 28643 | GO:0070279 | vitamin B6 binding                                                                                               | 0.53 | 1  | 0.4854369 | 126  | 0.3638779  |
| 4906  | GO:0006807 | nitrogen compound metabolic process                                                                              | 0.55 | 22 | 10.679611 | 3725 | 10.757502  |
| 3724  | GO:0005216 | ion channel activity                                                                                             | 0.57 | 1  | 0.4854369 | 140  | 0.40430877 |
| 6046  | GO:0008610 | lipid biosynthetic process                                                                                       | 0.57 | 1  | 0.4854369 | 141  | 0.4071967  |
| 13164 | GO:0030695 | GTPase regulator activity                                                                                        | 0.57 | 1  | 0.4854369 | 142  | 0.4100846  |
| 8557  | GO:0015144 | carbohydrate transmembrane transporter activity                                                                  | 0.57 | 1  | 0.4854369 | 143  | 0.41297254 |
| 16602 | GO:0034219 | carbohydrate transmembrane transport                                                                             | 0.57 | 1  | 0.4854369 | 143  | 0.41297254 |
| 4849  | GO:0006730 | one-carbon metabolic process                                                                                     | 0.58 | 2  | 0.9708738 | 325  | 0.93857396 |

|       |               |                                                       |      |    |           |       |            |
|-------|---------------|-------------------------------------------------------|------|----|-----------|-------|------------|
| 3873  | GO:0005507    | copper ion binding                                    | 0.58 | 1  | 0.4854369 | 146   | 0.42163628 |
| 6071  | GO:0008643 GO | carbohydrate transport                                | 0.58 | 1  | 0.4854369 | 147   | 0.42452422 |
| 5909  | GO:0008415    | acyltransferase activity                              | 0.59 | 2  | 0.9708738 | 330   | 0.95301354 |
| 22415 | GO:0046914    | transition metal ion binding                          | 0.59 | 15 | 7.2815533 | 2599  | 7.5057034  |
| 11426 | GO:0019438    | aromatic compound biosynthetic process                | 0.59 | 1  | 0.4854369 | 149   | 0.43030006 |
| 27562 | GO:0060589    | nucleoside-triphosphatase regulator activity          | 0.60 | 1  | 0.4854369 | 152   | 0.4389638  |
| 4909  | GO:0006810 GO | transport                                             | 0.63 | 13 | 6.3106794 | 2315  | 6.6855345  |
| 25529 | GO:0051234    | establishment of localization                         | 0.63 | 13 | 6.3106794 | 2315  | 6.6855345  |
| 25476 | GO:0051179    | localization                                          | 0.63 | 13 | 6.3106794 | 2319  | 6.697086   |
| 9811  | GO:0016757 GO | transferase activity, transferring glycosyl groups    | 0.63 | 4  | 1.9417475 | 729   | 2.1052935  |
| 6899  | GO:0009628    | response to abiotic stimulus                          | 0.64 | 1  | 0.4854369 | 170   | 0.49094638 |
| 3341  | GO:0004722 GO | protein serine/threonine phosphatase activity         | 0.64 | 1  | 0.4854369 | 171   | 0.4938343  |
| 3307  | GO:0004675    | transmembrane receptor protein serine/threonine k     | 0.64 | 2  | 0.9708738 | 367   | 1.0598665  |
| 11787 | GO:0019842    | vitamin binding                                       | 0.65 | 1  | 0.4854369 | 177   | 0.5111618  |
| 9839  | GO:0016791 GO | phosphatase activity                                  | 0.67 | 2  | 0.9708738 | 383   | 1.1060733  |
| 20505 | GO:0044255    | cellular lipid metabolic process                      | 0.67 | 1  | 0.4854369 | 184   | 0.53137726 |
| 4844  | GO:0006725    | cellular aromatic compound metabolic process          | 0.67 | 1  | 0.4854369 | 185   | 0.53426516 |
| 5195  | GO:0007165 GO | signal transduction                                   | 0.68 | 5  | 2.4271846 | 961   | 2.775291   |
| 12602 | GO:0023052 GO | signaling                                             | 0.68 | 5  | 2.4271846 | 961   | 2.775291   |
| 3304  | GO:0004672 GO | protein kinase activity                               | 0.68 | 7  | 3.3980582 | 1333  | 3.8495972  |
| 9906  | GO:0016874    | ligase activity                                       | 0.69 | 3  | 1.4563106 | 597   | 1.7240882  |
| 10244 | GO:0018130    | heterocycle biosynthetic process                      | 0.70 | 1  | 0.4854369 | 199   | 0.57469606 |
| 3340  | GO:0004721    | phosphoprotein phosphatase activity                   | 0.70 | 1  | 0.4854369 | 199   | 0.57469606 |
| 8673  | GO:0015291 GO | secondary active transmembrane transporter activi     | 0.70 | 2  | 0.9708738 | 407   | 1.1753833  |
| 4954  | GO:0006869    | lipid transport                                       | 0.71 | 1  | 0.4854369 | 208   | 0.6006873  |
| 8085  | GO:0010876    | lipid localization                                    | 0.71 | 1  | 0.4854369 | 208   | 0.6006873  |
| 18956 | GO:0042626    | ATPase activity, coupled to transmembrane movem       | 0.72 | 1  | 0.4854369 | 211   | 0.6093511  |
| 9861  | GO:0016820    | hydrolase activity, acting on acid anhydrides, cataly | 0.72 | 1  | 0.4854369 | 212   | 0.612239   |
| 9494  | GO:0016311    | dephosphorylation                                     | 0.72 | 2  | 0.9708738 | 425   | 1.227366   |
| 17617 | GO:0035251    | UDP-glucosyltransferase activity                      | 0.73 | 1  | 0.4854369 | 218   | 0.62956655 |
| 18912 | GO:0042578    | phosphoric ester hydrolase activity                   | 0.74 | 2  | 0.9708738 | 444   | 1.282365   |
| 19758 | GO:0043492    | ATPase activity, coupled to movement of substance     | 0.76 | 1  | 0.4854369 | 235   | 0.67866117 |
| 3885  | GO:0005525    | GTP binding                                           | 0.77 | 1  | 0.4854369 | 245   | 0.70754033 |
| 11032 | GO:0019001    | guanyl nucleotide binding                             | 0.77 | 1  | 0.4854369 | 245   | 0.70754033 |
| 14967 | GO:0032561    | guanyl ribonucleotide binding                         | 0.77 | 1  | 0.4854369 | 245   | 0.70754033 |
| 9824  | GO:0016773    | phosphotransferase activity, alcohol group as acce    | 0.79 | 7  | 3.3980582 | 1493  | 4.311664   |
| 8749  | GO:0015399    | primary active transmembrane transporter activity     | 0.79 | 1  | 0.4854369 | 260   | 0.75085914 |
| 8753  | GO:0015405    | P-P-bond-hydrolysis-driven transmembrane transpo      | 0.79 | 1  | 0.4854369 | 260   | 0.75085914 |
| 9285  | GO:0016043    | cellular component organization                       | 0.79 | 1  | 0.4854369 | 261   | 0.75374711 |
| 4649  | GO:0006520 GO | cellular amino acid metabolic process                 | 0.81 | 1  | 0.4854369 | 277   | 0.7999538  |
| 25998 | GO:0051716    | cellular response to stimulus                         | 0.81 | 5  | 2.4271846 | 1138  | 3.2864528  |
| 30205 | GO:0071841    | cellular component organization or biogenesis at ce   | 0.82 | 1  | 0.4854369 | 285   | 0.8230572  |
| 20356 | GO:0044106    | cellular amine metabolic process                      | 0.84 | 1  | 0.4854369 | 303   | 0.8750397  |
| 9889  | GO:0016853    | isomerase activity                                    | 0.84 | 1  | 0.4854369 | 306   | 0.8837035  |
| 6662  | GO:0009308    | amine metabolic process                               | 0.85 | 1  | 0.4854369 | 314   | 0.9068068  |
| 12516 | GO:0022804    | active transmembrane transporter activity             | 0.85 | 3  | 1.4563106 | 787   | 2.2727928  |
| 2975  | GO:0004175 GO | endopeptidase activity                                | 0.85 | 1  | 0.4854369 | 320   | 0.9241344  |
| 9836  | GO:0016787    | hydrolase activity                                    | 0.85 | 18 | 8.7378645 | 3723  | 10.751725  |
| 5732  | GO:0008194    | UDP-glycosyltransferase activity                      | 0.85 | 1  | 0.4854369 | 322   | 0.9299102  |
| 3955  | GO:0005634    | nucleus                                               | 0.86 | 6  | 2.9126213 | 1433  | 4.138389   |
| 20488 | GO:0044238    | primary metabolic process                             | 0.87 | 48 | 23.30097  | 9167  | 26.47356   |
| 20533 | GO:0044283    | small molecule biosynthetic process                   | 0.88 | 1  | 0.4854369 | 347   | 1.0021082  |
| 20487 | GO:0044237    | cellular metabolic process                            | 0.88 | 42 | 20.38835  | 8185  | 23.637625  |
| 30204 | GO:0071840    | cellular component organization or biogenesis         | 0.89 | 1  | 0.4854369 | 362   | 1.045427   |
| 20521 | GO:0044271    | cellular nitrogen compound biosynthetic process       | 0.89 | 1  | 0.4854369 | 367   | 1.0598665  |
| 12608 | GO:0030001    | metal ion transport                                   | 0.89 | 1  | 0.4854369 | 374   | 1.080082   |
| 4408  | GO:0006200    | ATP catabolic process                                 | 0.90 | 2  | 0.9708738 | 641   | 1.8511566  |
| 9918  | GO:0016887 GO | ATPase activity                                       | 0.90 | 2  | 0.9708738 | 641   | 1.8511566  |
| 21600 | GO:0046034    | ATP metabolic process                                 | 0.90 | 2  | 0.9708738 | 641   | 1.8511566  |
| 9488  | GO:0016301    | kinase activity                                       | 0.90 | 7  | 3.3980582 | 1740  | 5.0249805  |
| 8943  | GO:0015672    | monovalent inorganic cation transport                 | 0.90 | 1  | 0.4854369 | 383   | 1.1060733  |
| 20510 | GO:0044260 GO | cellular macromolecule metabolic process              | 0.90 | 27 | 13.106796 | 5577  | 16.105928  |
| 9913  | GO:0016881    | acid-amino acid ligase activity                       | 0.90 | 1  | 0.4854369 | 391   | 1.1291766  |
| 15436 | GO:0033036    | macromolecule localization                            | 0.91 | 1  | 0.4854369 | 397   | 1.1465042  |
| 9845  | GO:0016798    | hydrolase activity, acting on glycosyl bonds          | 0.91 | 1  | 0.4854369 | 401   | 1.1580559  |
| 4612  | GO:0006468    | protein phosphorylation                               | 0.91 | 9  | 4.3689322 | 2205  | 6.367863   |
| 9579  | GO:0016462    | pyrophosphatase activity                              | 0.93 | 3  | 1.4563106 | 954   | 2.750755   |
| 9859  | GO:0016818    | hydrolase activity, acting on acid anhydrides, in pho | 0.93 | 3  | 1.4563106 | 956   | 2.7608514  |
| 9858  | GO:0016817    | hydrolase activity, acting on acid anhydrides         | 0.93 | 3  | 1.4563106 | 959   | 2.769515   |
| 7229  | GO:0009987 GO | cellular process                                      | 0.93 | 54 | 26.213593 | 10601 | 30.614838  |
| 4641  | GO:0006508    | proteolysis                                           | 0.93 | 3  | 1.4563106 | 965   | 2.7868426  |
| 9911  | GO:0016879    | ligase activity, forming carbon-nitrogen bonds        | 0.94 | 1  | 0.4854369 | 456   | 1.3168914  |
| 3876  | GO:0005515 GO | protein binding                                       | 0.94 | 33 | 16.019417 | 6933  | 20.021948  |
| 9823  | GO:0016772    | transferase activity, transferring phosphorus-contain | 0.95 | 7  | 3.3980582 | 1932  | 5.579461   |
| 4405  | GO:0006195    | purine nucleotide catabolic process                   | 0.95 | 2  | 0.9708738 | 773   | 2.232362   |
| 6508  | GO:0009143    | nucleoside triphosphate catabolic process             | 0.95 | 2  | 0.9708738 | 773   | 2.232362   |
| 6509  | GO:0009144    | purine nucleoside triphosphate metabolic process      | 0.95 | 2  | 0.9708738 | 773   | 2.232362   |
| 6511  | GO:0009146    | purine nucleoside triphosphate catabolic process      | 0.95 | 2  | 0.9708738 | 773   | 2.232362   |
| 6519  | GO:0009154    | purine ribonucleotide catabolic process               | 0.95 | 2  | 0.9708738 | 773   | 2.232362   |
| 6530  | GO:0009166    | nucleotide catabolic process                          | 0.95 | 2  | 0.9708738 | 773   | 2.232362   |
| 6567  | GO:0009203    | ribonucleoside triphosphate catabolic process         | 0.95 | 2  | 0.9708738 | 773   | 2.232362   |
| 6569  | GO:0009205    | purine ribonucleoside triphosphate metabolic proces   | 0.95 | 2  | 0.9708738 | 773   | 2.232362   |
| 6571  | GO:0009207    | purine ribonucleoside triphosphate catabolic proces   | 0.95 | 2  | 0.9708738 | 773   | 2.232362   |
| 6624  | GO:0009261    | ribonucleotide catabolic process                      | 0.95 | 2  | 0.9708738 | 773   | 2.232362   |
| 17034 | GO:0034655    | nucleobase, nucleoside, nucleotide and nucleic acid   | 0.95 | 2  | 0.9708738 | 773   | 2.232362   |
| 17035 | GO:0034656    | nucleobase, nucleoside and nucleotide catabolic pr    | 0.95 | 2  | 0.9708738 | 773   | 2.232362   |
| 22209 | GO:0046700    | heterocycle catabolic process                         | 0.95 | 2  | 0.9708738 | 773   | 2.232362   |
| 30879 | GO:0072523    | purine-containing compound catabolic process          | 0.95 | 2  | 0.9708738 | 773   | 2.232362   |
| 20520 | GO:0044270    | cellular nitrogen compound catabolic process          | 0.95 | 2  | 0.9708738 | 777   | 2.2439137  |
| 6563  | GO:0009199    | ribonucleoside triphosphate metabolic process         | 0.95 | 2  | 0.9708738 | 790   | 2.2814567  |
| 6515  | GO:0009150    | purine ribonucleotide metabolic process               | 0.95 | 2  | 0.9708738 | 791   | 2.2843447  |
| 6506  | GO:0009141    | nucleoside triphosphate metabolic process             | 0.95 | 2  | 0.9708738 | 796   | 2.2987843  |



|       |               |                                                     |      |    |           |       |           |
|-------|---------------|-----------------------------------------------------|------|----|-----------|-------|-----------|
| 4373  | GO:0006163    | purine nucleotide metabolic process                 | 0.96 | 2  | 0.9708738 | 810   | 2.339215  |
| 6622  | GO:0009259 GO | ribonucleotide metabolic process                    | 0.96 | 2  | 0.9708738 | 812   | 2.344991  |
| 19473 | GO:0043170 GO | macromolecule metabolic process                     | 0.96 | 30 | 14.563107 | 6553  | 18.92454  |
| 30877 | GO:0072521    | purine-containing compound metabolic process        | 0.96 | 2  | 0.9708738 | 827   | 2.3883097 |
| 2627  | GO:0003676    | nucleic acid binding                                | 0.96 | 9  | 4.3689322 | 2453  | 7.0840673 |
| 22007 | GO:0046483    | heterocycle metabolic process                       | 0.96 | 3  | 1.4563106 | 1094  | 3.1593843 |
| 18953 | GO:0042623    | ATPase activity, coupled                            | 0.96 | 1  | 0.4854369 | 537   | 1.550813  |
| 28378 | GO:0070011    | peptidase activity, acting on L-amino acid peptides | 0.96 | 1  | 0.4854369 | 537   | 1.550813  |
| 5840  | GO:0008324    | cation transmembrane transporter activity           | 0.96 | 1  | 0.4854369 | 538   | 1.5537009 |
| 9267  | GO:0016021    | integral to membrane                                | 0.96 | 3  | 1.4563106 | 1103  | 3.1853757 |
| 20532 | GO:0044282    | small molecule catabolic process                    | 0.96 | 2  | 0.9708738 | 854   | 2.4662836 |
| 4897  | GO:0006793    | phosphorus metabolic process                        | 0.97 | 11 | 5.3398056 | 2925  | 8.4471655 |
| 4900  | GO:0006796    | phosphate metabolic process                         | 0.97 | 11 | 5.3398056 | 2925  | 8.4471655 |
| 9493  | GO:0016310    | phosphorylation                                     | 0.97 | 9  | 4.3689322 | 2504  | 7.2313514 |
| 5763  | GO:0008233    | peptidase activity                                  | 0.97 | 1  | 0.4854369 | 565   | 1.6316746 |
| 10058 | GO:0017111    | nucleoside-triphosphatase activity                  | 0.97 | 2  | 0.9708738 | 878   | 2.5355935 |
| 5791  | GO:0008270    | zinc ion binding                                    | 0.97 | 6  | 2.9126213 | 1880  | 5.4292893 |
| 20498 | GO:0044248    | cellular catabolic process                          | 0.97 | 2  | 0.9708738 | 894   | 2.5818002 |
| 3863  | GO:0005488    | binding                                             | 0.97 | 70 | 33.980583 | 13903 | 40.15075  |
| 4867  | GO:0006753    | nucleoside phosphate metabolic process              | 0.97 | 2  | 0.9708738 | 914   | 2.6395588 |
| 6484  | GO:0009117    | nucleotide metabolic process                        | 0.97 | 2  | 0.9708738 | 914   | 2.6395588 |
| 13656 | GO:0031224    | intrinsic to membrane                               | 0.97 | 3  | 1.4563106 | 1193  | 3.4452884 |
| 5018  | GO:0006950    | response to stress                                  | 0.97 | 1  | 0.4854369 | 611   | 1.764519  |
| 131   | GO:0000166    | nucleotide binding                                  | 0.98 | 3  | 1.4563106 | 1213  | 3.5030468 |
| 26932 | GO:0055086    | nucleobase, nucleoside and nucleotide metabolic p   | 0.98 | 2  | 0.9708738 | 944   | 2.7261963 |
| 4911  | GO:0006812 GO | cation transport                                    | 0.98 | 1  | 0.4854369 | 662   | 1.9118029 |
| 4609  | GO:0006464    | protein modification process                        | 0.99 | 9  | 4.3689322 | 2781  | 8.031305  |
| 6425  | GO:0009056    | catabolic process                                   | 0.99 | 2  | 0.9708738 | 1051  | 3.0352037 |
| 19526 | GO:0043227    | membrane-bounded organelle                          | 0.99 | 6  | 2.9126213 | 2142  | 6.185924  |
| 19530 | GO:0043231    | intracellular membrane-bounded organelle            | 0.99 | 6  | 2.9126213 | 2142  | 6.185924  |
| 9266  | GO:0016020    | membrane                                            | 0.99 | 13 | 6.3106794 | 3741  | 10.803708 |
| 18000 | GO:0035639    | purine ribonucleoside triphosphate binding          | 0.99 | 1  | 0.4854369 | 769   | 2.2208104 |
| 19684 | GO:0043412    | macromolecule modification                          | 0.99 | 9  | 4.3689322 | 2900  | 8.374968  |
| 14959 | GO:0032553    | ribonucleotide binding                              | 0.99 | 1  | 0.4854369 | 795   | 2.2958963 |
| 14961 | GO:0032555    | purine ribonucleotide binding                       | 0.99 | 1  | 0.4854369 | 795   | 2.2958963 |
| 10033 | GO:0017076    | purine nucleotide binding                           | 0.99 | 1  | 0.4854369 | 797   | 2.3016722 |
| 2653  | GO:0003723    | RNA binding                                         | 0.99 | 1  | 0.4854369 | 797   | 2.3016722 |
| 20619 | GO:0044425    | membrane part                                       | 0.99 | 3  | 1.4563106 | 1523  | 4.398302  |
| 20517 | GO:0044267    | cellular protein metabolic process                  | 1.00 | 9  | 4.3689322 | 3225  | 9.313541  |
| 11522 | GO:0019538 GO | protein metabolic process                           | 1.00 | 12 | 5.8252425 | 4134  | 11.938661 |
| 4027  | GO:0005737    | cytoplasm                                           | 1.00 | 3  | 1.4563106 | 2001  | 5.7787275 |
| 19525 | GO:0043226    | organelle                                           | 1.00 | 6  | 2.9126213 | 3013  | 8.701303  |
| 19528 | GO:0043229    | intracellular organelle                             | 1.00 | 6  | 2.9126213 | 3013  | 8.701303  |
| 20618 | GO:0044424    | intracellular part                                  | 1.00 | 9  | 4.3689322 | 3853  | 11.127155 |
| 3945  | GO:0005622    | intracellular                                       | 1.00 | 11 | 5.3398056 | 4751  | 13.720507 |
| 3946  | GO:0005623    | cell                                                | 1.00 | 24 | 11.650485 | 8227  | 23.758917 |
| 20657 | GO:0044464    | cell part                                           | 1.00 | 24 | 11.650485 | 8227  | 23.758917 |
| 3903  | GO:0005575 GO | cellular_component                                  | 1.00 | 24 | 11.650485 | 8515  | 24.590637 |
