# Supplementary material for: The Tomato Hybrid Proline-rich Protein regulates the abscission zone competence to respond to ethylene signals
Source: PubMed Central journal article supplement (PMC5981600; doi:10.1038/s41438-018-0033-2), 2018-06-01
Supplement: 41438_2018_33_MOESM3_ESM.pdf [file 41438_2018_33_MOESM3_ESM.pdf]

Table S3. Differentially regulated genes (up and down regulated) in the control compared with THyPRP silenced plants in FAZ at 4 h along with their expression values, fold changes, annotations, GO ids and terms.

Worksheet 2 & 3

| Set 2                |                  |          |      |                 |       |
|----------------------|------------------|----------|------|-----------------|-------|
| Line                 | Array            | Details  | Time | Treated vs. Con | Set   |
| Control - New Yorker | 254331010025_1_3 | 4h_3_AZ  | 4h   | Control         | Set 2 |
| Control - New Yorker | 254331010025_1_4 | 4h_4_AZ  | 4h   |                 |       |
| TAPG + TPRP          | 254331010034_1_3 | 4h_39_AZ | 4h   | Treated         |       |
| TAPG + TPRP          | 254331010034_1_4 | 4h_40_AZ | 4h   |                 |       |

Cut off used to filter up and down regulated genes

**Upregulated**

For filtering upregulation we consider flag should be Detected in the treated sample and can be Compromised or Detected in the control sample and fold>=0.8 in the individual replicates and fold>=1 in the Geomean of treated samples.

**Downregulated**

For filtering downregulation we consider flag can be Detected or Compromised in the treated sample and should be Detected in the control sample and fold<=-0.8 in the individual replicates and fold<=-1 in the Geomean of treated samples.

**Differentially Regulated Probes**

| Sample                                 | Up  | Down |
|----------------------------------------|-----|------|
| 4h_TPRP_AZ vs. 4h_Control_AZ_Sense     | 842 | 1064 |
| 4h_TPRP_AZ vs. 4h_Control_AZ_Antisense | 543 | 714  |

**Note:**

Fold change expression values are provided as logbase 2

**Flagging Criteria:**

Compromised: If the gProcessedSignal value is less than the background intensity  
 Detected: If the gProcessedSignal value is above background intensity

| Column Header    | Description                                                     |
|------------------|-----------------------------------------------------------------|
| ProbeName        | Unique probe identifier                                         |
| GeneName         | GeneSymbol                                                      |
| Fold             | Fold change calculated is log base 2                            |
| Flag             | Detected or Compromised                                         |
| GeomeanFold      | Average Fold change for the replicates calculated is log base 2 |
| p-Value          | t-test p- value                                                 |
| gProcessedSignal | Background subtracted signal intensity                          |

Worksheet 4 & 5

This file contains the fold change for all the spots in the array

**GO ID**

Gene Ontology ID

**GO ACCESSION**

Gene Ontology Function name

**p-value :**

The probability of obtaining the specified GO accession number from a list of random entities. Less the p-value more significant is the GO accession number.

**Significant pvalue<0.05**

**Count in Selection :**

This refers to the number of genes in the selected entity (for example, from T-test) list which have that particular GO term.

**%Count in Selection :**

This refers to the percentage of genes in the input entity list which have that GO term.

**Count in Total :**

This refers to the number of genes in All Entities which have that GO term.

**%Count in Total :**

This refers to the percentage of genes in the All Entities list which have that GO term.



































| GO ID | GO ACCESSION           | GO Term                                                                                                                        | p-value | Count in Selection | % Count in Selection | Count in Total | % Count in Total |
|-------|------------------------|--------------------------------------------------------------------------------------------------------------------------------|---------|--------------------|----------------------|----------------|------------------|
| 6201  | GO:0008794             | arsenate reductase (glutaredoxin)                                                                                              | 0.00    | 6                  | 1.8518518            | 20             | 0.0577584        |
| 13089 | GO:0030614             | oxidoreductase activity, acting on NADPH or NADH, reduced flavin mononucleotide, and reduced nicotinamide adenine dinucleotide | 0.00    | 6                  | 1.8518518            | 20             | 0.0577584        |
| 13088 | GO:0030613             | oxidoreductase activity, acting on NADPH or NADH, reduced flavin mononucleotide, and reduced nicotinamide adenine dinucleotide | 0.00    | 6                  | 1.8518518            | 20             | 0.0577584        |
| 13086 | GO:0030611             | arsenate reductase activity                                                                                                    | 0.00    | 6                  | 1.8518518            | 20             | 0.0577584        |
| 28364 | GO:0065007             | biological regulation                                                                                                          | 0.00    | 72                 | 22.2222221           | 4376           | 12.637537        |
| 25094 | GO:0050789(GO:0050791) | regulation of biological process                                                                                               | 0.00    | 71                 | 21.91358             | 4315           | 12.461374        |
| 25098 | GO:0050794(GO:0051244) | regulation of cellular process                                                                                                 | 0.00    | 64                 | 19.753086            | 3987           | 11.514136        |
| 11224 | GO:0019222             | regulation of metabolic process                                                                                                | 0.00    | 48                 | 14.814815            | 3115           | 8.958571         |
| 5243  | GO:0007218             | neuropeptide signaling pathway                                                                                                 | 0.00    | 2                  | 0.61728394           | 5              | 0.0144396        |
| 21058 | GO:0045454(GO:0030503) | cell redox homeostasis                                                                                                         | 0.00    | 8                  | 2.4691358            | 211            | 0.6093511        |
| 7074  | GO:0009815             | 1-aminocyclopropane-1-carboxylate dioxygenase activity                                                                         | 0.00    | 4                  | 1.2345679            | 49             | 0.14150807       |
| 4530  | GO:0006355(GO:0032583) | regulation of transcription, DNA-dependent                                                                                     | 0.00    | 40                 | 12.345679            | 2591           | 7.4826           |
| 26544 | GO:0051252             | regulation of RNA metabolic process                                                                                            | 0.00    | 40                 | 12.345679            | 2593           | 7.488376         |
| 13756 | GO:0031326             | regulation of cellular biosynthetic process                                                                                    | 0.00    | 40                 | 12.345679            | 2605           | 7.523031         |
| 7141  | GO:0009889             | regulation of biosynthetic process                                                                                             | 0.00    | 40                 | 12.345679            | 2605           | 7.523031         |
| 32213 | GO:2000112             | regulation of cellular macromolecule biosynthetic process                                                                      | 0.00    | 40                 | 12.345679            | 2605           | 7.523031         |
| 7772  | GO:0010556             | regulation of macromolecule biosynthetic process                                                                               | 0.00    | 40                 | 12.345679            | 2605           | 7.523031         |
| 31493 | GO:0080118             | brassinosteroid sulfotransferase activity                                                                                      | 0.00    | 3                  | 0.9259259            | 25             | 0.072197996      |
| 5702  | GO:0008146             | sulfotransferase activity                                                                                                      | 0.00    | 4                  | 1.2345679            | 54             | 0.15594767       |
| 11695 | GO:0019725             | cellular homeostasis                                                                                                           | 0.00    | 8                  | 2.4691358            | 234            | 0.67577326       |
| 7692  | GO:0010468             | regulation of gene expression                                                                                                  | 0.00    | 40                 | 12.345679            | 2635           | 7.6096887        |
| 18925 | GO:0042592             | homeostatic process                                                                                                            | 0.00    | 8                  | 2.4691358            | 238            | 0.68732494       |
| 19393 | GO:0043086             | negative regulation of catalytic activity                                                                                      | 0.00    | 7                  | 2.1604939            | 188            | 0.54292893       |
| 20342 | GO:0044092             | negative regulation of molecular function                                                                                      | 0.00    | 7                  | 2.1604939            | 188            | 0.54292893       |
| 27228 | GO:0060255             | regulation of macromolecule biosynthetic process                                                                               | 0.00    | 40                 | 12.345679            | 2660           | 7.6818666        |
| 25468 | GO:0051171             | regulation of nitrogen compound metabolic process                                                                              | 0.00    | 40                 | 12.345679            | 2675           | 7.7251854        |
| 11221 | GO:0019219             | regulation of nucleobase, nucleoside, nucleotide, and nucleic acid metabolic process                                           | 0.00    | 40                 | 12.345679            | 2675           | 7.7251854        |
| 31465 | GO:0080090             | regulation of primary metabolic process                                                                                        | 0.00    | 40                 | 12.345679            | 2710           | 7.826263         |
| 28365 | GO:0065008             | regulation of biological quality                                                                                               | 0.00    | 9                  | 2.7777777            | 316            | 0.9125827        |
| 19255 | GO:0042938             | dipeptide transport                                                                                                            | 0.00    | 5                  | 1.5432099            | 105            | 0.3032316        |
| 19253 | GO:0042936             | dipeptide transporter activity                                                                                                 | 0.00    | 5                  | 1.5432099            | 105            | 0.3032316        |
| 8517  | GO:0015103             | inorganic anion transmembrane transport                                                                                        | 0.00    | 6                  | 1.8518518            | 154            | 0.44473964       |
| 3464  | GO:0004857             | enzyme inhibitor activity                                                                                                      | 0.00    | 6                  | 1.8518518            | 157            | 0.4534034        |
| 12946 | GO:0030414             | peptidase inhibitor activity                                                                                                   | 0.00    | 5                  | 1.5432099            | 110            | 0.31767118       |
| 7690  | GO:0010466             | negative regulation of peptidase activity                                                                                      | 0.00    | 5                  | 1.5432099            | 110            | 0.31767118       |
| 25636 | GO:0051346             | negative regulation of hydrolytic enzyme activity                                                                              | 0.00    | 5                  | 1.5432099            | 110            | 0.31767118       |
| 9722  | GO:0016641             | oxidoreductase activity, acting on NADPH or NADH, reduced flavin mononucleotide, and reduced nicotinamide adenine dinucleotide | 0.00    | 4                  | 1.2345679            | 69             | 0.19926646       |
| 28100 | GO:0061134             | peptidase regulator activity                                                                                                   | 0.00    | 5                  | 1.5432099            | 112            | 0.32344702       |
| 26711 | GO:0052547             | regulation of peptidase activity                                                                                               | 0.00    | 5                  | 1.5432099            | 112            | 0.32344702       |
| 13753 | GO:0031323             | regulation of cellular metabolic process                                                                                       | 0.00    | 40                 | 12.345679            | 2770           | 7.999538         |
| 9832  | GO:0016782             | transferase activity, transferring a phosphate group                                                                           | 0.01    | 4                  | 1.2345679            | 74             | 0.21370606       |
| 8967  | GO:0015698             | inorganic anion transport                                                                                                      | 0.01    | 6                  | 1.8518518            | 176            | 0.5082739        |
| 13082 | GO:0030599             | pectinesterase activity                                                                                                        | 0.01    | 6                  | 1.8518518            | 178            | 0.5140497        |
| 3307  | GO:0004675             | transmembrane receptor protein tyrosine kinase activity                                                                        | 0.01    | 9                  | 2.7777777            | 367            | 1.0598665        |
| 31431 | GO:0080054             | low affinity nitrate transporter activity                                                                                      | 0.01    | 3                  | 0.9259259            | 45             | 0.1299564        |
| 12608 | GO:0030001             | metal ion transport                                                                                                            | 0.01    | 9                  | 2.7777777            | 374            | 1.080082         |
| 4910  | GO:0006811             | ion transport                                                                                                                  | 0.01    | 17                 | 5.2469134            | 959            | 2.769515         |
| 219   | GO:0000287             | magnesium ion binding                                                                                                          | 0.01    | 2                  | 0.61728394           | 16             | 0.046206716      |
| 9719  | GO:0016638             | oxidoreductase activity, acting on NADPH or NADH, reduced flavin mononucleotide, and reduced nicotinamide adenine dinucleotide | 0.01    | 4                  | 1.2345679            | 89             | 0.25702485       |
| 8608  | GO:0015198             | oligopeptide transporter activity                                                                                              | 0.01    | 5                  | 1.5432099            | 139            | 0.40142086       |
| 8607  | GO:0015197(GO:0015637) | peptide transporter activity                                                                                                   | 0.01    | 5                  | 1.5432099            | 139            | 0.40142086       |
| 9099  | GO:0015833             | peptide transport                                                                                                              | 0.01    | 5                  | 1.5432099            | 141            | 0.4071967        |
| 4944  | GO:0006857             | oligopeptide transport                                                                                                         | 0.01    | 5                  | 1.5432099            | 141            | 0.4071967        |
| 2986  | GO:0004252             | serine-type endopeptidase activity                                                                                             | 0.01    | 5                  | 1.5432099            | 144            | 0.41586044       |
| 5792  | GO:0008271             | secondary active sulfate transport                                                                                             | 0.01    | 2                  | 0.61728394           | 18             | 0.051982556      |
| 22917 | GO:0047429             | nucleoside-triphosphate diphosphate exchange factor activity                                                                   | 0.01    | 2                  | 0.61728394           | 18             | 0.051982556      |
| 8736  | GO:0015381             | high affinity sulfate transporter activity                                                                                     | 0.01    | 2                  | 0.61728394           | 18             | 0.051982556      |
| 6023  | GO:0008569             | minus-end-directed microtubule motor activity                                                                                  | 0.02    | 1                  | 0.30864197           | 2              | 0.00577584       |
| 8526  | GO:0015112             | nitrate transmembrane transport                                                                                                | 0.02    | 3                  | 0.9259259            | 61             | 0.1761631        |
| 8975  | GO:0015706(GO:0006872) | nitrate transport                                                                                                              | 0.02    | 3                  | 0.9259259            | 61             | 0.1761631        |
| 5213  | GO:0007186             | G-protein coupled receptor protein tyrosine kinase activity                                                                    | 0.02    | 3                  | 0.9259259            | 62             | 0.17905103       |
| 8530  | GO:0015116             | sulfate transmembrane transport                                                                                                | 0.02    | 2                  | 0.61728394           | 26             | 0.075085916      |
| 8494  | GO:0015075             | ion transmembrane transport                                                                                                    | 0.02    | 14                 | 4.3209877            | 827            | 2.3883097        |
| 16603 | GO:0034220             | ion transmembrane transport                                                                                                    | 0.03    | 14                 | 4.3209877            | 833            | 2.4056373        |
| 5793  | GO:0008272(GO:0006870) | sulfate transport                                                                                                              | 0.03    | 2                  | 0.61728394           | 28             | 0.080861755      |
| 5981  | GO:0008509             | anion transmembrane transport                                                                                                  | 0.03    | 6                  | 1.8518518            | 245            | 0.70754033       |
| 4917  | GO:0006820(GO:0006822) | anion transport                                                                                                                | 0.03    | 6                  | 1.8518518            | 247            | 0.7133162        |
| 26845 | GO:0052689             | carboxylic ester hydrolase activity                                                                                            | 0.03    | 10                 | 3.0864198            | 538            | 1.5537009        |
| 9600  | GO:0016491             | oxidoreductase activity                                                                                                        | 0.03    | 24                 | 7.4074073            | 1724           | 4.9787736        |
| 4528  | GO:0006353             | transcription termination, DNA-dependent                                                                                       | 0.04    | 1                  | 0.30864197           | 4              | 0.011551679      |
| 9351  | GO:0016119             | carotene metabolic process                                                                                                     | 0.04    | 1                  | 0.30864197           | 4              | 0.011551679      |
| 9352  | GO:0016120             | carotene biosynthetic process                                                                                                  | 0.04    | 1                  | 0.30864197           | 4              | 0.011551679      |
| 9819  | GO:0016767             | geranylgeranyl-diphosphate synthase activity                                                                                   | 0.04    | 1                  | 0.30864197           | 4              | 0.011551679      |
| 18575 | GO:0042214             | terpene metabolic process                                                                                                      | 0.04    | 1                  | 0.30864197           | 4              | 0.011551679      |
| 21791 | GO:0046246             | terpene biosynthetic process                                                                                                   | 0.04    | 1                  | 0.30864197           | 4              | 0.011551679      |
| 22408 | GO:0046905             | phytoene synthase activity                                                                                                     | 0.04    | 1                  | 0.30864197           | 4              | 0.011551679      |
| 5196  | GO:0007166             | cell surface receptor linked signal transduction                                                                               | 0.04    | 3                  | 0.9259259            | 78             | 0.22525774       |
| 25626 | GO:0051336             | regulation of hydrolase activity                                                                                               | 0.04    | 5                  | 1.5432099            | 196            | 0.5660323        |
| 3490  | GO:0004888(GO:0004926) | transmembrane receptor activity, ion channel                                                                                   | 0.04    | 10                 | 3.0864198            | 571            | 1.6490022        |
| 8739  | GO:0015385(GO:0015502) | sodium:hydrogen antiporter activity                                                                                            | 0.04    | 2                  | 0.61728394           | 36             | 0.10396511       |
| 4911  | GO:0006812(GO:0006819) | cation transport                                                                                                               | 0.05    | 11                 | 3.3950617            | 662            | 1.9118029        |
| 11202 | GO:0019199             | transmembrane receptor protein tyrosine kinase activity                                                                        | 0.05    | 9                  | 2.7777777            | 504            | 1.4555116        |
| 22376 | GO:0046873             | metal ion transmembrane transport                                                                                              | 0.05    | 5                  | 1.5432099            | 213            | 0.6151269        |
| 5766  | GO:0008236             | serine-type peptidase activity                                                                                                 | 0.05    | 5                  | 1.5432099            | 214            | 0.6180149        |
| 3476  | GO:0004872(GO:0019041) | receptor activity                                                                                                              | 0.05    | 11                 | 3.3950617            | 672            | 1.9406822        |
| 5810  | GO:0008290             | F-actin capping protein complex activity                                                                                       | 0.05    | 1                  | 0.30864197           | 6              | 0.01732752       |
| 8505  | GO:0015089             | high affinity copper ion transporter activity                                                                                  | 0.05    | 1                  | 0.30864197           | 6              | 0.01732752       |
| 14264 | GO:0031849             | olfactory receptor binding                                                                                                     | 0.05    | 1                  | 0.30864197           | 6              | 0.01732752       |
| 2713  | GO:0003863             | 3-methyl-2-oxobutanoate decarboxylase activity                                                                                 | 0.05    | 1                  | 0.30864197           | 6              | 0.01732752       |
| 5704  | GO:0008150(GO:0000004) | biological process                                                                                                             | 0.06    | 222                | 68.51852             | 22215          | 64.155136        |
| 10103 | GO:0017171             | serine hydrolase activity                                                                                                      | 0.06    | 5                  | 1.5432099            | 220            | 0.63534236       |
| 4990  | GO:0006915(GO:0008632) | apoptosis                                                                                                                      | 0.06    | 5                  | 1.5432099            | 227            | 0.6555578        |
| 3021  | GO:0004337             | geranyltransferase activity                                                                                                    | 0.06    | 1                  | 0.30864197           | 7              | 0.020215439      |
| 27063 | GO:0060089             | molecular transducer activity                                                                                                  | 0.07    | 12                 | 3.7037036            | 787            | 2.2727928        |
| 3475  | GO:0004871(GO:0005062) | signal transducer activity                                                                                                     | 0.07    | 12                 | 3.7037036            | 787            | 2.2727928        |
| 5195  | GO:0007165(GO:0023033) | signal transduction                                                                                                            | 0.07    | 14                 | 4.3209877            | 961            | 2.775291         |
| 12602 | GO:0023052(GO:0023046) | signaling                                                                                                                      | 0.07    | 14                 | 4.3209877            | 961            | 2.775291         |
| 25998 | GO:0051716             | cellular response to stimulus                                                                                                  | 0.07    | 16                 | 4.9382715            | 1138           | 3.2864528        |
| 7843  | GO:0010628             | positive regulation of gene expression                                                                                         | 0.07    | 1                  | 0.30864197           | 8              | 0.023103358      |
| 21461 | GO:0045893(GO:0043193) | positive regulation of transcription                                                                                           | 0.07    | 1                  | 0.30864197           | 8              | 0.023103358      |
| 3022  | GO:0004338             | glucan exo-1,3-beta-glucosidase activity                                                                                       | 0.07    | 1                  | 0.30864197           | 8              | 0.023103358      |
| 3402  | GO:0004791             | thioredoxin-disulfide reductase activity                                                                                       | 0.07    | 1                  | 0.30864197           | 8              | 0.023103358      |
| 5756  | GO:0008219             | cell death                                                                                                                     | 0.07    | 5                  | 1.5432099            | 239            | 0.69021285       |
| 8209  | GO:0012501(GO:0016244) | programmed cell death                                                                                                          | 0.07    | 5                  | 1.5432099            | 239            | 0.69021285       |
| 9462  | GO:0016265             | death                                                                                                                          | 0.07    | 5                  | 1.5432099            | 239            | 0.69021285       |
| 3844  | GO:0005451             | monovalent cation:hydrogen ion symporter activity                                                                              | 0.08    | 2                  | 0.61728394           | 49             | 0.14150807       |
| 25195 | GO:0050896(GO:0051869) | response to stimulus                                                                                                           | 0.08    | 24                 | 7.4074073            | 1881           | 5.432177         |
| 19342 | GO:0043027             | caspase inhibitor activity                                                                                                     | 0.08    | 1                  | 0.30864197           | 9              | 0.025991278      |
| 19343 | GO:0043028             | caspase regulator activity                                                                                                     | 0.08    | 1                  | 0.30864197           | 9              | 0.025991278      |
| 19458 | GO:0043154(GO:0001719) | negative regulation of caspase activity                                                                                        | 0.08    | 1                  | 0.30864197           | 9              | 0.025991278      |
| 19579 | GO:0043281(GO:0043026) | regulation of caspase activity                                                                                                 | 0.08    | 1                  | 0.30864197           | 9              | 0.025991278      |
| 2975  | GO:0004175(GO:0016809) | endopeptidase activity                                                                                                         | 0.08    | 6                  | 1.8518518            | 320            | 0.9241344        |
| 25095 | GO:0050790             | regulation of catalytic activity                                                                                               | 0.08    | 8                  | 2.4691358            | 480            | 1.3862015        |
| 12794 | GO:0030234             | enzyme regulator activity                                                                                                      | 0.09    | 7                  | 2.1604939            | 403            | 1.1638317        |
| 28366 | GO:0065009             | regulation of molecular function                                                                                               | 0.09    | 8                  | 2.4691358            | 484            | 1.3977532        |



|       |                         |                                                             |      |    |            |      |             |
|-------|-------------------------|-------------------------------------------------------------|------|----|------------|------|-------------|
| 8673  | GO:0015291 GO:0015290 C | secondary active transmembrane transport                    | 0.09 | 7  | 2.1604939  | 407  | 1.1753833   |
| 5678  | GO:0008113 GO:0033742   | peptide-methionine-(S)-S-oxidoreductase activity, acting on | 0.09 | 1  | 0.30864197 | 10   | 0.0288792   |
| 9741  | GO:0016668 GO:0016654   | oxidoreductase activity, acting on                          | 0.09 | 1  | 0.30864197 | 10   | 0.0288792   |
| 983   | GO:0001664              | G-protein-coupled receptor binding                          | 0.09 | 1  | 0.30864197 | 10   | 0.0288792   |
| 12574 | GO:0022892              | substrate-specific transporter activity                     | 0.10 | 19 | 5.8641977  | 1463 | 4.2250266   |
| 4909  | GO:0006810 GO:0015457 C | transport                                                   | 0.10 | 28 | 8.641975   | 2315 | 6.6855345   |
| 25529 | GO:0051234              | establishment of localization                               | 0.10 | 28 | 8.641975   | 2315 | 6.6855345   |
| 24966 | GO:0050660              | flavin adenine dinucleotide binding                         | 0.10 | 3  | 0.9259259  | 118  | 0.34077454  |
| 25476 | GO:0051179              | localization                                                | 0.10 | 28 | 8.641975   | 2319 | 6.697086    |
| 4913  | GO:0006814 GO:0006834 C | sodium ion transport                                        | 0.10 | 2  | 0.61728394 | 58   | 0.16749935  |
| 8499  | GO:0015081 GO:0022816   | sodium ion transmembrane transport                          | 0.10 | 2  | 0.61728394 | 58   | 0.16749935  |
| 18086 | GO:0035725              | sodium ion transmembrane transport                          | 0.10 | 2  | 0.61728394 | 58   | 0.16749935  |
| 29800 | GO:0071436              | sodium ion export                                           | 0.10 | 2  | 0.61728394 | 58   | 0.16749935  |
| 4526  | GO:0006351 GO:0006350 C | transcription, DNA-dependent                                | 0.10 | 20 | 6.1728396  | 1575 | 4.548474    |
| 15176 | GO:0032774              | RNA biosynthetic process                                    | 0.10 | 20 | 6.1728396  | 1575 | 4.548474    |
| 7526  | GO:0010301 GO:0033710   | xanthoxin dehydrogenase activity                            | 0.11 | 1  | 0.30864197 | 12   | 0.03465504  |
| 8748  | GO:0015398              | high affinity secondary active transport                    | 0.11 | 1  | 0.30864197 | 12   | 0.03465504  |
| 21503 | GO:0045935              | positive regulation of nucleoside diphosphate binding       | 0.11 | 1  | 0.30864197 | 12   | 0.03465504  |
| 25470 | GO:0051173              | positive regulation of nitrogen fixation                    | 0.11 | 1  | 0.30864197 | 12   | 0.03465504  |
| 25546 | GO:0051254              | positive regulation of RNA metabolism                       | 0.11 | 1  | 0.30864197 | 12   | 0.03465504  |
| 2843  | GO:0004034              | aldose 1-epimerase activity                                 | 0.11 | 1  | 0.30864197 | 12   | 0.03465504  |
| 8149  | GO:0010941              | regulation of cell death                                    | 0.12 | 1  | 0.30864197 | 13   | 0.037542958 |
| 19298 | GO:0042981              | regulation of apoptosis                                     | 0.12 | 1  | 0.30864197 | 13   | 0.037542958 |
| 19381 | GO:0043067 GO:0043070   | regulation of programmed cell death                         | 0.12 | 1  | 0.30864197 | 13   | 0.037542958 |
| 22416 | GO:0046915              | transition metal ion transport                              | 0.12 | 2  | 0.61728394 | 64   | 0.18482687  |
| 4641  | GO:0006508              | proteolysis                                                 | 0.12 | 13 | 4.012346   | 955  | 2.7868426   |
| 12516 | GO:0022804              | active transmembrane transport                              | 0.12 | 11 | 3.3950617  | 787  | 2.2727928   |
| 31408 | GO:0080031              | methyl salicylate esterase activity                         | 0.12 | 1  | 0.30864197 | 14   | 0.040430877 |
| 12573 | GO:0022891              | substrate-specific transporter activity                     | 0.12 | 16 | 4.9382715  | 1241 | 3.5839086   |
| 3473  | GO:0004867              | serine-type endopeptidase inhibitor activity                | 0.13 | 2  | 0.61728394 | 66   | 0.1906027   |
| 7520  | GO:0010294              | abscisic acid glucosyltransferase activity                  | 0.13 | 1  | 0.30864197 | 15   | 0.043318797 |
| 9340  | GO:0016108              | tetraterpene metabolic process                              | 0.13 | 1  | 0.30864197 | 15   | 0.043318797 |
| 9341  | GO:0016109              | tetraterpene biosynthetic process                           | 0.13 | 1  | 0.30864197 | 15   | 0.043318797 |
| 9348  | GO:0016116              | carotenoid metabolic process                                | 0.13 | 1  | 0.30864197 | 15   | 0.043318797 |
| 9349  | GO:0016117              | carotenoid biosynthetic process                             | 0.13 | 1  | 0.30864197 | 15   | 0.043318797 |
| 26959 | GO:0055114              | oxidation-reduction process                                 | 0.13 | 29 | 8.950617   | 2490 | 7.1909204   |
| 4954  | GO:0006869              | lipid transport                                             | 0.13 | 4  | 1.2345679  | 208  | 0.6006873   |
| 8085  | GO:0010876              | lipid localization                                          | 0.13 | 4  | 1.2345679  | 208  | 0.6006873   |
| 32    | GO:0000041              | transition metal ion transport                              | 0.13 | 2  | 0.61728394 | 68   | 0.19637854  |
| 5840  | GO:0008324              | cation transmembrane transport                              | 0.13 | 8  | 2.4691358  | 538  | 1.5537009   |
| 3829  | GO:0005381 GO:0005382 C | iron ion transmembrane transport                            | 0.14 | 1  | 0.30864197 | 16   | 0.046206716 |
| 17134 | GO:0034755              | iron ion transmembrane transport                            | 0.14 | 1  | 0.30864197 | 16   | 0.046206716 |
| 22412 | GO:0046910              | pectinesterase inhibitor activity                           | 0.14 | 1  | 0.30864197 | 16   | 0.046206716 |
| 31396 | GO:0080019              | fatty-acyl-CoA reductase activity                           | 0.14 | 1  | 0.30864197 | 16   | 0.046206716 |
| 2667  | GO:0003777              | microtubule motor activity                                  | 0.14 | 1  | 0.30864197 | 16   | 0.046206716 |
| 3742  | GO:0005242              | inward rectifier potassium channel activity                 | 0.14 | 1  | 0.30864197 | 16   | 0.046206716 |
| 9740  | GO:0018667              | oxidoreductase activity, acting on                          | 0.15 | 2  | 0.61728394 | 72   | 0.20793022  |
| 18738 | GO:0042389              | omega-3 fatty acid desaturase activity                      | 0.15 | 1  | 0.30864197 | 17   | 0.049094636 |
| 31498 | GO:0080123              | jasmonate-amino synthetase activity                         | 0.15 | 1  | 0.30864197 | 17   | 0.049094636 |
| 5019  | GO:0006952 GO:0002217 C | defense response                                            | 0.15 | 4  | 1.2345679  | 221  | 0.63823026  |
| 7773  | GO:0010557              | positive regulation of macrophage chemotaxis                | 0.16 | 1  | 0.30864197 | 18   | 0.051982556 |
| 12887 | GO:0030332              | cyclin binding                                              | 0.16 | 1  | 0.30864197 | 18   | 0.051982556 |
| 8810  | GO:0015491              | cation:cation antiporter activity                           | 0.16 | 2  | 0.61728394 | 75   | 0.21659398  |
| 12547 | GO:0022857 GO:0005386 C | transmembrane transporter activity                          | 0.16 | 18 | 5.5555553  | 1483 | 4.282785    |
| 11776 | GO:0019825              | oxygen binding                                              | 0.16 | 6  | 1.8518518  | 389  | 1.1234008   |
| 5791  | GO:0008270              | zinc ion binding                                            | 0.17 | 22 | 6.7901235  | 1880 | 5.4292893   |
| 4921  | GO:0006826 GO:0015681   | iron ion transport                                          | 0.17 | 1  | 0.30864197 | 20   | 0.0577584   |
| 5991  | GO:0008519              | ammonium transmembrane transport                            | 0.17 | 1  | 0.30864197 | 20   | 0.0577584   |
| 8965  | GO:0015696              | ammonium transport                                          | 0.17 | 1  | 0.30864197 | 20   | 0.0577584   |
| 9707  | GO:0016624              | oxidoreductase activity, acting on                          | 0.17 | 1  | 0.30864197 | 20   | 0.0577584   |
| 30844 | GO:0072488              | ammonium transmembrane transport                            | 0.17 | 1  | 0.30864197 | 20   | 0.0577584   |
| 716   | GO:0001071              | nucleic acid binding transcription factor activity          | 0.18 | 17 | 5.2469134  | 1417 | 4.0921826   |
| 2643  | GO:0003700 GO:0000130   | sequence-specific DNA binding                               | 0.18 | 17 | 5.2469134  | 1417 | 4.0921826   |
| 3474  | GO:0004869 GO:0004870   | cysteine-type endopeptidase inhibitor activity              | 0.18 | 1  | 0.30864197 | 21   | 0.060646318 |
| 17024 | GO:0034645 GO:0034961   | cellular macromolecule biosynthesis                         | 0.18 | 23 | 7.0987654  | 1999 | 5.7729516   |
| 6428  | GO:0009059 GO:0043284   | macromolecule biosynthetic process                          | 0.18 | 23 | 7.0987654  | 2003 | 5.7845035   |
| 22415 | GO:0046914              | transition metal ion binding                                | 0.19 | 29 | 8.950617   | 2599 | 7.5057034   |
| 3828  | GO:0005375 GO:0005378 C | copper ion transmembrane transport                          | 0.19 | 1  | 0.30864197 | 22   | 0.06353424  |
| 4920  | GO:0006825              | copper ion transport                                        | 0.19 | 1  | 0.30864197 | 22   | 0.06353424  |
| 7143  | GO:0009891              | positive regulation of biosynthesis                         | 0.19 | 1  | 0.30864197 | 22   | 0.06353424  |
| 13038 | GO:0030551              | cyclic nucleotide binding                                   | 0.19 | 1  | 0.30864197 | 22   | 0.06353424  |
| 13758 | GO:0031328              | positive regulation of cellular homeostasis                 | 0.19 | 1  | 0.30864197 | 22   | 0.06353424  |
| 17800 | GO:0035434              | copper ion transmembrane transport                          | 0.19 | 1  | 0.30864197 | 22   | 0.06353424  |
| 3955  | GO:0005634              | nucleus                                                     | 0.19 | 17 | 5.2469134  | 1433 | 4.138389    |
| 7527  | GO:0010302              | 2-oxoglutarate-dependent dioxygenase activity               | 0.19 | 1  | 0.30864197 | 23   | 0.06642216  |
| 12572 | GO:0022890 GO:0015082   | inorganic cation transmembrane transport                    | 0.20 | 5  | 1.5432099  | 332  | 0.9587894   |
| 31407 | GO:0080030              | methyl indole-3-acetate esterase activity                   | 0.20 | 1  | 0.30864197 | 24   | 0.06931008  |
| 26931 | GO:0055085              | transmembrane transport                                     | 0.20 | 18 | 5.5555553  | 1548 | 4.4705      |
| 4476  | GO:0006278              | RNA-dependent DNA replication                               | 0.20 | 3  | 0.9259259  | 166  | 0.4793947   |
| 3723  | GO:0005215 GO:0005478   | transporter activity                                        | 0.21 | 21 | 6.4814816  | 1844 | 5.325234    |
| 31895 | GO:0090304              | nucleic acid metabolic process                              | 0.21 | 26 | 8.024692   | 2340 | 6.5777324   |
| 19125 | GO:0042802              | identical protein binding                                   | 0.21 | 9  | 2.7777777  | 697  | 2.01288     |
| 18747 | GO:0042398              | cellular modified amino acid binding                        | 0.21 | 1  | 0.30864197 | 25   | 0.072197996 |
| 9308  | GO:0016070              | RNA metabolic process                                       | 0.21 | 21 | 6.4814816  | 1855 | 5.3570914   |
| 8516  | GO:0015101              | organic cation transmembrane transport                      | 0.22 | 1  | 0.30864197 | 26   | 0.075085916 |
| 8964  | GO:0015695              | organic cation transport                                    | 0.22 | 1  | 0.30864197 | 26   | 0.075085916 |
| 9744  | GO:0016671              | oxidoreductase activity, acting on                          | 0.22 | 1  | 0.30864197 | 26   | 0.075085916 |
| 8159  | GO:0010951              | negative regulation of endopeptidase activity               | 0.22 | 2  | 0.61728394 | 95   | 0.27435237  |
| 26712 | GO:0052548              | regulation of endopeptidase activity                        | 0.22 | 2  | 0.61728394 | 95   | 0.27435237  |
| 28101 | GO:0061135              | endopeptidase regulator activity                            | 0.22 | 2  | 0.61728394 | 95   | 0.27435237  |
| 3472  | GO:0004866              | endopeptidase inhibitor activity                            | 0.22 | 2  | 0.61728394 | 95   | 0.27435237  |
| 9346  | GO:0016114              | terpenoid biosynthetic process                              | 0.22 | 1  | 0.30864197 | 27   | 0.077973835 |
| 3631  | GO:0005089              | Rho guanyl-nucleotide exchange factor activity              | 0.22 | 1  | 0.30864197 | 27   | 0.077973835 |
| 6940  | GO:0009672              | auxin:hydrogen symporter activity                           | 0.23 | 1  | 0.30864197 | 28   | 0.080861755 |
| 7145  | GO:0009893              | positive regulation of metabolism                           | 0.23 | 1  | 0.30864197 | 28   | 0.080861755 |
| 7819  | GO:0010604              | positive regulation of macrophage chemotaxis                | 0.23 | 1  | 0.30864197 | 28   | 0.080861755 |
| 13755 | GO:0031325              | positive regulation of cellular homeostasis                 | 0.23 | 1  | 0.30864197 | 28   | 0.080861755 |
| 8681  | GO:0015299              | solute:hydrogen antiporter activity                         | 0.23 | 2  | 0.61728394 | 98   | 0.28301615  |
| 22375 | GO:0046872              | metal ion binding                                           | 0.23 | 32 | 9.876543   | 2985 | 8.6204405   |
| 19126 | GO:0042803              | protein homodimerization activity                           | 0.24 | 4  | 1.2345679  | 265  | 0.7652988   |
| 4704  | GO:0006575              | cellular modified amino acid binding                        | 0.24 | 1  | 0.30864197 | 29   | 0.083749674 |
| 4841  | GO:0006721              | terpenoid metabolic process                                 | 0.24 | 1  | 0.30864197 | 29   | 0.083749674 |
| 19470 | GO:0043167              | ion binding                                                 | 0.24 | 32 | 9.876543   | 2997 | 8.655096    |
| 19472 | GO:0043169              | cation binding                                              | 0.24 | 32 | 9.876543   | 2997 | 8.655096    |
| 5916  | GO:0008422 GO:0016983   | beta-glucosidase activity                                   | 0.25 | 1  | 0.30864197 | 30   | 0.086637594 |
| 6216  | GO:0008810              | cellulase activity                                          | 0.25 | 1  | 0.30864197 | 30   | 0.086637594 |
| 2666  | GO:0003774              | motor activity                                              | 0.25 | 1  | 0.30864197 | 30   | 0.086637594 |
| 2870  | GO:0004064              | arylesterase activity                                       | 0.25 | 1  | 0.30864197 | 30   | 0.086637594 |
| 3518  | GO:0004930 GO:0001622 C | G-protein coupled receptor activity                         | 0.25 | 1  | 0.30864197 | 30   | 0.086637594 |
| 22049 | GO:0046527              | glucosyltransferase activity                                | 0.25 | 4  | 1.2345679  | 270  | 0.77973837  |
| 11931 | GO:0020037              | heme binding                                                | 0.26 | 7  | 2.1604939  | 550  | 1.5883559   |
| 3785  | GO:0005315 GO:0005317   | inorganic phosphate transport                               | 0.26 | 1  | 0.30864197 | 32   | 0.09241343  |
| 4481  | GO:0006284              | base-excision repair                                        | 0.26 | 1  | 0.30864197 | 32   | 0.09241343  |
| 12833 | GO:0030275              | LRR domain binding                                          | 0.26 | 1  | 0.30864197 | 32   | 0.09241343  |
| 23914 | GO:0048522 GO:0051242   | positive regulation of cellular homeostasis                 | 0.26 | 1  | 0.30864197 | 32   | 0.09241343  |
| 3717  | GO:0005199              | structural constituent of cell wall                         | 0.26 | 1  | 0.30864197 | 32   | 0.09241343  |
| 24968 | GO:0050662              | coenzyme binding                                            | 0.27 | 3  | 0.9259259  | 191  | 0.5515927   |
| 3749  | GO:0005249              | voltage-gated potassium channel activity                    | 0.27 | 1  | 0.30864197 | 34   | 0.09818927  |
| 3872  | GO:0005506              | iron ion binding                                            | 0.28 | 7  | 2.1604939  | 563  | 1.6258988   |
| 6355  | GO:0008970              | phospholipase A1 activity                                   | 0.28 | 1  | 0.30864197 | 35   | 0.10107719  |
| 23199 | GO:0047714              | galactolipase activity                                      | 0.28 | 1  | 0.30864197 | 35   | 0.10107719  |
| 8680  | GO:0015298              | solute:cation antiporter activity                           | 0.28 | 2  | 0.61728394 | 112  | 0.32344702  |



|       |                          |                                 |      |    |            |      |             |
|-------|--------------------------|---------------------------------|------|----|------------|------|-------------|
| 29918 | GO:0071554               | cell wall organization or biog  | 0.28 | 2  | 0.61728394 | 112  | 0.32344702  |
| 9933  | GO:0016903               | oxidoreductase activity, actin  | 0.29 | 2  | 0.61728394 | 113  | 0.32633495  |
| 12626 | GO:0030029               | actin filament-based process    | 0.29 | 1  | 0.30864197 | 36   | 0.10396511  |
| 12633 | GO:0030036               | actin cytoskeleton organizati   | 0.29 | 1  | 0.30864197 | 36   | 0.10396511  |
| 22478 | GO:0046982               | protein heterodimerization ac   | 0.29 | 2  | 0.61728394 | 114  | 0.32922286  |
| 3758  | GO:0005267               | potassium channel activity      | 0.29 | 1  | 0.30864197 | 37   | 0.10685303  |
| 5066  | GO:0007010               | cytoskeleton organization       | 0.30 | 1  | 0.30864197 | 38   | 0.10974095  |
| 12538 | GO:0022843               | voltage-gated cation channel    | 0.30 | 1  | 0.30864197 | 38   | 0.10974095  |
| 8584  | GO:0015171 GO:0015359    | amino acid transmembrane t      | 0.30 | 2  | 0.61728394 | 118  | 0.34077454  |
| 2521  | GO:0003333               | amino acid transmembrane t      | 0.30 | 2  | 0.61728394 | 118  | 0.34077454  |
| 7691  | GO:0010467               | gene expression                 | 0.30 | 21 | 6.4814816  | 1974 | 5.7007537   |
| 23910 | GO:0048518 GO:0043119    | positive regulation of biologic | 0.31 | 1  | 0.30864197 | 40   | 0.1155168   |
| 6884  | GO:0009607               | response to biotic stimulus     | 0.32 | 2  | 0.61728394 | 122  | 0.3523262   |
| 4951  | GO:0006865 GO:0006866    | amino acid transport            | 0.32 | 2  | 0.61728394 | 123  | 0.35521415  |
| 22409 | GO:0046906               | tetrapyrrole binding            | 0.33 | 7  | 2.1604939  | 596  | 1.7212002   |
| 8461  | GO:0015020 GO:0003981    | glucuronosyltransferase acti    | 0.33 | 1  | 0.30864197 | 42   | 0.121292636 |
| 13884 | GO:0031461               | cullin-RING ubiquitin ligase c  | 0.33 | 1  | 0.30864197 | 42   | 0.121292636 |
| 13656 | GO:0031224               | intrinsic to membrane           | 0.33 | 13 | 4.012346   | 1193 | 3.4452884   |
| 3761  | GO:0005275 GO:0005279    | amine transmembrane transp      | 0.33 | 2  | 0.61728394 | 126  | 0.3638779   |
| 17617 | GO:0035251               | UDP-glucosyltransferase act     | 0.33 | 3  | 0.9259259  | 218  | 0.62956655  |
| 9186  | GO:0015926               | glucosidase activity            | 0.34 | 1  | 0.30864197 | 44   | 0.12706847  |
| 8666  | GO:0015276               | ligand-gated ion channel acti   | 0.35 | 1  | 0.30864197 | 45   | 0.1299564   |
| 9893  | GO:0016857               | racemase and epimerase ac       | 0.35 | 1  | 0.30864197 | 45   | 0.1299564   |
| 12530 | GO:0022834               | ligand-gated channel activity   | 0.35 | 1  | 0.30864197 | 45   | 0.1299564   |
| 3630  | GO:0005088               | Ras guanyl-nucleotide excha     | 0.35 | 1  | 0.30864197 | 45   | 0.1299564   |
| 4460  | GO:0006260 GO:0055133    | DNA replication                 | 0.35 | 3  | 0.9259259  | 224  | 0.64689404  |
| 22479 | GO:0046983               | protein dimerization activity   | 0.36 | 6  | 1.8518518  | 517  | 1.4930545   |
| 5732  | GO:0008194               | UDP-glucosyltransferase act     | 0.36 | 4  | 1.2345679  | 322  | 0.9299102   |
| 9103  | GO:0015837               | amine transport                 | 0.36 | 2  | 0.61728394 | 135  | 0.38986918  |
| 14591 | GO:0032183               | SUMO binding                    | 0.36 | 1  | 0.30864197 | 48   | 0.13862015  |
| 28930 | GO:0070566               | adenylyltransferase activity    | 0.36 | 1  | 0.30864197 | 48   | 0.13862015  |
| 3801  | GO:0005342               | organic acid transmembrane      | 0.36 | 2  | 0.61728394 | 136  | 0.3927571   |
| 22444 | GO:0046943               | carboxylic acid transmembra     | 0.36 | 2  | 0.61728394 | 136  | 0.3927571   |
| 3756  | GO:0005261 GO:0015281 GO | cation channel activity         | 0.37 | 1  | 0.30864197 | 49   | 0.14150807  |
| 6483  | GO:0009116               | nucleoside metabolic process    | 0.37 | 1  | 0.30864197 | 49   | 0.14150807  |
| 31421 | GO:0080044               | quercetin 7-O-glucosyltransfe   | 0.37 | 1  | 0.30864197 | 49   | 0.14150807  |
| 30066 | GO:0071702               | organic substance transport     | 0.38 | 6  | 1.8518518  | 529  | 1.5277096   |
| 5096  | GO:0007047               | cellular cell wall organization | 0.38 | 1  | 0.30864197 | 50   | 0.14439599  |
| 6932  | GO:0009664               | plant-type cell wall organizati | 0.38 | 1  | 0.30864197 | 50   | 0.14439599  |
| 7166  | GO:0009914               | hormone transport               | 0.38 | 1  | 0.30864197 | 50   | 0.14439599  |
| 20857 | GO:0045229               | external encapsulating struct   | 0.38 | 1  | 0.30864197 | 50   | 0.14439599  |
| 27891 | GO:0060918               | auxin transport                 | 0.38 | 1  | 0.30864197 | 50   | 0.14439599  |
| 30033 | GO:0071669               | plant-type cell wall organizati | 0.38 | 1  | 0.30864197 | 50   | 0.14439599  |
| 31536 | GO:0080161               | auxin transmembrane transp      | 0.38 | 1  | 0.30864197 | 50   | 0.14439599  |
| 3877  | GO:0005516               | calmodulin binding              | 0.38 | 3  | 0.9259259  | 236  | 0.6815491   |
| 8908  | GO:0015629               | actin cytoskeleton              | 0.38 | 1  | 0.30864197 | 51   | 0.14728391  |
| 9975  | GO:0016998               | cell wall macromolecule cata    | 0.38 | 1  | 0.30864197 | 51   | 0.14728391  |
| 3293  | GO:0004659               | prenyltransferase activity      | 0.38 | 1  | 0.30864197 | 51   | 0.14728391  |
| 4915  | GO:0008817               | phosphate transport             | 0.39 | 1  | 0.30864197 | 52   | 0.15017183  |
| 8528  | GO:0015114               | phosphate transmembrane t       | 0.39 | 1  | 0.30864197 | 52   | 0.15017183  |
| 17801 | GO:0035435               | phosphate transmembrane t       | 0.39 | 1  | 0.30864197 | 52   | 0.15017183  |
| 20287 | GO:0044036               | cell wall macromolecule met     | 0.39 | 1  | 0.30864197 | 52   | 0.15017183  |
| 28378 | GO:0070011               | peptidase activity, acting on l | 0.39 | 6  | 1.8518518  | 537  | 1.550813    |
| 29246 | GO:0070882               | cellular cell wall organization | 0.39 | 1  | 0.30864197 | 53   | 0.15305975  |
| 4478  | GO:0006281               | DNA repair                      | 0.41 | 2  | 0.61728394 | 149  | 0.43030006  |
| 5037  | GO:0006974 GO:0034984    | response to DNA damage st       | 0.41 | 2  | 0.61728394 | 149  | 0.43030006  |
| 3306  | GO:0004674 GO:0004695 GO | protein serine/threonine kinas  | 0.41 | 11 | 3.3950617  | 1062 | 3.0669708   |
| 5715  | GO:0008171               | O-methyltransferase activity    | 0.42 | 1  | 0.30864197 | 57   | 0.16461143  |
| 9813  | GO:0016759               | cellulose synthase activity     | 0.42 | 1  | 0.30864197 | 57   | 0.16461143  |
| 8679  | GO:0015297               | antiporter activity             | 0.42 | 2  | 0.61728394 | 152  | 0.4389638   |
| 8682  | GO:0015300               | solute:solute antiporter activi | 0.42 | 2  | 0.61728394 | 152  | 0.4389638   |
| 5819  | GO:0008299 GO:0009241    | isoprenoid biosynthetic proc    | 0.42 | 1  | 0.30864197 | 58   | 0.16749935  |
| 8028  | GO:0010817               | regulation of hormone levels    | 0.42 | 1  | 0.30864197 | 58   | 0.16749935  |
| 29919 | GO:0071555               | cell wall organization          | 0.42 | 1  | 0.30864197 | 58   | 0.16749935  |
| 6424  | GO:0009055 GO:0009053 GO | electron carrier activity       | 0.42 | 2  | 0.61728394 | 154  | 0.44473964  |
| 9801  | GO:0016747               | transferase activity, transferr | 0.42 | 5  | 1.5432099  | 456  | 1.3168914   |
| 2831  | GO:0004022               | alcohol dehydrogenase (NAD      | 0.43 | 1  | 0.30864197 | 59   | 0.17038727  |
| 9114  | GO:0015849               | organic acid transport          | 0.43 | 2  | 0.61728394 | 156  | 0.45051548  |
| 22443 | GO:0046942               | carboxylic acid transport       | 0.43 | 2  | 0.61728394 | 156  | 0.45051548  |
| 4840  | GO:0006720 GO:0016096    | isoprenoid metabolic process    | 0.43 | 1  | 0.30864197 | 60   | 0.17327519  |
| 4357  | GO:0006139 GO:0055134    | nucleobase, nucleoside, nucle   | 0.43 | 32 | 9.876543   | 3285 | 9.486816    |
| 5763  | GO:0008233               | peptidase activity              | 0.43 | 6  | 1.8518518  | 565  | 1.6316746   |
| 5809  | GO:0008289               | lipid binding                   | 0.43 | 3  | 0.9259259  | 258  | 0.74508333  |
| 2818  | GO:0004003               | ATP-dependent DNA helicase      | 0.44 | 1  | 0.30864197 | 61   | 0.1761631   |
| 6018  | GO:0008559 GO:0005226 GO | xenobiotic-transporting ATPa    | 0.44 | 1  | 0.30864197 | 62   | 0.17905103  |
| 19225 | GO:0042908               | xenobiotic transport            | 0.44 | 1  | 0.30864197 | 62   | 0.17905103  |
| 19227 | GO:0042910               | xenobiotic transporter activity | 0.44 | 1  | 0.30864197 | 62   | 0.17905103  |
| 8496  | GO:0015078               | hydrogen ion transmembrane      | 0.44 | 2  | 0.61728394 | 160  | 0.4620627   |
| 9266  | GO:0016020               | membrane                        | 0.46 | 36 | 11.111111  | 3741 | 10.803708   |
| 9267  | GO:0016021               | integral to membrane            | 0.46 | 11 | 3.3950617  | 1103 | 3.1853757   |
| 9422  | GO:0016209               | antioxidant activity            | 0.46 | 2  | 0.61728394 | 165  | 0.47650677  |
| 9765  | GO:0016702               | oxidoreductase activity, actin  | 0.46 | 1  | 0.30864197 | 66   | 0.1906027   |
| 9890  | GO:0016854               | racemase and epimerase ac       | 0.46 | 1  | 0.30864197 | 66   | 0.1906027   |
| 2629  | GO:0003679 GO:0003679    | DNA helicase activity           | 0.47 | 1  | 0.30864197 | 67   | 0.19349062  |
| 21710 | GO:0046148               | pigment biosynthetic process    | 0.48 | 1  | 0.30864197 | 69   | 0.19926646  |
| 31420 | GO:0080043               | quercetin 3-O-glucosyltransfe   | 0.48 | 1  | 0.30864197 | 69   | 0.19926646  |
| 15949 | GO:0033554               | cellular response to stress     | 0.48 | 2  | 0.61728394 | 173  | 0.49961013  |
| 8943  | GO:0015672               | monovalent inorganic cation     | 0.48 | 4  | 1.2345679  | 383  | 1.1060733   |
| 9768  | GO:0016706               | oxidoreductase activity, actin  | 0.49 | 2  | 0.61728394 | 175  | 0.505386    |
| 4459  | GO:0006259 GO:0055132    | DNA metabolic process           | 0.49 | 5  | 1.5432099  | 493  | 1.4237444   |
| 9764  | GO:0016701               | oxidoreductase activity, actin  | 0.49 | 1  | 0.30864197 | 72   | 0.20793022  |
| 12528 | GO:0022832               | voltage-gated channel activit   | 0.49 | 1  | 0.30864197 | 72   | 0.20793022  |
| 15280 | GO:0032879               | regulation of localization      | 0.49 | 1  | 0.30864197 | 72   | 0.20793022  |
| 17141 | GO:0034762               | regulation of transmembrane     | 0.49 | 1  | 0.30864197 | 72   | 0.20793022  |
| 17144 | GO:0034765               | regulation of ion transmembr    | 0.49 | 1  | 0.30864197 | 72   | 0.20793022  |
| 19568 | GO:0043269               | regulation of ion transport     | 0.49 | 1  | 0.30864197 | 72   | 0.20793022  |
| 25348 | GO:0051049               | regulation of transport         | 0.49 | 1  | 0.30864197 | 72   | 0.20793022  |
| 3744  | GO:0005244               | voltage-gated ion channel ac    | 0.49 | 1  | 0.30864197 | 72   | 0.20793022  |
| 9703  | GO:0016620               | oxidoreductase activity, actin  | 0.50 | 1  | 0.30864197 | 73   | 0.21081814  |
| 18786 | GO:0042440               | pigment metabolic process       | 0.50 | 1  | 0.30864197 | 73   | 0.21081814  |
| 9800  | GO:0016746               | transferase activity, transferr | 0.50 | 5  | 1.5432099  | 498  | 1.438184    |
| 20499 | GO:0044249               | cellular biosynthetic process   | 0.50 | 25 | 7.716049   | 2635 | 7.6096687   |
| 3716  | GO:0005198               | structural molecule activity    | 0.50 | 4  | 1.2345679  | 393  | 1.1349525   |
| 25510 | GO:0051213               | dioxygenase activity            | 0.51 | 1  | 0.30864197 | 75   | 0.21659398  |
| 3627  | GO:0005085 GO:0008433 GO | guanyl-nucleotide exchange f    | 0.51 | 1  | 0.30864197 | 75   | 0.21659398  |
| 5018  | GO:0006950               | response to stress              | 0.51 | 6  | 1.8518518  | 611  | 1.764519    |
| 15436 | GO:0033036               | macromolecule localization      | 0.51 | 4  | 1.2345679  | 397  | 1.1465042   |
| 5663  | GO:0008094 GO:0004011    | DNA-dependent ATPase act        | 0.51 | 1  | 0.30864197 | 76   | 0.2194819   |
| 4916  | GO:0006818               | hydrogen transport              | 0.52 | 3  | 0.9259259  | 292  | 0.84327257  |
| 9246  | GO:0015992               | proton transport                | 0.52 | 3  | 0.9259259  | 292  | 0.84327257  |
| 9811  | GO:0016757 GO:0016932    | transferase activity, transferr | 0.53 | 7  | 2.1604939  | 729  | 2.1052935   |
| 6668  | GO:0009314               | response to radiation           | 0.53 | 1  | 0.30864197 | 81   | 0.23392151  |
| 6751  | GO:0009416               | response to light stimulus      | 0.53 | 1  | 0.30864197 | 81   | 0.23392151  |
| 19473 | GO:0043170 GO:0043283    | macromolecule metabolic pr      | 0.54 | 61 | 18.82716   | 6553 | 18.92454    |
| 3787  | GO:0005319               | lipid transporter activity      | 0.54 | 1  | 0.30864197 | 83   | 0.23969735  |
| 6427  | GO:0009058               | biosynthetic process            | 0.54 | 26 | 8.024692   | 2796 | 8.074624    |
| 4643  | GO:0006511               | ubiquitin-dependent protein c   | 0.55 | 1  | 0.30864197 | 84   | 0.24258527  |
| 4912  | GO:0006813 GO:0015458    | potassium ion transport         | 0.55 | 1  | 0.30864197 | 84   | 0.24258527  |
| 11864 | GO:0019941               | modification-dependent prote    | 0.55 | 1  | 0.30864197 | 84   | 0.24258527  |
| 19898 | GO:0043632               | modification-dependent mac      | 0.55 | 1  | 0.30864197 | 84   | 0.24258527  |
| 20507 | GO:0044257               | cellular protein catabolic pro  | 0.55 | 1  | 0.30864197 | 84   | 0.24258527  |
| 25887 | GO:0051603               | proteolysis involved in cellu   | 0.55 | 1  | 0.30864197 | 84   | 0.24258527  |



|       |                         |                                 |      |     |            |       |            |
|-------|-------------------------|---------------------------------|------|-----|------------|-------|------------|
| 30168 | GO:0071804              | cellular potassium ion transp   | 0.55 | 1   | 0.30864197 | 84    | 0.24258527 |
| 30169 | GO:0071805              | potassium ion transmembran      | 0.55 | 1   | 0.30864197 | 84    | 0.24258527 |
| 12734 | GO:0030163              | protein catabolic process       | 0.55 | 1   | 0.30864197 | 86    | 0.24836111 |
| 20515 | GO:0044265 GO:0034962   | cellular macromolecule cata     | 0.55 | 1   | 0.30864197 | 86    | 0.24836111 |
| 20624 | GO:0044430              | cytoskeletal part               | 0.56 | 1   | 0.30864197 | 88    | 0.25413695 |
| 119   | GO:0000151              | ubiquitin ligase complex        | 0.56 | 1   | 0.30864197 | 88    | 0.25413695 |
| 30069 | GO:0071705              | nitrogen compound transport     | 0.57 | 2   | 0.61728394 | 202   | 0.5833598  |
| 21331 | GO:0045735              | nutrient reservoir activity     | 0.57 | 1   | 0.30864197 | 89    | 0.25702485 |
| 14590 | GO:0032182              | small conjugating protein bin   | 0.57 | 1   | 0.30864197 | 90    | 0.2599128  |
| 2982  | GO:004197               | cysteine-type endopeptidase     | 0.57 | 1   | 0.30864197 | 90    | 0.2599128  |
| 3644  | GO:0005102              | receptor binding                | 0.58 | 1   | 0.30864197 | 91    | 0.2628007  |
| 18956 | GO:0042626              | ATPase activity, coupled to t   | 0.59 | 2   | 0.61728394 | 211   | 0.6093511  |
| 11712 | GO:0019748              | secondary metabolic process     | 0.59 | 1   | 0.30864197 | 95    | 0.27435237 |
| 9861  | GO:0016820              | hydrolase activity, acting on   | 0.59 | 2   | 0.61728394 | 212   | 0.612239   |
| 23515 | GO:0048037              | cofactor binding                | 0.59 | 3   | 0.9259259  | 327   | 0.94434977 |
| 9767  | GO:0016705              | oxidoreductase activity, actin  | 0.60 | 3   | 0.9259259  | 329   | 0.95012563 |
| 8495  | GO:0015077              | monovalent inorganic cation     | 0.60 | 2   | 0.61728394 | 214   | 0.6180149  |
| 17020 | GO:0034641              | cellular nitrogen compound n    | 0.63 | 33  | 10.185185  | 3678  | 10.621769  |
| 2668  | GO:0003779              | actin binding                   | 0.63 | 1   | 0.30864197 | 105   | 0.3032316  |
| 6426  | GO:0009057 GO:0043285   | macromolecule catabolic pro     | 0.63 | 1   | 0.30864197 | 106   | 0.3061195  |
| 11833 | GO:0019904              | protein domain specific bindi   | 0.64 | 1   | 0.30864197 | 109   | 0.31478328 |
| 19758 | GO:0043492              | ATPase activity, coupled to r   | 0.65 | 2   | 0.61728394 | 235   | 0.67866117 |
| 3626  | GO:0005083              | small GTPase regulator activ    | 0.65 | 1   | 0.30864197 | 111   | 0.3205591  |
| 5070  | GO:0007017              | microtubule-based process       | 0.65 | 1   | 0.30864197 | 112   | 0.32344702 |
| 5071  | GO:0007018              | microtubule-based movemen       | 0.65 | 1   | 0.30864197 | 112   | 0.32344702 |
| 9730  | GO:0016651              | oxidoreductase activity, actin  | 0.65 | 1   | 0.30864197 | 112   | 0.32344702 |
| 4906  | GO:0006807              | nitrogen compound metaboli      | 0.66 | 33  | 10.185185  | 3725  | 10.757502  |
| 30204 | GO:0071840              | cellular component organizat    | 0.66 | 3   | 0.9259259  | 362   | 1.045427   |
| 20619 | GO:0044425              | membrane part                   | 0.67 | 13  | 4.012346   | 1523  | 4.398302   |
| 9579  | GO:0016462              | pyrophosphatase activity        | 0.67 | 8   | 2.4691358  | 954   | 2.7550575  |
| 2660  | GO:0003735 GO:0003736 G | structural constituent of ribos | 0.67 | 2   | 0.61728394 | 246   | 0.7104283  |
| 9859  | GO:0016818              | hydrolase activity, acting on   | 0.67 | 8   | 2.4691358  | 956   | 2.7608514  |
| 9858  | GO:0016817              | hydrolase activity, acting on   | 0.68 | 8   | 2.4691358  | 959   | 2.769515   |
| 4612  | GO:0006468              | protein phosphorylation         | 0.68 | 19  | 5.8641977  | 2205  | 6.367863   |
| 9795  | GO:0016740              | transferase activity            | 0.68 | 33  | 10.185185  | 3764  | 10.870131  |
| 12805 | GO:0030246              | carbohydrate binding            | 0.68 | 2   | 0.61728394 | 251   | 0.7248679  |
| 12532 | GO:0022836              | gated channel activity          | 0.68 | 1   | 0.30864197 | 122   | 0.3523262  |
| 3260  | GO:0004620              | phospholipase activity          | 0.69 | 1   | 0.30864197 | 123   | 0.35521415 |
| 9812  | GO:0016758              | transferase activity, transfer  | 0.69 | 4   | 1.2345679  | 501   | 1.4468478  |
| 4121  | GO:0005856              | cytoskeleton                    | 0.69 | 1   | 0.30864197 | 126   | 0.3638779  |
| 8749  | GO:0015399              | primary active transmembran     | 0.70 | 2   | 0.61728394 | 260   | 0.75085914 |
| 8753  | GO:0015405              | P-P-bond-hydrolysis-driven t    | 0.70 | 2   | 0.61728394 | 260   | 0.75085914 |
| 9285  | GO:0016043              | cellular component organizat    | 0.70 | 2   | 0.61728394 | 261   | 0.7537471  |
| 3304  | GO:0004672 GO:0050222   | protein kinase activity         | 0.71 | 11  | 3.3950617  | 1333  | 3.8495927  |
| 4215  | GO:0005975              | carbohydrate metabolic proc     | 0.71 | 8   | 2.4691358  | 990   | 2.8590402  |
| 4394  | GO:0006184              | GTP catabolic process           | 0.71 | 1   | 0.30864197 | 132   | 0.3812054  |
| 21605 | GO:0046039              | GTP metabolic process           | 0.71 | 1   | 0.30864197 | 132   | 0.3812054  |
| 2758  | GO:0003924              | GTPase activity                 | 0.71 | 1   | 0.30864197 | 132   | 0.3812054  |
| 9754  | GO:0016684              | oxidoreductase activity, actin  | 0.72 | 1   | 0.30864197 | 135   | 0.38986918 |
| 3242  | GO:0004601 GO:0016685 G | peroxidase activity             | 0.72 | 1   | 0.30864197 | 135   | 0.38986918 |
| 4942  | GO:0008855              | drug transmembrane transpo      | 0.73 | 1   | 0.30864197 | 139   | 0.40142086 |
| 8642  | GO:0015238 GO:0015239 G | drug transmembrane transpo      | 0.73 | 1   | 0.30864197 | 139   | 0.40142086 |
| 9154  | GO:0015893              | drug transport                  | 0.73 | 1   | 0.30864197 | 139   | 0.40142086 |
| 18832 | GO:0042493 GO:0017035   | response to drug                | 0.73 | 1   | 0.30864197 | 139   | 0.40142086 |
| 3724  | GO:0005216              | ion channel activity            | 0.73 | 1   | 0.30864197 | 140   | 0.40430877 |
| 6046  | GO:0008610              | lipid biosynthetic process      | 0.74 | 1   | 0.30864197 | 141   | 0.4071967  |
| 8676  | GO:0015294              | solute:cation symporter activ   | 0.74 | 1   | 0.30864197 | 141   | 0.4071967  |
| 13164 | GO:0030695              | GTPase regulator activity       | 0.74 | 1   | 0.30864197 | 142   | 0.4100846  |
| 30205 | GO:0071841              | cellular component organizat    | 0.75 | 2   | 0.61728394 | 285   | 0.8230572  |
| 9829  | GO:0016779              | nucleotidyltransferase activi   | 0.75 | 1   | 0.30864197 | 148   | 0.42741212 |
| 7229  | GO:0009987 GO:0008151 G | cellular process                | 0.75 | 94  | 29.012346  | 10601 | 30.614838  |
| 9488  | GO:0016301              | kinase activity                 | 0.76 | 14  | 4.3209877  | 1740  | 5.0249805  |
| 20510 | GO:0044260 GO:0034960   | cellular macromolecule meta     | 0.76 | 48  | 14.814815  | 5577  | 16.105928  |
| 27562 | GO:0006058              | nucleoside-triphosphatase re    | 0.76 | 1   | 0.30864197 | 152   | 0.4389638  |
| 3888  | GO:0005529              | sugar binding                   | 0.77 | 1   | 0.30864197 | 158   | 0.45629135 |
| 19831 | GO:0043565              | sequence-specific DNA bindi     | 0.78 | 1   | 0.30864197 | 159   | 0.45917925 |
| 5764  | GO:0008234 GO:0004220   | cysteine-type peptidase activ   | 0.78 | 1   | 0.30864197 | 163   | 0.47073093 |
| 5055  | GO:0006996              | organelle organization          | 0.79 | 1   | 0.30864197 | 164   | 0.47361887 |
| 19526 | GO:0043227              | membrane-bound organel          | 0.79 | 17  | 5.2469134  | 2142  | 6.185924   |
| 19530 | GO:0043231              | intracellular membrane-boun     | 0.79 | 17  | 5.2469134  | 2142  | 6.185924   |
| 3200  | GO:0004553 GO:0016800   | hydrolase activity, hydrolyzin  | 0.79 | 2   | 0.61728394 | 312   | 0.90103096 |
| 6077  | GO:0008652              | cellular amino acid biosynthe   | 0.80 | 1   | 0.30864197 | 169   | 0.48805845 |
| 6899  | GO:0009628              | response to abiotic stimulus    | 0.80 | 1   | 0.30864197 | 170   | 0.49094638 |
| 9493  | GO:0016310              | phosphorylation                 | 0.80 | 20  | 6.1728396  | 2504  | 7.2313514  |
| 3156  | GO:0004497              | monooxygenase activity          | 0.80 | 1   | 0.30864197 | 172   | 0.49672222 |
| 4605  | GO:0006457 GO:0007022 G | protein folding                 | 0.80 | 1   | 0.30864197 | 173   | 0.49961013 |
| 8675  | GO:0015293              | symporter activity              | 0.80 | 1   | 0.30864197 | 173   | 0.49961013 |
| 4755  | GO:0006629              | lipid metabolic process         | 0.80 | 4   | 1.2345679  | 590   | 1.7038727  |
| 9823  | GO:0016772              | transferase activity, transfer  | 0.81 | 15  | 4.6296296  | 1932  | 5.579461   |
| 11522 | GO:0019538 GO:0006411   | protein metabolic process       | 0.81 | 34  | 10.493827  | 4134  | 11.938661  |
| 3904  | GO:0005576              | extracellular region            | 0.81 | 1   | 0.30864197 | 178   | 0.5140497  |
| 6663  | GO:0009309              | amine biosynthetic process      | 0.82 | 1   | 0.30864197 | 181   | 0.5227135  |
| 20488 | GO:0044238              | primary metabolic process       | 0.82 | 79  | 24.382715  | 9167  | 26.47356   |
| 5610  | GO:0008026              | ATP-dependent helicase acti     | 0.82 | 1   | 0.30864197 | 183   | 0.52848935 |
| 28401 | GO:0070035              | purine NTP-dependent helica     | 0.82 | 1   | 0.30864197 | 183   | 0.52848935 |
| 20505 | GO:0044255              | cellular lipid metabolic proces | 0.82 | 1   | 0.30864197 | 184   | 0.53137726 |
| 9486  | GO:0016298              | lipase activity                 | 0.83 | 1   | 0.30864197 | 185   | 0.53426516 |
| 9818  | GO:0016765 GO:0016766   | transferase activity, transfer  | 0.83 | 1   | 0.30864197 | 185   | 0.53426516 |
| 9824  | GO:0016773              | phosphotransferase activity, l  | 0.83 | 11  | 3.3950617  | 1493  | 4.311664   |
| 3068  | GO:0004386              | helicase activity               | 0.83 | 1   | 0.30864197 | 189   | 0.54581684 |
| 10058 | GO:0017111              | nucleoside-triphosphatase ac    | 0.83 | 6   | 1.8518518  | 878   | 2.5355935  |
| 30206 | GO:0071842              | cellular component organizat    | 0.84 | 1   | 0.30864197 | 193   | 0.5573685  |
| 2897  | GO:0004091 GO:0004302 G | carboxylesterase activity       | 0.84 | 1   | 0.30864197 | 194   | 0.5602564  |
| 20498 | GO:0044248              | cellular catabolic process      | 0.84 | 6   | 1.8518518  | 894   | 2.5818002  |
| 4405  | GO:0006195              | purine nucleotide catabolic p   | 0.85 | 5   | 1.5432099  | 773   | 2.232362   |
| 6508  | GO:0009143              | nucleoside triphosphate cata    | 0.85 | 5   | 1.5432099  | 773   | 2.232362   |
| 6509  | GO:0009144              | purine nucleoside triphospha    | 0.85 | 5   | 1.5432099  | 773   | 2.232362   |
| 6511  | GO:0009146              | purine nucleoside triphospha    | 0.85 | 5   | 1.5432099  | 773   | 2.232362   |
| 6519  | GO:0009154              | purine ribonucleotide catabol   | 0.85 | 5   | 1.5432099  | 773   | 2.232362   |
| 6530  | GO:0009166              | nucleotide catabolic process    | 0.85 | 5   | 1.5432099  | 773   | 2.232362   |
| 6567  | GO:0009203              | ribonucleoside triphosphate c   | 0.85 | 5   | 1.5432099  | 773   | 2.232362   |
| 6569  | GO:0009205              | purine ribonucleoside triphos   | 0.85 | 5   | 1.5432099  | 773   | 2.232362   |
| 6571  | GO:0009207              | purine ribonucleoside triphos   | 0.85 | 5   | 1.5432099  | 773   | 2.232362   |
| 6624  | GO:0009261              | ribonucleotide catabolic proc   | 0.85 | 5   | 1.5432099  | 773   | 2.232362   |
| 17034 | GO:0034655              | nucleobase, nucleoside, nucl    | 0.85 | 5   | 1.5432099  | 773   | 2.232362   |
| 17035 | GO:0034656              | nucleobase, nucleoside and l    | 0.85 | 5   | 1.5432099  | 773   | 2.232362   |
| 22209 | GO:0046700              | heterocycle catabolic proces    | 0.85 | 5   | 1.5432099  | 773   | 2.232362   |
| 30879 | GO:0072523              | purine-containing compound      | 0.85 | 5   | 1.5432099  | 773   | 2.232362   |
| 4408  | GO:0006200              | ATP catabolic process           | 0.85 | 4   | 1.2345679  | 641   | 1.8511566  |
| 9918  | GO:0016887 GO:0004002   | ATPase activity                 | 0.85 | 4   | 1.2345679  | 641   | 1.8511566  |
| 21600 | GO:0046034              | ATP metabolic process           | 0.85 | 4   | 1.2345679  | 641   | 1.8511566  |
| 9837  | GO:0016788              | hydrolase activity, acting on   | 0.85 | 11  | 3.3950617  | 1534  | 4.300069   |
| 20520 | GO:0044270              | cellular nitrogen compound c    | 0.85 | 5   | 1.5432099  | 777   | 2.2439137  |
| 2626  | GO:0003674 GO:0005554   | molecular function              | 0.86 | 220 | 67.90124   | 24394 | 70.447914  |
| 9295  | GO:0016053              | organic acid biosynthetic pro   | 0.86 | 1   | 0.30864197 | 211   | 0.6093511  |
| 21922 | GO:0046394              | carboxylic acid biosynthetic p  | 0.86 | 1   | 0.30864197 | 211   | 0.6093511  |
| 6563  | GO:0009199              | ribonucleoside triphosphate r   | 0.86 | 5   | 1.5432099  | 790   | 2.2814567  |
| 6425  | GO:0009056              | catabolic process               | 0.86 | 7   | 2.1604939  | 1051  | 3.0352037  |
| 6515  | GO:0009150              | purine ribonucleotide metabo    | 0.86 | 5   | 1.5432099  | 791   | 2.2843447  |
| 6506  | GO:0009141              | nucleoside triphosphate meta    | 0.87 | 5   | 1.5432099  | 796   | 2.2987843  |
| 4558  | GO:0006396 GO:0006394   | RNA processing                  | 0.87 | 1   | 0.30864197 | 219   | 0.63245445 |
| 12533 | GO:0022838              | substrate-specific channel ad   | 0.88 | 1   | 0.30864197 | 221   | 0.63823026 |

|       |                         |                                 |      |     |            |       |            |
|-------|-------------------------|---------------------------------|------|-----|------------|-------|------------|
| 4373  | GO:0006163              | purine nucleotide metabolic p   | 0.88 | 5   | 1.5432099  | 810   | 2.339215   |
| 26932 | GO:0055086              | nucleobase, nucleoside and      | 0.88 | 6   | 1.8518518  | 944   | 2.7261963  |
| 6622  | GO:0009259 GO:0009121   | ribonucleotide metabolic proc   | 0.88 | 5   | 1.5432099  | 812   | 2.344991   |
| 18953 | GO:0042623              | ATPase activity, coupled        | 0.88 | 3   | 0.9259259  | 537   | 1.550813   |
| 8660  | GO:0015267 GO:0015249   | channel activity                | 0.88 | 1   | 0.30864197 | 226   | 0.6526699  |
| 12515 | GO:0022803              | passive transmembrane tran      | 0.88 | 1   | 0.30864197 | 226   | 0.6526699  |
| 9913  | GO:0016881              | acid-amino acid ligase activi   | 0.88 | 2   | 0.61728394 | 391   | 1.1291766  |
| 4109  | GO:0005840 GO:0033279   | ribosome                        | 0.88 | 4   | 1.2345679  | 682   | 1.9695613  |
| 30877 | GO:0072521              | purine-containing compound      | 0.89 | 5   | 1.5432099  | 827   | 2.3883097  |
| 2628  | GO:0003677              | DNA binding                     | 0.89 | 8   | 2.4691358  | 1224  | 3.534814   |
| 9845  | GO:0016798              | hydrolase activity, acting on   | 0.89 | 2   | 0.61728394 | 401   | 1.1580559  |
| 11828 | GO:0019899              | enzyme binding                  | 0.89 | 1   | 0.30864197 | 237   | 0.684437   |
| 5712  | GO:0008168 GO:0004480   | methyltransferase activity      | 0.90 | 1   | 0.30864197 | 244   | 0.7046524  |
| 3885  | GO:0005525              | GTP binding                     | 0.90 | 1   | 0.30864197 | 245   | 0.70754033 |
| 11032 | GO:0019001              | guanyl nucleotide binding       | 0.90 | 1   | 0.30864197 | 245   | 0.70754033 |
| 14967 | GO:0032561              | guanyl ribonucleotide binding   | 0.90 | 1   | 0.30864197 | 245   | 0.70754033 |
| 20532 | GO:0044282              | small molecule catabolic pro    | 0.90 | 5   | 1.5432099  | 854   | 2.4662836  |
| 5661  | GO:0008092              | cytoskeletal protein binding    | 0.90 | 1   | 0.30864197 | 249   | 0.719092   |
| 3876  | GO:0005515 GO:0045308   | protein binding                 | 0.91 | 56  | 17.28395   | 6933  | 20.021948  |
| 9836  | GO:0016787              | hydrolase activity              | 0.91 | 28  | 8.641795   | 3723  | 10.751725  |
| 2674  | GO:0003824              | catalytic activity              | 0.91 | 90  | 27.777779  | 10750 | 31.045137  |
| 19525 | GO:0043226              | organelle                       | 0.91 | 22  | 6.7901235  | 3013  | 8.701303   |
| 19528 | GO:0043229              | intracellular organelle         | 0.91 | 22  | 6.7901235  | 3013  | 8.701303   |
| 4609  | GO:0006464              | protein modification process    | 0.91 | 20  | 6.1728396  | 2781  | 8.031305   |
| 9796  | GO:0016741              | transferase activity, transfer  | 0.91 | 1   | 0.30864197 | 261   | 0.7537471  |
| 13018 | GO:0030529              | ribonucleoprotein complex       | 0.92 | 4   | 1.2345679  | 741   | 2.1399486  |
| 9699  | GO:0016616              | oxidoreductase activity, actin  | 0.92 | 1   | 0.30864197 | 266   | 0.7681867  |
| 5705  | GO:0008152              | metabolic process               | 0.92 | 151 | 46.60494   | 17432 | 50.34222   |
| 4897  | GO:0006793              | phosphorus metabolic proces     | 0.92 | 21  | 6.4814816  | 2925  | 8.4471655  |
| 4900  | GO:0006796              | phosphate metabolic proces      | 0.92 | 21  | 6.4814816  | 2925  | 8.4471655  |
| 4649  | GO:0006520 GO:0006519   | cellular amino acid metabolic   | 0.93 | 1   | 0.30864197 | 277   | 0.7999538  |
| 3874  | GO:0005509              | calcium ion binding             | 0.93 | 1   | 0.30864197 | 279   | 0.8057296  |
| 9911  | GO:0016879              | ligase activity, forming carb   | 0.93 | 2   | 0.61728394 | 456   | 1.3168914  |
| 4867  | GO:0006753              | nucleoside phosphate metab      | 0.93 | 5   | 1.5432099  | 914   | 2.6395588  |
| 6484  | GO:0009117              | nucleotide metabolic process    | 0.93 | 5   | 1.5432099  | 914   | 2.6395588  |
| 14667 | GO:0032259              | methylation                     | 0.93 | 1   | 0.30864197 | 285   | 0.8230572  |
| 19527 | GO:0043228              | non-membrane-bounded org        | 0.93 | 5   | 1.5432099  | 923   | 2.66555    |
| 19531 | GO:0043232              | intracellular non-membrane-b    | 0.93 | 5   | 1.5432099  | 923   | 2.66555    |
| 3946  | GO:0005623              | cell                            | 0.94 | 66  | 20.37037   | 8227  | 23.758917  |
| 20657 | GO:0044464              | cell part                       | 0.94 | 66  | 20.37037   | 8227  | 23.758917  |
| 9697  | GO:0016614              | oxidoreductase activity, actin  | 0.94 | 1   | 0.30864197 | 293   | 0.84616053 |
| 20356 | GO:0044106              | cellular amine metabolic proc   | 0.94 | 1   | 0.30864197 | 303   | 0.8750397  |
| 19684 | GO:0043412              | macromolecule modification      | 0.94 | 20  | 6.1728396  | 2900  | 8.374968   |
| 9869  | GO:0016829              | lyase activity                  | 0.94 | 2   | 0.61728394 | 488   | 1.4093049  |
| 9889  | GO:0016853              | isomerase activity              | 0.94 | 1   | 0.30864197 | 306   | 0.8837035  |
| 6662  | GO:0009308              | amine metabolic process         | 0.95 | 1   | 0.30864197 | 314   | 0.9068068  |
| 4849  | GO:0006730 GO:0019753 G | one-carbon metabolic proces     | 0.95 | 1   | 0.30864197 | 325   | 0.93857396 |
| 3449  | GO:0004842 GO:0004840 G | ubiquitin-protein ligase activi | 0.95 | 1   | 0.30864197 | 326   | 0.94146186 |
| 18582 | GO:0042221              | response to chemical stimulu    | 0.95 | 1   | 0.30864197 | 328   | 0.94723773 |
| 9654  | GO:0016567              | protein ubiquitination          | 0.96 | 1   | 0.30864197 | 332   | 0.9587894  |
| 14854 | GO:0032446              | protein modification by small   | 0.96 | 1   | 0.30864197 | 332   | 0.9587894  |
| 29011 | GO:0070647              | protein modification by small   | 0.96 | 1   | 0.30864197 | 332   | 0.9587894  |
| 20517 | GO:0044267              | cellular protein metabolic pro  | 0.96 | 22  | 6.7901235  | 3225  | 9.313541   |
| 3903  | GO:0005575 GO:0008372   | cellular component              | 0.96 | 67  | 20.679012  | 8515  | 24.590637  |
| 11747 | GO:0019787 GO:0008639 G | small conjugating protein liga  | 0.96 | 1   | 0.30864197 | 339   | 0.9790048  |
| 20533 | GO:0044283              | small molecule biosynthetic p   | 0.96 | 1   | 0.30864197 | 347   | 1.0021082  |
| 20521 | GO:0044271              | cellular nitrogen compound b    | 0.97 | 1   | 0.30864197 | 367   | 1.0598665  |
| 4320  | GO:0006082              | organic acid metabolic proces   | 0.97 | 1   | 0.30864197 | 369   | 1.0656425  |
| 11716 | GO:0019752              | carboxylic acid metabolic pro   | 0.97 | 1   | 0.30864197 | 369   | 1.0656425  |
| 19707 | GO:0043436              | oxoacid metabolic process       | 0.97 | 1   | 0.30864197 | 369   | 1.0656425  |
| 18541 | GO:0042180              | cellular ketone metabolic pro   | 0.97 | 1   | 0.30864197 | 375   | 1.0829699  |
| 9839  | GO:0016791 GO:0016302   | phosphatase activity            | 0.97 | 1   | 0.30864197 | 383   | 1.1060733  |
| 9906  | GO:0016874              | ligase activity                 | 0.98 | 2   | 0.61728394 | 597   | 1.7240882  |
| 22007 | GO:0046483              | heterocycle metabolic proces    | 0.98 | 5   | 1.5432099  | 1094  | 3.1593843  |
| 9494  | GO:0016311              | dephosphorylation               | 0.98 | 1   | 0.30864197 | 425   | 1.227366   |
| 18912 | GO:0042578              | phosphoric ester hydrolase a    | 0.99 | 1   | 0.30864197 | 444   | 1.2822365  |
| 20487 | GO:0044237              | cellular metabolic process      | 0.99 | 59  | 18.209877  | 8185  | 23.637625  |
| 20618 | GO:0044424              | intracellular part              | 0.99 | 23  | 7.0987654  | 3853  | 11.127155  |
| 3945  | GO:0005622              | intracellular                   | 0.99 | 30  | 9.259259   | 4751  | 13.720507  |
| 20531 | GO:0044281              | small molecule metabolic pro    | 0.99 | 8   | 2.4691358  | 1788  | 5.1636004  |
| 19533 | GO:0043234              | protein complex                 | 1.00 | 2   | 0.61728394 | 848   | 2.448956   |
| 3863  | GO:0005488              | binding                         | 1.00 | 106 | 32.71605   | 13903 | 40.15075   |
| 15392 | GO:0032991              | macromolecular complex          | 1.00 | 6   | 1.8518518  | 1616  | 4.666878   |
| 2627  | GO:0003676              | nucleic acid binding            | 1.00 | 11  | 3.3950617  | 2453  | 7.0840673  |
| 20640 | GO:0044446              | intracellular organelle part    | 1.00 | 1   | 0.30864197 | 710   | 2.0504231  |
| 20616 | GO:0044422              | organelle part                  | 1.00 | 1   | 0.30864197 | 712   | 2.0561988  |
| 131   | GO:0000166              | nucleotide binding              | 1.00 | 3   | 0.9259259  | 1213  | 3.5030468  |
| 18000 | GO:0035639              | purine ribonucleoside triphos   | 1.00 | 1   | 0.30864197 | 769   | 2.2208104  |
| 14959 | GO:0032553              | ribonucleotide binding          | 1.00 | 1   | 0.30864197 | 795   | 2.2958963  |
| 14961 | GO:0032555              | purine ribonucleotide binding   | 1.00 | 1   | 0.30864197 | 795   | 2.2958963  |
| 10033 | GO:0017076              | purine nucleotide binding       | 1.00 | 1   | 0.30864197 | 797   | 2.3016722  |
| 2653  | GO:0003723              | RNA binding                     | 1.00 | 1   | 0.30864197 | 797   | 2.3016722  |
| 20638 | GO:0044444              | cytoplasmic part                | 1.00 | 4   | 1.2345679  | 1644  | 4.7477403  |
| 4027  | GO:0005737              | cytoplasm                       | 1.00 | 4   | 1.2345679  | 2001  | 5.7787275  |



| GO ID | GO ACCESSION | GO Term                      | p-value | Count in Selection | % Count in Selection | Count in Total | % Count in Total |
|-------|--------------|------------------------------|---------|--------------------|----------------------|----------------|------------------|
| 12946 | GO:0030414   | peptidase inhibitor activity | 0.00    | 12                 | 2.6200874            | 110            | 0.31767118       |
| 7690  | GO:0010466   | negative regulation of pep   | 0.00    | 12                 | 2.6200874            | 110            | 0.31767118       |
| 25636 | GO:0051346   | negative regulation of hvc   | 0.00    | 12                 | 2.6200874            | 110            | 0.31767118       |
| 26711 | GO:0052547   | regulation of peptidase ac   | 0.00    | 12                 | 2.6200874            | 112            | 0.32344702       |
| 28100 | GO:0061134   | peptidase regulator activit  | 0.00    | 12                 | 2.6200874            | 112            | 0.32344702       |
| 26712 | GO:0052548   | regulation of endopeptida    | 0.00    | 11                 | 2.4017467            | 95             | 0.27435237       |
| 3472  | GO:0004866   | endopeptidase inhibitor ac   | 0.00    | 11                 | 2.4017467            | 95             | 0.27435237       |
| 28101 | GO:0061135   | endopeptidase regulator a    | 0.00    | 11                 | 2.4017467            | 95             | 0.27435237       |
| 8159  | GO:0010951   | negative regulation of end   | 0.00    | 11                 | 2.4017467            | 95             | 0.27435237       |
| 3464  | GO:0004857   | enzyme inhibitor activity    | 0.00    | 13                 | 2.838428             | 157            | 0.4534034        |
| 25626 | GO:0051336   | regulation of hydrolase ac   | 0.00    | 14                 | 3.0567687            | 196            | 0.5660323        |
| 9869  | GO:0016829   | lyase activity               | 0.00    | 22                 | 4.8034935            | 488            | 1.4093049        |
| 4215  | GO:0005975   | carbohydrate metabolic pr    | 0.00    | 33                 | 7.2052402            | 990            | 2.8590407        |
| 19393 | GO:0043086   | negative regulation of cat   | 0.00    | 13                 | 2.838428             | 188            | 0.54292893       |
| 20342 | GO:0044092   | negative regulation of mol   | 0.00    | 13                 | 2.838428             | 188            | 0.54292893       |
| 4320  | GO:0006082   | organic acid metabolic pro   | 0.00    | 17                 | 3.7117903            | 369            | 1.0656425        |
| 11716 | GO:0019752   | carboxylic acid metabolic    | 0.00    | 17                 | 3.7117903            | 369            | 1.0656425        |
| 19707 | GO:0043436   | oxoacid metabolic proces     | 0.00    | 17                 | 3.7117903            | 369            | 1.0656425        |
| 18541 | GO:0042180   | cellular ketone metabolic    | 0.00    | 17                 | 3.7117903            | 375            | 1.0829699        |
| 9816  | GO:0016762   | xyloglucan:xyloglucosyl tr   | 0.00    | 5                  | 1.091703             | 27             | 0.077973835      |
| 3473  | GO:0004867   | serine-type endopeptidase    | 0.00    | 7                  | 1.5283843            | 66             | 0.1906027        |
| 5704  | GO:0008150   | biological process           | 0.00    | 334                | 72.925766            | 22215          | 64.155136        |
| 9845  | GO:0016798   | hydrolase activity, acting   | 0.00    | 16                 | 3.4934497            | 401            | 1.1580559        |
| 5705  | GO:0008152   | metabolic process            | 0.00    | 270                | 58.951965            | 17432          | 50.34222         |
| 26845 | GO:0052689   | carboxylic ester hydrolase   | 0.00    | 19                 | 4.148472             | 538            | 1.5537009        |
| 2674  | GO:0003824   | catalytic activity           | 0.00    | 179                | 39.08297             | 10750          | 31.045137        |
| 9812  | GO:0016758   | transferase activity, transf | 0.00    | 18                 | 3.930131             | 501            | 1.4468478        |
| 2864  | GO:0004058   | aromatic-L-amino-acid de     | 0.00    | 3                  | 0.65502185           | 9              | 0.025991278      |
| 5636  | GO:0008061   | chitin binding               | 0.00    | 4                  | 0.8733624            | 23             | 0.06642216       |
| 25095 | GO:0050790   | regulation of catalytic acti | 0.00    | 17                 | 3.7117903            | 480            | 1.3862015        |
| 28366 | GO:0065009   | regulation of molecular fu   | 0.00    | 17                 | 3.7117903            | 484            | 1.3977532        |
| 9811  | GO:0016757   | transferase activity, transf | 0.00    | 22                 | 4.8034935            | 729            | 2.1052935        |
| 3874  | GO:0005509   | calcium ion binding          | 0.00    | 12                 | 2.6200874            | 279            | 0.8057296        |
| 9877  | GO:0016838   | carbon-oxygen lyase activ    | 0.00    | 6                  | 1.3100437            | 77             | 0.22236982       |
| 13082 | GO:0030599   | pectinesterase activity      | 0.00    | 9                  | 1.9650655            | 178            | 0.5140497        |
| 7557  | GO:0010333   | terpene synthase activity    | 0.00    | 5                  | 1.091703             | 57             | 0.16461143       |
| 3291  | GO:0004657   | proline dehydrogenase ac     | 0.00    | 2                  | 0.4366812            | 4              | 0.011551679      |
| 12794 | GO:0030234   | enzyme regulator activity    | 0.00    | 14                 | 3.0567687            | 403            | 1.1638317        |
| 1169  | GO:0001871   | pattern binding              | 0.00    | 4                  | 0.8733624            | 35             | 0.10107719       |
| 12806 | GO:0030247   | polysaccharide binding       | 0.00    | 4                  | 0.8733624            | 35             | 0.10107719       |
| 9393  | GO:0016165   | lipoxigenase activity        | 0.00    | 4                  | 0.8733624            | 36             | 0.10396511       |
| 4232  | GO:0005992   | trehalose biosynthetic pro   | 0.00    | 4                  | 0.8733624            | 36             | 0.10396511       |
| 9870  | GO:0016830   | carbon-carbon lyase activ    | 0.00    | 8                  | 1.7467248            | 161            | 0.4649551        |
| 17016 | GO:0034637   | cellular carbohydrate bios   | 0.00    | 5                  | 1.091703             | 63             | 0.18193895       |
| 4231  | GO:0005991   | trehalose metabolic proces   | 0.00    | 4                  | 0.8733624            | 38             | 0.10974095       |
| 9293  | GO:0016051   | carbohydrate biosynthetic    | 0.00    | 5                  | 1.091703             | 64             | 0.18482687       |
| 20512 | GO:0044262   | cellular carbohydrate met    | 0.00    | 10                 | 2.183406             | 248            | 0.7162041        |
| 26959 | GO:0055114   | oxidation-reduction proces   | 0.00    | 50                 | 10.91703             | 2490           | 7.1909204        |
| 3124  | GO:0004462   | lactoylglutathione lyase ac  | 0.00    | 3                  | 0.65502185           | 20             | 0.0577584        |
| 21880 | GO:0046351   | disaccharide biosynthetic    | 0.00    | 4                  | 0.8733624            | 42             | 0.121292636      |
| 6666  | GO:0009312   | oligosaccharide biosynthe    | 0.00    | 4                  | 0.8733624            | 42             | 0.121292636      |
| 9370  | GO:0016138   | glycoside biosynthetic pro   | 0.00    | 4                  | 0.8733624            | 42             | 0.121292636      |
| 3129  | GO:0004467   | long-chain fatty acid-CoA    | 0.00    | 3                  | 0.65502185           | 21             | 0.060646318      |
| 9764  | GO:0016701   | oxidoreductase activity, a   | 0.00    | 5                  | 1.091703             | 72             | 0.20793022       |
| 9600  | GO:0016491   | oxidoreductase activity      | 0.00    | 37                 | 8.078603             | 1724           | 4.9787736        |
| 25510 | GO:0051213   | dioxygenase activity         | 0.00    | 5                  | 1.091703             | 75             | 0.21659398       |
| 31394 | GO:0080017   | alpha-humulene synthase      | 0.00    | 3                  | 0.65502185           | 25             | 0.072197996      |
| 31393 | GO:0080016   | (-)-E-beta-caryophyllene s   | 0.00    | 3                  | 0.65502185           | 25             | 0.072197996      |
| 9871  | GO:0016831   | carboxy-lyase activity       | 0.00    | 6                  | 1.3100437            | 115            | 0.3321108        |
| 7168  | GO:0009916   | alternative oxidase activit  | 0.00    | 2                  | 0.4366812            | 8              | 0.023103358      |
| 3415  | GO:0004805   | trehalose-phosphatase ac     | 0.00    | 3                  | 0.65502185           | 26             | 0.075085916      |
| 8919  | GO:0015645   | fatty acid ligase activity   | 0.01    | 3                  | 0.65502185           | 27             | 0.077973835      |
| 9883  | GO:0016846   | carbon-sulfur lyase activit  | 0.01    | 4                  | 0.8733624            | 56             | 0.16172351       |
| 4224  | GO:0005984   | disaccharide metabolic pr    | 0.01    | 4                  | 0.8733624            | 56             | 0.16172351       |
| 9369  | GO:0016137   | glycoside metabolic proces   | 0.01    | 4                  | 0.8733624            | 56             | 0.16172351       |
| 7558  | GO:0010334   | sesquiterpene synthase a     | 0.01    | 3                  | 0.65502185           | 29             | 0.083749674      |
| 12805 | GO:0030246   | carbohydrate binding         | 0.01    | 9                  | 1.9650655            | 251            | 0.7248679        |
| 21331 | GO:0045735   | nutrient reservoir activity  | 0.01    | 5                  | 1.091703             | 89             | 0.25702485       |
| 28643 | GO:0070279   | vitamin B6 binding           | 0.01    | 6                  | 1.3100437            | 126            | 0.3638779        |
| 12741 | GO:0030170   | pyridoxal phosphate bindi    | 0.01    | 6                  | 1.3100437            | 126            | 0.3638779        |
| 6665  | GO:0009311   | oligosaccharide metabolic    | 0.01    | 4                  | 0.8733624            | 58             | 0.16749935       |
| 6464  | GO:0009095   | aromatic amino acid fami     | 0.01    | 2                  | 0.4366812            | 10             | 0.0288792        |
| 21148 | GO:0045547   | dehydrodolicyl diphosph      | 0.01    | 2                  | 0.4366812            | 10             | 0.0288792        |
| 7222  | GO:0009975   | cyclase activity             | 0.01    | 3                  | 0.65502185           | 31             | 0.08952551       |
| 4250  | GO:0006012   | galactose metabolic proces   | 0.01    | 2                  | 0.4366812            | 11             | 0.03176712       |
| 11787 | GO:0019842   | vitamin binding              | 0.01    | 7                  | 1.5283843            | 177            | 0.5111618        |
| 11206 | GO:0019203   | carbohydrate phosphatase     | 0.01    | 3                  | 0.65502185           | 35             | 0.10107719       |
| 11311 | GO:0019318   | hexose metabolic process     | 0.01    | 5                  | 1.091703             | 101            | 0.2916799        |
| 9765  | GO:0016702   | oxidoreductase activity, a   | 0.01    | 4                  | 0.8733624            | 66             | 0.1906027        |
| 23515 | GO:0048037   | cofactor binding             | 0.01    | 10                 | 2.183406             | 327            | 0.94434977       |
| 11224 | GO:0019222   | regulation of metabolic pr   | 0.02    | 55                 | 12.008734            | 3115           | 8.995871         |
| 9874  | GO:0016835   | carbon-oxygen lyase activ    | 0.02    | 7                  | 1.5283843            | 202            | 0.5833598        |
| 31396 | GO:0080019   | fatty-acyl-CoA reductase     | 0.02    | 2                  | 0.4366812            | 16             | 0.046206716      |
| 9909  | GO:0016877   | liqase activity, forming ca  | 0.02    | 4                  | 0.8733624            | 78             | 0.22525774       |
| 9753  | GO:0016682   | oxidoreductase activity, a   | 0.02    | 3                  | 0.65502185           | 44             | 0.12706847       |
| 4954  | GO:0006869   | lipid transport              | 0.02    | 7                  | 1.5283843            | 208            | 0.6006873        |
| 8085  | GO:0010876   | lipid localization           | 0.02    | 7                  | 1.5283843            | 208            | 0.6006873        |
| 9837  | GO:0016788   | hydrolase activity, acting   | 0.02    | 30                 | 6.5502185            | 1534           | 4.430069         |
| 28368 | GO:0070001   | aspartic-type peptidase ac   | 0.02    | 2                  | 0.4366812            | 18             | 0.051982556      |
| 2981  | GO:0004190   | aspartic-type endopeptida    | 0.02    | 2                  | 0.4366812            | 18             | 0.051982556      |
| 4236  | GO:0005996   | monosaccharide metaboli      | 0.03    | 5                  | 1.091703             | 125            | 0.36099          |
| 4699  | GO:0006570   | tyrosine metabolic proces    | 0.03    | 1                  | 0.2183406            | 2              | 0.00577584       |
| 4700  | GO:0006571   | tyrosine biosynthetic proc   | 0.03    | 1                  | 0.2183406            | 2              | 0.00577584       |
| 21946 | GO:0046421   | methylisocitrate lyase act   | 0.03    | 1                  | 0.2183406            | 2              | 0.00577584       |
| 192   | GO:0000249   | C-22 sterol desaturase ac    | 0.03    | 1                  | 0.2183406            | 2              | 0.00577584       |
| 532   | GO:0000823   | inositol trisphosphate 6-ki  | 0.03    | 1                  | 0.2183406            | 2              | 0.00577584       |
| 3113  | GO:0004451   | isocitrate lyase activity    | 0.03    | 1                  | 0.2183406            | 2              | 0.00577584       |
| 9725  | GO:0016645   | oxidoreductase activity, a   | 0.03    | 3                  | 0.65502185           | 49             | 0.14150807       |
| 8726  | GO:0015368   | calcium:cation antiporter a  | 0.03    | 2                  | 0.4366812            | 20             | 0.0577584        |
| 3293  | GO:0004659   | prenyltransferase activity   | 0.03    | 3                  | 0.65502185           | 51             | 0.14728391       |
| 3904  | GO:0005576   | extracellular region         | 0.03    | 6                  | 1.3100437            | 178            | 0.5140497        |
| 9750  | GO:0016679   | oxidoreductase activity, a   | 0.03    | 3                  | 0.65502185           | 53             | 0.15305975       |
| 8489  | GO:0015066   | alpha-amylase inhibitor ac   | 0.03    | 2                  | 0.4366812            | 22             | 0.06353424       |
| 24858 | GO:0050551   | myrcene synthase activity    | 0.03    | 2                  | 0.4366812            | 22             | 0.06353424       |
| 5702  | GO:0008146   | sulfotransferase activity    | 0.03    | 3                  | 0.65502185           | 54             | 0.15594767       |
| 22414 | GO:0046912   | transferase activity, transf | 0.04    | 2                  | 0.4366812            | 23             | 0.06642216       |
| 4319  | GO:0006081   | cellular aldehyde metabol    | 0.04    | 1                  | 0.2183406            | 3              | 0.00866376       |

|       |                       |                              |      |     |            |       |             |
|-------|-----------------------|------------------------------|------|-----|------------|-------|-------------|
| 4330  | GO:0006097            | glyoxylate cycle             | 0.04 | 1   | 0.2183406  | 3     | 0.00866376  |
| 13651 | GO:0031219            | levanase activity            | 0.04 | 1   | 0.2183406  | 3     | 0.00866376  |
| 22011 | GO:0046487            | glyoxylate metabolic proc    | 0.04 | 1   | 0.2183406  | 3     | 0.00866376  |
| 3134  | GO:0004474            | malate synthase activity     | 0.04 | 1   | 0.2183406  | 3     | 0.00866376  |
| 3252  | GO:0004612            | phosphoenolpyruvate car      | 0.04 | 1   | 0.2183406  | 3     | 0.00866376  |
| 9779  | GO:0016717            | oxidoreductase activity, a   | 0.04 | 2   | 0.4366812  | 24    | 0.06931008  |
| 25094 | GO:0050789 GO:005079  | regulation of biological pr  | 0.04 | 70  | 15.283843  | 4315  | 12.461374   |
| 4304  | GO:0006066            | alcohol metabolic process    | 0.04 | 5   | 1.091703   | 143   | 0.41297254  |
| 31493 | GO:0080118            | brassinosteroid sulfotrans   | 0.04 | 2   | 0.4366812  | 25    | 0.072197996 |
| 2897  | GO:0004091 GO:0004302 | carboxylesterase activity    | 0.04 | 6   | 1.3100437  | 194   | 0.5602564   |
| 17147 | GO:0034768            | (E)-beta-ocimene synthas     | 0.05 | 2   | 0.4366812  | 26    | 0.075085916 |
| 4328  | GO:0006094            | gluconeogenesis              | 0.05 | 1   | 0.2183406  | 4     | 0.011551679 |
| 5928  | GO:0008440            | inositol trisphosphate 3-ki  | 0.05 | 1   | 0.2183406  | 4     | 0.011551679 |
| 7157  | GO:0009905            | ent-copalyl diphosphate s    | 0.05 | 1   | 0.2183406  | 4     | 0.011551679 |
| 9905  | GO:0016872            | intramolecular lyase activ   | 0.05 | 1   | 0.2183406  | 4     | 0.011551679 |
| 11312 | GO:0019319            | hexose biosynthetic proce    | 0.05 | 1   | 0.2183406  | 4     | 0.011551679 |
| 16391 | GO:0034007            | S-linalool synthase activit  | 0.05 | 1   | 0.2183406  | 4     | 0.011551679 |
| 22059 | GO:0046538            | 2,3-bisphosphoglycerate-t    | 0.05 | 1   | 0.2183406  | 4     | 0.011551679 |
| 23251 | GO:0047769            | arogenate dehydratase ac     | 0.05 | 1   | 0.2183406  | 4     | 0.011551679 |
| 23923 | GO:0048531            | beta-1,3-galactosyltransfe   | 0.05 | 1   | 0.2183406  | 4     | 0.011551679 |
| 24433 | GO:0050113            | inositol oxygenase activity  | 0.05 | 1   | 0.2183406  | 4     | 0.011551679 |
| 26048 | GO:0051766            | inositol trisphosphate kina  | 0.05 | 1   | 0.2183406  | 4     | 0.011551679 |
| 2796  | GO:0003978            | UDP-glucose 4-epimerase      | 0.05 | 1   | 0.2183406  | 4     | 0.011551679 |
| 2829  | GO:0004020            | adenylsulfate kinase acti    | 0.05 | 1   | 0.2183406  | 4     | 0.011551679 |
| 2872  | GO:0004066            | asparagine synthase (glut    | 0.05 | 1   | 0.2183406  | 4     | 0.011551679 |
| 3093  | GO:0004421            | hydroxymethylglutaryl-Co     | 0.05 | 1   | 0.2183406  | 4     | 0.011551679 |
| 28364 | GO:0065007            | biological regulation        | 0.05 | 70  | 15.283843  | 4376  | 12.637537   |
| 11829 | GO:0019900            | kinase binding               | 0.06 | 3   | 0.65502185 | 66    | 0.1906027   |
| 3888  | GO:0005529            | sugar binding                | 0.06 | 5   | 1.091703   | 158   | 0.45629135  |
| 6216  | GO:0008810            | cellulase activity           | 0.06 | 2   | 0.4366812  | 30    | 0.086637594 |
| 2870  | GO:0004064            | arylesterase activity        | 0.06 | 2   | 0.4366812  | 30    | 0.086637594 |
| 14422 | GO:0032012            | regulation of ARF protein    | 0.06 | 2   | 0.4366812  | 31    | 0.08952551  |
| 14720 | GO:0032312            | regulation of ARF GTPase     | 0.06 | 2   | 0.4366812  | 31    | 0.08952551  |
| 20908 | GO:0045290            | D-arabinose 1-dehydroge      | 0.06 | 1   | 0.2183406  | 5     | 0.0144396   |
| 23522 | GO:0048046            | apoplast                     | 0.07 | 3   | 0.65502185 | 70    | 0.20215438  |
| 22049 | GO:0046527            | glucosyltransferase activi   | 0.07 | 7   | 1.5283843  | 270   | 0.77973837  |
| 24966 | GO:0050660            | flavin adenine dinucleotid   | 0.07 | 4   | 0.8733624  | 118   | 0.34077454  |
| 2985  | GO:0004222            | metalloendopeptidase act     | 0.07 | 2   | 0.4366812  | 34    | 0.09818927  |
| 9832  | GO:0016782            | transferase activity, trans  | 0.08 | 3   | 0.65502185 | 74    | 0.21370606  |
| 11776 | GO:0019825            | oxygen binding               | 0.08 | 9   | 1.9650655  | 389   | 1.1234008   |
| 2626  | GO:0003674 GO:000555  | molecular function           | 0.08 | 337 | 73.58079   | 24394 | 70.447914   |
| 20531 | GO:0044281            | small molecule metabolic     | 0.08 | 31  | 6.768559   | 1788  | 5.1636004   |
| 3845  | GO:0005452            | inorganic anion exchange     | 0.08 | 1   | 0.2183406  | 6     | 0.01732752  |
| 4657  | GO:0006528            | asparagine metabolic pro     | 0.08 | 1   | 0.2183406  | 6     | 0.01732752  |
| 4658  | GO:0006529            | asparagine biosynthetic p    | 0.08 | 1   | 0.2183406  | 6     | 0.01732752  |
| 5966  | GO:0008486            | diphosphoinositol-polyph     | 0.08 | 1   | 0.2183406  | 6     | 0.01732752  |
| 6317  | GO:0008923            | lysine decarboxylase activ   | 0.08 | 1   | 0.2183406  | 6     | 0.01732752  |
| 11899 | GO:0019992            | diacylglycerol binding       | 0.08 | 1   | 0.2183406  | 6     | 0.01732752  |
| 13471 | GO:0031012            | extracellular matrix         | 0.08 | 1   | 0.2183406  | 6     | 0.01732752  |
| 19761 | GO:0043495            | protein anchor               | 0.08 | 1   | 0.2183406  | 6     | 0.01732752  |
| 21727 | GO:0046165            | alcohol biosynthetic proce   | 0.08 | 1   | 0.2183406  | 6     | 0.01732752  |
| 21893 | GO:0046364            | monosaccharide biosynth      | 0.08 | 1   | 0.2183406  | 6     | 0.01732752  |
| 23230 | GO:0047746            | chlorophyllase activity      | 0.08 | 1   | 0.2183406  | 6     | 0.01732752  |
| 135   | GO:0000170            | sphingosine hydroxylase      | 0.08 | 1   | 0.2183406  | 6     | 0.01732752  |
| 3259  | GO:0004619            | phosphoglycerate mutase      | 0.08 | 1   | 0.2183406  | 6     | 0.01732752  |
| 21146 | GO:0045544            | gibberellin 20-oxidase act   | 0.08 | 2   | 0.4366812  | 35    | 0.10107719  |
| 9836  | GO:0016787            | hydrolase activity           | 0.08 | 59  | 12.882096  | 3723  | 10.751725   |
| 8501  | GO:0015085            | calcium ion transmembran     | 0.09 | 2   | 0.4366812  | 38    | 0.10974095  |
| 15189 | GO:0032787            | monocarboxylic acid meta     | 0.09 | 3   | 0.65502185 | 81    | 0.23392151  |
| 9486  | GO:0016298            | lipase activity              | 0.10 | 5   | 1.091703   | 185   | 0.53426516  |
| 4687  | GO:0006558            | L-phenylalanine metabolic    | 0.10 | 1   | 0.2183406  | 8     | 0.023103358 |
| 6378  | GO:0008999            | ribosomal-protein-alanine    | 0.10 | 1   | 0.2183406  | 8     | 0.023103358 |
| 6463  | GO:0009094 GO:0019274 | L-phenylalanine biosynthe    | 0.10 | 1   | 0.2183406  | 8     | 0.023103358 |
| 9680  | GO:0016595            | glutamate binding            | 0.10 | 1   | 0.2183406  | 8     | 0.023103358 |
| 18639 | GO:0042284            | sphingolipid delta-4 desat   | 0.10 | 1   | 0.2183406  | 8     | 0.023103358 |
| 29068 | GO:0070704            | sterol desaturase activity   | 0.10 | 1   | 0.2183406  | 8     | 0.023103358 |
| 3098  | GO:0004427            | inorganic diphosphatase      | 0.10 | 1   | 0.2183406  | 8     | 0.023103358 |
| 4246  | GO:0006006            | glucose metabolic proces     | 0.11 | 3   | 0.65502185 | 87    | 0.25124902  |
| 5694  | GO:0008137            | NADH dehydrogenase (ub       | 0.11 | 2   | 0.4366812  | 43    | 0.124180555 |
| 119   | GO:0000151            | ubiquitin ligase complex     | 0.11 | 3   | 0.65502185 | 88    | 0.25413695  |
| 79    | GO:0001031 GO:0019378 | sulfate assimilation         | 0.11 | 1   | 0.2183406  | 9     | 0.025991278 |
| 3251  | GO:0004611            | phosphoenolpyruvate car      | 0.11 | 1   | 0.2183406  | 9     | 0.025991278 |
| 4914  | GO:0006816            | calcium ion transport        | 0.11 | 2   | 0.4366812  | 44    | 0.12706847  |
| 28952 | GO:0070588            | calcium ion transmembran     | 0.11 | 2   | 0.4366812  | 44    | 0.12706847  |
| 2642  | GO:0003697 GO:0003698 | single-stranded DNA bind     | 0.11 | 2   | 0.4366812  | 44    | 0.12706847  |
| 11931 | GO:0020037            | heme binding                 | 0.12 | 11  | 2.4017467  | 550   | 1.5883559   |
| 9893  | GO:0016857            | racemase and epimerase       | 0.12 | 2   | 0.4366812  | 45    | 0.1299564   |
| 14726 | GO:0032318            | regulation of Ras GTPase     | 0.12 | 2   | 0.4366812  | 45    | 0.1299564   |
| 22096 | GO:0046578            | regulation of Ras protein    | 0.12 | 2   | 0.4366812  | 45    | 0.1299564   |
| 24456 | GO:0050136            | NADH dehydrogenase (gl       | 0.12 | 2   | 0.4366812  | 45    | 0.1299564   |
| 25355 | GO:0051056            | regulation of small GTPas    | 0.12 | 2   | 0.4366812  | 45    | 0.1299564   |
| 4329  | GO:0006096 GO:001964  | glycolysis                   | 0.12 | 2   | 0.4366812  | 46    | 0.13284431  |
| 2636  | GO:0003690            | double-stranded DNA bind     | 0.12 | 2   | 0.4366812  | 46    | 0.13284431  |
| 3842  | GO:0005432            | calcium:sodium antiporter    | 0.12 | 1   | 0.2183406  | 10    | 0.0288792   |
| 3849  | GO:0005459            | UDP-galactose transmem       | 0.12 | 1   | 0.2183406  | 10    | 0.0288792   |
| 5911  | GO:0008417            | fucosyltransferase activi    | 0.12 | 1   | 0.2183406  | 10    | 0.0288792   |
| 7175  | GO:0009924            | octadecanal decarboxylas     | 0.12 | 1   | 0.2183406  | 10    | 0.0288792   |
| 8727  | GO:0015369            | calcium:hydrogen antiport    | 0.12 | 1   | 0.2183406  | 10    | 0.0288792   |
| 9054  | GO:0015785            | UDP-galactose transport      | 0.12 | 1   | 0.2183406  | 10    | 0.0288792   |
| 30135 | GO:0071771            | aldehyde decarboxylase       | 0.12 | 1   | 0.2183406  | 10    | 0.0288792   |
| 30693 | GO:0072334            | UDP-galactose transmem       | 0.12 | 1   | 0.2183406  | 10    | 0.0288792   |
| 2797  | GO:0003979            | UDP-glucose 6-dehydroge      | 0.12 | 1   | 0.2183406  | 10    | 0.0288792   |
| 6442  | GO:0009073 GO:0016089 | aromatic amino acid famill   | 0.13 | 2   | 0.4366812  | 47    | 0.13573223  |
| 21943 | GO:0046417            | chorismate metabolic pro     | 0.13 | 2   | 0.4366812  | 47    | 0.13573223  |
| 5809  | GO:0008289            | lipid binding                | 0.13 | 6   | 1.3100437  | 258   | 0.74508333  |
| 3872  | GO:0005506            | iron ion binding             | 0.13 | 11  | 2.4017467  | 563   | 1.6258988   |
| 716   | GO:0001071            | nucleic acid binding trans   | 0.13 | 24  | 5.240175   | 1417  | 4.0921826   |
| 2643  | GO:0003700 GO:0000130 | sequence-specific DNA bi     | 0.13 | 24  | 5.240175   | 1417  | 4.0921826   |
| 11152 | GO:0019139 GO:0046420 | cytokinin dehydrogenase      | 0.14 | 1   | 0.2183406  | 11    | 0.03176712  |
| 24696 | GO:0050378            | UDP-glucuronate 4-epime      | 0.14 | 1   | 0.2183406  | 11    | 0.03176712  |
| 3490  | GO:0004888 GO:0004926 | transmembrane receptor       | 0.14 | 11  | 2.4017467  | 571   | 1.6490022   |
| 5096  | GO:0007047            | cellular cell wall organiz   | 0.14 | 2   | 0.4366812  | 50    | 0.14439599  |
| 6932  | GO:0009664            | plant-type cell wall organiz | 0.14 | 2   | 0.4366812  | 50    | 0.14439599  |
| 19914 | GO:0043648            | dicarboxylic acid metabol    | 0.14 | 2   | 0.4366812  | 50    | 0.14439599  |
| 20857 | GO:0045229            | external encapsulating str   | 0.14 | 2   | 0.4366812  | 50    | 0.14439599  |
| 30033 | GO:0071669            | plant-type cell wall organiz | 0.14 | 2   | 0.4366812  | 50    | 0.14439599  |
| 7173  | GO:0009922            | fatty acid elongase activi   | 0.15 | 2   | 0.4366812  | 51    | 0.14728391  |
| 7213  | GO:0009966 GO:0035466 | regulation of signal trans   | 0.15 | 2   | 0.4366812  | 51    | 0.14728391  |
| 9733  | GO:0016655            | oxidoreductase activity, a   | 0.15 | 2   | 0.4366812  | 51    | 0.14728391  |
| 12601 | GO:0023051            | regulation of signaling      | 0.15 | 2   | 0.4366812  | 51    | 0.14728391  |
| 7526  | GO:0010301 GO:0033710 | xanthoxin dehydrogenase      | 0.15 | 1   | 0.2183406  | 12    | 0.03465504  |
| 20615 | GO:0044421            | extracellular region part    | 0.15 | 1   | 0.2183406  | 12    | 0.03465504  |



|       |                       |                              |      |    |            |      |             |
|-------|-----------------------|------------------------------|------|----|------------|------|-------------|
| 25436 | GO:0051139            | metal ion:hydrogen antip     | 0.15 | 1  | 0.2183406  | 12   | 0.03465504  |
| 9767  | GO:0016705            | oxidoreductase activity, a   | 0.15 | 7  | 1.5283843  | 329  | 0.95012563  |
| 9295  | GO:0016053            | organic acid biosynthetic    | 0.15 | 5  | 1.091703   | 211  | 0.6093511   |
| 21922 | GO:0046394            | carboxylic acid biosynthe    | 0.15 | 5  | 1.091703   | 211  | 0.6093511   |
| 9795  | GO:0016740            | transferase activity         | 0.16 | 57 | 12.445415  | 3764 | 10.870131   |
| 29246 | GO:0070882            | cellular cell wall organizat | 0.16 | 2  | 0.4366812  | 53   | 0.15305975  |
| 2778  | GO:0003954            | NADH dehydrogenase ac        | 0.16 | 2  | 0.4366812  | 53   | 0.15305975  |
| 22375 | GO:0046872            | metal ion binding            | 0.16 | 46 | 10.043668  | 2985 | 8.6204405   |
| 6436  | GO:0009067            | aspartate family amino ac    | 0.16 | 1  | 0.2183406  | 13   | 0.037542958 |
| 8578  | GO:0015165            | pyrimidine nucleotide sug    | 0.16 | 1  | 0.2183406  | 13   | 0.037542958 |
| 9050  | GO:0015781            | pyrimidine nucleotide-sug    | 0.16 | 1  | 0.2183406  | 13   | 0.037542958 |
| 4649  | GO:0006520 GO:0006519 | cellular amino acid metab    | 0.16 | 6  | 1.3100437  | 277  | 0.7999538   |
| 19470 | GO:0043167            | ion binding                  | 0.16 | 46 | 10.043668  | 2997 | 8.655096    |
| 19472 | GO:0043169            | cation binding               | 0.16 | 46 | 10.043668  | 2997 | 8.655096    |
| 17617 | GO:0035251            | UDP-glucosyltransferase      | 0.16 | 5  | 1.091703   | 218  | 0.62956655  |
| 30066 | GO:0071702            | organic substance transp     | 0.17 | 10 | 2.183406   | 529  | 1.5277096   |
| 5767  | GO:0008237            | metalloproteinase activity   | 0.17 | 2  | 0.4366812  | 56   | 0.16172351  |
| 22409 | GO:0048906            | tetrapyrrole binding         | 0.17 | 11 | 2.4017467  | 596  | 1.7212002   |
| 4670  | GO:0006541            | glutamine metabolic proces   | 0.17 | 1  | 0.2183406  | 14   | 0.040430877 |
| 9399  | GO:0016174            | NAD(P)H oxidase activity     | 0.17 | 1  | 0.2183406  | 14   | 0.040430877 |
| 9873  | GO:0016833            | oxo-acid-lyase activity      | 0.17 | 1  | 0.2183406  | 14   | 0.040430877 |
| 24970 | GO:0050664            | oxidoreductase activity, a   | 0.17 | 1  | 0.2183406  | 14   | 0.040430877 |
| 31408 | GO:0080031            | methyl salicylate esterase   | 0.17 | 1  | 0.2183406  | 14   | 0.040430877 |
| 270   | GO:0000339            | RNA cap binding              | 0.17 | 1  | 0.2183406  | 14   | 0.040430877 |
| 2998  | GO:0004311            | farnesyltransferase a        | 0.17 | 1  | 0.2183406  | 14   | 0.040430877 |
| 3204  | GO:0004568 GO:0004562 | alpha-glucosidase activity   | 0.17 | 1  | 0.2183406  | 14   | 0.040430877 |
| 6441  | GO:0009072            | aromatic amino acid famil    | 0.17 | 2  | 0.4366812  | 57   | 0.16461143  |
| 9813  | GO:0016759            | cellulose synthase activit   | 0.17 | 2  | 0.4366812  | 57   | 0.16461143  |
| 23973 | GO:0048583            | regulation of response to    | 0.17 | 2  | 0.4366812  | 57   | 0.16461143  |
| 29919 | GO:0071555            | cell wall organization       | 0.18 | 2  | 0.4366812  | 58   | 0.16749935  |
| 7520  | GO:0010294            | abscisic acid glucosyltran   | 0.18 | 1  | 0.2183406  | 15   | 0.043318797 |
| 8635  | GO:0015229            | L-ascorbic acid transporte   | 0.18 | 1  | 0.2183406  | 15   | 0.043318797 |
| 9144  | GO:0015882            | L-ascorbic acid transport    | 0.18 | 1  | 0.2183406  | 15   | 0.043318797 |
| 2868  | GO:0004062            | aryl sulfotransferase activ  | 0.18 | 1  | 0.2183406  | 15   | 0.043318797 |
| 3209  | GO:0004564            | beta-fructofuranosidase a    | 0.18 | 1  | 0.2183406  | 15   | 0.043318797 |
| 3476  | GO:0004872 GO:0019044 | receptor activity            | 0.18 | 12 | 2.6200874  | 672  | 1.9406822   |
| 2831  | GO:0004022            | alcohol dehydrogenase (N     | 0.18 | 2  | 0.4366812  | 59   | 0.17038727  |
| 9730  | GO:0016651            | oxidoreductase activity, a   | 0.19 | 3  | 0.65502185 | 112  | 0.32344702  |
| 29918 | GO:0071554            | cell wall organization or bi | 0.19 | 3  | 0.65502185 | 112  | 0.32344702  |
| 6077  | GO:0008652            | cellular amino acid biosyn   | 0.19 | 4  | 0.8733624  | 169  | 0.48805845  |
| 9427  | GO:0016215            | CoA desaturase activity      | 0.19 | 1  | 0.2183406  | 16   | 0.046206716 |
| 18757 | GO:0042409            | caffeoyl-CoA O-methyltra     | 0.19 | 1  | 0.2183406  | 16   | 0.046206716 |
| 219   | GO:0000287            | magnesium ion binding        | 0.19 | 1  | 0.2183406  | 16   | 0.046206716 |
| 3334  | GO:0004713 GO:0004719 | protein tyrosine kinase ac   | 0.19 | 1  | 0.2183406  | 16   | 0.046206716 |
| 3382  | GO:0004768 GO:0016214 | stearoyl-CoA 9-desaturas     | 0.19 | 1  | 0.2183406  | 16   | 0.046206716 |
| 8526  | GO:0015112            | nitrate transmembrane tra    | 0.19 | 2  | 0.4366812  | 61   | 0.1761631   |
| 8975  | GO:0015706 GO:0006872 | nitrate transport            | 0.19 | 2  | 0.4366812  | 61   | 0.1761631   |
| 13753 | GO:0031323            | regulation of cellular meta  | 0.20 | 42 | 9.170305   | 2770 | 7.999538    |
| 5213  | GO:0007186            | G-protein coupled recept     | 0.20 | 2  | 0.4366812  | 62   | 0.17905103  |
| 9768  | GO:0016706            | oxidoreductase activity, a   | 0.20 | 4  | 0.8733624  | 175  | 0.505386    |
| 30887 | GO:0072531            | pyrimidine-containing con    | 0.20 | 1  | 0.2183406  | 17   | 0.049094636 |
| 31465 | GO:0080090            | regulation of primary meta   | 0.21 | 41 | 8.951965   | 2710 | 7.826263    |
| 16595 | GO:0034212            | peptide N-acetyltransfer     | 0.21 | 1  | 0.2183406  | 18   | 0.051982556 |
| 3239  | GO:0004596            | peptide alpha-N-acetyltra    | 0.21 | 1  | 0.2183406  | 18   | 0.051982556 |
| 20356 | GO:0044106            | cellular amine metabolic p   | 0.21 | 6  | 1.3100437  | 303  | 0.8750397   |
| 9890  | GO:0016854            | racemase and epimerase       | 0.22 | 2  | 0.4366812  | 66   | 0.1906027   |
| 6663  | GO:0009309            | amine biosynthetic proces    | 0.22 | 4  | 0.8733624  | 181  | 0.5227135   |
| 6884  | GO:0009607            | response to biotic stimulu   | 0.22 | 3  | 0.65502185 | 122  | 0.3523262   |
| 3799  | GO:0005338 GO:0005339 | nucleotide-sugar transme     | 0.22 | 1  | 0.2183406  | 19   | 0.054870475 |
| 5230  | GO:0007205            | activation of protein kinas  | 0.22 | 1  | 0.2183406  | 19   | 0.054870475 |
| 6435  | GO:0009066            | aspartate family amino ac    | 0.22 | 1  | 0.2183406  | 19   | 0.054870475 |
| 9049  | GO:0015780            | nucleotide-sugar transpor    | 0.22 | 1  | 0.2183406  | 19   | 0.054870475 |
| 14556 | GO:0032147            | activation of protein kinas  | 0.22 | 1  | 0.2183406  | 19   | 0.054870475 |
| 5981  | GO:0008509            | anion transmembrane traf     | 0.23 | 5  | 1.091703   | 245  | 0.70754033  |
| 11202 | GO:0019199            | transmembrane receptor t     | 0.23 | 9  | 1.9650655  | 504  | 1.4555116   |
| 2999  | GO:0004312            | fatty acid synthase activit  | 0.23 | 2  | 0.4366812  | 68   | 0.19637854  |
| 4917  | GO:0006820 GO:0006822 | anion transport              | 0.23 | 5  | 1.091703   | 247  | 0.7133162   |
| 11221 | GO:0019219            | regulation of nucleobase     | 0.23 | 40 | 8.733624   | 2675 | 7.7251854   |
| 25468 | GO:0051171            | regulation of nitrogen con   | 0.23 | 40 | 8.733624   | 2675 | 7.7251854   |
| 31420 | GO:0080043            | quercetin 3-O-glucosyltra    | 0.23 | 2  | 0.4366812  | 69   | 0.19926646  |
| 3200  | GO:0004553 GO:0016800 | hydrolase activity, hydroly  | 0.23 | 6  | 1.3100437  | 312  | 0.90103096  |
| 25477 | GO:0051180            | vitamin transport            | 0.23 | 1  | 0.2183406  | 20   | 0.0577584   |
| 25480 | GO:0051183            | vitamin transporter activit  | 0.23 | 1  | 0.2183406  | 20   | 0.0577584   |
| 2675  | GO:0003825            | alpha,alpha-trehalose-phc    | 0.23 | 1  | 0.2183406  | 20   | 0.0577584   |
| 3328  | GO:0004707 GO:0008338 | MAP kinase activity          | 0.23 | 1  | 0.2183406  | 20   | 0.0577584   |
| 9583  | GO:0016469            | proton-transporting two-se   | 0.24 | 3  | 0.65502185 | 127  | 0.36676583  |
| 15524 | GO:0033124            | regulation of GTP catabol    | 0.24 | 2  | 0.4366812  | 70   | 0.20215438  |
| 19394 | GO:0043087            | regulation of GTPase acti    | 0.24 | 2  | 0.4366812  | 70   | 0.20215438  |
| 6662  | GO:0009308            | amine metabolic process      | 0.24 | 6  | 1.3100437  | 314  | 0.9068068   |
| 25098 | GO:0050794 GO:0051244 | regulation of cellular proc  | 0.24 | 58 | 12.663755  | 3987 | 11.514136   |
| 5878  | GO:0008378            | galactosyltransferase acti   | 0.24 | 1  | 0.2183406  | 21   | 0.060646318 |
| 9902  | GO:0016868 GO:0016777 | intramolecular transferase   | 0.24 | 1  | 0.2183406  | 21   | 0.060646318 |
| 12999 | GO:0030506            | ankyrin binding              | 0.24 | 1  | 0.2183406  | 21   | 0.060646318 |
| 23518 | GO:0048040            | UDP-glucuronate decarbox     | 0.24 | 1  | 0.2183406  | 21   | 0.060646318 |
| 27063 | GO:0060089            | molecular transducer activ   | 0.25 | 13 | 2.838428   | 787  | 2.2727928   |
| 3475  | GO:0004871 GO:0005062 | signal transducer activity   | 0.25 | 13 | 2.838428   | 787  | 2.2727928   |
| 24968 | GO:0050662            | coenzyme binding             | 0.25 | 4  | 0.8733624  | 191  | 0.5515927   |
| 2975  | GO:0004175 GO:0016809 | endopeptidase activity       | 0.25 | 6  | 1.3100437  | 320  | 0.9241344   |
| 4247  | GO:0006007            | glucose catabolic process    | 0.25 | 2  | 0.4366812  | 73   | 0.21081814  |
| 9703  | GO:0016620            | oxidoreductase activity, a   | 0.25 | 2  | 0.4366812  | 73   | 0.21081814  |
| 11313 | GO:0019320            | hexose catabolic process     | 0.25 | 2  | 0.4366812  | 73   | 0.21081814  |
| 20525 | GO:0044275            | cellular carbohydrate cata   | 0.25 | 2  | 0.4366812  | 73   | 0.21081814  |
| 21726 | GO:0046164            | alcohol catabolic process    | 0.25 | 2  | 0.4366812  | 73   | 0.21081814  |
| 21894 | GO:0046365            | monosaccharide catabolic     | 0.25 | 2  | 0.4366812  | 73   | 0.21081814  |
| 21152 | GO:0045551            | cinnamyl-alcohol dehydro     | 0.25 | 1  | 0.2183406  | 22   | 0.06353424  |
| 5732  | GO:0008194            | UDP-glucosyltransferase      | 0.26 | 6  | 1.3100437  | 322  | 0.9299102   |
| 8810  | GO:0015491            | cation:cation antiporter ac  | 0.26 | 2  | 0.4366812  | 75   | 0.21659398  |
| 9420  | GO:0016207            | 4-coumarate-CoA ligase a     | 0.26 | 1  | 0.2183406  | 23   | 0.06642216  |
| 16063 | GO:0033674            | positive regulation of kina  | 0.26 | 1  | 0.2183406  | 23   | 0.06642216  |
| 19815 | GO:0043549            | regulation of kinase activi  | 0.26 | 1  | 0.2183406  | 23   | 0.06642216  |
| 21437 | GO:0045859            | regulation of protein kinas  | 0.26 | 1  | 0.2183406  | 23   | 0.06642216  |
| 21438 | GO:0045860            | positive regulation of prot  | 0.26 | 1  | 0.2183406  | 23   | 0.06642216  |
| 22753 | GO:0047262 GO:0050375 | polygalacturonate 4-alpha    | 0.26 | 1  | 0.2183406  | 23   | 0.06642216  |
| 25628 | GO:0051338            | regulation of transferase a  | 0.26 | 1  | 0.2183406  | 23   | 0.06642216  |
| 25637 | GO:0051347            | positive regulation of tran  | 0.26 | 1  | 0.2183406  | 23   | 0.06642216  |
| 4526  | GO:0006351 GO:0006350 | transcription, DNA-depend    | 0.27 | 24 | 5.240175   | 1575 | 4.548474    |
| 15176 | GO:0032774            | RNA biosynthetic process     | 0.27 | 24 | 5.240175   | 1575 | 4.548474    |
| 6248  | GO:0008843            | endochitinase activity       | 0.27 | 1  | 0.2183406  | 24   | 0.06931008  |
| 13657 | GO:0031225            | anchored to membrane         | 0.27 | 1  | 0.2183406  | 24   | 0.06931008  |
| 13659 | GO:0031227            | intrinsic to endoplasmic re  | 0.27 | 1  | 0.2183406  | 24   | 0.06931008  |
| 31407 | GO:0080030            | methyl indole-3-acetate es   | 0.27 | 1  | 0.2183406  | 24   | 0.06931008  |
| 3213  | GO:0004568            | chitinase activity           | 0.27 | 1  | 0.2183406  | 24   | 0.06931008  |
| 27228 | GO:0060255            | regulation of macromolec     | 0.27 | 39 | 8.515284   | 2660 | 7.6818666   |

|       |            |                                                           |                                                     |      |            |            |             |             |
|-------|------------|-----------------------------------------------------------|-----------------------------------------------------|------|------------|------------|-------------|-------------|
| 15436 | GO:0033036 | macromolecule localization                                | 0.27                                                | 7    | 1.5283843  | 397        | 1.1465042   |             |
| 19126 | GO:0042803 | protein homodimerization                                  | 0.27                                                | 5    | 1.091703   | 265        | 0.7652988   |             |
| 5196  | GO:0007166 | cell surface receptor linkage                             | 0.28                                                | 2    | 0.4366812  | 78         | 0.22525774  |             |
| 19832 | GO:0043566 | structure-specific DNA binding                            | 0.28                                                | 2    | 0.4366812  | 78         | 0.22525774  |             |
| 30865 | GO:0072509 | divalent inorganic cation transport                       | 0.28                                                | 2    | 0.4366812  | 78         | 0.22525774  |             |
| 4530  | GO:0006355 | GO:0032583                                                | regulation of transcription                         | 0.28 | 38         | 8.296944   | 2591        | 7.4826      |
| 9699  | GO:0016616 | oxidoreductase activity, acting on NADPH                  | 0.28                                                | 5    | 1.091703   | 266        | 0.7681867   |             |
| 25544 | GO:0051252 | regulation of RNA metabolism                              | 0.28                                                | 38   | 8.296944   | 2593       | 7.488376    |             |
| 13822 | GO:0031399 | regulation of protein modification                        | 0.28                                                | 1    | 0.2183406  | 25         | 0.072197996 |             |
| 21145 | GO:0045543 | gibberellin 2-beta-dioxigenin biosynthesis                | 0.28                                                | 1    | 0.2183406  | 25         | 0.072197996 |             |
| 1225  | GO:0001932 | regulation of protein phosphorylation                     | 0.28                                                | 1    | 0.2183406  | 25         | 0.072197996 |             |
| 4358  | GO:0006140 | regulation of nucleotide catabolism                       | 0.29                                                | 2    | 0.4366812  | 80         | 0.2310336   |             |
| 7146  | GO:0009894 | regulation of catabolic process                           | 0.29                                                | 2    | 0.4366812  | 80         | 0.2310336   |             |
| 9682  | GO:0016597 | amino acid binding                                        | 0.29                                                | 2    | 0.4366812  | 80         | 0.2310336   |             |
| 13278 | GO:0030811 | regulation of nucleotide catabolism                       | 0.29                                                | 2    | 0.4366812  | 80         | 0.2310336   |             |
| 13759 | GO:0031329 | regulation of cellular catalytic activity                 | 0.29                                                | 2    | 0.4366812  | 80         | 0.2310336   |             |
| 15521 | GO:0033121 | regulation of purine nucleotide catabolism                | 0.29                                                | 2    | 0.4366812  | 80         | 0.2310336   |             |
| 19479 | GO:0043176 | amine binding                                             | 0.29                                                | 2    | 0.4366812  | 80         | 0.2310336   |             |
| 7141  | GO:0009889 | regulation of biosynthetic process                        | 0.29                                                | 38   | 8.296944   | 2605       | 7.523031    |             |
| 7772  | GO:0010556 | regulation of macromolecule biosynthesis                  | 0.29                                                | 38   | 8.296944   | 2605       | 7.523031    |             |
| 13756 | GO:0031326 | regulation of cellular biosynthesis                       | 0.29                                                | 38   | 8.296944   | 2605       | 7.523031    |             |
| 32213 | GO:2000112 | regulation of cellular macromolecule biosynthesis         | 0.29                                                | 38   | 8.296944   | 2605       | 7.523031    |             |
| 18674 | GO:0042325 | regulation of phosphorylation                             | 0.29                                                | 2    | 0.4366812  | 81         | 0.23392151  |             |
| 4030  | GO:0005741 | mitochondrial outer membrane                              | 0.29                                                | 1    | 0.2183406  | 26         | 0.075085916 |             |
| 9884  | GO:0016847 | GO:0034100                                                | 1-aminocyclopropane-1-carboxylate biosynthesis      | 0.29 | 1          | 0.2183406  | 26          | 0.075085916 |
| 10911 | GO:0018871 | 1-aminocyclopropane-1-carboxylate biosynthesis            | 0.29                                                | 1    | 0.2183406  | 26         | 0.075085916 |             |
| 18579 | GO:0042218 | 1-aminocyclopropane-1-carboxylate biosynthesis            | 0.29                                                | 1    | 0.2183406  | 26         | 0.075085916 |             |
| 30689 | GO:0072330 | monocarboxylic acid biosynthesis                          | 0.29                                                | 1    | 0.2183406  | 26         | 0.075085916 |             |
| 5195  | GO:0007165 | GO:0023033                                                | signal transduction                                 | 0.29 | 15         | 3.275109   | 961         | 2.775291    |
| 12602 | GO:0023052 | GO:0023046                                                | signaling                                           | 0.29 | 15         | 3.275109   | 961         | 2.775291    |
| 29202 | GO:0070838 | divalent metal ion transport                              | 0.30                                                | 2    | 0.4366812  | 82         | 0.23680943  |             |
| 6433  | GO:0009064 | glutamine family amino acid transport                     | 0.30                                                | 1    | 0.2183406  | 27         | 0.077973835 |             |
| 3873  | GO:0005507 | copper ion binding                                        | 0.30                                                | 3    | 0.65502185 | 146        | 0.42163628  |             |
| 4327  | GO:0006091 | generation of precursor metabolites and energy            | 0.31                                                | 2    | 0.4366812  | 84         | 0.24258527  |             |
| 30867 | GO:0072511 | divalent inorganic cation transport                       | 0.31                                                | 2    | 0.4366812  | 84         | 0.24258527  |             |
| 11222 | GO:0019220 | regulation of phosphate transport                         | 0.31                                                | 2    | 0.4366812  | 85         | 0.24547319  |             |
| 25471 | GO:0051174 | regulation of phosphorus transport                        | 0.31                                                | 2    | 0.4366812  | 85         | 0.24547319  |             |
| 13634 | GO:0031177 | phosphopantetheine binding                                | 0.31                                                | 1    | 0.2183406  | 28         | 0.080861755 |             |
| 139   | GO:0000175 | 3'-5'-exoribonuclease activity                            | 0.31                                                | 1    | 0.2183406  | 28         | 0.080861755 |             |
| 3284  | GO:0004650 | polygalacturonase activity                                | 0.31                                                | 1    | 0.2183406  | 28         | 0.080861755 |             |
| 20533 | GO:0044283 | small molecule biosynthesis                               | 0.31                                                | 6    | 1.3100437  | 347        | 1.0021082   |             |
| 7692  | GO:0010468 | regulation of gene expression                             | 0.31                                                | 38   | 8.296944   | 2635       | 7.6096687   |             |
| 11426 | GO:0019438 | aromatic compound biosynthesis                            | 0.32                                                | 3    | 0.65502185 | 149        | 0.43030006  |             |
| 4029  | GO:0005740 | mitochondrial envelope                                    | 0.32                                                | 3    | 0.65502185 | 151        | 0.4360759   |             |
| 8679  | GO:0015297 | antiporter activity                                       | 0.33                                                | 3    | 0.65502185 | 152        | 0.4389638   |             |
| 8682  | GO:0015300 | solute:solute antiporter activity                         | 0.33                                                | 3    | 0.65502185 | 152        | 0.4389638   |             |
| 8683  | GO:0015301 | GO:0015380                                                | anion:anion antiporter activity                     | 0.33 | 1          | 0.2183406  | 30          | 0.086637594 |
| 2774  | GO:0003950 | NAD+ ADP-ribosyltransferase activity                      | 0.33                                                | 1    | 0.2183406  | 30         | 0.086637594 |             |
| 3518  | GO:0004930 | GO:0001622                                                | G-protein coupled receptor activity                 | 0.33 | 1          | 0.2183406  | 30          | 0.086637594 |
| 6424  | GO:0009055 | GO:0009053                                                | electron carrier activity                           | 0.33 | 3          | 0.65502185 | 154         | 0.44473964  |
| 8517  | GO:0015103 | inorganic anion transport                                 | 0.33                                                | 3    | 0.65502185 | 154        | 0.44473964  |             |
| 9294  | GO:0016052 | GO:0006095                                                | carbohydrate catabolic process                      | 0.34 | 2          | 0.4366812  | 91          | 0.2628007   |
| 9697  | GO:0016614 | oxidoreductase activity, acting on NADPH                  | 0.35                                                | 5    | 1.091703   | 293        | 0.84616053  |             |
| 3785  | GO:0005315 | GO:0005311                                                | inorganic phosphate transport                       | 0.35 | 1          | 0.2183406  | 32          | 0.09241343  |
| 4757  | GO:0006633 | GO:0000037                                                | fatty acid biosynthetic process                     | 0.35 | 1          | 0.2183406  | 32          | 0.09241343  |
| 9927  | GO:0016896 | exoribonuclease activity, acting on RNA                   | 0.35                                                | 1    | 0.2183406  | 32         | 0.09241343  |             |
| 14381 | GO:0031968 | organelle outer membrane                                  | 0.35                                                | 1    | 0.2183406  | 32         | 0.09241343  |             |
| 21041 | GO:0045431 | flavonol synthase activity                                | 0.35                                                | 1    | 0.2183406  | 32         | 0.09241343  |             |
| 25836 | GO:0051552 | flavone metabolic process                                 | 0.35                                                | 1    | 0.2183406  | 32         | 0.09241343  |             |
| 25837 | GO:0051553 | flavone biosynthetic process                              | 0.35                                                | 1    | 0.2183406  | 32         | 0.09241343  |             |
| 25838 | GO:0051554 | flavonol metabolic process                                | 0.35                                                | 1    | 0.2183406  | 32         | 0.09241343  |             |
| 25839 | GO:0051555 | flavonol biosynthetic process                             | 0.35                                                | 1    | 0.2183406  | 32         | 0.09241343  |             |
| 3190  | GO:0004532 | exoribonuclease activity                                  | 0.35                                                | 1    | 0.2183406  | 32         | 0.09241343  |             |
| 3265  | GO:0004630 | phospholipase D activity                                  | 0.35                                                | 1    | 0.2183406  | 32         | 0.09241343  |             |
| 20885 | GO:0045261 | proton-transporting ATP synthase activity                 | 0.36                                                | 1    | 0.2183406  | 33         | 0.09530135  |             |
| 5827  | GO:0008308 | GO:0022844                                                | voltage-gated anion channel activity                | 0.36 | 1          | 0.2183406  | 34          | 0.09818927  |
| 20321 | GO:0044070 | regulation of anion transport                             | 0.36                                                | 1    | 0.2183406  | 34         | 0.09818927  |             |
| 13829 | GO:0031406 | carboxylic acid binding                                   | 0.37                                                | 2    | 0.4366812  | 98         | 0.28301615  |             |
| 18912 | GO:0042578 | phosphoric ester hydrolase activity                       | 0.37                                                | 7    | 1.5283843  | 444        | 1.2822365   |             |
| 20623 | GO:0044429 | mitochondrial part                                        | 0.37                                                | 3    | 0.65502185 | 165        | 0.47650677  |             |
| 3877  | GO:0005516 | calmodulin binding                                        | 0.38                                                | 4    | 0.8733624  | 236        | 0.6815491   |             |
| 5902  | GO:0008408 | 3'-5' exonuclease activity                                | 0.38                                                | 1    | 0.2183406  | 36         | 0.10396511  |             |
| 9915  | GO:0016884 | GO:0016003                                                | carbon-nitrogen ligase activity                     | 0.39 | 1          | 0.2183406  | 37          | 0.10685303  |
| 9839  | GO:0016791 | GO:0016302                                                | phosphatase activity                                | 0.40 | 6          | 1.3100437  | 383         | 1.1060733   |
| 9637  | GO:0016538 | GO:0003755                                                | cyclin-dependent protein kinase activity            | 0.40 | 1          | 0.2183406  | 38          | 0.10974095  |
| 4067  | GO:0005783 | endoplasmic reticulum                                     | 0.41                                                | 3    | 0.65502185 | 174        | 0.50249803  |             |
| 13656 | GO:0031224 | intrinsic to membrane                                     | 0.41                                                | 17   | 3.7117903  | 1193       | 3.4452884   |             |
| 8967  | GO:0015698 | inorganic anion transport                                 | 0.41                                                | 3    | 0.65502185 | 176        | 0.5082739   |             |
| 5891  | GO:0008395 | GO:0008394                                                | steroid hydroxylase activity                        | 0.41 | 1          | 0.2183406  | 40          | 0.1155168   |
| 7072  | GO:0009813 | flavonoid biosynthetic process                            | 0.41                                                | 1    | 0.2183406  | 40         | 0.1155168   |             |
| 9843  | GO:0016796 | exonuclease activity, acting on RNA                       | 0.41                                                | 1    | 0.2183406  | 40         | 0.1155168   |             |
| 11804 | GO:0019867 | outer membrane                                            | 0.41                                                | 1    | 0.2183406  | 40         | 0.1155168   |             |
| 3942  | GO:0005618 | cell wall                                                 | 0.41                                                | 2    | 0.4366812  | 107        | 0.30900744  |             |
| 6166  | GO:0008757 | S-adenosylmethionine-dependent methyltransferase activity | 0.43                                                | 3    | 0.65502185 | 180        | 0.5198256   |             |
| 3753  | GO:0005253 | anion channel activity                                    | 0.43                                                | 1    | 0.2183406  | 42         | 0.121292636 |             |
| 4756  | GO:0006631 | fatty acid metabolic process                              | 0.43                                                | 1    | 0.2183406  | 42         | 0.121292636 |             |
| 4849  | GO:0006730 | GO:0019753                                                | one-carbon metabolic process                        | 0.43 | 5          | 1.091703   | 325         | 0.93857396  |
| 12868 | GO:0030312 | external encapsulating structure                          | 0.43                                                | 2    | 0.4366812  | 111        | 0.3205591   |             |
| 14676 | GO:0032268 | regulation of cellular protein biosynthesis               | 0.44                                                | 1    | 0.2183406  | 43         | 0.124180555 |             |
| 25538 | GO:0051246 | regulation of protein metabolism                          | 0.44                                                | 1    | 0.2183406  | 43         | 0.124180555 |             |
| 8680  | GO:0015298 | solute:cation antiporter activity                         | 0.44                                                | 2    | 0.4366812  | 112        | 0.32344702  |             |
| 9933  | GO:0016903 | oxidoreductase activity, acting on NADPH                  | 0.44                                                | 2    | 0.4366812  | 113        | 0.32633495  |             |
| 7071  | GO:0009812 | flavonoid metabolic process                               | 0.44                                                | 1    | 0.2183406  | 44         | 0.12706847  |             |
| 9186  | GO:0015926 | glucosidase activity                                      | 0.44                                                | 1    | 0.2183406  | 44         | 0.12706847  |             |
| 13730 | GO:0031300 | intrinsic to organelle membrane                           | 0.44                                                | 1    | 0.2183406  | 44         | 0.12706847  |             |
| 4844  | GO:0006725 | cellular aromatic compound biosynthesis                   | 0.44                                                | 3    | 0.65502185 | 185        | 0.53426516  |             |
| 9818  | GO:0016765 | GO:0016766                                                | transferase activity, transferring phosphate groups | 0.44 | 3          | 0.65502185 | 185         | 0.53426516  |
| 20499 | GO:0044249 | cellular biosynthetic process                             | 0.44                                                | 36   | 7.860262   | 2635       | 7.6096687   |             |
| 22478 | GO:0046982 | protein heterodimerization                                | 0.45                                                | 2    | 0.4366812  | 114        | 0.32922286  |             |
| 20619 | GO:0044425 | membrane part                                             | 0.45                                                | 21   | 4.5851526  | 1523       | 4.398302    |             |
| 6427  | GO:0009058 | biosynthetic process                                      | 0.46                                                | 38   | 8.296944   | 2796       | 8.074624    |             |
| 4073  | GO:0005789 | endoplasmic reticulum membrane                            | 0.46                                                | 1    | 0.2183406  | 46         | 0.13284431  |             |
| 18536 | GO:0042175 | nuclear outer membrane                                    | 0.46                                                | 1    | 0.2183406  | 46         | 0.13284431  |             |
| 20626 | GO:0044432 | endoplasmic reticulum part                                | 0.46                                                | 1    | 0.2183406  | 46         | 0.13284431  |             |
| 5807  | GO:0008287 | protein serine/threonine phosphorylation                  | 0.47                                                | 1    | 0.2183406  | 47         | 0.13573223  |             |
| 11830 | GO:0019901 | protein kinase binding                                    | 0.48                                                | 1    | 0.2183406  | 49         | 0.14150807  |             |
| 31421 | GO:0080044 | quercetin 7-O-glucosyltransferase activity                | 0.48                                                | 1    | 0.2183406  | 49         | 0.14150807  |             |
| 3260  | GO:0004620 | phospholipase activity                                    | 0.49                                                | 2    | 0.4366812  | 123        | 0.35521415  |             |
| 3185  | GO:0004527 | GO:0008857                                                | exonuclease activity                                | 0.49 | 1          | 0.2183406  | 50          | 0.14439599  |
| 3340  | GO:0004721 | phosphoprotein phosphatase activity                       | 0.49                                                | 3    | 0.65502185 | 199        | 0.57469606  |             |
| 9494  | GO:0016311 | dephosphorylation                                         | 0.49                                                | 6    | 1.3100437  | 425        | 1.227366    |             |
| 9267  | GO:0016021 | integral to membrane                                      | 0.49                                                | 15   | 3.275109   | 1103       | 3.1853757   |             |
| 9975  | GO:0016998 | cell wall macromolecule catabolism                        | 0.49                                                | 1    | 0.2183406  | 51         | 0.14728391  |             |



|       |                       |                              |      |     |            |      |            |
|-------|-----------------------|------------------------------|------|-----|------------|------|------------|
| 3099  | GO:0004428            | inositol or phosphatidyl     | 0.49 | 1   | 0.2183406  | 51   | 0.14728391 |
| 14380 | GO:0031967            | organelle envelope           | 0.50 | 3   | 0.65502185 | 201  | 0.5804719  |
| 4915  | GO:0006817            | phosphate transport          | 0.50 | 1   | 0.2183406  | 52   | 0.15017183 |
| 6965  | GO:0009699            | phenylpropanoid biosynth     | 0.50 | 1   | 0.2183406  | 52   | 0.15017183 |
| 8528  | GO:0015114            | phosphate transmembran       | 0.50 | 1   | 0.2183406  | 52   | 0.15017183 |
| 17801 | GO:0035435            | phosphate transmembran       | 0.50 | 1   | 0.2183406  | 52   | 0.15017183 |
| 20287 | GO:0044036            | cell wall macromolecule m    | 0.50 | 1   | 0.2183406  | 52   | 0.15017183 |
| 14387 | GO:0031975            | envelope                     | 0.51 | 3   | 0.65502185 | 205  | 0.59202355 |
| 4894  | GO:0006790            | sulfur compound metabol      | 0.52 | 1   | 0.2183406  | 55   | 0.15883559 |
| 9533  | GO:0016405            | CoA-ligase activity          | 0.52 | 1   | 0.2183406  | 55   | 0.15883559 |
| 4755  | GO:0006629            | lipid metabolic process      | 0.52 | 8   | 1.7467248  | 590  | 1.7038727  |
| 15577 | GO:0033178            | proton-transporting two-se   | 0.53 | 1   | 0.2183406  | 56   | 0.16172351 |
| 22479 | GO:0046983            | protein dimerization activi  | 0.53 | 7   | 1.5283843  | 517  | 1.4930545  |
| 5715  | GO:0008171            | O-methyltransferase activ    | 0.53 | 1   | 0.2183406  | 57   | 0.16461143 |
| 9910  | GO:0016878            | acid-thiol ligase activity   | 0.53 | 1   | 0.2183406  | 57   | 0.16461143 |
| 9906  | GO:0016874            | ligase activity              | 0.53 | 8   | 1.7467248  | 597  | 1.7240882  |
| 9754  | GO:0016684            | oxidoreductase activity, a   | 0.53 | 2   | 0.4366812  | 135  | 0.38986918 |
| 3242  | GO:0004601 GO:0016688 | peroxidase activity          | 0.53 | 2   | 0.4366812  | 135  | 0.38986918 |
| 4913  | GO:0006814 GO:0006834 | sodium ion transport         | 0.54 | 1   | 0.2183406  | 58   | 0.16749935 |
| 5819  | GO:0008299 GO:0009244 | isoprenoid biosynthetic pr   | 0.54 | 1   | 0.2183406  | 58   | 0.16749935 |
| 8499  | GO:0015081 GO:0022816 | sodium ion transmembran      | 0.54 | 1   | 0.2183406  | 58   | 0.16749935 |
| 11820 | GO:0019887            | protein kinase regulator a   | 0.54 | 1   | 0.2183406  | 58   | 0.16749935 |
| 18086 | GO:0035725            | sodium ion transmembran      | 0.54 | 1   | 0.2183406  | 58   | 0.16749935 |
| 29800 | GO:0071436            | sodium ion export            | 0.54 | 1   | 0.2183406  | 58   | 0.16749935 |
| 3323  | GO:0004702            | receptor signaling protein   | 0.54 | 1   | 0.2183406  | 58   | 0.16749935 |
| 25998 | GO:0051716            | cellular response to stimu   | 0.54 | 15  | 3.275109   | 1138 | 3.2864528  |
| 9900  | GO:0016866            | intramolecular transferase   | 0.54 | 1   | 0.2183406  | 59   | 0.17038727 |
| 30700 | GO:0072341            | modified amino acid bindi    | 0.54 | 1   | 0.2183406  | 59   | 0.17038727 |
| 4840  | GO:0006720 GO:0016096 | isoprenoid metabolic proc    | 0.55 | 1   | 0.2183406  | 60   | 0.17327519 |
| 5652  | GO:0008081 GO:0004434 | phosphoric diester hydroly   | 0.55 | 1   | 0.2183406  | 60   | 0.17327519 |
| 6964  | GO:0009698            | phenylpropanoid metaboli     | 0.55 | 1   | 0.2183406  | 60   | 0.17327519 |
| 4028  | GO:0005739            | mitochondrion                | 0.56 | 3   | 0.65502185 | 219  | 0.63245445 |
| 6046  | GO:0008610            | lipid biosynthetic process   | 0.56 | 2   | 0.4366812  | 141  | 0.4071967  |
| 11210 | GO:0019207            | kinase regulator activity    | 0.56 | 1   | 0.2183406  | 62   | 0.17905103 |
| 20883 | GO:0045259 GO:0045259 | proton-transporting ATP s    | 0.56 | 1   | 0.2183406  | 62   | 0.17905103 |
| 8557  | GO:0015144            | carbohydrate transmembr      | 0.57 | 2   | 0.4366812  | 143  | 0.41297254 |
| 16602 | GO:0034219            | carbohydrate transmembr      | 0.57 | 2   | 0.4366812  | 143  | 0.41297254 |
| 9308  | GO:0016070            | RNA metabolic process        | 0.57 | 24  | 5.240175   | 1855 | 5.3570914  |
| 19125 | GO:0042802            | identical protein binding    | 0.58 | 9   | 1.9650655  | 697  | 2.01288    |
| 9889  | GO:0016853            | isomerase activity           | 0.58 | 4   | 0.8733624  | 306  | 0.8837035  |
| 9710  | GO:0016628            | oxidoreductase activity, a   | 0.58 | 1   | 0.2183406  | 67   | 0.18771479 |
| 6071  | GO:0008643 GO:0006866 | carbohydrate transport       | 0.58 | 2   | 0.4366812  | 145  | 0.42452422 |
| 5651  | GO:0008080            | N-acetyltransferase activi   | 0.59 | 1   | 0.2183406  | 67   | 0.19349062 |
| 21710 | GO:0046148            | pigment biosynthetic proc    | 0.60 | 1   | 0.2183406  | 69   | 0.19926646 |
| 3620  | GO:0005057            | receptor signaling protein   | 0.60 | 1   | 0.2183406  | 69   | 0.19926646 |
| 5726  | GO:0008187            | poly-pyrimidine tract bindi  | 0.61 | 1   | 0.2183406  | 70   | 0.20215438 |
| 5788  | GO:0008266            | poly(U) RNA binding          | 0.61 | 1   | 0.2183406  | 70   | 0.20215438 |
| 11828 | GO:0019899            | enzyme binding               | 0.61 | 3   | 0.65502185 | 237  | 0.684437   |
| 3744  | GO:0005244            | voltage-gated ion channel    | 0.62 | 1   | 0.2183406  | 72   | 0.20793022 |
| 12528 | GO:0022832            | voltage-gated channel act    | 0.62 | 1   | 0.2183406  | 72   | 0.20793022 |
| 15280 | GO:0032879            | regulation of localization   | 0.62 | 1   | 0.2183406  | 72   | 0.20793022 |
| 17141 | GO:0034762            | regulation of transmembran   | 0.62 | 1   | 0.2183406  | 72   | 0.20793022 |
| 17144 | GO:0034765            | regulation of ion transmem   | 0.62 | 1   | 0.2183406  | 72   | 0.20793022 |
| 19568 | GO:0043269            | regulation of ion transport  | 0.62 | 1   | 0.2183406  | 72   | 0.20793022 |
| 25348 | GO:0051049            | regulation of transport      | 0.62 | 1   | 0.2183406  | 72   | 0.20793022 |
| 18786 | GO:0042440            | pigment metabolic proces     | 0.62 | 1   | 0.2183406  | 73   | 0.21081814 |
| 19831 | GO:0043565            | sequence-specific DNA bi     | 0.62 | 2   | 0.4366812  | 159  | 0.45917925 |
| 4641  | GO:0006508            | proteolysis                  | 0.63 | 12  | 2.6200874  | 965  | 2.7868426  |
| 8673  | GO:0015291 GO:0015290 | secondary active transmem    | 0.63 | 5   | 1.091703   | 407  | 1.1753833  |
| 9817  | GO:0016763            | transferase activity, transf | 0.63 | 1   | 0.2183406  | 74   | 0.21370606 |
| 5712  | GO:0008168 GO:0004480 | methyltransferase activity   | 0.63 | 3   | 0.65502185 | 244  | 0.7046524  |
| 9538  | GO:0016410            | N-acyltransferase activity   | 0.64 | 1   | 0.2183406  | 77   | 0.22236982 |
| 9422  | GO:0016209            | antioxidant activity         | 0.64 | 2   | 0.4366812  | 165  | 0.47650677 |
| 9800  | GO:0016746            | transferase activity, transf | 0.65 | 6   | 1.3100437  | 498  | 1.438184   |
| 3306  | GO:0004674 GO:0004695 | protein serine/threonine ki  | 0.65 | 13  | 2.838428   | 1062 | 3.0669708  |
| 9875  | GO:0016836            | hydro-lyase activity         | 0.66 | 1   | 0.2183406  | 80   | 0.2310336  |
| 3827  | GO:0005372            | water transmembrane tran     | 0.66 | 1   | 0.2183406  | 81   | 0.23392151 |
| 4927  | GO:0006833            | water transport              | 0.66 | 1   | 0.2183406  | 81   | 0.23392151 |
| 8652  | GO:0015250            | water channel activity       | 0.66 | 1   | 0.2183406  | 81   | 0.23392151 |
| 18429 | GO:0042044            | fluid transport              | 0.66 | 1   | 0.2183406  | 81   | 0.23392151 |
| 2658  | GO:0003729            | mRNA binding                 | 0.66 | 1   | 0.2183406  | 82   | 0.23680943 |
| 9796  | GO:0016741            | transferase activity, transf | 0.67 | 3   | 0.65502185 | 261  | 0.7537471  |
| 12692 | GO:0030117            | membrane coat                | 0.67 | 1   | 0.2183406  | 84   | 0.24258527 |
| 23870 | GO:0048475            | coated membrane              | 0.67 | 1   | 0.2183406  | 84   | 0.24258527 |
| 3304  | GO:0004672 GO:0050222 | protein kinase activity      | 0.69 | 16  | 3.4934497  | 1333 | 3.8495972  |
| 9824  | GO:0016773            | phosphotransferase activi    | 0.69 | 18  | 3.930131   | 1493 | 4.311664   |
| 7691  | GO:0010467            | gene expression              | 0.69 | 24  | 5.240175   | 1974 | 5.7007537  |
| 2982  | GO:0004197            | cysteine-type endopeptid     | 0.70 | 1   | 0.2183406  | 90   | 0.2599128  |
| 20505 | GO:0044255            | cellular lipid metabolic pro | 0.70 | 2   | 0.4366812  | 184  | 0.53137726 |
| 3644  | GO:0005102            | receptor binding             | 0.70 | 1   | 0.2183406  | 91   | 0.2628007  |
| 3808  | GO:0005351 GO:0005403 | sugar:hydrogen symporte      | 0.71 | 1   | 0.2183406  | 94   | 0.27146447 |
| 3835  | GO:0005402            | cation:sugar symporter ac    | 0.71 | 1   | 0.2183406  | 94   | 0.27146447 |
| 28378 | GO:0070011            | peptidase activity, acting o | 0.72 | 57  | 1.3100437  | 537  | 1.550813   |
| 17024 | GO:0034645 GO:0034961 | cellular macromolecule bi    | 0.72 | 24  | 5.240175   | 1999 | 5.7729516  |
| 20521 | GO:0044271            | cellular nitrogen compoun    | 0.72 | 4   | 0.8733624  | 367  | 1.0598665  |
| 3307  | GO:0004675            | transmembrane receptor f     | 0.72 | 4   | 0.8733624  | 367  | 1.0598665  |
| 11712 | GO:0019748            | secondary metabolic proc     | 0.72 | 1   | 0.2183406  | 95   | 0.27435237 |
| 6428  | GO:0009059 GO:0043284 | macromolecule biosynthe      | 0.72 | 24  | 5.240175   | 2003 | 5.7845035  |
| 14667 | GO:0032259            | methylation                  | 0.73 | 3   | 0.65502185 | 285  | 0.8230572  |
| 8677  | GO:0015295            | solute:hydrogen symporte     | 0.73 | 1   | 0.2183406  | 98   | 0.28301615 |
| 8681  | GO:0015299            | solute:hydrogen antiporte    | 0.73 | 1   | 0.2183406  | 98   | 0.28301615 |
| 12608 | GO:0030001            | metal ion transport          | 0.73 | 4   | 0.8733624  | 374  | 1.080082   |
| 2628  | GO:0003677            | DNA binding                  | 0.75 | 14  | 3.0567687  | 1224 | 3.534814   |
| 9709  | GO:0016627            | oxidoreductase activity, a   | 0.75 | 1   | 0.2183406  | 104  | 0.30034366 |
| 19392 | GO:0043085            | positive regulation of cata  | 0.75 | 1   | 0.2183406  | 104  | 0.30034366 |
| 20343 | GO:0044093            | positi regulation of mole    | 0.75 | 1   | 0.2183406  | 104  | 0.30034366 |
| 22415 | GO:0046914            | transition metal ion bindi   | 0.75 | 31  | 6.768559   | 2599 | 7.5057034  |
| 19253 | GO:0042936            | dipeptide transporter activ  | 0.75 | 1   | 0.2183406  | 105  | 0.3032316  |
| 19255 | GO:0042938            | dipeptide transport          | 0.75 | 1   | 0.2183406  | 105  | 0.3032316  |
| 3195  | GO:0004540            | ribonuclease activity        | 0.76 | 1   | 0.2183406  | 106  | 0.3061195  |
| 5763  | GO:0008233            | peptidase activity           | 0.76 | 6   | 1.3100437  | 565  | 1.6316746  |
| 9488  | GO:0016301            | kinase activity              | 0.77 | 20  | 4.366812   | 1740 | 5.0249805  |
| 22376 | GO:0046873            | metal ion transmembrane      | 0.77 | 2   | 0.4366812  | 213  | 0.6151269  |
| 8495  | GO:0015077            | monovalent inorganic cati    | 0.78 | 2   | 0.4366812  | 214  | 0.6180149  |
| 14379 | GO:0031966            | mitochondrial membrane       | 0.78 | 1   | 0.2183406  | 114  | 0.32922286 |
| 9535  | GO:0016407            | acetyltransferase activity   | 0.78 | 1   | 0.2183406  | 115  | 0.3321108  |
| 5019  | GO:0006952 GO:0002217 | defense response             | 0.79 | 2   | 0.4366812  | 221  | 0.63823026 |
| 12533 | GO:0022838            | substrate-specific channe    | 0.79 | 2   | 0.4366812  | 221  | 0.63823026 |
| 25416 | GO:0051119            | sugar transmembrane tran     | 0.79 | 1   | 0.2183406  | 118  | 0.34077454 |
| 20488 | GO:0044238            | primary metabolic process    | 0.79 | 114 | 24.89083   | 9167 | 26.47356   |
| 13547 | GO:0031090            | organelle membrane           | 0.80 | 2   | 0.4366812  | 224  | 0.64689404 |
| 8660  | GO:0015267 GO:0015249 | channel activity             | 0.80 | 2   | 0.4366812  | 226  | 0.6526699  |
| 12515 | GO:0022803            | passive transmembrane t      | 0.80 | 2   | 0.4366812  | 226  | 0.6526699  |

|       |                       |                              |      |     |            |       |            |
|-------|-----------------------|------------------------------|------|-----|------------|-------|------------|
| 12532 | GO:0022836            | gated channel activity       | 0.80 | 1   | 0.2183406  | 122   | 0.3523262  |
| 4990  | GO:0006915 GO:0008633 | apoptosis                    | 0.80 | 2   | 0.4366812  | 227   | 0.6555578  |
| 3449  | GO:0004842 GO:0004840 | ubiquitin-protein ligase ac  | 0.81 | 3   | 0.65502185 | 326   | 0.94146186 |
| 5909  | GO:0008415            | acyltransferase activity     | 0.81 | 3   | 0.65502185 | 330   | 0.95301354 |
| 9654  | GO:0016567            | protein ubiquitination       | 0.82 | 3   | 0.65502185 | 332   | 0.9587894  |
| 14854 | GO:0032446            | protein modification by sm   | 0.82 | 3   | 0.65502185 | 332   | 0.9587894  |
| 29011 | GO:0070647            | protein modification by sm   | 0.82 | 3   | 0.65502185 | 332   | 0.9587894  |
| 25195 | GO:0050896 GO:0051869 | response to stimulus         | 0.82 | 21  | 4.5851526  | 1881  | 5.432177   |
| 4910  | GO:0006811            | ion transport                | 0.82 | 10  | 2.183406   | 959   | 2.769515   |
| 5756  | GO:0008219            | cell death                   | 0.83 | 2   | 0.4366812  | 239   | 0.69021285 |
| 8209  | GO:0012501 GO:0016244 | programmed cell death        | 0.83 | 2   | 0.4366812  | 239   | 0.69021285 |
| 9462  | GO:0016265            | death                        | 0.83 | 2   | 0.4366812  | 239   | 0.69021285 |
| 11747 | GO:0019787 GO:0008633 | small conjugating protein    | 0.83 | 3   | 0.65502185 | 339   | 0.9790048  |
| 4394  | GO:0006184            | GTP catabolic process        | 0.83 | 1   | 0.2183406  | 132   | 0.3812054  |
| 21605 | GO:0046039            | GTP metabolic process        | 0.83 | 1   | 0.2183406  | 132   | 0.3812054  |
| 2758  | GO:0003924            | GTPase activity              | 0.83 | 1   | 0.2183406  | 132   | 0.3812054  |
| 8607  | GO:0015197 GO:0015633 | peptide transporter activit  | 0.84 | 1   | 0.2183406  | 139   | 0.40142086 |
| 8608  | GO:0015198            | oligopeptide transporter a   | 0.84 | 1   | 0.2183406  | 139   | 0.40142086 |
| 3724  | GO:0005216            | ion channel activity         | 0.85 | 1   | 0.2183406  | 140   | 0.40430877 |
| 3895  | GO:0005543            | phospholipid binding         | 0.85 | 1   | 0.2183406  | 140   | 0.40430877 |
| 4944  | GO:0006857            | oligopeptide transport       | 0.85 | 1   | 0.2183406  | 141   | 0.4071967  |
| 8676  | GO:0015294            | solute:cation symporter ac   | 0.85 | 1   | 0.2183406  | 141   | 0.4071967  |
| 9099  | GO:0015833            | peptide transport            | 0.85 | 1   | 0.2183406  | 141   | 0.4071967  |
| 4897  | GO:0006793            | phosphorus metabolic pro     | 0.85 | 33  | 7.2052402  | 2925  | 8.4471655  |
| 4900  | GO:0006796            | phosphate metabolic proc     | 0.85 | 33  | 7.2052402  | 2925  | 8.4471655  |
| 2986  | GO:0004252            | serine-type endopeptidase    | 0.85 | 1   | 0.2183406  | 144   | 0.41586044 |
| 9801  | GO:0016747            | transferase activity, transf | 0.86 | 4   | 0.8733624  | 456   | 1.3168914  |
| 9911  | GO:0016879            | ligase activity, forming ca  | 0.86 | 4   | 0.8733624  | 456   | 1.3168914  |
| 8494  | GO:0015075            | ion transmembrane transp     | 0.86 | 8   | 1.7467248  | 827   | 2.3883097  |
| 30306 | GO:0071944            | cell periphery               | 0.86 | 2   | 0.4366812  | 259   | 0.74797124 |
| 30204 | GO:0071840            | cellular component organi    | 0.86 | 3   | 0.65502185 | 362   | 1.045427   |
| 9285  | GO:0016043            | cellular component organi    | 0.86 | 2   | 0.4366812  | 261   | 0.7537471  |
| 16603 | GO:0034220            | ion transmembrane transp     | 0.86 | 8   | 1.7467248  | 833   | 2.4056373  |
| 4612  | GO:0006468            | protein phosphorylation      | 0.86 | 24  | 5.240175   | 2205  | 6.367863   |
| 19533 | GO:0043234            | protein complex              | 0.87 | 8   | 1.7467248  | 848   | 2.448956   |
| 9114  | GO:0015849            | organic acid transport       | 0.88 | 1   | 0.2183406  | 156   | 0.45051548 |
| 22443 | GO:0046942            | carboxylic acid transport    | 0.88 | 1   | 0.2183406  | 156   | 0.45051548 |
| 8496  | GO:0015078            | hydrogen ion transmembr      | 0.88 | 1   | 0.2183406  | 160   | 0.4620672  |
| 8943  | GO:0015672            | monovalent inorganic cati    | 0.88 | 3   | 0.65502185 | 383   | 1.1060733  |
| 5764  | GO:0008234 GO:0004220 | cysteine-type peptidase a    | 0.89 | 1   | 0.2183406  | 163   | 0.47073093 |
| 9493  | GO:0016310            | phosphorylation              | 0.89 | 27  | 5.8951964  | 2504  | 7.2313514  |
| 9913  | GO:0016881            | acid-amino acid ligase ac    | 0.89 | 3   | 0.65502185 | 391   | 1.1291766  |
| 30205 | GO:0071841            | cellular component organi    | 0.89 | 2   | 0.4366812  | 285   | 0.8230572  |
| 9823  | GO:0016772            | transferase activity, transf | 0.90 | 20  | 4.366812   | 1932  | 5.579461   |
| 3341  | GO:0004722 GO:0000158 | protein serine/threonine p   | 0.90 | 1   | 0.2183406  | 171   | 0.4938343  |
| 3156  | GO:0004497            | monooxygenase activity       | 0.90 | 1   | 0.2183406  | 172   | 0.49672222 |
| 4916  | GO:0006818            | hydrogen transport           | 0.90 | 2   | 0.4366812  | 292   | 0.84327257 |
| 9246  | GO:0015992            | proton transport             | 0.90 | 2   | 0.4366812  | 292   | 0.84327257 |
| 8675  | GO:0015293            | symporter activity           | 0.90 | 1   | 0.2183406  | 173   | 0.49961013 |
| 2657  | GO:0003727 GO:0003728 | single-stranded RNA bind     | 0.92 | 1   | 0.2183406  | 188   | 0.54292893 |
| 31895 | GO:0090304            | nucleic acid metabolic pro   | 0.92 | 24  | 5.240175   | 2340  | 6.5777324  |
| 30069 | GO:0071705            | nitrogen compound transp     | 0.93 | 1   | 0.2183406  | 202   | 0.5833598  |
| 12572 | GO:0022890 GO:0015082 | inorganic cation transmem    | 0.94 | 2   | 0.4366812  | 332   | 0.9587894  |
| 20487 | GO:0044237            | cellular metabolic process   | 0.94 | 95  | 20.742357  | 8185  | 23.637625  |
| 4911  | GO:0006812 GO:0006813 | cation transport             | 0.94 | 5   | 1.091703   | 662   | 1.9118029  |
| 21058 | GO:0045454 GO:0030503 | cell redox homeostasis       | 0.94 | 1   | 0.2183406  | 211   | 0.6093511  |
| 5766  | GO:0008236            | serine-type peptidase acti   | 0.94 | 1   | 0.2183406  | 214   | 0.6180149  |
| 5791  | GO:0008270            | zinc ion binding             | 0.94 | 18  | 3.930131   | 1880  | 5.4292893  |
| 10103 | GO:0017171            | serine hydrolase activity    | 0.95 | 1   | 0.2183406  | 220   | 0.63534236 |
| 13531 | GO:0031072            | heat shock protein binding   | 0.95 | 1   | 0.2183406  | 230   | 0.6642216  |
| 11695 | GO:0019725            | cellular homeostasis         | 0.96 | 1   | 0.2183406  | 234   | 0.67577326 |
| 18925 | GO:0042592            | homeostatic process          | 0.96 | 1   | 0.2183406  | 238   | 0.68732494 |
| 8211  | GO:0012505            | endomembrane system          | 0.96 | 1   | 0.2183406  | 242   | 0.6988766  |
| 4909  | GO:0006810 GO:0015457 | transport                    | 0.96 | 22  | 4.8034935  | 2315  | 6.6855345  |
| 25529 | GO:0051234            | establishment of localizat   | 0.96 | 22  | 4.8034935  | 2315  | 6.6855345  |
| 25476 | GO:0051179            | localization                 | 0.96 | 22  | 4.8034935  | 2319  | 6.697086   |
| 5661  | GO:0008092            | cytoskeletal protein bindi   | 0.96 | 1   | 0.2183406  | 249   | 0.719092   |
| 4609  | GO:0006464            | protein modification proce   | 0.97 | 27  | 5.8951964  | 2781  | 8.031305   |
| 12573 | GO:0022891            | substrate-specific transme   | 0.97 | 10  | 2.183406   | 1241  | 3.5839086  |
| 3955  | GO:0005634            | nucleus                      | 0.97 | 12  | 2.6200874  | 1433  | 4.138389   |
| 9266  | GO:0016020            | membrane                     | 0.97 | 38  | 8.296944   | 3741  | 10.803708  |
| 9579  | GO:0016462            | pyrophosphatase activity     | 0.97 | 7   | 1.5283843  | 954   | 2.7550755  |
| 3884  | GO:0005524            | ATP binding                  | 0.97 | 3   | 0.65502185 | 524   | 1.51327    |
| 9859  | GO:0016818            | hydrolase activity, acting   | 0.97 | 7   | 1.5283843  | 956   | 2.7608514  |
| 20532 | GO:0044282            | small molecule catabolic p   | 0.97 | 6   | 1.3100437  | 854   | 2.4662836  |
| 9858  | GO:0016817            | hydrolase activity, acting   | 0.97 | 7   | 1.5283843  | 959   | 2.769515   |
| 5840  | GO:0008324            | cation transmembrane tra     | 0.97 | 3   | 0.65502185 | 538   | 1.5537009  |
| 13041 | GO:0030554            | adenyl nucleotide binding    | 0.98 | 3   | 0.65502185 | 550   | 1.5883559  |
| 14965 | GO:0032559            | adenyl ribonucleotide bind   | 0.98 | 3   | 0.65502185 | 550   | 1.5883559  |
| 12516 | GO:0022804            | active transmembrane tra     | 0.98 | 5   | 1.091703   | 787   | 2.2727928  |
| 19684 | GO:0043412            | macromolecule modificati     | 0.98 | 27  | 5.8951964  | 2900  | 8.374968   |
| 20640 | GO:0044446            | intracellular organelle part | 0.99 | 4   | 0.8733624  | 710   | 2.0504231  |
| 26931 | GO:0055085            | transmembrane transport      | 0.99 | 12  | 2.6200874  | 1548  | 4.4705     |
| 28365 | GO:0065008            | regulation of biological qu  | 0.99 | 1   | 0.2183406  | 316   | 0.9125827  |
| 20616 | GO:0044422            | organelle part               | 0.99 | 4   | 0.8733624  | 712   | 2.0561988  |
| 6425  | GO:0009056            | catabolic process            | 0.99 | 7   | 1.5283843  | 1051  | 3.0352037  |
| 19526 | GO:0043227            | membrane-bounded organ       | 0.99 | 18  | 3.930131   | 2142  | 6.185924   |
| 19530 | GO:0043231            | intracellular membrane-bd    | 0.99 | 18  | 3.930131   | 2142  | 6.185924   |
| 5018  | GO:0006950            | response to stress           | 0.99 | 3   | 0.65502185 | 611   | 1.764519   |
| 12547 | GO:0022857 GO:0005388 | transmembrane transport      | 0.99 | 11  | 2.4017467  | 1483  | 4.282785   |
| 10058 | GO:0017111            | nucleoside-triphosphatase    | 0.99 | 5   | 1.091703   | 878   | 2.5355935  |
| 4408  | GO:0006200            | ATP catabolic process        | 0.99 | 3   | 0.65502185 | 641   | 1.8511566  |
| 9918  | GO:0016887 GO:0004002 | ATPase activity              | 0.99 | 3   | 0.65502185 | 641   | 1.8511566  |
| 21600 | GO:0046034            | ATP metabolic process        | 0.99 | 3   | 0.65502185 | 641   | 1.8511566  |
| 4405  | GO:0006195            | purine nucleotide cataboli   | 0.99 | 4   | 0.8733624  | 773   | 2.232362   |
| 6508  | GO:0009143            | nucleoside triphosphate c    | 0.99 | 4   | 0.8733624  | 773   | 2.232362   |
| 6509  | GO:0009144            | purine nucleoside triphos    | 0.99 | 4   | 0.8733624  | 773   | 2.232362   |
| 6511  | GO:0009146            | purine nucleoside triphos    | 0.99 | 4   | 0.8733624  | 773   | 2.232362   |
| 6519  | GO:0009154            | purine ribonucleotide cata   | 0.99 | 4   | 0.8733624  | 773   | 2.232362   |
| 6530  | GO:0009166            | nucleotide catabolic proce   | 0.99 | 4   | 0.8733624  | 773   | 2.232362   |
| 6567  | GO:0009203            | ribonucleoside triphospha    | 0.99 | 4   | 0.8733624  | 773   | 2.232362   |
| 6569  | GO:0009205            | purine ribonucleoside triph  | 0.99 | 4   | 0.8733624  | 773   | 2.232362   |
| 6571  | GO:0009207            | purine ribonucleoside triph  | 0.99 | 4   | 0.8733624  | 773   | 2.232362   |
| 6624  | GO:0009261            | ribonucleotide catabolic p   | 0.99 | 4   | 0.8733624  | 773   | 2.232362   |
| 17034 | GO:0034655            | nucleobase, nucleoside, r    | 0.99 | 4   | 0.8733624  | 773   | 2.232362   |
| 17035 | GO:0034656            | nucleobase, nucleoside a     | 0.99 | 4   | 0.8733624  | 773   | 2.232362   |
| 22209 | GO:0046700            | heterocycle catabolic pro    | 0.99 | 4   | 0.8733624  | 773   | 2.232362   |
| 30879 | GO:0072523            | purine-containing compou     | 0.99 | 4   | 0.8733624  | 773   | 2.232362   |
| 17020 | GO:0034641            | cellular nitrogen compou     | 0.99 | 34  | 7.4235806  | 3678  | 10.621769  |
| 20520 | GO:0044270            | cellular nitrogen compou     | 0.99 | 4   | 0.8733624  | 777   | 2.2439137  |
| 11522 | GO:0019538 GO:0006411 | protein metabolic process    | 0.99 | 39  | 8.515284   | 4134  | 11.938661  |
| 7229  | GO:0009987 GO:0008151 | cellular process             | 0.99 | 117 | 25.54585   | 10601 | 30.614838  |
| 6563  | GO:0009199            | ribonucleoside triphospha    | 0.99 | 4   | 0.8733624  | 790   | 2.2814567  |



|       |                       |                             |      |     |            |       |           |
|-------|-----------------------|-----------------------------|------|-----|------------|-------|-----------|
| 6515  | GO:0009150            | purine ribonucleotide met   | 0.99 | 4   | 0.8733624  | 791   | 2.2843447 |
| 6506  | GO:0009141            | nucleoside triphosphate m   | 0.99 | 4   | 0.8733624  | 796   | 2.2987843 |
| 2653  | GO:0003723            | RNA binding                 | 0.99 | 4   | 0.8733624  | 797   | 2.3016722 |
| 4906  | GO:0006807            | nitrogen compound metabol   | 0.99 | 34  | 7.4235806  | 3725  | 10.757502 |
| 12574 | GO:0022892            | substrate-specific transpo  | 0.99 | 10  | 2.183406   | 1463  | 4.2250266 |
| 4373  | GO:0006163            | purine nucleotide metabo    | 0.99 | 4   | 0.8733624  | 810   | 2.339215  |
| 6622  | GO:0009259 GO:000912  | ribonucleotide metabolic p  | 0.99 | 4   | 0.8733624  | 812   | 2.344991  |
| 30877 | GO:0072521            | purine-containing compou    | 1.00 | 4   | 0.8733624  | 827   | 2.3883097 |
| 4357  | GO:0006139 GO:0055134 | nucleobase, nucleoside, r   | 1.00 | 28  | 6.1135373  | 3285  | 9.486816  |
| 3177  | GO:0004518            | nuclease activity           | 1.00 | 1   | 0.2183406  | 427   | 1.2331418 |
| 2627  | GO:0003676            | nucleic acid binding        | 1.00 | 19  | 4.148472   | 2453  | 7.0840673 |
| 20517 | GO:0044267            | cellular protein metabolic  | 1.00 | 27  | 5.8951964  | 3225  | 9.313541  |
| 3876  | GO:0005515 GO:0045308 | protein binding             | 1.00 | 69  | 15.065502  | 6933  | 20.021948 |
| 20498 | GO:0044248            | cellular catabolic process  | 1.00 | 4   | 0.8733624  | 894   | 2.5818002 |
| 4027  | GO:0005737            | cytoplasm                   | 1.00 | 14  | 3.0567687  | 2001  | 5.7787275 |
| 3863  | GO:0005488            | binding                     | 1.00 | 155 | 33.842796  | 13903 | 40.15075  |
| 18000 | GO:0005639            | purine ribonucleoside triph | 1.00 | 3   | 0.65502185 | 769   | 2.2208104 |
| 19473 | GO:0043170 GO:0043283 | macromolecule metabolic     | 1.00 | 64  | 13.973799  | 6553  | 18.92454  |
| 4867  | GO:0006753            | nucleoside phosphate me     | 1.00 | 4   | 0.8733624  | 914   | 2.6395588 |
| 6484  | GO:0009117            | nucleotide metabolic proc   | 1.00 | 4   | 0.8733624  | 914   | 2.6395588 |
| 15392 | GO:0032991            | macromolecular complex      | 1.00 | 10  | 2.183406   | 1616  | 4.666878  |
| 14959 | GO:0032553            | ribonucleotide binding      | 1.00 | 3   | 0.65502185 | 795   | 2.2958963 |
| 14961 | GO:0032555            | purine ribonucleotide bind  | 1.00 | 3   | 0.65502185 | 795   | 2.2958963 |
| 10033 | GO:0017076            | purine nucleotide binding   | 1.00 | 3   | 0.65502185 | 797   | 2.3016722 |
| 3723  | GO:0005215 GO:0005478 | transporter activity        | 1.00 | 12  | 2.6200874  | 1844  | 5.325324  |
| 26932 | GO:00055086           | nucleobase, nucleoside a    | 1.00 | 4   | 0.8733624  | 944   | 2.7261963 |
| 4109  | GO:0005840 GO:0033279 | ribosome                    | 1.00 | 2   | 0.4366812  | 682   | 1.9695613 |
| 22007 | GO:0046483            | heterocycle metabolic pro   | 1.00 | 5   | 1.091703   | 1094  | 3.1593843 |
| 20510 | GO:0044260 GO:0034966 | cellular macromolecule m    | 1.00 | 51  | 11.135371  | 5577  | 16.105928 |
| 18953 | GO:0042623            | ATPase activity, coupled    | 1.00 | 1   | 0.2183406  | 537   | 1.550813  |
| 13018 | GO:0030529            | ribonucleoprotein complex   | 1.00 | 2   | 0.4366812  | 741   | 2.1399486 |
| 20638 | GO:0044444            | cytoplasmic part            | 1.00 | 9   | 1.9650655  | 1644  | 4.7477403 |
| 20618 | GO:0044424            | intracellular part          | 1.00 | 30  | 6.550218   | 3853  | 11.127155 |
| 19525 | GO:0043226            | organelle                   | 1.00 | 20  | 4.366812   | 3013  | 8.701303  |
| 19528 | GO:0043229            | intracellular organelle     | 1.00 | 20  | 4.366812   | 3013  | 8.701303  |
| 131   | GO:0000166            | nucleotide binding          | 1.00 | 4   | 0.8733624  | 1213  | 3.5030468 |
| 19527 | GO:0043228            | non-membrane-bounded c      | 1.00 | 2   | 0.4366812  | 923   | 2.66555   |
| 19531 | GO:0043232            | intracellular non-membrar   | 1.00 | 2   | 0.4366812  | 923   | 2.66555   |
| 3903  | GO:0005575 GO:0008372 | cellular component          | 1.00 | 78  | 17.030567  | 8515  | 24.590637 |
| 3945  | GO:0005622            | intracellular               | 1.00 | 35  | 7.6419215  | 4751  | 13.720507 |
| 3946  | GO:0005623            | cell                        | 1.00 | 72  | 15.720524  | 8227  | 23.758917 |
| 20657 | GO:0044464            | cell part                   | 1.00 | 72  | 15.720524  | 8227  | 23.758917 |
