# Supplementary material for: The Tomato Hybrid Proline-rich Protein regulates the abscission zone competence to respond to ethylene signals
Source: PubMed Central journal article supplement (PMC5981600; doi:10.1038/s41438-018-0033-2), 2018-06-01
Supplement: 41438_2018_33_MOESM4_ESM.pdf [file 41438_2018_33_MOESM4_ESM.pdf]

Table S4. Differentially regulated genes (up and down regulated) in the control compared with THyPRP silenced plants in FAZ at 8 h along with their expression values, fold changes, annotations, GO ids and terms.

Worksheet 2 & 3

| Set3                 |                  |          |      |                 |       |
|----------------------|------------------|----------|------|-----------------|-------|
| Line                 | Array            | Details  | Time | Treated vs. Con | Set   |
| Control – New Yorker | 254331010026_1_1 | 8h_5_AZ  | 8h   | Control         | Set 3 |
| Control – New Yorker | 254331010026_1_2 | 8h_6_AZ  | 8h   |                 |       |
| TAPG + TPRP          | 254331010035_1_1 | 8h_41_AZ | 8h   | Treated         |       |
| TAPG + TPRP          | 254331010035_1_2 | 8h_42_AZ | 8h   |                 |       |

**Note:**

Fold change expression values are provided as logbase 2

**Flagging Criteria:**

Compromised: If the gProcessedSignal value is less than the background intensity

Detected: If the gProcessedSignal value is above background intensity

| Column Header   | Description                                                     |
|-----------------|-----------------------------------------------------------------|
| ProbeName       | Unique probe identifier                                         |
| GeneName        | GeneSymbol                                                      |
| Fold            | Fold change calculated is log base 2                            |
| Flag            | Detected or Compromised                                         |
| GeomeanFold     | Average Fold change for the replicates calculated is log base 2 |
| p-Value         | t-test p- value                                                 |
| gProcessedSigna | Background subtracted signal intensity                          |

Worksheet 4 & 5

This file contains the fold change for all the spots in the array

**GO ID**

Gene Ontology ID

**GO ACCESSION**

Gene Ontology Function name

**p-value :**

The probability of obtaining the specified GO accession number from a list of random entities. Less the p-value more significant is the GO accession number.

**Significant pvalue<0.05**

**Count in Selection :**

This refers to the number of genes in the selected entity (for example, from T-test) list which have that particular GO term.

**%Count in Selection :**

This refers to the percentage of genes in the input entity list which have that GO term.

**Count in Total :**

This refers to the number of genes in All Entities which have that GO term.

**%Count in Total :**

This refers to the percentage of genes in the All Entities list which have that GO term.

Cut off used to filter up and down regulated genes

**Upregulated**

For filtering upregulation we consider flag should be Detected in the treated sample and can be Compromised or Detected in the control sample and fold>=0.8 in the individual replicates and fold>=1 in the Geomean of treated samples.

**Downregulated**

For filtering downregulation we consider flag can be Detected or Compromised in the treated sample and should be Detected in the control sample and fold<=-0.8 in the individual replicates and fold<=-1 in the Geomean of treated samples.

**Differentially Regulated Probes**

| Sample                                 | Up   | Down |
|----------------------------------------|------|------|
| 8h_TPRP_AZ vs. 8h_Control_AZ_Sense     | 1314 | 2139 |
| 8h_TPRP_AZ vs. 8h_Control_AZ_Antisense | 424  | 1983 |





| GT | Series | 2020 | 2021 | 2022 | 2023 | 2024 | 2025 | 2026 | 2027 | 2028 | 2029 | 2030 | 2031 | 2032 | 2033 | 2034 | 2035 | 2036 | 2037 | 2038 | 2039 | 2040 | 2041 | 2042 | 2043 | 2044 | 2045 | 2046 | 2047 | 2048 | 2049 | 2050 | 2051 | 2052 | 2053 | 2054 | 2055 | 2056 | 2057 | 2058 | 2059 | 2060 | 2061 | 2062 | 2063 | 2064 | 2065 | 2066 | 2067 | 2068 | 2069 | 2070 | 2071 | 2072 | 2073 | 2074 | 2075 | 2076 | 2077 | 2078 | 2079 | 2080 | 2081 | 2082 | 2083 | 2084 | 2085 | 2086 | 2087 | 2088 | 2089 | 2090 | 2091 | 2092 | 2093 | 2094 | 2095 | 2096 | 2097 | 2098 | 2099 | 2100 |
|----|--------|------|------|------|------|------|------|------|------|------|------|------|------|------|------|------|------|------|------|------|------|------|------|------|------|------|------|------|------|------|------|------|------|------|------|------|------|------|------|------|------|------|------|------|------|------|------|------|------|------|------|------|------|------|------|------|------|------|------|------|------|------|------|------|------|------|------|------|------|------|------|------|------|------|------|------|------|------|------|------|------|------|
| GT | Series | 2020 | 2021 | 2022 | 2023 | 2024 | 2025 | 2026 | 2027 | 2028 | 2029 | 2030 | 2031 | 2032 | 2033 | 2034 | 2035 | 2036 | 2037 | 2038 | 2039 | 2040 | 2041 | 2042 | 2043 | 2044 | 2045 | 2046 | 2047 | 2048 | 2049 | 2050 | 2051 | 2052 | 2053 | 2054 | 2055 | 2056 | 2057 | 2058 | 2059 | 2060 | 2061 | 2062 | 2063 | 2064 | 2065 | 2066 | 2067 | 2068 | 2069 | 2070 | 2071 | 2072 | 2073 | 2074 | 2075 | 2076 | 2077 | 2078 | 2079 | 2080 | 2081 | 2082 | 2083 | 2084 | 2085 | 2086 | 2087 | 2088 | 2089 | 2090 | 2091 | 2092 | 2093 | 2094 | 2095 | 2096 | 2097 | 2098 | 2099 | 2100 |
| GT | Series | 2020 | 2021 | 2022 | 2023 | 2024 | 2025 | 2026 | 2027 | 2028 | 2029 | 2030 | 2031 | 2032 | 2033 | 2034 | 2035 | 2036 | 2037 | 2038 | 2039 | 2040 | 2041 | 2042 | 2043 | 2044 | 2045 | 2046 | 2047 | 2048 | 2049 | 2050 | 2051 | 2052 | 2053 | 2054 | 2055 | 2056 | 2057 | 2058 | 2059 | 2060 | 2061 | 2062 | 2063 | 2064 | 2065 | 2066 | 2067 | 2068 | 2069 | 2070 | 2071 | 2072 | 2073 | 2074 | 2075 | 2076 | 2077 | 2078 | 2079 | 2080 | 2081 | 2082 | 2083 | 2084 | 2085 | 2086 | 2087 | 2088 | 2089 | 2090 | 2091 | 2092 | 2093 | 2094 | 2095 | 2096 | 2097 | 2098 | 2099 | 2100 |















| OT | Series | 2024 | 2023 | 2022 | 2021 | 2020 | 2019 | 2018 | 2017 | 2016 | 2015 | 2014 | 2013 | 2012 | 2011 | 2010 | 2009 | 2008 | 2007 | 2006 | 2005 | 2004 | 2003 | 2002 | 2001 | 2000 | 1999 | 1998 | 1997 | 1996 | 1995 | 1994 | 1993 | 1992 | 1991 | 1990 | 1989 | 1988 | 1987 | 1986 | 1985 | 1984 | 1983 | 1982 | 1981 | 1980 | 1979 | 1978 | 1977 | 1976 | 1975 | 1974 | 1973 | 1972 | 1971 | 1970 | 1969 | 1968 | 1967 | 1966 | 1965 | 1964 | 1963 | 1962 | 1961 | 1960 | 1959 | 1958 | 1957 | 1956 | 1955 | 1954 | 1953 | 1952 | 1951 | 1950 | 1949 | 1948 | 1947 | 1946 | 1945 | 1944 | 1943 | 1942 | 1941 | 1940 | 1939 | 1938 | 1937 | 1936 | 1935 | 1934 | 1933 | 1932 | 1931 | 1930 | 1929 | 1928 | 1927 | 1926 | 1925 | 1924 | 1923 | 1922 | 1921 | 1920 | 1919 | 1918 | 1917 | 1916 | 1915 | 1914 | 1913 | 1912 | 1911 | 1910 | 1909 | 1908 | 1907 | 1906 | 1905 | 1904 | 1903 | 1902 | 1901 | 1900 | 1899 | 1898 | 1897 | 1896 | 1895 | 1894 | 1893 | 1892 | 1891 | 1890 | 1889 | 1888 | 1887 | 1886 | 1885 | 1884 | 1883 | 1882 | 1881 | 1880 | 1879 | 1878 | 1877 | 1876 | 1875 | 1874 | 1873 | 1872 | 1871 | 1870 | 1869 | 1868 | 1867 | 1866 | 1865 | 1864 | 1863 | 1862 | 1861 | 1860 | 1859 | 1858 | 1857 | 1856 | 1855 | 1854 | 1853 | 1852 | 1851 | 1850 | 1849 | 1848 | 1847 | 1846 | 1845 | 1844 | 1843 | 1842 | 1841 | 1840 | 1839 | 1838 | 1837 | 1836 | 1835 | 1834 | 1833 | 1832 | 1831 | 1830 | 1829 | 1828 | 1827 | 1826 | 1825 | 1824 | 1823 | 1822 | 1821 | 1820 | 1819 | 1818 | 1817 | 1816 | 1815 | 1814 | 1813 | 1812 | 1811 | 1810 | 1809 | 1808 | 1807 | 1806 | 1805 | 1804 | 1803 | 1802 | 1801 | 1800 | 1799 | 1798 | 1797 | 1796 | 1795 | 1794 | 1793 | 1792 | 1791 | 1790 | 1789 | 1788 | 1787 | 1786 | 1785 | 1784 | 1783 | 1782 | 1781 | 1780 | 1779 | 1778 | 1777 | 1776 | 1775 | 1774 | 1773 | 1772 | 1771 | 1770 | 1769 | 1768 | 1767 | 1766 | 1765 | 1764 | 1763 | 1762 | 1761 | 1760 | 1759 | 1758 | 1757 | 1756 | 1755 | 1754 | 1753 | 1752 | 1751 | 1750 | 1749 | 1748 | 1747 | 1746 | 1745 | 1744 | 1743 | 1742 | 1741 | 1740 | 1739 | 1738 | 1737 | 1736 | 1735 | 1734 | 1733 | 1732 | 1731 | 1730 | 1729 | 1728 | 1727 | 1726 | 1725 | 1724 | 1723 | 1722 | 1721 | 1720 | 1719 | 1718 | 1717 | 1716 | 1715 | 1714 | 1713 | 1712 | 1711 | 1710 | 1709 | 1708 | 1707 | 1706 | 1705 | 1704 | 1703 | 1702 | 1701 | 1700 | 1699 | 1698 | 1697 | 1696 | 1695 | 1694 | 1693 | 1692 | 1691 | 1690 | 1689 | 1688 | 1687 | 1686 | 1685 | 1684 | 1683 | 1682 | 1681 | 1680 | 1679 | 1678 | 1677 | 1676 | 1675 | 1674 | 1673 | 1672 | 1671 | 1670 | 1669 | 1668 | 1667 | 1666 | 1665 | 1664 | 1663 | 1662 | 1661 | 1660 | 1659 | 1658 | 1657 | 1656 | 1655 | 1654 | 1653 | 1652 | 1651 | 1650 | 1649 | 1648 | 1647 | 1646 | 1645 | 1644 | 1643 | 1642 | 1641 | 1640 | 1639 | 1638 | 1637 | 1636 | 1635 | 1634 | 1633 | 1632 | 1631 | 1630 | 1629 | 1628 | 1627 | 1626 | 1625 | 1624 | 1623 | 1622 | 1621 | 1620 | 1619 | 1618 | 1617 | 1616 | 1615 | 1614 | 1613 | 1612 | 1611 | 1610 | 1609 | 1608 | 1607 | 1606 | 1605 | 1604 | 1603 | 1602 | 1601 | 1600 | 1599 | 1598 | 1597 | 1596 | 1595 | 1594 | 1593 | 1592 | 1591 | 1590 | 1589 | 1588 | 1587 | 1586 | 1585 | 1584 | 1583 | 1582 | 1581 | 1580 | 1579 | 1578 | 1577 | 1576 | 1575 | 1574 | 1573 | 1572 | 1571 | 1570 | 1569 | 1568 | 1567 | 1566 | 1565 | 1564 | 1563 | 1562 | 1561 | 1560 | 1559 | 1558 | 1557 | 1556 | 1555 | 1554 | 1553 | 1552 | 1551 | 1550 | 1549 | 1548 | 1547 | 1546 | 1545 | 1544 | 1543 | 1542 | 1541 | 1540 | 1539 | 1538 | 1537 | 1536 | 1535 | 1534 | 1533 | 1532 | 1531 | 1530 | 1529 | 1528 | 1527 | 1526 | 1525 | 1524 | 1523 | 1522 | 1521 | 1520 | 1519 | 1518 | 1517 | 1516 | 1515 | 1514 | 1513 | 1512 | 1511 | 1510 | 1509 | 1508 | 1507 | 1506 | 1505 | 1504 | 1503 | 1502 | 1501 | 1500 | 1499 | 1498 | 1497 | 1496 | 1495 | 1494 | 1493 | 1492 | 1491 | 1490 | 1489 | 1488 | 1487 | 1486 | 1485 | 1484 | 1483 | 1482 | 1481 | 1480 | 1479 | 1478 | 1477 | 1476 | 1475 | 1474 | 1473 | 1472 | 1471 | 1470 | 1469 | 1468 | 1467 | 1466 | 1465 | 1464 | 1463 | 1462 | 1461 | 1460 | 1459 | 1458 | 1457 | 1456 | 1455 | 1454 | 1453 | 1452 | 1451 | 1450 | 1449 | 1448 | 1447 | 1446 | 1445 | 1444 | 1443 | 1442 | 1441 | 1440 | 1439 | 1438 | 1437 | 1436 | 1435 | 1434 | 1433 | 1432 | 1431 | 1430 | 1429 | 1428 | 1427 | 1426 | 1425 | 1424 | 1423 | 1422 | 1421 | 1420 | 1419 | 1418 | 1417 | 1416 | 1415 | 1414 | 1413 | 1412 | 1411 | 1410 | 1409 | 1408 | 1407 | 1406 | 1405 | 1404 | 1403 | 1402 | 1401 | 1400 | 1399 | 1398 | 1397 | 1396 | 1395 | 1394 | 1393 | 1392 | 1391 | 1390 | 1389 | 1388 | 1387 | 1386 | 1385 | 1384 | 1383 | 1382 | 1381 | 1380 | 1379 | 1378 | 1377 | 1376 | 1375 | 1374 | 1373 | 1372 | 1371 | 1370 | 1369 | 1368 | 1367 | 1366 | 1365 | 1364 | 1363 | 1362 | 1361 | 1360 | 1359 | 1358 | 1357 | 1356 | 1355 | 1354 | 1353 | 1352 | 1351 | 1350 | 1349 | 1348 | 1347 | 1346 | 1345 | 1344 | 1343 | 1342 | 1341 | 1340 | 1339 | 1338 | 1337 | 1336 | 1335 | 1334 | 1333 | 1332 | 1331 | 1330 | 1329 | 1328 | 1327 | 1326 | 1325 | 1324 | 1323 | 1322 | 1321 | 1320 | 1319 | 1318 | 1317 | 1316 | 1315 | 1314 | 1313 | 1312 | 1311 | 1310 | 1309 | 1308 | 1307 | 1306 | 1305 | 1304 | 1303 | 1302 | 1301 | 1300 | 1299 | 1298 | 1297 | 1296 | 1295 | 1294 | 1293 | 1292 | 1291 | 1290 | 1289 | 1288 | 1287 | 1286 | 1285 | 1284 | 1283 | 1282 | 1281 | 1280 | 1279 | 1278 | 1277 | 1276 | 1275 | 1274 | 1273 | 1272 | 1271 | 1270 | 1269 | 1268 | 1267 | 1266 | 1265 | 1264 | 1263 | 1262 | 1261 | 1260 | 1259 | 1258 | 1257 | 1256 | 1255 | 1254 | 1253 | 1252 | 1251 | 1250 | 1249 | 1248 | 1247 | 1246 | 1245 | 1244 | 1243 | 1242 | 1241 | 1240 | 1239 | 1238 | 1237 | 1236 | 1235 | 1234 | 1233 | 1232 | 1231 | 1230 | 1229 | 1228 | 1227 | 1226 | 1225 | 1224 | 1223 | 1222 | 1221 | 1220 | 1219 | 1218 | 1217 | 1216 | 1215 | 1214 | 1213 | 1212 | 1211 | 1210 | 1209 | 1208 | 1207 | 1206 | 1205 | 1204 | 1203 | 1202 | 1201 | 1200 | 1199 | 1198 | 1197 | 1196 | 1195 | 1194 | 1193 | 1192 | 1191 | 1190 | 1189 | 1188 | 1187 | 1186 | 1185 | 1184 | 1183 | 1182 | 1181 | 1180 | 1179 | 1178 | 1177 | 1176 | 1175 | 1174 | 1173 | 1172 | 1171 | 1170 | 1169 | 1168 | 1167 | 1166 | 1165 | 1164 | 1163 | 1162 | 1161 | 1160 | 1159 | 1158 | 1157 | 1156 | 1155 | 1154 | 1153 | 1152 | 1151 | 1150 | 1149 | 1148 | 1147 | 1146 | 1145 | 1144 | 1143 | 1142 | 1141 | 1140 | 1139 | 1138 | 1137 | 1136 | 1135 | 1134 | 1133 | 1132 | 1131 | 1130 | 1129 | 1128 | 1127 | 1126 | 1125 | 1124 | 1123 | 1122 | 1121 | 1120 | 1119 | 1118 | 1117 | 1116 | 1115 | 1114 | 1113 | 1112 | 1111 | 1110 | 1109 | 1108 | 1107 | 1106 | 1105 | 1104 | 1103 | 1102 | 1101 | 1100 | 1099 | 1098 | 1097 | 1096 | 1095 | 1094 | 1093 | 1092 | 1091 | 1090 | 1089 | 1088 | 1087 | 1086 | 1085 | 1084 | 1083 | 1082 | 1081 | 1080 | 1079 | 1078 | 1077 | 1076 | 1075 | 1074 | 1073 | 1072 | 1071 | 1070 | 1069 | 1068 | 1067 | 1066 | 1065 | 1064 | 1063 | 1062 | 1061 | 1060 | 1059 | 1058 | 1057 | 1056 | 1055 | 1054 | 1053 | 1052 | 1051 | 1050 | 1049 | 1048 | 1047 | 1046 | 1045 | 1044 | 1043 | 1042 | 1041 | 1040 | 1039 | 1038 | 1037 | 1036 | 1035 | 1034 | 1033 | 1032 | 1031 | 1030 | 1029 | 1028 | 1027 | 1026 | 1025 | 1024 | 1023 | 1022 | 1021 | 1020 | 1019 | 1018 | 1017 | 1016 | 1015 | 1014 | 1013 | 1012 | 1011 | 1010 | 1009 | 1008 | 1007 | 1006 | 1005 | 1004 | 1003 | 1002 | 1001 | 1000 | 999 | 998 | 997 | 996 | 995 | 994 | 993 | 992 | 991 | 990 | 989 | 988 | 987 | 986 | 985 | 984 | 983 | 982 | 981 | 980 | 979 | 978 | 977 | 976 | 975 | 974 | 973 | 972 | 971 | 970 | 969 | 968 | 967 | 966 | 965 | 964 | 963 | 962 | 961 | 960 | 959 | 958 | 957 | 956 | 955 | 954 | 953 | 952 | 951 | 950 | 949 | 948 | 947 | 946 | 945 | 944 | 943 | 942 | 941 | 940 | 939 | 938 | 937 | 936 | 935 | 934 | 933 | 932 | 931 | 930 | 929 | 928 | 927 | 926 | 925 | 924 | 923 | 922 | 921 | 920 | 919 | 918 | 917 | 916 | 915 | 914 | 913 | 912 | 911 | 910 | 909 | 908 | 907 | 906 | 905 | 904 | 903 | 902 | 901 | 900 | 899 | 898 | 897 | 896 | 895 | 894 | 893 | 892 | 891 | 890 | 889 | 888 | 887 | 886 | 885 | 884 | 883 | 882 | 881 | 880 | 879 | 878 | 877 | 876 | 875 | 874 | 873 | 872 | 871 | 870 | 869 | 868 | 867 | 866 | 865 | 864 | 863 | 862 | 861 | 860 | 859 | 858 | 857 | 856 | 855 | 854 | 853 | 852 | 851 | 850 | 849 | 848 | 847 | 846 | 845 | 844 | 843 | 842 | 841 | 840 | 839 | 838 | 837 | 836 | 835 | 834 | 833 | 832 | 831 | 830 | 829 | 828 | 827 | 826 | 825 | 824 | 823 | 822 | 821 | 820 | 819 | 818 | 817 | 816 | 815 | 814 | 813 | 812 | 811 | 810 | 809 | 808 | 807 | 806 | 805 | 804 | 803 | 802 | 801 | 800 | 799 | 798 | 797 | 796 | 795 | 794 | 793 | 792 | 791 | 790 | 789 | 788 | 787 | 786 | 785 | 784 | 783 | 782 | 781 | 780 | 779 | 778 | 777 | 776 | 775 | 774 | 773 | 772 | 771 | 770 | 769 |
|----|--------|------|------|------|------|------|------|------|------|------|------|------|------|------|------|------|------|------|------|------|------|------|------|------|------|------|------|------|------|------|------|------|------|------|------|------|------|------|------|------|------|------|------|------|------|------|------|------|------|------|------|------|------|------|------|------|------|------|------|------|------|------|------|------|------|------|------|------|------|------|------|------|------|------|------|------|------|------|------|------|------|------|------|------|------|------|------|------|------|------|------|------|------|------|------|------|------|------|------|------|------|------|------|------|------|------|------|------|------|------|------|------|------|------|------|------|------|------|------|------|------|------|------|------|------|------|------|------|------|------|------|------|------|------|------|------|------|------|------|------|------|------|------|------|------|------|------|------|------|------|------|------|------|------|------|------|------|------|------|------|------|------|------|------|------|------|------|------|------|------|------|------|------|------|------|------|------|------|------|------|------|------|------|------|------|------|------|------|------|------|------|------|------|------|------|------|------|------|------|------|------|------|------|------|------|------|------|------|------|------|------|------|------|------|------|------|------|------|------|------|------|------|------|------|------|------|------|------|------|------|------|------|------|------|------|------|------|------|------|------|------|------|------|------|------|------|------|------|------|------|------|------|------|------|------|------|------|------|------|------|------|------|------|------|------|------|------|------|------|------|------|------|------|------|------|------|------|------|------|------|------|------|------|------|------|------|------|------|------|------|------|------|------|------|------|------|------|------|------|------|------|------|------|------|------|------|------|------|------|------|------|------|------|------|------|------|------|------|------|------|------|------|------|------|------|------|------|------|------|------|------|------|------|------|------|------|------|------|------|------|------|------|------|------|------|------|------|------|------|------|------|------|------|------|------|------|------|------|------|------|------|------|------|------|------|------|------|------|------|------|------|------|------|------|------|------|------|------|------|------|------|------|------|------|------|------|------|------|------|------|------|------|------|------|------|------|------|------|------|------|------|------|------|------|------|------|------|------|------|------|------|------|------|------|------|------|------|------|------|------|------|------|------|------|------|------|------|------|------|------|------|------|------|------|------|------|------|------|------|------|------|------|------|------|------|------|------|------|------|------|------|------|------|------|------|------|------|------|------|------|------|------|------|------|------|------|------|------|------|------|------|------|------|------|------|------|------|------|------|------|------|------|------|------|------|------|------|------|------|------|------|------|------|------|------|------|------|------|------|------|------|------|------|------|------|------|------|------|------|------|------|------|------|------|------|------|------|------|------|------|------|------|------|------|------|------|------|------|------|------|------|------|------|------|------|------|------|------|------|------|------|------|------|------|------|------|------|------|------|------|------|------|------|------|------|------|------|------|------|------|------|------|------|------|------|------|------|------|------|------|------|------|------|------|------|------|------|------|------|------|------|------|------|------|------|------|------|------|------|------|------|------|------|------|------|------|------|------|------|------|------|------|------|------|------|------|------|------|------|------|------|------|------|------|------|------|------|------|------|------|------|------|------|------|------|------|------|------|------|------|------|------|------|------|------|------|------|------|------|------|------|------|------|------|------|------|------|------|------|------|------|------|------|------|------|------|------|------|------|------|------|------|------|------|------|------|------|------|------|------|------|------|------|------|------|------|------|------|------|------|------|------|------|------|------|------|------|------|------|------|------|------|------|------|------|------|------|------|------|------|------|------|------|------|------|------|------|------|------|------|------|------|------|------|------|------|------|------|------|------|------|------|------|------|------|------|------|------|------|------|------|------|------|------|------|------|------|------|------|------|------|------|------|------|------|------|------|------|------|------|------|------|------|------|------|------|------|------|------|------|------|------|------|------|------|------|------|------|------|------|------|------|------|------|------|------|------|------|------|------|------|------|------|------|------|------|------|------|------|------|------|------|------|------|------|------|------|------|------|------|------|------|------|------|------|------|------|------|------|------|------|------|------|------|------|------|------|------|------|------|------|------|------|------|------|------|------|------|------|------|------|------|------|------|------|------|------|------|------|------|------|------|------|------|------|------|------|------|------|------|------|------|------|------|------|------|------|------|------|------|------|------|------|------|------|------|------|------|------|------|------|------|------|------|------|------|------|------|------|------|------|------|------|------|------|------|------|------|------|------|------|------|------|------|------|------|------|------|------|------|------|------|------|------|------|------|------|------|------|------|------|------|------|------|------|------|------|------|------|------|------|------|------|------|------|------|------|------|------|------|------|------|------|------|------|------|------|------|------|------|------|------|------|------|------|------|------|------|------|------|------|------|------|------|------|------|------|------|------|------|------|------|------|------|------|------|------|------|------|------|------|------|------|------|------|------|------|------|------|------|------|------|------|------|------|------|------|------|------|------|------|------|------|------|------|------|------|------|------|------|------|------|------|------|------|------|------|------|------|------|------|------|------|------|------|------|------|------|------|------|------|------|------|------|------|------|-----|-----|-----|-----|-----|-----|-----|-----|-----|-----|-----|-----|-----|-----|-----|-----|-----|-----|-----|-----|-----|-----|-----|-----|-----|-----|-----|-----|-----|-----|-----|-----|-----|-----|-----|-----|-----|-----|-----|-----|-----|-----|-----|-----|-----|-----|-----|-----|-----|-----|-----|-----|-----|-----|-----|-----|-----|-----|-----|-----|-----|-----|-----|-----|-----|-----|-----|-----|-----|-----|-----|-----|-----|-----|-----|-----|-----|-----|-----|-----|-----|-----|-----|-----|-----|-----|-----|-----|-----|-----|-----|-----|-----|-----|-----|-----|-----|-----|-----|-----|-----|-----|-----|-----|-----|-----|-----|-----|-----|-----|-----|-----|-----|-----|-----|-----|-----|-----|-----|-----|-----|-----|-----|-----|-----|-----|-----|-----|-----|-----|-----|-----|-----|-----|-----|-----|-----|-----|-----|-----|-----|-----|-----|-----|-----|-----|-----|-----|-----|-----|-----|-----|-----|-----|-----|-----|-----|-----|-----|-----|-----|-----|-----|-----|-----|-----|-----|-----|-----|-----|-----|-----|-----|-----|-----|-----|-----|-----|-----|-----|-----|-----|-----|-----|-----|-----|-----|-----|-----|-----|-----|-----|-----|-----|-----|-----|-----|-----|-----|-----|-----|-----|-----|-----|-----|-----|-----|-----|-----|-----|-----|-----|-----|-----|-----|-----|-----|-----|-----|-----|-----|-----|-----|-----|-----|-----|-----|-----|-----|-----|-----|
|----|--------|------|------|------|------|------|------|------|------|------|------|------|------|------|------|------|------|------|------|------|------|------|------|------|------|------|------|------|------|------|------|------|------|------|------|------|------|------|------|------|------|------|------|------|------|------|------|------|------|------|------|------|------|------|------|------|------|------|------|------|------|------|------|------|------|------|------|------|------|------|------|------|------|------|------|------|------|------|------|------|------|------|------|------|------|------|------|------|------|------|------|------|------|------|------|------|------|------|------|------|------|------|------|------|------|------|------|------|------|------|------|------|------|------|------|------|------|------|------|------|------|------|------|------|------|------|------|------|------|------|------|------|------|------|------|------|------|------|------|------|------|------|------|------|------|------|------|------|------|------|------|------|------|------|------|------|------|------|------|------|------|------|------|------|------|------|------|------|------|------|------|------|------|------|------|------|------|------|------|------|------|------|------|------|------|------|------|------|------|------|------|------|------|------|------|------|------|------|------|------|------|------|------|------|------|------|------|------|------|------|------|------|------|------|------|------|------|------|------|------|------|------|------|------|------|------|------|------|------|------|------|------|------|------|------|------|------|------|------|------|------|------|------|------|------|------|------|------|------|------|------|------|------|------|------|------|------|------|------|------|------|------|------|------|------|------|------|------|------|------|------|------|------|------|------|------|------|------|------|------|------|------|------|------|------|------|------|------|------|------|------|------|------|------|------|------|------|------|------|------|------|------|------|------|------|------|------|------|------|------|------|------|------|------|------|------|------|------|------|------|------|------|------|------|------|------|------|------|------|------|------|------|------|------|------|------|------|------|------|------|------|------|------|------|------|------|------|------|------|------|------|------|------|------|------|------|------|------|------|------|------|------|------|------|------|------|------|------|------|------|------|------|------|------|------|------|------|------|------|------|------|------|------|------|------|------|------|------|------|------|------|------|------|------|------|------|------|------|------|------|------|------|------|------|------|------|------|------|------|------|------|------|------|------|------|------|------|------|------|------|------|------|------|------|------|------|------|------|------|------|------|------|------|------|------|------|------|------|------|------|------|------|------|------|------|------|------|------|------|------|------|------|------|------|------|------|------|------|------|------|------|------|------|------|------|------|------|------|------|------|------|------|------|------|------|------|------|------|------|------|------|------|------|------|------|------|------|------|------|------|------|------|------|------|------|------|------|------|------|------|------|------|------|------|------|------|------|------|------|------|------|------|------|------|------|------|------|------|------|------|------|------|------|------|------|------|------|------|------|------|------|------|------|------|------|------|------|------|------|------|------|------|------|------|------|------|------|------|------|------|------|------|------|------|------|------|------|------|------|------|------|------|------|------|------|------|------|------|------|------|------|------|------|------|------|------|------|------|------|------|------|------|------|------|------|------|------|------|------|------|------|------|------|------|------|------|------|------|------|------|------|------|------|------|------|------|------|------|------|------|------|------|------|------|------|------|------|------|------|------|------|------|------|------|------|------|------|------|------|------|------|------|------|------|------|------|------|------|------|------|------|------|------|------|------|------|------|------|------|------|------|------|------|------|------|------|------|------|------|------|------|------|------|------|------|------|------|------|------|------|------|------|------|------|------|------|------|------|------|------|------|------|------|------|------|------|------|------|------|------|------|------|------|------|------|------|------|------|------|------|------|------|------|------|------|------|------|------|------|------|------|------|------|------|------|------|------|------|------|------|------|------|------|------|------|------|------|------|------|------|------|------|------|------|------|------|------|------|------|------|------|------|------|------|------|------|------|------|------|------|------|------|------|------|------|------|------|------|------|------|------|------|------|------|------|------|------|------|------|------|------|------|------|------|------|------|------|------|------|------|------|------|------|------|------|------|------|------|------|------|------|------|------|------|------|------|------|------|------|------|------|------|------|------|------|------|------|------|------|------|------|------|------|------|------|------|------|------|------|------|------|------|------|------|------|------|------|------|------|------|------|------|------|------|------|------|------|------|------|------|------|------|------|------|------|------|------|------|------|------|------|------|------|------|------|------|------|------|------|------|------|------|------|------|------|------|------|------|------|------|------|------|------|------|------|------|------|------|------|------|------|------|------|------|------|------|------|------|------|------|------|------|------|------|------|------|------|------|------|------|------|------|------|------|------|------|------|------|------|------|------|------|------|------|------|------|------|------|------|------|------|------|------|------|------|------|------|------|------|------|------|------|------|------|------|------|------|------|------|------|------|------|------|------|------|------|------|------|------|------|------|------|------|------|------|------|------|------|------|------|------|------|------|------|------|------|------|------|------|------|------|------|------|------|------|------|------|------|------|------|------|------|------|------|------|------|------|------|------|------|------|------|------|------|------|------|------|------|------|------|------|------|------|------|------|------|------|------|------|------|------|------|------|------|------|------|------|------|------|------|------|------|------|------|------|------|-----|-----|-----|-----|-----|-----|-----|-----|-----|-----|-----|-----|-----|-----|-----|-----|-----|-----|-----|-----|-----|-----|-----|-----|-----|-----|-----|-----|-----|-----|-----|-----|-----|-----|-----|-----|-----|-----|-----|-----|-----|-----|-----|-----|-----|-----|-----|-----|-----|-----|-----|-----|-----|-----|-----|-----|-----|-----|-----|-----|-----|-----|-----|-----|-----|-----|-----|-----|-----|-----|-----|-----|-----|-----|-----|-----|-----|-----|-----|-----|-----|-----|-----|-----|-----|-----|-----|-----|-----|-----|-----|-----|-----|-----|-----|-----|-----|-----|-----|-----|-----|-----|-----|-----|-----|-----|-----|-----|-----|-----|-----|-----|-----|-----|-----|-----|-----|-----|-----|-----|-----|-----|-----|-----|-----|-----|-----|-----|-----|-----|-----|-----|-----|-----|-----|-----|-----|-----|-----|-----|-----|-----|-----|-----|-----|-----|-----|-----|-----|-----|-----|-----|-----|-----|-----|-----|-----|-----|-----|-----|-----|-----|-----|-----|-----|-----|-----|-----|-----|-----|-----|-----|-----|-----|-----|-----|-----|-----|-----|-----|-----|-----|-----|-----|-----|-----|-----|-----|-----|-----|-----|-----|-----|-----|-----|-----|-----|-----|-----|-----|-----|-----|-----|-----|-----|-----|-----|-----|-----|-----|-----|-----|-----|-----|-----|-----|-----|-----|-----|-----|-----|-----|-----|-----|-----|-----|-----|-----|-----|-----|-----|





























| Q1 | Q2 | Q3 | Q4 | Q5 | Q6 | Q7 | Q8 | Q9 | Q10 | Q11 | Q12 | Q13 | Q14 | Q15 | Q16 | Q17 | Q18 | Q19 | Q20 | Q21 | Q22 | Q23 | Q24 | Q25 | Q26 | Q27 | Q28 | Q29 | Q30 | Q31 | Q32 | Q33 | Q34 | Q35 | Q36 | Q37 | Q38 | Q39 | Q40 | Q41 | Q42 | Q43 | Q44 | Q45 | Q46 | Q47 | Q48 | Q49 | Q50 | Q51 | Q52 | Q53 | Q54 | Q55 | Q56 | Q57 | Q58 | Q59 | Q60 | Q61 | Q62 | Q63 | Q64 | Q65 | Q66 | Q67 | Q68 | Q69 | Q70 | Q71 | Q72 | Q73 | Q74 | Q75 | Q76 | Q77 | Q78 | Q79 | Q80 | Q81 | Q82 | Q83 | Q84 | Q85 | Q86 | Q87 | Q88 | Q89 | Q90 | Q91 | Q92 | Q93 | Q94 | Q95 | Q96 | Q97 | Q98 | Q99 | Q100 |
|----|----|----|----|----|----|----|----|----|-----|-----|-----|-----|-----|-----|-----|-----|-----|-----|-----|-----|-----|-----|-----|-----|-----|-----|-----|-----|-----|-----|-----|-----|-----|-----|-----|-----|-----|-----|-----|-----|-----|-----|-----|-----|-----|-----|-----|-----|-----|-----|-----|-----|-----|-----|-----|-----|-----|-----|-----|-----|-----|-----|-----|-----|-----|-----|-----|-----|-----|-----|-----|-----|-----|-----|-----|-----|-----|-----|-----|-----|-----|-----|-----|-----|-----|-----|-----|-----|-----|-----|-----|-----|-----|-----|-----|-----|-----|-----|------|
| Q1 | Q2 | Q3 | Q4 | Q5 | Q6 | Q7 | Q8 | Q9 | Q10 | Q11 | Q12 | Q13 | Q14 | Q15 | Q16 | Q17 | Q18 | Q19 | Q20 | Q21 | Q22 | Q23 | Q24 | Q25 | Q26 | Q27 | Q28 | Q29 | Q30 | Q31 | Q32 | Q33 | Q34 | Q35 | Q36 | Q37 | Q38 | Q39 | Q40 | Q41 | Q42 | Q43 | Q44 | Q45 | Q46 | Q47 | Q48 | Q49 | Q50 | Q51 | Q52 | Q53 | Q54 | Q55 | Q56 | Q57 | Q58 | Q59 | Q60 | Q61 | Q62 | Q63 | Q64 | Q65 | Q66 | Q67 | Q68 | Q69 | Q70 | Q71 | Q72 | Q73 | Q74 | Q75 | Q76 | Q77 | Q78 | Q79 | Q80 | Q81 | Q82 | Q83 | Q84 | Q85 | Q86 | Q87 | Q88 | Q89 | Q90 | Q91 | Q92 | Q93 | Q94 | Q95 | Q96 | Q97 | Q98 | Q99 | Q100 |







| GO ID | GO ACCESSION           | GO Term                       | p-value | Count in Selection | % Count in Selection | Count in Total | % Count in Total |
|-------|------------------------|-------------------------------|---------|--------------------|----------------------|----------------|------------------|
| 9396  | GO:0016168             | chlorophyll binding           | 0.00    | 12                 | 2.169982             | 46             | 0.13284431       |
| 22409 | GO:0046906             | tetrapyrrole binding          | 0.00    | 33                 | 5.96745              | 596            | 1.7212002        |
| 9266  | GO:0016020             | membrane                      | 0.00    | 93                 | 16.81736             | 3741           | 10.803708        |
| 3872  | GO:0005506             | iron ion binding              | 0.00    | 22                 | 3.9783               | 563            | 1.6258988        |
| 11931 | GO:0020037             | heme binding                  | 0.00    | 21                 | 3.7974684            | 550            | 1.5883559        |
| 3827  | GO:0005372             | water transmembrane transp    | 0.00    | 7                  | 1.2658228            | 81             | 0.23392151       |
| 8652  | GO:0015250             | water channel activity        | 0.00    | 7                  | 1.2658228            | 81             | 0.23392151       |
| 4927  | GO:0006833             | water transport               | 0.00    | 7                  | 1.2658228            | 81             | 0.23392151       |
| 18429 | GO:0042044             | fluid transport               | 0.00    | 7                  | 1.2658228            | 81             | 0.23392151       |
| 2868  | GO:0004062             | aryl sulfotransferase activit | 0.00    | 3                  | 0.5424955            | 15             | 0.043318797      |
| 5702  | GO:0008146             | sulfotransferase activity     | 0.00    | 5                  | 0.9041591            | 54             | 0.15594767       |
| 2986  | GO:0004252             | serine-type endopeptidase     | 0.00    | 8                  | 1.4466546            | 144            | 0.41586044       |
| 13082 | GO:0030599             | peclnesterase activity        | 0.00    | 9                  | 1.6274865            | 178            | 0.5140497        |
| 9832  | GO:0016782             | transferase activity, transfe | 0.01    | 5                  | 0.9041591            | 74             | 0.21370606       |
| 6613  | GO:0009250             | glucan biosynthetic process   | 0.01    | 2                  | 0.36166364           | 8              | 0.023103358      |
| 5766  | GO:0008236             | serine-type peptidase activi  | 0.01    | 9                  | 1.6274865            | 214            | 0.6180149        |
| 10103 | GO:0017171             | serine hydrolase activity     | 0.01    | 9                  | 1.6274865            | 220            | 0.63534236       |
| 4215  | GO:0005975             | carbohydrate metabolic pro    | 0.01    | 26                 | 4.7016273            | 990            | 2.8590407        |
| 11776 | GO:0019825             | oxygen binding                | 0.01    | 13                 | 2.3508136            | 389            | 1.1234008        |
| 6216  | GO:0008810             | cellulase activity            | 0.01    | 3                  | 0.5424955            | 30             | 0.086637594      |
| 11827 | GO:0018988(GO:0030396) | extrinsic to membrane         | 0.01    | 3                  | 0.5424955            | 30             | 0.086637594      |
| 3156  | GO:0004497             | monooxygenase activity        | 0.02    | 7                  | 1.2658228            | 172            | 0.49672222       |
| 16081 | GO:0003692             | cellular polysaccharide bios  | 0.02    | 2                  | 0.36166364           | 15             | 0.043318797      |
| 206   | GO:0000271             | polysaccharide biosynthetic   | 0.03    | 2                  | 0.36166364           | 16             | 0.046206716      |
| 12533 | GO:0022838             | substrate-specific channel    | 0.03    | 8                  | 1.4466546            | 221            | 0.63823026       |
| 9771  | GO:0016709             | oxidoreductase activity, act  | 0.03    | 4                  | 0.7233273            | 71             | 0.2050423        |
| 4909  | GO:0006810(GO:0015457) | transport                     | 0.03    | 49                 | 8.86076              | 2315           | 6.6855345        |
| 25529 | GO:0051234             | establishment of localizatio  | 0.03    | 49                 | 8.86076              | 2315           | 6.6855345        |
| 25476 | GO:0051179             | localization                  | 0.03    | 49                 | 8.86076              | 2319           | 6.697086         |
| 31498 | GO:0080123             | jasmonate-amino synthetas     | 0.03    | 2                  | 0.36166364           | 17             | 0.049094636      |
| 8660  | GO:0015267(GO:0015249) | channel activity              | 0.03    | 8                  | 1.4466546            | 226            | 0.6526699        |
| 12515 | GO:0022803             | passive transmembrane tra     | 0.03    | 8                  | 1.4466546            | 226            | 0.6526699        |
| 3013  | GO:0004328(GO:0034566) | formamidase activity          | 0.03    | 1                  | 0.18083182           | 2              | 0.00577584       |
| 4429  | GO:0006223             | uracil salvage                | 0.03    | 1                  | 0.18083182           | 2              | 0.00577584       |
| 4907  | GO:0006808             | regulation of nitrogen utiliz | 0.03    | 1                  | 0.18083182           | 2              | 0.00577584       |
| 6080  | GO:0008655             | pyrimidine-containing comp    | 0.03    | 1                  | 0.18083182           | 2              | 0.00577584       |
| 6828  | GO:0009540             | zeaxanthin epoxidase [over    | 0.03    | 1                  | 0.18083182           | 2              | 0.00577584       |
| 7504  | GO:0010277(GO:0046407) | chlorophyllide a oxygenase    | 0.03    | 1                  | 0.18083182           | 2              | 0.00577584       |
| 7532  | GO:0010307             | acetylglutamate kinase reg    | 0.03    | 1                  | 0.18083182           | 2              | 0.00577584       |
| 8612  | GO:0015204(GO:0015287) | urea transmembrane transp     | 0.03    | 1                  | 0.18083182           | 2              | 0.00577584       |
| 9106  | GO:0015840             | urea transport                | 0.03    | 1                  | 0.18083182           | 2              | 0.00577584       |
| 9766  | GO:0016703             | oxidoreductase activity, act  | 0.03    | 1                  | 0.18083182           | 2              | 0.00577584       |
| 11797 | GO:0019860             | uracil metabolic process      | 0.03    | 1                  | 0.18083182           | 2              | 0.00577584       |
| 14849 | GO:0032441             | pheophorbide a oxygenase      | 0.03    | 1                  | 0.18083182           | 2              | 0.00577584       |
| 19204 | GO:0042887             | amide transmembrane tran      | 0.03    | 1                  | 0.18083182           | 2              | 0.00577584       |
| 19407 | GO:0043100             | pyrimidine base salvage       | 0.03    | 1                  | 0.18083182           | 2              | 0.00577584       |
| 23921 | GO:0048529             | magnesium-protoporphyrin      | 0.03    | 1                  | 0.18083182           | 2              | 0.00577584       |
| 30280 | GO:0071918             | urea transmembrane transp     | 0.03    | 1                  | 0.18083182           | 2              | 0.00577584       |
| 31514 | GO:0080139             | borate efflux transmembran    | 0.03    | 1                  | 0.18083182           | 2              | 0.00577584       |
| 3723  | GO:0005215(GO:0005478) | transporter activity          | 0.04    | 40                 | 7.233273             | 1844           | 5.325324         |
| 12547 | GO:0022857(GO:0005386) | transmembrane transporter     | 0.04    | 33                 | 5.96745              | 1483           | 4.282785         |
| 3877  | GO:0005516             | calmodulin binding            | 0.04    | 8                  | 1.4466546            | 236            | 0.6815491        |
| 26931 | GO:0055085             | transmembrane transport       | 0.04    | 34                 | 6.148282             | 1548           | 4.4705           |
| 9767  | GO:0016705             | oxidoreductase activity, act  | 0.04    | 10                 | 1.8083183            | 329            | 0.95012563       |
| 9784  | GO:0016723             | oxidoreductase activity, oxi  | 0.04    | 2                  | 0.36166364           | 20             | 0.0577584        |
| 225   | GO:0000293             | ferric-chelate reductase act  | 0.04    | 2                  | 0.36166364           | 20             | 0.0577584        |
| 28930 | GO:0070566             | adenylyltransferase activity  | 0.04    | 3                  | 0.5424955            | 48             | 0.13862015       |
| 7074  | GO:0009815             | 1-aminocyclopropane-1-ca      | 0.04    | 3                  | 0.5424955            | 49             | 0.14150807       |
| 31421 | GO:0080044             | quercetin 7-O-glucosyltrans   | 0.04    | 3                  | 0.5424955            | 49             | 0.14150807       |
| 7166  | GO:0009914             | hormone transport             | 0.05    | 3                  | 0.5424955            | 50             | 0.14439599       |
| 27891 | GO:0060918             | auxin transport               | 0.05    | 3                  | 0.5424955            | 50             | 0.14439599       |
| 31536 | GO:0080161             | auxin transmembrane trans     | 0.05    | 3                  | 0.5424955            | 50             | 0.14439599       |
| 12574 | GO:0022892             | substrate-specific transport  | 0.05    | 32                 | 5.786618             | 1463           | 4.2250266        |
| 3134  | GO:0004474             | malate synthase activity      | 0.05    | 1                  | 0.18083182           | 3              | 0.00866376       |
| 4319  | GO:0006081             | cellular aldehyde metabolic   | 0.05    | 1                  | 0.18083182           | 3              | 0.00866376       |
| 4330  | GO:0006097             | glyoxylate cycle              | 0.05    | 1                  | 0.18083182           | 3              | 0.00866376       |
| 21936 | GO:0046409             | p-coumarate 3-hydroxylase     | 0.05    | 1                  | 0.18083182           | 3              | 0.00866376       |
| 22011 | GO:0046487             | glyoxylate metabolic proces   | 0.05    | 1                  | 0.18083182           | 3              | 0.00866376       |
| 24613 | GO:0050294             | steroid sulfotransferase act  | 0.05    | 1                  | 0.18083182           | 3              | 0.00866376       |
| 4954  | GO:0008689             | lipid transport               | 0.05    | 7                  | 1.2658228            | 208            | 0.6006873        |
| 8085  | GO:0010876             | lipid localization            | 0.05    | 7                  | 1.2658228            | 208            | 0.6006873        |
| 26845 | GO:0052689             | carboxylic ester hydrolase    | 0.05    | 14                 | 2.5316455            | 538            | 1.5537009        |
| 4311  | GO:0006073             | cellular glucan metabolic p   | 0.06    | 2                  | 0.36166364           | 24             | 0.06931008       |
| 20293 | GO:0044042             | glucan metabolic process      | 0.06    | 2                  | 0.36166364           | 24             | 0.06931008       |
| 2969  | GO:004167(GO:0048059)  | dopachrome isomerase act      | 0.06    | 1                  | 0.18083182           | 4              | 0.011551679      |
| 3057  | GO:0004373             | glycogen (starch) synthase    | 0.06    | 1                  | 0.18083182           | 4              | 0.011551679      |
| 3320  | GO:0004697(GO:0004701) | protein kinase C activity     | 0.06    | 1                  | 0.18083182           | 4              | 0.011551679      |
| 3452  | GO:0004845             | uracil phosphoribosyltransf   | 0.06    | 1                  | 0.18083182           | 4              | 0.011551679      |
| 3834  | GO:0005395             | eye pigment precursor tran    | 0.06    | 1                  | 0.18083182           | 4              | 0.011551679      |
| 4218  | GO:0005978             | glycogen biosynthetic proc    | 0.06    | 1                  | 0.18083182           | 4              | 0.011551679      |
| 4413  | GO:0006206             | pyrimidine base metabolic     | 0.06    | 1                  | 0.18083182           | 4              | 0.011551679      |
| 5942  | GO:0008456             | alpha-N-acetylglactosamin     | 0.06    | 1                  | 0.18083182           | 4              | 0.011551679      |
| 7538  | GO:0010313             | phytochrome binding           | 0.06    | 1                  | 0.18083182           | 4              | 0.011551679      |
| 8637  | GO:0015231             | 5-formyltetrahydrofolate tra  | 0.06    | 1                  | 0.18083182           | 4              | 0.011551679      |
| 9147  | GO:0015885             | 5-formyltetrahydrofolate tra  | 0.06    | 1                  | 0.18083182           | 4              | 0.011551679      |
| 9351  | GO:0016119             | carotene metabolic process    | 0.06    | 1                  | 0.18083182           | 4              | 0.011551679      |
| 9352  | GO:0016120             | carotene biosynthetic proc    | 0.06    | 1                  | 0.18083182           | 4              | 0.011551679      |
| 9790  | GO:0016730             | oxidoreductase activity, act  | 0.06    | 1                  | 0.18083182           | 4              | 0.011551679      |
| 9819  | GO:0016767             | geranylgeranyl-diphosphat     | 0.06    | 1                  | 0.18083182           | 4              | 0.011551679      |
| 11857 | GO:0019932             | second-messenger-mediati      | 0.06    | 1                  | 0.18083182           | 4              | 0.011551679      |
| 17811 | GO:0035445             | borate transmembrane tran     | 0.06    | 1                  | 0.18083182           | 4              | 0.011551679      |
| 18575 | GO:0042214             | terpene metabolic process     | 0.06    | 1                  | 0.18083182           | 4              | 0.011551679      |
| 18729 | GO:0042380             | hydroxymethylbutenyl pyro     | 0.06    | 1                  | 0.18083182           | 4              | 0.011551679      |
| 21791 | GO:0046246             | terpene biosynthetic proces   | 0.06    | 1                  | 0.18083182           | 4              | 0.011551679      |
| 22222 | GO:0046713             | borate transport              | 0.06    | 1                  | 0.18083182           | 4              | 0.011551679      |
| 22224 | GO:0046715             | borate transmembrane tran     | 0.06    | 1                  | 0.18083182           | 4              | 0.011551679      |
| 22366 | GO:0046863(GO:0018236) | ribulose-1,5-bisphosphate     | 0.06    | 1                  | 0.18083182           | 4              | 0.011551679      |
| 22408 | GO:0046905             | phytoene synthase activity    | 0.06    | 1                  | 0.18083182           | 4              | 0.011551679      |
| 23493 | GO:0048015             | phosphatidylinositol-medi     | 0.06    | 1                  | 0.18083182           | 4              | 0.011551679      |
| 23495 | GO:0048017             | inositol lipid-mediated sign  | 0.06    | 1                  | 0.18083182           | 4              | 0.011551679      |
| 25055 | GO:0050750             | low-density lipoprotein part  | 0.06    | 1                  | 0.18083182           | 4              | 0.011551679      |
| 28689 | GO:0070325             | lipoprotein particle receptor | 0.06    | 1                  | 0.18083182           | 4              | 0.011551679      |
| 8673  | GO:0015291(GO:0015290) | secondary active transmem     | 0.06    | 11                 | 1.98915              | 407            | 1.1753833        |
| 8028  | GO:0010817             | regulation of hormone level   | 0.07    | 3                  | 0.5424955            | 58             | 0.16749835       |
| 12573 | GO:0022891             | substrate-specific transmem   | 0.07    | 27                 | 4.882459             | 1241           | 3.5839086        |
| 9541  | GO:0016413             | O-acetyltransferase activity  | 0.07    | 2                  | 0.36166364           | 27             | 0.077938335      |
| 25379 | GO:0051082             | unfolded protein binding      | 0.07    | 4                  | 0.7233273            | 98             | 0.28301615       |
| 29175 | GO:0004175(GO:0016809) | endopeptidase activity        | 0.07    | 9                  | 1.6274865            | 329            | 0.9241344        |
| 6840  | GO:0008672             | auxin/hydrogen symporter      | 0.07    | 2                  | 0.36166364           | 28             | 0.080861755      |
| 8863  | GO:0015562             | efflux transmembrane trans    | 0.07    | 2                  | 0.36166364           | 28             | 0.080861755      |
| 11210 | GO:0019207             | kinase regulator activity     | 0.08    | 3                  | 0.5424955            | 62             | 0.17905103       |
| 2962  | GO:0004160             | dihydroxy-acid dehydratase    | 0.08    | 1                  | 0.18083182           | 5              | 0.0144396        |
| 5893  | GO:0008517             | folic acid transporter activi | 0.08    | 1                  | 0.18083182           | 5              | 0.0144396        |
| 9146  | GO:0015884             | folic acid transport          | 0.08    | 1                  | 0.18083182           | 5              | 0.0144396        |
| 2870  | GO:0004064             | arylesterase activity         | 0.08    | 2                  | 0.36166364           | 30             | 0.086637594      |
| 20514 | GO:0044264             | cellular polysaccharide met   | 0.09    | 2                  | 0.36166364           | 31             | 0.08952551       |
| 19253 | GO:0042936             | dipeptide transporter activi  | 0.09    | 4                  | 0.7233273            | 105            | 0.3032316        |
| 19255 | GO:0042938             | dipeptide transport           | 0.09    | 4                  | 0.7233273            | 105            | 0.3032316        |
| 3845  | GO:0005452             | inorganic anion exchanger     | 0.09    | 1                  | 0.18083182           | 6              | 0.01732752       |
| 3940  | GO:0005615             | extracellular space           | 0.09    | 1                  | 0.18083182           | 6              | 0.01732752       |
| 4118  | GO:0005852             | eukaryotic translation initia | 0.09    | 1                  | 0.18083182           | 6              | 0.01732752       |
| 5559  | GO:0007602             | phototransduction             | 0.09    | 1                  | 0.18083182           | 6              | 0.01732752       |
| 5775  | GO:0008251             | tRNA-specific adenosine de    | 0.09    | 1                  | 0.18083182           | 6              | 0.01732752       |



|       |            |                                |      |    |            |      |             |
|-------|------------|--------------------------------|------|----|------------|------|-------------|
| 6868  | GO:0009585 | red, far-red light phototrans  | 0.09 | 1  | 0.18083182 | 6    | 0.01732752  |
| 7135  | GO:0009883 | red or far-red light photore   | 0.09 | 1  | 0.18083182 | 6    | 0.01732752  |
| 7255  | GO:0010017 | red or far-red light signaling | 0.09 | 1  | 0.18083182 | 6    | 0.01732752  |
| 9248  | GO:0015994 | chlorophyll metabolic proces   | 0.09 | 1  | 0.18083182 | 6    | 0.01732752  |
| 9249  | GO:0015995 | chlorophyll biosynthetic pro   | 0.09 | 1  | 0.18083182 | 6    | 0.01732752  |
| 10045 | GO:0017091 | AU-rich element binding        | 0.09 | 1  | 0.18083182 | 6    | 0.01732752  |
| 19203 | GO:0042886 | amide transport                | 0.09 | 1  | 0.18083182 | 6    | 0.01732752  |
| 22188 | GO:0046677 | response to antibiotic         | 0.09 | 1  | 0.18083182 | 6    | 0.01732752  |
| 29853 | GO:0071489 | cellular response to red or f  | 0.09 | 1  | 0.18083182 | 6    | 0.01732752  |
| 5     | GO:0000007 | low-affinity zinc ion transp   | 0.09 | 1  | 0.18083182 | 6    | 0.01732752  |
| 19125 | GO:0042802 | identical protein binding      | 0.10 | 16 | 2.893309   | 697  | 2.01288     |
| 2632  | GO:0003682 | chromatin binding              | 0.10 | 2  | 0.36166364 | 33   | 0.09530135  |
| 9722  | GO:0016641 | oxidoreductase activity, act   | 0.10 | 2  | 0.5424955  | 69   | 0.19926646  |
| 8517  | GO:0015103 | inorganic anion transmembr     | 0.10 | 5  | 0.9041591  | 154  | 0.44473964  |
| 6004  | GO:0009538 | Ran GTPase binding             | 0.10 | 2  | 0.36166364 | 34   | 0.09818927  |
| 3021  | GO:0004337 | geranyltransferase act         | 0.11 | 1  | 0.18083182 | 7    | 0.020215439 |
| 19401 | GO:0043094 | cellular metabolic compoun     | 0.11 | 1  | 0.18083182 | 7    | 0.020215439 |
| 21107 | GO:0045505 | dynein intermediate chain b    | 0.11 | 1  | 0.18083182 | 7    | 0.020215439 |
| 21146 | GO:0045544 | gibberellin 20-oxidase activ   | 0.11 | 2  | 0.36166364 | 35   | 0.10107719  |
| 11202 | GO:0019199 | transmembrane receptor pr      | 0.11 | 12 | 2.169982   | 504  | 1.4555116   |
| 8739  | GO:0015385 | sodium/hydrogen antiporte      | 0.11 | 2  | 0.36166364 | 36   | 0.10396511  |
| 9185  | GO:0015925 | galactosidase activity         | 0.11 | 2  | 0.36166364 | 36   | 0.10396511  |
| 12626 | GO:0030029 | actin filament-based proces    | 0.11 | 2  | 0.36166364 | 36   | 0.10396511  |
| 12633 | GO:0030036 | actin cytoskeleton organiza    | 0.11 | 2  | 0.36166364 | 36   | 0.10396511  |
| 2816  | GO:0004000 | adenosine deaminase activ      | 0.12 | 1  | 0.18083182 | 8    | 0.023103358 |
| 3803  | GO:0005344 | oxygen transporter activity    | 0.12 | 1  | 0.18083182 | 8    | 0.023103358 |
| 4961  | GO:0006879 | cellular iron ion homeostas    | 0.12 | 1  | 0.18083182 | 8    | 0.023103358 |
| 7843  | GO:0010628 | positive regulation of gene    | 0.12 | 1  | 0.18083182 | 8    | 0.023103358 |
| 8940  | GO:0015669 | gas transport                  | 0.12 | 1  | 0.18083182 | 8    | 0.023103358 |
| 8942  | GO:0015671 | oxygen transport               | 0.12 | 1  | 0.18083182 | 8    | 0.023103358 |
| 11196 | GO:0019187 | beta-1,4-mannosyltransfera     | 0.12 | 1  | 0.18083182 | 8    | 0.023103358 |
| 13262 | GO:0030795 | jasmonate O-methyltransfe      | 0.12 | 1  | 0.18083182 | 8    | 0.023103358 |
| 21461 | GO:0045893 | positive regulation of trans   | 0.12 | 1  | 0.18083182 | 8    | 0.023103358 |
| 22702 | GO:0047209 | coniferyl-alcohol glucosyltr   | 0.12 | 1  | 0.18083182 | 8    | 0.023103358 |
| 26035 | GO:0051753 | mannan synthase activity       | 0.12 | 1  | 0.18083182 | 8    | 0.023103358 |
| 26918 | GO:0055072 | iron ion homeostasis           | 0.12 | 1  | 0.18083182 | 8    | 0.023103358 |
| 5066  | GO:0007010 | cytoskeleton organization      | 0.12 | 2  | 0.36166364 | 38   | 0.10974095  |
| 9637  | GO:0016538 | cytoskeleton organization      | 0.12 | 2  | 0.36166364 | 38   | 0.10974095  |
| 22479 | GO:0045983 | protein dimerization activit   | 0.13 | 12 | 2.169982   | 517  | 1.48305545  |
| 3475  | GO:0004871 | signal transducer activity     | 0.13 | 17 | 3.074141   | 787  | 2.2727928   |
| 27063 | GO:0060089 | molecular transducer activi    | 0.13 | 17 | 3.074141   | 787  | 2.2727928   |
| 19126 | GO:0042803 | protein homodimerization a     | 0.13 | 7  | 1.2658228  | 265  | 0.7652988   |
| 2837  | GO:0004028 | 3-chloroalyl aldehyde dehy     | 0.13 | 1  | 0.18083182 | 9    | 0.025991278 |
| 5735  | GO:0008198 | ferrous iron binding           | 0.13 | 1  | 0.18083182 | 9    | 0.025991278 |
| 7225  | GO:0009978 | allene oxide synthase activ    | 0.13 | 1  | 0.18083182 | 9    | 0.025991278 |
| 9769  | GO:0016707 | gibberellin 3-beta-dioxygen    | 0.13 | 1  | 0.18083182 | 9    | 0.025991278 |
| 19342 | GO:0043027 | caspase inhibitor activity     | 0.13 | 1  | 0.18083182 | 9    | 0.025991278 |
| 19343 | GO:0043028 | caspase regulator activity     | 0.13 | 1  | 0.18083182 | 9    | 0.025991278 |
| 19458 | GO:0043154 | negative regulation of casp    | 0.13 | 1  | 0.18083182 | 9    | 0.025991278 |
| 19579 | GO:0043281 | regulation of caspase activ    | 0.13 | 1  | 0.18083182 | 9    | 0.025991278 |
| 21104 | GO:0045502 | dynein binding                 | 0.13 | 1  | 0.18083182 | 9    | 0.025991278 |
| 28365 | GO:0065008 | regulation of biological qua   | 0.14 | 8  | 1.4466546  | 316  | 0.9125827   |
| 17617 | GO:0032521 | UDP-glucosyltransferase ac     | 0.14 | 6  | 1.084991   | 218  | 0.62956655  |
| 18674 | GO:0042325 | regulation of phosphorylati    | 0.14 | 3  | 0.5424955  | 81   | 0.23392151  |
| 22049 | GO:0046527 | glucosyltransferase activity   | 0.14 | 7  | 1.2658228  | 270  | 0.77973837  |
| 5019  | GO:0006952 | defense response               | 0.14 | 6  | 1.084991   | 221  | 0.63823026  |
| 8675  | GO:0015293 | symporter activity             | 0.14 | 5  | 0.9041591  | 173  | 0.49961013  |
| 3203  | GO:0004557 | alpha-galactosidase activit    | 0.15 | 1  | 0.18083182 | 10   | 0.0288792   |
| 6275  | GO:0008878 | glucose-1-phosphate aden       | 0.15 | 1  | 0.18083182 | 10   | 0.0288792   |
| 8679  | GO:0009112 | nucleobase metabolic proc      | 0.15 | 1  | 0.18083182 | 10   | 0.0288792   |
| 9178  | GO:0015248 | sterol transporter activity    | 0.15 | 1  | 0.18083182 | 10   | 0.0288792   |
| 9178  | GO:0015918 | sterol transport               | 0.15 | 1  | 0.18083182 | 10   | 0.0288792   |
| 10072 | GO:0017127 | cholesterol transporter activ  | 0.15 | 1  | 0.18083182 | 10   | 0.0288792   |
| 12859 | GO:0030301 | cholesterol transport          | 0.15 | 1  | 0.18083182 | 10   | 0.0288792   |
| 19443 | GO:0043139 | 5'-3' DNA helicase activit     | 0.15 | 1  | 0.18083182 | 10   | 0.0288792   |
| 19445 | GO:0043141 | ATP-dependent 5'-3' DNA H      | 0.15 | 1  | 0.18083182 | 10   | 0.0288792   |
| 26069 | GO:0051787 | misfolded protein binding      | 0.15 | 1  | 0.18083182 | 10   | 0.0288792   |
| 29578 | GO:0071214 | cellular response to abiotic   | 0.15 | 1  | 0.18083182 | 10   | 0.0288792   |
| 29842 | GO:0071478 | cellular response to radiati   | 0.15 | 1  | 0.18083182 | 10   | 0.0288792   |
| 29846 | GO:0071482 | cellular response to light st  | 0.15 | 1  | 0.18083182 | 10   | 0.0288792   |
| 25095 | GO:0050790 | regulation of catalytic activ  | 0.15 | 11 | 1.98915    | 480  | 1.3862015   |
| 25998 | GO:0051716 | cellular response to stimulu   | 0.15 | 23 | 4.159132   | 1138 | 3.2864528   |
| 9768  | GO:0016706 | oxidoreductase activity, act   | 0.15 | 5  | 0.9041591  | 175  | 0.505386    |
| 25195 | GO:0050896 | response to stimulus           | 0.15 | 36 | 6.509946   | 1881 | 5.432177    |
| 8967  | GO:0015698 | inorganic anion transport      | 0.15 | 5  | 0.9041591  | 176  | 0.5082739   |
| 28378 | GO:0070011 | peptidase activity, acting o   | 0.15 | 12 | 2.169982   | 537  | 1.550813    |
| 11222 | GO:0019220 | regulation of phosphate me     | 0.15 | 3  | 0.5424955  | 85   | 0.24547319  |
| 25471 | GO:0051174 | regulation of phosphorus m     | 0.15 | 3  | 0.5424955  | 85   | 0.24547319  |
| 28366 | GO:0065009 | regulation of molecular fun    | 0.16 | 11 | 1.98915    | 484  | 1.3977532   |
| 3904  | GO:0005576 | extracellular region           | 0.16 | 5  | 0.9041591  | 178  | 0.5140497   |
| 31431 | GO:0080054 | low affinity nitrate transme   | 0.16 | 2  | 0.36166364 | 45   | 0.1299564   |
| 3416  | GO:0004806 | triglyceride lipase activity   | 0.16 | 1  | 0.18083182 | 11   | 0.03176712  |
| 11152 | GO:0019139 | cytokinin dehydrogenase a      | 0.16 | 1  | 0.18083182 | 11   | 0.03176712  |
| 9719  | GO:0016638 | oxidoreductase activity, act   | 0.17 | 3  | 0.5424955  | 89   | 0.25702485  |
| 2843  | GO:0004034 | aldose 1-epimerase activiti    | 0.18 | 1  | 0.18083182 | 12   | 0.03465504  |
| 30449 | GO:0004365 | glycerinaldehyde-3-phosphat    | 0.18 | 1  | 0.18083182 | 12   | 0.03465504  |
| 3396  | GO:0004773 | steryl-sulfatase activity      | 0.18 | 1  | 0.18083182 | 12   | 0.03465504  |
| 4217  | GO:0005977 | glycogen metabolic proces      | 0.18 | 1  | 0.18083182 | 12   | 0.03465504  |
| 4344  | GO:0008112 | energy reserve metabolic p     | 0.18 | 1  | 0.18083182 | 12   | 0.03465504  |
| 5965  | GO:0008484 | sulfuric ester hydrolase act   | 0.18 | 1  | 0.18083182 | 12   | 0.03465504  |
| 6336  | GO:0008943 | glycerinaldehyde-3-phosphat    | 0.18 | 1  | 0.18083182 | 12   | 0.03465504  |
| 6826  | GO:0009538 | photosystem I reaction cen     | 0.18 | 1  | 0.18083182 | 12   | 0.03465504  |
| 6864  | GO:0009581 | detection of external stimul   | 0.18 | 1  | 0.18083182 | 12   | 0.03465504  |
| 6865  | GO:0009582 | detection of abiotic stimulus  | 0.18 | 1  | 0.18083182 | 12   | 0.03465504  |
| 6866  | GO:0009583 | detection of light stimulus    | 0.18 | 1  | 0.18083182 | 12   | 0.03465504  |
| 8748  | GO:0015398 | high affinity secondary acti   | 0.18 | 1  | 0.18083182 | 12   | 0.03465504  |
| 9775  | GO:0016713 | oxidoreductase activity, act   | 0.18 | 1  | 0.18083182 | 12   | 0.03465504  |
| 10743 | GO:0016885 | alkane 1-monooxygenase a       | 0.18 | 1  | 0.18083182 | 12   | 0.03465504  |
| 20615 | GO:0044421 | extracellular region part      | 0.18 | 1  | 0.18083182 | 12   | 0.03465504  |
| 21503 | GO:0045935 | positive regulation of nucle   | 0.18 | 1  | 0.18083182 | 12   | 0.03465504  |
| 25470 | GO:0051173 | positive regulation of nitrog  | 0.18 | 1  | 0.18083182 | 12   | 0.03465504  |
| 25546 | GO:0051254 | positive regulation of RNA     | 0.18 | 1  | 0.18083182 | 12   | 0.03465504  |
| 25890 | GO:0051606 | detection of stimulus          | 0.18 | 1  | 0.18083182 | 12   | 0.03465504  |
| 2976  | GO:0004176 | ATP-dependent peptidase a      | 0.18 | 2  | 0.36166364 | 48   | 0.13862015  |
| 4942  | GO:0006855 | drug transmembrane trans       | 0.18 | 4  | 0.7233273  | 139  | 0.40142086  |
| 8607  | GO:0015197 | peptide transporter activity   | 0.18 | 4  | 0.7233273  | 139  | 0.40142086  |
| 8608  | GO:0015198 | oligopeptide transporter ac    | 0.18 | 4  | 0.7233273  | 139  | 0.40142086  |
| 8642  | GO:0015238 | drug transmembrane trans       | 0.18 | 4  | 0.7233273  | 139  | 0.40142086  |
| 9154  | GO:0015893 | drug transport                 | 0.18 | 4  | 0.7233273  | 139  | 0.40142086  |
| 18832 | GO:0042493 | response to drug               | 0.18 | 4  | 0.7233273  | 139  | 0.40142086  |
| 38444 | GO:0005451 | monovalent cation/hydroge      | 0.18 | 2  | 0.36166364 | 49   | 0.14150807  |
| 8909  | GO:0015630 | microtubule cytoskeleton       | 0.18 | 2  | 0.36166364 | 49   | 0.14150807  |
| 3002  | GO:0004315 | 3-oxoacyl-[acyl-carrier-pro    | 0.19 | 1  | 0.18083182 | 13   | 0.037542958 |
| 7551  | GO:0010327 | acetyl CoA:[Z]-3-hexen-1-o     | 0.19 | 1  | 0.18083182 | 13   | 0.037542958 |
| 8149  | GO:0010941 | regulation of cell death       | 0.19 | 1  | 0.18083182 | 13   | 0.037542958 |
| 13443 | GO:0030984 | kininogen binding              | 0.19 | 1  | 0.18083182 | 13   | 0.037542958 |
| 19298 | GO:0042981 | regulation of apoptosis        | 0.19 | 1  | 0.18083182 | 13   | 0.037542958 |
| 19381 | GO:0043067 | regulation of programmed       | 0.19 | 1  | 0.18083182 | 13   | 0.037542958 |
| 4944  | GO:0006857 | oligopeptide transport         | 0.19 | 4  | 0.7233273  | 141  | 0.40171967  |
| 8676  | GO:0015294 | solute:cation symporter act    | 0.19 | 4  | 0.7233273  | 141  | 0.40171967  |
| 9099  | GO:0015833 | peptide transport              | 0.19 | 4  | 0.7233273  | 141  | 0.40171967  |
| 4216  | GO:0005976 | polysaccharide metabolic p     | 0.19 | 2  | 0.36166364 | 50   | 0.14439599  |
| 9783  | GO:0016722 | oxidoreductase activity, oxi   | 0.19 | 2  | 0.36166364 | 50   | 0.14439599  |
| 9993  | GO:0017016 | Ras GTPase binding             | 0.19 | 2  | 0.36166364 | 50   | 0.14439599  |
| 3476  | GO:0004872 | receptor activity              | 0.19 | 14 | 2.5316455  | 672  | 1.9406822   |
| 28364 | GO:0065007 | biological regulation          | 0.20 | 77 | 13.92405   | 4376 | 12.637537   |
| 5763  | GO:0008233 | peptidase activity             | 0.20 | 12 | 2.169982   | 565  | 1.6316746   |



|       |                       |                               |      |     |            |       |             |
|-------|-----------------------|-------------------------------|------|-----|------------|-------|-------------|
| 12794 | GO:0030234            | enzyme regulator activity     | 0.20 | 9   | 1.6274865  | 403   | 1.1638317   |
| 5981  | GO:0008509            | anion transmembrane transp    | 0.20 | 6   | 1.084991   | 245   | 0.70754033  |
| 5195  | GO:0007165 GO:0023033 | signal transduction           | 0.20 | 19  | 3.4358046  | 961   | 2.775291    |
| 12602 | GO:0023052 GO:0023046 | signaling                     | 0.20 | 19  | 3.4358046  | 961   | 2.775291    |
| 3629  | GO:0005087            | Ran quantl-nucleotide exc     | 0.20 | 1   | 0.18083182 | 14    | 0.040430877 |
| 11238 | GO:0019239            | deaminase activity            | 0.20 | 1   | 0.18083182 | 14    | 0.040430877 |
| 4917  | GO:0006820 GO:0006822 | anion transport               | 0.20 | 6   | 1.084991   | 247   | 0.7133162   |
| 25626 | GO:0051336            | regulation of hydrolase acti  | 0.21 | 5   | 0.9041591  | 196   | 0.5660323   |
| 3490  | GO:0004888 GO:0004928 | transmembrane receptor ad     | 0.21 | 12  | 2.169982   | 571   | 1.6490022   |
| 9600  | GO:0016491            | oxidoreductase activity       | 0.21 | 32  | 5.786618   | 1724  | 4.9787736   |
| 6810  | GO:0009522            | photosystem I                 | 0.21 | 1   | 0.18083182 | 15    | 0.043318797 |
| 9340  | GO:0016108            | tetraterpenoid metabolic pr   | 0.21 | 1   | 0.18083182 | 15    | 0.043318797 |
| 9341  | GO:0016109            | tetraterpenoid biosynthetic   | 0.21 | 1   | 0.18083182 | 15    | 0.043318797 |
| 9348  | GO:0016116            | carotenoid metabolic proces   | 0.21 | 1   | 0.18083182 | 15    | 0.043318797 |
| 9349  | GO:0016117            | carotenoid biosynthetic pro   | 0.21 | 1   | 0.18083182 | 15    | 0.043318797 |
| 10079 | GO:0017134            | fibroblast growth factor bin  | 0.21 | 1   | 0.18083182 | 15    | 0.043318797 |
| 4478  | GO:0006281            | DNA repair                    | 0.22 | 4   | 0.7232273  | 149   | 0.43030006  |
| 5037  | GO:0006974 GO:0034984 | response to DNA damage s      | 0.22 | 4   | 0.7232273  | 149   | 0.43030006  |
| 13687 | GO:0031267            | small GTPase binding          | 0.23 | 2   | 0.36166364 | 56    | 0.16172351  |
| 7133  | GO:0009881            | photoreceptor activity        | 0.23 | 1   | 0.18083182 | 16    | 0.046206716 |
| 7178  | GO:0009927            | histidine phosphotransfer k   | 0.23 | 1   | 0.18083182 | 16    | 0.046206716 |
| 7521  | GO:0010295            | (+)-abscisic acid 8-hydroxy   | 0.23 | 1   | 0.18083182 | 16    | 0.046206716 |
| 9189  | GO:0015929            | hexosaminidase activity       | 0.23 | 1   | 0.18083182 | 16    | 0.046206716 |
| 9386  | GO:0016157            | sucrose synthase activity     | 0.23 | 1   | 0.18083182 | 16    | 0.046206716 |
| 9898  | GO:0016863            | intramolecular oxidoreduct    | 0.23 | 1   | 0.18083182 | 16    | 0.046206716 |
| 18757 | GO:0042409            | caffeoyl-CoA O-methyltran     | 0.23 | 1   | 0.18083182 | 16    | 0.046206716 |
| 30066 | GO:0071702            | organic substance transport   | 0.23 | 11  | 1.98915    | 529   | 1.5277096   |
| 3307  | GO:0004675            | transmembrane receptor pt     | 0.24 | 8   | 1.4466546  | 367   | 1.0598665   |
| 4913  | GO:0006814 GO:0006834 | sodium ion transport          | 0.24 | 2   | 0.36166364 | 58    | 0.16749935  |
| 8499  | GO:0015081 GO:0022816 | sodium ion transmembrane      | 0.24 | 2   | 0.36166364 | 58    | 0.16749935  |
| 11820 | GO:0019887            | protein kinase regulator act  | 0.24 | 2   | 0.36166364 | 58    | 0.16749935  |
| 18086 | GO:0035725            | sodium ion transmembrane      | 0.24 | 2   | 0.36166364 | 58    | 0.16749935  |
| 29800 | GO:0071436            | sodium ion export             | 0.24 | 2   | 0.36166364 | 58    | 0.16749935  |
| 4135  | GO:0005875            | microtubule associated con    | 0.24 | 1   | 0.18083182 | 17    | 0.049094636 |
| 4957  | GO:0006875            | cellular metal ion homeost    | 0.24 | 1   | 0.18083182 | 17    | 0.049094636 |
| 12610 | GO:0030003            | cellular cation homeostasis   | 0.24 | 1   | 0.18083182 | 17    | 0.049094636 |
| 26912 | GO:0055065            | metal ion homeostasis         | 0.24 | 1   | 0.18083182 | 17    | 0.049094636 |
| 26926 | GO:0055080            | cation homeostasis            | 0.24 | 1   | 0.18083182 | 17    | 0.049094636 |
| 2831  | GO:0004022            | alcohol dehydrogenase (NA     | 0.24 | 1   | 0.36166364 | 59    | 0.17038727  |
| 3942  | GO:0005618            | cell wall                     | 0.24 | 3   | 0.5424955  | 107   | 0.30900744  |
| 5704  | GO:0008150 GO:0000004 | biological process            | 0.25 | 383 | 65.64195   | 22215 | 64.155136   |
| 25319 | GO:0051020            | GTPase binding                | 0.25 | 2   | 0.36166364 | 60    | 0.17327519  |
| 2630  | GO:0003680            | AT DNA binding                | 0.25 | 1   | 0.18083182 | 18    | 0.051982556 |
| 3963  | GO:0005643 GO:0005644 | nuclear pore                  | 0.25 | 1   | 0.18083182 | 18    | 0.051982556 |
| 4134  | GO:0005874            | microtubule                   | 0.25 | 1   | 0.18083182 | 18    | 0.051982556 |
| 4225  | GO:0005985            | sucrose metabolic process     | 0.25 | 1   | 0.18083182 | 18    | 0.051982556 |
| 4252  | GO:0006014            | D-ribose metabolic process    | 0.25 | 1   | 0.18083182 | 18    | 0.051982556 |
| 5792  | GO:0008271            | secondary active sulfate tra  | 0.25 | 1   | 0.18083182 | 18    | 0.051982556 |
| 7773  | GO:0010557            | positive regulation of macr   | 0.25 | 1   | 0.18083182 | 18    | 0.051982556 |
| 8662  | GO:0015271            | outward rectifier potassium   | 0.25 | 1   | 0.18083182 | 18    | 0.051982556 |
| 8736  | GO:0015381            | high affinity sulfate transm  | 0.25 | 1   | 0.18083182 | 18    | 0.051982556 |
| 12887 | GO:0030332            | cyclin binding                | 0.25 | 1   | 0.18083182 | 18    | 0.051982556 |
| 22431 | GO:0046930            | pore complex                  | 0.25 | 1   | 0.18083182 | 18    | 0.051982556 |
| 22917 | GO:0047429            | nucleoside-triphosphate dip   | 0.25 | 1   | 0.18083182 | 18    | 0.051982556 |
| 8494  | GO:0015075            | ion transmembrane transp      | 0.25 | 16  | 2.893309   | 827   | 2.3883097   |
| 8526  | GO:0015112            | nitrate transmembrane tran    | 0.25 | 2   | 0.36166364 | 61    | 0.1761631   |
| 8975  | GO:0015706 GO:0006872 | nitrate transport             | 0.25 | 2   | 0.36166364 | 61    | 0.1761631   |
| 25098 | GO:0050794 GO:0051244 | regulation of cellular proces | 0.26 | 69  | 12.477396  | 3987  | 11.54136    |
| 7690  | GO:0010466            | negative regulation of pepti  | 0.26 | 3   | 0.5424955  | 110   | 0.31767118  |
| 12946 | GO:0030414            | peptidase inhibitor activity  | 0.26 | 3   | 0.5424955  | 110   | 0.31767118  |
| 25636 | GO:0051346            | negative regulation of hydr   | 0.26 | 3   | 0.5424955  | 110   | 0.31767118  |
| 5732  | GO:0008194            | UDP-glycosyltransferase ac    | 0.26 | 7   | 1.2658228  | 322   | 0.9299102   |
| 16603 | GO:0034220            | ion transmembrane transp      | 0.26 | 16  | 2.893309   | 833   | 2.4056373   |
| 12868 | GO:0030312            | external encapsulating stru   | 0.26 | 3   | 0.5424955  | 111   | 0.3205591   |
| 12985 | GO:0030488            | tRNA methylation              | 0.26 | 1   | 0.18083182 | 19    | 0.054870475 |
| 26711 | GO:0052547            | regulation of peptidase acti  | 0.27 | 3   | 0.5424955  | 112   | 0.32344702  |
| 28100 | GO:0061134            | peptidase regulator activity  | 0.27 | 3   | 0.5424955  | 112   | 0.32344702  |
| 17016 | GO:0034637            | cellular carbohydrate biosy   | 0.27 | 2   | 0.36166364 | 63    | 0.18193895  |
| 8943  | GO:0015672            | monovalent inorganic catio    | 0.27 | 8   | 1.4466546  | 383   | 1.1060733   |
| 25094 | GO:0050789 GO:0050791 | regulation of biological prod | 0.27 | 74  | 13.381556  | 4315  | 12.461374   |
| 9293  | GO:0016051 GO:0006093 | carbohydrate biosynthetic d   | 0.27 | 2   | 0.36166364 | 64    | 0.18482687  |
| 25820 | GO:0051536            | iron-sulfur cluster binding   | 0.27 | 2   | 0.36166364 | 64    | 0.18482687  |
| 25824 | GO:0051540            | metal cluster binding         | 0.27 | 2   | 0.36166364 | 64    | 0.18482687  |
| 4910  | GO:0006811            | ion transport                 | 0.28 | 18  | 3.254973   | 959   | 2.769515    |
| 3798  | GO:0005337            | nucleoside transmembrane      | 0.28 | 1   | 0.18083182 | 20    | 0.0577584   |
| 3956  | GO:0005635 GO:0005636 | nuclear envelope              | 0.28 | 1   | 0.18083182 | 20    | 0.0577584   |
| 5991  | GO:0008519            | ammonium transmembrane        | 0.28 | 1   | 0.18083182 | 20    | 0.0577584   |
| 8965  | GO:0015696            | ammonium transport            | 0.28 | 1   | 0.18083182 | 20    | 0.0577584   |
| 9122  | GO:0015858            | nucleoside transport          | 0.28 | 1   | 0.18083182 | 20    | 0.0577584   |
| 9856  | GO:0016814            | hydrolase activity, acting o  | 0.28 | 1   | 0.18083182 | 20    | 0.0577584   |
| 25477 | GO:0051180            | vitamin transport             | 0.28 | 1   | 0.18083182 | 20    | 0.0577584   |
| 25480 | GO:0051183            | vitamin transporter activity  | 0.28 | 1   | 0.18083182 | 20    | 0.0577584   |
| 30844 | GO:0072488            | ammonium transmembrane        | 0.28 | 1   | 0.18083182 | 20    | 0.0577584   |
| 9811  | GO:0016757 GO:0016932 | transferase activity, transfe | 0.28 | 14  | 2.5316455  | 729   | 2.1052935   |
| 9812  | GO:0016758            | transferase activity, transfe | 0.28 | 10  | 1.8083183  | 501   | 1.4468478   |
| 3129  | GO:0004487            | long-chain fatty acid-CoA li  | 0.29 | 1   | 0.18083182 | 21    | 0.060646318 |
| 3364  | GO:0004745            | retinol dehydrogenase acti    | 0.29 | 1   | 0.18083182 | 21    | 0.060646318 |
| 3474  | GO:0004969 GO:0004870 | cysteine-type endopeptidas    | 0.29 | 1   | 0.18083182 | 21    | 0.060646318 |
| 4955  | GO:0006873            | cellular ion homeostasis      | 0.29 | 1   | 0.18083182 | 21    | 0.060646318 |
| 12999 | GO:0030506            | ankyrin binding               | 0.29 | 1   | 0.18083182 | 21    | 0.060646318 |
| 25104 | GO:0050801            | ion homeostasis               | 0.29 | 1   | 0.18083182 | 21    | 0.060646318 |
| 26928 | GO:0055082            | cellular chemical homeosta    | 0.29 | 1   | 0.18083182 | 21    | 0.060646318 |
| 24966 | GO:0050660            | flavin adenine dinucleotide   | 0.29 | 3   | 0.5424955  | 118   | 0.34077454  |
| 2662  | GO:0003746 GO:0008182 | translation elongation facto  | 0.30 | 1   | 0.18083182 | 22    | 0.06353424  |
| 3831  | GO:0005385            | zinc ion transmembrane tra    | 0.30 | 1   | 0.18083182 | 22    | 0.06353424  |
| 4574  | GO:0006414 GO:0006442 | translational elongation      | 0.30 | 1   | 0.18083182 | 22    | 0.06353424  |
| 4882  | GO:0006778            | porphyrin metabolic proces    | 0.30 | 1   | 0.18083182 | 22    | 0.06353424  |
| 4883  | GO:0006779            | porphyrin biosynthetic proc   | 0.30 | 1   | 0.18083182 | 22    | 0.06353424  |
| 4924  | GO:0006829            | zinc ion transport            | 0.30 | 1   | 0.18083182 | 22    | 0.06353424  |
| 7143  | GO:0008991            | positive regulation of biosy  | 0.30 | 1   | 0.18083182 | 22    | 0.06353424  |
| 13758 | GO:0031328            | positive regulation of cellu  | 0.30 | 1   | 0.18083182 | 22    | 0.06353424  |
| 18524 | GO:0042162            | telomeric DNA binding         | 0.30 | 1   | 0.18083182 | 22    | 0.06353424  |
| 21152 | GO:0045551            | cinnamyl-alcohol dehydrog     | 0.30 | 1   | 0.18083182 | 22    | 0.06353424  |
| 29941 | GO:0071577            | zinc ion transmembrane tra    | 0.30 | 1   | 0.18083182 | 22    | 0.06353424  |
| 15949 | GO:0033554            | cellular response to stress   | 0.30 | 4   | 0.7232273  | 173   | 0.49961013  |
| 21710 | GO:0046148            | pigment biosynthetic proces   | 0.30 | 2   | 0.36166364 | 69    | 0.19926646  |
| 15524 | GO:0033124            | regulation of GTP catabolic   | 0.31 | 2   | 0.36166364 | 70    | 0.20215438  |
| 19394 | GO:0043087            | regulation of GTPase binding  | 0.31 | 2   | 0.36166364 | 70    | 0.20215438  |
| 2633  | GO:0003694            | damaged DNA binding           | 0.31 | 1   | 0.18083182 | 23    | 0.06942216  |
| 7527  | GO:0010304            | 2-oxoglutarate-dependent d    | 0.31 | 1   | 0.18083182 | 23    | 0.06942216  |
| 22414 | GO:0048912            | transferase activity, transfe | 0.31 | 1   | 0.18083182 | 23    | 0.06942216  |
| 9845  | GO:0018798            | hydrolase activity, acting o  | 0.31 | 8   | 1.4466546  | 401   | 1.1580559   |
| 28959 | GO:0055114            | oxidation-reduction process   | 0.32 | 43  | 7.775688   | 2490  | 7.1909204   |
| 11695 | GO:0019725            | cellular homeostasis          | 0.32 | 5   | 0.9041591  | 234   | 0.67577326  |
| 8559  | GO:0015146            | pentose transmembrane tra     | 0.32 | 1   | 0.18083182 | 24    | 0.06931008  |
| 8561  | GO:0015148            | D-xylose transmembrane tr     | 0.32 | 1   | 0.18083182 | 24    | 0.06931008  |
| 8829  | GO:0015519            | D-xylose:hydrogen symport     | 0.32 | 1   | 0.18083182 | 24    | 0.06931008  |
| 9019  | GO:0015750            | pentose transport             | 0.32 | 1   | 0.18083182 | 24    | 0.06931008  |
| 9022  | GO:0015753            | D-xylose transport            | 0.32 | 1   | 0.18083182 | 24    | 0.06931008  |
| 4916  | GO:0006818            | hydrogen transport            | 0.32 | 6   | 1.084991   | 292   | 0.84327257  |
| 9246  | GO:0015992            | proton transport              | 0.32 | 6   | 1.084991   | 292   | 0.84327257  |
| 9703  | GO:0016620            | oxidoreductase activity, act  | 0.33 | 2   | 0.36166364 | 73    | 0.21081814  |
| 18786 | GO:0042440            | pigment metabolic process     | 0.33 | 2   | 0.36166364 | 73    | 0.21081814  |
| 3884  | GO:0005524            | ATP binding                   | 0.33 | 10  | 1.8083183  | 524   | 1.51327     |
| 11828 | GO:0019899            | enzyme binding                | 0.33 | 5   | 0.9041591  | 237   | 0.684437    |
| 9817  | GO:0016763            | transferase activity, transfe | 0.33 | 2   | 0.36166364 | 74    | 0.21370606  |
| 973   | GO:0001653            | peptide receptor activity     | 0.33 | 1   | 0.18083182 | 25    | 0.07219796  |



|       |                        |                                                                                       |      |    |            |      |             |
|-------|------------------------|---------------------------------------------------------------------------------------|------|----|------------|------|-------------|
| 9876  | GO:0016837             | carbon-oxygen lyase activity                                                          | 0.33 | 1  | 0.18083182 | 25   | 0.072197996 |
| 13054 | GO:0030570             | pectate lyase activity                                                                | 0.33 | 1  | 0.18083182 | 25   | 0.072197996 |
| 24256 | GO:0048878             | chemical homeostasis                                                                  | 0.33 | 1  | 0.18083182 | 25   | 0.072197996 |
| 31493 | GO:0080118             | brassinosteroid sulfotransferase activity                                             | 0.33 | 1  | 0.18083182 | 25   | 0.072197996 |
| 18925 | GO:0042592             | homeostatic process                                                                   | 0.33 | 5  | 0.9041591  | 238  | 0.68732494  |
| 8810  | GO:0015491             | cation:cation antiporter activity                                                     | 0.34 | 2  | 0.36166364 | 75   | 0.21659398  |
| 3210  | GO:0004565             | beta-galactosidase activity                                                           | 0.34 | 1  | 0.18083182 | 26   | 0.075085916 |
| 5978  | GO:0008506             | sucrose:hydrogen symporter activity                                                   | 0.34 | 1  | 0.18083182 | 26   | 0.075085916 |
| 5987  | GO:0008515(GO:0019188) | sucrose transmembrane transporter activity                                            | 0.34 | 1  | 0.18083182 | 26   | 0.075085916 |
| 6907  | GO:0009639             | response to red or far red light                                                      | 0.34 | 1  | 0.18083182 | 26   | 0.075085916 |
| 7000  | GO:0009734             | auxin mediated signaling pathway                                                      | 0.34 | 1  | 0.18083182 | 26   | 0.075085916 |
| 7540  | GO:0010315             | auxin efflux                                                                          | 0.34 | 1  | 0.18083182 | 26   | 0.075085916 |
| 7553  | GO:0010329             | auxin efflux transmembrane transporter activity                                       | 0.34 | 1  | 0.18083182 | 26   | 0.075085916 |
| 8516  | GO:0015101             | organic cation transmembrane transporter activity                                     | 0.34 | 1  | 0.18083182 | 26   | 0.075085916 |
| 8530  | GO:0015116             | sulfate transmembrane transporter activity                                            | 0.34 | 1  | 0.18083182 | 26   | 0.075085916 |
| 8567  | GO:0015154             | disaccharide transmembrane transporter activity                                       | 0.34 | 1  | 0.18083182 | 26   | 0.075085916 |
| 8964  | GO:0015695             | organic cation transport                                                              | 0.34 | 1  | 0.18083182 | 26   | 0.075085916 |
| 9035  | GO:0015766             | disaccharide transport                                                                | 0.34 | 1  | 0.18083182 | 26   | 0.075085916 |
| 9039  | GO:0015770             | sucrose transport                                                                     | 0.34 | 1  | 0.18083182 | 26   | 0.075085916 |
| 9744  | GO:0016671             | oxidoreductase activity, acting on NADPH and reduced flavin mononucleotide, oxidizing | 0.34 | 1  | 0.18083182 | 26   | 0.075085916 |
| 29729 | GO:0071365             | cellular response to auxin stimulus                                                   | 0.34 | 1  | 0.18083182 | 26   | 0.075085916 |
| 126   | GO:0000160             | two-component signal transduction pathway                                             | 0.34 | 1  | 0.18083182 | 26   | 0.075085916 |
| 18000 | GO:0035639             | purine ribonucleoside triphosphate biosynthetic process                               | 0.35 | 14 | 2.5316455  | 769  | 2.2208104   |
| 4562  | GO:0006400(GO:0016549) | tRNA modification                                                                     | 0.35 | 1  | 0.18083182 | 27   | 0.077973835 |
| 8919  | GO:0015645             | fatty acid ligase activity                                                            | 0.35 | 1  | 0.18083182 | 27   | 0.077973835 |
| 9346  | GO:0016114             | terpenoid biosynthetic process                                                        | 0.35 | 1  | 0.18083182 | 27   | 0.077973835 |
| 25481 | GO:0051184             | cofactor transporter activity                                                         | 0.35 | 1  | 0.18083182 | 27   | 0.077973835 |
| 19393 | GO:0043086             | negative regulation of catalytic activity                                             | 0.35 | 4  | 0.7233273  | 188  | 0.54292893  |
| 20342 | GO:0044092             | negative regulation of molecular function                                             | 0.35 | 4  | 0.7233273  | 188  | 0.54292893  |
| 5840  | GO:0008324             | cation transmembrane transporter activity                                             | 0.36 | 10 | 1.8083183  | 538  | 1.5537009   |
| 2833  | GO:0004024             | alcohol dehydrogenase activity                                                        | 0.36 | 1  | 0.18083182 | 28   | 0.080861755 |
| 5793  | GO:0008272(GO:0006870) | sulfate transport                                                                     | 0.36 | 1  | 0.18083182 | 28   | 0.080861755 |
| 6079  | GO:0008654             | phospholipid biosynthetic process                                                     | 0.36 | 1  | 0.18083182 | 28   | 0.080861755 |
| 6809  | GO:0009521(GO:0030090) | photosystem                                                                           | 0.36 | 1  | 0.18083182 | 28   | 0.080861755 |
| 7145  | GO:0009893             | positive regulation of metabolic process                                              | 0.36 | 1  | 0.18083182 | 28   | 0.080861755 |
| 7819  | GO:0010604             | positive regulation of macromolecule biosynthetic process                             | 0.36 | 1  | 0.18083182 | 28   | 0.080861755 |
| 9238  | GO:0015980             | energy derivation by oxidation-reduction                                              | 0.36 | 1  | 0.18083182 | 28   | 0.080861755 |
| 13634 | GO:0031177             | phosphopantetheine binding                                                            | 0.36 | 1  | 0.18083182 | 28   | 0.080861755 |
| 13755 | GO:0031325             | positive regulation of cellular process                                               | 0.36 | 1  | 0.18083182 | 28   | 0.080861755 |
| 20512 | GO:0044262(GO:0006092) | cellular carbohydrate metabolic process                                               | 0.36 | 5  | 0.9041591  | 248  | 0.7162041   |
| 4358  | GO:0006140             | regulation of nucleotide metabolic process                                            | 0.37 | 2  | 0.36166364 | 80   | 0.2310336   |
| 7146  | GO:0009894             | regulation of catabolic process                                                       | 0.37 | 2  | 0.36166364 | 80   | 0.2310336   |
| 9875  | GO:0016836             | hydro-lyase activity                                                                  | 0.37 | 2  | 0.36166364 | 80   | 0.2310336   |
| 13278 | GO:0030811             | regulation of nucleotide catabolic process                                            | 0.37 | 2  | 0.36166364 | 80   | 0.2310336   |
| 13759 | GO:0031329             | regulation of cellular catabolic process                                              | 0.37 | 2  | 0.36166364 | 80   | 0.2310336   |
| 15521 | GO:0033121             | regulation of purine nucleotide metabolic process                                     | 0.37 | 2  | 0.36166364 | 80   | 0.2310336   |
| 4911  | GO:0006812(GO:0006819) | cation transport                                                                      | 0.37 | 12 | 2.169982   | 662  | 1.9118029   |
| 4841  | GO:0006721             | terpenoid metabolic process                                                           | 0.37 | 1  | 0.18083182 | 29   | 0.083749674 |
| 4641  | GO:0006508             | proteolysis                                                                           | 0.37 | 17 | 3.074141   | 965  | 2.7868426   |
| 9869  | GO:0016829             | lyase activity                                                                        | 0.38 | 9  | 1.6274865  | 488  | 1.4093049   |
| 12516 | GO:0022804             | active transmembrane transporter activity                                             | 0.38 | 14 | 2.5316455  | 787  | 2.2727928   |
| 3200  | GO:0004553(GO:0016800) | hydrolase activity, hydrolyzing NAD+ ADP-ribosyltransferase activity                  | 0.38 | 6  | 1.084991   | 312  | 0.90103096  |
| 2774  | GO:0003950             | NAD+ ADP-ribosyltransferase activity                                                  | 0.38 | 1  | 0.18083182 | 30   | 0.086637594 |
| 8683  | GO:0015301(GO:0015380) | anion:anion antiporter activity                                                       | 0.38 | 1  | 0.18083182 | 30   | 0.086637594 |
| 15414 | GO:0033013             | tetrapyrrole metabolic process                                                        | 0.38 | 1  | 0.18083182 | 30   | 0.086637594 |
| 15415 | GO:0033014             | tetrapyrrole biosynthetic process                                                     | 0.38 | 1  | 0.18083182 | 30   | 0.086637594 |
| 23    | GO:0000030             | mannosyltransferase activity                                                          | 0.38 | 1  | 0.18083182 | 30   | 0.086637594 |
| 3787  | GO:0005319             | lipid transporter activity                                                            | 0.38 | 2  | 0.36166364 | 83   | 0.23969735  |
| 16738 | GO:0034357             | photosynthetic membrane                                                               | 0.38 | 2  | 0.36166364 | 83   | 0.23969735  |
| 13041 | GO:0030554             | adenyl nucleotide binding                                                             | 0.38 | 10 | 1.8083183  | 550  | 1.5883559   |
| 14965 | GO:0032559             | adenyl ribonucleotide binding                                                         | 0.38 | 10 | 1.8083183  | 550  | 1.5883559   |
| 50118 | GO:0006590             | response to stress                                                                    | 0.38 | 11 | 1.38515    | 611  | 1.764519    |
| 4912  | GO:0006813(GO:0015458) | potassium ion transport                                                               | 0.39 | 2  | 0.36166364 | 84   | 0.24258527  |
| 30168 | GO:0071804             | cellular potassium ion transport                                                      | 0.39 | 2  | 0.36166364 | 84   | 0.24258527  |
| 30169 | GO:0071805             | potassium ion transmembrane transport                                                 | 0.39 | 2  | 0.36166364 | 84   | 0.24258527  |
| 12608 | GO:0030001             | metal ion transport                                                                   | 0.39 | 7  | 1.2658228  | 374  | 1.080082    |
| 14959 | GO:0032553             | ribonucleotide binding                                                                | 0.39 | 14 | 2.5316455  | 795  | 2.2958963   |
| 14961 | GO:0032555             | purine ribonucleotide binding                                                         | 0.39 | 14 | 2.5316455  | 795  | 2.2958963   |
| 14422 | GO:0032012             | regulation of ARF protein signaling pathway                                           | 0.39 | 1  | 0.18083182 | 31   | 0.08952551  |
| 14720 | GO:0032312             | regulation of ARF GTPase activity                                                     | 0.39 | 1  | 0.18083182 | 31   | 0.08952551  |
| 25478 | GO:0051181             | cofactor transport                                                                    | 0.39 | 1  | 0.18083182 | 31   | 0.08952551  |
| 5624  | GO:0008047             | enzyme activator activity                                                             | 0.39 | 2  | 0.36166364 | 85   | 0.24547319  |
| 10033 | GO:0017076             | purine nucleotide binding                                                             | 0.40 | 14 | 2.5316455  | 797  | 2.3016722   |
| 3717  | GO:0005199             | structural constituent of cell                                                        | 0.40 | 1  | 0.18083182 | 32   | 0.09241343  |
| 3785  | GO:0005315(GO:0005317) | inorganic phosphate transport                                                         | 0.40 | 1  | 0.18083182 | 32   | 0.09241343  |
| 6942  | GO:0009674             | potassium:sodium symporter activity                                                   | 0.40 | 1  | 0.18083182 | 32   | 0.09241343  |
| 9041  | GO:0015772             | oligosaccharide transport                                                             | 0.40 | 1  | 0.18083182 | 32   | 0.09241343  |
| 12522 | GO:0022820             | potassium ion symporter activity                                                      | 0.40 | 1  | 0.18083182 | 32   | 0.09241343  |
| 23914 | GO:0048522(GO:0051242) | positive regulation of cellular process                                               | 0.40 | 1  | 0.18083182 | 32   | 0.09241343  |
| 20624 | GO:0044430             | cytoskeletal part                                                                     | 0.41 | 2  | 0.36166364 | 88   | 0.25413695  |
| 119   | GO:0000151             | ubiquitin ligase complex                                                              | 0.41 | 2  | 0.36166364 | 88   | 0.25413695  |
| 4493  | GO:0006298(GO:0006300) | mismatch repair                                                                       | 0.41 | 1  | 0.18083182 | 33   | 0.09530135  |
| 3749  | GO:0005249             | voltage-gated potassium channel activity                                              | 0.42 | 1  | 0.18083182 | 34   | 0.09818927  |
| 11831 | GO:0019902             | phosphatase binding                                                                   | 0.42 | 1  | 0.18083182 | 34   | 0.09818927  |
| 11832 | GO:0019903             | protein phosphatase binding                                                           | 0.42 | 1  | 0.18083182 | 34   | 0.09818927  |
| 9829  | GO:0016779             | nucleosyltransferase activity                                                         | 0.42 | 3  | 0.5424955  | 148  | 0.42741212  |
| 20630 | GO:0044436             | thylakoid part                                                                        | 0.42 | 2  | 0.36166364 | 90   | 0.2599128   |
| 18582 | GO:0042221             | response to chemical stimulus                                                         | 0.43 | 6  | 1.084991   | 328  | 0.84723777  |
| 16785 | GO:0034404             | nucleobase, nucleoside and nucleotide metabolic process                               | 0.43 | 2  | 0.36166364 | 92   | 0.26588863  |
| 17033 | GO:0034654             | nucleobase, nucleoside, nucleotide metabolic process                                  | 0.43 | 2  | 0.36166364 | 92   | 0.26588863  |
| 21058 | GO:0045454(GO:0030503) | cell redox homeostasis                                                                | 0.44 | 4  | 0.7233273  | 211  | 0.6093511   |
| 8679  | GO:0015297             | antiporter activity                                                                   | 0.44 | 3  | 0.5424955  | 152  | 0.4389638   |
| 8682  | GO:0015300             | solute:solute antiporter activity                                                     | 0.44 | 3  | 0.5424955  | 152  | 0.4389638   |
| 11314 | GO:0019321             | pentose metabolic process                                                             | 0.44 | 1  | 0.18083182 | 36   | 0.10396511  |
| 22376 | GO:0046873             | metal ion transmembrane transport                                                     | 0.44 | 4  | 0.7233273  | 213  | 0.6151269   |
| 3808  | GO:0005351(GO:0005403) | suaar:hydrogen symporter activity                                                     | 0.44 | 2  | 0.36166364 | 94   | 0.27146447  |
| 3835  | GO:0005402             | cation:sugar symporter activity                                                       | 0.44 | 2  | 0.36166364 | 94   | 0.27146447  |
| 6863  | GO:0009579             | thylakoid                                                                             | 0.44 | 2  | 0.36166364 | 94   | 0.27146447  |
| 13656 | GO:0031224             | intrinsic to membrane                                                                 | 0.44 | 20 | 3.6166365  | 1193 | 3.4452884   |
| 15436 | GO:0030306             | macromolecule localization                                                            | 0.45 | 7  | 1.2658228  | 397  | 1.1465042   |
| 3758  | GO:0005267             | potassium channel activity                                                            | 0.45 | 1  | 0.18083182 | 37   | 0.10685303  |
| 3472  | GO:0004866             | endopeptidase inhibitor activity                                                      | 0.45 | 2  | 0.36166364 | 95   | 0.27435237  |
| 8159  | GO:0010951             | negative regulation of endopeptidase activity                                         | 0.45 | 2  | 0.36166364 | 95   | 0.27435237  |
| 26712 | GO:0052548             | regulation of endopeptidase activity                                                  | 0.45 | 2  | 0.36166364 | 95   | 0.27435237  |
| 28101 | GO:0061135             | endopeptidase regulator activity                                                      | 0.45 | 2  | 0.36166364 | 95   | 0.27435237  |
| 12538 | GO:0022843             | voltage-gated cation channel activity                                                 | 0.46 | 1  | 0.18083182 | 38   | 0.10974095  |
| 3464  | GO:0004857             | enzyme inhibitor activity                                                             | 0.46 | 3  | 0.5424955  | 157  | 0.4534034   |
| 8677  | GO:0015295             | solute:hydrogen symporter activity                                                    | 0.47 | 2  | 0.36166364 | 96   | 0.28301615  |
| 8681  | GO:0015299             | solute:hydrogen antiporter activity                                                   | 0.47 | 2  | 0.36166364 | 96   | 0.28301615  |
| 30883 | GO:0072527             | pyrimidine-containing compound biosynthetic process                                   | 0.47 | 1  | 0.18083182 | 39   | 0.11262887  |
| 868   | GO:0001510             | RNA methylation                                                                       | 0.47 | 1  | 0.18083182 | 39   | 0.11262887  |
| 19831 | GO:0043565             | sequence-specific DNA binding                                                         | 0.47 | 3  | 0.5424955  | 159  | 0.45917925  |
| 4755  | GO:0006629             | lipid metabolic process                                                               | 0.47 | 10 | 1.8083183  | 590  | 1.7038727   |
| 6882  | GO:0009605             | response to external stimulus                                                         | 0.47 | 1  | 0.18083182 | 40   | 0.1155168   |
| 7021  | GO:0009755             | hormone-mediated signaling pathway                                                    | 0.47 | 1  | 0.18083182 | 40   | 0.1155168   |
| 15271 | GO:0032870             | cellular response to hormone stimulus                                                 | 0.47 | 1  | 0.18083182 | 40   | 0.1155168   |
| 23910 | GO:0048518(GO:0043119) | positive regulation of biological process                                             | 0.47 | 1  | 0.18083182 | 40   | 0.1155168   |
| 16430 | GO:0034046             | poly(G) RNA binding                                                                   | 0.48 | 2  | 0.36166364 | 100  | 0.28879198  |
| 14667 | GO:0032259             | methylation                                                                           | 0.48 | 5  | 0.9041591  | 285  | 0.8230572   |
| 3638  | GO:0005096             | GTPase activator activity                                                             | 0.48 | 1  | 0.18083182 | 41   | 0.118404716 |
| 19813 | GO:0043547             | positive regulation of GTPase activity                                                | 0.48 | 1  | 0.18083182 | 41   | 0.118404716 |
| 5874  | GO:0008374             | O-acyltransferase activity                                                            | 0.49 | 2  | 0.36166364 | 102  | 0.29456782  |
| 9837  | GO:0016788             | hydrolase activity, acting on ester bonds                                             | 0.49 | 25 | 4.520796   | 1534 | 4.430069    |
| 8461  | GO:0015020(GO:0003981) | glucuronosyltransferase activity                                                      | 0.49 | 1  | 0.18083182 | 42   | 0.121292636 |
| 13884 | GO:0031461             | cullin-RING ubiquitin ligase complex                                                  | 0.49 | 1  | 0.18083182 | 42   | 0.121292636 |
| 9267  | GO:0016021             | integral to membrane                                                                  | 0.50 | 18 | 3.254973   | 1103 | 3.1853757   |
| 19392 | GO:0043085             | positive regulation of catalytic activity                                             | 0.50 | 2  | 0.36166364 | 104  | 0.30034366  |



|       |                       |                               |      |     |            |       |            |
|-------|-----------------------|-------------------------------|------|-----|------------|-------|------------|
| 20343 | GO:0044093            | positive regulation of mole   | 0.50 | 2   | 0.36166364 | 104   | 0.30034366 |
| 13531 | GO:0031072            | heat shock protein binding    | 0.50 | 4   | 0.7232273  | 230   | 0.6642216  |
| 11224 | GO:0019222            | regulation of metabolic pro   | 0.51 | 50  | 9.041592   | 3115  | 8.995871   |
| 9753  | GO:0016682            | oxidoreductase activity, act  | 0.51 | 1   | 0.18083182 | 44    | 0.12706847 |
| 29859 | GO:0071495            | cellular response to endoge   | 0.51 | 1   | 0.18083182 | 44    | 0.12706847 |
| 3630  | GO:0005088            | Ras guanyl-nucleotide exct    | 0.52 | 1   | 0.18083182 | 45    | 0.1299564  |
| 5692  | GO:0008134            | transcription factor binding  | 0.52 | 1   | 0.18083182 | 45    | 0.1299564  |
| 9893  | GO:0016857            | racemase and epimerase a      | 0.52 | 1   | 0.18083182 | 45    | 0.1299564  |
| 14726 | GO:0032318            | regulation of Ras GTPase a    | 0.52 | 1   | 0.18083182 | 45    | 0.1299564  |
| 22096 | GO:0046578            | regulation of Ras protein si  | 0.52 | 1   | 0.18083182 | 45    | 0.1299564  |
| 25355 | GO:0051056            | regulation of small GTPase    | 0.52 | 1   | 0.18083182 | 45    | 0.1299564  |
| 2636  | GO:0003690            | double-stranded DNA bindi     | 0.52 | 1   | 0.18083182 | 46    | 0.13284431 |
| 6999  | GO:0009733            | response to auxin stimulus    | 0.52 | 1   | 0.18083182 | 46    | 0.13284431 |
| 9795  | GO:0016740            | transferase activity          | 0.53 | 60  | 10.84991   | 3764  | 10.870131  |
| 8497  | GO:0015079 GO:0022817 | potassium ion transmembr      | 0.53 | 1   | 0.18083182 | 47    | 0.13572223 |
| 8680  | GO:0015298            | solute:cation antiporter acti | 0.54 | 2   | 0.36166364 | 112   | 0.32344702 |
| 29081 | GO:0070717            | poly-purine tract binding     | 0.54 | 2   | 0.36166364 | 112   | 0.32344702 |
| 13753 | GO:0031323            | regulation of cellular metab  | 0.54 | 44  | 7.9566     | 2770  | 7.995538   |
| 9933  | GO:0016903            | oxidoreductase activity, act  | 0.54 | 2   | 0.36166364 | 113   | 0.32633495 |
| 9800  | GO:0016746            | transferase activity, transfe | 0.54 | 8   | 1.4466546  | 498   | 1.438184   |
| 3756  | GO:0005261 GO:0015281 | cation channel activity       | 0.55 | 1   | 0.18083182 | 49    | 0.14150807 |
| 9725  | GO:0016645            | oxidoreductase activity, act  | 0.55 | 1   | 0.18083182 | 49    | 0.14150807 |
| 11784 | GO:0019838            | growth factor binding         | 0.55 | 1   | 0.18083182 | 49    | 0.14150807 |
| 6166  | GO:0008757            | S-adenosylmethionine-dep      | 0.55 | 3   | 0.5424955  | 180   | 0.5198256  |
| 9535  | GO:0016407            | acetyltransferase activity    | 0.55 | 2   | 0.36166364 | 115   | 0.3321108  |
| 3885  | GO:0005625            | GTP binding                   | 0.55 | 4   | 0.7232273  | 245   | 0.70754033 |
| 11032 | GO:0019001            | guanyl nucleotide binding     | 0.55 | 4   | 0.7232273  | 245   | 0.70754033 |
| 14967 | GO:0032561            | guanyl ribonucleotide bindi   | 0.55 | 4   | 0.7232273  | 245   | 0.70754033 |
| 29674 | GO:0071310            | cellular response to organic  | 0.55 | 1   | 0.18083182 | 50    | 0.14439599 |
| 3903  | GO:0005575 GO:0008372 | cellular_component            | 0.56 | 135 | 24.412296  | 8515  | 24.590637  |
| 20619 | GO:0044425            | membrane part                 | 0.56 | 24  | 4.339964   | 1523  | 4.398302   |
| 3293  | GO:0004659            | prenyltransferase activity    | 0.56 | 1   | 0.18083182 | 51    | 0.14728391 |
| 7213  | GO:0009966 GO:0035466 | regulation of signal transdu  | 0.56 | 1   | 0.18083182 | 51    | 0.14728391 |
| 12601 | GO:0023051            | regulation of signaling       | 0.56 | 1   | 0.18083182 | 51    | 0.14728391 |
| 25416 | GO:0051119            | sugar transmembrane trans     | 0.56 | 2   | 0.36166364 | 118   | 0.34077454 |
| 4915  | GO:0006817            | phosphate transport           | 0.57 | 1   | 0.18083182 | 52    | 0.15017183 |
| 8528  | GO:0015114            | phosphate transmembrane       | 0.57 | 1   | 0.18083182 | 52    | 0.15017183 |
| 1791  | GO:0035435            | phosphate transmembrane       | 0.57 | 1   | 0.18083182 | 52    | 0.15017183 |
| 9818  | GO:0016765 GO:0016766 | transferase activity, transfe | 0.57 | 3   | 0.5424955  | 185   | 0.53426516 |
| 12805 | GO:0030246            | carbohydrate binding          | 0.57 | 4   | 0.7232273  | 251   | 0.7248679  |
| 3946  | GO:0005623            | cell                          | 0.57 | 130 | 23.508137  | 8227  | 23.758917  |
| 20657 | GO:0044644            | cell part                     | 0.57 | 130 | 23.508137  | 8227  | 23.758917  |
| 9750  | GO:0016679            | oxidoreductase activity, act  | 0.57 | 1   | 0.18083182 | 53    | 0.15305975 |
| 25635 | GO:0051345            | positive regulation of hydro  | 0.57 | 1   | 0.18083182 | 53    | 0.15305975 |
| 2657  | GO:0003727 GO:0003728 | single-stranded RNA bindi     | 0.58 | 3   | 0.5424955  | 188   | 0.54292893 |
| 17918 | GO:0035556 GO:0007242 | intracellular signal transdu  | 0.58 | 1   | 0.18083182 | 54    | 0.15594767 |
| 29251 | GO:0070887            | cellular response to chemi    | 0.58 | 1   | 0.18083182 | 54    | 0.15594767 |
| 2628  | GO:0003677            | DNA binding                   | 0.58 | 19  | 3.4358046  | 1224  | 3.534814   |
| 4951  | GO:0006865 GO:0006866 | amino acid transport          | 0.59 | 2   | 0.36166364 | 123   | 0.35521415 |
| 24968 | GO:0050662            | coenzyme binding              | 0.59 | 3   | 0.5424955  | 191   | 0.5515927  |
| 5809  | GO:0008289            | lipid binding                 | 0.59 | 4   | 0.7232273  | 258   | 0.74508333 |
| 9801  | GO:0016747            | transferase activity, transfe | 0.59 | 7   | 1.2658228  | 456   | 1.3168914  |
| 4224  | GO:0005984            | disaccharide metabolic pro    | 0.59 | 1   | 0.18083182 | 56    | 0.16172351 |
| 9369  | GO:0016137            | glycoside metabolic proces    | 0.59 | 1   | 0.18083182 | 56    | 0.16172351 |
| 9883  | GO:0016846            | carbon-sulfur lyase activity  | 0.59 | 1   | 0.18083182 | 56    | 0.16172351 |
| 4849  | GO:0006730 GO:0019753 | one-carbon metabolic proc     | 0.59 | 5   | 0.9041591  | 325   | 0.93857396 |
| 4121  | GO:0005856            | cytoskeleton                  | 0.60 | 2   | 0.36166364 | 126   | 0.3638779  |
| 5715  | GO:0008171            | O-methyltransferase activit   | 0.60 | 1   | 0.18083182 | 57    | 0.16461143 |
| 9813  | GO:0016759            | cellulose synthase activity   | 0.60 | 1   | 0.18083182 | 57    | 0.16461143 |
| 23973 | GO:0048583            | regulation of response to si  | 0.60 | 1   | 0.18083182 | 57    | 0.16461143 |
| 3323  | GO:0004702            | receptor signaling protein s  | 0.61 | 1   | 0.18083182 | 58    | 0.16749935 |
| 5819  | GO:0009299 GO:0009241 | isoprenoid biosynthetic pro   | 0.61 | 1   | 0.18083182 | 58    | 0.16749935 |
| 6665  | GO:0009311            | oligosaccharide metabolic     | 0.61 | 1   | 0.18083182 | 58    | 0.16749935 |
| 8558  | GO:0015145            | monosaccharide transmem       | 0.61 | 1   | 0.18083182 | 58    | 0.16749935 |
| 9018  | GO:0015749            | monosaccharide transport      | 0.61 | 1   | 0.18083182 | 58    | 0.16749935 |
| 3333  | GO:0004712            | protein serine/threonine/tyr  | 0.61 | 1   | 0.18083182 | 59    | 0.17038727 |
| 18981 | GO:0042651            | thylakoid membrane            | 0.61 | 1   | 0.18083182 | 59    | 0.17038727 |
| 30700 | GO:0072341            | modified amino acid bindi     | 0.61 | 1   | 0.18083182 | 59    | 0.17038727 |
| 12572 | GO:0022890 GO:0015082 | inorganic cation transmem     | 0.61 | 5   | 0.9041591  | 332   | 0.9587894  |
| 3340  | GO:0004721            | phosphoprotein phosphata      | 0.62 | 3   | 0.5424955  | 199   | 0.57469606 |
| 2980  | GO:0004185            | serine-type carboxypeptida    | 0.62 | 1   | 0.18083182 | 60    | 0.17327519 |
| 4840  | GO:0006720 GO:0016096 | isoprenoid metabolic proces   | 0.62 | 1   | 0.18083182 | 60    | 0.17327519 |
| 28375 | GO:0070008            | serine-type exopeptidase at   | 0.62 | 1   | 0.18083182 | 60    | 0.17327519 |
| 2818  | GO:0004003            | ATP-dependent DNA helica      | 0.63 | 1   | 0.18083182 | 61    | 0.1761631  |
| 4768  | GO:0006644            | phospholipid metabolic pro    | 0.63 | 1   | 0.18083182 | 61    | 0.1761631  |
| 9874  | GO:0016835            | carbon-oxygen lyase activit   | 0.63 | 3   | 0.5424955  | 202   | 0.5833598  |
| 30069 | GO:0071705            | nitrogen compound transp      | 0.63 | 3   | 0.5424955  | 202   | 0.5833598  |
| 3876  | GO:0005515 GO:0045308 | protein binding               | 0.63 | 108 | 19.529837  | 6933  | 20.021948  |
| 2978  | GO:0004180            | carboxypeptidase activity     | 0.63 | 1   | 0.18083182 | 62    | 0.17905103 |
| 6018  | GO:0008559 GO:0005228 | xenobiotic-transporting ATP   | 0.63 | 1   | 0.18083182 | 62    | 0.17905103 |
| 19225 | GO:0042908            | xenobiotic transport          | 0.63 | 1   | 0.18083182 | 62    | 0.17905103 |
| 19227 | GO:0042910            | xenobiotic transporter activ  | 0.63 | 1   | 0.18083182 | 62    | 0.17905103 |
| 11221 | GO:0019219            | regulation of nucleobase, n   | 0.63 | 41  | 7.414105   | 2675  | 7.7251854  |
| 25468 | GO:0051171            | regulation of nitrogen comp   | 0.63 | 41  | 7.414105   | 2675  | 7.7251854  |
| 9852  | GO:0016810            | hydrolase activity, acting o  | 0.63 | 2   | 0.36166364 | 134   | 0.38698125 |
| 9103  | GO:0015837            | amine transport               | 0.64 | 2   | 0.36166364 | 135   | 0.38986819 |
| 3103  | GO:0004437            | inositol or phosphatidyinos   | 0.64 | 1   | 0.18083182 | 64    | 0.19482687 |
| 22416 | GO:0046915            | transition metal ion transm   | 0.64 | 1   | 0.18083182 | 64    | 0.19482687 |
| 11616 | GO:0019637            | organophosphate metaboli      | 0.65 | 1   | 0.18083182 | 65    | 0.18771479 |
| 2626  | GO:0003674 GO:0005554 | molecular function            | 0.65 | 386 | 69.80109   | 24394 | 70.447914  |
| 9836  | GO:0016787            | hydrolase activity            | 0.65 | 57  | 10.307414  | 3723  | 10.751725  |
| 3473  | GO:0004867            | serine-type endopeptidase     | 0.65 | 1   | 0.18083182 | 66    | 0.1906027  |
| 4561  | GO:0006399            | tRNA metabolic process        | 0.65 | 1   | 0.18083182 | 66    | 0.1906027  |
| 5615  | GO:0008033            | tRNA processing               | 0.65 | 1   | 0.18083182 | 66    | 0.1906027  |
| 9890  | GO:0016854            | racemase and epimerase a      | 0.65 | 1   | 0.18083182 | 66    | 0.1906027  |
| 11829 | GO:0019900            | kinase binding                | 0.65 | 1   | 0.18083182 | 66    | 0.1906027  |
| 3895  | GO:0005543            | phospholipid binding          | 0.66 | 2   | 0.36166364 | 140   | 0.40430877 |
| 2629  | GO:0003678 GO:0003679 | DNA helicase activity         | 0.66 | 1   | 0.18083182 | 67    | 0.19349062 |
| 6046  | GO:0008610            | lipid biosynthetic process    | 0.66 | 2   | 0.36166364 | 141   | 0.4071967  |
| 13164 | GO:0030695            | GTPase regulator activity     | 0.66 | 2   | 0.36166364 | 142   | 0.4100846  |
| 31465 | GO:0080090            | regulation of primary metab   | 0.66 | 41  | 7.414105   | 2710  | 7.826263   |
| 2999  | GO:0004312            | fatty acid synthase activity  | 0.67 | 1   | 0.18083182 | 68    | 0.19637854 |
| 18742 | GO:0042393            | histone binding               | 0.67 | 1   | 0.18083182 | 68    | 0.19637854 |
| 32    | GO:0000041            | transition metal ion transp   | 0.67 | 1   | 0.18083182 | 68    | 0.19637854 |
| 8495  | GO:0015077            | monovalent inorganic catio    | 0.67 | 3   | 0.5424955  | 214   | 0.6180149  |
| 8557  | GO:0015144            | carbohydrate transmembra      | 0.67 | 2   | 0.36166364 | 143   | 0.41297254 |
| 16602 | GO:0034219            | carbohydrate transmembra      | 0.67 | 2   | 0.36166364 | 143   | 0.41297254 |
| 3620  | GO:0005057            | receptor signaling protein a  | 0.67 | 1   | 0.18083182 | 69    | 0.19926646 |
| 4530  | GO:0006355 GO:0032583 | regulation of transcription,  | 0.67 | 39  | 7.052444   | 2591  | 7.482376   |
| 25544 | GO:0051252            | regulation of RNA metaboli    | 0.68 | 39  | 7.052444   | 2593  | 7.482376   |
| 5726  | GO:0008187            | poly-pyrimidine tract bindi   | 0.68 | 1   | 0.18083182 | 70    | 0.20215438 |
| 5788  | GO:0008266            | poly(U) RNA binding           | 0.68 | 1   | 0.18083182 | 70    | 0.20215438 |
| 9191  | GO:0015931            | nucleobase, nucleoside, nu    | 0.68 | 1   | 0.18083182 | 70    | 0.20215438 |
| 9192  | GO:0015932            | nucleobase, nucleoside, nu    | 0.68 | 1   | 0.18083182 | 70    | 0.20215438 |
| 9853  | GO:0016811            | hydrolase activity, acting o  | 0.68 | 1   | 0.18083182 | 70    | 0.20215438 |
| 23522 | GO:0048046            | apoplast                      | 0.68 | 1   | 0.18083182 | 70    | 0.20215438 |
| 3873  | GO:0005507            | copper ion binding            | 0.68 | 2   | 0.36166364 | 146   | 0.42136628 |
| 6071  | GO:0008643 GO:0006861 | carbohydrate transport        | 0.68 | 2   | 0.36166364 | 147   | 0.42452422 |
| 3744  | GO:0005244            | voltage-gated ion channel s   | 0.69 | 1   | 0.18083182 | 72    | 0.20793022 |
| 9740  | GO:0016667            | oxidoreductase activity, act  | 0.69 | 1   | 0.18083182 | 72    | 0.20793022 |
| 9764  | GO:0016701            | oxidoreductase activity, act  | 0.69 | 1   | 0.18083182 | 72    | 0.20793022 |
| 12528 | GO:0022832            | voltage-gated channel activ   | 0.69 | 1   | 0.18083182 | 72    | 0.20793022 |
| 15280 | GO:0032879            | regulation of localization    | 0.69 | 1   | 0.18083182 | 72    | 0.20793022 |
| 17141 | GO:0034762            | regulation of transmembran    | 0.69 | 1   | 0.18083182 | 72    | 0.20793022 |
| 17144 | GO:0034765            | regulation of ion transmem    | 0.69 | 1   | 0.18083182 | 72    | 0.20793022 |
| 19568 | GO:0043269            | regulation of ion transport   | 0.69 | 1   | 0.18083182 | 72    | 0.20793022 |
| 25348 | GO:0051049            | regulation of transport       | 0.69 | 1   | 0.18083182 | 72    | 0.20793022 |



|       |                       |                                |      |     |            |       |            |
|-------|-----------------------|--------------------------------|------|-----|------------|-------|------------|
| 7141  | GO:0009889            | regulation of biosynthetic p   | 0.69 | 39  | 7.052441   | 2605  | 7.523031   |
| 7772  | GO:0010556            | regulation of macromolecu      | 0.69 | 39  | 7.052441   | 2605  | 7.523031   |
| 13756 | GO:0031326            | regulation of cellular biosyn  | 0.69 | 39  | 7.052441   | 2605  | 7.523031   |
| 32213 | GO:2000112            | regulation of cellular macro   | 0.69 | 39  | 7.052441   | 2605  | 7.523031   |
| 27562 | GO:0060589            | nucleoside-triphosphatase      | 0.70 | 2   | 0.36166364 | 152   | 0.4389638  |
| 3627  | GO:0005085 GO:0008433 | quanyl-nucleotide exchange     | 0.70 | 1   | 0.18083182 | 75    | 0.21659398 |
| 4990  | GO:0006915 GO:0008632 | apoptosis                      | 0.70 | 3   | 0.5424955  | 227   | 0.6555578  |
| 5663  | GO:0008094 GO:0004011 | DNA-dependent ATPase ac        | 0.71 | 1   | 0.18083182 | 76    | 0.2194819  |
| 6424  | GO:0009055 GO:0009053 | electron carrier activity      | 0.71 | 2   | 0.36166364 | 154   | 0.44473964 |
| 5604  | GO:0008017            | microtubule binding            | 0.71 | 1   | 0.18083182 | 77    | 0.22236982 |
| 6529  | GO:0009165            | nucleotide biosynthetic pro    | 0.71 | 1   | 0.18083182 | 77    | 0.22236982 |
| 7692  | GO:0010468            | regulation of gene expressi    | 0.71 | 39  | 7.052441   | 2635  | 7.6096687  |
| 9114  | GO:0015849            | organic acid transport         | 0.71 | 2   | 0.36166364 | 156   | 0.45051548 |
| 22443 | GO:0046942            | ligase activity, forming carb  | 0.71 | 2   | 0.36166364 | 156   | 0.45051548 |
| 9909  | GO:0016877            | structure-specific DNA bind    | 0.72 | 1   | 0.18083182 | 78    | 0.22825774 |
| 19832 | GO:0043566            | structure-specific DNA bind    | 0.72 | 1   | 0.18083182 | 78    | 0.22825774 |
| 30865 | GO:0072509            | divalent inorganic cation tra  | 0.72 | 1   | 0.18083182 | 78    | 0.22825774 |
| 3888  | GO:0005529            | sugar binding                  | 0.72 | 2   | 0.36166364 | 158   | 0.45629135 |
| 9682  | GO:0016597            | amino acid binding             | 0.72 | 1   | 0.18083182 | 80    | 0.2310336  |
| 19479 | GO:0043176            | amine binding                  | 0.72 | 1   | 0.18083182 | 80    | 0.2310336  |
| 8496  | GO:0015078            | hydrogen ion transmembran      | 0.73 | 2   | 0.36166364 | 160   | 0.4620672  |
| 6668  | GO:0009314            | response to radiation          | 0.73 | 1   | 0.18083182 | 81    | 0.23392151 |
| 6751  | GO:0009416            | response to light stimulus     | 0.73 | 1   | 0.18083182 | 81    | 0.23392151 |
| 15189 | GO:0032787            | monocarboxylic acid metab      | 0.73 | 1   | 0.18083182 | 81    | 0.23392151 |
| 6991  | GO:0009725            | response to hormone stimu      | 0.73 | 1   | 0.18083182 | 82    | 0.23680943 |
| 29202 | GO:0070838            | divalent metal ion transport   | 0.73 | 1   | 0.18083182 | 82    | 0.23680943 |
| 9839  | GO:0016791 GO:0016302 | phosphatase activity           | 0.73 | 5   | 0.9041591  | 383   | 1.1060733  |
| 27228 | GO:0060255            | regulation of macromolecu      | 0.73 | 39  | 7.052441   | 2660  | 7.6818666  |
| 5756  | GO:0008219            | cell death                     | 0.74 | 3   | 0.5424955  | 239   | 0.69021285 |
| 8209  | GO:0012501 GO:0016244 | programmed cell death          | 0.74 | 3   | 0.5424955  | 239   | 0.69021285 |
| 9462  | GO:0016265            | death                          | 0.74 | 3   | 0.5424955  | 239   | 0.69021285 |
| 5055  | GO:0006996            | organelle organization         | 0.74 | 2   | 0.36166364 | 164   | 0.47361887 |
| 3048  | GO:0004364            | glutathione transferase acti   | 0.74 | 1   | 0.18083182 | 84    | 0.24258527 |
| 4327  | GO:0006091            | generation of precursor me     | 0.74 | 1   | 0.18083182 | 84    | 0.24258527 |
| 30867 | GO:0072511            | divalent inorganic cation tra  | 0.74 | 1   | 0.18083182 | 84    | 0.24258527 |
| 131   | GO:0000186            | nucleotide binding             | 0.74 | 17  | 3.074141   | 1213  | 3.5030468  |
| 2643  | GO:0003700 GO:0000130 | sequence-specific DNA bin      | 0.75 | 20  | 3.6166365  | 1417  | 4.0921826  |
| 716   | GO:0001071            | nucleic acid binding transcr   | 0.75 | 20  | 3.6166365  | 1417  | 4.0921826  |
| 5712  | GO:0008168 GO:0004480 | methyltransferase activity     | 0.75 | 3   | 0.5424955  | 244   | 0.7046524  |
| 5768  | GO:0008238            | exonuclease activity           | 0.75 | 3   | 0.18083182 | 86    | 0.24836111 |
| 6985  | GO:0009719            | response to endogenous st      | 0.75 | 1   | 0.18083182 | 86    | 0.24836111 |
| 12734 | GO:0030163            | protein catabolic process      | 0.75 | 1   | 0.18083182 | 86    | 0.24836111 |
| 3341  | GO:0004722 GO:0000158 | protein serine/threonine ph    | 0.76 | 2   | 0.36166364 | 171   | 0.4938343  |
| 21331 | GO:0045735            | nutrient reservoir activity    | 0.76 | 1   | 0.18083182 | 89    | 0.25702485 |
| 2982  | GO:0004197            | cysteine-type endopeptidas     | 0.77 | 1   | 0.18083182 | 90    | 0.2599128  |
| 4605  | GO:0006457 GO:0007022 | protein folding                | 0.77 | 2   | 0.36166364 | 173   | 0.49961013 |
| 3644  | GO:0005102            | receptor binding               | 0.77 | 1   | 0.18083182 | 91    | 0.2628007  |
| 6784  | GO:0009451 GO:0016547 | RNA modification               | 0.77 | 1   | 0.18083182 | 91    | 0.2628007  |
| 5693  | GO:0008135            | translation factor activity, n | 0.77 | 1   | 0.18083182 | 92    | 0.26568863 |
| 2674  | GO:0003824            | catalytic activity             | 0.77 | 164 | 29.65642   | 10750 | 31.045137  |
| 11712 | GO:0019748            | secondary metabolic proces     | 0.78 | 1   | 0.18083182 | 95    | 0.27435237 |
| 18633 | GO:0042277            | peptide binding                | 0.78 | 1   | 0.18083182 | 95    | 0.27435237 |
| 30306 | GO:0071944            | cell periphery                 | 0.78 | 3   | 0.5424955  | 259   | 0.74797124 |
| 9796  | GO:0016741            | transferase activity, transfe  | 0.79 | 3   | 0.5424955  | 261   | 0.7537471  |
| 9823  | GO:0016772            | transferase activity, transfe  | 0.79 | 27  | 4.882459   | 1932  | 5.579461   |
| 5610  | GO:0008026            | ATP-dependent helicase ac      | 0.79 | 2   | 0.36166364 | 183   | 0.52848935 |
| 28401 | GO:0070035            | purine NTP-dependent heli      | 0.79 | 2   | 0.36166364 | 183   | 0.52848935 |
| 13829 | GO:0031406            | carboxylic acid binding        | 0.79 | 1   | 0.18083182 | 98    | 0.28301615 |
| 20505 | GO:0044255            | cellular lipid metabolic pro   | 0.79 | 2   | 0.36166364 | 184   | 0.53137726 |
| 9486  | GO:0016298            | lipase activity                | 0.80 | 2   | 0.36166364 | 185   | 0.53426516 |
| 3999  | GO:0005694            | chromosome                     | 0.80 | 1   | 0.18083182 | 99    | 0.28590405 |
| 16851 | GO:0034470            | mRNA processing                | 0.80 | 1   | 0.18083182 | 99    | 0.28590405 |
| 17039 | GO:0034660            | mRNA metabolic process         | 0.80 | 1   | 0.18083182 | 99    | 0.28590405 |
| 9488  | GO:0016301            | kinase activity                | 0.80 | 24  | 4.339964   | 1740  | 5.0249805  |
| 3304  | GO:0004672 GO:0050222 | protein kinase activity        | 0.80 | 18  | 3.254973   | 1333  | 3.8495972  |
| 9699  | GO:0016616            | oxidoreductase activity, act   | 0.80 | 3   | 0.5424955  | 266   | 0.7681867  |
| 7271  | GO:0010033            | response to organic subst      | 0.80 | 1   | 0.18083182 | 100   | 0.28879198 |
| 4459  | GO:0006259 GO:0055132 | DNA metabolic process          | 0.80 | 6   | 1.084991   | 493   | 1.4237444  |
| 5705  | GO:0008152            | metabolic process              | 0.80 | 269 | 48.64376   | 17432 | 50.34222   |
| 3306  | GO:0004674 GO:0004695 | protein serine/threonine kin   | 0.80 | 14  | 2.5316455  | 1062  | 3.0669708  |
| 3068  | GO:0004386            | helicase activity              | 0.81 | 2   | 0.36166364 | 189   | 0.54581684 |
| 9494  | GO:0016311            | dephosphorylation              | 0.81 | 5   | 0.9041591  | 425   | 1.227366   |
| 30206 | GO:0071842            | cellular component organiz     | 0.82 | 2   | 0.36166364 | 193   | 0.5573685  |
| 2897  | GO:0004091 GO:0004302 | carboxylesterase activity      | 0.82 | 2   | 0.36166364 | 194   | 0.5602564  |
| 6426  | GO:0009057 GO:0043285 | macromolecule catabolic p      | 0.82 | 1   | 0.18083182 | 106   | 0.3061195  |
| 2653  | GO:0003723            | RNA binding                    | 0.82 | 10  | 1.8083183  | 797   | 2.3016722  |
| 8910  | GO:0015631            | tubulin binding                | 0.82 | 1   | 0.18083182 | 107   | 0.30900744 |
| 3178  | GO:0004519            | endonuclease activity          | 0.82 | 4   | 0.7233273  | 356   | 1.0280994  |
| 3626  | GO:0005083            | small GTPase regulator act     | 0.83 | 1   | 0.18083182 | 111   | 0.3205591  |
| 19686 | GO:0043414            | macromolecule methylation      | 0.84 | 1   | 0.18083182 | 113   | 0.32633495 |
| 18912 | GO:0042578            | phosphoric ester hydrolase     | 0.84 | 5   | 0.9041591  | 444   | 1.2822365  |
| 22478 | GO:0046982            | protein heterodimerization     | 0.84 | 1   | 0.18083182 | 114   | 0.32922286 |
| 4612  | GO:0006468            | protein phosphorylation        | 0.84 | 30  | 5.424955   | 2205  | 6.367863   |
| 9697  | GO:0016614            | oxidoreductase activity, act   | 0.85 | 3   | 0.5424955  | 293   | 0.84616053 |
| 2521  | GO:0003333            | amino acid transmembran        | 0.85 | 1   | 0.18083182 | 118   | 0.34077454 |
| 8584  | GO:0016111 GO:0015359 | amino acid transmembran        | 0.85 | 2   | 0.36166364 | 118   | 0.34077454 |
| 18956 | GO:0042626            | ATPase activity, coupled to    | 0.85 | 1   | 0.36166364 | 211   | 0.6093511  |
| 9861  | GO:0016820            | hydrolase activity, acting o   | 0.85 | 2   | 0.36166364 | 212   | 0.612239   |
| 9493  | GO:0016310            | phosphorylation                | 0.86 | 34  | 6.148282   | 2504  | 7.2313514  |
| 18953 | GO:0042623            | ATPase activity, coupled       | 0.86 | 6   | 1.084991   | 537   | 1.550813   |
| 6884  | GO:0009607            | response to biotic stimulus    | 0.86 | 1   | 0.18083182 | 122   | 0.3523262  |
| 12532 | GO:0022836            | gated channel activity         | 0.86 | 1   | 0.18083182 | 122   | 0.3523262  |
| 25485 | GO:0051188            | cofactor biosynthetic proces   | 0.86 | 1   | 0.18083182 | 123   | 0.35521415 |
| 3863  | GO:0005488            | binding                        | 0.86 | 210 | 37.97468   | 13903 | 40.15075   |
| 4236  | GO:0005996            | monosaccharide metabolic       | 0.87 | 1   | 0.18083182 | 125   | 0.36099    |
| 3761  | GO:0005275 GO:0005279 | amine transmembrane tran       | 0.87 | 1   | 0.18083182 | 126   | 0.3638779  |
| 9913  | GO:0016881            | acid-amino acid ligase acti    | 0.87 | 4   | 0.7233273  | 391   | 1.1291766  |
| 22415 | GO:0046914            | transition metal ion binding   | 0.87 | 35  | 6.329114   | 2599  | 7.5057034  |
| 4526  | GO:0006351 GO:0006350 | transcription, DNA-depend      | 0.88 | 20  | 3.6166365  | 1575  | 4.548474   |
| 15176 | GO:0032774            | RNA biosynthetic process       | 0.88 | 20  | 3.6166365  | 1575  | 4.548474   |
| 2758  | GO:0003924            | GTPase activity                | 0.88 | 1   | 0.18083182 | 132   | 0.3812054  |
| 4394  | GO:0006184            | GTP catabolic process          | 0.88 | 1   | 0.18083182 | 132   | 0.3812054  |
| 21605 | GO:0046039            | GTP metabolic process          | 0.88 | 1   | 0.18083182 | 132   | 0.3812054  |
| 4408  | GO:0006200            | ATP catabolic process          | 0.89 | 7   | 1.2658228  | 641   | 1.8511566  |
| 9918  | GO:0016887 GO:0004002 | ATPase activity                | 0.89 | 7   | 1.2658228  | 641   | 1.8511566  |
| 21600 | GO:0046034            | ATP metabolic process          | 0.89 | 7   | 1.2658228  | 641   | 1.8511566  |
| 3801  | GO:0005342            | organic acid transmembran      | 0.89 | 1   | 0.18083182 | 136   | 0.3927571  |
| 22444 | GO:0046943            | carboxylic acid transmembr     | 0.89 | 1   | 0.18083182 | 136   | 0.3927571  |
| 19758 | GO:0005492            | ATPase activity, coupled to    | 0.89 | 2   | 0.36166364 | 235   | 0.97866117 |
| 3724  | GO:0005216            | ion channel activity           | 0.90 | 1   | 0.18083182 | 140   | 0.46430877 |
| 23515 | GO:0048037            | cofactor binding               | 0.90 | 3   | 0.5424955  | 327   | 0.84434977 |
| 5909  | GO:0008415            | acyltransferase activity       | 0.90 | 3   | 0.5424955  | 330   | 0.85301354 |
| 4897  | GO:0006793            | phosphorus metabolic proc      | 0.90 | 39  | 7.052441   | 2925  | 8.4471655  |
| 4900  | GO:0006796            | phosphate metabolic proces     | 0.90 | 39  | 7.052441   | 2925  | 8.4471655  |
| 4304  | GO:0006066            | alcohol metabolic process      | 0.90 | 1   | 0.18083182 | 143   | 0.41297254 |
| 9895  | GO:0016860            | intramolecular oxidoreduct     | 0.91 | 1   | 0.18083182 | 146   | 0.42163628 |
| 6824  | GO:0009536            | plastid                        | 0.91 | 2   | 0.36166364 | 247   | 0.7133162  |
| 5661  | GO:0008092            | cytoskeletal protein bindin    | 0.91 | 2   | 0.36166364 | 249   | 0.719092   |
| 3177  | GO:0004518            | nuclease activity              | 0.91 | 4   | 0.7233273  | 427   | 1.2331418  |
| 9824  | GO:0016773            | phosphotransferase activity    | 0.91 | 18  | 3.254973   | 1493  | 4.311664   |
| 8749  | GO:0015399            | primary active transmembr      | 0.92 | 2   | 0.36166364 | 260   | 0.75085914 |
| 8753  | GO:0015405            | P-P-bond-hydrolysis-driven     | 0.92 | 2   | 0.36166364 | 260   | 0.75085914 |
| 9285  | GO:0016043            | cellular component organiz     | 0.92 | 2   | 0.36166364 | 261   | 0.7537471  |
| 5764  | GO:0008234 GO:0004220 | cysteine-type peptidase act    | 0.93 | 1   | 0.18083182 | 163   | 0.47073093 |
| 4405  | GO:0006195            | purine nucleotide catabolic    | 0.93 | 8   | 1.4466546  | 773   | 2.232362   |
| 6508  | GO:0009143            | nucleoside triphosphate cat    | 0.93 | 8   | 1.4466546  | 773   | 2.232362   |
| 6509  | GO:0009144            | purine nucleoside triphosph    | 0.93 | 8   | 1.4466546  | 773   | 2.232362   |



|       |                        |                               |      |     |            |       |            |
|-------|------------------------|-------------------------------|------|-----|------------|-------|------------|
| 6511  | GO:0009146             | purine nucleoside triphosph   | 0.93 | 8   | 1.4466546  | 773   | 2.232362   |
| 6519  | GO:0009154             | purine ribonucleotide catab   | 0.93 | 8   | 1.4466546  | 773   | 2.232362   |
| 6530  | GO:0009166             | nucleotide catabolic proces   | 0.93 | 8   | 1.4466546  | 773   | 2.232362   |
| 6567  | GO:0009203             | ribonucleoside triphosphate   | 0.93 | 8   | 1.4466546  | 773   | 2.232362   |
| 6569  | GO:0009205             | purine ribonucleoside triph   | 0.93 | 8   | 1.4466546  | 773   | 2.232362   |
| 6571  | GO:0009207             | purine ribonucleoside triph   | 0.93 | 8   | 1.4466546  | 773   | 2.232362   |
| 6624  | GO:0009261             | ribonucleotide catabolic pro  | 0.93 | 8   | 1.4466546  | 773   | 2.232362   |
| 17034 | GO:0034655             | nucleobase, nucleoside, nu    | 0.93 | 8   | 1.4466546  | 773   | 2.232362   |
| 17035 | GO:0034656             | nucleobase, nucleoside and    | 0.93 | 8   | 1.4466546  | 773   | 2.232362   |
| 22209 | GO:0046700             | heterocycle catabolic proces  | 0.93 | 8   | 1.4466546  | 773   | 2.232362   |
| 30879 | GO:0072523             | purine-containing compoun     | 0.93 | 8   | 1.4466546  | 773   | 2.232362   |
| 25483 | GO:0051186             | cofactor metabolic process    | 0.93 | 1   | 0.18083182 | 164   | 0.47361887 |
| 2627  | GO:0003676             | nucleic acid binding          | 0.93 | 31  | 5.505787   | 2453  | 7.0840673  |
| 20520 | GO:0044270             | cellular nitrogen compound    | 0.93 | 8   | 1.4466546  | 777   | 2.2439137  |
| 4476  | GO:0005278             | RNA-dependent DNA repli       | 0.93 | 1   | 0.18083182 | 166   | 0.4739347  |
| 20521 | GO:0044271             | cellular nitrogen compound    | 0.93 | 3   | 0.5424955  | 367   | 1.0598665  |
| 9911  | GO:0018879             | ligase activity, forming cart | 0.93 | 4   | 0.723273   | 456   | 1.3188914  |
| 6899  | GO:0009628             | response to abiotic stimul    | 0.94 | 1   | 0.18083182 | 170   | 0.49094638 |
| 26932 | GO:0055086             | nucleobase, nucleoside and    | 0.94 | 10  | 1.8083183  | 944   | 2.7261963  |
| 6563  | GO:0009199             | ribonucleoside triphosphate   | 0.94 | 8   | 1.4466546  | 790   | 2.2814567  |
| 6515  | GO:0009150             | purine ribonucleotide meta    | 0.94 | 8   | 1.4466546  | 791   | 2.2834447  |
| 3874  | GO:0005509             | calcium ion binding           | 0.94 | 2   | 0.36166364 | 279   | 0.8057296  |
| 11522 | GO:0019538(GO:0006411) | protein metabolic process     | 0.94 | 55  | 9.94575    | 4134  | 11.938661  |
| 6506  | GO:0009141             | nucleoside triphosphate me    | 0.94 | 8   | 1.4466546  | 796   | 2.2987843  |
| 9579  | GO:0016462             | pyrophosphatase activity      | 0.94 | 10  | 1.8083183  | 954   | 2.7550755  |
| 9859  | GO:0016818             | hydrolase activity, acting o  | 0.94 | 10  | 1.8083183  | 956   | 2.7608514  |
| 10058 | GO:0017111             | nucleoside-triphosphatase     | 0.94 | 9   | 1.6274865  | 878   | 2.5355935  |
| 11787 | GO:0019842             | vitamin binding               | 0.94 | 1   | 0.18083182 | 177   | 0.5111618  |
| 20622 | GO:0044428             | nuclear part                  | 0.94 | 1   | 0.18083182 | 178   | 0.5140497  |
| 30205 | GO:0071841             | cellular component organiz    | 0.94 | 2   | 0.36166364 | 285   | 0.8230572  |
| 9858  | GO:0016817             | hydrolase activity, acting o  | 0.94 | 10  | 1.8083183  | 959   | 2.769515   |
| 17024 | GO:0034645(GO:0034961) | cellular macromolecule bio    | 0.94 | 24  | 4.339964   | 1999  | 5.7729516  |
| 4572  | GO:0006412(GO:0006416) | translation                   | 0.95 | 1   | 0.18083182 | 180   | 0.5198256  |
| 6428  | GO:0009059(GO:0043284) | macromolecule biosynthetic    | 0.95 | 24  | 4.339964   | 2003  | 5.7845035  |
| 4373  | GO:0006163             | purine nucleotide metabolic   | 0.95 | 8   | 1.4466546  | 810   | 2.339215   |
| 6622  | GO:0009259(GO:0009121) | ribonucleotide metabolic pr   | 0.95 | 8   | 1.4466546  | 812   | 2.344991   |
| 4844  | GO:0006725             | cellular aromatic compound    | 0.95 | 1   | 0.18083182 | 185   | 0.53426516 |
| 30877 | GO:0072521             | purine-containing compound    | 0.95 | 8   | 1.4466546  | 827   | 2.3993097  |
| 4867  | GO:0006753             | nucleoside phosphate meta     | 0.96 | 9   | 1.6274865  | 914   | 2.6395588  |
| 6484  | GO:0009117             | nucleotide metabolic proces   | 0.96 | 9   | 1.6274865  | 914   | 2.6395588  |
| 9889  | GO:0016853             | isomerase activity            | 0.96 | 2   | 0.36166364 | 306   | 0.8837035  |
| 10244 | GO:0018130             | heterocycle biosynthetic pro  | 0.96 | 1   | 0.18083182 | 199   | 0.57469606 |
| 22375 | GO:0046872             | metal ion binding             | 0.96 | 37  | 6.690778   | 2985  | 8.6204405  |
| 14380 | GO:0031967             | organelle envelope            | 0.96 | 1   | 0.18083182 | 201   | 0.5804719  |
| 19470 | GO:0043167             | ion binding                   | 0.96 | 37  | 6.690778   | 2997  | 8.655096   |
| 19472 | GO:0043169             | cation binding                | 0.96 | 37  | 6.690778   | 2997  | 8.655096   |
| 9906  | GO:0016874             | ligase activity               | 0.96 | 5   | 0.9041591  | 597   | 1.7240882  |
| 14387 | GO:0031975             | envelope                      | 0.96 | 1   | 0.18083182 | 205   | 0.59202355 |
| 22007 | GO:0046483             | heterocycle metabolic proc    | 0.96 | 11  | 1.98915    | 1094  | 3.1593843  |
| 20532 | GO:0044282             | small molecule catabolic pr   | 0.96 | 8   | 1.4466546  | 854   | 2.4662836  |
| 9308  | GO:0016070             | RNA metabolic process         | 0.96 | 21  | 3.7974684  | 1855  | 5.3570914  |
| 3449  | GO:0004842(GO:0004840) | ubiquitin-protein ligase acti | 0.97 | 2   | 0.36166364 | 326   | 0.94146186 |
| 20488 | GO:0044238             | primary metabolic process     | 0.97 | 128 | 23.146473  | 9167  | 26.47356   |
| 9654  | GO:0016567             | protein ubiquitination        | 0.97 | 2   | 0.36166364 | 332   | 0.9587894  |
| 14854 | GO:0032446             | protein modification by sma   | 0.97 | 2   | 0.36166364 | 332   | 0.9587894  |
| 29011 | GO:0070647             | protein modification by sma   | 0.97 | 2   | 0.36166364 | 332   | 0.9587894  |
| 4558  | GO:0006396(GO:0006394) | RNA processing                | 0.97 | 1   | 0.18083182 | 219   | 0.63245445 |
| 11747 | GO:0019787(GO:0008639) | small conjugating protein li  | 0.97 | 2   | 0.36166364 | 339   | 0.9790048  |
| 31895 | GO:0090304             | nucleic acid metabolic proc   | 0.97 | 27  | 4.882459   | 2340  | 6.75737324 |
| 4460  | GO:0006260(GO:0055133) | DNA replication               | 0.97 | 1   | 0.18083182 | 224   | 0.64689404 |
| 7691  | GO:0010467             | gene expression               | 0.97 | 22  | 3.9783     | 1974  | 5.7007537  |
| 20498 | GO:0044248             | cellular catabolic process    | 0.98 | 8   | 1.4466546  | 894   | 2.5518002  |
| 6796  | GO:0003507             | chloroplast                   | 0.98 | 1   | 0.18083182 | 229   | 0.6613336  |
| 20533 | GO:0044283             | small molecule biosynthetic   | 0.98 | 2   | 0.36166364 | 347   | 1.0021082  |
| 8211  | GO:0012505             | endomembrane system           | 0.98 | 1   | 0.18083182 | 242   | 0.6988766  |
| 30204 | GO:0071840             | cellular component organiz    | 0.98 | 2   | 0.36166364 | 362   | 1.045427   |
| 4609  | GO:0006464             | protein modification proces   | 0.98 | 32  | 5.786618   | 2781  | 8.031305   |
| 19533 | GO:0043234             | protein complex               | 0.98 | 7   | 1.2658228  | 848   | 2.448956   |
| 6427  | GO:0009058             | biosynthetic process          | 0.98 | 32  | 5.786618   | 2796  | 8.074624   |
| 19684 | GO:0043412             | macromolecule modificatio     | 0.99 | 33  | 5.96745    | 2900  | 8.374968   |
| 3716  | GO:0005198             | structural molecule activity  | 0.99 | 2   | 0.36166364 | 393   | 1.1349525  |
| 6425  | GO:0009056             | catabolic process             | 0.99 | 9   | 1.6274865  | 1051  | 3.0352037  |
| 20499 | GO:0044249             | cellular biosynthetic proces  | 0.99 | 29  | 5.244123   | 2635  | 7.6096687  |
| 19473 | GO:0043170(GO:0043283) | macromolecule metabolic p     | 0.99 | 84  | 15.189874  | 6553  | 18.92454   |
| 3955  | GO:0006634             | nucleus                       | 0.99 | 13  | 2.3508136  | 1433  | 4.138389   |
| 4357  | GO:0006139(GO:0055134) | nucleobase, nucleoside, nu    | 0.99 | 37  | 6.690778   | 3285  | 9.486816   |
| 20517 | GO:0044267             | cellular protein metabolic p  | 0.99 | 36  | 6.509946   | 3225  | 9.313541   |
| 20531 | GO:0044281             | small molecule metabolic p    | 0.99 | 17  | 3.074141   | 1788  | 5.1636004  |
| 4320  | GO:0006082             | organic acid metabolic prod   | 1.00 | 1   | 0.18083182 | 369   | 1.0656425  |
| 11716 | GO:0019752             | carboxylic acid metabolic p   | 1.00 | 1   | 0.18083182 | 369   | 1.0656425  |
| 19707 | GO:0043436             | oxoacid metabolic process     | 1.00 | 1   | 0.18083182 | 369   | 1.0656425  |
| 7229  | GO:0009987(GO:0008151) | cellular process              | 1.00 | 140 | 25.316456  | 10601 | 30.814838  |
| 18541 | GO:0042180             | cellular ketone metabolic p   | 1.00 | 1   | 0.18083182 | 375   | 1.0829699  |
| 20510 | GO:0044260(GO:0034960) | cellular macromolecule me     | 1.00 | 65  | 11.754068  | 5577  | 16.105928  |
| 17020 | GO:0034641             | cellular nitrogen compound    | 1.00 | 38  | 6.871609   | 3678  | 10.621769  |
| 20640 | GO:0044446             | intracellular organelle part  | 1.00 | 3   | 0.5424955  | 710   | 2.0504231  |
| 20616 | GO:0044422             | organelle part                | 1.00 | 3   | 0.5424955  | 712   | 2.0561988  |
| 4906  | GO:0006907             | nitrogen compound metabo      | 1.00 | 38  | 6.871609   | 3725  | 10.757502  |
| 19527 | GO:0043228             | non-membrane-bounded org      | 1.00 | 4   | 0.723273   | 923   | 2.66555    |
| 19531 | GO:0043232             | intracellular non-membran     | 1.00 | 4   | 0.723273   | 923   | 2.66555    |
| 20487 | GO:0044237             | cellular metabolic process    | 1.00 | 94  | 16.998192  | 8185  | 23.637625  |
| 19526 | GO:0043227             | membrane-bounded organ        | 1.00 | 15  | 2.7124774  | 2142  | 6.185924   |
| 19530 | GO:0043231             | intracellular membrane-bou    | 1.00 | 15  | 2.7124774  | 2142  | 6.185924   |
| 4109  | GO:0005840(GO:0033279) | ribosome                      | 1.00 | 1   | 0.18083182 | 682   | 1.9695613  |
| 5791  | GO:0008270             | zinc ion binding              | 1.00 | 11  | 1.98915    | 1880  | 5.4292893  |
| 15392 | GO:0032991             | macromolecular complex        | 1.00 | 8   | 1.4466546  | 1616  | 4.666878   |
| 13018 | GO:0030529             | ribonucleoprotein complex     | 1.00 | 1   | 0.18083182 | 741   | 2.1399486  |
| 19525 | GO:0043226             | organelle                     | 1.00 | 19  | 3.4358046  | 3013  | 8.701303   |
| 19528 | GO:0043229             | intracellular organelle       | 1.00 | 19  | 3.4358046  | 3013  | 8.701303   |
| 3945  | GO:0005622             | intracellular                 | 1.00 | 37  | 6.690778   | 4751  | 13.720507  |
| 20618 | GO:0044424             | intracellular part            | 1.00 | 27  | 4.882459   | 3853  | 11.127155  |
| 4027  | GO:0005737             | cytoplasm                     | 1.00 | 7   | 1.2658228  | 2001  | 5.7787275  |
| 20638 | GO:0044444             | cytoplasmic part              | 1.00 | 4   | 0.723273   | 1644  | 4.7477403  |



| GO ID | GO ACCESSION        | GO Term                    | p-value | Count in Selection | % Count in Selection | Count in Total | % Count in Total |
|-------|---------------------|----------------------------|---------|--------------------|----------------------|----------------|------------------|
| 4476  | GO:0006278          | RNA-dependent DNA re       | 0.00    | 38                 | 5.322129             | 166            | 0.4793947        |
| 4459  | GO:0006259 GO:00551 | DNA metabolic process      | 0.00    | 59                 | 8.263306             | 493            | 1.4237444        |
| 4460  | GO:0006260 GO:00551 | DNA replication            | 0.00    | 38                 | 5.322129             | 224            | 0.64689404       |
| 8493  | GO:0015074          | DNA integration            | 0.00    | 21                 | 2.9411764            | 47             | 0.13573223       |
| 31895 | GO:0090304          | nucleic acid metabolic p   | 0.00    | 94                 | 13.165266            | 2340           | 6.7577324        |
| 31393 | GO:0080016          | (-)-E-beta-caryophyllene   | 0.00    | 9                  | 1.2605042            | 25             | 0.072197996      |
| 31394 | GO:0080017          | alpha-humulene synthase    | 0.00    | 9                  | 1.2605042            | 25             | 0.072197996      |
| 7558  | GO:0010334          | sesquiterpene synthase     | 0.00    | 9                  | 1.2605042            | 29             | 0.083749674      |
| 7222  | GO:0009975          | cyclase activity           | 0.00    | 9                  | 1.2605042            | 31             | 0.08952551       |
| 7557  | GO:0010333          | terpene synthase activit   | 0.00    | 11                 | 1.5406163            | 57             | 0.16461143       |
| 9877  | GO:0016838          | carbon-oxygen lyase ac     | 0.00    | 12                 | 1.6806723            | 77             | 0.22236982       |
| 4357  | GO:0006139 GO:00551 | nucleobase, nucleoside     | 0.00    | 111                | 15.546219            | 3285           | 9.486816         |
| 17024 | GO:0034645 GO:00349 | cellular macromolecule     | 0.00    | 73                 | 10.22409             | 1999           | 5.7729516        |
| 6428  | GO:0009059 GO:00432 | macromolecule biosynt      | 0.00    | 73                 | 10.22409             | 2003           | 5.7845035        |
| 17020 | GO:0034641          | cellular nitrogen compo    | 0.00    | 114                | 15.966387            | 3678           | 10.621769        |
| 4906  | GO:0006807          | nitrogen compound met      | 0.00    | 114                | 15.966387            | 3725           | 10.757502        |
| 6884  | GO:0009607          | response to biotic stimu   | 0.00    | 11                 | 1.5406163            | 122            | 0.3523262        |
| 23522 | GO:0048046          | apoplast                   | 0.00    | 8                  | 1.1204482            | 70             | 0.20215438       |
| 5705  | GO:0008152          | metabolic process          | 0.00    | 408                | 57.142857            | 17432          | 50.34222         |
| 9869  | GO:0016829          | lyase activity             | 0.00    | 23                 | 3.2212884            | 488            | 1.4093049        |
| 22375 | GO:0046872          | metal ion binding          | 0.00    | 89                 | 12.464986            | 2985           | 8.6204405        |
| 9874  | GO:0016835          | carbon-oxygen lyase ac     | 0.00    | 13                 | 1.8207283            | 202            | 0.5833598        |
| 19470 | GO:0043167          | ion binding                | 0.00    | 89                 | 12.464986            | 2997           | 8.655096         |
| 19472 | GO:0043169          | cation binding             | 0.00    | 89                 | 12.464986            | 2997           | 8.655096         |
| 20499 | GO:0044249          | cellular biosynthetic pro  | 0.00    | 80                 | 11.204482            | 2635           | 7.6096687        |
| 3009  | GO:0004322          | ferroxidase activity       | 0.00    | 5                  | 0.70028013           | 30             | 0.086637594      |
| 9785  | GO:0016724          | oxidoreductase activity,   | 0.00    | 5                  | 0.70028013           | 30             | 0.086637594      |
| 6427  | GO:0009058          | biosynthetic process       | 0.00    | 83                 | 11.62465             | 2796           | 8.074624         |
| 26959 | GO:0055114          | oxidation-reduction proc   | 0.00    | 75                 | 10.504202            | 2490           | 7.1909204        |
| 2864  | GO:0004058 GO:00164 | aromatic-L-amino-acid d    | 0.00    | 3                  | 0.42016807           | 9              | 0.025991278      |
| 3874  | GO:0005509          | calcium ion binding        | 0.00    | 15                 | 2.1008403            | 279            | 0.8057296        |
| 3904  | GO:0005576          | extracellular region       | 0.00    | 11                 | 1.5406163            | 178            | 0.5140497        |
| 3386  | GO:0004773          | sterol-sulfatase activity  | 0.00    | 3                  | 0.42016807           | 12             | 0.03465504       |
| 5965  | GO:0008484          | sulfuric ester hydrolase   | 0.00    | 3                  | 0.42016807           | 12             | 0.03465504       |
| 9816  | GO:0016762          | xyloglucan:xyloglucosyl    | 0.00    | 4                  | 0.5602241            | 27             | 0.077973835      |
| 5704  | GO:0008150 GO:00000 | biological_process         | 0.00    | 494                | 69.187675            | 22215          | 64.155136        |
| 3473  | GO:0004867          | serine-type endopeptida    | 0.00    | 6                  | 0.84033614           | 66             | 0.1906027        |
| 5791  | GO:0008270          | zinc ion binding           | 0.00    | 57                 | 7.9831934            | 1880           | 5.4292893        |
| 14101 | GO:0031683          | G-protein beta/gamma-s     | 0.00    | 3                  | 0.42016807           | 15             | 0.043318797      |
| 9783  | GO:0016722          | oxidoreductase activity,   | 0.00    | 5                  | 0.70028013           | 50             | 0.14439599       |
| 18757 | GO:0042409          | caffeoyl-CoA O-methylt     | 0.00    | 3                  | 0.42016807           | 16             | 0.046206716      |
| 25837 | GO:0051553          | flavone biosynthetic pro   | 0.00    | 4                  | 0.5602241            | 32             | 0.09241343       |
| 25838 | GO:0051554          | flavonol metabolic proc    | 0.00    | 4                  | 0.5602241            | 32             | 0.09241343       |
| 25839 | GO:0051555          | flavonol biosynthetic pro  | 0.00    | 4                  | 0.5602241            | 32             | 0.09241343       |
| 21041 | GO:0045431          | flavonol synthase activi   | 0.00    | 4                  | 0.5602241            | 32             | 0.09241343       |
| 25836 | GO:0051552          | flavone metabolic proces   | 0.00    | 4                  | 0.5602241            | 32             | 0.09241343       |
| 19707 | GO:0043436          | oxoacid metabolic proces   | 0.00    | 16                 | 2.2408965            | 369            | 1.0656425        |
| 4320  | GO:0006082          | organic acid metabolic p   | 0.00    | 16                 | 2.2408965            | 369            | 1.0656425        |
| 11716 | GO:0019752          | carboxylic acid metabol    | 0.00    | 16                 | 2.2408965            | 369            | 1.0656425        |
| 22415 | GO:0046914          | transition metal ion bind  | 0.00    | 73                 | 10.22409             | 2599           | 7.5057034        |
| 5702  | GO:0008146          | sulfotransferase activity  | 0.01    | 5                  | 0.70028013           | 54             | 0.15594767       |
| 18541 | GO:0042180          | cellular ketone metaboli   | 0.01    | 6                  | 0.84033614           | 375            | 1.0829699        |
| 3888  | GO:0005529          | sugar binding              | 0.01    | 9                  | 1.2605042            | 158            | 0.45629135       |
| 7072  | GO:0009813          | flavonoid biosynthetic p   | 0.01    | 4                  | 0.5602241            | 40             | 0.1155168        |
| 13038 | GO:0030551          | cyclic nucleotide binding  | 0.01    | 3                  | 0.42016807           | 22             | 0.06353424       |
| 3256  | GO:0004616          | phosphogluconate dehy      | 0.01    | 2                  | 0.28011206           | 8              | 0.023103358      |
| 7071  | GO:0009812          | flavonoid metabolic pro    | 0.01    | 4                  | 0.5602241            | 44             | 0.12706847       |
| 3472  | GO:0004866          | endopeptidase inhibitor    | 0.01    | 6                  | 0.84033614           | 95             | 0.27435237       |
| 8159  | GO:0010951          | negative regulation of e   | 0.01    | 6                  | 0.84033614           | 95             | 0.27435237       |
| 26712 | GO:0052548          | regulation of endopeptid   | 0.01    | 6                  | 0.84033614           | 95             | 0.27435237       |
| 28101 | GO:0061135          | endopeptidase regulato     | 0.01    | 6                  | 0.84033614           | 95             | 0.27435237       |
| 12805 | GO:0030246          | carbohydrate binding       | 0.02    | 11                 | 1.5406163            | 251            | 0.7248679        |
| 6632  | GO:0009269          | response to desiccation    | 0.02    | 2                  | 0.28011206           | 10             | 0.0288792        |
| 21148 | GO:0045547          | dehydrodichyl diphosp      | 0.02    | 2                  | 0.28011206           | 10             | 0.0288792        |
| 6750  | GO:0009415          | response to water          | 0.02    | 4                  | 0.5602241            | 49             | 0.14150807       |
| 9832  | GO:0016782          | transferase activity, tran | 0.02    | 5                  | 0.70028013           | 74             | 0.21370606       |
| 9767  | GO:0016705          | oxidoreductase activity,   | 0.02    | 13                 | 1.8207283            | 329            | 0.95012563       |
| 19473 | GO:0043170 GO:00432 | macromolecule metabo       | 0.02    | 157                | 21.988796            | 6553           | 18.92454         |
| 6965  | GO:0009699          | phenylpropanoid biosynt    | 0.02    | 4                  | 0.5602241            | 52             | 0.15017183       |
| 7690  | GO:0010466          | negative regulation of p   | 0.03    | 6                  | 0.84033614           | 110            | 0.31767118       |
| 12946 | GO:0030414          | peptidase inhibitor activ  | 0.03    | 6                  | 0.84033614           | 110            | 0.31767118       |
| 25636 | GO:0051346          | negative regulation of h   | 0.03    | 6                  | 0.84033614           | 110            | 0.31767118       |
| 26711 | GO:0052547          | regulation of peptidase    | 0.03    | 6                  | 0.84033614           | 112            | 0.32344702       |
| 28100 | GO:0061134          | peptidase regulator acti   | 0.03    | 6                  | 0.84033614           | 112            | 0.32344702       |
| 5715  | GO:0008171          | O-methyltransferase ac     | 0.03    | 4                  | 0.5602241            | 57             | 0.16461143       |
| 9871  | GO:0016831          | carboxy-lyase activity     | 0.03    | 6                  | 0.84033614           | 115            | 0.3321108        |
| 11776 | GO:0019825          | oxygen binding             | 0.03    | 14                 | 1.9607843            | 389            | 1.1234008        |
| 31408 | GO:0080031          | methyl salicylate estera   | 0.03    | 2                  | 0.28011206           | 14             | 0.040430877      |
| 6964  | GO:0009698          | phenylpropanoid metab      | 0.04    | 4                  | 0.5602241            | 60             | 0.17327519       |
| 14811 | GO:0032403          | protein complex binding    | 0.04    | 4                  | 0.5602241            | 60             | 0.17327519       |
| 9393  | GO:0016165          | lipoxygenase activity      | 0.04    | 3                  | 0.42016807           | 36             | 0.10396511       |
| 6018  | GO:0008559 GO:00052 | xenobiotic-transporting    | 0.04    | 4                  | 0.5602241            | 62             | 0.17905103       |
| 19225 | GO:0042908          | xenobiotic transport       | 0.04    | 4                  | 0.5602241            | 62             | 0.17905103       |
| 19227 | GO:0042910          | xenobiotic transporter a   | 0.04    | 4                  | 0.5602241            | 62             | 0.17905103       |
| 4699  | GO:0006570          | tyrosine metabolic proc    | 0.04    | 1                  | 0.14005603           | 2              | 0.00577584       |
| 4700  | GO:0006571          | tyrosine biosynthetic pr   | 0.04    | 1                  | 0.14005603           | 2              | 0.00577584       |
| 9419  | GO:0016206          | catechol O-methyltransf    | 0.04    | 1                  | 0.14005603           | 2              | 0.00577584       |
| 3382  | GO:0004768 GO:00162 | stearoyl-CoA 9-desatura    | 0.04    | 2                  | 0.28011206           | 16             | 0.046206716      |
| 9427  | GO:0016215          | CoA desaturase activity    | 0.04    | 2                  | 0.28011206           | 16             | 0.046206716      |
| 31396 | GO:0080019          | fatty-acyl-CoA reductas    | 0.04    | 2                  | 0.28011206           | 16             | 0.046206716      |
| 6749  | GO:0009414          | response to water depriv   | 0.04    | 3                  | 0.42016807           | 38             | 0.10974095       |
| 21710 | GO:0046148          | pigment biosynthetic pro   | 0.05    | 4                  | 0.5602241            | 69             | 0.19926646       |
| 9812  | GO:0016758          | transferase activity, tran | 0.06    | 16                 | 2.2408965            | 501            | 1.4468478        |
| 13651 | GO:0031219          | levanase activity          | 0.06    | 1                  | 0.14005603           | 3              | 0.00866376       |
| 9764  | GO:0016701          | oxidoreductase activity,   | 0.06    | 4                  | 0.5602241            | 72             | 0.20793022       |
| 9753  | GO:0016682          | oxidoreductase activity,   | 0.06    | 3                  | 0.42016807           | 44             | 0.12706847       |
| 18786 | GO:0042440          | pigment metabolic proc     | 0.06    | 4                  | 0.5602241            | 73             | 0.21081814       |
| 8666  | GO:0015276          | ligand-gated ion channel   | 0.07    | 3                  | 0.42016807           | 45             | 0.1299564        |
| 12530 | GO:0022834          | ligand-gated channel ad    | 0.07    | 3                  | 0.42016807           | 45             | 0.1299564        |
| 23518 | GO:0048040          | UDP-glucuronate decar      | 0.07    | 2                  | 0.28011206           | 21             | 0.060646318      |
| 3129  | GO:0004467          | long-chain fatty acid-Co   | 0.07    | 2                  | 0.28011206           | 21             | 0.060646318      |



|       |                     |                            |      |     |            |      |             |
|-------|---------------------|----------------------------|------|-----|------------|------|-------------|
| 20510 | GO:0044260 GO:00349 | cellular macromolecul      | 0.07 | 130 | 18.207283  | 5577 | 16.105928   |
| 9768  | GO:0016706          | oxidoreductase activi      | 0.07 | 7   | 0.98039216 | 175  | 0.505386    |
| 18956 | GO:0042626          | ATPase activity, couple    | 0.07 | 8   | 1.1204482  | 211  | 0.6093511   |
| 9861  | GO:0016820          | hydrolase activity, acti   | 0.07 | 8   | 1.1204482  | 212  | 0.612239    |
| 24858 | GO:0050551          | myrcene synthase activ     | 0.07 | 2   | 0.28011206 | 22   | 0.06353424  |
| 11787 | GO:0019842          | vitamin binding            | 0.07 | 7   | 0.98039216 | 177  | 0.5111618   |
| 23515 | GO:0048037          | cofactor binding           | 0.08 | 11  | 1.5406163  | 327  | 0.94434977  |
| 9811  | GO:0016757 GO:00169 | transferase activity, tran | 0.08 | 21  | 2.9411764  | 729  | 2.1052935   |
| 3291  | GO:0004657          | proline dehydrogenase      | 0.08 | 1   | 0.14005603 | 4    | 0.011551679 |
| 3834  | GO:0005395          | eye pigment precursor t    | 0.08 | 1   | 0.14005603 | 4    | 0.011551679 |
| 4325  | GO:0006089          | lactate metabolic proces   | 0.08 | 1   | 0.14005603 | 4    | 0.011551679 |
| 4345  | GO:0006113          | fermentation               | 0.08 | 1   | 0.14005603 | 4    | 0.011551679 |
| 6422  | GO:0009051          | pentose-phosphate shu      | 0.08 | 1   | 0.14005603 | 4    | 0.011551679 |
| 8459  | GO:0015018          | galactosylgalactosylxyl    | 0.08 | 1   | 0.14005603 | 4    | 0.011551679 |
| 11632 | GO:0019656          | glucose catabolic proce    | 0.08 | 1   | 0.14005603 | 4    | 0.011551679 |
| 11635 | GO:0019659          | glucose catabolic proce    | 0.08 | 1   | 0.14005603 | 4    | 0.011551679 |
| 11638 | GO:0019662          | non-glycolytic fermenta    | 0.08 | 1   | 0.14005603 | 4    | 0.011551679 |
| 16391 | GO:0034007          | S-linalool synthase activ  | 0.08 | 1   | 0.14005603 | 4    | 0.011551679 |
| 22893 | GO:0047405          | pyrimidine-5-nucleotide    | 0.08 | 1   | 0.14005603 | 4    | 0.011551679 |
| 24433 | GO:0050113          | inositol oxygenase activ   | 0.08 | 1   | 0.14005603 | 4    | 0.011551679 |
| 2753  | GO:0003919          | FMN adenylyltransferas     | 0.08 | 1   | 0.14005603 | 4    | 0.011551679 |
| 9779  | GO:0016717          | oxidoreductase activity,   | 0.09 | 2   | 0.28011206 | 24   | 0.06931008  |
| 31407 | GO:0080030          | methyl indole-3-acetate    | 0.09 | 2   | 0.28011206 | 24   | 0.06931008  |
| 3293  | GO:0004659          | prenyltransferase activi   | 0.09 | 3   | 0.42016807 | 51   | 0.14728391  |
| 9482  | GO:0016291 GO:00087 | acyl-CoA thioesterase a    | 0.09 | 2   | 0.28011206 | 25   | 0.072197996 |
| 31493 | GO:0080118          | brassinosteroid sulfotra   | 0.09 | 2   | 0.28011206 | 25   | 0.072197996 |
| 9750  | GO:0016679          | oxidoreductase activity,   | 0.10 | 3   | 0.42016807 | 53   | 0.15305975  |
| 5978  | GO:0008506          | sucrose:hydrogen symp      | 0.10 | 2   | 0.28011206 | 26   | 0.075085916 |
| 5987  | GO:0008515 GO:00191 | sucrose transmembran       | 0.10 | 2   | 0.28011206 | 26   | 0.075085916 |
| 8567  | GO:0015154          | disaccharide transmem      | 0.10 | 2   | 0.28011206 | 26   | 0.075085916 |
| 9035  | GO:0015766          | disaccharide transport     | 0.10 | 2   | 0.28011206 | 26   | 0.075085916 |
| 9039  | GO:0015770          | sucrose transport          | 0.10 | 2   | 0.28011206 | 26   | 0.075085916 |
| 17147 | GO:0034768          | (E)-beta-ocimene synth     | 0.10 | 2   | 0.28011206 | 26   | 0.075085916 |
| 4641  | GO:0006508          | proteolysis                | 0.10 | 26  | 3.6414566  | 965  | 2.7868426   |
| 8919  | GO:0015645          | fatty acid ligase activity | 0.11 | 2   | 0.28011206 | 27   | 0.077973835 |
| 3464  | GO:0004857          | enzyme inhibitor activity  | 0.11 | 6   | 0.84033614 | 157  | 0.4534034   |
| 119   | GO:0000151          | ubiquitin ligase complex   | 0.11 | 4   | 0.5602241  | 88   | 0.25413695  |
| 3260  | GO:0004620          | phospholipase activity     | 0.11 | 5   | 0.70028013 | 123  | 0.35521415  |
| 25626 | GO:0051336          | regulation of hydrolase    | 0.11 | 7   | 0.98039216 | 196  | 0.5660323   |
| 9813  | GO:0016759          | cellulose synthase activ   | 0.11 | 3   | 0.42016807 | 57   | 0.16461143  |
| 19758 | GO:0043492          | ATPase activity, couple    | 0.11 | 8   | 1.1204482  | 235  | 0.67866117  |
| 9870  | GO:0016830          | carbon-carbon lyase ac     | 0.12 | 6   | 0.84033614 | 161  | 0.4649551   |
| 3376  | GO:0004758          | serine C-palmitoyltransf   | 0.12 | 1   | 0.14005603 | 6    | 0.01732752  |
| 3845  | GO:0005452          | inorganic anion exchan     | 0.12 | 1   | 0.14005603 | 6    | 0.01732752  |
| 4375  | GO:0006165          | nucleoside diphosphate     | 0.12 | 1   | 0.14005603 | 6    | 0.01732752  |
| 5966  | GO:0008486          | diphosphoinositol-polyp    | 0.12 | 1   | 0.14005603 | 6    | 0.01732752  |
| 6000  | GO:0008531          | riboflavin kinase activity | 0.12 | 1   | 0.14005603 | 6    | 0.01732752  |
| 9572  | GO:0016454          | C-palmitoyltransferase a   | 0.12 | 1   | 0.14005603 | 6    | 0.01732752  |
| 9772  | GO:0016710          | trans-cinnamate 4-mon      | 0.12 | 1   | 0.14005603 | 6    | 0.01732752  |
| 11899 | GO:0019992          | diacylglycerol binding     | 0.12 | 1   | 0.14005603 | 6    | 0.01732752  |
| 19761 | GO:0043495          | protein anchor             | 0.12 | 1   | 0.14005603 | 6    | 0.01732752  |
| 3073  | GO:0004397          | histidine ammonia-lyase    | 0.12 | 1   | 0.14005603 | 6    | 0.01732752  |
| 3197  | GO:0004550          | nucleoside diphosphate     | 0.12 | 1   | 0.14005603 | 6    | 0.01732752  |
| 12741 | GO:0030170          | pyridoxal phosphate bin    | 0.12 | 5   | 0.70028013 | 126  | 0.3638779   |
| 28643 | GO:0070279          | vitamin B6 binding         | 0.12 | 5   | 0.70028013 | 126  | 0.3638779   |
| 2870  | GO:0004064          | arylesterase activity      | 0.13 | 2   | 0.28011206 | 30   | 0.086637594 |
| 28375 | GO:0070008          | serine-type exopeptidas    | 0.13 | 3   | 0.42016807 | 60   | 0.17327519  |
| 2980  | GO:0004185          | serine-type carboxypept    | 0.13 | 3   | 0.42016807 | 60   | 0.17327519  |
| 11712 | GO:0019748          | secondary metabolic pr     | 0.13 | 4   | 0.5602241  | 95   | 0.27435237  |
| 3255  | GO:0004615 GO:00089 | phosphomannomutase         | 0.14 | 1   | 0.14005603 | 7    | 0.020215439 |
| 16115 | GO:0033729          | anthocyanidin reductas     | 0.14 | 1   | 0.14005603 | 7    | 0.020215439 |
| 21149 | GO:0045548          | phenylalanine ammonia      | 0.14 | 1   | 0.14005603 | 7    | 0.020215439 |
| 2945  | GO:0004143          | diacylglycerol kinase ac   | 0.14 | 1   | 0.14005603 | 7    | 0.020215439 |
| 2978  | GO:0004180          | carboxypeptidase activi    | 0.14 | 3   | 0.42016807 | 62   | 0.17905103  |
| 6942  | GO:0009674          | potassium:sodium symp      | 0.14 | 2   | 0.28011206 | 32   | 0.09241343  |
| 9041  | GO:0015772          | oligosaccharide transp     | 0.14 | 2   | 0.28011206 | 32   | 0.09241343  |
| 12522 | GO:0022820          | potassium ion symporte     | 0.14 | 2   | 0.28011206 | 32   | 0.09241343  |
| 9600  | GO:0016491          | oxidoreductase activity    | 0.15 | 42  | 5.882353   | 1724 | 4.9787736   |
| 3356  | GO:0004737          | pyruvate decarboxylase     | 0.15 | 1   | 0.14005603 | 8    | 0.023103358 |
| 3402  | GO:0004791          | thioredoxin-disulfide red  | 0.15 | 1   | 0.14005603 | 8    | 0.023103358 |
| 5953  | GO:0008471          | laccase activity           | 0.15 | 1   | 0.14005603 | 8    | 0.023103358 |
| 6378  | GO:0008999          | ribosomal-protein-alanin   | 0.15 | 1   | 0.14005603 | 8    | 0.023103358 |
| 6497  | GO:0009132          | nucleoside diphosphate     | 0.15 | 1   | 0.14005603 | 8    | 0.023103358 |
| 7003  | GO:0009737          | response to abscisic ac    | 0.15 | 1   | 0.14005603 | 8    | 0.023103358 |
| 7168  | GO:0009916          | alternative oxidase activ  | 0.15 | 1   | 0.14005603 | 8    | 0.023103358 |
| 9680  | GO:0016595          | glutamate binding          | 0.15 | 1   | 0.14005603 | 8    | 0.023103358 |
| 11196 | GO:0019187          | beta-1,4-mannosyltrans     | 0.15 | 1   | 0.14005603 | 8    | 0.023103358 |
| 18639 | GO:0042284          | sphingolipid delta-4 des   | 0.15 | 1   | 0.14005603 | 8    | 0.023103358 |
| 26035 | GO:0051753          | mannan synthase activi     | 0.15 | 1   | 0.14005603 | 8    | 0.023103358 |
| 2988  | GO:0004300 GO:00169 | enoyl-CoA hydratase ad     | 0.15 | 1   | 0.14005603 | 8    | 0.023103358 |
| 9765  | GO:0016702          | oxidoreductase activity,   | 0.16 | 3   | 0.42016807 | 66   | 0.1906027   |
| 11829 | GO:0019900          | kinase binding             | 0.16 | 3   | 0.42016807 | 66   | 0.1906027   |
| 4942  | GO:0006855          | drug transmembrane tra     | 0.16 | 5   | 0.70028013 | 139  | 0.40142086  |
| 8642  | GO:0015238 GO:00152 | drug transmembrane tra     | 0.16 | 5   | 0.70028013 | 139  | 0.40142086  |
| 9154  | GO:0015893          | drug transport             | 0.16 | 5   | 0.70028013 | 139  | 0.40142086  |
| 18832 | GO:0042493 GO:00170 | response to drug           | 0.16 | 5   | 0.70028013 | 139  | 0.40142086  |
| 9480  | GO:0016289          | CoA hydrolase activity     | 0.16 | 2   | 0.28011206 | 35   | 0.10107719  |
| 11931 | GO:0020037          | heme binding               | 0.17 | 15  | 2.1008403  | 550  | 1.5883559   |
| 8749  | GO:0015399          | primary active transmem    | 0.17 | 8   | 1.1204482  | 260  | 0.75085914  |
| 8753  | GO:0015405          | P-P-bond-hydrolysis-dri    | 0.17 | 8   | 1.1204482  | 260  | 0.75085914  |
| 4079  | GO:0005795 GO:00169 | Golgi stack                | 0.17 | 1   | 0.14005603 | 9    | 0.025991278 |
| 20488 | GO:0044238          | primary metabolic proces   | 0.18 | 200 | 28.011204  | 9167 | 26.47356    |
| 9486  | GO:0016298          | lipase activity            | 0.18 | 6   | 0.84033614 | 185  | 0.53426516  |
| 9818  | GO:0016765 GO:00167 | transferase activity, tran | 0.18 | 6   | 0.84033614 | 185  | 0.53426516  |
| 5911  | GO:0008417          | fucosyltransferase activ   | 0.19 | 1   | 0.14005603 | 10   | 0.0288792   |
| 6464  | GO:0009095          | aromatic amino acid far    | 0.19 | 1   | 0.14005603 | 10   | 0.0288792   |
| 8727  | GO:0015369          | calcium:hydrogen antip     | 0.19 | 1   | 0.14005603 | 10   | 0.0288792   |
| 9741  | GO:0016668 GO:00166 | oxidoreductase activity,   | 0.19 | 1   | 0.14005603 | 10   | 0.0288792   |
| 23116 | GO:0047631          | ADP-ribose diphosphat      | 0.19 | 1   | 0.14005603 | 10   | 0.0288792   |
| 2797  | GO:0003979          | UDP-glucose 6-dehydry      | 0.19 | 1   | 0.14005603 | 10   | 0.0288792   |
| 4530  | GO:0006355 GO:00325 | regulation of transcripti  | 0.19 | 60  | 8.403361   | 2591 | 7.4826      |
| 3872  | GO:0005506          | iron ion binding           | 0.19 | 15  | 2.1008403  | 563  | 1.6258988   |
| 25544 | GO:0051252          | regulation of RNA meta     | 0.19 | 60  | 8.403361   | 2593 | 7.488376    |
| 20487 | GO:0044237          | cellular metabolic proces  | 0.19 | 179 | 25.070028  | 8185 | 23.637625   |
| 19393 | GO:0043086          | negative regulation of c   | 0.19 | 6   | 0.84033614 | 188  | 0.54292893  |
| 20342 | GO:0044092          | negative regulation of m   | 0.19 | 6   | 0.84033614 | 188  | 0.54292893  |
| 11426 | GO:0019438          | aromatic compound bio      | 0.20 | 5   | 0.70028013 | 149  | 0.43030006  |

|       |                     |                            |      |    |            |      |             |
|-------|---------------------|----------------------------|------|----|------------|------|-------------|
| 25510 | GO:0051213          | dioxygenase activity       | 0.20 | 3  | 0.42016807 | 75   | 0.21659398  |
| 7141  | GO:0009889          | regulation of biosynthesis | 0.20 | 60 | 8.403361   | 2605 | 7.523031    |
| 7772  | GO:0010556          | regulation of macromol     | 0.20 | 60 | 8.403361   | 2605 | 7.523031    |
| 13756 | GO:0031326          | regulation of cellular bio | 0.20 | 60 | 8.403361   | 2605 | 7.523031    |
| 32213 | GO:2000112          | regulation of cellular ma  | 0.20 | 60 | 8.403361   | 2605 | 7.523031    |
| 24968 | GO:0050662          | coenzyme binding           | 0.20 | 6  | 0.84033614 | 191  | 0.5515927   |
| 6288  | GO:0008891          | glycolate oxidase activit  | 0.20 | 1  | 0.14005603 | 11   | 0.03176712  |
| 11152 | GO:0019139 GO:00464 | cytokinin dehydrogenas     | 0.20 | 1  | 0.14005603 | 11   | 0.03176712  |
| 24696 | GO:0050378          | UDP-glucuronate 4-epim     | 0.20 | 1  | 0.14005603 | 11   | 0.03176712  |
| 2791  | GO:0003973          | (S)-2-hydroxy-acid oxid    | 0.20 | 1  | 0.14005603 | 11   | 0.03176712  |
| 9845  | GO:0016798          | hydrolase activity, actin  | 0.21 | 11 | 1.5406163  | 401  | 1.1580559   |
| 8461  | GO:0015020 GO:00039 | glucuronosyltransferase    | 0.21 | 2  | 0.28011206 | 42   | 0.121292636 |
| 3877  | GO:0005516          | calmodulin binding         | 0.22 | 7  | 0.98039216 | 236  | 0.6815491   |
| 9909  | GO:0016877          | ligase activity, forming c | 0.22 | 3  | 0.42016807 | 78   | 0.22525774  |
| 25436 | GO:0051139          | metal ion:hydrogen anti    | 0.22 | 1  | 0.14005603 | 12   | 0.03465504  |
| 31380 | GO:0080002          | UDP-glucose:4-aminob       | 0.22 | 1  | 0.14005603 | 12   | 0.03465504  |
| 11221 | GO:0019219          | regulation of nucleobas    | 0.22 | 61 | 8.543417   | 2675 | 7.7251854   |
| 25468 | GO:0051171          | regulation of nitrogen co  | 0.22 | 61 | 8.543417   | 2675 | 7.7251854   |
| 7692  | GO:0010468          | regulation of gene expr    | 0.23 | 60 | 8.403361   | 2635 | 7.6096687   |
| 9682  | GO:0016597          | amino acid binding         | 0.23 | 3  | 0.42016807 | 80   | 0.2310336   |
| 19479 | GO:0043176          | amine binding              | 0.23 | 3  | 0.42016807 | 80   | 0.2310336   |
| 13443 | GO:0030984          | kininogen binding          | 0.24 | 1  | 0.14005603 | 13   | 0.037542958 |
| 18582 | GO:0042221          | response to chemical st    | 0.24 | 9  | 1.2605042  | 328  | 0.94723773  |
| 12532 | GO:0022836          | gated channel activity     | 0.24 | 4  | 0.5602241  | 122  | 0.3523262   |
| 4912  | GO:0006813 GO:00154 | potassium ion transport    | 0.25 | 3  | 0.42016807 | 84   | 0.24258527  |
| 30168 | GO:0071804          | cellular potassium ion tr  | 0.25 | 3  | 0.42016807 | 84   | 0.24258527  |
| 30169 | GO:0071805          | potassium ion transmem     | 0.25 | 3  | 0.42016807 | 84   | 0.24258527  |
| 3048  | GO:0004364          | glutathione transferase    | 0.25 | 3  | 0.42016807 | 84   | 0.24258527  |
| 27228 | GO:0060255          | regulation of macromole    | 0.25 | 60 | 8.403361   | 2660 | 7.6818666   |
| 22409 | GO:0046906          | tetrapyrrole binding       | 0.25 | 15 | 2.1008403  | 596  | 1.7212002   |
| 8497  | GO:0015079 GO:00228 | potassium ion transmem     | 0.25 | 2  | 0.28011206 | 47   | 0.13573223  |
| 4670  | GO:0006541          | glutamine metabolic pro    | 0.25 | 1  | 0.14005603 | 14   | 0.040430877 |
| 6423  | GO:0009052          | pentose-phosphate shu      | 0.25 | 1  | 0.14005603 | 14   | 0.040430877 |
| 9399  | GO:0016174          | NAD(P)H oxidase activi     | 0.25 | 1  | 0.14005603 | 14   | 0.040430877 |
| 9879  | GO:0016841          | ammonia-lyase activity     | 0.25 | 1  | 0.14005603 | 14   | 0.040430877 |
| 11157 | GO:0019144          | ADP-sugar diphosphata      | 0.25 | 1  | 0.14005603 | 14   | 0.040430877 |
| 24970 | GO:0050664          | oxidoreductase activity,   | 0.25 | 1  | 0.14005603 | 14   | 0.040430877 |
| 2998  | GO:0004311          | farnesyltransferas         | 0.25 | 1  | 0.14005603 | 14   | 0.040430877 |
| 31465 | GO:0080090          | regulation of primary me   | 0.25 | 61 | 8.543417   | 2710 | 7.826263    |
| 9422  | GO:0016209          | antioxidant activity       | 0.25 | 5  | 0.70028013 | 165  | 0.47650677  |
| 5768  | GO:0008238          | exopeptidase activity      | 0.26 | 3  | 0.42016807 | 86   | 0.24836111  |
| 7074  | GO:0009815          | 1-aminocyclopropane-1      | 0.27 | 2  | 0.28011206 | 49   | 0.14150807  |
| 8909  | GO:0015630          | microtubule cytoskeleto    | 0.27 | 2  | 0.28011206 | 49   | 0.14150807  |
| 9725  | GO:0016645          | oxidoreductase activity,   | 0.27 | 2  | 0.28011206 | 49   | 0.14150807  |
| 3209  | GO:0004564          | beta-fructofuranosidase    | 0.27 | 1  | 0.14005603 | 15   | 0.043318797 |
| 9536  | GO:0016408          | C-acyltransferase activi   | 0.27 | 1  | 0.14005603 | 15   | 0.043318797 |
| 2868  | GO:0004062          | aryl sulfotransferase ac   | 0.27 | 1  | 0.14005603 | 15   | 0.043318797 |
| 21331 | GO:0045735          | nutrient reservoir activit | 0.28 | 3  | 0.42016807 | 89   | 0.25702485  |
| 3334  | GO:0004713 GO:00047 | protein tyrosine kinase 3  | 0.28 | 1  | 0.14005603 | 16   | 0.046206716 |
| 3742  | GO:0005242          | inward rectifier potassi   | 0.28 | 1  | 0.14005603 | 16   | 0.046206716 |
| 7521  | GO:0010295          | (+)-abscisic acid 8'-hydr  | 0.28 | 1  | 0.14005603 | 16   | 0.046206716 |
| 9878  | GO:0016840          | carbon-nitrogen lyase a    | 0.28 | 1  | 0.14005603 | 16   | 0.046206716 |
| 13435 | GO:0030976          | thiamine pyrophosphate     | 0.28 | 1  | 0.14005603 | 16   | 0.046206716 |
| 4135  | GO:0005875          | microtubule associated     | 0.30 | 1  | 0.14005603 | 17   | 0.049094636 |
| 4446  | GO:0006241          | CTP biosynthetic proces    | 0.30 | 1  | 0.14005603 | 17   | 0.049094636 |
| 6507  | GO:0009142          | nucleoside triphosphate    | 0.30 | 1  | 0.14005603 | 17   | 0.049094636 |
| 6513  | GO:0009148          | pyrimidine nucleoside tr   | 0.30 | 1  | 0.14005603 | 17   | 0.049094636 |
| 6565  | GO:0009201          | ribonucleoside triphosp    | 0.30 | 1  | 0.14005603 | 17   | 0.049094636 |
| 6572  | GO:0009208          | pyrimidine ribonucleosid   | 0.30 | 1  | 0.14005603 | 17   | 0.049094636 |
| 6573  | GO:0009209          | pyrimidine ribonucleosid   | 0.30 | 1  | 0.14005603 | 17   | 0.049094636 |
| 9930  | GO:0016899          | oxidoreductase activity,   | 0.30 | 1  | 0.14005603 | 17   | 0.049094636 |
| 18738 | GO:0042389          | omega-3 fatty acid desa    | 0.30 | 1  | 0.14005603 | 17   | 0.049094636 |
| 21602 | GO:0046036 GO:00062 | CTP metabolic process      | 0.30 | 1  | 0.14005603 | 17   | 0.049094636 |
| 3242  | GO:0004601 GO:00166 | peroxidase activity        | 0.30 | 4  | 0.5602241  | 135  | 0.38986918  |
| 9754  | GO:0016684          | oxidoreductase activity,   | 0.30 | 4  | 0.5602241  | 135  | 0.38986918  |
| 12533 | GO:0022838          | substrate-specific chan    | 0.31 | 6  | 0.84033614 | 221  | 0.63823026  |
| 17918 | GO:0035556 GO:00072 | intracellular signal trans | 0.31 | 2  | 0.28011206 | 54   | 0.15594767  |
| 3239  | GO:0004596          | peptide alpha-N-acetyl     | 0.31 | 1  | 0.14005603 | 18   | 0.051982556 |
| 4134  | GO:0005874          | microtubule                | 0.31 | 1  | 0.14005603 | 18   | 0.051982556 |
| 5776  | GO:0008252          | nucleotidase activity      | 0.31 | 1  | 0.14005603 | 18   | 0.051982556 |
| 10899 | GO:0018858          | benzoate-CoA ligase ac     | 0.31 | 1  | 0.14005603 | 18   | 0.051982556 |
| 16595 | GO:0034212          | peptide N-acetyltransfe    | 0.31 | 1  | 0.14005603 | 18   | 0.051982556 |
| 13753 | GO:0031323          | regulation of cellular me  | 0.31 | 61 | 8.543417   | 2770 | 7.999538    |
| 26845 | GO:0052689          | carboxylic ester hydrola   | 0.32 | 13 | 1.8207283  | 538  | 1.5537009   |
| 8660  | GO:0015267 GO:00152 | channel activity           | 0.32 | 6  | 0.84033614 | 226  | 0.6526699   |
| 12515 | GO:0022803          | passive transmembrane      | 0.32 | 6  | 0.84033614 | 226  | 0.6526699   |
| 19887 | GO:0043621          | protein self-association   | 0.33 | 1  | 0.14005603 | 19   | 0.054870475 |
| 3724  | GO:0005216          | ion channel activity       | 0.33 | 4  | 0.5602241  | 140  | 0.40430877  |
| 13829 | GO:0031406          | carboxylic acid binding    | 0.33 | 3  | 0.42016807 | 98   | 0.28301615  |
| 4844  | GO:0006725          | cellular aromatic compo    | 0.33 | 5  | 0.70028013 | 185  | 0.53426516  |
| 3323  | GO:0004702          | receptor signaling prote   | 0.34 | 2  | 0.28011206 | 58   | 0.16749935  |
| 3328  | GO:0004707 GO:00083 | MAP kinase activity        | 0.34 | 1  | 0.14005603 | 20   | 0.0577584   |
| 6201  | GO:0008794          | arsenate reductase (glu    | 0.34 | 1  | 0.14005603 | 20   | 0.0577584   |
| 8726  | GO:0015368          | calcium:cation antiporte   | 0.34 | 1  | 0.14005603 | 20   | 0.0577584   |
| 13086 | GO:0030611          | arsenate reductase acti    | 0.34 | 1  | 0.14005603 | 20   | 0.0577584   |
| 13088 | GO:0030613          | oxidoreductase activity,   | 0.34 | 1  | 0.14005603 | 20   | 0.0577584   |
| 13089 | GO:0030614          | oxidoreductase activity,   | 0.34 | 1  | 0.14005603 | 20   | 0.0577584   |
| 30700 | GO:0072341          | modified amino acid bin    | 0.34 | 2  | 0.28011206 | 59   | 0.17038727  |
| 4526  | GO:0006351 GO:00063 | transcription, DNA-depe    | 0.35 | 35 | 4.901961   | 1575 | 4.548474    |
| 15176 | GO:0032774          | RNA biosynthetic proces    | 0.35 | 35 | 4.901961   | 1575 | 4.548474    |
| 4420  | GO:0006213          | pyrimidine nucleoside n    | 0.35 | 1  | 0.14005603 | 21   | 0.060646318 |
| 6582  | GO:0009218          | pyrimidine ribonucleotid   | 0.35 | 1  | 0.14005603 | 21   | 0.060646318 |
| 6584  | GO:0009220          | pyrimidine ribonucleotid   | 0.35 | 1  | 0.14005603 | 21   | 0.060646318 |
| 9902  | GO:0016868 GO:00167 | intramolecular transfera   | 0.35 | 1  | 0.14005603 | 21   | 0.060646318 |
| 21697 | GO:0046131          | pyrimidine ribonucleosid   | 0.35 | 1  | 0.14005603 | 21   | 0.060646318 |
| 8526  | GO:0015112          | nitrate transmembrane      | 0.36 | 2  | 0.28011206 | 61   | 0.1761631   |
| 8975  | GO:0015706 GO:00068 | nitrate transport          | 0.36 | 2  | 0.28011206 | 61   | 0.1761631   |
| 12516 | GO:0022804          | active transmembrane t     | 0.36 | 18 | 2.5210085  | 787  | 2.2727928   |
| 8489  | GO:0015066          | alpha-amylase inhibitor    | 0.37 | 1  | 0.14005603 | 22   | 0.06353424  |
| 10032 | GO:0017075          | syntaxin-1 binding         | 0.37 | 1  | 0.14005603 | 22   | 0.06353424  |
| 11224 | GO:0019222          | regulation of metabolic    | 0.38 | 67 | 9.383754   | 3115 | 8.995871    |
| 6512  | GO:0009147          | pyrimidine nucleoside tr   | 0.38 | 1  | 0.14005603 | 23   | 0.06642216  |
| 7052  | GO:0009790 GO:00097 | embryo development         | 0.38 | 1  | 0.14005603 | 23   | 0.06642216  |
| 9806  | GO:0016752          | sinapoyltransferase acti   | 0.38 | 1  | 0.14005603 | 23   | 0.06642216  |
| 9807  | GO:0016753          | O-sinapoyltransferase a    | 0.38 | 1  | 0.14005603 | 23   | 0.06642216  |
| 9808  | GO:0016754          | sinapoylglucose-malate     | 0.38 | 1  | 0.14005603 | 23   | 0.06642216  |
| 9710  | GO:0016628          | oxidoreductase activity,   | 0.39 | 2  | 0.28011206 | 65   | 0.18771479  |



|       |                     |                            |      |    |            |      |             |
|-------|---------------------|----------------------------|------|----|------------|------|-------------|
| 9838  | GO:0016790          | thiolester hydrolase acti  | 0.39 | 2  | 0.28011206 | 65   | 0.18771479  |
| 6424  | GO:0009055 GO:00090 | electron carrier activity  | 0.39 | 4  | 0.5602241  | 154  | 0.44473964  |
| 3213  | GO:0004568          | chitinase activity         | 0.39 | 1  | 0.14005603 | 24   | 0.06931008  |
| 3262  | GO:0004622 GO:00451 | lysophospholipase activ    | 0.39 | 1  | 0.14005603 | 24   | 0.06931008  |
| 6248  | GO:0008843          | endochitinase activity     | 0.39 | 1  | 0.14005603 | 24   | 0.06931008  |
| 13657 | GO:0031225          | anchored to membrane       | 0.39 | 1  | 0.14005603 | 24   | 0.06931008  |
| 22440 | GO:0046939          | nucleotide phosphorylat    | 0.39 | 1  | 0.14005603 | 24   | 0.06931008  |
| 25578 | GO:0051287 GO:00512 | NAD binding                | 0.39 | 1  | 0.14005603 | 24   | 0.06931008  |
| 6824  | GO:0009536          | plastid                    | 0.40 | 6  | 0.84033614 | 247  | 0.7133162   |
| 4331  | GO:0006098          | pentose-phosphate shu      | 0.41 | 1  | 0.14005603 | 25   | 0.072197996 |
| 4855  | GO:0006739          | NADP metabolic proces      | 0.41 | 1  | 0.14005603 | 25   | 0.072197996 |
| 4856  | GO:0006740          | NADPH regeneration         | 0.41 | 1  | 0.14005603 | 25   | 0.072197996 |
| 9846  | GO:0016799          | hydrolase activity, hydro  | 0.41 | 1  | 0.14005603 | 25   | 0.072197996 |
| 21145 | GO:0045543          | gibberellin 2-beta-dioxy   | 0.41 | 1  | 0.14005603 | 25   | 0.072197996 |
| 125   | GO:0000159          | protein phosphatase typ    | 0.41 | 1  | 0.14005603 | 25   | 0.072197996 |
| 3620  | GO:0005057          | receptor signaling prote   | 0.42 | 2  | 0.28011206 | 69   | 0.19926646  |
| 9722  | GO:0016641          | oxidoreductase activity,   | 0.42 | 2  | 0.28011206 | 69   | 0.19926646  |
| 3210  | GO:0004565          | beta-galactosidase acti    | 0.42 | 1  | 0.14005603 | 26   | 0.075085916 |
| 4030  | GO:0005741          | mitochondrial outer mer    | 0.42 | 1  | 0.14005603 | 26   | 0.075085916 |
| 9421  | GO:0016208          | AMP binding                | 0.42 | 1  | 0.14005603 | 26   | 0.075085916 |
| 20625 | GO:0044431          | Golgi apparatus part       | 0.42 | 1  | 0.14005603 | 26   | 0.075085916 |
| 3725  | GO:0005217          | intracellular ligand-gate  | 0.43 | 1  | 0.14005603 | 27   | 0.077973835 |
| 6433  | GO:0009064          | glutamine family amino     | 0.43 | 1  | 0.14005603 | 27   | 0.077973835 |
| 9771  | GO:0016709          | oxidoreductase activity,   | 0.43 | 2  | 0.28011206 | 71   | 0.2050423   |
| 3744  | GO:0005244          | voltage-gated ion chann    | 0.44 | 2  | 0.28011206 | 72   | 0.20793022  |
| 12528 | GO:0022832          | voltage-gated channel a    | 0.44 | 2  | 0.28011206 | 72   | 0.20793022  |
| 15280 | GO:0032879          | regulation of localizati   | 0.44 | 2  | 0.28011206 | 72   | 0.20793022  |
| 17141 | GO:0034762          | regulation of transmem     | 0.44 | 2  | 0.28011206 | 72   | 0.20793022  |
| 17144 | GO:0034765          | regulation of ion transm   | 0.44 | 2  | 0.28011206 | 72   | 0.20793022  |
| 19568 | GO:0043269          | regulation of ion transp   | 0.44 | 2  | 0.28011206 | 72   | 0.20793022  |
| 25348 | GO:0051049          | regulation of transport    | 0.44 | 2  | 0.28011206 | 72   | 0.20793022  |
| 24966 | GO:0050660          | flavin adenine dinucleot   | 0.44 | 3  | 0.42016807 | 118  | 0.34077454  |
| 3284  | GO:0004850          | polygalacturonase activ    | 0.44 | 1  | 0.14005603 | 28   | 0.080861755 |
| 9238  | GO:0015980          | energy derivation by ox    | 0.44 | 1  | 0.14005603 | 28   | 0.080861755 |
| 9827  | GO:0016776          | phosphotransferase act     | 0.44 | 1  | 0.14005603 | 28   | 0.080861755 |
| 13634 | GO:0031177          | phosphopantetheine bir     | 0.44 | 1  | 0.14005603 | 28   | 0.080861755 |
| 139   | GO:0000175          | 3'-5'-exoribonuclease ad   | 0.44 | 1  | 0.14005603 | 28   | 0.080861755 |
| 2833  | GO:0004024          | alcohol dehydrogenase      | 0.44 | 1  | 0.14005603 | 28   | 0.080861755 |
| 25195 | GO:0050896 GO:00518 | response to stimulus       | 0.44 | 40 | 5.602241   | 1881 | 5.432177    |
| 9703  | GO:0016620          | oxidoreductase activity,   | 0.45 | 2  | 0.28011206 | 73   | 0.21081814  |
| 20531 | GO:0044281          | small molecule metabol     | 0.45 | 38 | 5.322129   | 1788 | 5.1636004   |
| 5766  | GO:0008236          | serine-type peptidase a    | 0.45 | 5  | 0.70028013 | 214  | 0.6180149   |
| 4427  | GO:0006221          | pyrimidine nucleotide bi   | 0.45 | 1  | 0.14005603 | 29   | 0.083749674 |
| 11834 | GO:0019905          | syntaxin binding           | 0.45 | 1  | 0.14005603 | 29   | 0.083749674 |
| 20887 | GO:0045263          | proton-transporting ATP    | 0.45 | 1  | 0.14005603 | 29   | 0.083749674 |
| 3310  | GO:0004679          | AMP-activated protein k    | 0.46 | 1  | 0.14005603 | 30   | 0.086637594 |
| 8683  | GO:0015301 GO:00153 | anion:anion antiporter a   | 0.46 | 1  | 0.14005603 | 30   | 0.086637594 |
| 23    | GO:0000030          | mannosyltransferase ac     | 0.46 | 1  | 0.14005603 | 30   | 0.086637594 |
| 2774  | GO:0003950          | NAD+ ADP-ribosyltrans      | 0.46 | 1  | 0.14005603 | 30   | 0.086637594 |
| 6899  | GO:0009628          | response to abiotic stim   | 0.47 | 4  | 0.5602241  | 170  | 0.49094638  |
| 11202 | GO:0019199          | transmembrane recepto      | 0.47 | 11 | 1.5406163  | 504  | 1.4555116   |
| 716   | GO:0001071          | nucleic acid binding tra   | 0.47 | 30 | 4.2016807  | 1417 | 4.0921826   |
| 2643  | GO:0003700 GO:00001 | sequence-specific DNA      | 0.47 | 30 | 4.2016807  | 1417 | 4.0921826   |
| 4078  | GO:0005794          | Golgi apparatus            | 0.48 | 1  | 0.14005603 | 31   | 0.08952551  |
| 14422 | GO:0032012          | regulation of ARF prote    | 0.48 | 1  | 0.14005603 | 31   | 0.08952551  |
| 14720 | GO:0032312          | regulation of ARF GTPa     | 0.48 | 1  | 0.14005603 | 31   | 0.08952551  |
| 19590 | GO:0043295          | glutathione binding        | 0.48 | 1  | 0.14005603 | 31   | 0.08952551  |
| 22019 | GO:0046496          | nicotinamide nucleotide    | 0.48 | 1  | 0.14005603 | 31   | 0.08952551  |
| 30884 | GO:0072528          | pyrimidine-containing co   | 0.48 | 1  | 0.14005603 | 31   | 0.08952551  |
| 10103 | GO:0017171          | serine hydrolase activity  | 0.48 | 5  | 0.70028013 | 220  | 0.63534236  |
| 8675  | GO:0015293          | symporter activity         | 0.48 | 4  | 0.5602241  | 173  | 0.49961013  |
| 4121  | GO:0005856          | cytoskeleton               | 0.48 | 3  | 0.42016807 | 126  | 0.3638779   |
| 22049 | GO:0046527          | glucosyltransferase acti   | 0.48 | 6  | 0.84033614 | 270  | 0.77973837  |
| 3265  | GO:0004630          | phospholipase D activity   | 0.49 | 1  | 0.14005603 | 32   | 0.09241343  |
| 3717  | GO:0005199          | structural constituent of  | 0.49 | 1  | 0.14005603 | 32   | 0.09241343  |
| 3785  | GO:0005315 GO:00053 | inorganic phosphate tra    | 0.49 | 1  | 0.14005603 | 32   | 0.09241343  |
| 4510  | GO:0006323          | DNA packaging              | 0.49 | 1  | 0.14005603 | 32   | 0.09241343  |
| 4514  | GO:0006334          | nucleosome assembly        | 0.49 | 1  | 0.14005603 | 32   | 0.09241343  |
| 9537  | GO:0016409          | palmitoyltransferase act   | 0.49 | 1  | 0.14005603 | 32   | 0.09241343  |
| 9927  | GO:0016896          | exoribonuclease activity   | 0.49 | 1  | 0.14005603 | 32   | 0.09241343  |
| 13920 | GO:0031497          | chromatin assembly or d    | 0.49 | 1  | 0.14005603 | 32   | 0.09241343  |
| 14381 | GO:0031968          | organelle outer membra     | 0.49 | 1  | 0.14005603 | 32   | 0.09241343  |
| 17107 | GO:0034728          | nucleosome organizatio     | 0.49 | 1  | 0.14005603 | 32   | 0.09241343  |
| 28361 | GO:0065004          | protein-DNA complex as     | 0.49 | 1  | 0.14005603 | 32   | 0.09241343  |
| 29467 | GO:0071103          | DNA conformation chan      | 0.49 | 1  | 0.14005603 | 32   | 0.09241343  |
| 30188 | GO:0071824          | protein-DNA complex su     | 0.49 | 1  | 0.14005603 | 32   | 0.09241343  |
| 3190  | GO:0004532          | exoribonuclease activity   | 0.49 | 1  | 0.14005603 | 32   | 0.09241343  |
| 3827  | GO:0005372          | water transmembrane tr     | 0.50 | 2  | 0.28011206 | 81   | 0.23392151  |
| 4927  | GO:0006833          | water transport            | 0.50 | 2  | 0.28011206 | 81   | 0.23392151  |
| 8652  | GO:0015250          | water channel activity     | 0.50 | 2  | 0.28011206 | 81   | 0.23392151  |
| 15189 | GO:0032787          | monocarboxylic acid me     | 0.50 | 2  | 0.28011206 | 81   | 0.23392151  |
| 18429 | GO:0042044          | fluid transport            | 0.50 | 2  | 0.28011206 | 81   | 0.23392151  |
| 4849  | GO:0006730 GO:00197 | one-carbon metabolic p     | 0.51 | 7  | 0.98039216 | 325  | 0.93857396  |
| 3749  | GO:0005249          | voltage-gated potassiur    | 0.51 | 1  | 0.14005603 | 34   | 0.09818927  |
| 5270  | GO:0007264          | small GTPase mediated      | 0.51 | 1  | 0.14005603 | 34   | 0.09818927  |
| 5827  | GO:0008308 GO:00228 | voltage-gated anion cha    | 0.51 | 1  | 0.14005603 | 34   | 0.09818927  |
| 6486  | GO:0009119          | ribonucleoside metaboli    | 0.51 | 1  | 0.14005603 | 34   | 0.09818927  |
| 11208 | GO:0019205          | nucleobase, nucleoside     | 0.51 | 1  | 0.14005603 | 34   | 0.09818927  |
| 11831 | GO:0019902          | phosphatase binding        | 0.51 | 1  | 0.14005603 | 34   | 0.09818927  |
| 11832 | GO:0019903          | protein phosphatase bir    | 0.51 | 1  | 0.14005603 | 34   | 0.09818927  |
| 20321 | GO:0044070          | regulation of anion trans  | 0.51 | 1  | 0.14005603 | 34   | 0.09818927  |
| 6166  | GO:0008757          | S-adenosylmethionine-d     | 0.51 | 4  | 0.5602241  | 180  | 0.5198256   |
| 6796  | GO:0009507          | chloroplast                | 0.51 | 5  | 0.70028013 | 229  | 0.6613336   |
| 3490  | GO:0004888 GO:00049 | transmembrane recepto      | 0.51 | 12 | 1.6806723  | 571  | 1.6490022   |
| 4426  | GO:0006220          | pyrimidine nucleotide m    | 0.52 | 1  | 0.14005603 | 35   | 0.10107719  |
| 6355  | GO:0008970          | phospholipase A1 activi    | 0.52 | 1  | 0.14005603 | 35   | 0.10107719  |
| 21146 | GO:0045544          | gibberellin 20-oxidase a   | 0.52 | 1  | 0.14005603 | 35   | 0.10107719  |
| 23199 | GO:0047714          | galactolipase activity     | 0.52 | 1  | 0.14005603 | 35   | 0.10107719  |
| 4513  | GO:0006333          | chromatin assembly or d    | 0.53 | 1  | 0.14005603 | 36   | 0.10396511  |
| 5902  | GO:0008408          | 3'-5' exoribonuclease acti | 0.53 | 1  | 0.14005603 | 36   | 0.10396511  |
| 9185  | GO:0015925          | galactosidase activity     | 0.53 | 1  | 0.14005603 | 36   | 0.10396511  |
| 11314 | GO:0019321          | pentose metabolic proc     | 0.53 | 1  | 0.14005603 | 36   | 0.10396511  |
| 3758  | GO:0005267          | potassium channel activ    | 0.54 | 1  | 0.14005603 | 37   | 0.10685303  |
| 9193  | GO:0015934          | large ribosomal subunit    | 0.54 | 1  | 0.14005603 | 37   | 0.10685303  |
| 11355 | GO:0019362          | pyridine nucleotide meta   | 0.54 | 1  | 0.14005603 | 37   | 0.10685303  |
| 30880 | GO:0072524          | pyridine-containing com    | 0.54 | 1  | 0.14005603 | 37   | 0.10685303  |
| 20624 | GO:0044430          | cytoskeletal part          | 0.54 | 2  | 0.28011206 | 88   | 0.25413695  |

|       |                     |                            |      |    |            |      |             |
|-------|---------------------|----------------------------|------|----|------------|------|-------------|
| 8501  | GO:0015085          | calcium ion transmembr     | 0.55 | 1  | 0.14005603 | 38   | 0.10974095  |
| 12538 | GO:0022843          | voltage-gated cation ch    | 0.55 | 1  | 0.14005603 | 38   | 0.10974095  |
| 117   | GO:000149           | SNARE binding              | 0.55 | 1  | 0.14005603 | 38   | 0.10974095  |
| 2628  | GO:0003677          | DNA binding                | 0.55 | 25 | 3.5014005  | 1224 | 3.534814    |
| 9719  | GO:0016638          | oxidoreductase activity,   | 0.55 | 2  | 0.28011206 | 89   | 0.25702485  |
| 6623  | GO:0009260          | ribonucleotide biosynthe   | 0.56 | 1  | 0.14005603 | 39   | 0.11262887  |
| 30883 | GO:0072527          | pyrimidine-containing co   | 0.56 | 1  | 0.14005603 | 39   | 0.11262887  |
| 4408  | GO:0006200          | ATP catabolic process      | 0.56 | 13 | 1.8207283  | 641  | 1.8511566   |
| 9918  | GO:0016887 GO:00040 | ATPase activity            | 0.56 | 13 | 1.8207283  | 641  | 1.8511566   |
| 21600 | GO:0046034          | ATP metabolic process      | 0.56 | 13 | 1.8207283  | 641  | 1.8511566   |
| 9697  | GO:0016614          | oxidoreductase activity,   | 0.56 | 6  | 0.84033614 | 293  | 0.84616053  |
| 4058  | GO:0005773          | vacuole                    | 0.57 | 1  | 0.14005603 | 40   | 0.1155168   |
| 5891  | GO:0008395 GO:00083 | steroid hydroxylase acti   | 0.57 | 1  | 0.14005603 | 40   | 0.1155168   |
| 9843  | GO:0016796          | exonuclease activity, ac   | 0.57 | 1  | 0.14005603 | 40   | 0.1155168   |
| 11804 | GO:0019867          | outer membrane             | 0.57 | 1  | 0.14005603 | 40   | 0.1155168   |
| 5712  | GO:0008168 GO:00044 | methyltransferase activi   | 0.57 | 5  | 0.70028013 | 244  | 0.7046524   |
| 2897  | GO:004091 GO:00043  | carboxylesterase activit   | 0.57 | 4  | 0.5602241  | 194  | 0.5602564   |
| 5981  | GO:0008509          | anion transmembrane tr     | 0.57 | 5  | 0.70028013 | 245  | 0.70754033  |
| 4851  | GO:0006733          | oxidoreduction coenzym     | 0.57 | 1  | 0.14005603 | 41   | 0.118404716 |
| 25098 | GO:0050794 GO:00512 | regulation of cellular pro | 0.57 | 81 | 11.344538  | 3987 | 11.514136   |
| 4917  | GO:0006820 GO:00068 | anion transport            | 0.58 | 5  | 0.70028013 | 247  | 0.7133162   |
| 3808  | GO:0005351 GO:00054 | sugar:hydrogen symport     | 0.58 | 2  | 0.28011206 | 94   | 0.27146447  |
| 3835  | GO:0005402          | cation:sugar symporter     | 0.58 | 2  | 0.28011206 | 94   | 0.27146447  |
| 3753  | GO:0005253          | anion channel activity     | 0.58 | 1  | 0.14005603 | 42   | 0.121292636 |
| 4756  | GO:0006631          | fatty acid metabolic pro   | 0.58 | 1  | 0.14005603 | 42   | 0.121292636 |
| 9801  | GO:0016747          | transferase activity, tran | 0.60 | 9  | 1.2605042  | 456  | 1.3168914   |
| 4914  | GO:0006816          | calcium ion transport      | 0.60 | 1  | 0.14005603 | 44   | 0.12706847  |
| 6822  | GO:0009534          | chloroplast thylakoid      | 0.60 | 1  | 0.14005603 | 44   | 0.12706847  |
| 6823  | GO:0009535          | chloroplast thylakoid me   | 0.60 | 1  | 0.14005603 | 44   | 0.12706847  |
| 14388 | GO:0031976          | plastid thylakoid          | 0.60 | 1  | 0.14005603 | 44   | 0.12706847  |
| 14395 | GO:0031984          | organelle subcompartment   | 0.60 | 1  | 0.14005603 | 44   | 0.12706847  |
| 26883 | GO:0055035          | plastid thylakoid membr    | 0.60 | 1  | 0.14005603 | 44   | 0.12706847  |
| 28952 | GO:0070588          | calcium ion transmembr     | 0.60 | 1  | 0.14005603 | 44   | 0.12706847  |
| 8677  | GO:0015295          | solute:hydrogen symport    | 0.60 | 2  | 0.28011206 | 98   | 0.28301615  |
| 8681  | GO:0015299          | solute:hydrogen antipor    | 0.60 | 2  | 0.28011206 | 98   | 0.28301615  |
| 8673  | GO:0015291 GO:00152 | secondary active transp    | 0.60 | 8  | 1.1204482  | 407  | 1.1753833   |
| 25094 | GO:0050789 GO:00507 | regulation of biological p | 0.61 | 87 | 12.184874  | 4315 | 12.461374   |
| 9893  | GO:0016857          | racemase and epimeras      | 0.61 | 1  | 0.14005603 | 45   | 0.1299564   |
| 14726 | GO:0032318          | regulation of Ras GTPa     | 0.61 | 1  | 0.14005603 | 45   | 0.1299564   |
| 17001 | GO:0034622          | cellular macromolecula     | 0.61 | 1  | 0.14005603 | 45   | 0.1299564   |
| 22096 | GO:0046578          | regulation of Ras protei   | 0.61 | 1  | 0.14005603 | 45   | 0.1299564   |
| 25355 | GO:0051056          | regulation of small GTP    | 0.61 | 1  | 0.14005603 | 45   | 0.1299564   |
| 28360 | GO:0065003          | macromolecular comple      | 0.61 | 1  | 0.14005603 | 45   | 0.1299564   |
| 8679  | GO:0015297          | antiporter activity        | 0.61 | 3  | 0.42016807 | 152  | 0.4389638   |
| 8682  | GO:0015300          | solute:solute antiporter   | 0.61 | 3  | 0.42016807 | 152  | 0.4389638   |
| 4073  | GO:0005789          | endoplasmic reticulum r    | 0.62 | 1  | 0.14005603 | 46   | 0.13284431  |
| 18536 | GO:0042175          | nuclear outer membran      | 0.62 | 1  | 0.14005603 | 46   | 0.13284431  |
| 20626 | GO:0044432          | endoplasmic reticulum p    | 0.62 | 1  | 0.14005603 | 46   | 0.13284431  |
| 8517  | GO:0015103          | inorganic anion transme    | 0.62 | 3  | 0.42016807 | 154  | 0.44473964  |
| 5280  | GO:0007275          | multicellular organismal   | 0.62 | 2  | 0.28011206 | 101  | 0.2916799   |
| 5807  | GO:0008287          | protein serine/threonine   | 0.62 | 1  | 0.14005603 | 47   | 0.13573223  |
| 6442  | GO:0009073 GO:00160 | aromatic amino acid fan    | 0.62 | 1  | 0.14005603 | 47   | 0.13573223  |
| 21943 | GO:0046417          | chorismate metabolic pr    | 0.62 | 1  | 0.14005603 | 47   | 0.13573223  |
| 9796  | GO:0016741          | transferase activity, tran | 0.63 | 5  | 0.70028013 | 261  | 0.7537471   |
| 14591 | GO:0032183          | SUMO binding               | 0.63 | 1  | 0.14005603 | 48   | 0.13862015  |
| 28930 | GO:0070566          | adenylyltransferase acti   | 0.63 | 1  | 0.14005603 | 48   | 0.13862015  |
| 9709  | GO:0016627          | oxidoreductase activity,   | 0.64 | 2  | 0.28011206 | 104  | 0.30034366  |
| 19831 | GO:0043565          | sequence-specific DNA      | 0.64 | 3  | 0.42016807 | 159  | 0.45917925  |
| 3756  | GO:0005261 GO:00152 | cation channel activity    | 0.64 | 1  | 0.14005603 | 49   | 0.14150807  |
| 6483  | GO:0009116          | nucleoside metabolic pr    | 0.64 | 1  | 0.14005603 | 49   | 0.14150807  |
| 11830 | GO:0019901          | protein kinase binding     | 0.64 | 1  | 0.14005603 | 49   | 0.14150807  |
| 31421 | GO:0080044          | quercetin 7-O-glucosyltr   | 0.64 | 1  | 0.14005603 | 49   | 0.14150807  |
| 19126 | GO:0042803          | protein homodimerizatio    | 0.64 | 5  | 0.70028013 | 265  | 0.7652988   |
| 14909 | GO:0032501 GO:00508 | multicellular organismal   | 0.64 | 2  | 0.28011206 | 105  | 0.3032316   |
| 2668  | GO:0003779          | actin binding              | 0.64 | 2  | 0.28011206 | 105  | 0.3032316   |
| 9795  | GO:0016740          | transferase activity       | 0.64 | 75 | 10.504202  | 3764 | 10.870131   |
| 8495  | GO:0015077          | monovalent inorganic ca    | 0.65 | 4  | 0.5602241  | 214  | 0.6180149   |
| 5096  | GO:0007047          | cellular cell wall organiz | 0.65 | 1  | 0.14005603 | 50   | 0.14439599  |
| 6932  | GO:0009664          | plant-type cell wall orga  | 0.65 | 1  | 0.14005603 | 50   | 0.14439599  |
| 19914 | GO:0043648          | dicarboxylic acid metab    | 0.65 | 1  | 0.14005603 | 50   | 0.14439599  |
| 20857 | GO:0045229          | external encapsulating s   | 0.65 | 1  | 0.14005603 | 50   | 0.14439599  |
| 30033 | GO:0071669          | plant-type cell wall orga  | 0.65 | 1  | 0.14005603 | 50   | 0.14439599  |
| 3185  | GO:0004527 GO:00088 | exonuclease activity       | 0.65 | 1  | 0.14005603 | 50   | 0.14439599  |
| 7213  | GO:0009966 GO:00354 | regulation of signal tran  | 0.65 | 1  | 0.14005603 | 51   | 0.14728391  |
| 9975  | GO:0016998          | cell wall macromolecul     | 0.65 | 1  | 0.14005603 | 51   | 0.14728391  |
| 12492 | GO:0022807          | cellular component asse    | 0.65 | 1  | 0.14005603 | 51   | 0.14728391  |
| 12601 | GO:0023051          | regulation of signaling    | 0.65 | 1  | 0.14005603 | 51   | 0.14728391  |
| 30208 | GO:0071844          | cellular component asse    | 0.65 | 1  | 0.14005603 | 51   | 0.14728391  |
| 3099  | GO:0004428          | inositol or phosphatidyl   | 0.65 | 1  | 0.14005603 | 51   | 0.14728391  |
| 28364 | GO:0065007          | biological regulation      | 0.66 | 87 | 12.184874  | 4376 | 12.637537   |
| 4915  | GO:0006817          | phosphate transport        | 0.66 | 1  | 0.14005603 | 52   | 0.15017183  |
| 8528  | GO:0015114          | phosphate transmembra      | 0.66 | 1  | 0.14005603 | 52   | 0.15017183  |
| 17801 | GO:0035435          | phosphate transmembra      | 0.66 | 1  | 0.14005603 | 52   | 0.15017183  |
| 20287 | GO:0044036          | cell wall macromolecul     | 0.66 | 1  | 0.14005603 | 52   | 0.15017183  |
| 6563  | GO:0009199          | ribonucleoside triphosp    | 0.66 | 15 | 2.1008403  | 790  | 2.2814567   |
| 29246 | GO:0070882          | cellular cell wall organiz | 0.67 | 1  | 0.14005603 | 53   | 0.15305975  |
| 18953 | GO:0042623          | ATPase activity, couple    | 0.67 | 10 | 1.4005603  | 537  | 1.550813    |
| 6506  | GO:0009141          | nucleoside triphosphate    | 0.67 | 15 | 2.1008403  | 796  | 2.2987843   |
| 8680  | GO:0015298          | solute:cation antiporter   | 0.67 | 2  | 0.28011206 | 112  | 0.32344702  |
| 9730  | GO:0016651          | oxidoreductase activity,   | 0.67 | 2  | 0.28011206 | 112  | 0.32344702  |
| 29918 | GO:0071554          | cell wall organization or  | 0.67 | 2  | 0.28011206 | 112  | 0.32344702  |
| 8943  | GO:0015672          | monovalent inorganic ca    | 0.68 | 7  | 0.98039216 | 383  | 1.1060733   |
| 9933  | GO:0016903          | oxidoreductase activity,   | 0.68 | 2  | 0.28011206 | 113  | 0.32633495  |
| 9533  | GO:0016405          | CoA-ligase activity        | 0.68 | 1  | 0.14005603 | 55   | 0.15883559  |
| 15576 | GO:0033177          | proton-transporting two    | 0.69 | 1  | 0.14005603 | 56   | 0.16172351  |
| 3156  | GO:0004497          | monooxygenase activity     | 0.69 | 3  | 0.42016807 | 172  | 0.49672222  |
| 6441  | GO:0009072          | aromatic amino acid fan    | 0.70 | 1  | 0.14005603 | 57   | 0.16461143  |
| 9910  | GO:0016878          | acid-thiol ligase activity | 0.70 | 1  | 0.14005603 | 57   | 0.16461143  |
| 23973 | GO:0048583          | regulation of response t   | 0.70 | 1  | 0.14005603 | 57   | 0.16461143  |
| 9800  | GO:0016746          | transferase activity, tran | 0.70 | 9  | 1.2605042  | 498  | 1.438184    |
| 5819  | GO:0008299 GO:00092 | isoprenoid biosynthetic    | 0.70 | 1  | 0.14005603 | 58   | 0.16749935  |
| 29919 | GO:0071555          | cell wall organization     | 0.70 | 1  | 0.14005603 | 58   | 0.16749935  |
| 14667 | GO:0032259          | methylation                | 0.70 | 5  | 0.70028013 | 285  | 0.8230572   |
| 8584  | GO:0015171 GO:00153 | amino acid transmembr      | 0.70 | 2  | 0.28011206 | 118  | 0.34077454  |
| 25416 | GO:0051119          | sugar transmembrane tr     | 0.70 | 2  | 0.28011206 | 118  | 0.34077454  |
| 2521  | GO:0003333          | amino acid transmembr      | 0.70 | 2  | 0.28011206 | 118  | 0.34077454  |
| 6622  | GO:0009259 GO:00091 | ribonucleotide metaboli    | 0.70 | 15 | 2.1008403  | 812  | 2.344991    |



|       |                     |                            |      |    |            |      |            |
|-------|---------------------|----------------------------|------|----|------------|------|------------|
| 8967  | GO:0015698          | inorganic anion transpo    | 0.71 | 3  | 0.42016807 | 176  | 0.5082739  |
| 9900  | GO:0016866          | intramolecular transfera   | 0.71 | 1  | 0.14005603 | 59   | 0.17038727 |
| 18981 | GO:0042651          | thylakoid membrane         | 0.71 | 1  | 0.14005603 | 59   | 0.17038727 |
| 2831  | GO:0004022          | alcohol dehydrogenase      | 0.71 | 1  | 0.14005603 | 59   | 0.17038727 |
| 13082 | GO:0030599          | pectinesterase activity    | 0.71 | 3  | 0.42016807 | 178  | 0.5140497  |
| 4840  | GO:0006720 GO:00160 | isoprenoid metabolic pr    | 0.71 | 1  | 0.14005603 | 60   | 0.17327519 |
| 5652  | GO:0008081 GO:00044 | phosphoric diester hydr    | 0.71 | 1  | 0.14005603 | 60   | 0.17327519 |
| 14910 | GO:0032502          | developmental process      | 0.72 | 2  | 0.28011206 | 121  | 0.3494383  |
| 2818  | GO:0004003          | ATP-dependent DNA he       | 0.72 | 1  | 0.14005603 | 61   | 0.1761631  |
| 11828 | GO:0019899          | enzyme binding             | 0.72 | 4  | 0.5602241  | 237  | 0.684437   |
| 4951  | GO:0006865 GO:00068 | amino acid transport       | 0.72 | 2  | 0.28011206 | 123  | 0.35521415 |
| 17000 | GO:0034621          | cellular macromolecular    | 0.73 | 1  | 0.14005603 | 62   | 0.17905103 |
| 20186 | GO:0043933 GO:00346 | macromolecular comple      | 0.73 | 1  | 0.14005603 | 62   | 0.17905103 |
| 20883 | GO:0045259 GO:00452 | proton-transporting ATP    | 0.73 | 1  | 0.14005603 | 62   | 0.17905103 |
| 4405  | GO:0006195          | purine nucleotide catab    | 0.73 | 14 | 1.9607843  | 773  | 2.232362   |
| 6508  | GO:0009143          | nucleoside triphosphate    | 0.73 | 14 | 1.9607843  | 773  | 2.232362   |
| 6509  | GO:0009144          | purine nucleoside triphd   | 0.73 | 14 | 1.9607843  | 773  | 2.232362   |
| 6511  | GO:0009146          | purine nucleoside triphd   | 0.73 | 14 | 1.9607843  | 773  | 2.232362   |
| 6519  | GO:0009154          | purine ribonucleotide ca   | 0.73 | 14 | 1.9607843  | 773  | 2.232362   |
| 6530  | GO:0009166          | nucleotide catabolic pro   | 0.73 | 14 | 1.9607843  | 773  | 2.232362   |
| 6567  | GO:0009203          | ribonucleoside triphosph   | 0.73 | 14 | 1.9607843  | 773  | 2.232362   |
| 6569  | GO:0009205          | purine ribonucleoside tr   | 0.73 | 14 | 1.9607843  | 773  | 2.232362   |
| 6571  | GO:0009207          | purine ribonucleoside tr   | 0.73 | 14 | 1.9607843  | 773  | 2.232362   |
| 6624  | GO:0009261          | ribonucleotide catabolic   | 0.73 | 14 | 1.9607843  | 773  | 2.232362   |
| 17034 | GO:0034655          | nucleobase, nucleoside     | 0.73 | 14 | 1.9607843  | 773  | 2.232362   |
| 17035 | GO:0034656          | nucleobase, nucleoside     | 0.73 | 14 | 1.9607843  | 773  | 2.232362   |
| 22209 | GO:0046700          | heterocycle catabolic pr   | 0.73 | 14 | 1.9607843  | 773  | 2.232362   |
| 30879 | GO:0072523          | purine-containing comp     | 0.73 | 14 | 1.9607843  | 773  | 2.232362   |
| 9308  | GO:0016070          | RNA metabolic process      | 0.73 | 35 | 4.901961   | 1855 | 5.3570914  |
| 20520 | GO:0044270          | cellular nitrogen compos   | 0.73 | 14 | 1.9607843  | 777  | 2.2439137  |
| 3476  | GO:0004872 GO:00190 | receptor activity          | 0.73 | 12 | 1.6806723  | 672  | 1.9406822  |
| 3761  | GO:0005275 GO:00052 | amine transmembrane t      | 0.74 | 2  | 0.28011206 | 126  | 0.3638779  |
| 25820 | GO:0051536          | iron-sulfur cluster bindin | 0.74 | 1  | 0.14005603 | 64   | 0.18482687 |
| 25824 | GO:0051540          | metal cluster binding      | 0.74 | 1  | 0.14005603 | 64   | 0.18482687 |
| 22007 | GO:0046483          | heterocycle metabolic p    | 0.74 | 20 | 2.8011205  | 1094 | 3.1593843  |
| 25314 | GO:0051015          | actin filament binding     | 0.74 | 1  | 0.14005603 | 65   | 0.18771479 |
| 9890  | GO:0016854          | racemase and epimeras      | 0.75 | 1  | 0.14005603 | 66   | 0.1906027  |
| 3475  | GO:0004871 GO:00050 | signal transducer activit  | 0.75 | 14 | 1.9607843  | 787  | 2.2727928  |
| 27063 | GO:0060089          | molecular transducer ad    | 0.75 | 14 | 1.9607843  | 787  | 2.2727928  |
| 5651  | GO:0008080          | N-acetyltransferase acti   | 0.75 | 1  | 0.14005603 | 67   | 0.19349062 |
| 2629  | GO:0003678 GO:00036 | DNA helicase activity      | 0.75 | 1  | 0.14005603 | 67   | 0.19349062 |
| 6515  | GO:0009150          | purine ribonucleotide m    | 0.76 | 14 | 1.9607843  | 791  | 2.2843447  |
| 31420 | GO:0080043          | quercetin 3-O-glucosyltr   | 0.76 | 1  | 0.14005603 | 69   | 0.19926646 |
| 9579  | GO:0016462          | pyrophosphatase activit    | 0.76 | 17 | 2.3809524  | 954  | 2.7550755  |
| 9859  | GO:0016818          | hydrolase activity, actin  | 0.77 | 17 | 2.3809524  | 956  | 2.7608514  |
| 5726  | GO:0008187          | poly-pyrimidine tract bin  | 0.77 | 1  | 0.14005603 | 70   | 0.20215438 |
| 5788  | GO:0008266          | poly(U) RNA binding        | 0.77 | 1  | 0.14005603 | 70   | 0.20215438 |
| 15524 | GO:0033124          | regulation of GTP catab    | 0.77 | 1  | 0.14005603 | 70   | 0.20215438 |
| 19394 | GO:0043087          | regulation of GTPase ac    | 0.77 | 1  | 0.14005603 | 70   | 0.20215438 |
| 9103  | GO:0015837          | amine transport            | 0.77 | 2  | 0.28011206 | 135  | 0.38986918 |
| 3307  | GO:0004675          | transmembrane recepto      | 0.77 | 6  | 0.84033614 | 367  | 1.0598665  |
| 9858  | GO:0016817          | hydrolase activity, actin  | 0.77 | 17 | 2.3809524  | 959  | 2.769515   |
| 20532 | GO:0044282          | small molecule cataboli    | 0.77 | 15 | 2.1008403  | 854  | 2.4662836  |
| 3801  | GO:0005342          | organic acid transmemb     | 0.77 | 2  | 0.28011206 | 136  | 0.3927571  |
| 22444 | GO:0046943          | carboxylic acid transme    | 0.77 | 2  | 0.28011206 | 136  | 0.3927571  |
| 19125 | GO:0042802          | identical protein binding  | 0.78 | 12 | 1.6806723  | 697  | 2.01288    |
| 9740  | GO:0016667          | oxidoreductase activity,   | 0.78 | 1  | 0.14005603 | 72   | 0.20793022 |
| 5809  | GO:0008289          | lipid binding              | 0.78 | 4  | 0.5602241  | 258  | 0.74508333 |
| 4867  | GO:0006753          | nucleoside phosphate r     | 0.78 | 16 | 2.2408965  | 914  | 2.6395588  |
| 6484  | GO:0009117          | nucleotide metabolic pr    | 0.78 | 16 | 2.2408965  | 914  | 2.6395588  |
| 4247  | GO:0006007          | glucose catabolic proces   | 0.78 | 1  | 0.14005603 | 73   | 0.21081814 |
| 11313 | GO:0019320          | hexose catabolic proces    | 0.78 | 1  | 0.14005603 | 73   | 0.21081814 |
| 20525 | GO:0044275          | cellular carbohydrate ca   | 0.78 | 1  | 0.14005603 | 73   | 0.21081814 |
| 21726 | GO:0046164          | alcohol catabolic proces   | 0.78 | 1  | 0.14005603 | 73   | 0.21081814 |
| 21894 | GO:0046365          | monosaccharide catabo      | 0.78 | 1  | 0.14005603 | 73   | 0.21081814 |
| 8607  | GO:0015197 GO:00156 | peptide transporter activ  | 0.78 | 2  | 0.28011206 | 139  | 0.40142086 |
| 8608  | GO:0015198          | oligopeptide transporter   | 0.78 | 2  | 0.28011206 | 139  | 0.40142086 |
| 4373  | GO:0006163          | purine nucleotide metab    | 0.78 | 14 | 1.9607843  | 810  | 2.339215   |
| 3311  | GO:0004683 GO:00046 | calmodulin-dependent p     | 0.79 | 1  | 0.14005603 | 74   | 0.21370606 |
| 9817  | GO:0016763          | transferase activity, tran | 0.79 | 1  | 0.14005603 | 74   | 0.21370606 |
| 20628 | GO:0044434          | chloroplast part           | 0.79 | 1  | 0.14005603 | 74   | 0.21370606 |
| 20629 | GO:0044435          | plastid part               | 0.79 | 1  | 0.14005603 | 74   | 0.21370606 |
| 3895  | GO:0005543          | phospholipid binding       | 0.79 | 2  | 0.28011206 | 140  | 0.40430877 |
| 4944  | GO:0006857          | oligopeptide transport     | 0.79 | 2  | 0.28011206 | 141  | 0.4071967  |
| 8676  | GO:0015294          | solute:cation symporter    | 0.79 | 2  | 0.28011206 | 141  | 0.4071967  |
| 9099  | GO:0015833          | peptide transport          | 0.79 | 2  | 0.28011206 | 141  | 0.4071967  |
| 8810  | GO:0015491          | cation:cation antiporter   | 0.79 | 1  | 0.14005603 | 75   | 0.21659398 |
| 5663  | GO:0008094 GO:00040 | DNA-dependent ATPas        | 0.80 | 1  | 0.14005603 | 76   | 0.2194819  |
| 5732  | GO:0008194          | UDP-glycosyltransferas     | 0.80 | 5  | 0.70028013 | 322  | 0.9299102  |
| 8557  | GO:0015144          | carbohydrate transmem      | 0.80 | 2  | 0.28011206 | 143  | 0.41297254 |
| 16602 | GO:0034219          | carbohydrate transmem      | 0.80 | 2  | 0.28011206 | 143  | 0.41297254 |
| 6529  | GO:0009165          | nucleotide biosynthetic    | 0.80 | 1  | 0.14005603 | 77   | 0.22236982 |
| 9538  | GO:0016410          | N-acyltransferase activi   | 0.80 | 1  | 0.14005603 | 77   | 0.22236982 |
| 2986  | GO:0004252          | serine-type endopeptida    | 0.80 | 2  | 0.28011206 | 144  | 0.41586044 |
| 9699  | GO:0016616          | oxidoreductase activity,   | 0.80 | 4  | 0.5602241  | 266  | 0.7681867  |
| 30865 | GO:0072509          | divalent inorganic catio   | 0.80 | 1  | 0.14005603 | 78   | 0.22525774 |
| 10058 | GO:0017111          | nucleoside-triphosphata    | 0.80 | 15 | 2.1008403  | 878  | 2.5355935  |
| 4954  | GO:0006869          | lipid transport            | 0.81 | 3  | 0.42016807 | 208  | 0.6006873  |
| 8085  | GO:0010876          | lipid localization         | 0.81 | 3  | 0.42016807 | 208  | 0.6006873  |
| 3873  | GO:0005507          | copper ion binding         | 0.81 | 2  | 0.28011206 | 146  | 0.42163628 |
| 8494  | GO:0015075          | ion transmembrane tran     | 0.81 | 14 | 1.9607843  | 827  | 2.3883097  |
| 30877 | GO:0072521          | purine-containing comp     | 0.81 | 14 | 1.9607843  | 827  | 2.3883097  |
| 6071  | GO:0008643 GO:00068 | carbohydrate transport     | 0.81 | 2  | 0.28011206 | 147  | 0.42452422 |
| 4215  | GO:0005975          | carbohydrate metabolic     | 0.81 | 17 | 2.3809524  | 990  | 2.8590407  |
| 4358  | GO:0006140          | regulation of nucleotide   | 0.81 | 1  | 0.14005603 | 80   | 0.2310336  |
| 7146  | GO:0009894          | regulation of catabolic p  | 0.81 | 1  | 0.14005603 | 80   | 0.2310336  |
| 9875  | GO:0016836          | hydro-lyase activity       | 0.81 | 1  | 0.14005603 | 80   | 0.2310336  |
| 13278 | GO:0030811          | regulation of nucleotide   | 0.81 | 1  | 0.14005603 | 80   | 0.2310336  |
| 13759 | GO:0031329          | regulation of cellular cat | 0.81 | 1  | 0.14005603 | 80   | 0.2310336  |
| 15521 | GO:0033121          | regulation of purine nuc   | 0.81 | 1  | 0.14005603 | 80   | 0.2310336  |
| 16603 | GO:0034220          | ion transmembrane tran     | 0.82 | 14 | 1.9607843  | 833  | 2.4056373  |
| 22376 | GO:0046873          | metal ion transmembran     | 0.82 | 3  | 0.42016807 | 213  | 0.6151269  |
| 6991  | GO:0009725          | response to hormone st     | 0.82 | 1  | 0.14005603 | 82   | 0.23680943 |
| 29202 | GO:0070838          | divalent metal ion trans   | 0.82 | 1  | 0.14005603 | 82   | 0.23680943 |
| 26932 | GO:0055086          | nucleobase, nucleoside     | 0.82 | 16 | 2.2408965  | 944  | 2.7261963  |
| 4029  | GO:0005740          | mitochondrial envelope     | 0.82 | 2  | 0.28011206 | 151  | 0.4360759  |
| 16738 | GO:0034357          | photosynthetic membra      | 0.82 | 1  | 0.14005603 | 83   | 0.23969735 |

|       |                     |                            |      |     |            |       |            |
|-------|---------------------|----------------------------|------|-----|------------|-------|------------|
| 4327  | GO:006091           | generation of precursor    | 0.83 | 1   | 0.14005603 | 84    | 0.24258527 |
| 30867 | GO:0072511          | divalent inorganic cation  | 0.83 | 1   | 0.14005603 | 84    | 0.24258527 |
| 12547 | GO:0022857 GO:00053 | transmembrane transp       | 0.83 | 26  | 3.6414566  | 1483  | 4.282785   |
| 17617 | GO:0035251          | UDP-glucosyltransferas     | 0.83 | 3   | 0.42016807 | 218   | 0.62956655 |
| 6985  | GO:0009719          | response to endogenous     | 0.83 | 1   | 0.14005603 | 86    | 0.24836111 |
| 9114  | GO:0015849          | organic acid transport     | 0.83 | 2   | 0.28011206 | 156   | 0.45051548 |
| 22443 | GO:0046942          | carboxylic acid transport  | 0.83 | 2   | 0.28011206 | 156   | 0.45051548 |
| 4246  | GO:0006006          | glucose metabolic proc     | 0.84 | 1   | 0.14005603 | 87    | 0.25124902 |
| 7229  | GO:0009987 GO:00081 | cellular process           | 0.84 | 207 | 28.991596  | 10601 | 30.614838  |
| 26931 | GO:0055085          | transmembrane transp       | 0.84 | 27  | 3.7815125  | 1548  | 4.4705     |
| 12794 | GO:0030234          | enzyme regulator activi    | 0.84 | 6   | 0.84033614 | 403   | 1.1638317  |
| 5195  | GO:0007165 GO:00230 | signal transduction        | 0.84 | 16  | 2.2408965  | 961   | 2.775291   |
| 12602 | GO:0023052 GO:00230 | signaling                  | 0.84 | 16  | 2.2408965  | 961   | 2.775291   |
| 7691  | GO:0010467          | gene expression            | 0.84 | 35  | 4.901961   | 1974  | 5.7007537  |
| 8496  | GO:0015078          | hydrogen ion transmem      | 0.84 | 2   | 0.28011206 | 160   | 0.4620672  |
| 14590 | GO:0032182          | small conjugating protei   | 0.85 | 1   | 0.14005603 | 90    | 0.2599128  |
| 20630 | GO:0044436          | thylakoid part             | 0.85 | 1   | 0.14005603 | 90    | 0.2599128  |
| 2982  | GO:0004197          | cysteine-type endopept     | 0.85 | 1   | 0.14005603 | 90    | 0.2599128  |
| 4990  | GO:0006915 GO:00086 | apoptosis                  | 0.85 | 3   | 0.42016807 | 227   | 0.6555578  |
| 3644  | GO:0005102          | receptor binding           | 0.85 | 1   | 0.14005603 | 91    | 0.2628007  |
| 9294  | GO:0016052 GO:00060 | carbohydrate catabolic     | 0.85 | 1   | 0.14005603 | 91    | 0.2628007  |
| 5764  | GO:0008234 GO:00042 | cysteine-type peptidase    | 0.85 | 2   | 0.28011206 | 163   | 0.47073093 |
| 16785 | GO:0034404          | nucleobase_nucleoside      | 0.85 | 1   | 0.14005603 | 92    | 0.26568863 |
| 17033 | GO:0034654          | nucleobase_nucleoside      | 0.85 | 1   | 0.14005603 | 92    | 0.26568863 |
| 4916  | GO:0006818          | hydrogen transport         | 0.85 | 4   | 0.5602241  | 292   | 0.84327257 |
| 9246  | GO:0015992          | proton transport           | 0.85 | 4   | 0.5602241  | 292   | 0.84327257 |
| 20336 | GO:0044085          | cellular component biog    | 0.86 | 1   | 0.14005603 | 93    | 0.26857653 |
| 20623 | GO:0044429          | mitochondrial part         | 0.86 | 2   | 0.28011206 | 165   | 0.47650677 |
| 6863  | GO:0009579          | thylakoid                  | 0.86 | 1   | 0.14005603 | 94    | 0.27146447 |
| 18633 | GO:0042277          | peptide binding            | 0.86 | 1   | 0.14005603 | 95    | 0.27435237 |
| 25095 | GO:0050790          | regulation of catalytic ac | 0.87 | 7   | 0.98039216 | 480   | 1.3862015  |
| 5756  | GO:0008219          | cell death                 | 0.87 | 3   | 0.42016807 | 239   | 0.69021285 |
| 8209  | GO:0012501 GO:00162 | programmed cell death      | 0.87 | 3   | 0.42016807 | 239   | 0.69021285 |
| 9462  | GO:0016265          | death                      | 0.87 | 3   | 0.42016807 | 239   | 0.69021285 |
| 28366 | GO:0065009          | regulation of molecular    | 0.87 | 7   | 0.98039216 | 484   | 1.3977532  |
| 7271  | GO:0010033          | response to organic sub    | 0.88 | 1   | 0.14005603 | 100   | 0.28879198 |
| 4067  | GO:0005783          | endoplasmic reticulum      | 0.88 | 2   | 0.28011206 | 174   | 0.50249803 |
| 2674  | GO:0003824          | catalytic activity         | 0.88 | 208 | 29.131653  | 10750 | 31.045137  |
| 8211  | GO:0012505          | endomembrane system        | 0.88 | 3   | 0.42016807 | 242   | 0.6988766  |
| 11311 | GO:0019318          | hexose metabolic proces    | 0.88 | 1   | 0.14005603 | 101   | 0.2916799  |
| 5874  | GO:0008374          | O-acyltransferase activi   | 0.88 | 1   | 0.14005603 | 102   | 0.29456782 |
| 20498 | GO:0044248          | cellular catabolic proces  | 0.88 | 14  | 1.9607843  | 894   | 2.5818002  |
| 3306  | GO:0004674 GO:00046 | protein serine/threonine   | 0.89 | 17  | 2.3809524  | 1062  | 3.0669708  |
| 12608 | GO:0030001          | metal ion transport        | 0.89 | 5   | 0.70028013 | 374   | 1.080082   |
| 3200  | GO:0004553 GO:00168 | hydrolase activity, hydr   | 0.89 | 4   | 0.5602241  | 312   | 0.90103096 |
| 19253 | GO:0042936          | dipeptide transporter ac   | 0.89 | 1   | 0.14005603 | 105   | 0.3032316  |
| 19255 | GO:0042938          | dipeptide transport        | 0.89 | 1   | 0.14005603 | 105   | 0.3032316  |
| 3195  | GO:0004540          | ribonuclease activity      | 0.89 | 1   | 0.14005603 | 106   | 0.3061195  |
| 4910  | GO:0006811          | ion transport              | 0.89 | 15  | 2.1008403  | 959   | 2.769515   |
| 3942  | GO:0005618          | cell wall                  | 0.89 | 1   | 0.14005603 | 107   | 0.30900744 |
| 20505 | GO:0044255          | cellular lipid metabolic p | 0.90 | 2   | 0.28011206 | 184   | 0.53137726 |
| 12868 | GO:0030312          | external encapsulating s   | 0.90 | 1   | 0.14005603 | 111   | 0.3205591  |
| 4512  | GO:0006325          | chromatin organization     | 0.90 | 1   | 0.14005603 | 112   | 0.32344702 |
| 25568 | GO:0051276 GO:00070 | chromosome organizati      | 0.90 | 1   | 0.14005603 | 112   | 0.32344702 |
| 4850  | GO:0006732 GO:00067 | coenzyme metabolic pro     | 0.91 | 1   | 0.14005603 | 113   | 0.32633495 |
| 3449  | GO:0004842 GO:00048 | ubiquitin-protein ligase   | 0.91 | 4   | 0.5602241  | 326   | 0.94146186 |
| 14379 | GO:0031966          | mitochondrial membran      | 0.91 | 1   | 0.14005603 | 114   | 0.32922286 |
| 22478 | GO:0046982          | protein heterodimerizati   | 0.91 | 1   | 0.14005603 | 114   | 0.32922286 |
| 9535  | GO:0016407          | acetyltransferase activit  | 0.91 | 1   | 0.14005603 | 115   | 0.3321108  |
| 22479 | GO:0046983          | protein dimerization acti  | 0.91 | 7   | 0.98039216 | 517   | 1.4930545  |
| 9654  | GO:0016567          | protein ubiquitination     | 0.91 | 4   | 0.5602241  | 332   | 0.9587894  |
| 12572 | GO:0022890 GO:00150 | inorganic cation transp    | 0.91 | 4   | 0.5602241  | 332   | 0.9587894  |
| 14854 | GO:0032446          | protein modification by s  | 0.91 | 4   | 0.5602241  | 332   | 0.9587894  |
| 29011 | GO:0070647          | protein modification by s  | 0.91 | 4   | 0.5602241  | 332   | 0.9587894  |
| 3955  | GO:0005634          | nucleus                    | 0.91 | 23  | 3.2212884  | 1433  | 4.138389   |
| 4144  | GO:0005886 GO:00059 | plasma membrane            | 0.92 | 1   | 0.14005603 | 120   | 0.34655038 |
| 6425  | GO:0009056          | catabolic process          | 0.92 | 16  | 2.2408965  | 1051  | 3.0352037  |
| 11747 | GO:0019787 GO:00086 | small conjugating protei   | 0.92 | 4   | 0.5602241  | 339   | 0.9790048  |
| 14380 | GO:0031967          | organelle envelope         | 0.92 | 2   | 0.28011206 | 201   | 0.5804719  |
| 30066 | GO:0071702          | organic substance trans    | 0.92 | 7   | 0.98039216 | 529   | 1.5277096  |
| 4755  | GO:0006629          | lipid metabolic process    | 0.92 | 8   | 1.1204482  | 590   | 1.7038727  |
| 30069 | GO:0071705          | nitrogen compound tran     | 0.92 | 2   | 0.28011206 | 202   | 0.5833598  |
| 14387 | GO:0031975          | envelope                   | 0.93 | 2   | 0.28011206 | 205   | 0.59202355 |
| 4236  | GO:0005996          | monosaccharide metab       | 0.93 | 1   | 0.14005603 | 125   | 0.36099    |
| 4649  | GO:0006520 GO:00065 | cellular amino acid meta   | 0.93 | 3   | 0.42016807 | 277   | 0.7999538  |
| 634   | GO:0000988          | protein binding transcrip  | 0.93 | 1   | 0.14005603 | 126   | 0.3638779  |
| 635   | GO:0000989          | transcription factor bind  | 0.93 | 1   | 0.14005603 | 126   | 0.3638779  |
| 2648  | GO:0003712          | transcription cofactor ac  | 0.93 | 1   | 0.14005603 | 126   | 0.3638779  |
| 28378 | GO:0070011          | peptidase activity, actin  | 0.93 | 7   | 0.98039216 | 537   | 1.550813   |
| 5840  | GO:0008324          | cation transmembrane t     | 0.93 | 7   | 0.98039216 | 538   | 1.5537009  |
| 9583  | GO:0016469          | proton-transporting two    | 0.93 | 1   | 0.14005603 | 127   | 0.36676583 |
| 21058 | GO:0045454 GO:00305 | cell redox homeostasis     | 0.93 | 2   | 0.28011206 | 211   | 0.6093511  |
| 4394  | GO:0006184          | GTP catabolic process      | 0.94 | 1   | 0.14005603 | 132   | 0.3812054  |
| 21605 | GO:0046039          | GTP metabolic process      | 0.94 | 1   | 0.14005603 | 132   | 0.3812054  |
| 2758  | GO:0003924          | GTPase activity            | 0.94 | 1   | 0.14005603 | 132   | 0.3812054  |
| 9837  | GO:0016788          | hydrolase activity, actin  | 0.94 | 24  | 3.3613446  | 1534  | 4.430069   |
| 4028  | GO:0005739          | mitochondrion              | 0.94 | 2   | 0.28011206 | 219   | 0.63245445 |
| 13547 | GO:0031090          | organelle membrane         | 0.95 | 2   | 0.28011206 | 224   | 0.64689404 |
| 6046  | GO:0008610          | lipid biosynthetic proces  | 0.95 | 1   | 0.14005603 | 141   | 0.4071967  |
| 5763  | GO:0008233          | peptidase activity         | 0.95 | 7   | 0.98039216 | 565   | 1.6316746  |
| 4304  | GO:0006066          | alcohol metabolic proces   | 0.95 | 1   | 0.14005603 | 143   | 0.41297254 |
| 20356 | GO:0044106          | cellular amine metabol     | 0.95 | 3   | 0.42016807 | 303   | 0.8750397  |
| 9488  | GO:0016301          | kinase activity            | 0.95 | 27  | 3.7815125  | 1740  | 5.0249805  |
| 9829  | GO:0016779          | nucleotidyltransferase a   | 0.95 | 1   | 0.14005603 | 148   | 0.42741212 |
| 11695 | GO:0019725          | cellular homeostasis       | 0.96 | 2   | 0.28011206 | 234   | 0.67577326 |
| 12573 | GO:0022891          | substrate-specific trans   | 0.96 | 18  | 2.5210085  | 1241  | 3.5839086  |
| 18925 | GO:0042592          | homeostatic process        | 0.96 | 2   | 0.28011206 | 238   | 0.68732494 |
| 6662  | GO:0009308          | amine metabolic proces     | 0.96 | 3   | 0.42016807 | 314   | 0.9068068  |
| 25998 | GO:0051716          | cellular response to stim  | 0.96 | 16  | 2.2408965  | 1138  | 3.2864528  |
| 9913  | GO:0016881          | acid-amino acid ligase a   | 0.96 | 4   | 0.5602241  | 391   | 1.1291766  |
| 2975  | GO:0004175 GO:00168 | endopeptidase activity     | 0.96 | 3   | 0.42016807 | 320   | 0.9241344  |
| 3716  | GO:0005198          | structural molecule activ  | 0.96 | 4   | 0.5602241  | 393   | 1.1349525  |
| 2660  | GO:0003735 GO:00037 | structural constituent of  | 0.96 | 2   | 0.28011206 | 246   | 0.7104283  |
| 9906  | GO:0016874          | ligase activity            | 0.96 | 7   | 0.98039216 | 597   | 1.7240882  |
| 4911  | GO:0006812 GO:00068 | cation transport           | 0.96 | 8   | 1.1204482  | 662   | 1.9118029  |
| 5661  | GO:0008092          | cytoskeletal protein bind  | 0.97 | 2   | 0.28011206 | 249   | 0.719092   |
| 3723  | GO:0005215 GO:00054 | transporter activity       | 0.97 | 28  | 3.9215686  | 1844  | 5.325324   |



|       |                     |                            |      |     |            |       |            |
|-------|---------------------|----------------------------|------|-----|------------|-------|------------|
| 3304  | GO:004672 GO:00502  | protein kinase activity    | 0.97 | 19  | 2.6610644  | 1333  | 3.8495972  |
| 5055  | GO:006996           | organelle organization     | 0.97 | 1   | 0.14005603 | 164   | 0.47361887 |
| 25483 | GO:0051186          | cofactor metabolic proc    | 0.97 | 1   | 0.14005603 | 164   | 0.47361887 |
| 5909  | GO:0008415          | acyltransferase activity   | 0.97 | 3   | 0.42016807 | 330   | 0.95301354 |
| 5018  | GO:0006950          | response to stress         | 0.97 | 7   | 0.98039216 | 611   | 1.764519   |
| 6077  | GO:0008652          | cellular amino acid bios   | 0.97 | 1   | 0.14005603 | 169   | 0.48805845 |
| 19526 | GO:0043227          | membrane-bounded org       | 0.97 | 33  | 4.6218486  | 2142  | 6.185924   |
| 19530 | GO:0043231          | intracellular membrane-    | 0.97 | 33  | 4.6218486  | 2142  | 6.185924   |
| 30306 | GO:0071944          | cell periphery             | 0.97 | 2   | 0.28011206 | 259   | 0.74797124 |
| 9285  | GO:0016043          | cellular component orga    | 0.97 | 2   | 0.28011206 | 261   | 0.7537471  |
| 13656 | GO:0031224          | intrinsic to membrane      | 0.98 | 16  | 2.2408965  | 1193  | 3.4452884  |
| 6663  | GO:0009309          | amine biosynthetic proc    | 0.98 | 1   | 0.14005603 | 181   | 0.5227135  |
| 9824  | GO:0016773          | phosphotransferase act     | 0.98 | 21  | 2.9411764  | 1493  | 4.311664   |
| 5610  | GO:0008026          | ATP-dependent helicase     | 0.98 | 1   | 0.14005603 | 183   | 0.52848935 |
| 28401 | GO:0070035          | purine NTP-dependent       | 0.98 | 1   | 0.14005603 | 183   | 0.52848935 |
| 9836  | GO:0016787          | hydrolase activity         | 0.98 | 61  | 8.543417   | 3723  | 10.751725  |
| 2657  | GO:0003727 GO:00037 | single-stranded RNA bin    | 0.98 | 1   | 0.14005603 | 188   | 0.54292893 |
| 30204 | GO:0071840          | cellular component orga    | 0.98 | 3   | 0.42016807 | 362   | 1.045427   |
| 3068  | GO:0004386          | helicase activity          | 0.98 | 1   | 0.14005603 | 189   | 0.54581684 |
| 30205 | GO:0071841          | cellular component orga    | 0.98 | 2   | 0.28011206 | 285   | 0.8230572  |
| 30206 | GO:0071842          | cellular component orga    | 0.98 | 1   | 0.14005603 | 193   | 0.5573685  |
| 9267  | GO:0016021          | integral to membrane       | 0.98 | 14  | 1.9607843  | 1103  | 3.1853757  |
| 10244 | GO:0018130          | heterocycle biosynthetic   | 0.98 | 1   | 0.14005603 | 199   | 0.57469606 |
| 9911  | GO:0016879          | ligase activity, forming d | 0.99 | 4   | 0.5602241  | 456   | 1.3168914  |
| 9889  | GO:0016853          | isomerase activity         | 0.99 | 2   | 0.28011206 | 306   | 0.8837035  |
| 9295  | GO:0016053          | organic acid biosynthetic  | 0.99 | 1   | 0.14005603 | 211   | 0.6093511  |
| 21922 | GO:0046394          | carboxylic acid biosynth   | 0.99 | 1   | 0.14005603 | 211   | 0.6093511  |
| 4612  | GO:0006468          | protein phosphorylation    | 0.99 | 32  | 4.481793   | 2205  | 6.367863   |
| 15436 | GO:0033036          | macromolecule localiza     | 0.99 | 3   | 0.42016807 | 397   | 1.1465042  |
| 9493  | GO:0016310          | phosphorylation            | 0.99 | 37  | 5.1820726  | 2504  | 7.2313514  |
| 9823  | GO:0016772          | transferase activity, tran | 0.99 | 27  | 3.7815125  | 1932  | 5.579461   |
| 28365 | GO:0065008          | regulation of biological p | 0.99 | 2   | 0.28011206 | 316   | 0.9125827  |
| 2627  | GO:0003676          | nucleic acid binding       | 0.99 | 36  | 5.042017   | 2453  | 7.0840673  |
| 12574 | GO:0022892          | substrate-specific transp  | 0.99 | 19  | 2.6610644  | 1463  | 4.2250266  |
| 5019  | GO:0006952 GO:00022 | defense response           | 0.99 | 1   | 0.14005603 | 221   | 0.63823026 |
| 20640 | GO:0044446          | intracellular organelle pa | 0.99 | 7   | 0.98039216 | 710   | 2.0504231  |
| 20616 | GO:0044422          | organelle part             | 0.99 | 7   | 0.98039216 | 712   | 2.0561988  |
| 13531 | GO:0031072          | heat shock protein bindi   | 0.99 | 1   | 0.14005603 | 230   | 0.6642216  |
| 4909  | GO:0006810 GO:00154 | transport                  | 0.99 | 33  | 4.6218486  | 2315  | 6.6855345  |
| 25529 | GO:0051234          | establishment of localiza  | 0.99 | 33  | 4.6218486  | 2315  | 6.6855345  |
| 25476 | GO:0051179          | localization               | 0.99 | 33  | 4.6218486  | 2319  | 6.697086   |
| 20533 | GO:0044283          | small molecule biosynth    | 0.99 | 2   | 0.28011206 | 347   | 1.0021082  |
| 20512 | GO:0044262 GO:00060 | cellular carbohydrate m    | 0.99 | 1   | 0.14005603 | 248   | 0.7162041  |
| 20521 | GO:0044271          | cellular nitrogen compo    | 1.00 | 2   | 0.28011206 | 367   | 1.0598665  |
| 19533 | GO:0043234          | protein complex            | 1.00 | 8   | 1.1204482  | 848   | 2.448956   |
| 20619 | GO:0044425          | membrane part              | 1.00 | 18  | 2.5210085  | 1523  | 4.398302   |
| 11522 | GO:0019538 GO:00064 | protein metabolic proces   | 1.00 | 62  | 8.683474   | 4134  | 11.938661  |
| 4109  | GO:0005840 GO:00332 | ribosome                   | 1.00 | 5   | 0.70028013 | 682   | 1.9695613  |
| 19527 | GO:0043228          | non-membrane-bounde        | 1.00 | 8   | 1.1204482  | 923   | 2.66555    |
| 19531 | GO:0043232          | intracellular non-membr    | 1.00 | 8   | 1.1204482  | 923   | 2.66555    |
| 19525 | GO:0043226          | organelle                  | 1.00 | 41  | 5.7422967  | 3013  | 8.701303   |
| 19528 | GO:0043229          | intracellular organelle    | 1.00 | 41  | 5.7422967  | 3013  | 8.701303   |
| 18912 | GO:0042578          | phosphoric ester hydroly   | 1.00 | 2   | 0.28011206 | 444   | 1.2822365  |
| 13041 | GO:0030554          | adenyl nucleotide bindin   | 1.00 | 3   | 0.42016807 | 550   | 1.5883559  |
| 14965 | GO:0032559          | adenyl ribonucleotide bi   | 1.00 | 3   | 0.42016807 | 550   | 1.5883559  |
| 4609  | GO:0006464          | protein modification pro   | 1.00 | 36  | 5.042017   | 2781  | 8.031305   |
| 13018 | GO:0030529          | ribonucleoprotein comp     | 1.00 | 5   | 0.70028013 | 741   | 2.1399486  |
| 4897  | GO:0006793          | phosphorus metabolic p     | 1.00 | 38  | 5.322129   | 2925  | 8.4471655  |
| 4900  | GO:0006796          | phosphate metabolic pr     | 1.00 | 38  | 5.322129   | 2925  | 8.4471655  |
| 9839  | GO:0016791 GO:00163 | phosphatase activity       | 1.00 | 1   | 0.14005603 | 383   | 1.1060733  |
| 3884  | GO:0005524          | ATP binding                | 1.00 | 2   | 0.28011206 | 524   | 1.51327    |
| 19684 | GO:0043412          | macromolecule modifca      | 1.00 | 36  | 5.042017   | 2900  | 8.374968   |
| 9494  | GO:0016311          | dephosphorylation          | 1.00 | 1   | 0.14005603 | 425   | 1.227366   |
| 3177  | GO:0004518          | nuclease activity          | 1.00 | 1   | 0.14005603 | 427   | 1.2331418  |
| 3863  | GO:0005488          | binding                    | 1.00 | 240 | 33.613445  | 13903 | 40.15075   |
| 20618 | GO:0044424          | intracellular part         | 1.00 | 50  | 7.002801   | 3853  | 11.127155  |
| 20638 | GO:0044444          | cytoplasmic part           | 1.00 | 15  | 2.1008403  | 1644  | 4.7477403  |
| 131   | GO:0000166          | nucleotide binding         | 1.00 | 9   | 1.2605042  | 1213  | 3.5030468  |
| 9266  | GO:0016020          | membrane                   | 1.00 | 46  | 6.442577   | 3741  | 10.803708  |
| 15392 | GO:0032991          | macromolecular comple      | 1.00 | 13  | 1.8207283  | 1616  | 4.666878   |
| 3945  | GO:0005622          | intracellular              | 1.00 | 62  | 8.683474   | 4751  | 13.720507  |
| 4027  | GO:0005737          | cytoplasm                  | 1.00 | 18  | 2.5210085  | 2001  | 5.7787275  |
| 14959 | GO:0032553          | ribonucleotide binding     | 1.00 | 3   | 0.42016807 | 795   | 2.2958963  |
| 14961 | GO:0032555          | purine ribonucleotide bi   | 1.00 | 3   | 0.42016807 | 795   | 2.2958963  |
| 10033 | GO:0017076          | purine nucleotide bindi    | 1.00 | 3   | 0.42016807 | 797   | 2.3016722  |
| 20517 | GO:0044267          | cellular protein metaboli  | 1.00 | 36  | 5.042017   | 3225  | 9.313541   |
| 18000 | GO:0035639          | purine ribonucleoside tr   | 1.00 | 2   | 0.28011206 | 769   | 2.2208104  |
| 2626  | GO:0003674 GO:00055 | molecular function         | 1.00 | 446 | 62.464985  | 24394 | 70.447914  |
| 3903  | GO:0005575 GO:00083 | cellular_component         | 1.00 | 119 | 16.666666  | 8515  | 24.590637  |
| 2653  | GO:0003723          | RNA binding                | 1.00 | 1   | 0.14005603 | 797   | 2.3016722  |
| 3876  | GO:0005515 GO:00453 | protein binding            | 1.00 | 87  | 12.184874  | 6933  | 20.021948  |
| 3946  | GO:0005623          | cell                       | 1.00 | 108 | 15.12605   | 8227  | 23.758917  |
| 20657 | GO:0044464          | cell part                  | 1.00 | 108 | 15.12605   | 8227  | 23.758917  |
