# Supplementary material for: The Tomato Hybrid Proline-rich Protein regulates the abscission zone competence to respond to ethylene signals
Source: PubMed Central journal article supplement (PMC5981600; doi:10.1038/s41438-018-0033-2), 2018-06-01
Supplement: 41438_2018_33_MOESM5_ESM.pdf [file 41438_2018_33_MOESM5_ESM.pdf]

Table S5. Differentially regulated genes (up and down regulated) in the control compared with THyPRP silenced plants in FAZ at 12 h along with their expression values, fold changes, annotations, GO ids and terms.

Worksheet 2 & 3

| Set4                 |                  |           |      |                 |       |
|----------------------|------------------|-----------|------|-----------------|-------|
| Line                 | Array            | Details   | Time | Treated vs. Con | Set   |
| Control – New Yorker | 254331010026_1_3 | 12h_7_AZ  | 12h  | Control         | Set 4 |
| Control – New Yorker | 254331010026_1_4 | 12h_8_AZ  | 12h  |                 |       |
| TAPG + TPRP          | 254331010035_1_3 | 12h_43_AZ | 12h  | Treated         |       |
| TAPG + TPRP          | 254331010035_1_4 | 12h_44_AZ | 12h  |                 |       |

**Note:**

Fold change expression values are provided as logbase 2

**Flagging Criteria:**

Compromised: If the gProcessedSignal value is less than the background intensity

Detected: If the gProcessedSignal value is above background intensity

| Column Header   | Description                                                     |
|-----------------|-----------------------------------------------------------------|
| ProbeName       | Unique probe identifier                                         |
| GeneName        | GeneSymbol                                                      |
| Fold            | Fold change calculated is log base 2                            |
| Flag            | Detected or Compromised                                         |
| GeomeanFold     | Average Fold change for the replicates calculated is log base 2 |
| p-Value         | t-test p- value                                                 |
| gProcessedSigna | Background subtracted signal intensity                          |

Worksheet 4 & 5

This file contains the fold change for all the spots in the array

**GO ID**

Gene Ontology ID

**GO ACCESSION**

Gene Ontology Function name

**p-value :**

The probability of obtaining the specified GO accession number from a list of random entities. Less the p-value more significant is the GO accession number.

**Significant pvalue<0.05**

**Count in Selection :**

This refers to the number of genes in the selected entity (for example, from T-test) list which have that particular GO term.

**%Count in Selection :**

This refers to the percentage of genes in the input entity list which have that GO term.

**Count in Total :**

This refers to the number of genes in All Entities which have that GO term.

**%Count in Total :**

This refers to the percentage of genes in the All Entities list which have that GO term.

Cut off used to filter up and down regulated genes

**Upregulated**

For filtering upregulation we consider flag should be Detected in the treated sample and can be Compromised or Detected in the control sample and fold>=0.8 in the individual replicates and fold>=1 in the Geomean of treated samples.

**Downregulated**

For filtering downregulation we consider flag can be Detected or Compromised in the treated sample and should be Detected in the control sample and fold<=-0.8 in the individual replicates and fold<=-1 in the Geomean of treated samples.

**Differentially Regulated Probes**

| Sample                                 | Up   | Down |
|----------------------------------------|------|------|
| 4h_TPRP_AZ vs. 4h_Control_AZ_Sense     | 1415 | 1392 |
| 4h_TPRP_AZ vs. 4h_Control_AZ_Antisense | 536  | 872  |





































| Q1 | Q2 | Q3 | Q4 | Q5 | Q6 | Q7 | Q8 | Q9 | Q10 | Q11 | Q12 | Q13 | Q14 | Q15 | Q16 | Q17 | Q18 | Q19 | Q20 | Q21 | Q22 | Q23 | Q24 | Q25 | Q26 | Q27 | Q28 | Q29 | Q30 | Q31 | Q32 | Q33 | Q34 | Q35 | Q36 | Q37 | Q38 | Q39 | Q40 | Q41 | Q42 | Q43 | Q44 | Q45 | Q46 | Q47 | Q48 | Q49 | Q50 | Q51 | Q52 | Q53 | Q54 | Q55 | Q56 | Q57 | Q58 | Q59 | Q60 | Q61 | Q62 | Q63 | Q64 | Q65 | Q66 | Q67 | Q68 | Q69 | Q70 | Q71 | Q72 | Q73 | Q74 | Q75 | Q76 | Q77 | Q78 | Q79 | Q80 | Q81 | Q82 | Q83 | Q84 | Q85 | Q86 | Q87 | Q88 | Q89 | Q90 | Q91 | Q92 | Q93 | Q94 | Q95 | Q96 | Q97 | Q98 | Q99 | Q100 |
|----|----|----|----|----|----|----|----|----|-----|-----|-----|-----|-----|-----|-----|-----|-----|-----|-----|-----|-----|-----|-----|-----|-----|-----|-----|-----|-----|-----|-----|-----|-----|-----|-----|-----|-----|-----|-----|-----|-----|-----|-----|-----|-----|-----|-----|-----|-----|-----|-----|-----|-----|-----|-----|-----|-----|-----|-----|-----|-----|-----|-----|-----|-----|-----|-----|-----|-----|-----|-----|-----|-----|-----|-----|-----|-----|-----|-----|-----|-----|-----|-----|-----|-----|-----|-----|-----|-----|-----|-----|-----|-----|-----|-----|-----|-----|-----|------|
| Q1 | Q2 | Q3 | Q4 | Q5 | Q6 | Q7 | Q8 | Q9 | Q10 | Q11 | Q12 | Q13 | Q14 | Q15 | Q16 | Q17 | Q18 | Q19 | Q20 | Q21 | Q22 | Q23 | Q24 | Q25 | Q26 | Q27 | Q28 | Q29 | Q30 | Q31 | Q32 | Q33 | Q34 | Q35 | Q36 | Q37 | Q38 | Q39 | Q40 | Q41 | Q42 | Q43 | Q44 | Q45 | Q46 | Q47 | Q48 | Q49 | Q50 | Q51 | Q52 | Q53 | Q54 | Q55 | Q56 | Q57 | Q58 | Q59 | Q60 | Q61 | Q62 | Q63 | Q64 | Q65 | Q66 | Q67 | Q68 | Q69 | Q70 | Q71 | Q72 | Q73 | Q74 | Q75 | Q76 | Q77 | Q78 | Q79 | Q80 | Q81 | Q82 | Q83 | Q84 | Q85 | Q86 | Q87 | Q88 | Q89 | Q90 | Q91 | Q92 | Q93 | Q94 | Q95 | Q96 | Q97 | Q98 | Q99 | Q100 |



| Q1 | Q2 | Q3 | Q4 | Q5 | Q6 | Q7 | Q8 | Q9 | Q10 | Q11 | Q12 | Q13 | Q14 | Q15 | Q16 | Q17 | Q18 | Q19 | Q20 | Q21 | Q22 | Q23 | Q24 | Q25 | Q26 | Q27 | Q28 | Q29 | Q30 | Q31 | Q32 | Q33 | Q34 | Q35 | Q36 | Q37 | Q38 | Q39 | Q40 | Q41 | Q42 | Q43 | Q44 | Q45 | Q46 | Q47 | Q48 | Q49 | Q50 | Q51 | Q52 | Q53 | Q54 | Q55 | Q56 | Q57 | Q58 | Q59 | Q60 | Q61 | Q62 | Q63 | Q64 | Q65 | Q66 | Q67 | Q68 | Q69 | Q70 | Q71 | Q72 | Q73 | Q74 | Q75 | Q76 | Q77 | Q78 | Q79 | Q80 | Q81 | Q82 | Q83 | Q84 | Q85 | Q86 | Q87 | Q88 | Q89 | Q90 | Q91 | Q92 | Q93 | Q94 | Q95 | Q96 | Q97 | Q98 | Q99 | Q100 |
|----|----|----|----|----|----|----|----|----|-----|-----|-----|-----|-----|-----|-----|-----|-----|-----|-----|-----|-----|-----|-----|-----|-----|-----|-----|-----|-----|-----|-----|-----|-----|-----|-----|-----|-----|-----|-----|-----|-----|-----|-----|-----|-----|-----|-----|-----|-----|-----|-----|-----|-----|-----|-----|-----|-----|-----|-----|-----|-----|-----|-----|-----|-----|-----|-----|-----|-----|-----|-----|-----|-----|-----|-----|-----|-----|-----|-----|-----|-----|-----|-----|-----|-----|-----|-----|-----|-----|-----|-----|-----|-----|-----|-----|-----|-----|-----|------|
| Q1 | Q2 | Q3 | Q4 | Q5 | Q6 | Q7 | Q8 | Q9 | Q10 | Q11 | Q12 | Q13 | Q14 | Q15 | Q16 | Q17 | Q18 | Q19 | Q20 | Q21 | Q22 | Q23 | Q24 | Q25 | Q26 | Q27 | Q28 | Q29 | Q30 | Q31 | Q32 | Q33 | Q34 | Q35 | Q36 | Q37 | Q38 | Q39 | Q40 | Q41 | Q42 | Q43 | Q44 | Q45 | Q46 | Q47 | Q48 | Q49 | Q50 | Q51 | Q52 | Q53 | Q54 | Q55 | Q56 | Q57 | Q58 | Q59 | Q60 | Q61 | Q62 | Q63 | Q64 | Q65 | Q66 | Q67 | Q68 | Q69 | Q70 | Q71 | Q72 | Q73 | Q74 | Q75 | Q76 | Q77 | Q78 | Q79 | Q80 | Q81 | Q82 | Q83 | Q84 | Q85 | Q86 | Q87 | Q88 | Q89 | Q90 | Q91 | Q92 | Q93 | Q94 | Q95 | Q96 | Q97 | Q98 | Q99 | Q100 |







| GO ID | GO ACCESSION       | GO Term                   | p-value | Count in Selection | % Count in Selection | Count in Total | % Count in Total |
|-------|--------------------|---------------------------|---------|--------------------|----------------------|----------------|------------------|
| 8530  | GO:0015116         | sulfate transmembran      | 0.00    | 5                  | 0.74294204           | 26             | 0.075085916      |
| 5793  | GO:0008272 GO:000  | sulfate transport         | 0.00    | 5                  | 0.74294204           | 28             | 0.080861755      |
| 8736  | GO:0015381         | high affinity sulfate tra | 0.00    | 4                  | 0.5943536            | 18             | 0.051982556      |
| 5792  | GO:0008271         | secondary active sulfa    | 0.00    | 4                  | 0.5943536            | 18             | 0.051982556      |
| 8584  | GO:0015171 GO:0015 | amino acid transmeml      | 0.00    | 9                  | 1.3372957            | 118            | 0.34077454       |
| 2521  | GO:0003333         | amino acid transmeml      | 0.00    | 9                  | 1.3372957            | 118            | 0.34077454       |
| 4951  | GO:0006865 GO:0006 | amino acid transport      | 0.00    | 9                  | 1.3372957            | 123            | 0.35521415       |
| 3761  | GO:0005275 GO:0005 | amine transmembrane       | 0.00    | 9                  | 1.3372957            | 126            | 0.3638779        |
| 9806  | GO:0016752         | sinapoyltransferase ac    | 0.00    | 4                  | 0.5943536            | 23             | 0.06642216       |
| 9807  | GO:0016753         | O-sinapoyltransferase     | 0.00    | 4                  | 0.5943536            | 23             | 0.06642216       |
| 9808  | GO:0016754         | sinapoylglucose-malat     | 0.00    | 4                  | 0.5943536            | 23             | 0.06642216       |
| 9114  | GO:0015849         | organic acid transport    | 0.00    | 10                 | 1.4858841            | 156            | 0.45051548       |
| 22443 | GO:0046942         | carboxylic acid transp    | 0.00    | 10                 | 1.4858841            | 156            | 0.45051548       |
| 9600  | GO:0016491         | oxidoreductase activit    | 0.00    | 52                 | 7.265973             | 1724           | 4.9787736        |
| 9103  | GO:0015837         | amine transport           | 0.00    | 9                  | 1.3372957            | 135            | 0.38986918       |
| 3801  | GO:0005342         | organic acid transmem     | 0.00    | 9                  | 1.3372957            | 136            | 0.3927571        |
| 22444 | GO:0046943         | carboxylic acid transr    | 0.00    | 9                  | 1.3372957            | 136            | 0.3927571        |
| 5729  | GO:0008191         | metalloendopeptidase      | 0.00    | 2                  | 0.2971768            | 4              | 0.011551679      |
| 23942 | GO:0048551         | metalloenzyme inhibi      | 0.00    | 2                  | 0.2971768            | 4              | 0.011551679      |
| 7792  | GO:0010576         | metalloenzyme regula      | 0.00    | 2                  | 0.2971768            | 4              | 0.011551679      |
| 8967  | GO:0015698         | inorganic anion transp    | 0.00    | 10                 | 1.4858841            | 176            | 0.5082739        |
| 11827 | GO:0019898 GO:0036 | extrinsic to membrane     | 0.00    | 4                  | 0.5943536            | 30             | 0.086637594      |
| 3884  | GO:0005524         | ATP binding               | 0.00    | 20                 | 2.9717681            | 524            | 1.51327          |
| 21949 | GO:0046424         | ferulate 5-hydroxylase    | 0.00    | 2                  | 0.2971768            | 5              | 0.0144396        |
| 7220  | GO:0009973         | adenyllyl-sulfate reduc   | 0.01    | 2                  | 0.2971768            | 6              | 0.01732752       |
| 7690  | GO:0010466         | negative regulation of    | 0.01    | 7                  | 1.0401188            | 110            | 0.31767118       |
| 12946 | GO:0030414         | peptidase inhibitor act   | 0.01    | 7                  | 1.0401188            | 110            | 0.31767118       |
| 25636 | GO:0051346         | negative regulation of    | 0.01    | 7                  | 1.0401188            | 110            | 0.31767118       |
| 13041 | GO:0030554         | adenyl nucleotide bind    | 0.01    | 20                 | 2.9717681            | 550            | 1.5883559        |
| 14965 | GO:0032559         | adenyl ribonucleotide     | 0.01    | 20                 | 2.9717681            | 550            | 1.5883559        |
| 12547 | GO:0022857 GO:0005 | transmembrane transp      | 0.01    | 43                 | 6.389302             | 1483           | 4.282785         |
| 26711 | GO:0052547         | regulation of peptidase   | 0.01    | 7                  | 1.0401188            | 112            | 0.32344702       |
| 28100 | GO:0061134         | peptidase regulator ac    | 0.01    | 7                  | 1.0401188            | 112            | 0.32344702       |
| 26931 | GO:0055085         | transmembrane transp      | 0.01    | 44                 | 6.53789              | 1548           | 4.4705           |
| 5981  | GO:0008509         | anion transmembrane       | 0.01    | 11                 | 1.6344725            | 245            | 0.70754033       |
| 5704  | GO:0008150 GO:0006 | biological_process        | 0.01    | 461                | 68.49926             | 22215          | 64.155136        |
| 4917  | GO:0006820 GO:0006 | anion transport           | 0.01    | 11                 | 1.6344725            | 247            | 0.7133162        |
| 26959 | GO:0055114         | oxidation-reduction pr    | 0.01    | 65                 | 9.658247             | 2490           | 7.1909204        |
| 11776 | GO:0019825         | oxygen binding            | 0.01    | 15                 | 2.228826             | 389            | 1.1234008        |
| 3472  | GO:0004866         | endopeptidase inhibi      | 0.01    | 6                  | 0.89153045           | 95             | 0.27435237       |
| 8159  | GO:0010951         | negative regulation of    | 0.01    | 6                  | 0.89153045           | 95             | 0.27435237       |
| 26712 | GO:0052548         | regulation of endopept    | 0.01    | 6                  | 0.89153045           | 95             | 0.27435237       |
| 28101 | GO:0061135         | endopeptidase regulat     | 0.01    | 6                  | 0.89153045           | 95             | 0.27435237       |
| 8517  | GO:0015103         | inorganic anion transp    | 0.01    | 8                  | 1.1887072            | 154            | 0.44473964       |
| 3723  | GO:0005215 GO:0005 | transporter activity      | 0.01    | 50                 | 7.4294205            | 1844           | 5.325324         |
| 19393 | GO:0043086         | negative regulation of    | 0.01    | 9                  | 1.3372957            | 188            | 0.54292893       |
| 20342 | GO:0044092         | negative regulation of    | 0.01    | 9                  | 1.3372957            | 188            | 0.54292893       |
| 3464  | GO:0004857         | enzyme inhibitor activ    | 0.01    | 8                  | 1.1887072            | 157            | 0.4534034        |
| 12516 | GO:0022804         | active transmembrane      | 0.01    | 25                 | 3.7147102            | 787            | 2.2727928        |
| 25379 | GO:0051082         | unfolded protein bindin   | 0.01    | 6                  | 0.89153045           | 98             | 0.28301615       |
| 12574 | GO:0022892         | substrate-specific tran   | 0.01    | 41                 | 6.092125             | 1463           | 4.2250266        |
| 4878  | GO:0006772         | thiamine metabolic pro    | 0.02    | 2                  | 0.2971768            | 10             | 0.0288792        |
| 6592  | GO:0009228         | thiamine biosynthetic     | 0.02    | 2                  | 0.2971768            | 10             | 0.0288792        |
| 8651  | GO:0015248         | sterol transporter activ  | 0.02    | 2                  | 0.2971768            | 10             | 0.0288792        |
| 9178  | GO:0015918         | sterol transport          | 0.02    | 2                  | 0.2971768            | 10             | 0.0288792        |
| 10072 | GO:0017127         | cholesterol transporter   | 0.02    | 2                  | 0.2971768            | 10             | 0.0288792        |
| 12859 | GO:0030301         | cholesterol transport     | 0.02    | 2                  | 0.2971768            | 10             | 0.0288792        |
| 30069 | GO:0071705         | nitrogen compound tra     | 0.02    | 9                  | 1.3372957            | 202            | 0.5833598        |
| 3380  | GO:0004766         | spermidine synthase a     | 0.02    | 2                  | 0.2971768            | 11             | 0.03176712       |
| 12573 | GO:0022891         | substrate-specific tran   | 0.02    | 35                 | 5.2005944            | 1241           | 3.5839086        |
| 4261  | GO:0006023         | aminoglycan biosynthe     | 0.02    | 1                  | 0.1485884            | 1              | 0.00288792       |
| 4262  | GO:0006024         | glycosaminoglycan bid     | 0.02    | 1                  | 0.1485884            | 1              | 0.00288792       |
| 6615  | GO:0009252 GO:0005 | peptidoglycan biosynt     | 0.02    | 1                  | 0.1485884            | 1              | 0.00288792       |
| 7606  | GO:0010382         | cellular cell wall macr   | 0.02    | 1                  | 0.1485884            | 1              | 0.00288792       |
| 12766 | GO:0030203         | glycosaminoglycan me      | 0.02    | 1                  | 0.1485884            | 1              | 0.00288792       |
| 20289 | GO:0044038         | cell wall macromolecul    | 0.02    | 1                  | 0.1485884            | 1              | 0.00288792       |
| 28953 | GO:0070589         | cellular component ma     | 0.02    | 1                  | 0.1485884            | 1              | 0.00288792       |
| 205   | GO:0000270 GO:0005 | peptidoglycan metabo      | 0.02    | 1                  | 0.1485884            | 1              | 0.00288792       |
| 3827  | GO:0005372         | water transmembrane       | 0.02    | 5                  | 0.74294204           | 81             | 0.23392151       |
| 4927  | GO:0006833         | water transport           | 0.02    | 5                  | 0.74294204           | 81             | 0.23392151       |
| 8652  | GO:0015250         | water channel activity    | 0.02    | 5                  | 0.74294204           | 81             | 0.23392151       |
| 18429 | GO:0042044         | fluid transport           | 0.02    | 5                  | 0.74294204           | 81             | 0.23392151       |
| 6826  | GO:0009538         | photosystem I reactor     | 0.02    | 2                  | 0.2971768            | 12             | 0.03465504       |
| 19047 | GO:0042723         | thiamine-containing co    | 0.02    | 2                  | 0.2971768            | 12             | 0.03465504       |
| 19048 | GO:0042724         | thiamine-containing co    | 0.02    | 2                  | 0.2971768            | 12             | 0.03465504       |
| 4894  | GO:0006790         | sulfur compound meta      | 0.02    | 4                  | 0.5943536            | 55             | 0.15883559       |
| 6515  | GO:0009150         | purine ribonucleotide r   | 0.02    | 24                 | 3.5661218            | 791            | 2.2843447        |
| 9933  | GO:0016903         | oxidoreductase activit    | 0.02    | 6                  | 0.89153045           | 113            | 0.32633495       |
| 4493  | GO:0006298 GO:0006 | mismatch repair           | 0.03    | 3                  | 0.44576523           | 33             | 0.09530135       |
| 24966 | GO:0050660         | flavin adenine dinucle    | 0.03    | 6                  | 0.89153045           | 118            | 0.34077454       |
| 4373  | GO:0006163         | purine nucleotide meta    | 0.03    | 24                 | 3.5661218            | 810            | 2.339215         |
| 18000 | GO:0035639         | purine ribonucleoside     | 0.03    | 23                 | 3.4175334            | 769            | 2.2208104        |
| 6622  | GO:0009259 GO:0005 | ribonucleotide metabo     | 0.03    | 24                 | 3.5661218            | 812            | 2.344991         |
| 12533 | GO:0022838         | substrate-specific cha    | 0.03    | 9                  | 1.3372957            | 221            | 0.63823026       |
| 9719  | GO:0016638         | oxidoreductase activit    | 0.03    | 5                  | 0.74294204           | 89             | 0.25702485       |
| 4405  | GO:0006195         | purine nucleotide cata    | 0.03    | 23                 | 3.4175334            | 773            | 2.232362         |
| 6508  | GO:0009143         | nucleoside triphospha     | 0.03    | 23                 | 3.4175334            | 773            | 2.232362         |
| 6509  | GO:0009144         | purine nucleoside triph   | 0.03    | 23                 | 3.4175334            | 773            | 2.232362         |
| 6511  | GO:0009146         | purine nucleoside triph   | 0.03    | 23                 | 3.4175334            | 773            | 2.232362         |
| 6519  | GO:0009154         | purine ribonucleotide     | 0.03    | 23                 | 3.4175334            | 773            | 2.232362         |



|       |                    |                           |      |    |            |      |             |
|-------|--------------------|---------------------------|------|----|------------|------|-------------|
| 6530  | GO:0009166         | nucleotide catabolic p    | 0.03 | 23 | 3.4175334  | 773  | 2.232362    |
| 6567  | GO:0009203         | ribonucleoside triphos    | 0.03 | 23 | 3.4175334  | 773  | 2.232362    |
| 6569  | GO:0009205         | purine ribonucleoside     | 0.03 | 23 | 3.4175334  | 773  | 2.232362    |
| 6571  | GO:0009207         | purine ribonucleoside     | 0.03 | 23 | 3.4175334  | 773  | 2.232362    |
| 6624  | GO:0009261         | ribonucleotide catabol    | 0.03 | 23 | 3.4175334  | 773  | 2.232362    |
| 17034 | GO:0034655         | nucleobase, nucleosid     | 0.03 | 23 | 3.4175334  | 773  | 2.232362    |
| 17035 | GO:0034656         | nucleobase, nucleosid     | 0.03 | 23 | 3.4175334  | 773  | 2.232362    |
| 22209 | GO:0046700         | heterocycle catabolic     | 0.03 | 23 | 3.4175334  | 773  | 2.232362    |
| 30879 | GO:0072523         | purine-containing com     | 0.03 | 23 | 3.4175334  | 773  | 2.232362    |
| 20520 | GO:0044270         | cellular nitrogen comp    | 0.03 | 23 | 3.4175334  | 777  | 2.2439137   |
| 8660  | GO:0015267 GO:0015 | channel activity          | 0.03 | 9  | 1.3372957  | 226  | 0.6526699   |
| 12515 | GO:0022803         | passive transmembra       | 0.03 | 9  | 1.3372957  | 226  | 0.6526699   |
| 6810  | GO:0009522         | photosystem I             | 0.03 | 2  | 0.2971768  | 15   | 0.043318797 |
| 12650 | GO:0030060         | L-malate dehydrogena      | 0.03 | 2  | 0.2971768  | 15   | 0.043318797 |
| 24968 | GO:0050662         | coenzyme binding          | 0.03 | 8  | 1.1887072  | 191  | 0.5515927   |
| 30877 | GO:0072521         | purine-containing com     | 0.03 | 24 | 3.5661218  | 827  | 2.3883097   |
| 6563  | GO:0009199         | ribonucleoside triphos    | 0.04 | 23 | 3.4175334  | 790  | 2.2814567   |
| 3334  | GO:0004713 GO:0004 | protein tyrosine kinase   | 0.04 | 2  | 0.2971768  | 16   | 0.046206716 |
| 206   | GO:0000271         | polysaccharide biosyn     | 0.04 | 2  | 0.2971768  | 16   | 0.046206716 |
| 2878  | GO:0004072         | aspartate kinase activ    | 0.04 | 1  | 0.1485884  | 2    | 0.00577584  |
| 3013  | GO:0004328 GO:0034 | formamidase activity      | 0.04 | 1  | 0.1485884  | 2    | 0.00577584  |
| 3069  | GO:0004392         | heme oxygenase (dec       | 0.04 | 1  | 0.1485884  | 2    | 0.00577584  |
| 3335  | GO:0004714         | transmembrane recep       | 0.04 | 1  | 0.1485884  | 2    | 0.00577584  |
| 3337  | GO:0004716         | receptor signaling prof   | 0.04 | 1  | 0.1485884  | 2    | 0.00577584  |
| 3434  | GO:0004825         | methionine-tRNA ligas     | 0.04 | 1  | 0.1485884  | 2    | 0.00577584  |
| 3595  | GO:0005017         | platelet-derived growth   | 0.04 | 1  | 0.1485884  | 2    | 0.00577584  |
| 3664  | GO:0005128         | erythropoietin receptor   | 0.04 | 1  | 0.1485884  | 2    | 0.00577584  |
| 3709  | GO:0005176         | ErbB-2 class receptor     | 0.04 | 1  | 0.1485884  | 2    | 0.00577584  |
| 3751  | GO:0005251         | delayed rectifier potas   | 0.04 | 1  | 0.1485884  | 2    | 0.00577584  |
| 3899  | GO:0005547         | phosphatidylinositol-3    | 0.04 | 1  | 0.1485884  | 2    | 0.00577584  |
| 4907  | GO:0006808         | regulation of nitrogen    | 0.04 | 1  | 0.1485884  | 2    | 0.00577584  |
| 5907  | GO:0008413         | 8-oxo-7,8-dihydroguar     | 0.04 | 1  | 0.1485884  | 2    | 0.00577584  |
| 5923  | GO:0008430         | selenium binding          | 0.04 | 1  | 0.1485884  | 2    | 0.00577584  |
| 6023  | GO:0008569         | minus-end-directed m      | 0.04 | 1  | 0.1485884  | 2    | 0.00577584  |
| 7532  | GO:0010307         | acetylglutamate kinas     | 0.04 | 1  | 0.1485884  | 2    | 0.00577584  |
| 8513  | GO:0015098         | molybdate ion transme     | 0.04 | 1  | 0.1485884  | 2    | 0.00577584  |
| 8958  | GO:0015689         | molybdate ion transpo     | 0.04 | 1  | 0.1485884  | 2    | 0.00577584  |
| 9380  | GO:0016151         | nickel ion binding        | 0.04 | 1  | 0.1485884  | 2    | 0.00577584  |
| 11186 | GO:0019177         | dihydroneopterin triph    | 0.04 | 1  | 0.1485884  | 2    | 0.00577584  |
| 23486 | GO:0048008         | platelet-derived growth   | 0.04 | 1  | 0.1485884  | 2    | 0.00577584  |
| 24640 | GO:0050321         | tau-protein kinase acti   | 0.04 | 1  | 0.1485884  | 2    | 0.00577584  |
| 24919 | GO:0050613 GO:0006 | delta14-sterol reducta    | 0.04 | 1  | 0.1485884  | 2    | 0.00577584  |
| 24987 | GO:0050681         | androgen receptor bin     | 0.04 | 1  | 0.1485884  | 2    | 0.00577584  |
| 190   | GO:0000247         | C-8 sterol isomerase a    | 0.04 | 1  | 0.1485884  | 2    | 0.00577584  |
| 10058 | GO:0017111         | nucleoside-triphospha     | 0.04 | 25 | 3.7147102  | 878  | 2.5355935   |
| 14959 | GO:0032553         | ribonucleotide binding    | 0.04 | 23 | 3.4175334  | 795  | 2.2958963   |
| 14961 | GO:0032555         | purine ribonucleotide     | 0.04 | 23 | 3.4175334  | 795  | 2.2958963   |
| 3473  | GO:0004867         | serine-type endopeptid    | 0.04 | 4  | 0.5943536  | 66   | 0.1906027   |
| 6888  | GO:0009611 GO:0002 | response to wounding      | 0.04 | 4  | 0.5943536  | 66   | 0.1906027   |
| 6506  | GO:0009141         | nucleoside triphospha     | 0.04 | 23 | 3.4175334  | 796  | 2.2987843   |
| 10033 | GO:0017076         | purine nucleotide bind    | 0.04 | 23 | 3.4175334  | 797  | 2.3016722   |
| 9923  | GO:0016892         | endoribonuclease acti     | 0.04 | 2  | 0.2971768  | 17   | 0.049094636 |
| 9925  | GO:0016894         | endonuclease activity     | 0.04 | 2  | 0.2971768  | 17   | 0.049094636 |
| 9930  | GO:0016899         | oxidoreductase activit    | 0.04 | 2  | 0.2971768  | 17   | 0.049094636 |
| 16281 | GO:0033897         | ribonuclease T2 activi    | 0.04 | 2  | 0.2971768  | 17   | 0.049094636 |
| 11828 | GO:0019899         | enzyme binding            | 0.04 | 9  | 1.3372957  | 237  | 0.684437    |
| 22409 | GO:0046906         | tetrapyrrole binding      | 0.05 | 18 | 2.6745913  | 596  | 1.7212002   |
| 4408  | GO:0006200         | ATP catabolic process     | 0.05 | 19 | 2.8231797  | 641  | 1.8511566   |
| 9918  | GO:0016887 GO:0004 | ATPase activity           | 0.05 | 19 | 2.8231797  | 641  | 1.8511566   |
| 21600 | GO:0046034         | ATP metabolic proces      | 0.05 | 19 | 2.8231797  | 641  | 1.8511566   |
| 20532 | GO:0044282         | small molecule catabo     | 0.05 | 24 | 3.5661218  | 854  | 2.4662836   |
| 5874  | GO:0008374         | O-acyltransferase acti    | 0.05 | 5  | 0.74294204 | 102  | 0.29456782  |
| 3744  | GO:0005244         | voltage-gated ion chan    | 0.05 | 4  | 0.5943536  | 72   | 0.20793022  |
| 12528 | GO:0022832         | voltage-gated channel     | 0.05 | 4  | 0.5943536  | 72   | 0.20793022  |
| 15280 | GO:0032879         | regulation of localizat   | 0.05 | 4  | 0.5943536  | 72   | 0.20793022  |
| 17141 | GO:0034762         | regulation of transmem    | 0.05 | 4  | 0.5943536  | 72   | 0.20793022  |
| 17144 | GO:0034765         | regulation of ion trans   | 0.05 | 4  | 0.5943536  | 72   | 0.20793022  |
| 19568 | GO:0043269         | regulation of ion trans   | 0.05 | 4  | 0.5943536  | 72   | 0.20793022  |
| 25348 | GO:0051049         | regulation of transport   | 0.05 | 4  | 0.5943536  | 72   | 0.20793022  |
| 2895  | GO:0004089         | carbonate dehydratas      | 0.05 | 2  | 0.2971768  | 19   | 0.054870475 |
| 20522 | GO:0044272         | sulfur compound biosy     | 0.05 | 3  | 0.44576523 | 44   | 0.12706847  |
| 19253 | GO:0042936         | dipeptide transporter a   | 0.05 | 5  | 0.74294204 | 105  | 0.3032316   |
| 19255 | GO:0042938         | dipeptide transport       | 0.05 | 5  | 0.74294204 | 105  | 0.3032316   |
| 9579  | GO:0016462         | pyrophosphatase activ     | 0.05 | 26 | 3.8632987  | 954  | 2.7550755   |
| 9859  | GO:0016818         | hydrolase activity, acti  | 0.06 | 26 | 3.8632987  | 956  | 2.7608514   |
| 9768  | GO:0016706         | oxidoreductase activit    | 0.06 | 7  | 1.0401188  | 175  | 0.505386    |
| 30066 | GO:0071702         | organic substance traf    | 0.06 | 16 | 2.3774145  | 529  | 1.5277096   |
| 4867  | GO:0006753         | nucleoside phosphate      | 0.06 | 25 | 3.7147102  | 914  | 2.6395588   |
| 6484  | GO:0009117         | nucleotide metabolic p    | 0.06 | 25 | 3.7147102  | 914  | 2.6395588   |
| 31431 | GO:0080054         | low affinity nitrate tran | 0.06 | 3  | 0.44576523 | 45   | 0.1299564   |
| 3747  | GO:0005247         | voltage-gated chloride    | 0.06 | 2  | 0.2971768  | 20   | 0.0577584   |
| 3754  | GO:0005254         | chloride channel activi   | 0.06 | 2  | 0.2971768  | 20   | 0.0577584   |
| 6201  | GO:0008794         | arsenate reductase (g     | 0.06 | 2  | 0.2971768  | 20   | 0.0577584   |
| 9707  | GO:0016624         | oxidoreductase activit    | 0.06 | 2  | 0.2971768  | 20   | 0.0577584   |
| 13086 | GO:0030611         | arsenate reductase ac     | 0.06 | 2  | 0.2971768  | 20   | 0.0577584   |
| 13088 | GO:0030613         | oxidoreductase activit    | 0.06 | 2  | 0.2971768  | 20   | 0.0577584   |
| 13089 | GO:0030614         | oxidoreductase activit    | 0.06 | 2  | 0.2971768  | 20   | 0.0577584   |
| 6636  | GO:0009273         | peptidoglycan-based c     | 0.06 | 1  | 0.1485884  | 3    | 0.00866376  |
| 18884 | GO:0042546         | cell wall biogenesis      | 0.06 | 1  | 0.1485884  | 3    | 0.00866376  |
| 9858  | GO:0016817         | hydrolase activity, acti  | 0.06 | 26 | 3.8632987  | 959  | 2.769515    |
| 28364 | GO:0065007         | biological regulation     | 0.06 | 99 | 14.710253  | 4376 | 12.637537   |



|       |                    |                           |      |     |            |       |             |
|-------|--------------------|---------------------------|------|-----|------------|-------|-------------|
| 9396  | GO:0016168         | chlorophyll binding       | 0.06 | 3   | 0.44576523 | 46    | 0.13284431  |
| 3129  | GO:0004467         | long-chain fatty acid-C   | 0.06 | 2   | 0.2971768  | 21    | 0.060646318 |
| 9698  | GO:0016615         | malate dehydrogenase      | 0.06 | 2   | 0.2971768  | 21    | 0.060646318 |
| 2986  | GO:0004252         | serine-type endopeptid    | 0.06 | 6   | 0.89153045 | 144   | 0.41586044  |
| 7074  | GO:0009815         | 1-aminocyclopropane-      | 0.07 | 3   | 0.44576523 | 49    | 0.14150807  |
| 25094 | GO:0050789 GO:0050 | regulation of biological  | 0.07 | 97  | 14.413075  | 4315  | 12.461374   |
| 4755  | GO:0006629         | lipid metabolic process   | 0.07 | 17  | 2.526003   | 590   | 1.7038727   |
| 4478  | GO:0006281         | DNA repair                | 0.07 | 6   | 0.89153045 | 149   | 0.43030006  |
| 5037  | GO:0006974 GO:0034 | response to DNA dam       | 0.07 | 6   | 0.89153045 | 149   | 0.43030006  |
| 4918  | GO:0006821         | chloride transport        | 0.07 | 2   | 0.2971768  | 23    | 0.060642216 |
| 4216  | GO:0005976         | polysaccharide metab      | 0.07 | 3   | 0.44576523 | 50    | 0.14439599  |
| 7166  | GO:0009914         | hormone transport         | 0.07 | 3   | 0.44576523 | 50    | 0.14439599  |
| 27891 | GO:0060918         | auxin transport           | 0.07 | 3   | 0.44576523 | 50    | 0.14439599  |
| 31536 | GO:0080161         | auxin transmembrane       | 0.07 | 3   | 0.44576523 | 50    | 0.14439599  |
| 26932 | GO:0055086         | nucleobase, nucleosid     | 0.08 | 25  | 3.7147102  | 944   | 2.7261963   |
| 2789  | GO:0003968         | RNA-directed RNA pc       | 0.08 | 1   | 0.1485884  | 4     | 0.011551679 |
| 3057  | GO:0004373         | glycogen (starch) synt    | 0.08 | 1   | 0.1485884  | 4     | 0.011551679 |
| 3084  | GO:0004412         | homoserine dehydrog       | 0.08 | 1   | 0.1485884  | 4     | 0.011551679 |
| 3336  | GO:0004715         | non-membrane spann        | 0.08 | 1   | 0.1485884  | 4     | 0.011551679 |
| 3557  | GO:0004970         | ionotropic glutamate r    | 0.08 | 1   | 0.1485884  | 4     | 0.011551679 |
| 4039  | GO:0005751 GO:0005 | mitochondrial respirat    | 0.08 | 1   | 0.1485884  | 4     | 0.011551679 |
| 5641  | GO:0008066         | glutamate receptor ac     | 0.08 | 1   | 0.1485884  | 4     | 0.011551679 |
| 5942  | GO:0008456         | alpha-N-acetylglactos     | 0.08 | 1   | 0.1485884  | 4     | 0.011551679 |
| 7170  | GO:0009918         | sterol delta7 reductase   | 0.08 | 1   | 0.1485884  | 4     | 0.011551679 |
| 7538  | GO:0010313         | phytochrome binding       | 0.08 | 1   | 0.1485884  | 4     | 0.011551679 |
| 8594  | GO:0015184         | L-cystine transmembr      | 0.08 | 1   | 0.1485884  | 4     | 0.011551679 |
| 8598  | GO:0015188         | L-isoleucine transmem     | 0.08 | 1   | 0.1485884  | 4     | 0.011551679 |
| 9072  | GO:0015803         | branched-chain alpha      | 0.08 | 1   | 0.1485884  | 4     | 0.011551679 |
| 9080  | GO:0015811         | L-cystine transport       | 0.08 | 1   | 0.1485884  | 4     | 0.011551679 |
| 9086  | GO:0015818         | isoleucine transport      | 0.08 | 1   | 0.1485884  | 4     | 0.011551679 |
| 9745  | GO:0016672         | oxidoreductase activit    | 0.08 | 1   | 0.1485884  | 4     | 0.011551679 |
| 10089 | GO:0017151         | DEAD/H-box RNA hel        | 0.08 | 1   | 0.1485884  | 4     | 0.011551679 |
| 15186 | GO:0032784         | regulation of transcript  | 0.08 | 1   | 0.1485884  | 4     | 0.011551679 |
| 15188 | GO:0032786         | positive regulation of t  | 0.08 | 1   | 0.1485884  | 4     | 0.011551679 |
| 15369 | GO:0032968 GO:0090 | positive regulation of t  | 0.08 | 1   | 0.1485884  | 4     | 0.011551679 |
| 16626 | GO:0034243 GO:0090 | regulation of transcript  | 0.08 | 1   | 0.1485884  | 4     | 0.011551679 |
| 17623 | GO:0035257         | nuclear hormone rece      | 0.08 | 1   | 0.1485884  | 4     | 0.011551679 |
| 17624 | GO:0035258         | steroid hormone recep     | 0.08 | 1   | 0.1485884  | 4     | 0.011551679 |
| 20810 | GO:0045174         | glutathione dehydroge     | 0.08 | 1   | 0.1485884  | 4     | 0.011551679 |
| 20901 | GO:0045277 GO:0045 | respiratory chain com     | 0.08 | 1   | 0.1485884  | 4     | 0.011551679 |
| 23084 | GO:0047598         | 7-dehydrocholesterol      | 0.08 | 1   | 0.1485884  | 4     | 0.011551679 |
| 25055 | GO:0050750         | low-density lipoprotein   | 0.08 | 1   | 0.1485884  | 4     | 0.011551679 |
| 25711 | GO:0051427         | hormone receptor bind     | 0.08 | 1   | 0.1485884  | 4     | 0.011551679 |
| 28689 | GO:0070325         | lipoprotein particle rec  | 0.08 | 1   | 0.1485884  | 4     | 0.011551679 |
| 31507 | GO:0080132         | fatty acid alpha-hydrox   | 0.08 | 1   | 0.1485884  | 4     | 0.011551679 |
| 75    | GO:0000099         | sulfur amino acid trans   | 0.08 | 1   | 0.1485884  | 4     | 0.011551679 |
| 77    | GO:0000101         | sulfur amino acid trans   | 0.08 | 1   | 0.1485884  | 4     | 0.011551679 |
| 4311  | GO:0006073         | cellular glucan metabo    | 0.08 | 2   | 0.2971768  | 24    | 0.06931008  |
| 4692  | GO:0006563         | L-serine metabolic pro    | 0.08 | 2   | 0.2971768  | 24    | 0.06931008  |
| 20293 | GO:0044042         | glucan metabolic proc     | 0.08 | 2   | 0.2971768  | 24    | 0.06931008  |
| 2809  | GO:0003993         | acid phosphatase acti     | 0.08 | 3   | 0.44576523 | 52    | 0.15017183  |
| 6424  | GO:0009055 GO:0009 | electron carrier activit  | 0.08 | 6   | 0.89153045 | 154   | 0.44473964  |
| 5705  | GO:0008152         | metabolic process         | 0.08 | 357 | 53.046062  | 17432 | 50.34222    |
| 21145 | GO:0045543         | gibberellin 2-beta-diox   | 0.08 | 2   | 0.2971768  | 25    | 0.072197996 |
| 22007 | GO:0046483         | heterocycle metabolic     | 0.09 | 28  | 4.1604753  | 1094  | 3.1593843   |
| 25626 | GO:0051336         | regulation of hydrolase   | 0.09 | 7   | 1.0401188  | 196   | 0.5660323   |
| 11224 | GO:0019222         | regulation of metabolic   | 0.09 | 71  | 10.549777  | 3115  | 8.995871    |
| 28365 | GO:0065008         | regulation of biological  | 0.09 | 10  | 1.4858841  | 316   | 0.9125827   |
| 2962  | GO:0004160         | dihydroxy-acid dehydr     | 0.09 | 1   | 0.1485884  | 5     | 0.0144396   |
| 3392  | GO:0004779         | sulfate adenylyltransfe   | 0.09 | 1   | 0.1485884  | 5     | 0.0144396   |
| 3394  | GO:0004781         | sulfate adenylyltransfe   | 0.09 | 1   | 0.1485884  | 5     | 0.0144396   |
| 5243  | GO:0007218         | neuropeptide signaling    | 0.09 | 1   | 0.1485884  | 5     | 0.0144396   |
| 14047 | GO:0031625         | ubiquitin protein ligase  | 0.09 | 1   | 0.1485884  | 5     | 0.0144396   |
| 24603 | GO:0050284         | sinapate 1-glucosyltra    | 0.09 | 1   | 0.1485884  | 5     | 0.0144396   |
| 4909  | GO:0006810 GO:0015 | transport                 | 0.09 | 54  | 8.023774   | 2315  | 6.6855345   |
| 25529 | GO:0051234         | establishment of local    | 0.09 | 54  | 8.023774   | 2315  | 6.6855345   |
| 21331 | GO:0045735         | nutrient reservoir activ  | 0.10 | 4   | 0.5943536  | 89    | 0.25702485  |
| 8919  | GO:0015645         | fatty acid ligase activit | 0.10 | 2   | 0.2971768  | 27    | 0.077973835 |
| 12794 | GO:0030234         | enzyme regulator activ    | 0.10 | 12  | 1.7830609  | 403   | 1.1638317   |
| 25476 | GO:0051179         | localization              | 0.10 | 54  | 8.023774   | 2319  | 6.697086    |
| 8673  | GO:0015291 GO:0015 | secondary active trans    | 0.10 | 12  | 1.7830609  | 407   | 1.1753833   |
| 6438  | GO:0009069         | serine family amino ac    | 0.10 | 2   | 0.2971768  | 28    | 0.080861755 |
| 6809  | GO:0009521 GO:0030 | photosystem               | 0.10 | 2   | 0.2971768  | 28    | 0.080861755 |
| 6940  | GO:0009672         | auxin:hydrogen sympla     | 0.10 | 2   | 0.2971768  | 28    | 0.080861755 |
| 8028  | GO:0010817         | regulation of hormone     | 0.10 | 3   | 0.44576523 | 58    | 0.16749935  |
| 9422  | GO:0016209         | antioxidant activity      | 0.10 | 6   | 0.89153045 | 165   | 0.47650677  |
| 20498 | GO:0044248         | cellular catabolic proc   | 0.11 | 23  | 3.4175334  | 894   | 2.5818002   |
| 2694  | GO:0003844         | 1,4-alpha-glucan bran     | 0.11 | 1   | 0.1485884  | 6     | 0.01732752  |
| 2713  | GO:0003863         | 3-methyl-2-oxobutano      | 0.11 | 1   | 0.1485884  | 6     | 0.01732752  |
| 3029  | GO:0004345         | glucose-6-phosphate t     | 0.11 | 1   | 0.1485884  | 6     | 0.01732752  |
| 3058  | GO:0004375         | glycine dehydrogenase     | 0.11 | 1   | 0.1485884  | 6     | 0.01732752  |
| 3065  | GO:0004382         | guanosine-diphosphat      | 0.11 | 1   | 0.1485884  | 6     | 0.01732752  |
| 3777  | GO:0005302 GO:0015 | L-tyrosine transmembr     | 0.11 | 1   | 0.1485884  | 6     | 0.01732752  |
| 3845  | GO:0005452         | inorganic anion excha     | 0.11 | 1   | 0.1485884  | 6     | 0.01732752  |
| 4532  | GO:0006357 GO:0006 | regulation of transcript  | 0.11 | 1   | 0.1485884  | 6     | 0.01732752  |
| 4953  | GO:0006868 GO:0015 | glutamine transport       | 0.11 | 1   | 0.1485884  | 6     | 0.01732752  |
| 8586  | GO:0015173         | aromatic amino acid tr    | 0.11 | 1   | 0.1485884  | 6     | 0.01732752  |
| 8596  | GO:0015186         | L-glutamine transmem      | 0.11 | 1   | 0.1485884  | 6     | 0.01732752  |
| 9070  | GO:0015801         | aromatic amino acid tr    | 0.11 | 1   | 0.1485884  | 6     | 0.01732752  |
| 9096  | GO:0015828         | tyrosine transport        | 0.11 | 1   | 0.1485884  | 6     | 0.01732752  |
| 9723  | GO:0016642         | oxidoreductase activit    | 0.11 | 1   | 0.1485884  | 6     | 0.01732752  |
| 9825  | GO:0016774         | phosphotransferase a      | 0.11 | 1   | 0.1485884  | 6     | 0.01732752  |
| 11169 | GO:0019156         | isoamylase activity       | 0.11 | 1   | 0.1485884  | 6     | 0.01732752  |
| 13832 | GO:0031409         | pigment binding           | 0.11 | 1   | 0.1485884  | 6     | 0.01732752  |
| 22095 | GO:0046577         | long-chain-alcohol oxi    | 0.11 | 1   | 0.1485884  | 6     | 0.01732752  |



|       |                    |                          |      |    |            |      |             |
|-------|--------------------|--------------------------|------|----|------------|------|-------------|
| 23230 | GO:0047746         | chlorophyllase activity  | 0.11 | 1  | 0.1485884  | 6    | 0.01732752  |
| 30707 | GO:0072348         | sulfur compound trans    | 0.11 | 1  | 0.1485884  | 6    | 0.01732752  |
| 191   | GO:0000248         | C-5 sterol desaturase    | 0.11 | 1  | 0.1485884  | 6    | 0.01732752  |
| 9266  | GO:0016020         | membrane                 | 0.11 | 83 | 12.332838  | 3741 | 10.803708   |
| 4215  | GO:0005975         | carbohydrate metabol     | 0.11 | 25 | 3.7147102  | 990  | 2.8590407   |
| 3886  | GO:0005527         | macrolide binding        | 0.11 | 2  | 0.2971768  | 30   | 0.086637594 |
| 3887  | GO:0005528         | FK506 binding            | 0.11 | 2  | 0.2971768  | 30   | 0.086637594 |
| 8526  | GO:0015112         | nitrate transmembran     | 0.12 | 3  | 0.44576523 | 61   | 0.1761631   |
| 8975  | GO:0015706 GO:0006 | nitrate transport        | 0.12 | 3  | 0.44576523 | 61   | 0.1761631   |
| 21058 | GO:0045454 GO:0036 | cell redox homeostasi    | 0.12 | 7  | 1.0401188  | 211  | 0.6093511   |
| 11931 | GO:0020037         | heme binding             | 0.12 | 15 | 2.228826   | 550  | 1.5883559   |
| 20514 | GO:0044264         | cellular polysaccharid   | 0.12 | 2  | 0.2971768  | 31   | 0.08952551  |
| 15949 | GO:0033554         | cellular response to st  | 0.12 | 6  | 0.89153045 | 173  | 0.49961013  |
| 3242  | GO:0004601 GO:0016 | peroxidase activity      | 0.12 | 5  | 0.74294204 | 135  | 0.38986918  |
| 9754  | GO:0016684         | oxidoreductase activit   | 0.12 | 5  | 0.74294204 | 135  | 0.38986918  |
| 5766  | GO:0008236         | serine-type peptidase    | 0.13 | 7  | 1.0401188  | 214  | 0.6180149   |
| 3717  | GO:0005199         | structural constituent c | 0.13 | 2  | 0.2971768  | 32   | 0.09241343  |
| 21041 | GO:0045431         | flavonol synthase activ  | 0.13 | 2  | 0.2971768  | 32   | 0.09241343  |
| 25836 | GO:0051552         | flavone metabolic prod   | 0.13 | 2  | 0.2971768  | 32   | 0.09241343  |
| 25837 | GO:0051553         | flavone biosynthetic p   | 0.13 | 2  | 0.2971768  | 32   | 0.09241343  |
| 25838 | GO:0051554         | flavonol metabolic pro   | 0.13 | 2  | 0.2971768  | 32   | 0.09241343  |
| 25839 | GO:0051555         | flavonol biosynthetic p  | 0.13 | 2  | 0.2971768  | 32   | 0.09241343  |
| 9293  | GO:0016051 GO:0006 | carbohydrate biosynth    | 0.13 | 3  | 0.44576523 | 64   | 0.18482687  |
| 3357  | GO:0004738         | pyruvate dehydrogena     | 0.13 | 1  | 0.1485884  | 7    | 0.020215439 |
| 3358  | GO:0004739         | pyruvate dehydrogena     | 0.13 | 1  | 0.1485884  | 7    | 0.020215439 |
| 3367  | GO:0004748 GO:0016 | ribonucleoside-diphos    | 0.13 | 7  | 0.1485884  | 7    | 0.020215439 |
| 4260  | GO:0006022         | aminoglycan metabolit    | 0.13 | 1  | 0.1485884  | 7    | 0.020215439 |
| 9786  | GO:0016725         | oxidoreductase activit   | 0.13 | 1  | 0.1485884  | 7    | 0.020215439 |
| 9789  | GO:0016728         | oxidoreductase activit   | 0.13 | 1  | 0.1485884  | 7    | 0.020215439 |
| 21107 | GO:0045505         | dynein intermediate ch   | 0.13 | 1  | 0.1485884  | 7    | 0.020215439 |
| 2632  | GO:0003682         | chromatin binding        | 0.13 | 2  | 0.2971768  | 33   | 0.09530135  |
| 4942  | GO:0006855         | drug transmembrane t     | 0.14 | 5  | 0.74294204 | 139  | 0.40142086  |
| 8607  | GO:0015197 GO:0015 | peptide transporter ac   | 0.14 | 5  | 0.74294204 | 139  | 0.40142086  |
| 8608  | GO:0015198         | oligopeptide transport   | 0.14 | 5  | 0.74294204 | 139  | 0.40142086  |
| 8642  | GO:0015238 GO:0015 | drug transmembrane t     | 0.14 | 5  | 0.74294204 | 139  | 0.40142086  |
| 9154  | GO:0015893         | drug transport           | 0.14 | 5  | 0.74294204 | 139  | 0.40142086  |
| 18832 | GO:0042493 GO:0017 | response to drug         | 0.14 | 5  | 0.74294204 | 139  | 0.40142086  |
| 25098 | GO:0050794 GO:0051 | regulation of cellular p | 0.14 | 87 | 12.927192  | 3987 | 11.514136   |
| 3872  | GO:0005506         | iron ion binding         | 0.14 | 15 | 2.228826   | 563  | 1.6258988   |
| 10103 | GO:0017171         | serine hydrolase activ   | 0.14 | 7  | 1.0401188  | 220  | 0.63534236  |
| 4944  | GO:0006857         | oligopeptide transport   | 0.14 | 5  | 0.74294204 | 141  | 0.4071967   |
| 9099  | GO:0015833         | peptide transport        | 0.14 | 5  | 0.74294204 | 141  | 0.4071967   |
| 3749  | GO:0005249         | voltage-gated potassi    | 0.14 | 2  | 0.2971768  | 34   | 0.09818927  |
| 5700  | GO:0008144         | drug binding             | 0.14 | 2  | 0.2971768  | 34   | 0.09818927  |
| 5827  | GO:0008308 GO:0022 | voltage-gated anion ch   | 0.14 | 2  | 0.2971768  | 34   | 0.09818927  |
| 20321 | GO:0044070         | regulation of anion tra  | 0.14 | 2  | 0.2971768  | 34   | 0.09818927  |
| 2932  | GO:0004130         | cytochrome-c peroxid     | 0.15 | 1  | 0.1485884  | 8    | 0.023103358 |
| 2935  | GO:0004133         | glycogen debranching     | 0.15 | 1  | 0.1485884  | 8    | 0.023103358 |
| 3280  | GO:0004645         | phosphorylase activity   | 0.15 | 1  | 0.1485884  | 8    | 0.023103358 |
| 3356  | GO:0004737         | pyruvate decarboxylas    | 0.15 | 1  | 0.1485884  | 8    | 0.023103358 |
| 3803  | GO:0005344 GO:0015 | oxygen transporter ac    | 0.15 | 1  | 0.1485884  | 8    | 0.023103358 |
| 4035  | GO:0005746         | mitochondrial respirat   | 0.15 | 1  | 0.1485884  | 8    | 0.023103358 |
| 4486  | GO:0006289 GO:0045 | nucleotide-excision re   | 0.15 | 1  | 0.1485884  | 8    | 0.023103358 |
| 4664  | GO:0006535         | cysteine biosynthetic p  | 0.15 | 1  | 0.1485884  | 8    | 0.023103358 |
| 5724  | GO:0008184         | glycogen phosphoryla     | 0.15 | 1  | 0.1485884  | 8    | 0.023103358 |
| 6613  | GO:0009250         | glucan biosynthetic pr   | 0.15 | 1  | 0.1485884  | 8    | 0.023103358 |
| 8940  | GO:0015669         | gas transport            | 0.15 | 1  | 0.1485884  | 8    | 0.023103358 |
| 8942  | GO:0015671         | oxygen transport         | 0.15 | 1  | 0.1485884  | 8    | 0.023103358 |
| 10057 | GO:0017110         | nucleoside-diphospha     | 0.15 | 1  | 0.1485884  | 8    | 0.023103358 |
| 12818 | GO:0030259         | lipid glycosylation      | 0.15 | 1  | 0.1485884  | 8    | 0.023103358 |
| 22702 | GO:0047209         | coniferyl-alcohol gluc   | 0.15 | 1  | 0.1485884  | 8    | 0.023103358 |
| 28833 | GO:0070469         | respiratory chain        | 0.15 | 1  | 0.1485884  | 8    | 0.023103358 |
| 29068 | GO:0070704         | sterol desaturase activ  | 0.15 | 1  | 0.1485884  | 8    | 0.023103358 |
| 30696 | GO:0072337         | modified amino acid tr   | 0.15 | 1  | 0.1485884  | 8    | 0.023103358 |
| 30708 | GO:0072349         | modified amino acid tr   | 0.15 | 1  | 0.1485884  | 8    | 0.023103358 |
| 4530  | GO:0006355 GO:0032 | regulation of transcript | 0.15 | 58 | 8.618128   | 2591 | 7.4826      |
| 25095 | GO:0050790         | regulation of catalytic  | 0.15 | 13 | 1.9316493  | 480  | 1.3862015   |
| 25544 | GO:0051252         | regulation of RNA met    | 0.15 | 58 | 8.618128   | 2593 | 7.488376    |
| 9722  | GO:0016641         | oxidoreductase activit   | 0.15 | 3  | 0.44576523 | 69   | 0.19926646  |
| 28366 | GO:0065009         | regulation of molecula   | 0.15 | 13 | 1.9316493  | 484  | 1.3977532   |
| 9185  | GO:0015925         | galactosidase activity   | 0.15 | 2  | 0.2971768  | 36   | 0.10396511  |
| 12626 | GO:0030029         | actin filament-based p   | 0.15 | 2  | 0.2971768  | 36   | 0.10396511  |
| 12633 | GO:0030036         | actin cytoskeleton org   | 0.15 | 2  | 0.2971768  | 36   | 0.10396511  |
| 7141  | GO:0009889         | regulation of biosynthe  | 0.16 | 58 | 8.618128   | 2605 | 7.523031    |
| 7772  | GO:0010556         | regulation of macromol   | 0.16 | 58 | 8.618128   | 2605 | 7.523031    |
| 13756 | GO:0031326         | regulation of cellular b | 0.16 | 58 | 8.618128   | 2605 | 7.523031    |
| 32213 | GO:2000112         | regulation of cellular m | 0.16 | 58 | 8.618128   | 2605 | 7.523031    |
| 3758  | GO:0005267         | potassium channel ac     | 0.16 | 2  | 0.2971768  | 37   | 0.10685303  |
| 2655  | GO:0003725         | double-stranded RNA      | 0.16 | 1  | 0.1485884  | 9    | 0.025991278 |
| 2837  | GO:0004028         | 3-chloroallyl aldehyde   | 0.16 | 1  | 0.1485884  | 9    | 0.025991278 |
| 19342 | GO:0043027         | caspase inhibitor activ  | 0.16 | 1  | 0.1485884  | 9    | 0.025991278 |
| 19343 | GO:0043028         | caspase regulator acti   | 0.16 | 1  | 0.1485884  | 9    | 0.025991278 |
| 19458 | GO:0043154 GO:0006 | negative regulation of   | 0.16 | 1  | 0.1485884  | 9    | 0.025991278 |
| 19579 | GO:0043281 GO:0043 | regulation of caspase    | 0.16 | 1  | 0.1485884  | 9    | 0.025991278 |
| 21104 | GO:0045502         | dynein binding           | 0.16 | 1  | 0.1485884  | 9    | 0.025991278 |
| 79    | GO:0000103 GO:0015 | sulfate assimilation     | 0.16 | 1  | 0.1485884  | 9    | 0.025991278 |
| 9740  | GO:0016667         | oxidoreductase activit   | 0.16 | 3  | 0.44576523 | 72   | 0.20793022  |
| 18953 | GO:0042623         | ATPase activity, coup    | 0.17 | 14 | 2.0802376  | 537  | 1.550813    |
| 5066  | GO:0007010         | cytoskeleton organiz     | 0.17 | 2  | 0.2971768  | 38   | 0.10974095  |
| 8588  | GO:0015175         | neutral amino acid tra   | 0.17 | 2  | 0.2971768  | 38   | 0.10974095  |
| 9073  | GO:0015804         | neutral amino acid tra   | 0.17 | 2  | 0.2971768  | 38   | 0.10974095  |
| 12538 | GO:0022843         | voltage-gated cation c   | 0.17 | 2  | 0.2971768  | 38   | 0.10974095  |
| 9703  | GO:0016620         | oxidoreductase activit   | 0.17 | 3  | 0.44576523 | 73   | 0.21081814  |
| 11695 | GO:0019725         | cellular homeostasis     | 0.17 | 7  | 1.0401188  | 234  | 0.67577326  |
| 7692  | GO:0010468         | regulation of gene exp   | 0.18 | 58 | 8.618128   | 2635 | 7.6096687   |



|       |                    |                           |      |    |            |      |             |
|-------|--------------------|---------------------------|------|----|------------|------|-------------|
| 2897  | GO:0004091 GO:0004 | carboxylesterase activ    | 0.18 | 6  | 0.89153045 | 194  | 0.5602564   |
| 3056  | GO:0004372         | glycine hydroxymethyl     | 0.18 | 1  | 0.1485884  | 10   | 0.0288792   |
| 3203  | GO:0004557         | alpha-galactosidase a     | 0.18 | 1  | 0.1485884  | 10   | 0.0288792   |
| 3362  | GO:0004743         | pyruvate kinase activi    | 0.18 | 1  | 0.1485884  | 10   | 0.0288792   |
| 4663  | GO:0006534         | cysteine metabolic pro    | 0.18 | 1  | 0.1485884  | 10   | 0.0288792   |
| 8470  | GO:0015037         | peptide disulfide oxid    | 0.18 | 1  | 0.1485884  | 10   | 0.0288792   |
| 8471  | GO:0015038         | glutathione disulfide o   | 0.18 | 1  | 0.1485884  | 10   | 0.0288792   |
| 9659  | GO:0016572         | histone phosphorylati     | 0.18 | 1  | 0.1485884  | 10   | 0.0288792   |
| 10220 | GO:0018105         | peptidyl-serine phosph    | 0.18 | 1  | 0.1485884  | 10   | 0.0288792   |
| 10320 | GO:0018209         | peptidyl-serine modifi    | 0.18 | 1  | 0.1485884  | 10   | 0.0288792   |
| 11205 | GO:0019202         | amino acid kinase acti    | 0.18 | 1  | 0.1485884  | 10   | 0.0288792   |
| 11337 | GO:0019344         | cysteine biosynthetic r   | 0.18 | 1  | 0.1485884  | 10   | 0.0288792   |
| 13472 | GO:0031013         | troponin I binding        | 0.18 | 1  | 0.1485884  | 10   | 0.0288792   |
| 17539 | GO:0035173         | histone kinase activity   | 0.18 | 1  | 0.1485884  | 10   | 0.0288792   |
| 17540 | GO:0035174         | histone serine kinase     | 0.18 | 1  | 0.1485884  | 10   | 0.0288792   |
| 17541 | GO:0035175 GO:0044 | histone kinase activity   | 0.18 | 1  | 0.1485884  | 10   | 0.0288792   |
| 17770 | GO:0035404         | histone-serine phosph     | 0.18 | 1  | 0.1485884  | 10   | 0.0288792   |
| 20239 | GO:0043987 GO:0043 | histone H3-S10 phosph     | 0.18 | 1  | 0.1485884  | 10   | 0.0288792   |
| 23419 | GO:0047938         | glucose-6-phosphate       | 0.18 | 1  | 0.1485884  | 10   | 0.0288792   |
| 26022 | GO:0051740         | ethylene binding          | 0.18 | 1  | 0.1485884  | 10   | 0.0288792   |
| 28451 | GO:0070085         | glycosylation             | 0.18 | 1  | 0.1485884  | 10   | 0.0288792   |
| 30687 | GO:0072328         | alkene binding            | 0.18 | 1  | 0.1485884  | 10   | 0.0288792   |
| 3627  | GO:0005085 GO:0008 | quanyl-nucleotide exc     | 0.18 | 3  | 0.44576523 | 75   | 0.21659398  |
| 9801  | GO:0016747         | transferase activity, tra | 0.18 | 12 | 1.7830609  | 456  | 1.3168914   |
| 7072  | GO:0009813         | flavonoid biosynthetic    | 0.18 | 2  | 0.2971768  | 40   | 0.1155168   |
| 18925 | GO:0042592         | homeostatic process       | 0.18 | 7  | 1.0401188  | 238  | 0.68732494  |
| 5663  | GO:0008094 GO:0004 | DNA-dependent ATPa        | 0.18 | 3  | 0.44576523 | 76   | 0.2194819   |
| 8494  | GO:0015075         | ion transmembrane tra     | 0.19 | 20 | 2.9717681  | 827  | 2.3883097   |
| 23515 | GO:0048037         | cofactor binding          | 0.19 | 9  | 1.3372957  | 327  | 0.94434977  |
| 9767  | GO:0016705         | oxidoreductase activit    | 0.19 | 9  | 1.3372957  | 329  | 0.95012563  |
| 5196  | GO:0007166         | cell surface receptor li  | 0.19 | 3  | 0.44576523 | 78   | 0.22525774  |
| 2791  | GO:0003973         | (S)-2-hydroxy-acid oxi    | 0.19 | 1  | 0.1485884  | 11   | 0.03176712  |
| 2989  | GO:0004301         | epoxide hydrolase acti    | 0.19 | 1  | 0.1485884  | 11   | 0.03176712  |
| 3202  | GO:0004556         | alpha-amylase activity    | 0.19 | 1  | 0.1485884  | 11   | 0.03176712  |
| 6288  | GO:0008891         | glycolate oxidase activ   | 0.19 | 1  | 0.1485884  | 11   | 0.03176712  |
| 9849  | GO:0016803         | ether hydrolase activit   | 0.19 | 1  | 0.1485884  | 11   | 0.03176712  |
| 11152 | GO:0019139 GO:0043 | cytokinin dehydrogena     | 0.19 | 1  | 0.1485884  | 11   | 0.03176712  |
| 3753  | GO:0005253         | anion channel activity    | 0.20 | 2  | 0.2971768  | 42   | 0.121292636 |
| 4874  | GO:0006767         | water-soluble vitamin     | 0.20 | 2  | 0.2971768  | 42   | 0.121292636 |
| 8461  | GO:0015020 GO:0003 | glucuronosyltransferas    | 0.20 | 2  | 0.2971768  | 42   | 0.121292636 |
| 18713 | GO:0042364         | water-soluble vitamin     | 0.20 | 2  | 0.2971768  | 42   | 0.121292636 |
| 27228 | GO:0060255         | regulation of macromol    | 0.20 | 58 | 8.618128   | 2660 | 7.6818666   |
| 16603 | GO:0034220         | ion transmembrane tra     | 0.20 | 20 | 2.9717681  | 833  | 2.4056373   |
| 131   | GO:0000166         | nucleotide binding        | 0.20 | 28 | 4.1604753  | 1213 | 3.5030468   |
| 8589  | GO:0015179         | L-amino acid transme      | 0.20 | 2  | 0.2971768  | 43   | 0.124180555 |
| 9076  | GO:0015807         | L-amino acid transpor     | 0.20 | 2  | 0.2971768  | 43   | 0.124180555 |
| 9875  | GO:0016836         | hydro-lyase activity      | 0.20 | 3  | 0.44576523 | 80   | 0.2310336   |
| 11221 | GO:0019219         | regulation of nucleoba    | 0.21 | 58 | 8.618128   | 2675 | 7.7251854   |
| 25468 | GO:0051171         | regulation of nitrogen    | 0.21 | 58 | 8.618128   | 2675 | 7.7251854   |
| 2838  | GO:0004029         | aldehyde dehydrogena      | 0.21 | 1  | 0.1485884  | 12   | 0.03465504  |
| 3037  | GO:0004353         | glutamate dehydrogen      | 0.21 | 1  | 0.1485884  | 12   | 0.03465504  |
| 3049  | GO:0004365         | glyceraldehyde-3-phos     | 0.21 | 1  | 0.1485884  | 12   | 0.03465504  |
| 3246  | GO:0004605         | phosphatidate cytidily    | 0.21 | 1  | 0.1485884  | 12   | 0.03465504  |
| 4217  | GO:0005977         | glycogen metabolic pr     | 0.21 | 1  | 0.1485884  | 12   | 0.03465504  |
| 4344  | GO:0006112         | energy reserve metab      | 0.21 | 1  | 0.1485884  | 12   | 0.03465504  |
| 6336  | GO:0008943         | glyceraldehyde-3-phos     | 0.21 | 1  | 0.1485884  | 12   | 0.03465504  |
| 6439  | GO:0009070         | serine family amino ac    | 0.21 | 1  | 0.1485884  | 12   | 0.03465504  |
| 21503 | GO:0045935         | positive regulation of r  | 0.21 | 1  | 0.1485884  | 12   | 0.03465504  |
| 25470 | GO:0051173         | positive regulation of r  | 0.21 | 1  | 0.1485884  | 12   | 0.03465504  |
| 25546 | GO:0051254         | positive regulation of R  | 0.21 | 1  | 0.1485884  | 12   | 0.03465504  |
| 37    | GO:0000049         | tRNA binding              | 0.21 | 1  | 0.1485884  | 12   | 0.03465504  |
| 4873  | GO:0006766         | vitamin metabolic pro     | 0.21 | 2  | 0.2971768  | 44   | 0.12706847  |
| 6477  | GO:0009110         | vitamin biosynthetic pr   | 0.21 | 2  | 0.2971768  | 44   | 0.12706847  |
| 7071  | GO:0009812         | flavonoid metabolic pr    | 0.21 | 2  | 0.2971768  | 44   | 0.12706847  |
| 12532 | GO:0022836         | gated channel activit     | 0.21 | 4  | 0.5943536  | 122  | 0.3523262   |
| 3630  | GO:0005088         | Ras guanyl-nucleotide     | 0.22 | 2  | 0.2971768  | 45   | 0.1299564   |
| 3787  | GO:0005319         | lipid transporter activit | 0.22 | 3  | 0.44576523 | 83   | 0.23969735  |
| 4912  | GO:0006813 GO:0015 | potassium ion transpo     | 0.22 | 3  | 0.44576523 | 84   | 0.24258527  |
| 30168 | GO:0071804         | cellular potassium ion    | 0.22 | 3  | 0.44576523 | 84   | 0.24258527  |
| 30169 | GO:0071805         | potassium ion transme     | 0.22 | 3  | 0.44576523 | 84   | 0.24258527  |
| 4357  | GO:0006139 GO:0055 | nucleobase, nucleosid     | 0.22 | 70 | 10.401189  | 3285 | 9.486816    |
| 2896  | GO:0004090         | carbonyl reductase (N     | 0.23 | 1  | 0.1485884  | 13   | 0.037542958 |
| 7551  | GO:0010327         | acetyl CoA:(Z)-3-hex      | 0.23 | 1  | 0.1485884  | 13   | 0.037542958 |
| 8149  | GO:0010941         | regulation of cell death  | 0.23 | 1  | 0.1485884  | 13   | 0.037542958 |
| 13443 | GO:0030984         | kininogen binding         | 0.23 | 1  | 0.1485884  | 13   | 0.037542958 |
| 19298 | GO:0042981         | regulation of apoptosis   | 0.23 | 1  | 0.1485884  | 13   | 0.037542958 |
| 19381 | GO:0043067 GO:0043 | regulation of program     | 0.23 | 1  | 0.1485884  | 13   | 0.037542958 |
| 6425  | GO:0009056         | catabolic process         | 0.24 | 24 | 3.5661218  | 1051 | 3.0352037   |
| 31465 | GO:0080090         | regulation of primary r   | 0.24 | 58 | 8.618128   | 2710 | 7.826263    |
| 2976  | GO:0004176 GO:0004 | ATP-dependent peptid      | 0.24 | 2  | 0.2971768  | 48   | 0.13862015  |
| 2977  | GO:0004177         | aminopeptidase activi     | 0.24 | 1  | 0.1485884  | 14   | 0.040430877 |
| 3204  | GO:0004558 GO:0004 | alpha-glucosidase act     | 0.24 | 1  | 0.1485884  | 14   | 0.040430877 |
| 3629  | GO:0005087         | Ran guanyl-nucleotide     | 0.24 | 1  | 0.1485884  | 14   | 0.040430877 |
| 5197  | GO:0007167         | enzyme linked recepto     | 0.24 | 1  | 0.1485884  | 14   | 0.040430877 |
| 5199  | GO:0007169         | transmembrane recep       | 0.24 | 1  | 0.1485884  | 14   | 0.040430877 |
| 7413  | GO:0010181         | FMN binding               | 0.24 | 1  | 0.1485884  | 14   | 0.040430877 |
| 9720  | GO:0016639         | oxidoreductase activit    | 0.24 | 1  | 0.1485884  | 14   | 0.040430877 |
| 9847  | GO:0016801         | hydrolase activity, acti  | 0.24 | 1  | 0.1485884  | 14   | 0.040430877 |
| 28373 | GO:0070006         | metalloaminopeptidas      | 0.24 | 1  | 0.1485884  | 14   | 0.040430877 |
| 3756  | GO:0005261 GO:0015 | cation channel activit    | 0.25 | 2  | 0.2971768  | 49   | 0.14150807  |
| 9725  | GO:0016645         | oxidoreductase activit    | 0.25 | 2  | 0.2971768  | 49   | 0.14150807  |
| 4605  | GO:0006457 GO:0007 | protein folding           | 0.25 | 5  | 0.74294204 | 173  | 0.49961013  |
| 8675  | GO:0015293         | symporter activity        | 0.25 | 5  | 0.74294204 | 173  | 0.49961013  |
| 13753 | GO:0031323         | regulation of cellular m  | 0.25 | 59 | 8.766716   | 2770 | 7.999538    |
| 8635  | GO:0015229         | L-ascorbic acid transp    | 0.26 | 1  | 0.1485884  | 15   | 0.043318797 |



|       |                   |                           |      |     |            |       |             |
|-------|-------------------|---------------------------|------|-----|------------|-------|-------------|
| 9144  | GO:0015882        | L-ascorbic acid transp    | 0.26 | 1   | 0.1485884  | 15    | 0.043318797 |
| 16081 | GO:0033692        | cellular polysaccharide   | 0.26 | 1   | 0.1485884  | 15    | 0.043318797 |
| 2758  | GO:0003924        | GTPase activity           | 0.26 | 4   | 0.5943536  | 132   | 0.3812054   |
| 4394  | GO:0006184        | GTP catabolic proces      | 0.26 | 4   | 0.5943536  | 132   | 0.3812054   |
| 21605 | GO:0046039        | GTP metabolic proces      | 0.26 | 4   | 0.5943536  | 132   | 0.3812054   |
| 4906  | GO:0006807        | nitrogen compound m       | 0.26 | 78  | 11.589896  | 3725  | 10.757502   |
| 19126 | GO:0042803        | protein homodimerizat     | 0.26 | 7   | 1.0401188  | 265   | 0.7652988   |
| 30207 | GO:0071843        | cellular component bic    | 0.26 | 2   | 0.2971768  | 51    | 0.14728391  |
| 9800  | GO:0016746        | transferase activity, tra | 0.26 | 12  | 1.7830609  | 498   | 1.438184    |
| 6965  | GO:0009699        | phenylpropanoid biosy     | 0.27 | 2   | 0.2971768  | 52    | 0.15017183  |
| 2667  | GO:0003777        | microtubule motor acti    | 0.27 | 1   | 0.1485884  | 16    | 0.046206716 |
| 3742  | GO:0005242        | inward rectifier potass   | 0.27 | 1   | 0.1485884  | 16    | 0.046206716 |
| 7178  | GO:0009927        | histidine phosphotrans    | 0.27 | 1   | 0.1485884  | 16    | 0.046206716 |
| 9189  | GO:0015929        | hexosaminidase activi     | 0.27 | 1   | 0.1485884  | 16    | 0.046206716 |
| 9727  | GO:0016647        | oxidoreductase activit    | 0.27 | 1   | 0.1485884  | 16    | 0.046206716 |
| 9797  | GO:0016742        | hydroxymethyl-, formy     | 0.27 | 1   | 0.1485884  | 16    | 0.046206716 |
| 9898  | GO:0016863        | intramolecular oxidore    | 0.27 | 1   | 0.1485884  | 16    | 0.046206716 |
| 13435 | GO:0030976        | thiamine pyrophospha      | 0.27 | 1   | 0.1485884  | 16    | 0.046206716 |
| 18757 | GO:0042409        | caffeoyl-CoA O-methyl     | 0.27 | 1   | 0.1485884  | 16    | 0.046206716 |
| 22110 | GO:0046592        | polyamine oxidase act     | 0.27 | 1   | 0.1485884  | 16    | 0.046206716 |
| 72    | GO:0000096        | sulfur amino acid meta    | 0.27 | 1   | 0.1485884  | 16    | 0.046206716 |
| 73    | GO:0000097        | sulfur amino acid bios    | 0.27 | 1   | 0.1485884  | 16    | 0.046206716 |
| 219   | GO:0000287        | magnesium ion bindin      | 0.27 | 1   | 0.1485884  | 16    | 0.046206716 |
| 2643  | GO:0003700 GO:000 | sequence-specific DN      | 0.27 | 31  | 4.6062407  | 1417  | 4.0921826   |
| 716   | GO:0001071        | nucleic acid binding tra  | 0.27 | 31  | 4.6062407  | 1417  | 4.0921826   |
| 8585  | GO:0015172        | acidic amino acid tran    | 0.28 | 1   | 0.1485884  | 17    | 0.049094636 |
| 9069  | GO:0015800        | acidic amino acid tran    | 0.28 | 1   | 0.1485884  | 17    | 0.049094636 |
| 2674  | GO:0003824        | catalytic activity        | 0.29 | 216 | 32.095097  | 10750 | 31.045137   |
| 3724  | GO:0005216        | ion channel activity      | 0.29 | 4   | 0.5943536  | 140   | 0.40430877  |
| 8676  | GO:0015294        | solute:cation symport     | 0.29 | 4   | 0.5943536  | 141   | 0.4071967   |
| 5767  | GO:0008237        | metallopeptidase activ    | 0.30 | 2   | 0.2971768  | 56    | 0.16172351  |
| 5765  | GO:0008235        | metalloexopeptidase a     | 0.30 | 1   | 0.1485884  | 18    | 0.051982556 |
| 6491  | GO:0009126        | purine nucleoside mor     | 0.30 | 1   | 0.1485884  | 18    | 0.051982556 |
| 6492  | GO:0009127        | purine nucleoside mor     | 0.30 | 1   | 0.1485884  | 18    | 0.051982556 |
| 6517  | GO:0009152        | purine ribonucleotide t   | 0.30 | 1   | 0.1485884  | 18    | 0.051982556 |
| 6531  | GO:0009167        | purine ribonucleoside     | 0.30 | 1   | 0.1485884  | 18    | 0.051982556 |
| 6532  | GO:0009168        | purine ribonucleoside     | 0.30 | 1   | 0.1485884  | 18    | 0.051982556 |
| 8469  | GO:0015036        | disulfide oxidoreducta    | 0.30 | 1   | 0.1485884  | 18    | 0.051982556 |
| 8662  | GO:0015271        | outward rectifier potas   | 0.30 | 1   | 0.1485884  | 18    | 0.051982556 |
| 22917 | GO:0047429        | nucleoside-triphospha     | 0.30 | 1   | 0.1485884  | 18    | 0.051982556 |
| 28931 | GO:0070567        | cytidyltransferase ac     | 0.30 | 1   | 0.1485884  | 18    | 0.051982556 |
| 17020 | GO:0034641        | cellular nitrogen comp    | 0.30 | 76  | 11.292719  | 3678  | 10.621769   |
| 5763  | GO:0008233        | peptidase activity        | 0.31 | 13  | 1.9316493  | 565   | 1.6316746   |
| 20531 | GO:0044281        | small molecule metab      | 0.31 | 38  | 5.6463594  | 1788  | 5.1636004   |
| 3290  | GO:0004656        | procollagen-proline 4-    | 0.31 | 1   | 0.1485884  | 19    | 0.054870475 |
| 11752 | GO:0019798        | procollagen-proline dic   | 0.31 | 1   | 0.1485884  | 19    | 0.054870475 |
| 13966 | GO:0031543        | peptidyl-proline dioxyc   | 0.31 | 1   | 0.1485884  | 19    | 0.054870475 |
| 13968 | GO:0031545        | peptidyl-proline 4-diox   | 0.31 | 1   | 0.1485884  | 19    | 0.054870475 |
| 4910  | GO:0006811        | ion transport             | 0.32 | 21  | 3.1203566  | 959   | 2.769515    |
| 2626  | GO:0003674 GO:000 | molecular_function        | 0.32 | 480 | 71.32243   | 24394 | 70.447914   |
| 2675  | GO:0003825        | alpha.alpha-trehalose-    | 0.32 | 1   | 0.1485884  | 20    | 0.0577584   |
| 3628  | GO:0005086        | ARF guanyl-nucleotid      | 0.32 | 1   | 0.1485884  | 20    | 0.0577584   |
| 9706  | GO:0016623        | oxidoreductase activit    | 0.32 | 1   | 0.1485884  | 20    | 0.0577584   |
| 9784  | GO:0016723        | oxidoreductase activit    | 0.32 | 1   | 0.1485884  | 20    | 0.0577584   |
| 24482 | GO:0050162        | oxalate oxidase activit   | 0.32 | 1   | 0.1485884  | 20    | 0.0577584   |
| 25477 | GO:0051180        | vitamin transport         | 0.32 | 1   | 0.1485884  | 20    | 0.0577584   |
| 25480 | GO:0051183        | vitamin transporter ac    | 0.32 | 1   | 0.1485884  | 20    | 0.0577584   |
| 122   | GO:0000154 GO:001 | rRNA modification         | 0.32 | 1   | 0.1485884  | 20    | 0.0577584   |
| 225   | GO:0000293        | ferric-chelate reductas   | 0.32 | 1   | 0.1485884  | 20    | 0.0577584   |
| 6964  | GO:0009698        | phenylpropanoid meta      | 0.33 | 2   | 0.2971768  | 60    | 0.17327519  |
| 8943  | GO:0015672        | monovalent inorganic      | 0.33 | 9   | 1.3372957  | 383   | 1.1060733   |
| 11426 | GO:0019438        | aromatic compound bind    | 0.33 | 4   | 0.5943536  | 149   | 0.43030006  |
| 2818  | GO:0004003        | ATP-dependent DNA         | 0.33 | 2   | 0.2971768  | 61    | 0.1761631   |
| 3474  | GO:0004869 GO:000 | cysteine-type endopept    | 0.34 | 1   | 0.1485884  | 21    | 0.060646318 |
| 3195  | GO:0004540        | ribonuclease activity     | 0.34 | 3   | 0.44576523 | 106   | 0.3061195   |
| 5213  | GO:0007186        | G-protein coupled rec     | 0.34 | 2   | 0.2971768  | 62    | 0.17905103  |
| 9697  | GO:0016614        | oxidoreductase activit    | 0.34 | 7   | 1.0401188  | 293   | 0.84616053  |
| 17016 | GO:0034637        | cellular carbohydrate t   | 0.35 | 2   | 0.2971768  | 63    | 0.18193895  |
| 6521  | GO:0009156        | ribonucleoside monop      | 0.35 | 1   | 0.1485884  | 22    | 0.06353424  |
| 6525  | GO:0009161        | ribonucleoside monop      | 0.35 | 1   | 0.1485884  | 22    | 0.06353424  |
| 7143  | GO:0009891        | positive regulation of t  | 0.35 | 1   | 0.1485884  | 22    | 0.06353424  |
| 8489  | GO:0015066        | alpha-amylase inhibit     | 0.35 | 1   | 0.1485884  | 22    | 0.06353424  |
| 8774  | GO:0015431        | glutathione S-conjugat    | 0.35 | 1   | 0.1485884  | 22    | 0.06353424  |
| 13031 | GO:0030544        | Hsp70 protein binding     | 0.35 | 1   | 0.1485884  | 22    | 0.06353424  |
| 13758 | GO:0031328        | positive regulation of c  | 0.35 | 1   | 0.1485884  | 22    | 0.06353424  |
| 24858 | GO:0050551        | myrcene synthase acti     | 0.35 | 1   | 0.1485884  | 22    | 0.06353424  |
| 30359 | GO:0071997        | glutathione S-conjugat    | 0.35 | 1   | 0.1485884  | 22    | 0.06353424  |
| 28378 | GO:0070011        | peptidase activity, acti  | 0.35 | 12  | 1.7830609  | 537   | 1.550813    |
| 9710  | GO:0016628        | oxidoreductase activit    | 0.36 | 2   | 0.2971768  | 65    | 0.18771479  |
| 2633  | GO:0003684        | damaged DNA binding       | 0.36 | 1   | 0.1485884  | 23    | 0.06642216  |
| 3662  | GO:0005126        | cytokine receptor bind    | 0.36 | 1   | 0.1485884  | 23    | 0.06642216  |
| 7527  | GO:0010302        | 2-oxoglutarate-depend     | 0.36 | 1   | 0.1485884  | 23    | 0.06642216  |
| 3626  | GO:0005083        | small GTPase regulat      | 0.37 | 3   | 0.44576523 | 111   | 0.3205591   |
| 3180  | GO:0004521        | endoribonuclease acti     | 0.37 | 2   | 0.2971768  | 66    | 0.1906027   |
| 9765  | GO:0016702        | oxidoreductase activit    | 0.37 | 2   | 0.2971768  | 66    | 0.1906027   |
| 11829 | GO:0019900        | kinase binding            | 0.37 | 2   | 0.2971768  | 66    | 0.1906027   |
| 2629  | GO:0003678 GO:000 | DNA helicase activity     | 0.38 | 2   | 0.2971768  | 67    | 0.19349062  |
| 8559  | GO:0015146        | pentose transmembra       | 0.38 | 1   | 0.1485884  | 24    | 0.06931008  |
| 8561  | GO:0015148        | D-xylose transmembra      | 0.38 | 1   | 0.1485884  | 24    | 0.06931008  |
| 8829  | GO:0015519        | D-xylose:hydrogen sy      | 0.38 | 1   | 0.1485884  | 24    | 0.06931008  |
| 9019  | GO:0015750        | pentose transport         | 0.38 | 1   | 0.1485884  | 24    | 0.06931008  |
| 9022  | GO:0015753        | D-xylose transport        | 0.38 | 1   | 0.1485884  | 24    | 0.06931008  |
| 9779  | GO:0016717        | oxidoreductase activit    | 0.38 | 1   | 0.1485884  | 24    | 0.06931008  |
| 20488 | GO:0044238        | primary metabolic pro     | 0.38 | 182 | 27.04309   | 9167  | 26.47356    |
| 9836  | GO:0016787        | hydrolase activity        | 0.39 | 75  | 11.144131  | 3723  | 10.751725   |



|       |                    |                           |      |    |            |      |             |
|-------|--------------------|---------------------------|------|----|------------|------|-------------|
| 3620  | GO:0005057         | receptor signaling prot   | 0.39 | 2  | 0.2971768  | 69   | 0.19926646  |
| 21710 | GO:0046148         | pigment biosynthetic p    | 0.39 | 2  | 0.2971768  | 69   | 0.19926646  |
| 2649  | GO:0003713         | transcription coactivat   | 0.40 | 2  | 0.2971768  | 70   | 0.20215438  |
| 5726  | GO:0008187         | poly-pyrimidine tract b   | 0.40 | 2  | 0.2971768  | 70   | 0.20215438  |
| 5788  | GO:0008266         | poly(U) RNA binding       | 0.40 | 2  | 0.2971768  | 70   | 0.20215438  |
| 3210  | GO:0004565         | beta-galactosidase ac     | 0.40 | 1  | 0.1485884  | 26   | 0.075085916 |
| 3415  | GO:0004805         | trehalose-phosphatas      | 0.40 | 1  | 0.1485884  | 26   | 0.075085916 |
| 7000  | GO:0009734         | auxin mediated signal     | 0.40 | 1  | 0.1485884  | 26   | 0.075085916 |
| 7540  | GO:0010315         | auxin efflux              | 0.40 | 1  | 0.1485884  | 26   | 0.075085916 |
| 7553  | GO:0010329         | auxin efflux transmeme    | 0.40 | 1  | 0.1485884  | 26   | 0.075085916 |
| 17147 | GO:0034768         | (E)-beta-ocimene synt     | 0.40 | 1  | 0.1485884  | 26   | 0.075085916 |
| 29729 | GO:0071365         | cellular response to al   | 0.40 | 1  | 0.1485884  | 26   | 0.075085916 |
| 126   | GO:0000160         | two-component signal      | 0.40 | 1  | 0.1485884  | 26   | 0.075085916 |
| 9764  | GO:0016701         | oxidoreductase activit    | 0.41 | 2  | 0.2971768  | 72   | 0.20793022  |
| 5018  | GO:0006950         | response to stress        | 0.41 | 13 | 1.9316493  | 611  | 1.764519    |
| 3631  | GO:0005089         | Rho guanyl-nucleotide     | 0.41 | 1  | 0.1485884  | 27   | 0.077973835 |
| 9389  | GO:0016160         | amylase activity          | 0.41 | 1  | 0.1485884  | 27   | 0.077973835 |
| 9541  | GO:0016413         | O-acetyltransferase ac    | 0.41 | 1  | 0.1485884  | 27   | 0.077973835 |
| 18786 | GO:0042440         | pigment metabolic pro     | 0.42 | 2  | 0.2971768  | 73   | 0.21081814  |
| 17617 | GO:0035251         | UDP-glucosyltransfera     | 0.42 | 5  | 0.74294204 | 218  | 0.62956655  |
| 3284  | GO:0004650         | polygalacturonase act     | 0.42 | 1  | 0.1485884  | 28   | 0.080861755 |
| 4374  | GO:0006164         | purine nucleotide bios    | 0.42 | 1  | 0.1485884  | 28   | 0.080861755 |
| 6079  | GO:0008654         | phospholipid biosynthe    | 0.42 | 1  | 0.1485884  | 28   | 0.080861755 |
| 7145  | GO:0009893         | positive regulation of r  | 0.42 | 1  | 0.1485884  | 28   | 0.080861755 |
| 7819  | GO:0010604         | positive regulation of r  | 0.42 | 1  | 0.1485884  | 28   | 0.080861755 |
| 8863  | GO:0015562         | efflux transmembrane      | 0.42 | 1  | 0.1485884  | 28   | 0.080861755 |
| 9238  | GO:0015980         | energy derivation by c    | 0.42 | 1  | 0.1485884  | 28   | 0.080861755 |
| 13144 | GO:0030674         | protein binding, bridgin  | 0.42 | 1  | 0.1485884  | 28   | 0.080861755 |
| 13755 | GO:0031325         | positive regulation of d  | 0.42 | 1  | 0.1485884  | 28   | 0.080861755 |
| 27064 | GO:0060090         | binding, bridging         | 0.42 | 1  | 0.1485884  | 28   | 0.080861755 |
| 139   | GO:0000175         | 3'-5'-exoribonuclease     | 0.42 | 1  | 0.1485884  | 28   | 0.080861755 |
| 4526  | GO:0006351 GO:0006 | transcription, DNA-dep    | 0.42 | 32 | 4.754829   | 1575 | 4.548474    |
| 15176 | GO:0032774         | RNA biosynthetic proc     | 0.42 | 32 | 4.754829   | 1575 | 4.548474    |
| 6884  | GO:0009607         | response to biotic stim   | 0.42 | 3  | 0.44576523 | 122  | 0.3523262   |
| 25195 | GO:0050896 GO:005  | response to stimulus      | 0.43 | 38 | 5.6463594  | 1881 | 5.432177    |
| 22049 | GO:0046527         | glucosyltransferase ac    | 0.43 | 6  | 0.89153045 | 270  | 0.77973837  |
| 3260  | GO:0004620         | phospholipase activity    | 0.43 | 3  | 0.44576523 | 123  | 0.35521415  |
| 2975  | GO:0004175 GO:0016 | endopeptidase activity    | 0.43 | 7  | 1.0401188  | 320  | 0.9241344   |
| 25510 | GO:0051213         | dioxygenase activity      | 0.43 | 2  | 0.2971768  | 75   | 0.21659398  |
| 3490  | GO:0004888 GO:0004 | transmembrane recep       | 0.43 | 12 | 1.7830609  | 571  | 1.6490022   |
| 4968  | GO:0006886         | intracellular protein tra | 0.43 | 1  | 0.1485884  | 29   | 0.083749674 |
| 16992 | GO:0034613 GO:0016 | cellular protein localiza | 0.43 | 1  | 0.1485884  | 29   | 0.083749674 |
| 29091 | GO:0070727         | cellular macromolecul     | 0.43 | 1  | 0.1485884  | 29   | 0.083749674 |
| 5732  | GO:0008194         | UDP-glycosyltransfera     | 0.44 | 7  | 1.0401188  | 322  | 0.9299102   |
| 6529  | GO:0009165         | nucleotide biosynthetic   | 0.44 | 2  | 0.2971768  | 77   | 0.22236982  |
| 2666  | GO:0003774         | motor activity            | 0.45 | 1  | 0.1485884  | 30   | 0.086637594 |
| 3518  | GO:0004930 GO:000  | G-protein coupled rec     | 0.45 | 1  | 0.1485884  | 30   | 0.086637594 |
| 6216  | GO:0008810         | cellulase activity        | 0.45 | 1  | 0.1485884  | 30   | 0.086637594 |
| 6488  | GO:0009123         | nucleoside monophos       | 0.45 | 1  | 0.1485884  | 30   | 0.086637594 |
| 6489  | GO:0009124         | nucleoside monophos       | 0.45 | 1  | 0.1485884  | 30   | 0.086637594 |
| 8683  | GO:0015301 GO:0015 | anion:anion antiporter    | 0.45 | 1  | 0.1485884  | 30   | 0.086637594 |
| 5681  | GO:0008116         | prostaglandin-I syntha    | 0.45 | 2  | 0.2971768  | 78   | 0.22525774  |
| 9909  | GO:0016877         | ligase activity, forming  | 0.45 | 2  | 0.2971768  | 78   | 0.22525774  |
| 25998 | GO:0051716         | cellular response to st   | 0.45 | 23 | 3.4175334  | 1138 | 3.2864528   |
| 19590 | GO:0043295         | glutathione binding       | 0.46 | 1  | 0.1485884  | 31   | 0.08952551  |
| 3190  | GO:0004532         | exoribonuclease activ     | 0.47 | 1  | 0.1485884  | 32   | 0.09241343  |
| 3265  | GO:0004630         | phospholipase D activ     | 0.47 | 1  | 0.1485884  | 32   | 0.09241343  |
| 6942  | GO:0009674         | potassium:sodium syr      | 0.47 | 1  | 0.1485884  | 32   | 0.09241343  |
| 9927  | GO:0016896         | exoribonuclease activ     | 0.47 | 1  | 0.1485884  | 32   | 0.09241343  |
| 12522 | GO:0022820         | potassium ion sympor      | 0.47 | 1  | 0.1485884  | 32   | 0.09241343  |
| 12833 | GO:0030275         | LRR domain binding        | 0.47 | 1  | 0.1485884  | 32   | 0.09241343  |
| 23914 | GO:0048522 GO:005  | positive regulation of d  | 0.47 | 1  | 0.1485884  | 32   | 0.09241343  |
| 30878 | GO:0072522         | purine-containing com     | 0.48 | 1  | 0.1485884  | 33   | 0.09530135  |
| 16738 | GO:0034357         | photosynthetic membe      | 0.48 | 2  | 0.2971768  | 83   | 0.23969735  |
| 4844  | GO:0006725         | cellular aromatic comp    | 0.49 | 4  | 0.5943536  | 185  | 0.53426516  |
| 9486  | GO:0016298         | lipase activity           | 0.49 | 4  | 0.5943536  | 185  | 0.53426516  |
| 9818  | GO:0016765 GO:0016 | transferase activity, tra | 0.49 | 4  | 0.5943536  | 185  | 0.53426516  |
| 2985  | GO:0004222         | metalloendopeptidase      | 0.49 | 1  | 0.1485884  | 34   | 0.09818927  |
| 6004  | GO:0008536         | Ran GTPase binding        | 0.49 | 1  | 0.1485884  | 34   | 0.09818927  |
| 4327  | GO:0006091         | generation of precursor   | 0.49 | 2  | 0.2971768  | 84   | 0.24258527  |
| 19125 | GO:0042802         | identical protein bindin  | 0.49 | 14 | 2.0802376  | 697  | 2.01288     |
| 4538  | GO:0006364 GO:0006 | rRNA processing           | 0.50 | 1  | 0.1485884  | 35   | 0.10107719  |
| 6355  | GO:0008970         | phospholipase A1 acti     | 0.50 | 1  | 0.1485884  | 35   | 0.10107719  |
| 9310  | GO:0016072         | rRNA metabolic proce      | 0.50 | 1  | 0.1485884  | 35   | 0.10107719  |
| 11206 | GO:0019203         | carbohydrate phospho      | 0.50 | 1  | 0.1485884  | 35   | 0.10107719  |
| 12817 | GO:0030258         | lipid modification        | 0.50 | 1  | 0.1485884  | 35   | 0.10107719  |
| 21146 | GO:0045544         | gibberellin 20-oxidase    | 0.50 | 1  | 0.1485884  | 35   | 0.10107719  |
| 23199 | GO:0047714         | galactolipase activity    | 0.50 | 1  | 0.1485884  | 35   | 0.10107719  |
| 2657  | GO:0003727 GO:0003 | single-stranded RNA t     | 0.50 | 4  | 0.5943536  | 188  | 0.54292893  |
| 5768  | GO:0008238         | exopeptidase activity     | 0.50 | 2  | 0.2971768  | 86   | 0.24836111  |
| 4916  | GO:0006818         | hydrogen transport        | 0.50 | 6  | 0.89153045 | 292  | 0.84327257  |
| 9246  | GO:0015992         | proton transport          | 0.50 | 6  | 0.89153045 | 292  | 0.84327257  |
| 4232  | GO:0005992         | trehalose biosynthetic    | 0.51 | 1  | 0.1485884  | 36   | 0.10396511  |
| 5902  | GO:0008408         | 3'-5' exonuclease acti    | 0.51 | 1  | 0.1485884  | 36   | 0.10396511  |
| 6794  | GO:0009505         | plant-type cell wall      | 0.51 | 1  | 0.1485884  | 36   | 0.10396511  |
| 8739  | GO:0015385 GO:0015 | sodium:hydrogen anti      | 0.51 | 1  | 0.1485884  | 36   | 0.10396511  |
| 9393  | GO:0016165         | lipoygenase activity      | 0.51 | 1  | 0.1485884  | 36   | 0.10396511  |
| 20649 | GO:0044455         | mitochondrial membra      | 0.51 | 1  | 0.1485884  | 36   | 0.10396511  |
| 4641  | GO:0006508         | proteolysis               | 0.51 | 19 | 2.8231797  | 965  | 2.7868426   |
| 3318  | GO:0004693 GO:0016 | cyclin-dependent prote    | 0.52 | 1  | 0.1485884  | 37   | 0.10685303  |
| 11202 | GO:0019199         | transmembrane recep       | 0.52 | 10 | 1.4858841  | 504  | 1.4555116   |
| 13164 | GO:0030695         | GTPase regulator acti     | 0.52 | 3  | 0.44576523 | 142  | 0.4100846   |
| 20630 | GO:0044436         | thylakoid part            | 0.52 | 2  | 0.2971768  | 90   | 0.2599128   |
| 4231  | GO:0005991         | trehalose metabolic pr    | 0.53 | 1  | 0.1485884  | 38   | 0.10974095  |
| 9308  | GO:0016070         | RNA metabolic proces      | 0.53 | 36 | 5.3491826  | 1855 | 5.3570914   |

|       |                    |                           |      |  |     |            |       |             |
|-------|--------------------|---------------------------|------|--|-----|------------|-------|-------------|
| 3644  | GO:0005102         | receptor binding          | 0.53 |  | 2   | 0.2971768  | 91    | 0.2628007   |
| 6784  | GO:0009451 GO:0016 | RNA modification          | 0.53 |  | 2   | 0.2971768  | 91    | 0.2628007   |
| 6623  | GO:0009260         | ribonucleotide biosynt    | 0.54 |  | 1   | 0.1485884  | 39    | 0.11262887  |
| 16785 | GO:0034404         | nucleobase, nucleosid     | 0.54 |  | 2   | 0.2971768  | 92    | 0.26568863  |
| 17033 | GO:0034654         | nucleobase, nucleosid     | 0.54 |  | 2   | 0.2971768  | 92    | 0.26568863  |
| 12805 | GO:0030246         | carbohydrate binding      | 0.54 |  | 5   | 0.74294204 | 251   | 0.7248679   |
| 3178  | GO:0004519         | endonuclease activity     | 0.54 |  | 7   | 1.0401188  | 356   | 1.0280994   |
| 9895  | GO:0016860         | intramolecular oxidore    | 0.54 |  | 3   | 0.44576523 | 146   | 0.42163628  |
| 20336 | GO:0044085         | cellular component bic    | 0.54 |  | 2   | 0.2971768  | 93    | 0.26857653  |
| 5891  | GO:0008395 GO:0008 | steroid hydroxylase ac    | 0.54 |  | 1   | 0.1485884  | 40    | 0.1155168   |
| 7021  | GO:0009755         | hormone-mediated sig      | 0.54 |  | 1   | 0.1485884  | 40    | 0.1155168   |
| 9843  | GO:0016796         | exonuclease activity, d   | 0.54 |  | 1   | 0.1485884  | 40    | 0.1155168   |
| 15271 | GO:0032870         | cellular response to ho   | 0.54 |  | 1   | 0.1485884  | 40    | 0.1155168   |
| 16446 | GO:0034062         | RNA polymerase activ      | 0.54 |  | 1   | 0.1485884  | 40    | 0.1155168   |
| 23910 | GO:0048518 GO:0043 | positive regulation of b  | 0.54 |  | 1   | 0.1485884  | 40    | 0.1155168   |
| 3808  | GO:0005351 GO:0005 | sugar:hydrogen symp       | 0.55 |  | 2   | 0.2971768  | 94    | 0.27146447  |
| 3835  | GO:0005402         | cation:sugar symporte     | 0.55 |  | 2   | 0.2971768  | 94    | 0.27146447  |
| 6863  | GO:0009579         | thylakoid                 | 0.55 |  | 2   | 0.2971768  | 94    | 0.27146447  |
| 22479 | GO:0046983         | protein dimerization ad   | 0.55 |  | 10  | 1.4858841  | 517   | 1.4930545   |
| 9829  | GO:0016779         | nucleotidyltransferase    | 0.55 |  | 3   | 0.44576523 | 148   | 0.42741212  |
| 22415 | GO:0046914         | transition metal ion bir  | 0.55 |  | 50  | 7.4294205  | 2599  | 7.5057034   |
| 31895 | GO:0090304         | nucleic acid metabolic    | 0.55 |  | 45  | 6.6864786  | 2340  | 6.7577324   |
| 11712 | GO:0019748         | secondary metabolic p     | 0.55 |  | 2   | 0.2971768  | 95    | 0.27435237  |
| 9874  | GO:0016835         | carbon-oxygen lyase a     | 0.55 |  | 4   | 0.5943536  | 202   | 0.5833598   |
| 6666  | GO:0009312         | oligosaccharide biosyn    | 0.56 |  | 1   | 0.1485884  | 42    | 0.121292636 |
| 9370  | GO:0016138         | glycoside biosynthetic    | 0.56 |  | 1   | 0.1485884  | 42    | 0.121292636 |
| 21880 | GO:0046351         | disaccharide biosynth     | 0.56 |  | 1   | 0.1485884  | 42    | 0.121292636 |
| 3200  | GO:0004553 GO:0016 | hydrolase activity, hyd   | 0.57 |  | 6   | 0.89153045 | 312   | 0.90103096  |
| 8679  | GO:0015297         | antipporter activity      | 0.57 |  | 3   | 0.44576523 | 152   | 0.4389638   |
| 8682  | GO:0015300         | solute:solute antiporte   | 0.57 |  | 3   | 0.44576523 | 152   | 0.4389638   |
| 27562 | GO:0060589         | nucleoside-triphospha     | 0.57 |  | 3   | 0.44576523 | 152   | 0.4389638   |
| 8677  | GO:0015295         | solute:hydrogen symp      | 0.57 |  | 2   | 0.2971768  | 98    | 0.28301615  |
| 8681  | GO:0015299         | solute:hydrogen antip     | 0.57 |  | 2   | 0.2971768  | 98    | 0.28301615  |
| 20619 | GO:0044425         | membrane part             | 0.57 |  | 29  | 4.309064   | 1523  | 4.398302    |
| 3307  | GO:0004675         | transmembrane recep       | 0.57 |  | 7   | 1.0401188  | 367   | 1.0598665   |
| 16851 | GO:0034470         | ncRNA processing          | 0.58 |  | 2   | 0.2971768  | 99    | 0.28590405  |
| 17039 | GO:0034660         | ncRNA metabolic prod      | 0.58 |  | 2   | 0.2971768  | 99    | 0.28590405  |
| 4954  | GO:0006869         | lipid transport           | 0.58 |  | 4   | 0.5943536  | 208   | 0.6006873   |
| 8085  | GO:0010876         | lipid localization        | 0.58 |  | 4   | 0.5943536  | 208   | 0.6006873   |
| 5797  | GO:0008276         | protein methyltransfer    | 0.58 |  | 1   | 0.1485884  | 44    | 0.12706847  |
| 9186  | GO:0015926         | glucosidase activity      | 0.58 |  | 1   | 0.1485884  | 44    | 0.12706847  |
| 9753  | GO:0016682         | oxidoreductase activit    | 0.58 |  | 1   | 0.1485884  | 44    | 0.12706847  |
| 29859 | GO:0071495         | cellular response to er   | 0.58 |  | 1   | 0.1485884  | 44    | 0.12706847  |
| 16430 | GO:0034046         | poly(G) RNA binding       | 0.58 |  | 20  | 0.2971768  | 100   | 0.28879198  |
| 7229  | GO:0009987 GO:0008 | cellular process          | 0.58 |  | 204 | 30.312037  | 10601 | 30.614838   |
| 8666  | GO:0015276         | ligand-gated ion chan     | 0.59 |  | 1   | 0.1485884  | 45    | 0.1299564   |
| 9893  | GO:0016857         | racemase and epimer       | 0.59 |  | 1   | 0.1485884  | 45    | 0.1299564   |
| 12530 | GO:0022834         | ligand-gated channel a    | 0.59 |  | 1   | 0.1485884  | 45    | 0.1299564   |
| 18956 | GO:0042626         | ATPase activity, coup     | 0.59 |  | 4   | 0.5943536  | 211   | 0.6093511   |
| 3177  | GO:0004518         | nuclease activity         | 0.59 |  | 8   | 1.1887072  | 427   | 1.2331418   |
| 9699  | GO:0016616         | oxidoreductase activit    | 0.59 |  | 5   | 0.74294204 | 266   | 0.7681867   |
| 9861  | GO:0016820         | hydrolase activity, acti  | 0.59 |  | 4   | 0.5943536  | 212   | 0.612239    |
| 4329  | GO:0006096 GO:0019 | glycolysis                | 0.59 |  | 1   | 0.1485884  | 46    | 0.13284431  |
| 6999  | GO:0009733         | response to auxin stim    | 0.59 |  | 1   | 0.1485884  | 46    | 0.13284431  |
| 12498 | GO:0022613         | ribonucleoprotein com     | 0.59 |  | 1   | 0.1485884  | 46    | 0.13284431  |
| 18614 | GO:0042254 GO:0007 | ribosome biogenesis       | 0.59 |  | 1   | 0.1485884  | 46    | 0.13284431  |
| 26845 | GO:0052689         | carboxylic ester hydro    | 0.60 |  | 10  | 1.4858841  | 538   | 1.5537009   |
| 3421  | GO:0004812 GO:0011 | aminoacyl-tRNA ligase     | 0.60 |  | 1   | 0.1485884  | 47    | 0.13573223  |
| 8497  | GO:0015079 GO:0022 | potassium ion transme     | 0.60 |  | 1   | 0.1485884  | 47    | 0.13573223  |
| 9907  | GO:0016875         | ligase activity, forming  | 0.60 |  | 1   | 0.1485884  | 47    | 0.13573223  |
| 9908  | GO:0016876         | ligase activity, forming  | 0.60 |  | 1   | 0.1485884  | 47    | 0.13573223  |
| 9709  | GO:0016627         | oxidoreductase activit    | 0.60 |  | 2   | 0.2971768  | 104   | 0.30034366  |
| 4849  | GO:0006730 GO:0019 | one-carbon metabolic      | 0.61 |  | 6   | 0.89153045 | 325   | 0.93857396  |
| 9869  | GO:0016829         | lyase activity            | 0.61 |  | 9   | 1.3372957  | 488   | 1.4093049   |
| 4188  | GO:0005938         | cell cortex               | 0.61 |  | 1   | 0.1485884  | 48    | 0.13862015  |
| 20642 | GO:0044448         | cell cortex part          | 0.61 |  | 1   | 0.1485884  | 48    | 0.13862015  |
| 28930 | GO:0070566         | adenylyltransferase ac    | 0.61 |  | 1   | 0.1485884  | 48    | 0.13862015  |
| 113   | GO:0000145         | exocyst                   | 0.61 |  | 1   | 0.1485884  | 48    | 0.13862015  |
| 18582 | GO:0042221         | response to chemical      | 0.62 |  | 6   | 0.89153045 | 328   | 0.94723773  |
| 3844  | GO:0005451         | monovalent cation:hyd     | 0.62 |  | 1   | 0.1485884  | 49    | 0.14150807  |
| 31421 | GO:0080044         | quercetin 7-O-glucosy     | 0.62 |  | 1   | 0.1485884  | 49    | 0.14150807  |
| 5055  | GO:0006996         | organelle organization    | 0.62 |  | 3   | 0.44576523 | 164   | 0.47361887  |
| 5909  | GO:0008415         | acyltransferase activit   | 0.62 |  | 6   | 0.89153045 | 330   | 0.95301354  |
| 4459  | GO:0006259 GO:0055 | DNA metabolic proces      | 0.62 |  | 9   | 1.3372957  | 493   | 1.4237444   |
| 3185  | GO:0004527 GO:0008 | exonuclease activity      | 0.63 |  | 1   | 0.1485884  | 50    | 0.14439599  |
| 4622  | GO:0006479         | protein methylation       | 0.63 |  | 1   | 0.1485884  | 50    | 0.14439599  |
| 5750  | GO:0008213         | protein alkylation        | 0.63 |  | 1   | 0.1485884  | 50    | 0.14439599  |
| 9783  | GO:0016722         | oxidoreductase activit    | 0.63 |  | 1   | 0.1485884  | 50    | 0.14439599  |
| 9993  | GO:0017016         | Ras GTPase binding        | 0.63 |  | 1   | 0.1485884  | 50    | 0.14439599  |
| 29674 | GO:0071310         | cellular response to or   | 0.63 |  | 1   | 0.1485884  | 50    | 0.14439599  |
| 13656 | GO:0031224         | intrinsic to membrane     | 0.63 |  | 22  | 3.268945   | 1193  | 3.4452884   |
| 22375 | GO:0046872         | metal ion binding         | 0.63 |  | 56  | 8.3209505  | 2985  | 8.6204405   |
| 7173  | GO:0009922         | fatty acid elongase ac    | 0.63 |  | 1   | 0.1485884  | 51    | 0.14728391  |
| 22410 | GO:0046907         | intracellular transport   | 0.63 |  | 1   | 0.1485884  | 51    | 0.14728391  |
| 25925 | GO:0051641         | cellular localization     | 0.63 |  | 1   | 0.1485884  | 51    | 0.14728391  |
| 25933 | GO:0051649         | establishment of local    | 0.63 |  | 1   | 0.1485884  | 51    | 0.14728391  |
| 5097  | GO:0007049         | cell cycle                | 0.64 |  | 1   | 0.1485884  | 52    | 0.15017183  |
| 20287 | GO:0044036         | cell wall macromolecu     | 0.64 |  | 1   | 0.1485884  | 52    | 0.15017183  |
| 9812  | GO:0016758         | transferase activity, tra | 0.64 |  | 9   | 1.3372957  | 501   | 1.4468478   |
| 19470 | GO:0043167         | ion binding               | 0.64 |  | 56  | 8.3209505  | 2997  | 8.655096    |
| 19472 | GO:0043169         | cation binding            | 0.64 |  | 56  | 8.3209505  | 2997  | 8.655096    |
| 5070  | GO:0007017         | microtubule-based pro     | 0.64 |  | 2   | 0.2971768  | 112   | 0.32344702  |
| 5071  | GO:0007018         | microtubule-based mc      | 0.64 |  | 2   | 0.2971768  | 112   | 0.32344702  |
| 8680  | GO:0015298         | solute:cation antiporte   | 0.64 |  | 2   | 0.2971768  | 112   | 0.32344702  |
| 9730  | GO:0016651         | oxidoreductase activit    | 0.64 |  | 2   | 0.2971768  | 112   | 0.32344702  |



|       |                       |                                                     |      |    |            |      |            |
|-------|-----------------------|-----------------------------------------------------|------|----|------------|------|------------|
| 29081 | GO:0070717            | poly-purine tract binding                           | 0.64 | 2  | 0.2971768  | 112  | 0.32344702 |
| 17024 | GO:0034645 GO:0034645 | cellular macromolecule                              | 0.65 | 37 | 5.4977713  | 1999 | 5.7729516  |
| 9750  | GO:0016679            | oxidoreductase activity                             | 0.65 | 1  | 0.1485884  | 53   | 0.15305975 |
| 29246 | GO:0070882            | cellular cell wall organization                     | 0.65 | 1  | 0.1485884  | 53   | 0.15305975 |
| 6428  | GO:0009059 GO:0043492 | macromolecule biosynthesis                          | 0.65 | 37 | 5.4977713  | 2003 | 5.7845035  |
| 30205 | GO:0071841            | cellular component organization                     | 0.65 | 5  | 0.74294204 | 285  | 0.8230572  |
| 3156  | GO:0004497            | monooxygenase activity                              | 0.65 | 3  | 0.44576523 | 172  | 0.49672222 |
| 29251 | GO:0070887            | cellular response to chemical stimulus              | 0.65 | 1  | 0.1485884  | 54   | 0.15594767 |
| 9267  | GO:0016021            | integral to membrane                                | 0.66 | 20 | 2.9717681  | 1103 | 3.1853757  |
| 3476  | GO:0004872 GO:0010001 | receptor activity                                   | 0.66 | 12 | 1.7830609  | 672  | 1.9406822  |
| 4224  | GO:0005984            | disaccharide metabolism                             | 0.67 | 1  | 0.1485884  | 56   | 0.16172351 |
| 9369  | GO:0016137            | glycoside metabolic process                         | 0.67 | 1  | 0.1485884  | 56   | 0.16172351 |
| 9883  | GO:0016846            | carbon-sulfur lyase activity                        | 0.67 | 1  | 0.1485884  | 56   | 0.16172351 |
| 13697 | GO:0031267            | small GTPase binding                                | 0.67 | 1  | 0.1485884  | 56   | 0.16172351 |
| 3955  | GO:0005634            | nucleus                                             | 0.67 | 26 | 3.8632987  | 1433 | 4.138389   |
| 20533 | GO:0044283            | small molecule biosynthesis                         | 0.67 | 6  | 0.89153045 | 347  | 1.0021082  |
| 3475  | GO:0004871 GO:0005082 | signal transducer activity                          | 0.67 | 14 | 2.0802376  | 787  | 2.2727928  |
| 27063 | GO:0060089            | molecular transducer activity                       | 0.67 | 14 | 2.0802376  | 787  | 2.2727928  |
| 25416 | GO:0051119            | sugar transmembrane transport                       | 0.67 | 2  | 0.2971768  | 118  | 0.34077454 |
| 19758 | GO:0043492            | ATPase activity, coupled                            | 0.67 | 4  | 0.5943536  | 235  | 0.67866117 |
| 5715  | GO:0008171            | O-methyltransferase activity                        | 0.67 | 1  | 0.1485884  | 57   | 0.16461143 |
| 7557  | GO:0010333            | terpene synthase activity                           | 0.67 | 1  | 0.1485884  | 57   | 0.16461143 |
| 9813  | GO:0016759            | cellulose synthase activity                         | 0.67 | 1  | 0.1485884  | 57   | 0.16461143 |
| 3877  | GO:0005516            | calmodulin binding                                  | 0.68 | 4  | 0.5943536  | 236  | 0.6815491  |
| 2628  | GO:0003677            | DNA binding                                         | 0.68 | 22 | 3.268945   | 1224 | 3.534814   |
| 9824  | GO:0016773            | phosphotransferase activity                         | 0.68 | 27 | 4.011887   | 1493 | 4.311664   |
| 3304  | GO:0004672 GO:0050822 | protein kinase activity                             | 0.68 | 24 | 3.5661218  | 1333 | 3.8495972  |
| 3323  | GO:0004702            | receptor signaling protein activity                 | 0.68 | 1  | 0.1485884  | 58   | 0.16749935 |
| 4913  | GO:0006814 GO:0006814 | sodium ion transport                                | 0.68 | 1  | 0.1485884  | 58   | 0.16749935 |
| 6665  | GO:0009311            | oligosaccharide metabolism                          | 0.68 | 1  | 0.1485884  | 58   | 0.16749935 |
| 8499  | GO:0015081 GO:0022827 | sodium ion transmembrane transport                  | 0.68 | 1  | 0.1485884  | 58   | 0.16749935 |
| 8558  | GO:0015145            | monosaccharide transport                            | 0.68 | 1  | 0.1485884  | 58   | 0.16749935 |
| 9018  | GO:0015749            | monosaccharide transport                            | 0.68 | 1  | 0.1485884  | 58   | 0.16749935 |
| 18086 | GO:0035725            | sodium ion transmembrane transport                  | 0.68 | 1  | 0.1485884  | 58   | 0.16749935 |
| 29800 | GO:0071436            | sodium ion export                                   | 0.68 | 1  | 0.1485884  | 58   | 0.16749935 |
| 30700 | GO:0072341            | modified amino acid biosynthesis                    | 0.69 | 1  | 0.1485884  | 59   | 0.17038727 |
| 5195  | GO:0007165 GO:0022827 | signal transduction                                 | 0.69 | 17 | 2.526003   | 961  | 2.775291   |
| 12602 | GO:0023052 GO:0022827 | signaling                                           | 0.69 | 17 | 2.526003   | 961  | 2.775291   |
| 9823  | GO:0016772            | transferase activity, transmembrane                 | 0.69 | 35 | 5.2005944  | 1932 | 5.579461   |
| 2980  | GO:0004185            | serine-type carboxypeptidase activity               | 0.69 | 1  | 0.1485884  | 60   | 0.17327519 |
| 5652  | GO:0008081 GO:0004185 | phosphoric diester hydrolase activity               | 0.69 | 1  | 0.1485884  | 60   | 0.17327519 |
| 14811 | GO:0032403            | protein complex binding                             | 0.69 | 1  | 0.1485884  | 60   | 0.17327519 |
| 25319 | GO:0051020            | GTPase binding                                      | 0.69 | 1  | 0.1485884  | 60   | 0.17327519 |
| 28375 | GO:0070008            | serine-type exopeptidase activity                   | 0.69 | 1  | 0.1485884  | 60   | 0.17327519 |
| 5610  | GO:0008026            | ATP-dependent helicase activity                     | 0.69 | 3  | 0.44576523 | 183  | 0.52848935 |
| 28401 | GO:0070035            | purine NTP-dependent helicase activity              | 0.69 | 3  | 0.44576523 | 183  | 0.52848935 |
| 4768  | GO:0006644            | phospholipid metabolism                             | 0.70 | 1  | 0.1485884  | 61   | 0.1761631  |
| 2978  | GO:0004180            | carboxypeptidase activity                           | 0.70 | 1  | 0.1485884  | 62   | 0.17905103 |
| 6018  | GO:0008559 GO:0005082 | xenobiotic-transporting activity                    | 0.70 | 1  | 0.1485884  | 62   | 0.17905103 |
| 11210 | GO:0019207            | kinase regulator activity                           | 0.70 | 1  | 0.1485884  | 62   | 0.17905103 |
| 17457 | GO:0035091            | phosphatidylinositol binding                        | 0.70 | 1  | 0.1485884  | 62   | 0.17905103 |
| 19225 | GO:0042908            | xenobiotic transport                                | 0.70 | 1  | 0.1485884  | 62   | 0.17905103 |
| 19227 | GO:0042910            | xenobiotic transporter activity                     | 0.70 | 1  | 0.1485884  | 62   | 0.17905103 |
| 2648  | GO:0003712            | transcription cofactor activity                     | 0.71 | 2  | 0.2971768  | 126  | 0.3638779  |
| 634   | GO:0000988            | protein binding transcription factor activity       | 0.71 | 2  | 0.2971768  | 126  | 0.3638779  |
| 635   | GO:0000989            | transcription factor binding                        | 0.71 | 2  | 0.2971768  | 126  | 0.3638779  |
| 20512 | GO:0044262 GO:0005082 | cellular carbohydrate transport                     | 0.71 | 4  | 0.5943536  | 248  | 0.7162041  |
| 3068  | GO:0004386            | helicase activity                                   | 0.71 | 3  | 0.44576523 | 189  | 0.54581684 |
| 25820 | GO:0051536            | iron-sulfur cluster binding                         | 0.72 | 1  | 0.1485884  | 64   | 0.18482687 |
| 25824 | GO:0051540            | metal cluster binding                               | 0.72 | 1  | 0.1485884  | 64   | 0.18482687 |
| 20521 | GO:0044271            | cellular nitrogen compound transport                | 0.72 | 6  | 0.89153045 | 367  | 1.0598665  |
| 5840  | GO:0008324            | cation transmembrane transport                      | 0.72 | 9  | 1.3372957  | 538  | 1.5537009  |
| 11616 | GO:0019637            | organophosphate metabolism                          | 0.72 | 1  | 0.1485884  | 65   | 0.18771479 |
| 4561  | GO:0006399            | tRNA metabolic process                              | 0.73 | 1  | 0.1485884  | 66   | 0.1906027  |
| 5615  | GO:0008033            | tRNA processing                                     | 0.73 | 1  | 0.1485884  | 66   | 0.1906027  |
| 9890  | GO:0016854            | racemase and epimerase activity                     | 0.73 | 1  | 0.1485884  | 66   | 0.1906027  |
| 30206 | GO:0071842            | cellular component organization                     | 0.73 | 3  | 0.44576523 | 193  | 0.5573685  |
| 9837  | GO:0016788            | hydrolase activity, acting on ester bonds           | 0.73 | 27 | 4.011887   | 1534 | 4.430069   |
| 6662  | GO:0009308            | amine metabolic process                             | 0.73 | 5  | 0.74294204 | 314  | 0.9068068  |
| 2999  | GO:0004312            | fatty acid synthase activity                        | 0.74 | 1  | 0.1485884  | 68   | 0.19637854 |
| 7691  | GO:0010467            | gene expression                                     | 0.74 | 35 | 5.2005944  | 1974 | 5.7007537  |
| 5809  | GO:0008289            | lipid binding                                       | 0.74 | 4  | 0.5943536  | 258  | 0.74508333 |
| 31420 | GO:0080043            | quercetin 3-O-glucosyltransferase activity          | 0.74 | 1  | 0.1485884  | 69   | 0.19926646 |
| 10244 | GO:0018130            | heterocycle biosynthesis                            | 0.75 | 3  | 0.44576523 | 199  | 0.57469606 |
| 8749  | GO:0015399            | primary active transmembrane transport              | 0.75 | 4  | 0.5943536  | 260  | 0.75085914 |
| 8753  | GO:0015405            | P-P-bond-hydrolysis-coupled transmembrane transport | 0.75 | 4  | 0.5943536  | 260  | 0.75085914 |
| 9853  | GO:0016811            | hydrolase activity, acting on ester bonds           | 0.75 | 1  | 0.1485884  | 70   | 0.20215438 |
| 9796  | GO:0016741            | transferase activity, transmembrane                 | 0.75 | 4  | 0.5943536  | 261  | 0.7537471  |
| 20499 | GO:0044249            | cellular biosynthetic process                       | 0.75 | 47 | 6.9836555  | 2635 | 7.6096687  |
| 6427  | GO:0009058            | biosynthetic process                                | 0.75 | 50 | 7.4294205  | 2796 | 8.074624   |
| 4612  | GO:0006468            | protein phosphorylation                             | 0.75 | 39 | 5.794948   | 2205 | 6.367863   |
| 3306  | GO:0004674 GO:0005082 | protein serine/threonine phosphorylation            | 0.76 | 18 | 2.6745913  | 1062 | 3.0669708  |
| 9839  | GO:0016791 GO:0016791 | phosphatase activity                                | 0.76 | 6  | 0.89153045 | 383  | 1.1060733  |
| 3895  | GO:0005543            | phospholipid binding                                | 0.76 | 2  | 0.2971768  | 140  | 0.40430877 |
| 9811  | GO:0016757 GO:0010001 | transferase activity, transmembrane                 | 0.76 | 12 | 1.7830609  | 729  | 2.1052935  |
| 4247  | GO:0006007            | glucose catabolic process                           | 0.76 | 1  | 0.1485884  | 73   | 0.21081814 |
| 11313 | GO:0019320            | hexose catabolic process                            | 0.76 | 1  | 0.1485884  | 73   | 0.21081814 |
| 20525 | GO:0044275            | cellular carbohydrate transport                     | 0.76 | 1  | 0.1485884  | 73   | 0.21081814 |
| 21726 | GO:0046164            | alcohol catabolic process                           | 0.76 | 1  | 0.1485884  | 73   | 0.21081814 |
| 21894 | GO:0046365            | monosaccharide catabolic process                    | 0.76 | 1  | 0.1485884  | 73   | 0.21081814 |
| 18912 | GO:0042578            | phosphoric ester hydrolysis                         | 0.76 | 7  | 1.0401188  | 444  | 1.2822365  |
| 6046  | GO:0008610            | lipid biosynthetic process                          | 0.76 | 2  | 0.2971768  | 141  | 0.4071967  |
| 8557  | GO:0015144            | carbohydrate transmembrane transport                | 0.77 | 2  | 0.2971768  | 143  | 0.41297254 |
| 16602 | GO:0034219            | carbohydrate transmembrane transport                | 0.77 | 2  | 0.2971768  | 143  | 0.41297254 |
| 8810  | GO:0015491            | cation:cation antiporter activity                   | 0.77 | 1  | 0.1485884  | 75   | 0.21659398 |

|       |                    |                          |      |     |            |      |            |
|-------|--------------------|--------------------------|------|-----|------------|------|------------|
| 9488  | GO:0016301         | kinase activity          | 0.78 | 30  | 4.457652   | 1740 | 5.0249805  |
| 3873  | GO:0005507         | copper ion binding       | 0.78 | 2   | 0.2971768  | 146  | 0.42163628 |
| 9493  | GO:0016310         | phosphorylation          | 0.78 | 44  | 6.53789    | 2504 | 7.2313514  |
| 9877  | GO:0016838         | carbon-oxygen lyase a    | 0.78 | 1   | 0.1485884  | 77   | 0.22236982 |
| 6071  | GO:0008643 GO:0006 | carbohydrate transport   | 0.78 | 2   | 0.2971768  | 147  | 0.42452422 |
| 2819  | GO:0004004         | ATP-dependent RNA        | 0.78 | 1   | 0.1485884  | 78   | 0.22525774 |
| 5725  | GO:0008186 GO:0004 | RNA-dependent ATPa       | 0.78 | 1   | 0.1485884  | 78   | 0.22525774 |
| 8495  | GO:0015077         | monovalent inorganic     | 0.79 | 3   | 0.44576523 | 214  | 0.6180149  |
| 4649  | GO:0006520 GO:0006 | cellular amino acid me   | 0.79 | 4   | 0.5943536  | 277  | 0.7999538  |
| 2654  | GO:0003724         | RNA helicase activity    | 0.79 | 1   | 0.1485884  | 80   | 0.2310336  |
| 9655  | GO:0016568         | chromatin modifier       | 0.79 | 1   | 0.1485884  | 80   | 0.2310336  |
| 9656  | GO:0016569         | covalent chromatin m     | 0.79 | 1   | 0.1485884  | 80   | 0.2310336  |
| 9657  | GO:0016570         | histone modification     | 0.79 | 1   | 0.1485884  | 80   | 0.2310336  |
| 9682  | GO:0016597         | amino acid binding       | 0.79 | 1   | 0.1485884  | 80   | 0.2310336  |
| 19479 | GO:0043176         | amine binding            | 0.79 | 1   | 0.1485884  | 80   | 0.2310336  |
| 9845  | GO:0016798         | hydrolase activity, acti | 0.79 | 6   | 0.89153045 | 401  | 1.1580559  |
| 9795  | GO:0016740         | transferase activity     | 0.80 | 67  | 9.955423   | 3764 | 10.870131  |
| 18674 | GO:0042325         | regulation of phosphor   | 0.80 | 1   | 0.1485884  | 81   | 0.23392151 |
| 6991  | GO:0009725         | response to hormone      | 0.80 | 1   | 0.1485884  | 82   | 0.23680943 |
| 4558  | GO:0006396 GO:0006 | RNA processing           | 0.80 | 3   | 0.44576523 | 219  | 0.63245445 |
| 3048  | GO:0004364         | glutathione transferase  | 0.81 | 1   | 0.1485884  | 84   | 0.24258527 |
| 5624  | GO:0008047         | enzyme activator activ   | 0.81 | 1   | 0.1485884  | 85   | 0.24547319 |
| 11222 | GO:0019220         | regulation of phosphat   | 0.81 | 1   | 0.1485884  | 85   | 0.24547319 |
| 25471 | GO:0051174         | regulation of phosphor   | 0.81 | 1   | 0.1485884  | 85   | 0.24547319 |
| 4460  | GO:0006260 GO:0055 | DNA replication          | 0.81 | 3   | 0.44576523 | 224  | 0.64689404 |
| 3888  | GO:0005529         | sugar binding            | 0.81 | 2   | 0.2971768  | 158  | 0.45629135 |
| 6985  | GO:0009719         | response to endogeno     | 0.82 | 1   | 0.1485884  | 86   | 0.24836111 |
| 4246  | GO:0006006         | glucose metabolic pro    | 0.82 | 1   | 0.1485884  | 87   | 0.25124902 |
| 4990  | GO:0006915 GO:0008 | apoptosis                | 0.82 | 3   | 0.44576523 | 227  | 0.6555578  |
| 8496  | GO:0015078         | hydrogen ion transme     | 0.82 | 2   | 0.2971768  | 160  | 0.4620672  |
| 4032  | GO:0005743         | mitochondrial inner me   | 0.82 | 1   | 0.1485884  | 88   | 0.25413695 |
| 119   | GO:0000151         | ubiquitin ligase comple  | 0.82 | 1   | 0.1485884  | 88   | 0.25413695 |
| 6796  | GO:0009507         | chloroplast              | 0.82 | 3   | 0.44576523 | 229  | 0.6613336  |
| 10304 | GO:0018193         | peptidyl-amino acid m    | 0.83 | 1   | 0.1485884  | 89   | 0.25702485 |
| 4911  | GO:0006812 GO:0006 | cation transport         | 0.83 | 10  | 1.4858841  | 662  | 1.9118029  |
| 9294  | GO:0016052 GO:0006 | carbohydrate catabolic   | 0.83 | 1   | 0.1485884  | 91   | 0.2628007  |
| 30204 | GO:0071840         | cellular component org   | 0.83 | 5   | 0.74294204 | 362  | 1.045427   |
| 4476  | GO:0006278         | RNA-dependent DNA        | 0.84 | 2   | 0.2971768  | 166  | 0.4793947  |
| 9494  | GO:0016311         | dephosphorylation        | 0.84 | 6   | 0.89153045 | 425  | 1.227366   |
| 11803 | GO:0019866         | organelle inner memb     | 0.84 | 1   | 0.1485884  | 94   | 0.27146447 |
| 20356 | GO:0044106         | cellular amine metabo    | 0.84 | 4   | 0.5943536  | 303  | 0.8750397  |
| 6077  | GO:0008652         | cellular amino acid bic  | 0.84 | 2   | 0.2971768  | 169  | 0.48805845 |
| 18633 | GO:0042277         | peptide binding          | 0.85 | 1   | 0.1485884  | 95   | 0.27435237 |
| 5756  | GO:0008219         | cell death               | 0.85 | 3   | 0.44576523 | 239  | 0.69021285 |
| 8209  | GO:0012501 GO:0018 | programmed cell deat     | 0.85 | 3   | 0.44576523 | 239  | 0.69021285 |
| 9462  | GO:0016265         | death                    | 0.85 | 3   | 0.44576523 | 239  | 0.69021285 |
| 3341  | GO:0004722 GO:0006 | protein serine/threonin  | 0.85 | 2   | 0.2971768  | 171  | 0.4938343  |
| 9889  | GO:0016853         | isomerase activity       | 0.85 | 4   | 0.5943536  | 306  | 0.8837035  |
| 4897  | GO:0006793         | phosphorus metabolic     | 0.85 | 50  | 7.4294205  | 2925 | 8.4471655  |
| 4900  | GO:0006796         | phosphate metabolic p    | 0.85 | 50  | 7.4294205  | 2925 | 8.4471655  |
| 5791  | GO:0008270         | zinc ion binding         | 0.85 | 31  | 4.6062407  | 1880 | 5.4292893  |
| 2653  | GO:0003723         | RNA binding              | 0.85 | 12  | 1.7830609  | 797  | 2.3016722  |
| 12608 | GO:0030001         | metal ion transport      | 0.85 | 5   | 0.74294204 | 374  | 1.080082   |
| 13829 | GO:0031406         | carboxylic acid binding  | 0.85 | 1   | 0.1485884  | 98   | 0.28301615 |
| 4067  | GO:0005783         | endoplasmic reticulum    | 0.85 | 2   | 0.2971768  | 174  | 0.50249803 |
| 5712  | GO:0008168 GO:0004 | methyltransferase acti   | 0.86 | 3   | 0.44576523 | 244  | 0.7046524  |
| 3885  | GO:0005525         | GTP binding              | 0.86 | 3   | 0.44576523 | 245  | 0.70754033 |
| 11032 | GO:0019001         | guanyl nucleotide bind   | 0.86 | 3   | 0.44576523 | 245  | 0.70754033 |
| 14967 | GO:0032561         | guanyl ribonucleotide    | 0.86 | 3   | 0.44576523 | 245  | 0.70754033 |
| 7271  | GO:0010033         | response to organic st   | 0.86 | 1   | 0.1485884  | 100  | 0.28879198 |
| 11787 | GO:0019842         | vitamin binding          | 0.86 | 2   | 0.2971768  | 177  | 0.5111618  |
| 6824  | GO:0009536         | plastid                  | 0.86 | 3   | 0.44576523 | 247  | 0.7133162  |
| 11311 | GO:0019318         | hexose metabolic prod    | 0.86 | 1   | 0.1485884  | 101  | 0.2916799  |
| 2627  | GO:0003676         | nucleic acid binding     | 0.86 | 41  | 6.092125   | 2453 | 7.0840673  |
| 13082 | GO:0030599         | pectinesterase activity  | 0.86 | 2   | 0.2971768  | 178  | 0.5140497  |
| 6166  | GO:0008757         | S-adenosylmethionine     | 0.87 | 2   | 0.2971768  | 180  | 0.5198256  |
| 6663  | GO:0009309         | amine biosynthetic pro   | 0.87 | 2   | 0.2971768  | 181  | 0.5227135  |
| 19392 | GO:0043085         | positive regulation of d | 0.87 | 1   | 0.1485884  | 104  | 0.30034366 |
| 20343 | GO:0044093         | positive regulation of r | 0.87 | 1   | 0.1485884  | 104  | 0.30034366 |
| 2668  | GO:0003779         | actin binding            | 0.87 | 1   | 0.1485884  | 105  | 0.3032316  |
| 20505 | GO:0044255         | cellular lipid metabolic | 0.88 | 2   | 0.2971768  | 184  | 0.53137726 |
| 20487 | GO:0044237         | cellular metabolic prod  | 0.88 | 147 | 21.842497  | 8185 | 23.637625  |
| 3942  | GO:0005618         | cell wall                | 0.88 | 1   | 0.1485884  | 107  | 0.30900744 |
| 19473 | GO:0043170 GO:0043 | macromolecule metab      | 0.88 | 116 | 17.236256  | 6553 | 18.92454   |
| 11833 | GO:0019904         | protein domain speci     | 0.88 | 1   | 0.1485884  | 109  | 0.31478328 |
| 9285  | GO:0016043         | cellular component org   | 0.88 | 3   | 0.44576523 | 261  | 0.7537471  |
| 15436 | GO:0033036         | macromolecule localiz    | 0.89 | 5   | 0.74294204 | 397  | 1.1465042  |
| 12868 | GO:0030312         | external encapsulating   | 0.89 | 1   | 0.1485884  | 111  | 0.3205591  |
| 4512  | GO:0006325         | chromatin organization   | 0.89 | 1   | 0.1485884  | 112  | 0.32344702 |
| 25568 | GO:0051276 GO:0007 | chromosome organiza      | 0.89 | 1   | 0.1485884  | 112  | 0.32344702 |
| 29918 | GO:0071554         | cell wall organization d | 0.89 | 1   | 0.1485884  | 112  | 0.32344702 |
| 19686 | GO:0043414         | macromolecule methy      | 0.89 | 1   | 0.1485884  | 113  | 0.32633495 |
| 14379 | GO:0031966         | mitochondrial membra     | 0.89 | 1   | 0.1485884  | 114  | 0.32922286 |
| 22478 | GO:0046982         | protein heterodimeriza   | 0.89 | 1   | 0.1485884  | 114  | 0.32922286 |
| 9535  | GO:0016407         | acetyltransferase activ  | 0.90 | 1   | 0.1485884  | 115  | 0.3321108  |
| 9871  | GO:0016831         | carboxy-lyase activity   | 0.90 | 1   | 0.1485884  | 115  | 0.3321108  |
| 20510 | GO:0044260 GO:0034 | cellular macromolecul    | 0.90 | 97  | 14.413075  | 5577 | 16.105928  |
| 3340  | GO:0004721         | phosphoprotein phosph    | 0.90 | 2   | 0.2971768  | 199  | 0.57469606 |
| 4236  | GO:0005996         | monosaccharide meta      | 0.91 | 1   | 0.1485884  | 125  | 0.36099    |
| 12741 | GO:0030170         | pyridoxal phosphate b    | 0.92 | 1   | 0.1485884  | 126  | 0.3638779  |
| 28643 | GO:0070279         | vitamin B6 binding       | 0.92 | 1   | 0.1485884  | 126  | 0.3638779  |
| 14667 | GO:0032259         | methylation              | 0.92 | 3   | 0.44576523 | 285  | 0.8230572  |
| 9295  | GO:0016053         | organic acid biosynthe   | 0.92 | 2   | 0.2971768  | 211  | 0.6093511  |
| 21922 | GO:0046394         | carboxylic acid biosyn   | 0.92 | 2   | 0.2971768  | 211  | 0.6093511  |
| 22376 | GO:0046873         | metal ion transmembr     | 0.92 | 2   | 0.2971768  | 213  | 0.6151269  |



|       |                    |                          |      |     |            |       |            |
|-------|--------------------|--------------------------|------|-----|------------|-------|------------|
| 9852  | GO:0016810         | hydrolase activity, acti | 0.93 | 1   | 0.1485884  | 134   | 0.38698125 |
| 4320  | GO:0006082         | organic acid metabolic   | 0.93 | 4   | 0.5943536  | 369   | 1.0656425  |
| 11716 | GO:0019752         | carboxylic acid metab    | 0.93 | 4   | 0.5943536  | 369   | 1.0656425  |
| 19707 | GO:0043436         | oxoacid metabolic pro    | 0.93 | 4   | 0.5943536  | 369   | 1.0656425  |
| 5019  | GO:0006952 GO:0002 | defense response         | 0.93 | 2   | 0.2971768  | 221   | 0.63823026 |
| 18541 | GO:0042180         | cellular ketone metabo   | 0.93 | 4   | 0.5943536  | 375   | 1.0829699  |
| 13531 | GO:0031072         | heat shock protein bin   | 0.94 | 2   | 0.2971768  | 230   | 0.6642216  |
| 4304  | GO:0006066         | alcohol metabolic proc   | 0.94 | 1   | 0.1485884  | 143   | 0.41297254 |
| 11522 | GO:0019538 GO:0006 | protein metabolic proc   | 0.94 | 68  | 10.104012  | 4134  | 11.938661  |
| 4029  | GO:0005740         | mitochondrial envelop    | 0.95 | 1   | 0.1485884  | 151   | 0.4360759  |
| 19526 | GO:0043227         | membrane-bounded o       | 0.95 | 32  | 4.754829   | 2142  | 6.185924   |
| 19530 | GO:0043231         | intracellular membran    | 0.95 | 32  | 4.754829   | 2142  | 6.185924   |
| 3449  | GO:0004842 GO:0004 | ubiquitin-protein ligase | 0.95 | 3   | 0.44576523 | 326   | 0.94146186 |
| 4609  | GO:0006464         | protein modification pr  | 0.95 | 43  | 6.389302   | 2781  | 8.031305   |
| 5661  | GO:0008092         | cytoskeletal protein bir | 0.96 | 2   | 0.2971768  | 249   | 0.719092   |
| 19684 | GO:0043412         | macromolecule modifi     | 0.96 | 45  | 6.6864786  | 2900  | 8.374968   |
| 19831 | GO:0043565         | sequence-specific DN     | 0.96 | 1   | 0.1485884  | 159   | 0.45917925 |
| 9654  | GO:0016567         | protein ubiquitination   | 0.96 | 3   | 0.44576523 | 332   | 0.9587894  |
| 12572 | GO:0022890 GO:0013 | inorganic cation transp  | 0.96 | 3   | 0.44576523 | 332   | 0.9587894  |
| 14854 | GO:0032446         | protein modification by  | 0.96 | 3   | 0.44576523 | 332   | 0.9587894  |
| 29011 | GO:0070647         | protein modification by  | 0.96 | 3   | 0.44576523 | 332   | 0.9587894  |
| 9870  | GO:0016830         | carbon-carbon lyase a    | 0.96 | 1   | 0.1485884  | 161   | 0.4649551  |
| 5764  | GO:0008234 GO:0004 | cysteine-type peptidas   | 0.96 | 1   | 0.1485884  | 163   | 0.47073093 |
| 20623 | GO:0044429         | mitochondrial part       | 0.96 | 1   | 0.1485884  | 165   | 0.47650677 |
| 11747 | GO:0019787 GO:0006 | small conjugating prot   | 0.96 | 3   | 0.44576523 | 339   | 0.9790048  |
| 30306 | GO:0071944         | cell periphery           | 0.96 | 2   | 0.2971768  | 259   | 0.74797124 |
| 3946  | GO:0005623         | cell                     | 0.97 | 140 | 20.802378  | 8227  | 23.758917  |
| 20657 | GO:0044464         | cell part                | 0.97 | 140 | 20.802378  | 8227  | 23.758917  |
| 3874  | GO:0005509         | calcium ion binding      | 0.97 | 2   | 0.2971768  | 279   | 0.8057296  |
| 8466  | GO:0015031 GO:0013 | protein transport        | 0.97 | 1   | 0.1485884  | 185   | 0.53426516 |
| 20820 | GO:0045184         | establishment of prote   | 0.97 | 1   | 0.1485884  | 185   | 0.53426516 |
| 20517 | GO:0044267         | cellular protein metabo  | 0.97 | 49  | 7.2808323  | 3225  | 9.313541   |
| 3863  | GO:0005488         | binding                  | 0.98 | 246 | 36.55275   | 13903 | 40.15075   |
| 5669  | GO:0008104         | protein localization     | 0.98 | 1   | 0.1485884  | 189   | 0.54581684 |
| 9906  | GO:0016874         | ligase activity          | 0.98 | 6   | 0.89153045 | 597   | 1.7240882  |
| 14380 | GO:0031967         | organelle envelope       | 0.98 | 1   | 0.1485884  | 201   | 0.5804719  |
| 14387 | GO:0031975         | envelope                 | 0.98 | 1   | 0.1485884  | 205   | 0.59202355 |
| 9913  | GO:0016881         | acid-amino acid ligase   | 0.98 | 3   | 0.44576523 | 391   | 1.1291766  |
| 4028  | GO:0005739         | mitochondrion            | 0.99 | 1   | 0.1485884  | 219   | 0.63245445 |
| 13547 | GO:0031090         | organelle membrane       | 0.99 | 1   | 0.1485884  | 224   | 0.64689404 |
| 3903  | GO:0005575 GO:0006 | cellular component       | 0.99 | 140 | 20.802378  | 8515  | 24.590637  |
| 9911  | GO:0016879         | ligase activity, forming | 0.99 | 3   | 0.44576523 | 456   | 1.3168914  |
| 3716  | GO:0005198         | structural molecule ac   | 1.00 | 2   | 0.2971768  | 393   | 1.1349525  |
| 3876  | GO:0005515 GO:0045 | protein binding          | 1.00 | 108 | 16.047548  | 6933  | 20.021948  |
| 19533 | GO:0043234         | protein complex          | 1.00 | 5   | 0.74294204 | 848   | 2.448956   |
| 19525 | GO:0043226         | organelle                | 1.00 | 34  | 5.052006   | 3013  | 8.701303   |
| 19528 | GO:0043229         | intracellular organelle  | 1.00 | 34  | 5.052006   | 3013  | 8.701303   |
| 20618 | GO:0044424         | intracellular part       | 1.00 | 47  | 6.9836555  | 3853  | 11.127155  |
| 4027  | GO:0005737         | cytoplasm                | 1.00 | 18  | 2.6745913  | 2001  | 5.7787275  |
| 3945  | GO:0005622         | intracellular            | 1.00 | 59  | 8.766716   | 4751  | 13.720507  |
| 4109  | GO:0005840 GO:0033 | ribosome                 | 1.00 | 2   | 0.2971768  | 682   | 1.9695613  |
| 13018 | GO:0030529         | ribonucleoprotein com    | 1.00 | 2   | 0.2971768  | 741   | 2.1399486  |
| 20640 | GO:0044446         | intracellular organelle  | 1.00 | 1   | 0.1485884  | 710   | 2.0504231  |
| 20616 | GO:0044422         | organelle part           | 1.00 | 1   | 0.1485884  | 712   | 2.0561988  |
| 19527 | GO:0043228         | non-membrane-bound       | 1.00 | 2   | 0.2971768  | 923   | 2.66555    |
| 19531 | GO:0043232         | intracellular non-mem    | 1.00 | 2   | 0.2971768  | 923   | 2.66555    |
| 20638 | GO:0044444         | cytoplasmic part         | 1.00 | 9   | 1.3372957  | 1644  | 4.7477403  |
| 15392 | GO:0032991         | macromolecular comp      | 1.00 | 7   | 1.0401188  | 1616  | 4.666878   |

| GO ID | GO ACCESSION          | GO Term                         | p-value | Count in Selection | % Count in Selection | Count in Total | % Count in Total |
|-------|-----------------------|---------------------------------|---------|--------------------|----------------------|----------------|------------------|
| 5704  | GO:008150 GO:000004   | biological process              | 0.00    | 449                | 72.41936             | 22215          | 64.155136        |
| 28101 | GO:0061135            | endopeptidase regulator acti    | 0.00    | 10                 | 1.6129032            | 95             | 0.27435237       |
| 8159  | GO:0010951            | negative regulation of endop    | 0.00    | 10                 | 1.6129032            | 95             | 0.27435237       |
| 3472  | GO:0004866            | endopeptidase inhibitor activ   | 0.00    | 10                 | 1.6129032            | 95             | 0.27435237       |
| 26712 | GO:0052548            | regulation of endopeptidase     | 0.00    | 10                 | 1.6129032            | 95             | 0.27435237       |
| 3473  | GO:0004867            | serine-type endopeptidase ir    | 0.00    | 8                  | 1.2903225            | 66             | 0.1906027        |
| 25636 | GO:0051346            | negative regulation of hydroly  | 0.00    | 10                 | 1.6129032            | 110            | 0.31767118       |
| 12946 | GO:0030414            | peptidase inhibitor activity    | 0.00    | 10                 | 1.6129032            | 110            | 0.31767118       |
| 7690  | GO:0010466            | negative regulation of peptid   | 0.00    | 10                 | 1.6129032            | 110            | 0.31767118       |
| 26711 | GO:0052547            | regulation of peptidase activ   | 0.00    | 10                 | 1.6129032            | 112            | 0.32344702       |
| 28100 | GO:0061134            | peptidase regulator activity    | 0.00    | 10                 | 1.6129032            | 112            | 0.32344702       |
| 3874  | GO:0005509            | calcium ion binding             | 0.00    | 16                 | 2.580645             | 279            | 0.8057296        |
| 25626 | GO:0051336            | regulation of hydrolase activ   | 0.00    | 12                 | 1.9354838            | 196            | 0.5660323        |
| 3167  | GO:0004508            | steroid 17-alpha-monooxyge      | 0.00    | 2                  | 0.32258064           | 2              | 0.00577584       |
| 3464  | GO:0004857            | enzyme inhibitor activity       | 0.00    | 10                 | 1.6129032            | 157            | 0.4534034        |
| 3048  | GO:0004364            | glutathione transferase activ   | 0.00    | 7                  | 1.1290323            | 84             | 0.24258527       |
| 4476  | GO:0006278            | RNA-dependent DNA replica       | 0.00    | 10                 | 1.6129032            | 166            | 0.4793947        |
| 3877  | GO:0005516            | calmodulin binding              | 0.00    | 12                 | 1.9354838            | 236            | 0.6815491        |
| 8919  | GO:0015645            | fatty acid ligase activity      | 0.00    | 4                  | 0.6451613            | 27             | 0.077973835      |
| 9816  | GO:0016762            | xyloglucan:xyloglucosyl trans   | 0.00    | 4                  | 0.6451613            | 27             | 0.077973835      |
| 9869  | GO:0016829            | lyase activity                  | 0.00    | 19                 | 3.064516             | 488            | 1.4093049        |
| 6932  | GO:0009664            | plant-type cell wall organizat  | 0.00    | 5                  | 0.8064516            | 50             | 0.14439599       |
| 5096  | GO:0007047            | cellular cell wall organization | 0.00    | 5                  | 0.8064516            | 50             | 0.14439599       |
| 20857 | GO:0045229            | external encapsulating struct   | 0.00    | 5                  | 0.8064516            | 50             | 0.14439599       |
| 30033 | GO:0071669            | plant-type cell wall organizat  | 0.00    | 5                  | 0.8064516            | 50             | 0.14439599       |
| 12805 | GO:0030246            | carbohydrate binding            | 0.00    | 12                 | 1.9354838            | 251            | 0.7248679        |
| 19393 | GO:0043086            | negative regulation of catalyt  | 0.00    | 10                 | 1.6129032            | 188            | 0.54292893       |
| 20342 | GO:0044092            | negative regulation of molec    | 0.00    | 10                 | 1.6129032            | 188            | 0.54292893       |
| 14101 | GO:0031683            | G-protein beta/gamma-subu       | 0.00    | 3                  | 0.48387095           | 15             | 0.043318797      |
| 4460  | GO:0006260 GO:0055133 | DNA replication                 | 0.00    | 11                 | 1.7741935            | 224            | 0.64689404       |
| 29246 | GO:0070882            | cellular cell wall organization | 0.00    | 5                  | 0.8064516            | 53             | 0.15035975       |
| 9422  | GO:0016209            | antioxidant activity            | 0.00    | 9                  | 1.451613             | 165            | 0.47650677       |
| 3242  | GO:0004601 GO:0016685 | peroxidase activity             | 0.00    | 8                  | 1.2903225            | 135            | 0.38986918       |
| 9754  | GO:0016684            | oxidoreductase activity, actin  | 0.00    | 8                  | 1.2903225            | 135            | 0.38986918       |
| 11224 | GO:0019222            | regulation of metabolic proc    | 0.00    | 76                 | 12.258064            | 3115           | 8.995871         |
| 4459  | GO:0006259 GO:0055132 | DNA metabolic process           | 0.00    | 18                 | 2.903226             | 493            | 1.4237444        |
| 29919 | GO:0071555            | cell wall organization          | 0.00    | 5                  | 0.8064516            | 58             | 0.16749935       |
| 9393  | GO:0016165            | lipoygenase activity            | 0.00    | 4                  | 0.6451613            | 36             | 0.10396511       |
| 29918 | GO:0071554            | cell wall organization or biog  | 0.00    | 7                  | 1.1290323            | 112            | 0.32344702       |
| 8096  | GO:0015828            | tyrosine transport              | 0.00    | 2                  | 0.32258064           | 6              | 0.01732752       |
| 8586  | GO:0015173            | aromatic amino acid transme     | 0.00    | 2                  | 0.32258064           | 6              | 0.01732752       |
| 9070  | GO:0015801            | aromatic amino acid transpo     | 0.00    | 2                  | 0.32258064           | 6              | 0.01732752       |
| 3777  | GO:0005302 GO:0015508 | L-tyrosine transmembrane tr     | 0.00    | 2                  | 0.32258064           | 6              | 0.01732752       |
| 3904  | GO:0005576            | extracellular region            | 0.00    | 9                  | 1.451613             | 178            | 0.5140497        |
| 21331 | GO:0045735            | nutrient reservoir activity     | 0.01    | 6                  | 0.9677419            | 89             | 0.25702485       |
| 5705  | GO:0008152            | metabolic process               | 0.01    | 344                | 55.48387             | 17432          | 50.34222         |
| 3129  | GO:0004467            | long-chain fatty acid-CoA lig   | 0.01    | 3                  | 0.48387095           | 21             | 0.060646318      |
| 9818  | GO:0016765 GO:0016766 | transferase activity, transferr | 0.01    | 9                  | 1.451613             | 185            | 0.53426516       |
| 6884  | GO:0009607            | response to biotic stimulus     | 0.01    | 7                  | 1.1290323            | 122            | 0.3523262        |
| 8489  | GO:0015066            | alpha-amylase inhibitor activ   | 0.01    | 3                  | 0.48387095           | 22             | 0.06353424       |
| 5636  | GO:0008061            | chitin binding                  | 0.01    | 3                  | 0.48387095           | 23             | 0.06642216       |
| 3888  | GO:0005529            | sugar binding                   | 0.01    | 8                  | 1.2903225            | 158            | 0.45629135       |
| 4530  | GO:0006355 GO:0032583 | regulation of transcription, Df | 0.01    | 63                 | 10.16129             | 2591           | 7.4826           |
| 25544 | GO:0051252            | regulation of RNA metabolic     | 0.01    | 63                 | 10.16129             | 2593           | 7.488376         |
| 6248  | GO:0008843            | endochitinase activity          | 0.01    | 3                  | 0.48387095           | 24             | 0.06931008       |
| 3213  | GO:0004568            | chitinase activity              | 0.01    | 3                  | 0.48387095           | 24             | 0.06931008       |
| 7141  | GO:0009889            | regulation of biosynthetic pro  | 0.01    | 63                 | 10.16129             | 2605           | 7.523031         |
| 13756 | GO:0031326            | regulation of cellular biosynth | 0.01    | 63                 | 10.16129             | 2605           | 7.523031         |
| 32213 | GO:2000112            | regulation of cellular macrom   | 0.01    | 63                 | 10.16129             | 2605           | 7.523031         |
| 7772  | GO:0010556            | regulation of macromolecule     | 0.01    | 63                 | 10.16129             | 2605           | 7.523031         |
| 9764  | GO:0016701            | oxidoreductase activity, actin  | 0.01    | 5                  | 0.8064516            | 72             | 0.20793022       |
| 8493  | GO:0015074            | DNA integration                 | 0.01    | 4                  | 0.6451613            | 47             | 0.13573223       |
| 2864  | GO:0004058 GO:0016400 | aromatic-L-amino-acid deca      | 0.01    | 2                  | 0.32258064           | 9              | 0.025991278      |
| 25094 | GO:0050789 GO:0050791 | regulation of biological proc   | 0.01    | 97                 | 15.645162            | 4315           | 12.461374        |
| 13753 | GO:0031323            | regulation of cellular metabo   | 0.01    | 66                 | 10.645162            | 2770           | 7.999538         |
| 11221 | GO:0019219            | regulation of nucleobase, nu    | 0.01    | 64                 | 10.32258             | 2675           | 7.7251854        |
| 25468 | GO:0051171            | regulation of nitrogen compo    | 0.01    | 64                 | 10.32258             | 2675           | 7.7251854        |
| 28364 | GO:0065007            | biological regulation           | 0.01    | 98                 | 15.806452            | 4376           | 12.637537        |
| 7692  | GO:0010468            | regulation of gene expressio    | 0.01    | 63                 | 10.16129             | 2635           | 7.6096687        |
| 21148 | GO:0045547            | dehydrodichliphosphate          | 0.01    | 2                  | 0.32258064           | 10             | 0.0288792        |
| 23116 | GO:0047631            | ADP-ribose diphosphatase a      | 0.01    | 2                  | 0.32258064           | 10             | 0.0288792        |
| 9909  | GO:0016877            | ligase activity, forming carb   | 0.01    | 5                  | 0.8064516            | 78             | 0.22525774       |
| 9845  | GO:0016798            | hydrolase activity, acting on   | 0.01    | 14                 | 2.2580645            | 401            | 1.1580559        |
| 27228 | GO:0060255            | regulation of macromolecule     | 0.01    | 63                 | 10.16129             | 2660           | 7.6818666        |
| 31465 | GO:0080090            | regulation of primary metabo    | 0.01    | 64                 | 10.32258             | 2710           | 7.826263         |
| 13082 | GO:0030599            | pectinesterase activity         | 0.02    | 8                  | 1.2903225            | 178            | 0.5140497        |
| 5702  | GO:0008146            | sulfotransferase activity       | 0.02    | 4                  | 0.6451613            | 54             | 0.15594767       |
| 9871  | GO:0016831            | carboxy-lyase activity          | 0.02    | 6                  | 0.9677419            | 115            | 0.3321108        |
| 26845 | GO:0052689            | carboxylic ester hydrolase ac   | 0.02    | 17                 | 2.7419365            | 538            | 1.5537009        |
| 6424  | GO:0009055 GO:0009053 | electron carrier activity       | 0.02    | 7                  | 1.1290323            | 154            | 0.44473964       |
| 25098 | GO:0050794 GO:0051244 | regulation of cellular process  | 0.02    | 88                 | 14.193548            | 3987           | 11.514136        |
| 12806 | GO:0030247            | polysaccharide binding          | 0.02    | 3                  | 0.48387095           | 35             | 0.10107719       |
| 1169  | GO:0001871            | pattern binding                 | 0.02    | 3                  | 0.48387095           | 35             | 0.10107719       |
| 11157 | GO:0019144            | ADP-sugar diphosphatase a       | 0.03    | 2                  | 0.32258064           | 14             | 0.040430877      |
| 9870  | GO:0016830            | carbon-carbon lyase activity    | 0.03    | 7                  | 1.1290323            | 161            | 0.4649551        |
| 9765  | GO:0016702            | oxidoreductase activity, actin  | 0.03    | 4                  | 0.6451613            | 66             | 0.1906027        |
| 3382  | GO:0004768 GO:0016214 | stearyl-CoA 9-desaturase a      | 0.03    | 2                  | 0.32258064           | 16             | 0.046206716      |
| 9427  | GO:0016215            | CoA desaturase activity         | 0.03    | 2                  | 0.32258064           | 16             | 0.046206716      |
| 26959 | GO:0055114            | oxidation-reduction process     | 0.03    | 57                 | 9.193548             | 2490           | 7.1909204        |
| 5952  | GO:0008470            | isovaleryl-CoA dehydrogena      | 0.04    | 1                  | 0.16129032           | 2              | 0.00577584       |
| 6593  | GO:0009229            | thiamine diphosphate biosyn     | 0.04    | 1                  | 0.16129032           | 2              | 0.00577584       |
| 9558  | GO:0016433            | rRNA (adenine) methyltransf     | 0.04    | 1                  | 0.16129032           | 2              | 0.00577584       |
| 9595  | GO:0016485            | protein processing              | 0.04    | 1                  | 0.16129032           | 2              | 0.00577584       |
| 9638  | GO:0016539            | intron-mediated protein splic   | 0.04    | 1                  | 0.16129032           | 2              | 0.00577584       |
| 9686  | GO:0016602            | CCAAT-binding factor comp       | 0.04    | 1                  | 0.16129032           | 2              | 0.00577584       |
| 12948 | GO:0030417            | nicotianamine metabolic pro     | 0.04    | 1                  | 0.16129032           | 2              | 0.00577584       |
| 12949 | GO:0030418            | nicotianamine biosynthetic p    | 0.04    | 1                  | 0.16129032           | 2              | 0.00577584       |
| 13372 | GO:0030908            | protein splicing                | 0.04    | 1                  | 0.16129032           | 2              | 0.00577584       |
| 18706 | GO:0042367            | thiamine diphosphate metab      | 0.04    | 1                  | 0.16129032           | 2              | 0.00577584       |
| 22759 | GO:0047268            | galactinol-raffinose galactos   | 0.04    | 1                  | 0.16129032           | 2              | 0.00577584       |
| 25888 | GO:0051604            | protein maturation              | 0.04    | 1                  | 0.16129032           | 2              | 0.00577584       |
| 30709 | GO:0072350            | tricarboxylic acid metabolic p  | 0.04    | 1                  | 0.16129032           | 2              | 0.00577584       |
| 30710 | GO:0072351            | tricarboxylic acid biosynthetic | 0.04    | 1                  | 0.16129032           | 2              | 0.00577584       |
| 143   | GO:0000179 GO:0043790 | rRNA (adenine-N6,N6)-dim        | 0.04    | 1                  | 0.16129032           | 2              | 0.00577584       |
| 3148  | GO:0004489 GO:0008702 | methylene-tetrahydrofolate re   | 0.04    | 1                  | 0.16129032           | 2              | 0.00577584       |
| 18738 | GO:0042389            | omega-3 fatty acid desatura     | 0.04    | 2                  | 0.32258064           | 17             | 0.049094636      |
| 23522 | GO:0048046            | apoplast                        | 0.04    | 4                  | 0.6451613            | 70             | 0.20215438       |
| 10899 | GO:0018858            | benzoate-CoA ligase activity    | 0.04    | 2                  | 0.32258064           | 18             | 0.051982556      |
| 2674  | GO:0003824            | catalytic activity              | 0.04    | 213                | 34.35484             | 10750          | 31.045137        |
| 9832  | GO:0016782            | transferase activity, transferr | 0.04    | 4                  | 0.6451613            | 74             | 0.21370606       |
| 18750 | GO:0042401            | cellular biogenic amine biosy   | 0.04    | 2                  | 0.32258064           | 19             | 0.054870475      |
| 25510 | GO:0051213            | dioxigenase activity            | 0.05    | 4                  | 0.6451613            | 75             | 0.21659398       |
| 3124  | GO:0004462            | lactoylglutathione lyase activ  | 0.05    | 2                  | 0.32258064           | 20             | 0.0577584        |
| 9877  | GO:0016838            | carbon-oxygen lyase activity    | 0.05    | 4                  | 0.6451613            | 77             | 0.22236982       |



|       |                          |                                  |      |    |            |      |             |
|-------|--------------------------|----------------------------------|------|----|------------|------|-------------|
| 9486  | GO:0016298               | lipase activity                  | 0.05 | 7  | 1.1290323  | 185  | 0.53426516  |
| 3853  | GO:0005463               | UDP-N-acetylgalactosamine        | 0.05 | 1  | 0.16129032 | 3    | 0.00866376  |
| 9058  | GO:0015789               | UDP-N-acetylgalactosamine        | 0.05 | 1  | 0.16129032 | 3    | 0.00866376  |
| 13651 | GO:0031219               | levanase activity                | 0.05 | 1  | 0.16129032 | 3    | 0.00866376  |
| 21936 | GO:0046409               | p-coumarate 3-hydroxylase a      | 0.05 | 1  | 0.16129032 | 3    | 0.00866376  |
| 9600  | GO:0016491               | oxidoreductase activity          | 0.06 | 40 | 6.451613   | 1724 | 4.9787736   |
| 24858 | GO:0050551               | myrcene synthase activity        | 0.06 | 2  | 0.32258064 | 22   | 0.06353424  |
| 9783  | GO:0016722               | oxidoreductase activity, oxid    | 0.06 | 3  | 0.48387095 | 50   | 0.14439599  |
| 12794 | GO:0030234               | enzyme regulator activity        | 0.06 | 12 | 1.9354838  | 403  | 1.1638317   |
| 9779  | GO:0016717               | oxidoreductase activity, actin   | 0.07 | 2  | 0.32258064 | 24   | 0.06931008  |
| 13657 | GO:0031225               | anchored to membrane             | 0.07 | 2  | 0.32258064 | 24   | 0.06931008  |
| 25578 | GO:0051287 GO:0051288    | NAD binding                      | 0.07 | 2  | 0.32258064 | 24   | 0.06931008  |
| 3399  | GO:0004788               | thiamine diphosphokinase ac      | 0.07 | 1  | 0.16129032 | 4    | 0.011551679 |
| 3834  | GO:0005395               | eye pigment precursor trans      | 0.07 | 1  | 0.16129032 | 4    | 0.011551679 |
| 5826  | GO:0008307               | structural constituent of musc   | 0.07 | 1  | 0.16129032 | 4    | 0.011551679 |
| 5896  | GO:0008401               | retinoic acid 4-hydroxylase a    | 0.07 | 1  | 0.16129032 | 4    | 0.011551679 |
| 5934  | GO:0008446               | GDP-mannose 4,6-dehydrat         | 0.07 | 1  | 0.16129032 | 4    | 0.011551679 |
| 6293  | GO:0008898               | homocysteine S-methyltrans       | 0.07 | 1  | 0.16129032 | 4    | 0.011551679 |
| 7511  | GO:0010285 GO:0043742    | L,L-diaminopimelate aminotr      | 0.07 | 1  | 0.16129032 | 4    | 0.011551679 |
| 8130  | GO:0010921               | regulation of phosphatase ac     | 0.07 | 1  | 0.16129032 | 4    | 0.011551679 |
| 8598  | GO:0015188               | L-isoleucine transmembran        | 0.07 | 1  | 0.16129032 | 4    | 0.011551679 |
| 8877  | GO:0015578 GO:0015589    | mannose transmembrane tra        | 0.07 | 1  | 0.16129032 | 4    | 0.011551679 |
| 9030  | GO:0015761               | mannose transport                | 0.07 | 1  | 0.16129032 | 4    | 0.011551679 |
| 9072  | GO:0015803               | branched-chain aliphatic am      | 0.07 | 1  | 0.16129032 | 4    | 0.011551679 |
| 9086  | GO:0015818               | isoleucine transport             | 0.07 | 1  | 0.16129032 | 4    | 0.011551679 |
| 16391 | GO:0034007               | S-linalool synthase activity     | 0.07 | 1  | 0.16129032 | 4    | 0.011551679 |
| 17669 | GO:0035303               | regulation of dephosphorylat     | 0.07 | 1  | 0.16129032 | 4    | 0.011551679 |
| 19932 | GO:0043666               | regulation of phosphoprotein     | 0.07 | 1  | 0.16129032 | 4    | 0.011551679 |
| 24433 | GO:0050113               | inositol oxygenase activity      | 0.07 | 1  | 0.16129032 | 4    | 0.011551679 |
| 2689  | GO:0003839               | gamma-glutamylcyclotransfe       | 0.07 | 1  | 0.16129032 | 4    | 0.011551679 |
| 2753  | GO:0003919               | FMN adenyltransferase ac         | 0.07 | 1  | 0.16129032 | 4    | 0.011551679 |
| 3291  | GO:0004657               | proline dehydrogenase activ      | 0.07 | 1  | 0.16129032 | 4    | 0.011551679 |
| 9482  | GO:0016291 GO:0008778 GO | acyl-CoA thioesterase activi     | 0.07 | 2  | 0.32258064 | 25   | 0.072197996 |
| 17147 | GO:0034768               | (E)-beta-ocimene synthase a      | 0.08 | 2  | 0.32258064 | 26   | 0.075085916 |
| 7557  | GO:0010333               | terpene synthase activity        | 0.08 | 3  | 0.48387095 | 57   | 0.16461143  |
| 18956 | GO:0042626               | ATPase activity, coupled to t    | 0.09 | 7  | 1.1290323  | 211  | 0.6093511   |
| 22765 | GO:0047274               | galactinol-sucrose galactosyl    | 0.09 | 1  | 0.16129032 | 5    | 0.0144396   |
| 3035  | GO:0004351               | glutamate decarboxylase ac       | 0.09 | 1  | 0.16129032 | 5    | 0.0144396   |
| 9861  | GO:0016820               | hydrolase activity, acting on    | 0.09 | 7  | 1.1290323  | 212  | 0.612239    |
| 30700 | GO:0072341               | modified amino acid binding      | 0.09 | 3  | 0.48387095 | 59   | 0.17038727  |
| 14811 | GO:0032403               | protein complex binding          | 0.09 | 3  | 0.48387095 | 60   | 0.17327519  |
| 25095 | GO:0050790               | regulation of catalytic activity | 0.09 | 13 | 2.096774   | 480  | 1.3862015   |
| 28366 | GO:0065009               | regulation of molecular funct    | 0.10 | 13 | 2.096774   | 484  | 1.3977532   |
| 6216  | GO:0008810               | cellulase activity               | 0.10 | 2  | 0.32258064 | 30   | 0.086637594 |
| 9785  | GO:0016724               | oxidoreductase activity, oxid    | 0.10 | 2  | 0.32258064 | 30   | 0.086637594 |
| 2870  | GO:0004064               | arylesterase activity            | 0.10 | 2  | 0.32258064 | 30   | 0.086637594 |
| 3009  | GO:0004322               | ferroxidase activity             | 0.10 | 2  | 0.32258064 | 30   | 0.086637594 |
| 4953  | GO:0006868 GO:0015815    | glutamine transport              | 0.10 | 1  | 0.16129032 | 6    | 0.01732752  |
| 6000  | GO:0008531               | riboflavin kinase activity       | 0.10 | 1  | 0.16129032 | 6    | 0.01732752  |
| 6317  | GO:0008923               | lysine decarboxylase activity    | 0.10 | 1  | 0.16129032 | 6    | 0.01732752  |
| 8505  | GO:0015089               | high affinity copper ion trans   | 0.10 | 1  | 0.16129032 | 6    | 0.01732752  |
| 8596  | GO:0015186               | L-glutamine transmembran         | 0.10 | 1  | 0.16129032 | 6    | 0.01732752  |
| 11899 | GO:0019992               | diacylglycerol binding           | 0.10 | 1  | 0.16129032 | 6    | 0.01732752  |
| 19761 | GO:0043495               | protein anchor                   | 0.10 | 1  | 0.16129032 | 6    | 0.01732752  |
| 31395 | GO:0080018               | anthocyanin 5-O-glucosyltra      | 0.10 | 1  | 0.16129032 | 6    | 0.01732752  |
| 5     | GO:0000007               | low-affinity zinc ion transme    | 0.10 | 1  | 0.16129032 | 6    | 0.01732752  |
| 2713  | GO:0003863               | 3-methyl-2-oxobutanoate de       | 0.10 | 1  | 0.16129032 | 6    | 0.01732752  |
| 2811  | GO:0003995 GO:0019109    | acyl-CoA dehydrogenase ac        | 0.10 | 1  | 0.16129032 | 6    | 0.01732752  |
| 19590 | GO:0043295               | glutathione binding              | 0.11 | 2  | 0.32258064 | 31   | 0.08952551  |
| 3717  | GO:0005199               | structural constituent of cell v | 0.11 | 2  | 0.32258064 | 32   | 0.09241343  |
| 6942  | GO:0009674               | potassium:sodium symporte        | 0.11 | 2  | 0.32258064 | 32   | 0.09241343  |
| 12522 | GO:0022820               | potassium ion symporter act      | 0.11 | 2  | 0.32258064 | 32   | 0.09241343  |
| 4705  | GO:0006576               | cellular biogenic amine met      | 0.12 | 2  | 0.32258064 | 33   | 0.09530135  |
| 9812  | GO:0016758               | transferase activity, transferr  | 0.12 | 13 | 2.096774   | 501  | 1.4468478   |
| 3443  | GO:0004834               | tryptophan synthase activity     | 0.12 | 1  | 0.16129032 | 7    | 0.020215439 |
| 21776 | GO:0046219               | indolalkylamine biosynthetic     | 0.12 | 1  | 0.16129032 | 7    | 0.020215439 |
| 128   | GO:0000162 GO:0009096    | tryptophan biosynthetic proc     | 0.12 | 1  | 0.16129032 | 7    | 0.020215439 |
| 2945  | GO:0004143               | diacylglycerol kinase activity   | 0.12 | 1  | 0.16129032 | 7    | 0.020215439 |
| 3255  | GO:0004615 GO:0008971    | phosphomannomutase activ         | 0.12 | 1  | 0.16129032 | 7    | 0.020215439 |
| 11931 | GO:0020037               | heme binding                     | 0.12 | 14 | 2.2580645  | 550  | 1.5883559   |
| 3873  | GO:0005507               | copper ion binding               | 0.12 | 5  | 0.8064516  | 146  | 0.42163628  |
| 22375 | GO:0046872               | metal ion binding                | 0.12 | 62 | 10         | 2985 | 8.6204405   |
| 4320  | GO:0006082               | organic acid metabolic proc      | 0.13 | 10 | 1.6129032  | 369  | 1.0656425   |
| 11716 | GO:0019752               | carboxylic acid metabolic pro    | 0.13 | 10 | 1.6129032  | 369  | 1.0656425   |
| 19707 | GO:0043436               | oxoacid metabolic process        | 0.13 | 10 | 1.6129032  | 369  | 1.0656425   |
| 9480  | GO:0016289               | CoA hydrolase activity           | 0.13 | 2  | 0.32258064 | 35   | 0.10107719  |
| 24968 | GO:0050662               | coenzyme binding                 | 0.13 | 6  | 0.9677419  | 191  | 0.5515927   |
| 19470 | GO:0043167               | ion binding                      | 0.13 | 62 | 10         | 2997 | 8.655096    |
| 19472 | GO:0043169               | cation binding                   | 0.13 | 62 | 10         | 2997 | 8.655096    |
| 19758 | GO:0043492               | ATPase activity, coupled to r    | 0.13 | 7  | 1.1290323  | 235  | 0.67866117  |
| 3402  | GO:0004791               | thioredoxin-disulfide reducta    | 0.13 | 1  | 0.16129032 | 8    | 0.023103358 |
| 6378  | GO:0008999               | ribosomal-protein-alanine N-     | 0.13 | 1  | 0.16129032 | 8    | 0.023103358 |
| 4     | GO:0000006               | high affinity zinc uptake trans  | 0.13 | 1  | 0.16129032 | 8    | 0.023103358 |
| 3872  | GO:0005506               | iron ion binding                 | 0.14 | 14 | 2.2580645  | 563  | 1.6258988   |
| 18541 | GO:0042180               | cellular ketone metabolic pro    | 0.14 | 10 | 1.6129032  | 375  | 1.0829699   |
| 9767  | GO:0016705               | oxidoreductase activity, actin   | 0.14 | 9  | 1.451613   | 329  | 0.95012563  |
| 3306  | GO:0004674 GO:0004695 GO | protein serine/threonine kin     | 0.15 | 24 | 3.8709676  | 1062 | 3.0669708   |
| 3694  | GO:0005160               | transforming growth factor b     | 0.15 | 1  | 0.16129032 | 9    | 0.025991278 |
| 4697  | GO:0006568               | tryptophan metabolic proces      | 0.15 | 1  | 0.16129032 | 9    | 0.025991278 |
| 4715  | GO:0006586               | indolalkylamine metabolic pro    | 0.15 | 1  | 0.16129032 | 9    | 0.025991278 |
| 7506  | GO:0010279               | indole-3-acetic acid amido sy    | 0.15 | 1  | 0.16129032 | 9    | 0.025991278 |
| 13224 | GO:0030755               | quercetin 3-O-methyltransfer     | 0.15 | 1  | 0.16129032 | 9    | 0.025991278 |
| 19254 | GO:0042937               | tripeptide transporter activity  | 0.15 | 1  | 0.16129032 | 9    | 0.025991278 |
| 19342 | GO:0043027               | caspace inhibitor activity       | 0.15 | 1  | 0.16129032 | 9    | 0.025991278 |
| 19343 | GO:0043028               | caspace regulator activity       | 0.15 | 1  | 0.16129032 | 9    | 0.025991278 |
| 19458 | GO:0043154 GO:0001719    | negative regulation of caspa     | 0.15 | 1  | 0.16129032 | 9    | 0.025991278 |
| 19579 | GO:0043281 GO:0043026    | regulation of caspace activi     | 0.15 | 1  | 0.16129032 | 9    | 0.025991278 |
| 9874  | GO:0016835               | carbon-oxygen lyase activity     | 0.16 | 6  | 0.9677419  | 202  | 0.5833598   |
| 5891  | GO:0008395 GO:0008394    | steroid hydroxylase activity     | 0.16 | 2  | 0.32258064 | 40   | 0.1155168   |
| 24966 | GO:0050660               | flavin adenine dinucleotide b    | 0.16 | 4  | 6.451613   | 118  | 0.34077454  |
| 5716  | GO:0008172               | S-methyltransferase activity     | 0.17 | 1  | 0.16129032 | 10   | 0.0288792   |
| 7175  | GO:0009924               | octadecanal decarboxylase        | 0.17 | 1  | 0.16129032 | 10   | 0.0288792   |
| 9741  | GO:0016688 GO:0016654    | oxidoreductase activity, actin   | 0.17 | 1  | 0.16129032 | 10   | 0.0288792   |
| 9828  | GO:0016778               | diphosphotransferase activity    | 0.17 | 1  | 0.16129032 | 10   | 0.0288792   |
| 15183 | GO:0032781               | positive regulation of ATPase    | 0.17 | 1  | 0.16129032 | 10   | 0.0288792   |
| 19728 | GO:0043462               | regulation of ATPase activity    | 0.17 | 1  | 0.16129032 | 10   | 0.0288792   |
| 27563 | GO:0060590               | ATPase regulator activity        | 0.17 | 1  | 0.16129032 | 10   | 0.0288792   |
| 30135 | GO:0071771               | aldehyde decarboxylase acti      | 0.17 | 1  | 0.16129032 | 10   | 0.0288792   |
| 989   | GO:0001671               | ATPase activator activity        | 0.17 | 1  | 0.16129032 | 10   | 0.0288792   |
| 2797  | GO:0003979               | UDP-glucose 6-dehydrogen         | 0.17 | 1  | 0.16129032 | 10   | 0.0288792   |
| 4954  | GO:0006869               | lipid transport                  | 0.17 | 6  | 0.9677419  | 208  | 0.6006873   |
| 8085  | GO:0010876               | lipid localization               | 0.17 | 6  | 0.9677419  | 208  | 0.6006873   |
| 9682  | GO:0016597               | amino acid binding               | 0.17 | 3  | 0.48387095 | 80   | 0.2310336   |
| 19479 | GO:0043176               | amine binding                    | 0.17 | 3  | 0.48387095 | 80   | 0.2310336   |
| 13884 | GO:0031461               | cullin-RING ubiquitin liqase c   | 0.17 | 2  | 0.32258064 | 42   | 0.121292636 |
| 9795  | GO:0016740               | transferase activity             | 0.18 | 75 | 12.096774  | 3764 | 10.870131   |
| 3260  | GO:0004620               | phospholipase activity           | 0.18 | 4  | 6.451613   | 123  | 0.35521415  |
| 8589  | GO:0015179               | L-amino acid transmembran        | 0.18 | 2  | 0.32258064 | 43   | 0.124180555 |
| 9076  | GO:0015807               | L-amino acid transport           | 0.18 | 2  | 0.32258064 | 43   | 0.124180555 |
| 16183 | GO:0033799               | myricetin 3'-O-methyltransfe     | 0.18 | 1  | 0.16129032 | 11   | 0.03176712  |
| 18781 | GO:0042435               | indole-containing compound       | 0.18 | 1  | 0.16129032 | 11   | 0.03176712  |

|       |                          |                                 |      |    |            |      |             |
|-------|--------------------------|---------------------------------|------|----|------------|------|-------------|
| 19256 | GO:0042939               | tripeptide transport            | 0.18 | 1  | 0.16129032 | 11   | 0.03176712  |
| 22376 | GO:0046873               | metal ion transmembrane tra     | 0.18 | 6  | 0.9677419  | 213  | 0.6151269   |
| 22409 | GO:0046906               | tetrapyrrole binding            | 0.19 | 14 | 2.2580645  | 596  | 1.7212002   |
| 8749  | GO:0015399               | primary active transmembran     | 0.19 | 7  | 1.1290323  | 260  | 0.75085914  |
| 8753  | GO:0015405               | P-P-bond-hydrolysis-driven t    | 0.19 | 7  | 1.1290323  | 260  | 0.75085914  |
| 4912  | GO:0006813 GO:0015458    | potassium ion transport         | 0.19 | 3  | 0.48387095 | 84   | 0.24258527  |
| 30168 | GO:0071804               | cellular potassium ion transp   | 0.19 | 3  | 0.48387095 | 84   | 0.24258527  |
| 30169 | GO:0071805               | potassium ion transmembran      | 0.19 | 3  | 0.48387095 | 84   | 0.24258527  |
| 3386  | GO:0004773               | sterol-sulfatase activity       | 0.19 | 1  | 0.16129032 | 12   | 0.03465504  |
| 4506  | GO:0006313 GO:0006317    | transposition, DNA-mediated     | 0.19 | 1  | 0.16129032 | 12   | 0.03465504  |
| 5965  | GO:0008484               | sulfuric ester hydrolase activ  | 0.19 | 1  | 0.16129032 | 12   | 0.03465504  |
| 9775  | GO:0016713               | oxidoreductase activity, acti   | 0.19 | 1  | 0.16129032 | 12   | 0.03465504  |
| 10743 | GO:0018685 GO:0008393    | alkane 1-monoxygenase ac        | 0.19 | 1  | 0.16129032 | 12   | 0.03465504  |
| 14604 | GO:0032196               | transposition                   | 0.19 | 1  | 0.16129032 | 12   | 0.03465504  |
| 19047 | GO:0042723               | thiamine-containing compou      | 0.19 | 1  | 0.16129032 | 12   | 0.03465504  |
| 19048 | GO:0042724               | thiamine-containing compou      | 0.19 | 1  | 0.16129032 | 12   | 0.03465504  |
| 31380 | GO:0080002               | UDP-glucose:4-aminobenzo        | 0.19 | 1  | 0.16129032 | 12   | 0.03465504  |
| 3156  | GO:0004497               | monoxygenase activity           | 0.20 | 5  | 0.8064516  | 172  | 0.49672222  |
| 3200  | GO:0004553 GO:0016800    | hydrolase activity, hydrolyzi   | 0.20 | 8  | 1.2903225  | 312  | 0.90103096  |
| 30204 | GO:0071840               | cellular component organiza     | 0.20 | 9  | 1.451613   | 362  | 1.045247    |
| 8497  | GO:0015079 GO:0022817    | potassium ion transmembran      | 0.21 | 2  | 0.32258064 | 47   | 0.13573223  |
| 119   | GO:0000151               | ubiquitin ligase complex        | 0.21 | 3  | 0.48387095 | 88   | 0.25413695  |
| 7551  | GO:0010327               | acetyl CoA:(Z)-3-hexen-1-ol     | 0.21 | 1  | 0.16129032 | 13   | 0.037542958 |
| 8149  | GO:0010941               | regulation of cell death        | 0.21 | 1  | 0.16129032 | 13   | 0.037542958 |
| 8578  | GO:0015165               | pyrimidine nucleotide-sugar t   | 0.21 | 1  | 0.16129032 | 13   | 0.037542958 |
| 9050  | GO:0015781               | pyrimidine nucleotide-sugar t   | 0.21 | 1  | 0.16129032 | 13   | 0.037542958 |
| 18777 | GO:0042430 GO:0042434    | indole-containing compound      | 0.21 | 1  | 0.16129032 | 13   | 0.037542958 |
| 19298 | GO:0042981               | regulation of apoptosis         | 0.21 | 1  | 0.16129032 | 13   | 0.037542958 |
| 19381 | GO:0043067 GO:0043070    | regulation of programmed ce     | 0.21 | 1  | 0.16129032 | 13   | 0.037542958 |
| 28930 | GO:0070566               | adenylyltransferase activity    | 0.21 | 2  | 0.32258064 | 48   | 0.13862015  |
| 9725  | GO:0016645               | oxidoreductase activity, acti   | 0.22 | 49 | 0.32258064 | 49   | 0.14150807  |
| 6075  | GO:0008649               | rRNA methyltransferase acti     | 0.22 | 1  | 0.16129032 | 14   | 0.040430877 |
| 31408 | GO:0080031               | methyl salicylate esterase ac   | 0.22 | 1  | 0.16129032 | 14   | 0.040430877 |
| 12608 | GO:0030001               | metal ion transport             | 0.23 | 9  | 1.451613   | 374  | 1.080082    |
| 9975  | GO:0016998               | cell wall macromolecule cata    | 0.23 | 2  | 0.32258064 | 51   | 0.14728391  |
| 3293  | GO:0004659               | prenyltransferase activity      | 0.23 | 2  | 0.32258064 | 51   | 0.14728391  |
| 23515 | GO:0048037               | cofactor binding                | 0.23 | 8  | 1.2903225  | 327  | 0.94434977  |
| 7520  | GO:0010294               | abscisic acid glucosyltransfe   | 0.24 | 1  | 0.16129032 | 15   | 0.043318797 |
| 11733 | GO:0019773               | proteasome core complex, a      | 0.24 | 1  | 0.16129032 | 15   | 0.043318797 |
| 2868  | GO:0004062               | aryl sulfotransferase activity  | 0.24 | 1  | 0.16129032 | 15   | 0.043318797 |
| 3209  | GO:0004564               | beta-fructofuranosylase activ   | 0.24 | 1  | 0.16129032 | 15   | 0.043318797 |
| 20287 | GO:0044036               | cell wall macromolecule met     | 0.24 | 2  | 0.32258064 | 52   | 0.15017183  |
| 30066 | GO:0071702               | organic substance transport     | 0.24 | 12 | 1.9354838  | 529  | 1.5277096   |
| 3742  | GO:0005242               | inward rectifier potassium ch   | 0.25 | 1  | 0.16129032 | 16   | 0.046206716 |
| 13624 | GO:0031167               | rRNA methylation                | 0.25 | 1  | 0.16129032 | 16   | 0.046206716 |
| 31396 | GO:0080019               | fatty-acyl-CoA reductase (alk   | 0.25 | 1  | 0.16129032 | 16   | 0.046206716 |
| 30205 | GO:0071841               | cellular component organiza     | 0.25 | 7  | 1.1290323  | 285  | 0.8230572   |
| 13829 | GO:0031406               | carboxylic acid binding         | 0.26 | 3  | 0.48387095 | 98   | 0.28301615  |
| 2986  | GO:0004252               | serine-type endopeptidase a     | 0.26 | 4  | 0.6451613  | 144  | 0.41586044  |
| 9533  | GO:0016405               | CoA-ligase activity             | 0.26 | 2  | 0.32258064 | 55   | 0.15883559  |
| 11776 | GO:0019825               | oxygen binding                  | 0.26 | 9  | 1.451613   | 389  | 1.1234008   |
| 30887 | GO:0072531               | pyrimidine-containing compo     | 0.26 | 1  | 0.16129032 | 17   | 0.049094636 |
| 31498 | GO:0080123               | thiamine-adenosine synthetase   | 0.26 | 1  | 0.16129032 | 17   | 0.049094636 |
| 9883  | GO:0016846               | carbon-sulfur lyase activity    | 0.27 | 2  | 0.32258064 | 56   | 0.16172351  |
| 9910  | GO:0016878               | acid-thiol lyase activity       | 0.27 | 2  | 0.32258064 | 57   | 0.16461143  |
| 9906  | GO:0016874               | lyase activity                  | 0.28 | 13 | 2.096774   | 597  | 1.7240882   |
| 3832  | GO:0005388               | calcium-transporting ATPase     | 0.28 | 1  | 0.16129032 | 18   | 0.051982556 |
| 5776  | GO:0008252               | nucleotidase activity           | 0.28 | 1  | 0.16129032 | 18   | 0.051982556 |
| 9726  | GO:0016646               | oxidoreductase activity, acti   | 0.28 | 1  | 0.16129032 | 18   | 0.051982556 |
| 12887 | GO:0030332               | cyclin binding                  | 0.28 | 1  | 0.16129032 | 18   | 0.051982556 |
| 16595 | GO:0034212               | peptide N-acetyltransferase     | 0.28 | 1  | 0.16129032 | 18   | 0.051982556 |
| 28368 | GO:0070001               | aspartic-type peptidase activ   | 0.28 | 1  | 0.16129032 | 18   | 0.051982556 |
| 2981  | GO:0004190               | aspartic-type endopeptidase     | 0.28 | 1  | 0.16129032 | 18   | 0.051982556 |
| 3239  | GO:0004596               | peptide alpha-N-acetyltransf    | 0.28 | 1  | 0.16129032 | 18   | 0.051982556 |
| 8558  | GO:0015145               | monosaccharide transmembr       | 0.28 | 2  | 0.32258064 | 58   | 0.16749935  |
| 9018  | GO:0015749               | monosaccharide transport        | 0.28 | 2  | 0.32258064 | 58   | 0.16749935  |
| 9800  | GO:0016746               | transferase activity, transferr | 0.28 | 11 | 1.7741935  | 498  | 1.438184    |
| 3304  | GO:0004672 GO:0050222    | protein kinase activity         | 0.28 | 27 | 4.354839   | 1333 | 3.8495972   |
| 19253 | GO:0042936               | dipeptide transporter activity  | 0.29 | 3  | 0.48387095 | 105  | 0.3032316   |
| 19255 | GO:0042938               | dipeptide transport             | 0.29 | 3  | 0.48387095 | 105  | 0.3032316   |
| 3799  | GO:0005338 GO:0005339    | nucleotide-sugar transmembr     | 0.29 | 1  | 0.16129032 | 19   | 0.054870475 |
| 9049  | GO:0015780               | nucleotide-sugar transport      | 0.29 | 1  | 0.16129032 | 19   | 0.054870475 |
| 9809  | GO:0016755               | transferase activity, transferr | 0.29 | 1  | 0.16129032 | 19   | 0.054870475 |
| 11202 | GO:0019199               | transmembrane receptor pro      | 0.29 | 11 | 1.7741935  | 504  | 1.4555116   |
| 8526  | GO:0015112               | nitrate transmembrane trans     | 0.30 | 2  | 0.32258064 | 61   | 0.1761631   |
| 8975  | GO:0015706 GO:0006872    | nitrate transport               | 0.30 | 2  | 0.32258064 | 61   | 0.1761631   |
| 9801  | GO:0016747               | transferase activity, transferr | 0.30 | 10 | 1.6129032  | 456  | 1.3168914   |
| 3798  | GO:0005337               | nucleoside transmembrane t      | 0.30 | 1  | 0.16129032 | 20   | 0.0577584   |
| 6201  | GO:0008794               | arsenate reductase (glutared    | 0.30 | 1  | 0.16129032 | 20   | 0.0577584   |
| 9122  | GO:0015858               | nucleoside transport            | 0.30 | 1  | 0.16129032 | 20   | 0.0577584   |
| 9707  | GO:0016624               | oxidoreductase activity, acti   | 0.30 | 1  | 0.16129032 | 20   | 0.0577584   |
| 9784  | GO:0016723               | oxidoreductase activity, oxid   | 0.30 | 1  | 0.16129032 | 20   | 0.0577584   |
| 13086 | GO:0030611               | arsenate reductase activity     | 0.30 | 1  | 0.16129032 | 20   | 0.0577584   |
| 13088 | GO:0030613               | oxidoreductase activity, acti   | 0.30 | 1  | 0.16129032 | 20   | 0.0577584   |
| 13089 | GO:0030614               | oxidoreductase activity, acti   | 0.30 | 1  | 0.16129032 | 20   | 0.0577584   |
| 122   | GO:0000154 GO:0016548    | rRNA modification               | 0.30 | 1  | 0.16129032 | 20   | 0.0577584   |
| 225   | GO:0000293               | ferric-chelate reductase activ  | 0.30 | 1  | 0.16129032 | 20   | 0.0577584   |
| 6018  | GO:0008559 GO:0005226 GO | xenobiotic-transporting ATPa    | 0.31 | 2  | 0.32258064 | 62   | 0.17905103  |
| 19225 | GO:0042908               | xenobiotic transport            | 0.31 | 2  | 0.32258064 | 62   | 0.17905103  |
| 19227 | GO:0042910               | xenobiotic transporter activity | 0.31 | 2  | 0.32258064 | 62   | 0.17905103  |
| 3474  | GO:0004869 GO:0004870    | cysteine-type endopeptidase     | 0.32 | 1  | 0.16129032 | 21   | 0.060646318 |
| 5878  | GO:0008378               | galactosyltransferase activity  | 0.32 | 1  | 0.16129032 | 21   | 0.060646318 |
| 9902  | GO:0016868 GO:0016777    | intramolecular transferase ac   | 0.32 | 1  | 0.16129032 | 21   | 0.060646318 |
| 23518 | GO:0048040               | UDP-glucuronate decarboxy       | 0.32 | 1  | 0.16129032 | 21   | 0.060646318 |
| 22416 | GO:0046915               | transition metal ion transmem   | 0.32 | 2  | 0.32258064 | 64   | 0.18482687  |
| 9838  | GO:0016790               | thioester hydrolase activity    | 0.32 | 2  | 0.32258064 | 65   | 0.18771479  |
| 9285  | GO:0016043               | cellular component organiza     | 0.33 | 6  | 0.9677419  | 261  | 0.7537471   |
| 3490  | GO:0004888 GO:0004926    | transmembrane receptor act      | 0.33 | 12 | 1.9354838  | 571  | 1.6490022   |
| 3828  | GO:0005375 GO:0005378 GO | copper ion transmembrane t      | 0.33 | 1  | 0.16129032 | 22   | 0.06353424  |
| 3831  | GO:0005385               | zinc ion transmembrane tran     | 0.33 | 1  | 0.16129032 | 22   | 0.06353424  |
| 4920  | GO:0006825               | copper ion transport            | 0.33 | 1  | 0.16129032 | 22   | 0.06353424  |
| 4924  | GO:0006829               | zinc ion transport              | 0.33 | 1  | 0.16129032 | 22   | 0.06353424  |
| 10032 | GO:0017075               | syntaxin-1 binding              | 0.33 | 1  | 0.16129032 | 22   | 0.06353424  |
| 13038 | GO:0030551               | cyclic nucleotide binding       | 0.33 | 1  | 0.16129032 | 22   | 0.06353424  |
| 17800 | GO:0035434               | copper ion transmembrane t      | 0.33 | 1  | 0.16129032 | 22   | 0.06353424  |
| 29941 | GO:0071577               | zinc ion transmembrane tran     | 0.33 | 1  | 0.16129032 | 22   | 0.06353424  |
| 9811  | GO:0016757 GO:0016932    | transferase activity, transferr | 0.33 | 15 | 2.419355   | 729  | 2.1052935   |
| 11829 | GO:0019900               | kinase binding                  | 0.33 | 2  | 0.32258064 | 66   | 0.1906027   |
| 9837  | GO:0016788               | hydrolase activity, acting on   | 0.34 | 30 | 4.83871    | 1534 | 4.430069    |
| 3662  | GO:0005126               | cytokine receptor binding       | 0.34 | 1  | 0.16129032 | 23   | 0.06642216  |
| 22753 | GO:0047262 GO:0050375    | polygalacturonate 4-alpha-ga    | 0.34 | 1  | 0.16129032 | 23   | 0.06642216  |
| 2633  | GO:0003684               | damaged DNA binding             | 0.34 | 2  | 0.16129032 | 23   | 0.06642216  |
| 32    | GO:0000041               | transition metal ion transport  | 0.34 | 2  | 0.32258064 | 68   | 0.19637854  |
| 9836  | GO:0016787               | hydrolase activity              | 0.35 | 70 | 11.290322  | 3723 | 10.751725   |
| 8559  | GO:0015146               | pentose transmembrane tran      | 0.35 | 1  | 0.16129032 | 24   | 0.06931008  |
| 8561  | GO:0015148               | D-xylose transmembrane tra      | 0.35 | 1  | 0.16129032 | 24   | 0.06931008  |
| 8829  | GO:0015519               | D-xylose:hydrogen symporte      | 0.35 | 1  | 0.16129032 | 24   | 0.06931008  |
| 9019  | GO:0015750               | pentose transport               | 0.35 | 1  | 0.16129032 | 24   | 0.06931008  |
| 9022  | GO:0015753               | D-xylose transport              | 0.35 | 1  | 0.16129032 | 24   | 0.06931008  |
| 31407 | GO:0080030               | methyl indole-3-acetate este    | 0.35 | 1  | 0.16129032 | 24   | 0.06931008  |
| 3262  | GO:0004622 GO:0045126    | lysophospholipase activity      | 0.35 | 1  | 0.16129032 | 24   | 0.06931008  |
| 17617 | GO:0035251               | UDP-glucosyltransferase act     | 0.35 | 5  | 0.8064516  | 218  | 0.62956655  |



|       |                       |                                                           |      |    |            |      |             |
|-------|-----------------------|-----------------------------------------------------------|------|----|------------|------|-------------|
| 9824  | GO:016773             | phosphotransferase activity                               | 0.35 | 29 | 4.677419   | 1493 | 4.311664    |
| 8584  | GO:0015171 GO:0015359 | amino acid transmembrane transport                        | 0.35 | 3  | 0.48387095 | 118  | 0.34077454  |
| 2521  | GO:0003333            | amino acid transmembrane transport                        | 0.35 | 3  | 0.48387095 | 118  | 0.34077454  |
| 22049 | GO:0046527            | glucosyltransferase activity                              | 0.35 | 6  | 0.9677419  | 270  | 0.77973837  |
| 10103 | GO:0017171            | serine hydrolase activity                                 | 0.36 | 5  | 0.8064516  | 220  | 0.63534236  |
| 4503  | GO:0006310            | DNA recombination                                         | 0.36 | 1  | 0.16129032 | 25   | 0.072197996 |
| 21145 | GO:0045543            | gibberellin 2-beta-dioxygenase activity                   | 0.36 | 1  | 0.16129032 | 25   | 0.072197996 |
| 31393 | GO:0080016            | (-)-E-beta-caryophyllene synthase activity                | 0.36 | 1  | 0.16129032 | 25   | 0.072197996 |
| 31394 | GO:0080017            | alpha-humulene synthase activity                          | 0.36 | 1  | 0.16129032 | 25   | 0.072197996 |
| 31493 | GO:0080118            | brassinosteroid sulfotransferase activity                 | 0.36 | 1  | 0.16129032 | 25   | 0.072197996 |
| 8675  | GO:0015293            | symporter activity                                        | 0.37 | 4  | 0.6451613  | 173  | 0.49961013  |
| 9421  | GO:0016208            | AMP binding                                               | 0.37 | 1  | 0.16129032 | 26   | 0.075085916 |
| 9897  | GO:0016862            | intramolecular oxidoreductase activity                    | 0.37 | 1  | 0.16129032 | 26   | 0.075085916 |
| 9899  | GO:0016864            | intramolecular oxidoreductase activity                    | 0.37 | 1  | 0.16129032 | 26   | 0.075085916 |
| 25135 | GO:0050832 GO:0042831 | defense response to fungus                                | 0.37 | 1  | 0.16129032 | 26   | 0.075085916 |
| 2665  | GO:0003756            | protein disulfide isomerase activity                      | 0.37 | 1  | 0.16129032 | 26   | 0.075085916 |
| 3210  | GO:0004565            | beta-galactosidase activity                               | 0.37 | 1  | 0.16129032 | 26   | 0.075085916 |
| 4951  | GO:0006865 GO:0006866 | amino acid transport                                      | 0.38 | 3  | 0.48387095 | 123  | 0.35521415  |
| 12572 | GO:0022890 GO:0015082 | inorganic cation transmembrane transport                  | 0.38 | 7  | 1.1290323  | 332  | 0.9587894   |
| 9541  | GO:0016413            | O-acetyltransferase activity                              | 0.39 | 1  | 0.16129032 | 27   | 0.077973835 |
| 3761  | GO:0005275 GO:0005279 | amine transmembrane transport                             | 0.39 | 3  | 0.48387095 | 126  | 0.3638779   |
| 3332  | GO:0004711            | ribosomal protein S6 kinase activity                      | 0.40 | 1  | 0.16129032 | 28   | 0.080861755 |
| 6940  | GO:0009672            | auxin:hydrogen symporter activity                         | 0.40 | 1  | 0.16129032 | 28   | 0.080861755 |
| 13634 | GO:0031177            | phosphopantetheine binding                                | 0.40 | 1  | 0.16129032 | 28   | 0.080861755 |
| 3284  | GO:0004650            | polygalacturonase activity                                | 0.40 | 1  | 0.16129032 | 28   | 0.080861755 |
| 9913  | GO:0016881            | acid-amino acid ligase activity                           | 0.40 | 8  | 1.2903225  | 391  | 1.1291766   |
| 6166  | GO:0008757            | S-adenosylmethionine-dependent methyltransferase activity | 0.40 | 4  | 0.6451613  | 180  | 0.5198256   |
| 7558  | GO:0010334            | sesquiterpene synthase activity                           | 0.41 | 1  | 0.16129032 | 29   | 0.083749674 |
| 11834 | GO:0019905            | synaptotagmin binding                                     | 0.41 | 1  | 0.16129032 | 29   | 0.083749674 |
| 20887 | GO:0045263            | proton-transporting ATP synthase activity                 | 0.41 | 1  | 0.16129032 | 29   | 0.083749674 |
| 30865 | GO:0072509            | divalent inorganic cation transport                       | 0.41 | 2  | 0.32258064 | 78   | 0.22525774  |
| 3975  | GO:0005667            | transcription factor complex                              | 0.42 | 1  | 0.16129032 | 30   | 0.086637594 |
| 2774  | GO:0003950            | NAD+ ADP-ribosyltransferase activity                      | 0.42 | 1  | 0.16129032 | 30   | 0.086637594 |
| 9875  | GO:0016836            | hydro-lyase activity                                      | 0.42 | 2  | 0.32258064 | 80   | 0.2310336   |
| 4612  | GO:0006468            | protein phosphorylation                                   | 0.42 | 41 | 6.612903   | 2205 | 6.367863    |
| 3476  | GO:0004872 GO:0019041 | receptor activity                                         | 0.43 | 13 | 2.096774   | 672  | 1.9406822   |
| 7222  | GO:0009975            | cyclase activity                                          | 0.43 | 1  | 0.16129032 | 31   | 0.08952551  |
| 29202 | GO:0070838            | divalent metal ion transport                              | 0.43 | 2  | 0.32258064 | 82   | 0.23680943  |
| 9103  | GO:0015837            | amine transport                                           | 0.44 | 3  | 0.48387095 | 135  | 0.38986918  |
| 3787  | GO:0005319            | lipid transporter activity                                | 0.44 | 2  | 0.32258064 | 83   | 0.23969735  |
| 4108  | GO:0005839 GO:0000503 | proteasome core complex                                   | 0.44 | 1  | 0.16129032 | 32   | 0.09241343  |
| 4481  | GO:0006284            | base-excision repair                                      | 0.44 | 1  | 0.16129032 | 32   | 0.09241343  |
| 4510  | GO:0006323            | DNA packaging                                             | 0.44 | 1  | 0.16129032 | 32   | 0.09241343  |
| 4514  | GO:0006334            | nucleosome assembly                                       | 0.44 | 1  | 0.16129032 | 32   | 0.09241343  |
| 12833 | GO:0030275            | LRR domain binding                                        | 0.44 | 1  | 0.16129032 | 32   | 0.09241343  |
| 13920 | GO:0031497            | chromatin assembly                                        | 0.44 | 1  | 0.16129032 | 32   | 0.09241343  |
| 17107 | GO:0034728            | nucleosome organization                                   | 0.44 | 1  | 0.16129032 | 32   | 0.09241343  |
| 28361 | GO:0065004            | protein-DNA complex assembly                              | 0.44 | 1  | 0.16129032 | 32   | 0.09241343  |
| 29467 | GO:0071103            | DNA conformation change                                   | 0.44 | 1  | 0.16129032 | 32   | 0.09241343  |
| 30188 | GO:0071824            | protein-DNA complex subunit                               | 0.44 | 1  | 0.16129032 | 32   | 0.09241343  |
| 3265  | GO:0004630            | phospholipase D activity                                  | 0.44 | 1  | 0.16129032 | 32   | 0.09241343  |
| 3475  | GO:0004871 GO:0005062 | signal transducer activity                                | 0.44 | 15 | 2.419355   | 787  | 2.2727928   |
| 12516 | GO:0022804            | active transmembrane transport                            | 0.44 | 15 | 2.419355   | 787  | 2.2727928   |
| 27063 | GO:0060089            | molecular transducer activity                             | 0.44 | 15 | 2.419355   | 787  | 2.2727928   |
| 3801  | GO:0005342            | organic acid transmembrane transport                      | 0.44 | 3  | 0.48387095 | 136  | 0.3927571   |
| 22444 | GO:0046943            | carboxylic acid transmembrane transport                   | 0.44 | 3  | 0.48387095 | 136  | 0.3927571   |
| 30867 | GO:0072511            | divalent inorganic cation transport                       | 0.45 | 2  | 0.32258064 | 84   | 0.24258527  |
| 4493  | GO:0006298 GO:0006300 | mismatch repair                                           | 0.45 | 1  | 0.16129032 | 33   | 0.09530135  |
| 11222 | GO:0019220            | regulation of phosphate metabolism                        | 0.45 | 2  | 0.32258064 | 85   | 0.24547319  |
| 25471 | GO:0051174            | regulation of phosphorus metabolism                       | 0.45 | 2  | 0.32258064 | 85   | 0.24547319  |
| 31895 | GO:0090304            | nucleic acid metabolic process                            | 0.45 | 43 | 6.935484   | 2340 | 6.7577324   |
| 4942  | GO:0006855            | drug transmembrane transport                              | 0.45 | 3  | 0.48387095 | 139  | 0.40142086  |
| 8607  | GO:0015197 GO:0015637 | peptide transporter activity                              | 0.45 | 3  | 0.48387095 | 139  | 0.40142086  |
| 8608  | GO:0015198            | oligopeptide transporter activity                         | 0.45 | 3  | 0.48387095 | 139  | 0.40142086  |
| 8642  | GO:0015238 GO:0015239 | drug transmembrane transport                              | 0.45 | 3  | 0.48387095 | 139  | 0.40142086  |
| 9154  | GO:0015893            | drug transport                                            | 0.45 | 3  | 0.48387095 | 139  | 0.40142086  |
| 18832 | GO:0042493 GO:0017035 | response to drug                                          | 0.45 | 3  | 0.48387095 | 139  | 0.40142086  |
| 2897  | GO:0004091 GO:0004302 | carboxylesterase activity                                 | 0.46 | 4  | 0.6451613  | 194  | 0.5602564   |
| 3749  | GO:0005249            | voltage-gated potassium channel activity                  | 0.46 | 1  | 0.16129032 | 34   | 0.09818927  |
| 5717  | GO:0008173            | RNA methyltransferase activity                            | 0.46 | 1  | 0.16129032 | 34   | 0.09818927  |
| 6072  | GO:0008645            | hexose transport                                          | 0.46 | 1  | 0.16129032 | 34   | 0.09818927  |
| 8562  | GO:0015149            | hexose transmembrane transport                            | 0.46 | 1  | 0.16129032 | 34   | 0.09818927  |
| 11831 | GO:0019902            | phosphatase binding                                       | 0.46 | 1  | 0.16129032 | 34   | 0.09818927  |
| 11832 | GO:0019903            | protein phosphatase binding                               | 0.46 | 1  | 0.16129032 | 34   | 0.09818927  |
| 17794 | GO:0035428            | hexose transmembrane transport                            | 0.46 | 1  | 0.16129032 | 34   | 0.09818927  |
| 4944  | GO:0006857            | oligopeptide transport                                    | 0.46 | 3  | 0.48387095 | 141  | 0.4071967   |
| 9099  | GO:0015833            | peptide transport                                         | 0.46 | 3  | 0.48387095 | 141  | 0.4071967   |
| 4538  | GO:0006364 GO:0006365 | rRNA processing                                           | 0.47 | 1  | 0.16129032 | 35   | 0.10107719  |
| 6355  | GO:0008970            | phospholipase A1 activity                                 | 0.47 | 1  | 0.16129032 | 35   | 0.10107719  |
| 9310  | GO:0016072            | rRNA metabolic process                                    | 0.47 | 1  | 0.16129032 | 35   | 0.10107719  |
| 23199 | GO:0047714            | galactolipase activity                                    | 0.47 | 1  | 0.16129032 | 35   | 0.10107719  |
| 8557  | GO:0015144            | carbohydrate transmembrane transport                      | 0.47 | 3  | 0.48387095 | 143  | 0.41297254  |
| 16602 | GO:0034219            | carbohydrate transmembrane transport                      | 0.47 | 3  | 0.48387095 | 143  | 0.41297254  |
| 4513  | GO:0006333            | chromatin assembly or disassembly                         | 0.48 | 1  | 0.16129032 | 36   | 0.10396511  |
| 9185  | GO:0015925            | galactosidase activity                                    | 0.48 | 1  | 0.16129032 | 36   | 0.10396511  |
| 3758  | GO:0005267            | potassium channel activity                                | 0.49 | 1  | 0.16129032 | 37   | 0.10685303  |
| 8934  | GO:0015662            | ATPase activity, coupled to transport                     | 0.49 | 1  | 0.16129032 | 37   | 0.10685303  |
| 30069 | GO:0071705            | nitrogen compound transport                               | 0.49 | 4  | 0.6451613  | 202  | 0.5833598   |
| 6071  | GO:0008643 GO:0006810 | carbohydrate transport                                    | 0.49 | 3  | 0.48387095 | 147  | 0.42452422  |
| 5840  | GO:0008324            | cation transmembrane transport                            | 0.50 | 10 | 1.6129032  | 538  | 1.5537009   |
| 6893  | GO:0009620 GO:0009621 | response to fungus                                        | 0.50 | 1  | 0.16129032 | 38   | 0.10974095  |
| 8501  | GO:0015085            | calcium ion transmembrane transport                       | 0.50 | 1  | 0.16129032 | 38   | 0.10974095  |
| 8588  | GO:0015175            | neutral amino acid transmembrane transport                | 0.50 | 1  | 0.16129032 | 38   | 0.10974095  |
| 9073  | GO:0015804            | neutral amino acid transport                              | 0.50 | 1  | 0.16129032 | 38   | 0.10974095  |
| 9637  | GO:0016538 GO:0003751 | cyclin-dependent protein kinase activity                  | 0.50 | 1  | 0.16129032 | 38   | 0.10974095  |
| 12538 | GO:0022843            | voltage-gated cation channel activity                     | 0.50 | 1  | 0.16129032 | 38   | 0.10974095  |
| 117   | GO:0000149            | SNARE binding                                             | 0.50 | 1  | 0.16129032 | 38   | 0.10974095  |
| 20336 | GO:0044085            | cellular component biogenesis                             | 0.50 | 2  | 0.32258064 | 93   | 0.26857653  |
| 868   | GO:0001510            | RNA methylation                                           | 0.51 | 1  | 0.16129032 | 39   | 0.11262887  |
| 18633 | GO:0042277            | peptide binding                                           | 0.51 | 2  | 0.32258064 | 95   | 0.27435237  |
| 5732  | GO:0008194            | UDP-glycosyltransferase activity                          | 0.52 | 6  | 0.9677419  | 322  | 0.9299102   |
| 2628  | GO:0003677            | DNA binding                                               | 0.52 | 22 | 3.548387   | 1224 | 3.548414    |
| 4911  | GO:0006812 GO:0006819 | cation transport                                          | 0.52 | 12 | 1.9354838  | 662  | 1.9118029   |
| 3449  | GO:0004842 GO:0004840 | ubiquitin-protein ligase activity                         | 0.53 | 6  | 0.9677419  | 326  | 0.94146186  |
| 8943  | GO:0015672            | monovalent inorganic cation transport                     | 0.53 | 7  | 1.1290323  | 383  | 1.1060733   |
| 9114  | GO:0015849            | organic acid transport                                    | 0.53 | 3  | 0.48387095 | 156  | 0.45051548  |
| 22443 | GO:0046942            | carboxylic acid transport                                 | 0.53 | 3  | 0.48387095 | 156  | 0.45051548  |
| 4874  | GO:0006767            | water-soluble vitamin metabolic process                   | 0.53 | 1  | 0.16129032 | 42   | 0.121292636 |
| 18713 | GO:0042364            | water-soluble vitamin biosynthesis                        | 0.53 | 1  | 0.16129032 | 42   | 0.121292636 |
| 5766  | GO:0008236            | serine-type peptidase activity                            | 0.54 | 4  | 0.6451613  | 214  | 0.6180149   |
| 8495  | GO:0015077            | monovalent inorganic cation transport                     | 0.54 | 4  | 0.6451613  | 214  | 0.6180149   |
| 9654  | GO:0016567            | protein ubiquitination                                    | 0.55 | 6  | 0.9677419  | 332  | 0.9587894   |
| 14854 | GO:0032446            | protein modification by small molecule                    | 0.55 | 6  | 0.9677419  | 332  | 0.9587894   |
| 29011 | GO:0070647            | protein modification by small molecule                    | 0.55 | 6  | 0.9677419  | 332  | 0.9587894   |
| 4873  | GO:0006766            | vitamin metabolic process                                 | 0.55 | 1  | 0.16129032 | 44   | 0.12706847  |
| 4914  | GO:0006816            | calcium ion transport                                     | 0.55 | 1  | 0.16129032 | 44   | 0.12706847  |
| 6477  | GO:0009110            | vitamin biosynthetic process                              | 0.55 | 1  | 0.16129032 | 44   | 0.12706847  |
| 20522 | GO:0044272            | sulfur compound biosynthetic process                      | 0.55 | 1  | 0.16129032 | 44   | 0.12706847  |
| 28952 | GO:0070588            | calcium ion transmembrane transport                       | 0.55 | 1  | 0.16129032 | 44   | 0.12706847  |
| 409   | GO:0000502            | proteasome complex                                        | 0.55 | 1  | 0.16129032 | 44   | 0.12706847  |
| 5195  | GO:0007165 GO:0023033 | signal transduction                                       | 0.55 | 17 | 2.7419355  | 961  | 2.775291    |
| 12602 | GO:0023052 GO:0023046 | signaling                                                 | 0.55 | 17 | 2.7419355  | 961  | 2.775291    |

|       |                       |                                 |      |    |            |      |            |
|-------|-----------------------|---------------------------------|------|----|------------|------|------------|
| 8666  | GO:0015276            | ligand-gated ion channel acti   | 0.56 | 1  | 0.16129032 | 45   | 0.1299564  |
| 11780 | GO:0019829            | cation-transporting ATPase a    | 0.56 | 1  | 0.16129032 | 45   | 0.1299564  |
| 12530 | GO:0022834            | ligand-gated channel activity   | 0.56 | 1  | 0.16129032 | 45   | 0.1299564  |
| 17001 | GO:0034622            | cellular macromolecular corr    | 0.56 | 1  | 0.16129032 | 45   | 0.1299564  |
| 28360 | GO:0065003            | macromolecular complex as       | 0.56 | 1  | 0.16129032 | 45   | 0.1299564  |
| 31431 | GO:0080054            | low affinity nitrate transmem   | 0.56 | 1  | 0.16129032 | 45   | 0.1299564  |
| 9709  | GO:0016627            | oxidoreductase activity, actin  | 0.56 | 2  | 0.32258064 | 104  | 0.30034366 |
| 4641  | GO:0006508            | proteolysis                     | 0.56 | 17 | 2.7419355  | 965  | 2.7868246  |
| 2668  | GO:0003779            | actin binding                   | 0.56 | 2  | 0.32258064 | 105  | 0.3032316  |
| 12498 | GO:0022613            | ribonucleoprotein complex b     | 0.56 | 1  | 0.16129032 | 46   | 0.13284431 |
| 18614 | GO:0042254 GO:0007046 | ribosome biogenesis             | 0.56 | 1  | 0.16129032 | 46   | 0.13284431 |
| 11747 | GO:0019787 GO:0008639 | small conjugating protein liga  | 0.57 | 6  | 0.9677419  | 339  | 0.9790048  |
| 9911  | GO:0016879            | ligase activity, forming carbo  | 0.57 | 8  | 1.2903225  | 456  | 1.3168914  |
| 5714  | GO:0008170            | N-methyltransferase activity,   | 0.57 | 1  | 0.16129032 | 47   | 0.13573223 |
| 6442  | GO:0009073 GO:0016089 | aromatic amino acid family t    | 0.57 | 1  | 0.16129032 | 47   | 0.13573223 |
| 21943 | GO:0046417            | chorismate metabolic proces     | 0.57 | 1  | 0.16129032 | 47   | 0.13573223 |
| 17024 | GO:0034645 GO:0034961 | cellular macromolecule bios     | 0.58 | 35 | 5.645161   | 1999 | 5.7729516  |
| 14591 | GO:0032183            | SUMO binding                    | 0.58 | 1  | 0.16129032 | 48   | 0.13862015 |
| 6428  | GO:0009059 GO:0043284 | macromolecule biosynthetic      | 0.58 | 35 | 5.645161   | 2003 | 5.7845035  |
| 3756  | GO:0052611 GO:0015281 | cation channel activity         | 0.59 | 1  | 0.16129032 | 49   | 0.14150807 |
| 7074  | GO:0009815            | 1-aminocyclopropane-1-carb      | 0.59 | 1  | 0.16129032 | 49   | 0.14150807 |
| 11830 | GO:0019901            | protein kinase binding          | 0.59 | 1  | 0.16129032 | 49   | 0.14150807 |
| 31421 | GO:0080044            | quercetin 7-O-glucosyltransf    | 0.59 | 1  | 0.16129032 | 49   | 0.14150807 |
| 7166  | GO:0009914            | hormone transport               | 0.60 | 1  | 0.16129032 | 50   | 0.14439599 |
| 19914 | GO:0043648            | dicarboxylic acid metabolic p   | 0.60 | 1  | 0.16129032 | 50   | 0.14439599 |
| 27891 | GO:0060918            | auxin transport                 | 0.60 | 1  | 0.16129032 | 50   | 0.14439599 |
| 31536 | GO:0080161            | auxin transmembrane transp      | 0.60 | 1  | 0.16129032 | 50   | 0.14439599 |
| 7173  | GO:0009922            | fatty acid elongase activity    | 0.60 | 1  | 0.16129032 | 51   | 0.14728391 |
| 12492 | GO:0022607            | cellular component assembly     | 0.60 | 1  | 0.16129032 | 51   | 0.14728391 |
| 30207 | GO:0071843            | cellular component biogenes     | 0.60 | 1  | 0.16129032 | 51   | 0.14728391 |
| 30208 | GO:0071844            | cellular component assembly     | 0.60 | 1  | 0.16129032 | 51   | 0.14728391 |
| 9933  | GO:0016903            | oxidoreductase activity, actin  | 0.60 | 2  | 0.32258064 | 113  | 0.32633495 |
| 4215  | GO:0005975            | carbohydrate metabolic proc     | 0.60 | 17 | 2.7419355  | 990  | 2.8590407  |
| 22478 | GO:0046982            | protein heterodimerization ac   | 0.61 | 2  | 0.32258064 | 114  | 0.32922286 |
| 9535  | GO:0016407            | acetyltransferase activity,     | 0.61 | 2  | 0.32258064 | 115  | 0.3321108  |
| 25635 | GO:0051345            | positive regulation of hydroly  | 0.62 | 1  | 0.16129032 | 53   | 0.15305975 |
| 11787 | GO:0019842            | vitamin binding                 | 0.62 | 3  | 0.48387095 | 177  | 0.5111618  |
| 17918 | GO:0035556 GO:0007242 | intracellular signal transducti | 0.62 | 1  | 0.16129032 | 54   | 0.15594767 |
| 25416 | GO:0051119            | sugar transmembrane transp      | 0.63 | 2  | 0.32258064 | 118  | 0.34077454 |
| 4894  | GO:0006790            | sulfur compound metabolic p     | 0.63 | 1  | 0.16129032 | 55   | 0.15883559 |
| 9493  | GO:0016310            | phosphorylation                 | 0.64 | 43 | 6.935484   | 2504 | 7.2313514  |
| 15576 | GO:0033177            | proton-transporting two-sect    | 0.64 | 1  | 0.16129032 | 56   | 0.16172351 |
| 5712  | GO:0008168 GO:0004480 | methyltransferase activity,     | 0.64 | 4  | 0.6451613  | 244  | 0.7046524  |
| 5715  | GO:0008171            | O-methyltransferase activity,   | 0.64 | 1  | 0.16129032 | 57   | 0.16461143 |
| 5964  | GO:0008483            | transaminase activity           | 0.64 | 1  | 0.16129032 | 57   | 0.16461143 |
| 6441  | GO:0009072            | aromatic amino acid family r    | 0.64 | 1  | 0.16129032 | 57   | 0.16461143 |
| 9813  | GO:0016759            | cellulose synthase activity     | 0.64 | 1  | 0.16129032 | 57   | 0.16461143 |
| 9821  | GO:0016769            | transferase activity, transferr | 0.64 | 1  | 0.16129032 | 57   | 0.16461143 |
| 25195 | GO:0050896 GO:0051869 | response to stimulus            | 0.64 | 32 | 5.16129    | 1881 | 5.432177   |
| 4913  | GO:0006814 GO:0006834 | sodium ion transport            | 0.65 | 1  | 0.16129032 | 58   | 0.16749935 |
| 8028  | GO:0010817            | regulation of hormone levels    | 0.65 | 1  | 0.16129032 | 58   | 0.16749935 |
| 8499  | GO:0015081 GO:0022816 | sodium ion transmembrane t      | 0.65 | 1  | 0.16129032 | 58   | 0.16749935 |
| 11820 | GO:0019887            | protein kinase regulator activ  | 0.65 | 1  | 0.16129032 | 58   | 0.16749935 |
| 18086 | GO:0035725            | sodium ion transmembrane t      | 0.65 | 1  | 0.16129032 | 58   | 0.16749935 |
| 25989 | GO:0051707 GO:0009613 | response to other organism      | 0.65 | 1  | 0.16129032 | 58   | 0.16749935 |
| 29800 | GO:0071436            | sodium ion export               | 0.65 | 1  | 0.16129032 | 58   | 0.16749935 |
| 3323  | GO:0004702            | receptor signaling protein se   | 0.65 | 1  | 0.16129032 | 58   | 0.16749935 |
| 13656 | GO:0031224            | intrinsic to membrane           | 0.65 | 20 | 3.2258065  | 1193 | 3.4452884  |
| 25998 | GO:0051716            | cellular response to stimulus   | 0.65 | 19 | 3.064516   | 1138 | 3.2864528  |
| 9900  | GO:0016866            | intramolecular transferase ac   | 0.66 | 1  | 0.16129032 | 59   | 0.17038727 |
| 2831  | GO:0004022            | alcohol dehydrogenase (NAD      | 0.66 | 1  | 0.16129032 | 59   | 0.17038727 |
| 5652  | GO:0008081 GO:0004434 | phosphoric diester hydrolase    | 0.66 | 1  | 0.16129032 | 60   | 0.17327519 |
| 12741 | GO:0030170            | pyridoxal phosphate binding     | 0.66 | 2  | 0.32258064 | 126  | 0.3638779  |
| 28643 | GO:0070279            | vitamin B6 binding              | 0.66 | 2  | 0.32258064 | 126  | 0.3638779  |
| 2818  | GO:0004003            | ATP-dependent DNA helicase      | 0.67 | 1  | 0.16129032 | 61   | 0.1761631  |
| 22415 | GO:0046914            | transition metal ion binding    | 0.67 | 44 | 7.096774   | 2599 | 7.5057034  |
| 11210 | GO:0019207            | kinase regulator activity       | 0.67 | 1  | 0.16129032 | 62   | 0.17905103 |
| 17000 | GO:0034621            | cellular macromolecular corr    | 0.67 | 1  | 0.16129032 | 62   | 0.17905103 |
| 17457 | GO:0035091            | phosphatidylinositol binding    | 0.67 | 1  | 0.16129032 | 62   | 0.17905103 |
| 20186 | GO:0043933 GO:0034600 | macromolecular complex su       | 0.67 | 1  | 0.16129032 | 62   | 0.17905103 |
| 20883 | GO:0045259 GO:0045255 | proton-transporting ATP synt    | 0.67 | 1  | 0.16129032 | 62   | 0.17905103 |
| 25987 | GO:0051704 GO:0051706 | multi-organism process          | 0.67 | 1  | 0.16129032 | 62   | 0.17905103 |
| 2975  | GO:0004175 GO:0016809 | endopeptidase activity          | 0.68 | 5  | 0.8064516  | 320  | 0.9241344  |
| 5809  | GO:0008289            | lipid binding                   | 0.68 | 4  | 0.6451613  | 258  | 0.74508333 |
| 9488  | GO:0016301            | kinase activity                 | 0.68 | 29 | 4.677419   | 1740 | 5.0249805  |
| 4609  | GO:0006464            | protein modification process    | 0.68 | 47 | 7.580645   | 2781 | 8.031305   |
| 25820 | GO:0051536            | iron-sulfur cluster binding     | 0.69 | 1  | 0.16129032 | 64   | 0.18482687 |
| 25824 | GO:0051540            | metal cluster binding           | 0.69 | 1  | 0.16129032 | 64   | 0.18482687 |
| 9796  | GO:0016741            | transferase activity, transferr | 0.69 | 4  | 0.6451613  | 261  | 0.7537471  |
| 9710  | GO:0016628            | oxidoreductase activity, actin  | 0.69 | 1  | 0.16129032 | 65   | 0.18771479 |
| 25314 | GO:0051015            | actin filament binding          | 0.69 | 1  | 0.16129032 | 65   | 0.18771479 |
| 10244 | GO:0018130            | heterocycle biosynthetic proc   | 0.69 | 3  | 0.48387095 | 199  | 0.57469606 |
| 5651  | GO:0008080            | N-acetyltransferase activity,   | 0.70 | 1  | 0.16129032 | 67   | 0.19349062 |
| 2629  | GO:0003678 GO:0003679 | DNA helicase activity           | 0.70 | 1  | 0.16129032 | 67   | 0.19349062 |
| 18955 | GO:0042625            | ATPase activity, coupled to t   | 0.71 | 1  | 0.16129032 | 68   | 0.19637854 |
| 2999  | GO:0004312            | fatty acid synthase activity    | 0.71 | 1  | 0.16129032 | 68   | 0.19637854 |
| 3620  | GO:0005057            | receptor signaling protein ac   | 0.71 | 1  | 0.16129032 | 69   | 0.19926646 |
| 9722  | GO:0016641            | oxidoreductase activity, actin  | 0.71 | 1  | 0.16129032 | 69   | 0.19926646 |
| 31420 | GO:0080043            | quercetin 3-O-glucosyltransf    | 0.71 | 1  | 0.16129032 | 69   | 0.19926646 |
| 4408  | GO:0006200            | ATP catabolic process           | 0.71 | 10 | 1.6129032  | 641  | 1.8511566  |
| 9918  | GO:0016887 GO:0004002 | ATPase activity                 | 0.71 | 10 | 1.6129032  | 641  | 1.8511566  |
| 21600 | GO:0046034            | ATP metabolic process           | 0.71 | 10 | 1.6129032  | 641  | 1.8511566  |
| 716   | GO:0001071            | nucleic acid binding transcrip  | 0.71 | 23 | 3.7096775  | 1417 | 4.0921826  |
| 2643  | GO:0003700 GO:0000130 | sequence-specific DNA bind      | 0.71 | 23 | 3.7096775  | 1417 | 4.0921826  |
| 15436 | GO:0033036            | macromolecule localization      | 0.72 | 6  | 0.9677419  | 397  | 1.1465042  |
| 3895  | GO:0005543            | phospholipid binding            | 0.72 | 2  | 0.32258064 | 140  | 0.40430877 |
| 9191  | GO:0015931            | nucleobase, nucleoside, nuc     | 0.72 | 1  | 0.16129032 | 70   | 0.20215438 |
| 9192  | GO:0015932            | nucleobase, nucleoside, nuc     | 0.72 | 1  | 0.16129032 | 70   | 0.20215438 |
| 8676  | GO:0015294            | solute:cation symporter activ   | 0.72 | 2  | 0.32258064 | 141  | 0.4071967  |
| 12547 | GO:0022857 GO:0005386 | transmembrane transporter f     | 0.72 | 24 | 3.8709676  | 1483 | 4.282785   |
| 3744  | GO:0005244            | voltage-gated ion channel ac    | 0.73 | 1  | 0.16129032 | 72   | 0.20793022 |
| 6475  | GO:0009108            | coenzyme biosynthetic proces    | 0.73 | 1  | 0.16129032 | 72   | 0.20793022 |
| 9740  | GO:0016667            | oxidoreductase activity, actin  | 0.73 | 1  | 0.16129032 | 72   | 0.20793022 |
| 12528 | GO:0022832            | voltage-gated channel activit   | 0.73 | 1  | 0.16129032 | 72   | 0.20793022 |
| 15280 | GO:0032879            | regulation of localization      | 0.73 | 1  | 0.16129032 | 72   | 0.20793022 |
| 17141 | GO:0034762            | regulation of transmembrane     | 0.73 | 1  | 0.16129032 | 72   | 0.20793022 |
| 17144 | GO:0034765            | regulation of ion transmembr    | 0.73 | 1  | 0.16129032 | 72   | 0.20793022 |
| 19568 | GO:0043269            | regulation of ion transport     | 0.73 | 1  | 0.16129032 | 72   | 0.20793022 |
| 25348 | GO:0051049            | regulation of transport         | 0.73 | 1  | 0.16129032 | 72   | 0.20793022 |
| 21058 | GO:0045454 GO:0030503 | cell redox homeostasis          | 0.73 | 3  | 0.48387095 | 211  | 0.6093511  |
| 9703  | GO:0016620            | oxidoreductase activity, actin  | 0.73 | 1  | 0.16129032 | 73   | 0.21081814 |
| 19684 | GO:0043412            | macromolecule modification      | 0.74 | 48 | 7.7419353  | 2900 | 8.374968   |
| 9817  | GO:0016763            | transferase activity, transferr | 0.74 | 1  | 0.16129032 | 74   | 0.21370606 |
| 3965  | GO:0005654            | nucleoplasm                     | 0.74 | 1  | 0.16129032 | 75   | 0.21659398 |
| 20645 | GO:0044451            | nucleoplasm part                | 0.74 | 1  | 0.16129032 | 75   | 0.21659398 |
| 9829  | GO:0016779            | nucleotidyltransferase activi   | 0.75 | 2  | 0.32258064 | 148  | 0.42741212 |
| 5663  | GO:0008094 GO:0004011 | DNA-dependent ATPase act        | 0.75 | 1  | 0.16129032 | 76   | 0.2194819  |
| 18953 | GO:0042623            | ATPase activity, coupled        | 0.75 | 8  | 1.2903225  | 537  | 1.50813    |
| 4478  | GO:0006281            | DNA repair                      | 0.75 | 2  | 0.32258064 | 149  | 0.43030006 |
| 5037  | GO:0006974 GO:0034984 | response to DNA damage st       | 0.75 | 2  | 0.32258064 | 149  | 0.43030006 |
| 11426 | GO:0019438            | aromatic compound biosynt       | 0.75 | 2  | 0.32258064 | 149  | 0.43030006 |
| 9538  | GO:0016410            | N-acyltransferase activity      | 0.75 | 1  | 0.16129032 | 77   | 0.22236982 |



|       |                          |                                 |      |     |            |      |            |
|-------|--------------------------|---------------------------------|------|-----|------------|------|------------|
| 14667 | GO:0032259               | methylation                     | 0.75 | 4   | 0.6451613  | 285  | 0.8230572  |
| 9823  | GO:0016772               | transferase activity, transferr | 0.76 | 31  | 5          | 1932 | 5.579461   |
| 4358  | GO:0006140               | regulation of nucleotide meta   | 0.76 | 1   | 0.16129032 | 80   | 0.2310336  |
| 7146  | GO:0009894               | regulation of catabolic proce   | 0.76 | 1   | 0.16129032 | 80   | 0.2310336  |
| 13278 | GO:0030811               | regulation of nucleotide cata   | 0.76 | 1   | 0.16129032 | 80   | 0.2310336  |
| 13759 | GO:0031329               | regulation of cellular cataboli | 0.76 | 1   | 0.16129032 | 80   | 0.2310336  |
| 15521 | GO:0033121               | regulation of purine nucleotid  | 0.76 | 1   | 0.16129032 | 80   | 0.2310336  |
| 8517  | GO:0015103               | inorganic anion transmembra     | 0.77 | 2   | 0.32258064 | 154  | 0.44473964 |
| 4357  | GO:0006139 GO:0055134    | nucleobase, nucleoside, nuc     | 0.77 | 54  | 8.709678   | 3285 | 9.486816   |
| 18674 | GO:0042325               | regulation of phosphorylatio    | 0.77 | 1   | 0.16129032 | 81   | 0.23392151 |
| 4990  | GO:0006915 GO:0008632    | apoptosis                       | 0.77 | 3   | 0.48387095 | 227  | 0.6555578  |
| 19831 | GO:0043565               | sequence-specific DNA bind      | 0.78 | 2   | 0.32258064 | 159  | 0.45917925 |
| 5624  | GO:0008047               | enzyme activator activity       | 0.79 | 1   | 0.16129032 | 85   | 0.24547319 |
| 3307  | GO:0004675               | transmembrane receptor pro      | 0.79 | 5   | 0.8064516  | 367  | 1.0598665  |
| 19473 | GO:0043170 GO:0043283    | macromolecule metabolic pr      | 0.79 | 110 | 17.741936  | 6553 | 18.92454   |
| 3723  | GO:0005215 GO:0005478    | transporter activity            | 0.79 | 29  | 4.677419   | 1844 | 5.325324   |
| 11695 | GO:0019725               | cellular homeostasis            | 0.79 | 3   | 0.48387095 | 234  | 0.67577326 |
| 26931 | GO:0055085               | transmembrane transport         | 0.79 | 24  | 3.8709676  | 1548 | 4.4705     |
| 11828 | GO:0019899               | enzyme binding                  | 0.80 | 3   | 0.48387095 | 237  | 0.684437   |
| 9719  | GO:0016638               | oxidoreductase activity, acti   | 0.80 | 1   | 0.16129032 | 89   | 0.25702485 |
| 18925 | GO:0042592               | homeostatic process             | 0.80 | 3   | 0.48387095 | 238  | 0.68732494 |
| 4897  | GO:0006793               | phosphorus metabolic proce      | 0.80 | 47  | 7.580645   | 2925 | 8.4471655  |
| 4900  | GO:0006796               | phosphate metabolic proces      | 0.80 | 47  | 7.580645   | 2925 | 8.4471655  |
| 5756  | GO:0008219               | cell death                      | 0.80 | 3   | 0.48387095 | 239  | 0.69021285 |
| 8209  | GO:0012501 GO:0016244    | programmed cell death           | 0.80 | 3   | 0.48387095 | 239  | 0.69021285 |
| 9462  | GO:0016265               | death                           | 0.80 | 3   | 0.48387095 | 239  | 0.69021285 |
| 14590 | GO:0032182               | small conjugating protein bin   | 0.80 | 1   | 0.16129032 | 90   | 0.2599128  |
| 3644  | GO:0005102               | receptor binding                | 0.81 | 1   | 0.16129032 | 91   | 0.2628007  |
| 6784  | GO:0009451 GO:0016547    | RNA modification                | 0.81 | 1   | 0.16129032 | 91   | 0.2628007  |
| 8494  | GO:0015075               | ion transmembrane transport     | 0.81 | 12  | 1.9354838  | 827  | 2.3883097  |
| 9579  | GO:0016462               | pyrophosphatase activity        | 0.81 | 14  | 2.2580645  | 954  | 2.7550755  |
| 9859  | GO:0016818               | hydrolase activity, acting on   | 0.81 | 14  | 2.2580645  | 956  | 2.7608514  |
| 16603 | GO:0034220               | ion transmembrane transport     | 0.82 | 12  | 1.9354838  | 833  | 2.4056373  |
| 4910  | GO:0006811               | ion transport                   | 0.82 | 14  | 2.2580645  | 959  | 2.769515   |
| 9858  | GO:0016817               | hydrolase activity, acting on   | 0.82 | 14  | 2.2580645  | 959  | 2.769515   |
| 3808  | GO:0005351 GO:0005403    | sugar:hydrogen symporter ac     | 0.82 | 1   | 0.16129032 | 94   | 0.27146447 |
| 3835  | GO:0005402               | cation:sugar symporter activ    | 0.82 | 1   | 0.16129032 | 94   | 0.27146447 |
| 15949 | GO:0033554               | cellular response to stress     | 0.82 | 2   | 0.32258064 | 173  | 0.49961013 |
| 4526  | GO:0006351 GO:0006350    | transcription, DNA-depende      | 0.82 | 24  | 3.8709676  | 1575 | 4.548474   |
| 15176 | GO:0032774               | RNA biosynthetic process        | 0.82 | 24  | 3.8709676  | 1575 | 4.548474   |
| 28365 | GO:0065008               | regulation of biological qualit | 0.82 | 4   | 0.6451613  | 316  | 0.9125827  |
| 4067  | GO:0005783               | endoplasmic reticulum           | 0.82 | 2   | 0.32258064 | 174  | 0.50249803 |
| 8967  | GO:0015698               | inorganic anion transport       | 0.83 | 2   | 0.32258064 | 176  | 0.5082739  |
| 8677  | GO:0015295               | solute:hydrogen symporter a     | 0.83 | 1   | 0.16129032 | 98   | 0.28301615 |
| 8681  | GO:0015299               | solute:hydrogen antiporter ac   | 0.83 | 1   | 0.16129032 | 98   | 0.28301615 |
| 25379 | GO:00051082              | unfolded protein binding        | 0.83 | 1   | 0.16129032 | 98   | 0.28301615 |
| 4909  | GO:0006810 GO:0015457 GO | transport                       | 0.83 | 36  | 5.806452   | 2315 | 6.6855345  |
| 25529 | GO:00051234              | establishment of localization   | 0.83 | 36  | 5.806452   | 2315 | 6.6855345  |
| 16851 | GO:0034470               | ncRNA processing                | 0.83 | 1   | 0.16129032 | 99   | 0.28590405 |
| 17039 | GO:0034660               | ncRNA metabolic process         | 0.83 | 1   | 0.16129032 | 99   | 0.28590405 |
| 3716  | GO:0005198               | structural molecule activity    | 0.83 | 5   | 0.8064516  | 393  | 1.1349525  |
| 25476 | GO:00051179              | localization                    | 0.84 | 36  | 5.806452   | 2319 | 6.697086   |
| 4849  | GO:0006730 GO:0019753 GO | one-carbon metabolic proce      | 0.84 | 4   | 0.6451613  | 325  | 0.93857396 |
| 16430 | GO:0034046               | poly(G) RNA binding             | 0.84 | 1   | 0.16129032 | 100  | 0.28879198 |
| 6663  | GO:0009309               | amine biosynthetic process      | 0.84 | 2   | 0.32258064 | 181  | 0.5227135  |
| 5874  | GO:0008374               | O-acyltransferase activity      | 0.84 | 1   | 0.16129032 | 102  | 0.29456782 |
| 4844  | GO:0006725               | cellular aromatic compound      | 0.85 | 2   | 0.32258064 | 185  | 0.53426516 |
| 19392 | GO:0043085               | positive regulation of catalyti | 0.85 | 1   | 0.16129032 | 104  | 0.30034366 |
| 20343 | GO:0044093               | positive regulation of molecu   | 0.85 | 1   | 0.16129032 | 104  | 0.30034366 |
| 12573 | GO:0022891               | substrate-specific transmem     | 0.85 | 18  | 2.903226   | 1241 | 3.5839086  |
| 8673  | GO:0015291 GO:0015290 GO | secondary active transmem       | 0.86 | 5   | 0.8064516  | 407  | 1.1753833  |
| 3942  | GO:0005618               | cell wall                       | 0.86 | 1   | 0.16129032 | 107  | 0.30900744 |
| 11833 | GO:0019904               | protein domain specific bindi   | 0.86 | 1   | 0.16129032 | 109  | 0.31478328 |
| 10058 | GO:0017111               | nucleoside-triphosphatase ac    | 0.86 | 12  | 1.9354838  | 878  | 2.5355935  |
| 17020 | GO:0034641               | cellular nitrogen compound r    | 0.86 | 58  | 9.354838   | 3678 | 10.621769  |
| 12868 | GO:0030312               | external encapsulating struct   | 0.87 | 1   | 0.16129032 | 111  | 0.3205591  |
| 4512  | GO:0006325               | chromatin organization          | 0.87 | 1   | 0.16129032 | 112  | 0.32344702 |
| 5070  | GO:0007017               | microtubule-based process       | 0.87 | 1   | 0.16129032 | 112  | 0.32344702 |
| 5071  | GO:0007018               | microtubule-based moveme        | 0.87 | 1   | 0.16129032 | 112  | 0.32344702 |
| 8680  | GO:0015298               | solute:cation antiporter activ  | 0.87 | 1   | 0.16129032 | 112  | 0.32344702 |
| 9730  | GO:0016651               | oxidoreductase activity, acti   | 0.87 | 1   | 0.16129032 | 112  | 0.32344702 |
| 25568 | GO:0051276 GO:0007001 GO | chromosome organization         | 0.87 | 1   | 0.16129032 | 112  | 0.32344702 |
| 29081 | GO:0070717               | poly-purine tract binding       | 0.87 | 1   | 0.16129032 | 112  | 0.32344702 |
| 4850  | GO:0006732 GO:0006752    | coenzyme metabolic proces       | 0.87 | 1   | 0.16129032 | 113  | 0.32633495 |
| 19686 | GO:0043414               | macromolecule methylation       | 0.87 | 1   | 0.16129032 | 113  | 0.32633495 |
| 20510 | GO:0044260 GO:0034960    | cellular macromolecule meta     | 0.87 | 90  | 14.5161295 | 5677 | 16.105928  |
| 12574 | GO:0022892               | substrate-specific transporte   | 0.88 | 21  | 3.387097   | 1463 | 4.2250266  |
| 11522 | GO:0019538 GO:0006411    | protein metabolic process       | 0.88 | 65  | 10.4838705 | 4134 | 11.938661  |
| 4906  | GO:0006807               | nitrogen compound metaboli      | 0.89 | 58  | 9.354838   | 3725 | 10.757502  |
| 4405  | GO:0006195               | purine nucleotide catabolic p   | 0.89 | 10  | 0.16129032 | 773  | 2.232362   |
| 6508  | GO:0009143               | nucleoside triphosphate cata    | 0.89 | 10  | 0.16129032 | 773  | 2.232362   |
| 6509  | GO:0009144               | purine nucleoside triphospha    | 0.89 | 10  | 0.16129032 | 773  | 2.232362   |
| 6511  | GO:0009146               | purine nucleoside triphospha    | 0.89 | 10  | 0.16129032 | 773  | 2.232362   |
| 6519  | GO:0009154               | purine ribonucleotide catabo    | 0.89 | 10  | 0.16129032 | 773  | 2.232362   |
| 6530  | GO:0009166               | nucleotide catabolic process    | 0.89 | 10  | 0.16129032 | 773  | 2.232362   |
| 6567  | GO:0009203               | ribonucleoside triphosphate c   | 0.89 | 10  | 0.16129032 | 773  | 2.232362   |
| 6569  | GO:0009205               | purine ribonucleoside triphos   | 0.89 | 10  | 0.16129032 | 773  | 2.232362   |
| 6571  | GO:0009207               | purine ribonucleoside triphos   | 0.89 | 10  | 0.16129032 | 773  | 2.232362   |
| 6624  | GO:0009261               | ribonucleotide catabolic proc   | 0.89 | 10  | 0.16129032 | 773  | 2.232362   |
| 17034 | GO:0034655               | nucleobase, nucleoside, nuc     | 0.89 | 10  | 0.16129032 | 773  | 2.232362   |
| 17035 | GO:0034656               | nucleobase, nucleoside and      | 0.89 | 10  | 0.16129032 | 773  | 2.232362   |
| 22209 | GO:0046700               | heterocycle catabolic proces    | 0.89 | 10  | 0.16129032 | 773  | 2.232362   |
| 30879 | GO:0072523               | purine-containing compound      | 0.89 | 10  | 0.16129032 | 773  | 2.232362   |
| 12532 | GO:0022836               | gated channel activity          | 0.89 | 1   | 0.16129032 | 122  | 0.3523262  |
| 9267  | GO:0016021               | integral to membrane            | 0.89 | 15  | 2.419355   | 1103 | 3.1853757  |
| 20520 | GO:0044270               | cellular nitrogen compound c    | 0.89 | 10  | 0.16129032 | 777  | 2.2439137  |
| 14392 | GO:0031981               | nuclear lumen                   | 0.89 | 1   | 0.16129032 | 123  | 0.35521415 |
| 25485 | GO:0051188               | cofactor biosynthetic proces    | 0.89 | 1   | 0.16129032 | 123  | 0.35521415 |
| 9295  | GO:0016053               | organic acid biosynthetic pro   | 0.89 | 2   | 0.32258064 | 211  | 0.6093511  |
| 21922 | GO:0046394               | carboxylic acid biosynthetic p  | 0.89 | 2   | 0.32258064 | 211  | 0.6093511  |
| 4916  | GO:0006818               | hydrogen transport              | 0.90 | 3   | 0.48387095 | 292  | 0.84327257 |
| 9246  | GO:0015992               | proton transport                | 0.90 | 3   | 0.48387095 | 292  | 0.84327257 |
| 9583  | GO:0016469               | proton-transporting two-sect    | 0.90 | 1   | 0.16129032 | 127  | 0.36676583 |
| 6563  | GO:0009199               | ribonucleoside triphosphate r   | 0.90 | 10  | 0.16129032 | 790  | 2.2814567  |
| 6515  | GO:0009150               | purine ribonucleotide metab     | 0.90 | 10  | 0.16129032 | 791  | 2.2843447  |
| 22479 | GO:0046983               | protein dimerization activity   | 0.90 | 6   | 0.9677419  | 517  | 1.4930545  |
| 6506  | GO:0009141               | nucleoside triphosphate met     | 0.91 | 10  | 0.16129032 | 796  | 2.2987843  |
| 20356 | GO:0044106               | cellular amine metabolic pro    | 0.91 | 3   | 0.48387095 | 303  | 0.8750397  |
| 20619 | GO:0044425               | membrane part                   | 0.91 | 21  | 3.387097   | 1523 | 4.398302   |
| 19532 | GO:0043233               | organelle lumen                 | 0.92 | 1   | 0.16129032 | 137  | 0.39564502 |
| 28380 | GO:0070013               | intracellular organelle lumen   | 0.92 | 1   | 0.16129032 | 137  | 0.39564502 |
| 4373  | GO:0006163               | purine nucleotide metabolic p   | 0.92 | 10  | 0.16129032 | 810  | 2.339215   |
| 6622  | GO:0009259 GO:0009121    | ribonucleotide metabolic pro    | 0.92 | 10  | 0.16129032 | 812  | 2.344991   |
| 13531 | GO:0031072               | heat shock protein binding      | 0.92 | 2   | 0.32258064 | 230  | 0.6642216  |
| 20531 | GO:0044281               | small molecule metabolic pro    | 0.92 | 25  | 4.032258   | 1788 | 5.1636004  |
| 28378 | GO:0070011               | peptidase activity, acting on   | 0.92 | 6   | 0.9677419  | 537  | 1.508113   |
| 3724  | GO:0005216               | ion channel activity            | 0.92 | 1   | 0.16129032 | 140  | 0.40430877 |
| 6662  | GO:0009308               | amine metabolic process         | 0.92 | 3   | 0.48387095 | 314  | 0.9068068  |
| 30877 | GO:0072521               | purine-containing compound      | 0.93 | 10  | 0.16129032 | 827  | 2.3883097  |
| 9895  | GO:0016860               | intramolecular oxidoreductas    | 0.93 | 1   | 0.16129032 | 146  | 0.42163628 |
| 5791  | GO:0008270               | zinc ion binding                | 0.93 | 26  | 4.193548   | 1880 | 5.4292893  |
| 20499 | GO:0044249               | cellular biosynthetic process   | 0.93 | 38  | 6.129032   | 2635 | 7.6096687  |

|       |                                  |                                                         |      |     |            |       |            |
|-------|----------------------------------|---------------------------------------------------------|------|-----|------------|-------|------------|
| 18582 | GO:0042221                       | response to chemical stimulus                           | 0.93 | 3   | 0.48387095 | 328   | 0.94723773 |
| 5981  | GO:0008509                       | anion transmembrane transport                           | 0.94 | 2   | 0.32258064 | 245   | 0.70754033 |
| 8679  | GO:0015297                       | antipporter activity                                    | 0.94 | 1   | 0.16129032 | 152   | 0.4389638  |
| 8682  | GO:0015300                       | solute:solute antiporter activity                       | 0.94 | 1   | 0.16129032 | 152   | 0.4389638  |
| 27562 | GO:0060589                       | nucleoside-triphosphatase re                            | 0.94 | 1   | 0.16129032 | 152   | 0.4389638  |
| 2660  | GO:0003735 GO:0003736            | structural constituent of ribosome                      | 0.94 | 2   | 0.32258064 | 246   | 0.7104283  |
| 5909  | GO:0008415                       | acyltransferase activity                                | 0.94 | 3   | 0.48387095 | 330   | 0.95301354 |
| 4917  | GO:0006820 GO:0006822            | anion transport                                         | 0.94 | 2   | 0.32258064 | 247   | 0.7133162  |
| 14386 | GO:0031974                       | membrane-enclosed lumen                                 | 0.94 | 1   | 0.16129032 | 154   | 0.44473964 |
| 5661  | GO:0008092                       | cytoskeletal protein binding                            | 0.94 | 2   | 0.32258064 | 249   | 0.719092   |
| 5763  | GO:0008233                       | peptidase activity                                      | 0.94 | 6   | 0.9677419  | 565   | 1.6316746  |
| 20532 | GO:0044282                       | small molecule catabolic process                        | 0.94 | 10  | 1.6129032  | 854   | 2.4662836  |
| 8496  | GO:0015078                       | hydrogen ion transmembrane transport                    | 0.94 | 1   | 0.16129032 | 160   | 0.4620672  |
| 20517 | GO:0044267                       | cellular protein metabolic process                      | 0.94 | 47  | 7.580645   | 3225  | 9.313541   |
| 6427  | GO:0009058                       | biosynthetic process                                    | 0.95 | 40  | 6.451613   | 2796  | 8.074624   |
| 9308  | GO:0016070                       | RNA metabolic process                                   | 0.95 | 25  | 4.032258   | 1855  | 5.3570914  |
| 9494  | GO:0016311                       | dephosphorylation                                       | 0.95 | 4   | 0.6451613  | 425   | 1.227366   |
| 5764  | GO:0008234 GO:0004220            | cysteine-type peptidase activity                        | 0.95 | 1   | 0.16129032 | 163   | 0.47073093 |
| 5055  | GO:0006996                       | organelle organization                                  | 0.95 | 1   | 0.16129032 | 164   | 0.47361887 |
| 25483 | GO:0051186                       | cofactor metabolic process                              | 0.95 | 1   | 0.16129032 | 164   | 0.47361887 |
| 20533 | GO:0044283                       | small molecule biosynthetic process                     | 0.95 | 3   | 0.48387095 | 347   | 1.0021082  |
| 19126 | GO:0042803                       | protein homodimerization activity                       | 0.95 | 2   | 0.32258064 | 265   | 0.7652988  |
| 9699  | GO:0016616                       | oxidoreductase activity, acting on NADPH                | 0.95 | 2   | 0.32258064 | 266   | 0.7681867  |
| 6077  | GO:0008652                       | cellular amino acid biosynthesis                        | 0.95 | 1   | 0.16129032 | 169   | 0.48805845 |
| 4755  | GO:0006629                       | lipid metabolic process                                 | 0.95 | 6   | 0.9677419  | 590   | 1.7038727  |
| 22007 | GO:0046483                       | heterocycle metabolic process                           | 0.96 | 13  | 2.096774   | 1094  | 3.1593843  |
| 3955  | GO:0005634                       | nucleus                                                 | 0.96 | 18  | 2.903226   | 1433  | 4.138389   |
| 9768  | GO:0016706                       | oxidoreductase activity, acting on NADH                 | 0.96 | 1   | 0.16129032 | 175   | 0.505386   |
| 18912 | GO:0042578                       | phosphoric ester hydrolase activity                     | 0.96 | 4   | 0.6451613  | 444   | 1.2822365  |
| 4649  | GO:0006520 GO:0006519            | cellular amino acid metabolic process                   | 0.96 | 2   | 0.32258064 | 277   | 0.7995538  |
| 20498 | GO:0044248                       | cellular catabolic process                              | 0.96 | 10  | 1.6129032  | 894   | 2.5818002  |
| 20622 | GO:0044428                       | nuclear part                                            | 0.96 | 1   | 0.16129032 | 178   | 0.5140497  |
| 20521 | GO:0044271                       | cellular nitrogen compound transport                    | 0.96 | 3   | 0.48387095 | 367   | 1.0598665  |
| 4109  | GO:0005840 GO:0033279            | ribosome                                                | 0.96 | 7   | 1.1290323  | 682   | 1.9695613  |
| 7691  | GO:0010467                       | gene expression                                         | 0.96 | 26  | 4.193548   | 1974  | 5.7007537  |
| 5018  | GO:0006950                       | response to stress                                      | 0.96 | 6   | 0.9677419  | 611   | 1.764519   |
| 5610  | GO:0008026                       | ATP-dependent helicase activity                         | 0.96 | 1   | 0.16129032 | 183   | 0.52848935 |
| 28401 | GO:0070035                       | purine NTP-dependent helicase activity                  | 0.96 | 1   | 0.16129032 | 183   | 0.52848935 |
| 6425  | GO:0009056                       | catabolic process                                       | 0.97 | 12  | 1.9354838  | 1051  | 3.0352037  |
| 4867  | GO:0006753                       | nucleoside phosphate metabolic process                  | 0.97 | 10  | 1.6129032  | 914   | 2.6395588  |
| 6484  | GO:0009117                       | nucleotide metabolic process                            | 0.97 | 10  | 1.6129032  | 914   | 2.6395588  |
| 2657  | GO:0003727 GO:0003728            | single-stranded RNA binding                             | 0.97 | 1   | 0.16129032 | 188   | 0.54292893 |
| 3068  | GO:0004386                       | helicase activity                                       | 0.97 | 1   | 0.16129032 | 189   | 0.54581684 |
| 9697  | GO:0016614                       | oxidoreductase activity, acting on NADH                 | 0.97 | 2   | 0.32258064 | 293   | 0.84616053 |
| 9839  | GO:0016791 GO:0016302            | phosphatase activity                                    | 0.97 | 3   | 0.48387095 | 383   | 1.1060733  |
| 2626  | GO:0003674 GO:0005554            | molecular function                                      | 0.97 | 416 | 67.09677   | 24394 | 70.447914  |
| 30206 | GO:0071842                       | cellular component organization                         | 0.97 | 1   | 0.16129032 | 193   | 0.5573685  |
| 20488 | GO:0044238                       | primary metabolic process                               | 0.97 | 144 | 23.225807  | 9167  | 26.47356   |
| 3340  | GO:0004721                       | phosphoprotein phosphatase activity                     | 0.97 | 1   | 0.16129032 | 199   | 0.57469606 |
| 9889  | GO:0016853                       | isomerase activity                                      | 0.97 | 2   | 0.32258064 | 306   | 0.8837035  |
| 26932 | GO:0055086                       | nucleobase, nucleoside and nucleotide metabolic process | 0.98 | 10  | 1.6129032  | 944   | 2.7261963  |
| 13018 | GO:0030529                       | ribonucleoprotein complex                               | 0.98 | 7   | 1.1290323  | 741   | 2.1399486  |
| 4558  | GO:0006396 GO:0006394            | RNA processing                                          | 0.98 | 1   | 0.16129032 | 219   | 0.63245445 |
| 5019  | GO:0006952 GO:0002217 GO:0002218 | defense response                                        | 0.98 | 1   | 0.16129032 | 221   | 0.63823026 |
| 12533 | GO:0022838                       | substrate-specific channel activity                     | 0.98 | 1   | 0.16129032 | 221   | 0.63823026 |
| 8660  | GO:0015267 GO:0015249 GO:0005554 | channel activity                                        | 0.98 | 1   | 0.16129032 | 226   | 0.6526699  |
| 12515 | GO:0022803                       | passive transmembrane transport                         | 0.98 | 1   | 0.16129032 | 226   | 0.6526699  |
| 8211  | GO:0012505                       | endomembrane system                                     | 0.99 | 1   | 0.16129032 | 242   | 0.6988766  |
| 3178  | GO:0004519                       | endonuclease activity                                   | 0.99 | 2   | 0.32258064 | 356   | 1.0280994  |
| 20487 | GO:0044237                       | cellular metabolic process                              | 0.99 | 123 | 19.838709  | 8185  | 23.637265  |
| 30306 | GO:0071944                       | cell periphery                                          | 0.99 | 1   | 0.16129032 | 259   | 0.74797124 |
| 2627  | GO:0003676                       | nucleic acid binding                                    | 0.99 | 30  | 4.83871    | 2453  | 7.0840673  |
| 3177  | GO:0004518                       | nuclease activity                                       | 1.00 | 2   | 0.32258064 | 427   | 1.2331418  |
| 13041 | GO:0030554                       | adenyl nucleotide binding                               | 1.00 | 3   | 0.48387095 | 550   | 1.5883559  |
| 14965 | GO:0032559                       | adenyl ribonucleotide binding                           | 1.00 | 3   | 0.48387095 | 550   | 1.5883559  |
| 19527 | GO:0043228                       | non-membrane-bounded organelle                          | 1.00 | 7   | 1.1290323  | 923   | 2.66555    |
| 19531 | GO:0043232                       | intracellular non-membrane-bounded organelle            | 1.00 | 7   | 1.1290323  | 923   | 2.66555    |
| 19533 | GO:0043234                       | protein complex                                         | 1.00 | 6   | 0.9677419  | 848   | 2.448956   |
| 3876  | GO:0005515 GO:0045308            | protein binding                                         | 1.00 | 97  | 15.645162  | 6933  | 20.021948  |
| 7229  | GO:0009987 GO:0008151 GO:0005554 | cellular process                                        | 1.00 | 157 | 25.32258   | 10601 | 30.614838  |
| 3863  | GO:0005488                       | binding                                                 | 1.00 | 212 | 34.19355   | 13903 | 40.15075   |
| 3884  | GO:0005524                       | ATP binding                                             | 1.00 | 2   | 0.32258064 | 524   | 1.51327    |
| 19125 | GO:0042802                       | identical protein binding                               | 1.00 | 3   | 0.48387095 | 697   | 2.01288    |
| 19526 | GO:0043227                       | membrane-bounded organelle                              | 1.00 | 20  | 3.2258065  | 2142  | 6.185924   |
| 19530 | GO:0043231                       | intracellular membrane-bounded organelle                | 1.00 | 20  | 3.2258065  | 2142  | 6.185924   |
| 15392 | GO:0032991                       | macromolecular complex                                  | 1.00 | 13  | 2.096774   | 1616  | 4.666878   |
| 9266  | GO:0016020                       | membrane                                                | 1.00 | 42  | 6.774194   | 3741  | 10.803708  |
| 131   | GO:0000166                       | nucleotide binding                                      | 1.00 | 8   | 1.2903225  | 1213  | 3.5030468  |
| 14959 | GO:0032553                       | ribonucleotide binding                                  | 1.00 | 3   | 0.48387095 | 795   | 2.2958963  |
| 14961 | GO:0032555                       | purine ribonucleotide binding                           | 1.00 | 3   | 0.48387095 | 795   | 2.2958963  |
| 10033 | GO:0017076                       | purine nucleotide binding                               | 1.00 | 3   | 0.48387095 | 797   | 2.3016722  |
| 18000 | GO:0035639                       | purine ribonucleoside triphosphate binding              | 1.00 | 2   | 0.32258064 | 769   | 2.2208104  |
| 19525 | GO:0043226                       | organelle                                               | 1.00 | 27  | 4.354839   | 3013  | 8.701303   |
| 19528 | GO:0043229                       | intracellular organelle                                 | 1.00 | 27  | 4.354839   | 3013  | 8.701303   |
| 2653  | GO:0003723                       | RNA binding                                             | 1.00 | 2   | 0.32258064 | 797   | 2.3016722  |
| 20640 | GO:0044446                       | intracellular organelle part                            | 1.00 | 1   | 0.16129032 | 710   | 2.0504231  |
| 20616 | GO:0044422                       | organelle part                                          | 1.00 | 1   | 0.16129032 | 712   | 2.0561988  |
| 3945  | GO:0005622                       | intracellular                                           | 1.00 | 49  | 7.903226   | 4751  | 13.720507  |
| 4027  | GO:0005737                       | cytoplasm                                               | 1.00 | 13  | 2.096774   | 2001  | 5.7787275  |
| 20638 | GO:0044444                       | cytoplasmic part                                        | 1.00 | 9   | 1.451613   | 1644  | 4.7477403  |
| 20618 | GO:0044424                       | intracellular part                                      | 1.00 | 36  | 5.806452   | 3853  | 11.127155  |
| 3903  | GO:0005575 GO:0008372            | cellular component                                      | 1.00 | 101 | 16.290323  | 8515  | 24.590637  |
| 3946  | GO:0005623                       | cell                                                    | 1.00 | 92  | 14.83871   | 8227  | 23.758917  |
| 20657 | GO:0044464                       | cell part                                               | 1.00 | 92  | 14.83871   | 8227  | 23.758917  |
