# Supplementary material for: The Tomato Hybrid Proline-rich Protein regulates the abscission zone competence to respond to ethylene signals
Source: PubMed Central journal article supplement (PMC5981600; doi:10.1038/s41438-018-0033-2), 2018-06-01
Supplement: 41438_2018_33_MOESM6_ESM.pdf [file 41438_2018_33_MOESM6_ESM.pdf]

Table S6. Differentially regulated genes (up and down regulated) in the control compared with THyPRP silenced plants in FAZ at 16 h along with their expression values, fold changes, annotations, GO ids and terms.

Worksheet 2 & 3

Cut off used to filter up and down regulated genes

**Upregulated**

For filtering upregulation we consider flag should be Detected in the treated sample and can be Compromised or Detected in the control sample and fold>=0.8 in the individual replicates and fold>=1 in the Geomean of treated samples.

**Downregulated**

For filtering downregulation we consider flag can be Detected or Compromised in the treated sample and should be Detected in the control sample and fold<=-0.8 in the individual replicates and fold<=-1 in the Geomean of treated samples.

| Set5                 |                  |           |      |                 |       |
|----------------------|------------------|-----------|------|-----------------|-------|
| Line                 | Array            | Details   | Time | Treated vs. Con | Set   |
| Control – New Yorker | 254331010027_1_1 | 16h_9_AZ  | 16h  | Control         | Set 5 |
| Control – New Yorker | 254331010027_1_2 | 16h_10_AZ | 16h  |                 |       |
| TAPG + TPRP          | 254331010036_1_1 | 16h_45_AZ | 16h  | Treated         |       |
| TAPG + TPRP          | 254331010036_1_2 | 16h_46_AZ | 16h  |                 |       |

**Note:**

Fold change expression values are provided as logbase 2

**Flagging Criteria:**

Compromised: If the gProcessedSignal value is less than the background intensity

Detected: If the gProcessedSignal value is above background intensity

| Column Header   | Description                                                     |
|-----------------|-----------------------------------------------------------------|
| ProbeName       | Unique probe identifier                                         |
| GeneName        | GeneSymbol                                                      |
| Fold            | Fold change calculated is log base 2                            |
| Flag            | Detected or Compromised                                         |
| GeomeanFold     | Average Fold change for the replicates calculated is log base 2 |
| p-Value         | t-test p- value                                                 |
| gProcessedSigna | Background subtracted signal intensity                          |

**Differentially Regulated Probes**

| Sample                                   | Up   | Down |
|------------------------------------------|------|------|
| 16h_TPRP_AZ vs. 16h_Control_AZ_Sense     | 2408 | 2491 |
| 16h_TPRP_AZ vs. 16h_Control_AZ_Antisense | 1483 | 895  |

Worksheet 4 & 5

This file contains the fold change for all the spots in the array

**GO ID**

Gene Ontology ID

**GO ACCESSION**

Gene Ontology Function name

**p-value :**

The probability of obtaining the specified GO accession number from a list of random entities. Less the p-value more significant is the GO accession number.

**Significant pvalue<0.05**

**Count in Selection :**

This refers to the number of genes in the selected entity (for example, from T-test) list which have that particular GO term.

**%Count in Selection :**

This refers to the percentage of genes in the input entity list which have that GO term.

**Count in Total :**

This refers to the number of genes in All Entities which have that GO term.

**%Count in Total :**

This refers to the percentage of genes in the All Entities list which have that GO term.

























| Q1 | Q2 | Q3 | Q4 | Q5 | Q6 | Q7 | Q8 | Q9 | Q10 | Q11 | Q12 | Q13 | Q14 | Q15 | Q16 | Q17 | Q18 | Q19 | Q20 | Q21 | Q22 | Q23 | Q24 | Q25 | Q26 | Q27 | Q28 | Q29 | Q30 | Q31 | Q32 | Q33 | Q34 | Q35 | Q36 | Q37 | Q38 | Q39 | Q40 | Q41 | Q42 | Q43 | Q44 | Q45 | Q46 | Q47 | Q48 | Q49 | Q50 | Q51 | Q52 | Q53 | Q54 | Q55 | Q56 | Q57 | Q58 | Q59 | Q60 | Q61 | Q62 | Q63 | Q64 | Q65 | Q66 | Q67 | Q68 | Q69 | Q70 | Q71 | Q72 | Q73 | Q74 | Q75 | Q76 | Q77 | Q78 | Q79 | Q80 | Q81 | Q82 | Q83 | Q84 | Q85 | Q86 | Q87 | Q88 | Q89 | Q90 | Q91 | Q92 | Q93 | Q94 | Q95 | Q96 | Q97 | Q98 | Q99 | Q100 |
|----|----|----|----|----|----|----|----|----|-----|-----|-----|-----|-----|-----|-----|-----|-----|-----|-----|-----|-----|-----|-----|-----|-----|-----|-----|-----|-----|-----|-----|-----|-----|-----|-----|-----|-----|-----|-----|-----|-----|-----|-----|-----|-----|-----|-----|-----|-----|-----|-----|-----|-----|-----|-----|-----|-----|-----|-----|-----|-----|-----|-----|-----|-----|-----|-----|-----|-----|-----|-----|-----|-----|-----|-----|-----|-----|-----|-----|-----|-----|-----|-----|-----|-----|-----|-----|-----|-----|-----|-----|-----|-----|-----|-----|-----|-----|-----|------|
| Q1 | Q2 | Q3 | Q4 | Q5 | Q6 | Q7 | Q8 | Q9 | Q10 | Q11 | Q12 | Q13 | Q14 | Q15 | Q16 | Q17 | Q18 | Q19 | Q20 | Q21 | Q22 | Q23 | Q24 | Q25 | Q26 | Q27 | Q28 | Q29 | Q30 | Q31 | Q32 | Q33 | Q34 | Q35 | Q36 | Q37 | Q38 | Q39 | Q40 | Q41 | Q42 | Q43 | Q44 | Q45 | Q46 | Q47 | Q48 | Q49 | Q50 | Q51 | Q52 | Q53 | Q54 | Q55 | Q56 | Q57 | Q58 | Q59 | Q60 | Q61 | Q62 | Q63 | Q64 | Q65 | Q66 | Q67 | Q68 | Q69 | Q70 | Q71 | Q72 | Q73 | Q74 | Q75 | Q76 | Q77 | Q78 | Q79 | Q80 | Q81 | Q82 | Q83 | Q84 | Q85 | Q86 | Q87 | Q88 | Q89 | Q90 | Q91 | Q92 | Q93 | Q94 | Q95 | Q96 | Q97 | Q98 | Q99 | Q100 |











| CF | Series | 2010 | 2011 | 2012 | 2013 | 2014 | 2015 | 2016 | 2017 | 2018 | 2019 | 2020 | 2021 | 2022 | 2023 | 2024 | 2025 | 2026 | 2027 | 2028 | 2029 | 2030 | 2031 | 2032 | 2033 | 2034 | 2035 | 2036 | 2037 | 2038 | 2039 | 2040 | 2041 | 2042 | 2043 | 2044 | 2045 | 2046 | 2047 | 2048 | 2049 | 2050 | 2051 | 2052 | 2053 | 2054 | 2055 | 2056 | 2057 | 2058 | 2059 | 2060 | 2061 | 2062 | 2063 | 2064 | 2065 | 2066 | 2067 | 2068 | 2069 | 2070 | 2071 | 2072 | 2073 | 2074 | 2075 | 2076 | 2077 | 2078 | 2079 | 2080 | 2081 | 2082 | 2083 | 2084 | 2085 | 2086 | 2087 | 2088 | 2089 | 2090 | 2091 | 2092 | 2093 | 2094 | 2095 | 2096 | 2097 | 2098 | 2099 | 2100 |      |      |      |      |      |      |      |      |      |
|----|--------|------|------|------|------|------|------|------|------|------|------|------|------|------|------|------|------|------|------|------|------|------|------|------|------|------|------|------|------|------|------|------|------|------|------|------|------|------|------|------|------|------|------|------|------|------|------|------|------|------|------|------|------|------|------|------|------|------|------|------|------|------|------|------|------|------|------|------|------|------|------|------|------|------|------|------|------|------|------|------|------|------|------|------|------|------|------|------|------|------|------|------|------|------|------|------|------|------|------|------|------|
| CF | Series | 2101 | 2102 | 2103 | 2104 | 2105 | 2106 | 2107 | 2108 | 2109 | 2110 | 2111 | 2112 | 2113 | 2114 | 2115 | 2116 | 2117 | 2118 | 2119 | 2120 | 2121 | 2122 | 2123 | 2124 | 2125 | 2126 | 2127 | 2128 | 2129 | 2130 | 2131 | 2132 | 2133 | 2134 | 2135 | 2136 | 2137 | 2138 | 2139 | 2140 | 2141 | 2142 | 2143 | 2144 | 2145 | 2146 | 2147 | 2148 | 2149 | 2150 | 2151 | 2152 | 2153 | 2154 | 2155 | 2156 | 2157 | 2158 | 2159 | 2160 | 2161 | 2162 | 2163 | 2164 | 2165 | 2166 | 2167 | 2168 | 2169 | 2170 | 2171 | 2172 | 2173 | 2174 | 2175 | 2176 | 2177 | 2178 | 2179 | 2180 | 2181 | 2182 | 2183 | 2184 | 2185 | 2186 | 2187 | 2188 | 2189 | 2190 | 2191 | 2192 | 2193 | 2194 | 2195 | 2196 | 2197 | 2198 | 2199 | 2200 |







| Q1 | Q2 | Q3 | Q4 | Q5 | Q6 | Q7 | Q8 | Q9 | Q10 | Q11 | Q12 | Q13 | Q14 | Q15 | Q16 | Q17 | Q18 | Q19 | Q20 | Q21 | Q22 | Q23 | Q24 | Q25 | Q26 | Q27 | Q28 | Q29 | Q30 | Q31 | Q32 | Q33 | Q34 | Q35 | Q36 | Q37 | Q38 | Q39 | Q40 | Q41 | Q42 | Q43 | Q44 | Q45 | Q46 | Q47 | Q48 | Q49 | Q50 | Q51 | Q52 | Q53 | Q54 | Q55 | Q56 | Q57 | Q58 | Q59 | Q60 | Q61 | Q62 | Q63 | Q64 | Q65 | Q66 | Q67 | Q68 | Q69 | Q70 | Q71 | Q72 | Q73 | Q74 | Q75 | Q76 | Q77 | Q78 | Q79 | Q80 | Q81 | Q82 | Q83 | Q84 | Q85 | Q86 | Q87 | Q88 | Q89 | Q90 | Q91 | Q92 | Q93 | Q94 | Q95 | Q96 | Q97 | Q98 | Q99 | Q100 |
|----|----|----|----|----|----|----|----|----|-----|-----|-----|-----|-----|-----|-----|-----|-----|-----|-----|-----|-----|-----|-----|-----|-----|-----|-----|-----|-----|-----|-----|-----|-----|-----|-----|-----|-----|-----|-----|-----|-----|-----|-----|-----|-----|-----|-----|-----|-----|-----|-----|-----|-----|-----|-----|-----|-----|-----|-----|-----|-----|-----|-----|-----|-----|-----|-----|-----|-----|-----|-----|-----|-----|-----|-----|-----|-----|-----|-----|-----|-----|-----|-----|-----|-----|-----|-----|-----|-----|-----|-----|-----|-----|-----|-----|-----|-----|-----|------|
| Q1 | Q2 | Q3 | Q4 | Q5 | Q6 | Q7 | Q8 | Q9 | Q10 | Q11 | Q12 | Q13 | Q14 | Q15 | Q16 | Q17 | Q18 | Q19 | Q20 | Q21 | Q22 | Q23 | Q24 | Q25 | Q26 | Q27 | Q28 | Q29 | Q30 | Q31 | Q32 | Q33 | Q34 | Q35 | Q36 | Q37 | Q38 | Q39 | Q40 | Q41 | Q42 | Q43 | Q44 | Q45 | Q46 | Q47 | Q48 | Q49 | Q50 | Q51 | Q52 | Q53 | Q54 | Q55 | Q56 | Q57 | Q58 | Q59 | Q60 | Q61 | Q62 | Q63 | Q64 | Q65 | Q66 | Q67 | Q68 | Q69 | Q70 | Q71 | Q72 | Q73 | Q74 | Q75 | Q76 | Q77 | Q78 | Q79 | Q80 | Q81 | Q82 | Q83 | Q84 | Q85 | Q86 | Q87 | Q88 | Q89 | Q90 | Q91 | Q92 | Q93 | Q94 | Q95 | Q96 | Q97 | Q98 | Q99 | Q100 |































| CF | Series | 2010 | 2011 | 2012 | 2013 | 2014 | 2015 | 2016 | 2017 | 2018 | 2019 | 2020 | 2021 | 2022 | 2023 | 2024 | 2025 | 2026 | 2027 | 2028 | 2029 | 2030 | 2031 | 2032 | 2033 | 2034 | 2035 | 2036 | 2037 | 2038 | 2039 | 2040 | 2041 | 2042 | 2043 | 2044 | 2045 | 2046 | 2047 | 2048 | 2049 | 2050 | 2051 | 2052 | 2053 | 2054 | 2055 | 2056 | 2057 | 2058 | 2059 | 2060 | 2061 | 2062 | 2063 | 2064 | 2065 | 2066 | 2067 | 2068 | 2069 | 2070 | 2071 | 2072 | 2073 | 2074 | 2075 | 2076 | 2077 | 2078 | 2079 | 2080 | 2081 | 2082 | 2083 | 2084 | 2085 | 2086 | 2087 | 2088 | 2089 | 2090 | 2091 | 2092 | 2093 | 2094 | 2095 | 2096 | 2097 | 2098 | 2099 | 2100 |
|----|--------|------|------|------|------|------|------|------|------|------|------|------|------|------|------|------|------|------|------|------|------|------|------|------|------|------|------|------|------|------|------|------|------|------|------|------|------|------|------|------|------|------|------|------|------|------|------|------|------|------|------|------|------|------|------|------|------|------|------|------|------|------|------|------|------|------|------|------|------|------|------|------|------|------|------|------|------|------|------|------|------|------|------|------|------|------|------|------|------|------|------|------|
| CF | Series | 2010 | 2011 | 2012 | 2013 | 2014 | 2015 | 2016 | 2017 | 2018 | 2019 | 2020 | 2021 | 2022 | 2023 | 2024 | 2025 | 2026 | 2027 | 2028 | 2029 | 2030 | 2031 | 2032 | 2033 | 2034 | 2035 | 2036 | 2037 | 2038 | 2039 | 2040 | 2041 | 2042 | 2043 | 2044 | 2045 | 2046 | 2047 | 2048 | 2049 | 2050 | 2051 | 2052 | 2053 | 2054 | 2055 | 2056 | 2057 | 2058 | 2059 | 2060 | 2061 | 2062 | 2063 | 2064 | 2065 | 2066 | 2067 | 2068 | 2069 | 2070 | 2071 | 2072 | 2073 | 2074 | 2075 | 2076 | 2077 | 2078 | 2079 | 2080 | 2081 | 2082 | 2083 | 2084 | 2085 | 2086 | 2087 | 2088 | 2089 | 2090 | 2091 | 2092 | 2093 | 2094 | 2095 | 2096 | 2097 | 2098 | 2099 | 2100 |







| GO ID | GO ACCESSION       | GO Term                    | p-value | Count in Selection | % Count in Selection | Count in Total | % Count in Total |
|-------|--------------------|----------------------------|---------|--------------------|----------------------|----------------|------------------|
| 6888  | GO:0009611 GO:0022 | response to wounding       | 0.00    | 14                 | 1.4752371            | 66             | 0.1906027        |
| 9600  | GO:0016491         | oxidoreductase activity    | 0.00    | 81                 | 8.5353               | 1724           | 4.9787736        |
| 3472  | GO:0004866         | endopeptidase inhibitor    | 0.00    | 13                 | 1.369863             | 95             | 0.27435237       |
| 28101 | GO:0061135         | endopeptidase regulator    | 0.00    | 13                 | 1.369863             | 95             | 0.27435237       |
| 8159  | GO:0010951         | negative regulation of e   | 0.00    | 13                 | 1.369863             | 95             | 0.27435237       |
| 26712 | GO:0052548         | regulation of endopepti    | 0.00    | 13                 | 1.369863             | 95             | 0.27435237       |
| 7690  | GO:0010466         | negative regulation of p   | 0.00    | 13                 | 1.369863             | 110            | 0.31767118       |
| 12946 | GO:0030414         | peptidase inhibitor activ  | 0.00    | 13                 | 1.369863             | 110            | 0.31767118       |
| 25636 | GO:0051346         | negative regulation of h   | 0.00    | 13                 | 1.369863             | 110            | 0.31767118       |
| 28100 | GO:0061134         | peptidase regulator act    | 0.00    | 13                 | 1.369863             | 112            | 0.32344702       |
| 26711 | GO:0052547         | regulation of peptidase    | 0.00    | 13                 | 1.369863             | 112            | 0.32344702       |
| 3473  | GO:0004867         | serine-type endopeptid     | 0.00    | 9                  | 0.9483667            | 66             | 0.1906027        |
| 3464  | GO:0004857         | enzyme inhibitor activit   | 0.00    | 14                 | 1.4752371            | 157            | 0.4534034        |
| 22409 | GO:0046906         | tetrapyrrole binding       | 0.00    | 33                 | 3.4773445            | 596            | 1.7212002        |
| 19255 | GO:0042938         | dipeptide transport        | 0.00    | 11                 | 1.1591148            | 105            | 0.3032316        |
| 19253 | GO:0042936         | dipeptide transporter ac   | 0.00    | 11                 | 1.1591148            | 105            | 0.3032316        |
| 26959 | GO:0055114         | oxidation-reduction pro    | 0.00    | 98                 | 10.326659            | 2490           | 7.1909204        |
| 4641  | GO:0006508         | proteolysis                | 0.00    | 46                 | 4.8472075            | 965            | 2.7868426        |
| 9396  | GO:0016168         | chlorophyll binding        | 0.00    | 7                  | 0.73761857           | 46             | 0.13284431       |
| 2896  | GO:0004090         | carbonyl reductase (NA     | 0.00    | 4                  | 0.4214963            | 13             | 0.037542958      |
| 19393 | GO:0043086         | negative regulation of c   | 0.00    | 14                 | 1.4752371            | 188            | 0.54292893       |
| 20342 | GO:0044092         | negative regulation of n   | 0.00    | 14                 | 1.4752371            | 188            | 0.54292893       |
| 9813  | GO:0016759         | cellulose synthase activ   | 0.00    | 7                  | 0.73761857           | 57             | 0.16461143       |
| 9768  | GO:0016706         | oxidoreductase activity    | 0.00    | 13                 | 1.369863             | 175            | 0.505386         |
| 8607  | GO:0015197 GO:0015 | peptide transporter acti   | 0.00    | 11                 | 1.1591148            | 139            | 0.40142086       |
| 8608  | GO:0015198         | oligopeptide transport     | 0.00    | 11                 | 1.1591148            | 139            | 0.40142086       |
| 4944  | GO:0006857         | oligopeptide transport     | 0.00    | 11                 | 1.1591148            | 141            | 0.4071967        |
| 9099  | GO:0015833         | peptide transport          | 0.00    | 11                 | 1.1591148            | 141            | 0.4071967        |
| 9784  | GO:0016723         | oxidoreductase activity    | 0.00    | 4                  | 0.4214963            | 20             | 0.0577584        |
| 225   | GO:0000293         | ferric-chelate reductase   | 0.00    | 4                  | 0.4214963            | 20             | 0.0577584        |
| 9266  | GO:0016020         | membrane                   | 0.00    | 131                | 13.804005            | 3741           | 10.803708        |
| 28364 | GO:0065007         | biological regulation      | 0.00    | 150                | 15.806111            | 4376           | 12.637537        |
| 15570 | GO:0033170         | protein-DNA loading AT     | 0.00    | 2                  | 0.21074815           | 3              | 0.00866376       |
| 2635  | GO:0003689         | DNA clamp loader activ     | 0.00    | 2                  | 0.21074815           | 3              | 0.00866376       |
| 8489  | GO:0015066         | alpha-amylase inhibitor    | 0.00    | 4                  | 0.4214963            | 22             | 0.06353424       |
| 3307  | GO:0004675         | transmembrane recept       | 0.00    | 20                 | 2.1074815            | 367            | 1.0598665        |
| 25626 | GO:0051336         | regulation of hydrolase    | 0.00    | 13                 | 1.369863             | 196            | 0.5660323        |
| 9808  | GO:0016754         | sinapoylglucose-malate     | 0.00    | 4                  | 0.4214963            | 23             | 0.06642216       |
| 9807  | GO:0016753         | O-sinapoyltransferase a    | 0.00    | 4                  | 0.4214963            | 23             | 0.06642216       |
| 9806  | GO:0016752         | sinapoyltransferase act    | 0.00    | 4                  | 0.4214963            | 23             | 0.06642216       |
| 5702  | GO:0008146         | sulfotransferase activity  | 0.00    | 6                  | 0.63224447           | 54             | 0.15594767       |
| 6826  | GO:0009538         | photosystem I reaction     | 0.00    | 3                  | 0.31612223           | 12             | 0.03465504       |
| 25094 | GO:0050789 GO:0050 | regulation of biological   | 0.00    | 146                | 15.384615            | 4315           | 12.461374        |
| 5729  | GO:0008191         | metalloendopeptidase i     | 0.00    | 2                  | 0.21074815           | 4              | 0.011551679      |
| 23942 | GO:0048551         | metalloenzyme inhibitor    | 0.00    | 2                  | 0.21074815           | 4              | 0.011551679      |
| 7792  | GO:0010576         | metalloenzyme regulator    | 0.00    | 2                  | 0.21074815           | 4              | 0.011551679      |
| 9718  | GO:0016636         | oxidoreductase activity    | 0.00    | 2                  | 0.21074815           | 4              | 0.011551679      |
| 11931 | GO:0020037         | heme binding               | 0.01    | 26                 | 2.739726             | 550            | 1.5883559        |
| 6809  | GO:0009521 GO:0030 | photosystem                | 0.01    | 4                  | 0.4214963            | 28             | 0.080861755      |
| 6940  | GO:0009672         | auxin:hydrogen sympor      | 0.01    | 4                  | 0.4214963            | 28             | 0.080861755      |
| 18502 | GO:0042132         | fructose 1,6-bisphosph     | 0.01    | 2                  | 0.21074815           | 5              | 0.0144396        |
| 6810  | GO:0009522         | photosystem I              | 0.01    | 3                  | 0.31612223           | 15             | 0.043318797      |
| 2868  | GO:0004062         | aryl sulfotransferase ac   | 0.01    | 3                  | 0.31612223           | 15             | 0.043318797      |
| 3872  | GO:0005506         | iron ion binding           | 0.01    | 26                 | 2.739726             | 563            | 1.6258988        |
| 31431 | GO:0080054         | low affinity nitrate trans | 0.01    | 5                  | 0.52687037           | 45             | 0.1299564        |
| 22049 | GO:0046527         | glucosyltransferase act    | 0.01    | 15                 | 1.5806112            | 270            | 0.77973837       |
| 3065  | GO:0004382         | guanosine-diphosphata      | 0.01    | 2                  | 0.21074815           | 6              | 0.01732752       |
| 21331 | GO:0045735         | nutrient reservoir activit | 0.01    | 7                  | 0.73761857           | 89             | 0.25702485       |
| 11776 | GO:0019825         | oxygen binding             | 0.01    | 19                 | 2.0021074            | 389            | 1.1234008        |
| 9783  | GO:0016722         | oxidoreductase activity    | 0.01    | 5                  | 0.52687037           | 50             | 0.14439599       |
| 20630 | GO:0044436         | thylakoid part             | 0.01    | 7                  | 0.73761857           | 90             | 0.2599128        |
| 5792  | GO:0008271         | secondary active sulfat    | 0.01    | 3                  | 0.31612223           | 18             | 0.051982556      |
| 8736  | GO:0015381         | high affinity sulfate tran | 0.01    | 3                  | 0.31612223           | 18             | 0.051982556      |
| 25098 | GO:0050794 GO:0051 | regulation of cellular pro | 0.01    | 132                | 13.909378            | 3987           | 11.514136        |
| 9933  | GO:0016903         | oxidoreductase activity    | 0.01    | 8                  | 0.8429926            | 113            | 0.32633495       |
| 6863  | GO:0009579         | thylakoid                  | 0.01    | 7                  | 0.73761857           | 94             | 0.27146447       |
| 9832  | GO:0016782         | transferase activity, tran | 0.02    | 6                  | 0.63224447           | 74             | 0.21370606       |
| 6201  | GO:0008794         | arsenate reductase (glu    | 0.02    | 3                  | 0.31612223           | 20             | 0.0577584        |
| 13086 | GO:0030611         | arsenate reductase act     | 0.02    | 3                  | 0.31612223           | 20             | 0.0577584        |
| 13088 | GO:0030613         | oxidoreductase activity    | 0.02    | 3                  | 0.31612223           | 20             | 0.0577584        |
| 13089 | GO:0030614         | oxidoreductase activity    | 0.02    | 3                  | 0.31612223           | 20             | 0.0577584        |
| 10057 | GO:0017110         | nucleoside-diphosphata     | 0.02    | 2                  | 0.21074815           | 8              | 0.023103358      |
| 11202 | GO:0019199         | transmembrane recept       | 0.02    | 22                 | 2.3182297            | 504            | 1.4555116        |
| 8967  | GO:0015698         | inorganic anion transpo    | 0.02    | 10                 | 1.0537407            | 176            | 0.5082739        |
| 9769  | GO:0016707         | gibberellin 3-beta-dioxy   | 0.02    | 2                  | 0.21074815           | 9              | 0.025991278      |
| 24627 | GO:0050308         | sugar-phosphatase act      | 0.02    | 2                  | 0.21074815           | 9              | 0.025991278      |
| 8526  | GO:0015112         | nitrate transmembrane      | 0.03    | 5                  | 0.52687037           | 61             | 0.1761631        |
| 8975  | GO:0015706 GO:0006 | nitrate transport          | 0.03    | 5                  | 0.52687037           | 61             | 0.1761631        |
| 8517  | GO:0015103         | inorganic anion transme    | 0.03    | 9                  | 0.9483667            | 154            | 0.44473964       |
| 16738 | GO:0034357         | photosynthetic membra      | 0.03    | 6                  | 0.63224447           | 83             | 0.23969735       |
| 28365 | GO:0065008         | regulation of biological   | 0.03    | 15                 | 1.5806112            | 316            | 0.9125827        |
| 8651  | GO:0015248         | sterol transporter activit | 0.03    | 2                  | 0.21074815           | 10             | 0.0288792        |
| 9178  | GO:0015918         | sterol transport           | 0.03    | 2                  | 0.21074815           | 10             | 0.0288792        |
| 10072 | GO:0017127         | cholesterol transporter    | 0.03    | 2                  | 0.21074815           | 10             | 0.0288792        |
| 12859 | GO:0030301         | cholesterol transport      | 0.03    | 2                  | 0.21074815           | 10             | 0.0288792        |
| 26022 | GO:0051740         | ethylene binding           | 0.03    | 2                  | 0.21074815           | 10             | 0.0288792        |
| 30687 | GO:0072328         | alkene binding             | 0.03    | 2                  | 0.21074815           | 10             | 0.0288792        |
| 21145 | GO:0045543         | gibberellin 2-beta-dioxy   | 0.03    | 3                  | 0.31612223           | 25             | 0.072197996      |
| 21058 | GO:0045454 GO:0030 | cell redox homeostasis     | 0.03    | 11                 | 1.1591148            | 211            | 0.6093511        |
| 5704  | GO:0008150 GO:0000 | biological process         | 0.03    | 636                | 67.017914            | 22215          | 64.155136        |
| 8673  | GO:0015291 GO:0015 | secondary active transp    | 0.03    | 18                 | 1.8967334            | 407            | 1.1753833        |
| 8530  | GO:0015116         | sulfate transmembrane      | 0.03    | 3                  | 0.31612223           | 26             | 0.075085916      |
| 9765  | GO:0016702         | oxidoreductase activity    | 0.03    | 5                  | 0.52687037           | 66             | 0.1906027        |
| 12574 | GO:0022892         | substrate-specific trans   | 0.03    | 52                 | 5.479452             | 1463           | 4.2250266        |
| 4329  | GO:0006096 GO:0019 | glycolysis                 | 0.04    | 4                  | 0.4214963            | 46             | 0.13284431       |
| 5981  | GO:0008509         | anion transmembrane t      | 0.04    | 12                 | 1.2644889            | 245            | 0.70754033       |
| 9767  | GO:0016705         | oxidoreductase activity    | 0.04    | 15                 | 1.5806112            | 329            | 0.95012563       |



|       |                        |                            |      |     |             |      |             |
|-------|------------------------|----------------------------|------|-----|-------------|------|-------------|
| 22415 | GO:0046914             | transition metal ion bind  | 0.04 | 86  | 9.062171    | 2599 | 7.5057034   |
| 5793  | GO:0008272(GO:0006820) | sulfate transport          | 0.04 | 3   | 0.31612223  | 28   | 0.080861755 |
| 4917  | GO:0006820(GO:0006820) | anion transport            | 0.04 | 12  | 1.2644889   | 247  | 0.7133162   |
| 3386  | GO:0004773             | steryl-sulfatase activity  | 0.04 | 2   | 0.21074815  | 12   | 0.03465504  |
| 3397  | GO:0004784(GO:0004784) | superoxide dismutase a     | 0.04 | 2   | 0.21074815  | 12   | 0.03465504  |
| 5965  | GO:0008484             | sulfuric ester hydrolase   | 0.04 | 2   | 0.21074815  | 12   | 0.03465504  |
| 9704  | GO:0016621             | cinnamoyl-CoA reducta      | 0.04 | 2   | 0.21074815  | 12   | 0.03465504  |
| 9782  | GO:0016721             | oxidoreductase activity    | 0.04 | 2   | 0.21074815  | 12   | 0.03465504  |
| 3490  | GO:0004888(GO:0004888) | transmembrane recept       | 0.04 | 23  | 2.4236038   | 571  | 1.6490022   |
| 7074  | GO:0009815             | 1-aminocyclopropane-1      | 0.04 | 4   | 0.4214963   | 49   | 0.14150807  |
| 2986  | GO:0004252             | serine-type endopeptid     | 0.05 | 8   | 0.8429926   | 144  | 0.41586044  |
| 9764  | GO:0016701             | oxidoreductase activity    | 0.05 | 5   | 0.52687037  | 72   | 0.20793022  |
| 7166  | GO:0009914             | hormone transport          | 0.05 | 4   | 0.4214963   | 50   | 0.14439599  |
| 27891 | GO:0060918             | auxin transport            | 0.05 | 4   | 0.4214963   | 50   | 0.14439599  |
| 31536 | GO:0080161             | auxin transmembrane t      | 0.05 | 4   | 0.4214963   | 50   | 0.14439599  |
| 2870  | GO:0004064             | arylesterase activity      | 0.05 | 3   | 0.31612223  | 30   | 0.086637594 |
| 3013  | GO:0004328(GO:0034328) | formamidase activity       | 0.05 | 1   | 0.105374075 | 2    | 0.00577584  |
| 3152  | GO:0004493             | methylmalonyl-CoA epi      | 0.05 | 1   | 0.105374075 | 2    | 0.00577584  |
| 3604  | GO:0005031(GO:0005031) | tumor necrosis factor re   | 0.05 | 1   | 0.105374075 | 2    | 0.00577584  |
| 3606  | GO:0005035             | death receptor activity    | 0.05 | 1   | 0.105374075 | 2    | 0.00577584  |
| 5907  | GO:0008413             | 8-oxo-7,8-dihydroquano     | 0.05 | 1   | 0.105374075 | 2    | 0.00577584  |
| 6790  | GO:0009496             | plastoquinol-plastocyan    | 0.05 | 1   | 0.105374075 | 2    | 0.00577584  |
| 6828  | GO:0009540             | zeaxanthin epoxidase l     | 0.05 | 1   | 0.105374075 | 2    | 0.00577584  |
| 8612  | GO:0015204(GO:0015204) | urea transmembrane tr      | 0.05 | 1   | 0.105374075 | 2    | 0.00577584  |
| 9106  | GO:0015840             | urea transport             | 0.05 | 1   | 0.105374075 | 2    | 0.00577584  |
| 11186 | GO:0019177             | dihydroneopterin tripho    | 0.05 | 1   | 0.105374075 | 2    | 0.00577584  |
| 11223 | GO:0019221             | cytokine-mediated sign     | 0.05 | 1   | 0.105374075 | 2    | 0.00577584  |
| 11870 | GO:0019955(GO:0019955) | cytokine binding           | 0.05 | 1   | 0.105374075 | 2    | 0.00577584  |
| 14849 | GO:0032441             | pheophorbide a oxygen      | 0.05 | 1   | 0.105374075 | 2    | 0.00577584  |
| 15608 | GO:0033209             | tumor necrosis factor-r    | 0.05 | 1   | 0.105374075 | 2    | 0.00577584  |
| 16481 | GO:0034097             | response to cytokine st    | 0.05 | 1   | 0.105374075 | 2    | 0.00577584  |
| 16991 | GO:0034612             | response to tumor necr     | 0.05 | 1   | 0.105374075 | 2    | 0.00577584  |
| 18651 | GO:0042300             | beta-amylin synthase a     | 0.05 | 1   | 0.105374075 | 2    | 0.00577584  |
| 19204 | GO:0042887             | amide transmembrane b      | 0.05 | 1   | 0.105374075 | 2    | 0.00577584  |
| 19424 | GO:0043120             | tumor necrosis factor b    | 0.05 | 1   | 0.105374075 | 2    | 0.00577584  |
| 21947 | GO:0046422             | violaxanthin de-epoxida    | 0.05 | 1   | 0.105374075 | 2    | 0.00577584  |
| 22490 | GO:0046995             | oxidoreductase activity    | 0.05 | 1   | 0.105374075 | 2    | 0.00577584  |
| 24561 | GO:0050242             | pyruvate, phosphate dif    | 0.05 | 1   | 0.105374075 | 2    | 0.00577584  |
| 24767 | GO:0050454             | coenzyme F420 hydroc       | 0.05 | 1   | 0.105374075 | 2    | 0.00577584  |
| 24925 | GO:0050619             | phytochromobilin:ferred    | 0.05 | 1   | 0.105374075 | 2    | 0.00577584  |
| 24931 | GO:0050625(GO:0018252) | 2-hydroxy-1,4-benzozqu     | 0.05 | 1   | 0.105374075 | 2    | 0.00577584  |
| 26025 | GO:0051743             | red chlorophyll cataboli   | 0.05 | 1   | 0.105374075 | 2    | 0.00577584  |
| 29709 | GO:0071345             | cellular response to cyt   | 0.05 | 1   | 0.105374075 | 2    | 0.00577584  |
| 29720 | GO:0071356             | cellular response to tum   | 0.05 | 1   | 0.105374075 | 2    | 0.00577584  |
| 30280 | GO:0071918             | urea transmembrane tr      | 0.05 | 1   | 0.105374075 | 2    | 0.00577584  |
| 2748  | GO:0003913             | DNA photolyase activity    | 0.05 | 1   | 0.105374075 | 2    | 0.00577584  |
| 11224 | GO:0019222             | regulation of metabolic    | 0.05 | 100 | 10.537408   | 3115 | 8.995871    |
| 7413  | GO:0010181             | FMN binding                | 0.05 | 2   | 0.21074815  | 14   | 0.040430877 |
| 25510 | GO:0051213             | dioxygenase activity       | 0.06 | 5   | 0.52687037  | 75   | 0.21659398  |
| 9750  | GO:0016679             | oxidoreductase activity    | 0.06 | 4   | 0.4214963   | 53   | 0.15305975  |
| 11695 | GO:0019725             | cellular homeostasis       | 0.06 | 11  | 1.1591148   | 234  | 0.67577326  |
| 25195 | GO:0050896(GO:0051896) | response to stimulus       | 0.06 | 63  | 6.638567    | 1881 | 5.432177    |
| 4530  | GO:0006355(GO:0032422) | regulation of transcripti  | 0.06 | 84  | 8.851422    | 2591 | 7.4826      |
| 12650 | GO:0030060             | L-malate dehydrogenas      | 0.06 | 2   | 0.21074815  | 15   | 0.043318797 |
| 25544 | GO:0051252             | regulation of RNA meta     | 0.06 | 84  | 8.851422    | 2593 | 7.488376    |
| 18925 | GO:0042592             | homeostatic process        | 0.06 | 11  | 1.1591148   | 238  | 0.68732494  |
| 7692  | GO:0010468             | regulation of gene expr    | 0.07 | 85  | 8.956797    | 2635 | 7.6096687   |
| 12516 | GO:0022804             | active transmembrane       | 0.07 | 29  | 3.0558484   | 787  | 2.2727928   |
| 7141  | GO:0009889             | regulation of biosynthe    | 0.07 | 84  | 8.851422    | 2605 | 7.523031    |
| 7772  | GO:0010556             | regulation of macromol     | 0.07 | 84  | 8.851422    | 2605 | 7.523031    |
| 13756 | GO:0031326             | regulation of cellular bid | 0.07 | 84  | 8.851422    | 2605 | 7.523031    |
| 32213 | GO:2000112             | regulation of cellular ma  | 0.07 | 84  | 8.851422    | 2605 | 7.523031    |
| 3742  | GO:0005242             | inward rectifier potassi   | 0.07 | 2   | 0.21074815  | 16   | 0.046206716 |
| 3829  | GO:0005381(GO:0005381) | iron ion transmembrane     | 0.07 | 2   | 0.21074815  | 16   | 0.046206716 |
| 7178  | GO:0009927             | histidine phosphotransf    | 0.07 | 2   | 0.21074815  | 16   | 0.046206716 |
| 17134 | GO:0034755             | iron ion transmembrane     | 0.07 | 2   | 0.21074815  | 16   | 0.046206716 |
| 11206 | GO:0019203             | carbohydrate phosphat      | 0.07 | 3   | 0.31612223  | 35   | 0.10107719  |
| 22375 | GO:0046872             | metal ion binding          | 0.07 | 95  | 10.010537   | 2985 | 8.6204405   |
| 5766  | GO:0008236             | serine-type peptidase a    | 0.07 | 10  | 1.0537407   | 214  | 0.6180149   |
| 8028  | GO:0010817             | regulation of hormone li   | 0.07 | 4   | 0.4214963   | 58   | 0.16749935  |
| 8494  | GO:0015075             | ion transmembrane tra      | 0.07 | 30  | 3.1612225   | 827  | 2.3883097   |
| 9393  | GO:0016165             | lipoxygenase activity      | 0.08 | 3   | 0.31612223  | 36   | 0.10396511  |
| 19470 | GO:0043167             | ion binding                | 0.08 | 95  | 10.010537   | 2997 | 8.655096    |
| 19472 | GO:0043169             | cation binding             | 0.08 | 95  | 10.010537   | 2997 | 8.655096    |
| 4910  | GO:0006811             | ion transport              | 0.08 | 34  | 3.5827186   | 959  | 2.769515    |
| 27228 | GO:0060255             | regulation of macromol     | 0.08 | 85  | 8.956797    | 2660 | 7.6818666   |
| 5018  | GO:0006950             | response to stress         | 0.08 | 23  | 2.4236038   | 611  | 1.764519    |
| 3405  | GO:0004794             | L-threonine ammonia-ly     | 0.08 | 1   | 0.105374075 | 3    | 0.00866376  |
| 16603 | GO:0034220             | ion transmembrane tra      | 0.08 | 30  | 3.1612225   | 833  | 2.4056373   |
| 4327  | GO:0006091             | generation of precursor    | 0.08 | 5   | 0.52687037  | 84   | 0.24258527  |
| 10103 | GO:0017171             | serine hydrolase activi    | 0.08 | 10  | 1.0537407   | 220  | 0.6354236   |
| 2981  | GO:0004190             | aspartic-type endopept     | 0.09 | 2   | 0.21074815  | 18   | 0.051982556 |
| 6450  | GO:0009081             | branched chain family a    | 0.09 | 2   | 0.21074815  | 18   | 0.051982556 |
| 10899 | GO:0018858             | benzoate-CoA ligase a      | 0.09 | 2   | 0.21074815  | 18   | 0.051982556 |
| 22917 | GO:0047429             | nucleoside-triphosphate    | 0.09 | 2   | 0.21074815  | 18   | 0.051982556 |
| 28368 | GO:0070001             | aspartic-type peptidase    | 0.09 | 2   | 0.21074815  | 18   | 0.051982556 |
| 9267  | GO:0016021             | integral to membrane       | 0.09 | 38  | 4.004215    | 1103 | 3.1853757   |
| 9812  | GO:0016758             | transferase activity, tran | 0.10 | 19  | 2.0021074   | 501  | 1.4468478   |
| 3475  | GO:0004871(GO:0005035) | signal transducer activi   | 0.10 | 28  | 2.9504743   | 787  | 2.2727928   |
| 27063 | GO:0060089             | molecular transducer a     | 0.10 | 28  | 2.9504743   | 787  | 2.2727928   |
| 4921  | GO:0006826(GO:0015204) | iron ion transport         | 0.10 | 2   | 0.21074815  | 20   | 0.0577584   |
| 9706  | GO:0016623             | oxidoreductase activity    | 0.10 | 2   | 0.21074815  | 20   | 0.0577584   |
| 9707  | GO:0016624             | oxidoreductase activity    | 0.10 | 2   | 0.21074815  | 20   | 0.0577584   |
| 24482 | GO:0050162             | oxalate oxidase activity   | 0.10 | 2   | 0.21074815  | 20   | 0.0577584   |
| 2900  | GO:0004096(GO:0016922) | catalase activity          | 0.11 | 1   | 0.105374075 | 4    | 0.011551679 |
| 2953  | GO:0004151             | dihydroorotate activity    | 0.11 | 1   | 0.105374075 | 4    | 0.011551679 |
| 3033  | GO:0004349             | glutamate 5-kinase acti    | 0.11 | 1   | 0.105374075 | 4    | 0.011551679 |
| 3057  | GO:0004373             | glycogen (starch) synth    | 0.11 | 1   | 0.105374075 | 4    | 0.011551679 |
| 3101  | GO:0004435             | phosphatidylinositol ph    | 0.11 | 1   | 0.105374075 | 4    | 0.011551679 |
| 4039  | GO:0005751(GO:0005751) | mitochondrial respirato    | 0.11 | 1   | 0.105374075 | 4    | 0.011551679 |
| 5942  | GO:0008456             | alpha-N-acetylgalactos     | 0.11 | 1   | 0.105374075 | 4    | 0.011551679 |



|       |                    |                            |      |    |             |      |             |
|-------|--------------------|----------------------------|------|----|-------------|------|-------------|
| 6350  | GO:0008965         | phosphoenolpyruvate-d      | 0.11 | 1  | 0.105374075 | 4    | 0.011551679 |
| 7170  | GO:0009918         | sterol delta7 reductase    | 0.11 | 1  | 0.105374075 | 4    | 0.011551679 |
| 7406  | GO:0010174         | nucleoside transmembr      | 0.11 | 1  | 0.105374075 | 4    | 0.011551679 |
| 7534  | GO:0010309         | acireductone dioxigena     | 0.11 | 1  | 0.105374075 | 4    | 0.011551679 |
| 8459  | GO:0015018         | galactosylgalactosylkil    | 0.11 | 1  | 0.105374075 | 4    | 0.011551679 |
| 8594  | GO:0015184         | L-cystine transmembra      | 0.11 | 1  | 0.105374075 | 4    | 0.011551679 |
| 8885  | GO:0015603         | iron chelate transmemb     | 0.11 | 1  | 0.105374075 | 4    | 0.011551679 |
| 8902  | GO:0015623(GO:0015 | iron-chelate-transportin   | 0.11 | 1  | 0.105374075 | 4    | 0.011551679 |
| 8957  | GO:0015688         | iron chelate transport     | 0.11 | 1  | 0.105374075 | 4    | 0.011551679 |
| 9080  | GO:0015811         | L-cystine transport        | 0.11 | 1  | 0.105374075 | 4    | 0.011551679 |
| 9351  | GO:0016119         | carotene metabolic pro     | 0.11 | 1  | 0.105374075 | 4    | 0.011551679 |
| 9352  | GO:0016120         | carotene biosynthetic p    | 0.11 | 1  | 0.105374075 | 4    | 0.011551679 |
| 9760  | GO:0016695         | oxidoreductase activity    | 0.11 | 1  | 0.105374075 | 4    | 0.011551679 |
| 9790  | GO:0016730         | oxidoreductase activity    | 0.11 | 1  | 0.105374075 | 4    | 0.011551679 |
| 9810  | GO:0016756(GO:0042 | glutathione gamma-glu      | 0.11 | 1  | 0.105374075 | 4    | 0.011551679 |
| 9819  | GO:0016767         | geranylgeranyl-diphosp     | 0.11 | 1  | 0.105374075 | 4    | 0.011551679 |
| 10039 | GO:0017084         | delta1-pyrroline-5-carbo   | 0.11 | 1  | 0.105374075 | 4    | 0.011551679 |
| 11549 | GO:0019566         | arabinose metabolic pr     | 0.11 | 1  | 0.105374075 | 4    | 0.011551679 |
| 16639 | GO:0034256         | chlorophyll(ide) b reduc   | 0.11 | 1  | 0.105374075 | 4    | 0.011551679 |
| 18575 | GO:0042214         | terpene metabolic proc     | 0.11 | 1  | 0.105374075 | 4    | 0.011551679 |
| 20901 | GO:0045277(GO:0045 | respiratory chain compl    | 0.11 | 1  | 0.105374075 | 4    | 0.011551679 |
| 21791 | GO:0046246         | terpene biosynthetic pr    | 0.11 | 1  | 0.105374075 | 4    | 0.011551679 |
| 21902 | GO:0046373         | L-arabinose metabolic p    | 0.11 | 1  | 0.105374075 | 4    | 0.011551679 |
| 22408 | GO:0046905         | phytoene synthase acti     | 0.11 | 1  | 0.105374075 | 4    | 0.011551679 |
| 23084 | GO:0047598         | 7-dehydrocholesterol re    | 0.11 | 1  | 0.105374075 | 4    | 0.011551679 |
| 24646 | GO:0050327         | testosterone 17-beta-d     | 0.11 | 1  | 0.105374075 | 4    | 0.011551679 |
| 31507 | GO:0080132         | fatty acid alpha-hydroxy   | 0.11 | 1  | 0.105374075 | 4    | 0.011551679 |
| 75    | GO:0000099         | sulfur amino acid trans    | 0.11 | 1  | 0.105374075 | 4    | 0.011551679 |
| 77    | GO:0000101         | sulfur amino acid trans    | 0.11 | 1  | 0.105374075 | 4    | 0.011551679 |
| 11221 | GO:0019219         | regulation of nucleobas    | 0.11 | 84 | 8.851422    | 2675 | 7.7251854   |
| 25468 | GO:0051171         | regulation of nitrogen c   | 0.11 | 84 | 8.851422    | 2675 | 7.7251854   |
| 8461  | GO:0015020(GO:0003 | glucuronosyltransferase    | 0.11 | 3  | 0.31612223  | 42   | 0.121292636 |
| 9698  | GO:0016615         | malate dehydrogenase       | 0.11 | 2  | 0.21074815  | 21   | 0.060646318 |
| 3476  | GO:0004872(GO:0019 | receptor activity          | 0.12 | 24 | 2.5289779   | 672  | 1.9406822   |
| 9699  | GO:0016616         | oxidoreductase activity    | 0.12 | 11 | 1.1591148   | 266  | 0.7681867   |
| 9753  | GO:0016682         | oxidoreductase activity    | 0.12 | 3  | 0.31612223  | 44   | 0.12706847  |
| 9722  | GO:0016641         | oxidoreductase activity    | 0.12 | 4  | 0.4214963   | 69   | 0.19926646  |
| 8679  | GO:0015297         | antiporter activity        | 0.13 | 7  | 0.73761857  | 152  | 0.4389638   |
| 8682  | GO:0015300         | solute:solute antiporter   | 0.13 | 7  | 0.73761857  | 152  | 0.4389638   |
| 12573 | GO:0022891         | substrate-specific trans   | 0.13 | 41 | 4.3203373   | 1241 | 3.5839086   |
| 4678  | GO:0006549         | isoleucine metabolic pr    | 0.13 | 1  | 0.105374075 | 5    | 0.0144396   |
| 6465  | GO:0009097         | isoleucine biosynthetic    | 0.13 | 1  | 0.105374075 | 5    | 0.0144396   |
| 21949 | GO:0046424         | ferulate 5-hydroxylase a   | 0.13 | 1  | 0.105374075 | 5    | 0.0144396   |
| 31465 | GO:0080090         | regulation of primary m    | 0.13 | 84 | 8.851422    | 2710 | 7.826263    |
| 7527  | GO:0010302         | 2-oxoglutarate-depend      | 0.13 | 2  | 0.21074815  | 23   | 0.06642216  |
| 3744  | GO:0005244         | voltage-gated ion chan     | 0.14 | 4  | 0.4214963   | 72   | 0.20793022  |
| 12528 | GO:0022832         | voltage-gated channel      | 0.14 | 4  | 0.4214963   | 72   | 0.20793022  |
| 15280 | GO:0032879         | regulation of localizat    | 0.14 | 4  | 0.4214963   | 72   | 0.20793022  |
| 17141 | GO:0034762         | regulation of transmem     | 0.14 | 4  | 0.4214963   | 72   | 0.20793022  |
| 17144 | GO:0034765         | regulation of ion trans    | 0.14 | 4  | 0.4214963   | 72   | 0.20793022  |
| 19568 | GO:0043269         | regulation of ion trans    | 0.14 | 4  | 0.4214963   | 72   | 0.20793022  |
| 25348 | GO:0051049         | regulation of transport    | 0.14 | 4  | 0.4214963   | 72   | 0.20793022  |
| 8493  | GO:0015074         | DNA integration            | 0.14 | 3  | 0.31612223  | 47   | 0.13573223  |
| 4247  | GO:0006007         | glucose catabolic proce    | 0.14 | 4  | 0.4214963   | 73   | 0.21081814  |
| 9703  | GO:0016620         | oxidoreductase activity    | 0.14 | 4  | 0.4214963   | 73   | 0.21081814  |
| 11313 | GO:0019320         | hexose catabolic proce     | 0.14 | 4  | 0.4214963   | 73   | 0.21081814  |
| 20525 | GO:0044275         | cellular carbohydrate ca   | 0.14 | 4  | 0.4214963   | 73   | 0.21081814  |
| 21726 | GO:0046164         | alcohol catabolic proce    | 0.14 | 4  | 0.4214963   | 73   | 0.21081814  |
| 21894 | GO:0046365         | monosaccharide catabo      | 0.14 | 4  | 0.4214963   | 73   | 0.21081814  |
| 2976  | GO:0004176(GO:0004 | ATP-dependent peptida      | 0.14 | 3  | 0.31612223  | 48   | 0.13862015  |
| 12794 | GO:0030234         | enzyme regulator activi    | 0.14 | 15 | 1.5806112   | 403  | 1.1638317   |
| 13656 | GO:0031224         | intrinsic to membrane      | 0.15 | 39 | 4.109589    | 1193 | 3.4452884   |
| 13753 | GO:0031323         | regulation of cellular me  | 0.15 | 85 | 8.956797    | 2770 | 7.999538    |
| 973   | GO:0001653         | peptide receptor activi    | 0.15 | 2  | 0.21074815  | 25   | 0.072197996 |
| 12608 | GO:0030001         | metal ion transport        | 0.15 | 14 | 1.4752371   | 374  | 1.080082    |
| 8810  | GO:0015491         | cation:cation antiporter   | 0.15 | 4  | 0.4214963   | 75   | 0.21659398  |
| 3183  | GO:0004525         | ribonuclease III activity  | 0.15 | 1  | 0.105374075 | 6    | 0.01732752  |
| 3413  | GO:0004802         | transketolase activity     | 0.15 | 1  | 0.105374075 | 6    | 0.01732752  |
| 3845  | GO:0005452         | inorganic anion exchan     | 0.15 | 1  | 0.105374075 | 6    | 0.01732752  |
| 5810  | GO:0008290         | F-actin capping protein    | 0.15 | 1  | 0.105374075 | 6    | 0.01732752  |
| 7250  | GO:0010012         | steroid 22-alpha hydrox    | 0.15 | 1  | 0.105374075 | 6    | 0.01732752  |
| 9825  | GO:0016774         | phosphotransferase ac      | 0.15 | 1  | 0.105374075 | 6    | 0.01732752  |
| 9831  | GO:0016781         | phosphotransferase ac      | 0.15 | 1  | 0.105374075 | 6    | 0.01732752  |
| 12826 | GO:0030267         | glyoxylate reductase (N    | 0.15 | 1  | 0.105374075 | 6    | 0.01732752  |
| 13832 | GO:0031409         | pigment binding            | 0.15 | 1  | 0.105374075 | 6    | 0.01732752  |
| 13982 | GO:0031559         | oxidosqualene cyclase      | 0.15 | 1  | 0.105374075 | 6    | 0.01732752  |
| 14264 | GO:0031849         | olfactory receptor bindi   | 0.15 | 1  | 0.105374075 | 6    | 0.01732752  |
| 19203 | GO:0042886         | amide transport            | 0.15 | 1  | 0.105374075 | 6    | 0.01732752  |
| 23230 | GO:0047746         | chlorophyllase activity    | 0.15 | 1  | 0.105374075 | 6    | 0.01732752  |
| 30707 | GO:0072348         | sulfur compound trans      | 0.15 | 1  | 0.105374075 | 6    | 0.01732752  |
| 2713  | GO:0003863         | 3-methyl-2-oxobutanoa      | 0.15 | 1  | 0.105374075 | 6    | 0.01732752  |
| 2846  | GO:0004038         | allantoinase activity      | 0.15 | 1  | 0.105374075 | 6    | 0.01732752  |
| 9709  | GO:0016627         | oxidoreductase activity    | 0.16 | 5  | 0.52687037  | 104  | 0.30034366  |
| 9744  | GO:0016671         | oxidoreductase activity    | 0.16 | 2  | 0.21074815  | 26   | 0.075085916 |
| 126   | GO:0000160         | two-component signal t     | 0.16 | 2  | 0.21074815  | 26   | 0.075085916 |
| 8919  | GO:0015645         | fatty acid liqase activity | 0.17 | 2  | 0.21074815  | 27   | 0.077973835 |
| 2975  | GO:0004175(GO:0016 | endopeptidase activity     | 0.17 | 12 | 1.2644889   | 320  | 0.9241344   |
| 4909  | GO:0006810(GO:0015 | transport                  | 0.18 | 71 | 7.4815598   | 2315 | 6.6855345   |
| 25529 | GO:0051234         | establishment of localiz   | 0.18 | 71 | 7.4815598   | 2315 | 6.6855345   |
| 5732  | GO:0008194         | UDP-glycosyltransferas     | 0.18 | 12 | 1.2644889   | 322  | 0.9299102   |
| 3021  | GO:0004337         | geranyltransferase ac      | 0.18 | 1  | 0.105374075 | 7    | 0.020215439 |
| 3255  | GO:0004615(GO:0008 | phosphomannomutase         | 0.18 | 1  | 0.105374075 | 7    | 0.020215439 |
| 3357  | GO:0004738         | pyruvate dehydrogenas      | 0.18 | 1  | 0.105374075 | 7    | 0.020215439 |
| 3358  | GO:0004739         | pyruvate dehydrogenas      | 0.18 | 1  | 0.105374075 | 7    | 0.020215439 |
| 6801  | GO:0009512         | cytochrome b6f comple      | 0.18 | 1  | 0.105374075 | 7    | 0.020215439 |
| 16115 | GO:0033729         | anthocyanidin reductas     | 0.18 | 1  | 0.105374075 | 7    | 0.020215439 |
| 2833  | GO:0004024         | alcohol dehydrogenase      | 0.18 | 2  | 0.21074815  | 28   | 0.080861755 |
| 25476 | GO:0051179         | localization               | 0.18 | 71 | 7.4815598   | 2319 | 6.697086    |
| 6668  | GO:0009314         | response to radiation      | 0.18 | 4  | 0.4214963   | 81   | 0.23392151  |
| 6751  | GO:0009416         | response to light stimul   | 0.18 | 4  | 0.4214963   | 81   | 0.23392151  |
| 9697  | GO:0016614         | oxidoreductase activity    | 0.18 | 11 | 1.1591148   | 293  | 0.84616053  |
| 3787  | GO:0005319         | lipid transporter activi   | 0.19 | 4  | 0.4214963   | 83   | 0.23969735  |
| 8680  | GO:0015298         | solute:cation antiporter   | 0.19 | 5  | 0.52687037  | 112  | 0.32344702  |



|       |                       |                            |      |    |             |      |             |
|-------|-----------------------|----------------------------|------|----|-------------|------|-------------|
| 9730  | GO:0016651            | oxidoreductase activity    | 0.19 | 5  | 0.52687037  | 112  | 0.32344702  |
| 9883  | GO:0016846            | carbon-sulfur lyase acti   | 0.20 | 3  | 0.31612223  | 56   | 0.16172351  |
| 8683  | GO:0015301 GO:0015301 | anion:anion antiporter a   | 0.20 | 2  | 0.21074815  | 30   | 0.086637594 |
| 3306  | GO:0004674 GO:0004674 | protein serine/threonine   | 0.20 | 34 | 3.5827186   | 1062 | 3.0669708   |
| 3048  | GO:0004364            | glutathione transferase    | 0.20 | 4  | 0.4214963   | 84   | 0.24258527  |
| 3254  | GO:0004614            | phosphoglucosyltransferase | 0.20 | 1  | 0.105374075 | 8    | 0.023103358 |
| 3402  | GO:0004791            | thioredoxin-disulfide red  | 0.20 | 1  | 0.105374075 | 8    | 0.023103358 |
| 4035  | GO:0005746            | mitochondrial respirator   | 0.20 | 1  | 0.105374075 | 8    | 0.023103358 |
| 5953  | GO:0008471            | laccase activity           | 0.20 | 1  | 0.105374075 | 8    | 0.023103358 |
| 6613  | GO:0009250            | glucan biosynthetic pro    | 0.20 | 1  | 0.105374075 | 8    | 0.023103358 |
| 18639 | GO:0042284            | sphingolipid delta-4 des   | 0.20 | 1  | 0.105374075 | 8    | 0.023103358 |
| 22076 | GO:0046556            | alpha-N-arabinofuranos     | 0.20 | 1  | 0.105374075 | 8    | 0.023103358 |
| 28833 | GO:0070469            | respiratory chain          | 0.20 | 1  | 0.105374075 | 8    | 0.023103358 |
| 30696 | GO:0072337            | modified amino acid tra    | 0.20 | 1  | 0.105374075 | 8    | 0.023103358 |
| 30708 | GO:0072349            | modified amino acid tra    | 0.20 | 1  | 0.105374075 | 8    | 0.023103358 |
| 5195  | GO:0007165 GO:0023052 | signal transduction        | 0.20 | 31 | 3.2665963   | 961  | 2.775291    |
| 12602 | GO:0023052 GO:0023052 | signaling                  | 0.20 | 31 | 3.2665963   | 961  | 2.775291    |
| 4911  | GO:0006812 GO:0006812 | cation transport           | 0.21 | 22 | 2.3182297   | 662  | 1.9118029   |
| 9811  | GO:0016757 GO:0016757 | transferase activity, tran | 0.21 | 24 | 2.5289779   | 729  | 2.1052935   |
| 19952 | GO:0043687            | post-translational protei  | 0.21 | 4  | 0.4214963   | 86   | 0.24836111  |
| 4913  | GO:0006814 GO:0006814 | sodium ion transport       | 0.21 | 3  | 0.31612223  | 58   | 0.16749935  |
| 8499  | GO:0015081 GO:0022843 | sodium ion transmembr      | 0.21 | 3  | 0.31612223  | 58   | 0.16749935  |
| 18086 | GO:0035725            | sodium ion transmembr      | 0.21 | 3  | 0.31612223  | 58   | 0.16749935  |
| 29800 | GO:0071436            | sodium ion export          | 0.21 | 3  | 0.31612223  | 58   | 0.16749935  |
| 4954  | GO:0006869            | lipid transport            | 0.21 | 8  | 0.8429926   | 208  | 0.6006873   |
| 8085  | GO:0010876            | lipid localization         | 0.21 | 8  | 0.8429926   | 208  | 0.6006873   |
| 4246  | GO:0006006            | glucose metabolic proc     | 0.22 | 4  | 0.4214963   | 87   | 0.25124902  |
| 4481  | GO:0006284            | base-excision repair       | 0.22 | 2  | 0.21074815  | 32   | 0.09241343  |
| 21041 | GO:0045431            | flavonol synthase activi   | 0.22 | 2  | 0.21074815  | 32   | 0.09241343  |
| 25836 | GO:0051552            | flavone metabolic proc     | 0.22 | 2  | 0.21074815  | 32   | 0.09241343  |
| 25837 | GO:0051553            | flavone biosynthetic pro   | 0.22 | 2  | 0.21074815  | 32   | 0.09241343  |
| 25838 | GO:0051554            | flavonol metabolic proc    | 0.22 | 2  | 0.21074815  | 32   | 0.09241343  |
| 25839 | GO:0051555            | flavonol biosynthetic pr   | 0.22 | 2  | 0.21074815  | 32   | 0.09241343  |
| 2831  | GO:0004022            | alcohol dehydrogenase      | 0.22 | 3  | 0.31612223  | 59   | 0.17038727  |
| 4322  | GO:0006084            | acetyl-CoA metabolic p     | 0.22 | 1  | 0.105374075 | 9    | 0.025991278 |
| 4332  | GO:0006099            | tricarboxylic acid cycle   | 0.22 | 1  | 0.105374075 | 9    | 0.025991278 |
| 6429  | GO:0009060            | aerobic respiration        | 0.22 | 1  | 0.105374075 | 9    | 0.025991278 |
| 6476  | GO:0009109            | coenzyme catabolic pro     | 0.22 | 1  | 0.105374075 | 9    | 0.025991278 |
| 6670  | GO:0009317            | acetyl-CoA carboxylase     | 0.22 | 1  | 0.105374075 | 9    | 0.025991278 |
| 7225  | GO:0009978            | allene oxide synthase a    | 0.22 | 1  | 0.105374075 | 9    | 0.025991278 |
| 19254 | GO:0042937            | tripeptide transporter ad  | 0.22 | 1  | 0.105374075 | 9    | 0.025991278 |
| 19342 | GO:0043027            | caspase inhibitor activi   | 0.22 | 1  | 0.105374075 | 9    | 0.025991278 |
| 19343 | GO:0043028            | caspase regulator activ    | 0.22 | 1  | 0.105374075 | 9    | 0.025991278 |
| 19458 | GO:0043154 GO:0001088 | negative regulation of c   | 0.22 | 1  | 0.105374075 | 9    | 0.025991278 |
| 19579 | GO:0043281 GO:0043281 | regulation of caspase a    | 0.22 | 1  | 0.105374075 | 9    | 0.025991278 |
| 21885 | GO:0046356            | acetyl-CoA catabolic pr    | 0.22 | 1  | 0.105374075 | 9    | 0.025991278 |
| 25484 | GO:0051187            | cofactor catabolic proc    | 0.22 | 1  | 0.105374075 | 9    | 0.025991278 |
| 2837  | GO:0004028            | 3-chloroalyl aldehyde d    | 0.22 | 1  | 0.105374075 | 9    | 0.025991278 |
| 24966 | GO:0050660            | flavin adenine dinucleo    | 0.22 | 5  | 0.52687037  | 118  | 0.34077454  |
| 5840  | GO:0008324            | cation transmembrane       | 0.23 | 18 | 1.8967334   | 538  | 1.5537009   |
| 9719  | GO:0016638            | oxidoreductase activity    | 0.23 | 4  | 0.4214963   | 89   | 0.25702485  |
| 3723  | GO:0005215 GO:0005215 | transporter activity       | 0.23 | 56 | 5.9009485   | 1844 | 5.325324    |
| 22376 | GO:0046873            | metal ion transmembra      | 0.23 | 8  | 0.8429926   | 213  | 0.6151269   |
| 3749  | GO:0005249            | voltage-gated potassium    | 0.24 | 2  | 0.21074815  | 34   | 0.09818927  |
| 5827  | GO:0008308 GO:0022843 | voltage-gated anion ch     | 0.24 | 2  | 0.21074815  | 34   | 0.09818927  |
| 20321 | GO:0044070            | regulation of anion tran   | 0.24 | 2  | 0.21074815  | 34   | 0.09818927  |
| 9294  | GO:0016052 GO:0006084 | carbohydrate catabolic     | 0.24 | 4  | 0.4214963   | 91   | 0.2628007   |
| 3040  | GO:0004356            | glutamate-ammonia lig      | 0.24 | 1  | 0.105374075 | 10   | 0.0288792   |
| 3203  | GO:0004557            | alpha-galactosidase ac     | 0.24 | 1  | 0.105374075 | 10   | 0.0288792   |
| 3264  | GO:0004629 GO:0042284 | phospholipase C activi     | 0.24 | 1  | 0.105374075 | 10   | 0.0288792   |
| 3842  | GO:0005432            | calcium:sodium antiport    | 0.24 | 1  | 0.105374075 | 10   | 0.0288792   |
| 5678  | GO:0008113 GO:0033033 | peptide-methionine-(S)     | 0.24 | 1  | 0.105374075 | 10   | 0.0288792   |
| 9424  | GO:0016211            | ammonia ligase activity    | 0.24 | 1  | 0.105374075 | 10   | 0.0288792   |
| 9741  | GO:0016668 GO:0016668 | oxidoreductase activity    | 0.24 | 1  | 0.105374075 | 10   | 0.0288792   |
| 9826  | GO:0016775            | phosphotransferase ac      | 0.24 | 1  | 0.105374075 | 10   | 0.0288792   |
| 9912  | GO:0016880            | acid-ammonia (or amid      | 0.24 | 1  | 0.105374075 | 10   | 0.0288792   |
| 11205 | GO:0019202            | amino acid kinase activ    | 0.24 | 1  | 0.105374075 | 10   | 0.0288792   |
| 12918 | GO:0030374            | ligand-dependent nucle     | 0.24 | 1  | 0.105374075 | 10   | 0.0288792   |
| 31707 | GO:0090116            | C-5 methylation of cyto    | 0.24 | 1  | 0.105374075 | 10   | 0.0288792   |
| 983   | GO:0001664            | G-protein-coupled rece     | 0.24 | 1  | 0.105374075 | 10   | 0.0288792   |
| 2736  | GO:0003886 GO:0008324 | DNA (cytosine-5)-meth      | 0.24 | 1  | 0.105374075 | 10   | 0.0288792   |
| 4215  | GO:0005975            | carbohydrate metabolic     | 0.25 | 31 | 3.2665963   | 990  | 2.8590407   |
| 17016 | GO:0034637            | cellular carbohydrate bi   | 0.25 | 3  | 0.31612223  | 63   | 0.18193895  |
| 21146 | GO:0045544            | gibberellin 20-oxidase     | 0.25 | 2  | 0.21074815  | 35   | 0.10107719  |
| 17617 | GO:0035251            | UDP-glucosyltransferas     | 0.25 | 8  | 0.8429926   | 218  | 0.62956655  |
| 26931 | GO:0055085            | transmembrane transpo      | 0.25 | 47 | 4.952582    | 1548 | 4.4705      |
| 9293  | GO:0016051 GO:0006084 | carbohydrate biosynthe     | 0.26 | 3  | 0.31612223  | 64   | 0.18482687  |
| 4236  | GO:0005996            | monosaccharide metab       | 0.26 | 5  | 0.52687037  | 125  | 0.36099     |
| 4232  | GO:0005992            | trehalose biosynthetic p   | 0.26 | 2  | 0.21074815  | 36   | 0.10396511  |
| 8739  | GO:0015385 GO:0015385 | sodium:hydrogen antiport   | 0.26 | 2  | 0.21074815  | 36   | 0.10396511  |
| 9185  | GO:0015925            | galactosidase activity     | 0.26 | 2  | 0.21074815  | 36   | 0.10396511  |
| 3380  | GO:0004766            | spermidine synthase ac     | 0.26 | 1  | 0.105374075 | 11   | 0.03176712  |
| 3416  | GO:0004806            | triglyceride lipase activ  | 0.26 | 1  | 0.105374075 | 11   | 0.03176712  |
| 11152 | GO:0019139 GO:0046356 | cytokinin dehydrogenas     | 0.26 | 1  | 0.105374075 | 11   | 0.03176712  |
| 13809 | GO:0031386            | protein tag                | 0.26 | 1  | 0.105374075 | 11   | 0.03176712  |
| 19256 | GO:0042939            | tripeptide transport       | 0.26 | 1  | 0.105374075 | 11   | 0.03176712  |
| 9710  | GO:0016628            | oxidoreductase activity    | 0.26 | 3  | 0.31612223  | 65   | 0.18771479  |
| 3761  | GO:0005275 GO:0005275 | amine transmembrane        | 0.26 | 5  | 0.52687037  | 126  | 0.3638779   |
| 25998 | GO:0051716            | cellular response to stir  | 0.26 | 35 | 3.6880927   | 1138 | 3.2864528   |
| 3318  | GO:0004693 GO:0016638 | cyclin-dependent protei    | 0.27 | 2  | 0.21074815  | 37   | 0.10685303  |
| 3758  | GO:0005267            | potassium channel activ    | 0.27 | 2  | 0.21074815  | 37   | 0.10685303  |
| 24968 | GO:0050662            | coenzyme binding           | 0.27 | 7  | 0.73761857  | 191  | 0.5515927   |
| 5791  | GO:0008270            | zinc ion binding           | 0.28 | 56 | 5.9009485   | 1880 | 5.4292893   |
| 4231  | GO:0005991            | trehalose metabolic pro    | 0.28 | 2  | 0.21074815  | 38   | 0.10974095  |
| 8501  | GO:0015085            | calcium ion transmembr     | 0.28 | 2  | 0.21074815  | 38   | 0.10974095  |
| 12538 | GO:0022843            | voltage-gated cation ch    | 0.28 | 2  | 0.21074815  | 38   | 0.10974095  |
| 6383  | GO:0009008            | DNA-methyltransferase      | 0.28 | 1  | 0.105374075 | 12   | 0.03465504  |
| 6451  | GO:0009082            | branched chain family      | 0.28 | 1  | 0.105374075 | 12   | 0.03465504  |
| 7526  | GO:0010301 GO:0033033 | xanthoxin dehydrogena      | 0.28 | 1  | 0.105374075 | 12   | 0.03465504  |
| 8748  | GO:0015398            | high affinity secondary    | 0.28 | 1  | 0.105374075 | 12   | 0.03465504  |
| 9235  | GO:0015976 GO:0015976 | carbon utilization         | 0.28 | 1  | 0.105374075 | 12   | 0.03465504  |
| 14848 | GO:0032440            | 2-alkenal reductase act    | 0.28 | 1  | 0.105374075 | 12   | 0.03465504  |
| 16148 | GO:0033764            | steroid dehydrogenase      | 0.28 | 1  | 0.105374075 | 12   | 0.03465504  |



|       |                    |                            |      |     |             |      |             |
|-------|--------------------|----------------------------|------|-----|-------------|------|-------------|
| 20943 | GO:0045333         | cellular respiration       | 0.28 | 1   | 0.105374075 | 12   | 0.03465504  |
| 4990  | GO:0006915 GO:0008 | apoptosis                  | 0.29 | 8   | 0.8429926   | 227  | 0.6555578   |
| 6796  | GO:0009507         | chloroplast                | 0.29 | 8   | 0.8429926   | 229  | 0.6613336   |
| 21710 | GO:0046148         | pigment biosynthetic pr    | 0.29 | 3   | 0.31612223  | 69   | 0.19926646  |
| 31420 | GO:0080043         | quercetin 3-O-glucosylt    | 0.29 | 3   | 0.31612223  | 69   | 0.19926646  |
| 9422  | GO:0016209         | antioxidant activity       | 0.30 | 6   | 0.63224447  | 165  | 0.47650677  |
| 7072  | GO:0009813         | flavonoid biosynthetic p   | 0.30 | 2   | 0.21074815  | 40   | 0.1155168   |
| 11311 | GO:0019318         | hexose metabolic proces    | 0.30 | 4   | 0.4214963   | 101  | 0.2916799   |
| 6811  | GO:0009523         | photosystem II             | 0.30 | 1   | 0.105374075 | 13   | 0.037542958 |
| 8149  | GO:0010941         | regulation of cell death   | 0.30 | 1   | 0.105374075 | 13   | 0.037542958 |
| 19043 | GO:0042719         | mitochondrial intermem     | 0.30 | 1   | 0.105374075 | 13   | 0.037542958 |
| 19298 | GO:0042981         | regulation of apoptosis    | 0.30 | 1   | 0.105374075 | 13   | 0.037542958 |
| 19381 | GO:0043067 GO:0043 | regulation of programm     | 0.30 | 1   | 0.105374075 | 13   | 0.037542958 |
| 5874  | GO:0008374         | O-acyltransferase activ    | 0.31 | 4   | 0.4214963   | 102  | 0.29456782  |
| 28378 | GO:0070011         | peptidase activity, actin  | 0.31 | 17  | 1.7913593   | 537  | 1.550813    |
| 4408  | GO:0006200         | ATP catabolic process      | 0.31 | 20  | 2.1074815   | 641  | 1.8511566   |
| 9918  | GO:0016887 GO:0004 | ATPase activity            | 0.31 | 20  | 2.1074815   | 641  | 1.8511566   |
| 21600 | GO:0046034         | ATP metabolic process      | 0.31 | 20  | 2.1074815   | 641  | 1.8511566   |
| 9103  | GO:0015837         | amine transport            | 0.31 | 5   | 0.52687037  | 135  | 0.38986918  |
| 12547 | GO:0022857 GO:0005 | transmembrane transpo      | 0.31 | 44  | 4.6364594   | 1483 | 4.282785    |
| 9740  | GO:0016667         | oxidoreductase activity    | 0.32 | 3   | 0.31612223  | 72   | 0.20793022  |
| 30069 | GO:0071705         | nitrogen compound tran     | 0.32 | 7   | 0.73761857  | 202  | 0.5833598   |
| 20532 | GO:0044282         | small molecule cataboli    | 0.32 | 26  | 2.739726    | 854  | 2.4662836   |
| 3753  | GO:0005253         | anion channel activity     | 0.32 | 2   | 0.21074815  | 42   | 0.121292636 |
| 6666  | GO:0009312         | oligosaccharide biosynt    | 0.32 | 2   | 0.21074815  | 42   | 0.121292636 |
| 9370  | GO:0016138         | glycoside biosynthetic p   | 0.32 | 2   | 0.21074815  | 42   | 0.121292636 |
| 13884 | GO:0031461         | cullin-RING ubiquitin lig  | 0.32 | 2   | 0.21074815  | 42   | 0.121292636 |
| 21880 | GO:0046351         | disaccharide biosynthe     | 0.32 | 2   | 0.21074815  | 42   | 0.121292636 |
| 7844  | GO:0010629         | negative regulation of g   | 0.32 | 1   | 0.105374075 | 14   | 0.040430877 |
| 9399  | GO:0016174         | NAD(P)H oxidase activ      | 0.32 | 1   | 0.105374075 | 14   | 0.040430877 |
| 9433  | GO:0016229         | steroid dehydrogenase      | 0.32 | 1   | 0.105374075 | 14   | 0.040430877 |
| 9854  | GO:0016812         | hydrolase activity, actin  | 0.32 | 1   | 0.105374075 | 14   | 0.040430877 |
| 9879  | GO:0016841         | ammonia-lyase activity     | 0.32 | 1   | 0.105374075 | 14   | 0.040430877 |
| 15178 | GO:0032776         | DNA methylation on cy      | 0.32 | 1   | 0.105374075 | 14   | 0.040430877 |
| 21460 | GO:0045892 GO:0016 | negative regulation of tr  | 0.32 | 1   | 0.105374075 | 14   | 0.040430877 |
| 21502 | GO:0045934         | negative regulation of r   | 0.32 | 1   | 0.105374075 | 14   | 0.040430877 |
| 24970 | GO:0050664         | oxidoreductase activity    | 0.32 | 1   | 0.105374075 | 14   | 0.040430877 |
| 25469 | GO:0051172         | negative regulation of r   | 0.32 | 1   | 0.105374075 | 14   | 0.040430877 |
| 25545 | GO:0051253         | negative regulation of F   | 0.32 | 1   | 0.105374075 | 14   | 0.040430877 |
| 6899  | GO:0009628         | response to abiotic stiri  | 0.32 | 6   | 0.63224447  | 170  | 0.49094638  |
| 18786 | GO:0042440         | pigment metabolic proc     | 0.32 | 3   | 0.31612223  | 73   | 0.21081814  |
| 5756  | GO:0008219         | cell death                 | 0.33 | 8   | 0.8429926   | 239  | 0.69021285  |
| 8209  | GO:0012501 GO:0016 | programmed cell death      | 0.33 | 8   | 0.8429926   | 239  | 0.69021285  |
| 9462  | GO:0016265         | death                      | 0.33 | 8   | 0.8429926   | 239  | 0.69021285  |
| 8675  | GO:0015293         | symporter activity         | 0.34 | 6   | 0.63224447  | 173  | 0.49961013  |
| 25095 | GO:0050790         | regulation of catalytic a  | 0.34 | 15  | 1.5806112   | 480  | 1.3862015   |
| 4914  | GO:0006816         | calcium ion transport      | 0.34 | 2   | 0.21074815  | 44   | 0.12706847  |
| 7071  | GO:0009812         | flavonoid metabolic pro    | 0.34 | 2   | 0.21074815  | 44   | 0.12706847  |
| 28952 | GO:0070588         | calcium ion transmemb      | 0.34 | 2   | 0.21074815  | 44   | 0.12706847  |
| 7520  | GO:0010294         | abscisic acid glucosyltra  | 0.34 | 1   | 0.105374075 | 15   | 0.043318797 |
| 9340  | GO:0016108         | tetraterpenoid metabol     | 0.34 | 1   | 0.105374075 | 15   | 0.043318797 |
| 9341  | GO:0016109         | tetraterpenoid biosynth    | 0.34 | 1   | 0.105374075 | 15   | 0.043318797 |
| 9348  | GO:0016116         | carotenoid metabolic pr    | 0.34 | 1   | 0.105374075 | 15   | 0.043318797 |
| 9349  | GO:0016117         | carotenoid biosynthetic    | 0.34 | 1   | 0.105374075 | 15   | 0.043318797 |
| 10079 | GO:0017134         | fibroblast growth factor   | 0.34 | 1   | 0.105374075 | 15   | 0.043318797 |
| 16081 | GO:0033692         | cellular polysaccharide    | 0.34 | 1   | 0.105374075 | 15   | 0.043318797 |
| 8676  | GO:0015294         | solute:cation symporter    | 0.34 | 5   | 0.52687037  | 141  | 0.4071967   |
| 5663  | GO:0008094 GO:0004 | DNA-dependent ATPase       | 0.35 | 3   | 0.31612223  | 76   | 0.2194819   |
| 28366 | GO:0065009         | regulation of molecular    | 0.35 | 15  | 1.5806112   | 484  | 1.3977532   |
| 8666  | GO:0015276         | ligand-gated ion chann     | 0.35 | 2   | 0.21074815  | 45   | 0.1299564   |
| 12530 | GO:0022834         | ligand-gated channel at    | 0.35 | 2   | 0.21074815  | 45   | 0.1299564   |
| 4304  | GO:0006066         | alcohol metabolic proces   | 0.36 | 5   | 0.52687037  | 143  | 0.41297254  |
| 9795  | GO:0016740         | transferase activity       | 0.36 | 107 | 11.275026   | 3764 | 10.870131   |
| 5995  | GO:0008524         | glucose 6-phosphate-ph     | 0.36 | 1   | 0.105374075 | 16   | 0.046206716 |
| 7142  | GO:0009890         | negative regulation of b   | 0.36 | 1   | 0.105374075 | 16   | 0.046206716 |
| 7774  | GO:0010558         | negative regulation of r   | 0.36 | 1   | 0.105374075 | 16   | 0.046206716 |
| 7820  | GO:0010605         | negative regulation of r   | 0.36 | 1   | 0.105374075 | 16   | 0.046206716 |
| 8694  | GO:0015315         | organophosphate:inorg      | 0.36 | 1   | 0.105374075 | 16   | 0.046206716 |
| 9189  | GO:0015929         | hexosaminidase activi      | 0.36 | 1   | 0.105374075 | 16   | 0.046206716 |
| 9390  | GO:0016161         | beta-amylase activity      | 0.36 | 1   | 0.105374075 | 16   | 0.046206716 |
| 9727  | GO:0016647         | oxidoreductase activity    | 0.36 | 1   | 0.105374075 | 16   | 0.046206716 |
| 9878  | GO:0016840         | carbon-nitrogen lyase a    | 0.36 | 1   | 0.105374075 | 16   | 0.046206716 |
| 13757 | GO:0031327         | negative regulation of c   | 0.36 | 1   | 0.105374075 | 16   | 0.046206716 |
| 18757 | GO:0042409         | caffeoyl-CoA O-methylt     | 0.36 | 1   | 0.105374075 | 16   | 0.046206716 |
| 22110 | GO:0046592         | polyamine oxidase activ    | 0.36 | 1   | 0.105374075 | 16   | 0.046206716 |
| 22412 | GO:0046910         | peclnesterase inhibitor    | 0.36 | 1   | 0.105374075 | 16   | 0.046206716 |
| 32214 | GO:2000113         | negative regulation of c   | 0.36 | 1   | 0.105374075 | 16   | 0.046206716 |
| 206   | GO:0000271         | polysaccharide biosynt     | 0.36 | 1   | 0.105374075 | 16   | 0.046206716 |
| 219   | GO:0000287         | magnesium ion binding      | 0.36 | 1   | 0.105374075 | 16   | 0.046206716 |
| 8943  | GO:0015672         | monovalent inorganic c     | 0.36 | 12  | 1.2644889   | 383  | 1.1060733   |
| 9909  | GO:0016877         | ligase activity, forming d | 0.36 | 3   | 0.31612223  | 78   | 0.22525774  |
| 6425  | GO:0009056         | catabolic process          | 0.36 | 31  | 3.2665963   | 1051 | 3.0352037   |
| 6824  | GO:0009536         | plastid                    | 0.37 | 8   | 0.8429926   | 247  | 0.7133162   |
| 20512 | GO:0044262 GO:0006 | cellular carbohydrate m    | 0.37 | 8   | 0.8429926   | 248  | 0.7162041   |
| 4044  | GO:0005758 GO:0031 | mitochondrial intermem     | 0.38 | 1   | 0.105374075 | 17   | 0.049094636 |
| 9923  | GO:0016892         | endoribonuclease activ     | 0.38 | 1   | 0.105374075 | 17   | 0.049094636 |
| 9925  | GO:0016894         | endonuclease activity, s   | 0.38 | 1   | 0.105374075 | 17   | 0.049094636 |
| 14383 | GO:0031970         | organelle envelope lum     | 0.38 | 1   | 0.105374075 | 17   | 0.049094636 |
| 16281 | GO:0033897         | ribonuclease T2 activity   | 0.38 | 1   | 0.105374075 | 17   | 0.049094636 |
| 20619 | GO:0044425         | membrane part              | 0.38 | 44  | 4.6364594   | 1523 | 4.398302    |
| 22478 | GO:0046982         | protein heterodimerizat    | 0.38 | 4   | 0.4214963   | 114  | 0.32922286  |
| 5763  | GO:0008233         | peptidase activity         | 0.38 | 17  | 1.7913593   | 565  | 1.6316746   |
| 3756  | GO:0005261 GO:0015 | cation channel activity    | 0.39 | 2   | 0.21074815  | 49   | 0.14150807  |
| 3844  | GO:0005451         | monovalent cation hydr     | 0.39 | 2   | 0.21074815  | 49   | 0.14150807  |
| 9725  | GO:0016645         | oxidoreductase activity    | 0.39 | 2   | 0.21074815  | 49   | 0.14150807  |
| 31421 | GO:0080044         | quercetin 7-O-glucosylt    | 0.39 | 2   | 0.21074815  | 49   | 0.14150807  |
| 3832  | GO:0005388         | calcium-transporting AT    | 0.39 | 1   | 0.105374075 | 18   | 0.051982556 |
| 4134  | GO:0005874         | microtubule                | 0.39 | 1   | 0.105374075 | 18   | 0.051982556 |
| 6416  | GO:0009044         | xylan 1,4-beta-xylosida    | 0.39 | 1   | 0.105374075 | 18   | 0.051982556 |
| 12887 | GO:0030332         | cyclin binding             | 0.39 | 1   | 0.105374075 | 18   | 0.051982556 |
| 9818  | GO:0016765 GO:0016 | transferase activity, tran | 0.40 | 6   | 0.63224447  | 185  | 0.53426516  |
| 4912  | GO:0006813 GO:0015 | potassium ion transport    | 0.41 | 3   | 0.31612223  | 84   | 0.24258527  |
| 30168 | GO:0071804         | cellular potassium ion t   | 0.41 | 3   | 0.31612223  | 84   | 0.24258527  |



|       |                       |                                                       |      |    |             |      |             |
|-------|-----------------------|-------------------------------------------------------|------|----|-------------|------|-------------|
| 30169 | GO:0071805            | potassium ion transmembrane                           | 0.41 | 3  | 0.31612223  | 84   | 0.24258527  |
| 8584  | GO:0015171 GO:0015172 | amino acid transmembrane                              | 0.41 | 4  | 0.4214963   | 118  | 0.34077454  |
| 2521  | GO:0003333            | amino acid transmembrane                              | 0.41 | 4  | 0.4214963   | 118  | 0.34077454  |
| 7173  | GO:0009922            | fatty acid elongase activity                          | 0.41 | 2  | 0.21074815  | 51   | 0.14728391  |
| 9733  | GO:0016655            | oxidoreductase activity                               | 0.41 | 2  | 0.21074815  | 51   | 0.14728391  |
| 9975  | GO:0016998            | cell wall macromolecule                               | 0.41 | 2  | 0.21074815  | 51   | 0.14728391  |
| 9809  | GO:0016755            | transferase activity, transmembrane                   | 0.41 | 1  | 0.105374075 | 19   | 0.054870475 |
| 9891  | GO:0016855            | racemase and epimerase                                | 0.41 | 1  | 0.105374075 | 19   | 0.054870475 |
| 2895  | GO:0004089            | carbonate dehydratase                                 | 0.41 | 1  | 0.105374075 | 19   | 0.054870475 |
| 5097  | GO:0007049            | cell cycle                                            | 0.42 | 2  | 0.21074815  | 52   | 0.15017183  |
| 6965  | GO:0009699            | phenylpropanoid biosynthesis                          | 0.42 | 2  | 0.21074815  | 52   | 0.15017183  |
| 20287 | GO:0044036            | cell wall macromolecule                               | 0.42 | 2  | 0.21074815  | 52   | 0.15017183  |
| 3124  | GO:0004462            | lactoylglutathione lyase                              | 0.43 | 1  | 0.105374075 | 20   | 0.0577584   |
| 3747  | GO:0005247            | voltage-gated chloride channel                        | 0.43 | 1  | 0.105374075 | 20   | 0.0577584   |
| 3754  | GO:0005254            | chloride channel activity                             | 0.43 | 1  | 0.105374075 | 20   | 0.0577584   |
| 3798  | GO:0005337            | nucleoside transmembrane                              | 0.43 | 1  | 0.105374075 | 20   | 0.0577584   |
| 5991  | GO:0008519            | ammonium transmembrane                                | 0.43 | 1  | 0.105374075 | 20   | 0.0577584   |
| 8726  | GO:0015368            | calcium:cation antiporter                             | 0.43 | 1  | 0.105374075 | 20   | 0.0577584   |
| 8965  | GO:0015696            | ammonium transport                                    | 0.43 | 1  | 0.105374075 | 20   | 0.0577584   |
| 9122  | GO:0015858            | nucleoside transport                                  | 0.43 | 1  | 0.105374075 | 20   | 0.0577584   |
| 9799  | GO:0016744 GO:0016745 | transferase activity, transmembrane                   | 0.43 | 1  | 0.105374075 | 20   | 0.0577584   |
| 30844 | GO:0072488            | ammonium transmembrane                                | 0.43 | 1  | 0.105374075 | 20   | 0.0577584   |
| 2675  | GO:0003825            | alpha,alpha-trehalose-6-phosphate                     | 0.43 | 1  | 0.105374075 | 20   | 0.0577584   |
| 12532 | GO:0022836            | gated channel activity                                | 0.43 | 4  | 0.4214963   | 122  | 0.3523262   |
| 119   | GO:0000151            | ubiquitin ligase complex                              | 0.43 | 3  | 0.31612223  | 88   | 0.25413695  |
| 4951  | GO:0006865 GO:0006866 | amino acid transport                                  | 0.44 | 4  | 0.4214963   | 123  | 0.35521415  |
| 2897  | GO:0004091 GO:0004092 | carboxylesterase activity                             | 0.44 | 6  | 0.63224447  | 194  | 0.5602564   |
| 3129  | GO:0004467            | long-chain fatty acid-CoA synthetase                  | 0.44 | 1  | 0.105374075 | 21   | 0.060646318 |
| 3474  | GO:0004869 GO:0004870 | cysteine-type endopeptidase                           | 0.44 | 1  | 0.105374075 | 21   | 0.060646318 |
| 9902  | GO:0016868 GO:0016869 | intramolecular transferase                            | 0.44 | 1  | 0.105374075 | 21   | 0.060646318 |
| 12999 | GO:0030506            | ankyrin binding                                       | 0.44 | 1  | 0.105374075 | 21   | 0.060646318 |
| 23518 | GO:0048040            | UDP-glucuronate decarboxylase                         | 0.44 | 1  | 0.105374075 | 21   | 0.060646318 |
| 716   | GO:0001071            | nucleic acid binding transcription factor             | 0.45 | 40 | 4.214963    | 1417 | 4.0921826   |
| 2643  | GO:0003700 GO:0003701 | sequence-specific DNA binding                         | 0.45 | 40 | 4.214963    | 1417 | 4.0921826   |
| 9533  | GO:0016405            | CoA-ligase activity                                   | 0.45 | 2  | 0.21074815  | 55   | 0.15883559  |
| 4224  | GO:0005984            | disaccharide metabolic process                        | 0.46 | 2  | 0.21074815  | 56   | 0.16172351  |
| 9369  | GO:0016137            | glycoside metabolic process                           | 0.46 | 2  | 0.21074815  | 56   | 0.16172351  |
| 10032 | GO:0017075            | syntaxin-1 binding                                    | 0.46 | 1  | 0.105374075 | 22   | 0.06353424  |
| 12660 | GO:0030077            | plasma membrane light transmission                    | 0.46 | 1  | 0.105374075 | 22   | 0.06353424  |
| 13038 | GO:0030551            | cyclic nucleotide binding                             | 0.46 | 2  | 0.105374075 | 22   | 0.06353424  |
| 19040 | GO:0042716            | plasma membrane-derived                               | 0.46 | 1  | 0.105374075 | 22   | 0.06353424  |
| 19325 | GO:0043008            | ATP-dependent protein                                 | 0.46 | 1  | 0.105374075 | 22   | 0.06353424  |
| 24858 | GO:0050551            | myrcene synthase activity                             | 0.46 | 1  | 0.105374075 | 22   | 0.06353424  |
| 4405  | GO:0006195            | purine nucleotide catabolic process                   | 0.46 | 22 | 2.3182297   | 773  | 2.232362    |
| 6508  | GO:0009143            | nucleoside triphosphate                               | 0.46 | 22 | 2.3182297   | 773  | 2.232362    |
| 6509  | GO:0009144            | purine nucleoside triphosphate                        | 0.46 | 22 | 2.3182297   | 773  | 2.232362    |
| 6511  | GO:0009146            | purine nucleoside triphosphate                        | 0.46 | 22 | 2.3182297   | 773  | 2.232362    |
| 6519  | GO:0009154            | purine ribonucleotide catabolic process               | 0.46 | 22 | 2.3182297   | 773  | 2.232362    |
| 6530  | GO:0009166            | nucleotide catabolic process                          | 0.46 | 22 | 2.3182297   | 773  | 2.232362    |
| 6567  | GO:0009203            | ribonucleoside triphosphate                           | 0.46 | 22 | 2.3182297   | 773  | 2.232362    |
| 6569  | GO:0009205            | purine ribonucleoside triphosphate                    | 0.46 | 22 | 2.3182297   | 773  | 2.232362    |
| 6571  | GO:0009207            | purine ribonucleoside triphosphate                    | 0.46 | 22 | 2.3182297   | 773  | 2.232362    |
| 6624  | GO:0009261            | ribonucleotide catabolic process                      | 0.46 | 22 | 2.3182297   | 773  | 2.232362    |
| 17034 | GO:0034655            | nucleobase, nucleoside                                | 0.46 | 22 | 2.3182297   | 773  | 2.232362    |
| 17035 | GO:0034656            | nucleobase, nucleoside                                | 0.46 | 22 | 2.3182297   | 773  | 2.232362    |
| 22209 | GO:0046700            | heterocycle catabolic process                         | 0.46 | 22 | 2.3182297   | 773  | 2.232362    |
| 30879 | GO:0072523            | purine-containing compound                            | 0.46 | 22 | 2.3182297   | 773  | 2.232362    |
| 5715  | GO:0008171            | O-methyltransferase activity                          | 0.47 | 2  | 0.21074815  | 57   | 0.16461143  |
| 9910  | GO:0016878            | acid-thiol ligase activity                            | 0.47 | 2  | 0.21074815  | 57   | 0.16461143  |
| 20520 | GO:0044270            | cellular nitrogen compound                            | 0.47 | 22 | 2.3182297   | 777  | 2.2439137   |
| 4918  | GO:0006821            | chloride transport                                    | 0.47 | 1  | 0.105374075 | 23   | 0.06642216  |
| 22753 | GO:0047262 GO:0050303 | polygalacturonate 4-aldolase                          | 0.47 | 1  | 0.105374075 | 23   | 0.06642216  |
| 2633  | GO:0003684            | damaged DNA binding                                   | 0.47 | 1  | 0.105374075 | 23   | 0.06642216  |
| 6665  | GO:0009311            | oligosaccharide metabolic process                     | 0.47 | 2  | 0.21074815  | 58   | 0.16749935  |
| 9801  | GO:0016747            | transferase activity, transmembrane                   | 0.48 | 13 | 1.369863    | 456  | 1.3168914   |
| 30066 | GO:0071702            | organic substance transport                           | 0.48 | 15 | 1.5806112   | 529  | 1.5277096   |
| 9900  | GO:0016866            | intramolecular transferase                            | 0.48 | 2  | 0.21074815  | 59   | 0.17038727  |
| 18981 | GO:0042651            | thylakoid membrane                                    | 0.48 | 2  | 0.21074815  | 59   | 0.17038727  |
| 11712 | GO:0019748            | secondary metabolic process                           | 0.48 | 3  | 0.31612223  | 95   | 0.27435237  |
| 18633 | GO:0042277            | peptide binding                                       | 0.48 | 3  | 0.31612223  | 95   | 0.27435237  |
| 4311  | GO:0006073            | cellular glucan metabolic process                     | 0.49 | 1  | 0.105374075 | 24   | 0.06931008  |
| 7144  | GO:0009892            | negative regulation of nucleic acid metabolic process | 0.49 | 1  | 0.105374075 | 24   | 0.06931008  |
| 13754 | GO:0031324            | negative regulation of cell growth                    | 0.49 | 1  | 0.105374075 | 24   | 0.06931008  |
| 20293 | GO:0044042            | glucan metabolic process                              | 0.49 | 1  | 0.105374075 | 24   | 0.06931008  |
| 20498 | GO:0044248            | cellular catabolic process                            | 0.49 | 25 | 2.634352    | 894  | 2.5818002   |
| 3304  | GO:0004672 GO:0050302 | protein kinase activity                               | 0.49 | 37 | 3.898841    | 1333 | 3.8495972   |
| 2980  | GO:0004185            | serine-type carboxypeptidase                          | 0.49 | 2  | 0.21074815  | 60   | 0.17327519  |
| 6964  | GO:0009698            | phenylpropanoid metabolic process                     | 0.49 | 2  | 0.21074815  | 60   | 0.17327519  |
| 28375 | GO:0070008            | serine-type exopeptidase                              | 0.49 | 2  | 0.21074815  | 60   | 0.17327519  |
| 9800  | GO:0016746            | transferase activity, transmembrane                   | 0.50 | 14 | 1.4752371   | 498  | 1.438184    |
| 6563  | GO:0009199            | ribonucleoside triphosphate                           | 0.50 | 22 | 2.3182297   | 790  | 2.2814567   |
| 9482  | GO:0016291 GO:0008172 | acyl-CoA thioesterase activity                        | 0.50 | 1  | 0.105374075 | 25   | 0.072197996 |
| 31493 | GO:0080118            | brassinosteroid sulfotransferase                      | 0.50 | 1  | 0.105374075 | 25   | 0.072197996 |
| 6515  | GO:0009150            | purine ribonucleotide metabolic process               | 0.50 | 22 | 2.3182297   | 791  | 2.2843447   |
| 5712  | GO:0008168 GO:0004403 | methyltransferase activity                            | 0.50 | 7  | 0.73761857  | 244  | 0.7046524   |
| 8681  | GO:0015299            | solute:hydrogen antiporter                            | 0.51 | 3  | 0.31612223  | 98   | 0.28301615  |
| 25379 | GO:0051082            | unfolded protein binding                              | 0.51 | 3  | 0.31612223  | 98   | 0.28301615  |
| 2978  | GO:0004180            | carboxypeptidase activity                             | 0.51 | 2  | 0.21074815  | 62   | 0.17905103  |
| 3801  | GO:0005342            | organic acid transmembrane                            | 0.51 | 4  | 0.4214963   | 136  | 0.3927571   |
| 22444 | GO:0046943            | carboxylic acid transmembrane                         | 0.51 | 4  | 0.4214963   | 136  | 0.3927571   |
| 6506  | GO:0009141            | nucleoside triphosphate                               | 0.51 | 22 | 2.3182297   | 796  | 2.2987843   |
| 3210  | GO:0004565            | beta-galactosidase activity                           | 0.51 | 1  | 0.105374075 | 26   | 0.075085916 |
| 3415  | GO:0004805            | trehalose-phosphatase                                 | 0.51 | 1  | 0.105374075 | 26   | 0.075085916 |
| 4030  | GO:0005741            | mitochondrial outer membrane                          | 0.51 | 1  | 0.105374075 | 26   | 0.075085916 |
| 8516  | GO:0015101            | organic cation transmembrane                          | 0.51 | 1  | 0.105374075 | 26   | 0.075085916 |
| 8964  | GO:0015695            | organic cation transport                              | 0.51 | 1  | 0.105374075 | 26   | 0.075085916 |
| 9421  | GO:0016208            | AMP binding                                           | 0.51 | 1  | 0.105374075 | 26   | 0.075085916 |
| 9884  | GO:0016847 GO:0034181 | 1-aminocyclopropane-1-carboxylate                     | 0.51 | 1  | 0.105374075 | 26   | 0.075085916 |
| 10911 | GO:0018871            | 1-aminocyclopropane-1-carboxylate                     | 0.51 | 1  | 0.105374075 | 26   | 0.075085916 |
| 17147 | GO:0034768            | (E)-beta-ocimene synthase                             | 0.51 | 1  | 0.105374075 | 26   | 0.075085916 |
| 18579 | GO:0042218            | 1-aminocyclopropane-1-carboxylate                     | 0.51 | 1  | 0.105374075 | 26   | 0.075085916 |
| 30689 | GO:0072330            | monocarboxylic acid binding                           | 0.51 | 1  | 0.105374075 | 26   | 0.075085916 |
| 14667 | GO:0032259            | methylation                                           | 0.52 | 8  | 0.8429926   | 285  | 0.8230572   |



|       |                     |                            |      |     |             |       |             |
|-------|---------------------|----------------------------|------|-----|-------------|-------|-------------|
| 22416 | GO:0046915          | transition metal ion tran  | 0.53 | 2   | 0.21074815  | 64    | 0.18482687  |
| 25820 | GO:0051536          | iron-sulfur cluster bindin | 0.53 | 2   | 0.21074815  | 64    | 0.18482687  |
| 25824 | GO:0051540          | metal cluster binding      | 0.53 | 2   | 0.21074815  | 64    | 0.18482687  |
| 9346  | GO:0016114          | terpenoid biosynthetic p   | 0.53 | 1   | 0.105374075 | 27    | 0.077973835 |
| 9389  | GO:0016160          | amylase activity           | 0.53 | 1   | 0.105374075 | 27    | 0.077973835 |
| 4849  | GO:0006730 GO:00191 | one-carbon metabolic p     | 0.53 | 9   | 0.9483667   | 325   | 0.93857396  |
| 10058 | GO:0017111          | nucleoside-triphosphata    | 0.53 | 24  | 2.5289779   | 878   | 2.5355935   |
| 25314 | GO:0051015          | actin filament binding     | 0.54 | 2   | 0.21074815  | 65    | 0.18771479  |
| 3724  | GO:0005216          | ion channel activity       | 0.54 | 4   | 0.4214963   | 140   | 0.40430877  |
| 9579  | GO:0016462          | pyrophosphatase activi     | 0.54 | 26  | 2.739726    | 954   | 2.7550755   |
| 3284  | GO:0004650          | polygalacturonase activ    | 0.54 | 1   | 0.105374075 | 28    | 0.080861755 |
| 3812  | GO:0005355 GO:00153 | glucose transmembran       | 0.54 | 1   | 0.105374075 | 28    | 0.080861755 |
| 6079  | GO:0008654          | phospholipid biosynthe     | 0.54 | 1   | 0.105374075 | 28    | 0.080861755 |
| 9027  | GO:0015758          | glucose transport          | 0.54 | 1   | 0.105374075 | 28    | 0.080861755 |
| 9238  | GO:0015980          | energy derivation by ox    | 0.54 | 1   | 0.105374075 | 28    | 0.080861755 |
| 23911 | GO:0048519 GO:0043  | negative regulation of b   | 0.54 | 1   | 0.105374075 | 28    | 0.080861755 |
| 23915 | GO:0048523 GO:00512 | negative regulation of c   | 0.54 | 1   | 0.105374075 | 28    | 0.080861755 |
| 139   | GO:0001175          | 3'-5'-exoribonuclease a    | 0.54 | 1   | 0.105374075 | 28    | 0.080861755 |
| 23515 | GO:0048037          | cofactor binding           | 0.54 | 9   | 0.9483667   | 327   | 0.94434977  |
| 3180  | GO:0004521          | endoribonuclease activ     | 0.54 | 2   | 0.21074815  | 66    | 0.1906027   |
| 9890  | GO:0016854          | racemase and epimera       | 0.54 | 6   | 0.21074815  | 66    | 0.1906027   |
| 9859  | GO:0016818          | hydrolase activity, actin  | 0.54 | 26  | 2.739726    | 956   | 2.7608514   |
| 4373  | GO:0006163          | purine nucleotide metat    | 0.55 | 22  | 2.3182297   | 810   | 2.339215    |
| 4916  | GO:0006818          | hydrogen transport         | 0.55 | 8   | 0.8429926   | 292   | 0.84327257  |
| 9246  | GO:0015992          | proton transport           | 0.55 | 8   | 0.8429926   | 292   | 0.84327257  |
| 6166  | GO:0008757          | S-adenosylmethionine-      | 0.55 | 5   | 0.52687037  | 180   | 0.5198256   |
| 9858  | GO:0016817          | hydrolase activity, actin  | 0.55 | 26  | 2.739726    | 959   | 2.769515    |
| 2668  | GO:0003779          | actin binding              | 0.55 | 3   | 0.31612223  | 105   | 0.3032316   |
| 6622  | GO:0009259 GO:0009  | ribonucleotide metaboli    | 0.55 | 22  | 2.3182297   | 812   | 2.344991    |
| 4755  | GO:0006629          | lipid metabolic process    | 0.55 | 16  | 1.6859852   | 590   | 1.7038727   |
| 4841  | GO:0006721          | terpenoid metabolic pro    | 0.55 | 1   | 0.105374075 | 29    | 0.083749674 |
| 11834 | GO:0019905          | syntaxin binding           | 0.55 | 1   | 0.105374075 | 29    | 0.083749674 |
| 3195  | GO:0004540          | ribonuclease activity      | 0.56 | 3   | 0.31612223  | 106   | 0.3061195   |
| 2999  | GO:0004312          | fatty acid synthase activ  | 0.56 | 2   | 0.21074815  | 68    | 0.19637854  |
| 32    | GO:0000041          | transition metal ion tran  | 0.56 | 2   | 0.21074815  | 68    | 0.19637854  |
| 12572 | GO:0022890 GO:0015  | inorganic cation transm    | 0.56 | 9   | 0.9483667   | 332   | 0.9587894   |
| 3009  | GO:0004322          | ferroxidase activity       | 0.57 | 1   | 0.105374075 | 30    | 0.086637594 |
| 3310  | GO:0004679          | AMP-activated protein f    | 0.57 | 1   | 0.105374075 | 30    | 0.086637594 |
| 3886  | GO:0005527          | macrolide binding          | 0.57 | 1   | 0.105374075 | 30    | 0.086637594 |
| 3887  | GO:0005528          | FK506 binding              | 0.57 | 1   | 0.105374075 | 30    | 0.086637594 |
| 4498  | GO:0006305          | DNA alkylation             | 0.57 | 1   | 0.105374075 | 30    | 0.086637594 |
| 4499  | GO:0006306          | DNA methylation            | 0.57 | 1   | 0.105374075 | 30    | 0.086637594 |
| 6216  | GO:0008810          | cellulase activity         | 0.57 | 1   | 0.105374075 | 30    | 0.086637594 |
| 9785  | GO:0016724          | oxidoreductase activity    | 0.57 | 1   | 0.105374075 | 30    | 0.086637594 |
| 12533 | GO:0022838          | substrate-specific chan    | 0.57 | 6   | 0.63224447  | 221   | 0.63823026  |
| 3620  | GO:0005057          | receptor signaling prote   | 0.57 | 2   | 0.21074815  | 69    | 0.19926646  |
| 11522 | GO:0019538 GO:0006  | protein metabolic proce    | 0.57 | 112 | 11.801897   | 4134  | 11.938661   |
| 3873  | GO:0005507          | copper ion binding         | 0.57 | 4   | 0.4214963   | 146   | 0.42163628  |
| 9486  | GO:0016298          | lipase activity            | 0.57 | 5   | 0.52687037  | 185   | 0.53426516  |
| 9191  | GO:0015931          | nucleobase, nucleoside     | 0.58 | 2   | 0.21074815  | 70    | 0.20215438  |
| 9192  | GO:0015932          | nucleobase, nucleoside     | 0.58 | 2   | 0.21074815  | 70    | 0.20215438  |
| 9796  | GO:0016741          | transferase activity, traf | 0.58 | 7   | 0.73761857  | 261   | 0.7537471   |
| 19590 | GO:0043295          | glutathione binding        | 0.58 | 1   | 0.105374075 | 31    | 0.08952551  |
| 20514 | GO:0044264          | cellular polysaccharide    | 0.58 | 1   | 0.105374075 | 31    | 0.08952551  |
| 4478  | GO:0006281          | DNA repair                 | 0.59 | 4   | 0.4214963   | 149   | 0.43030006  |
| 5037  | GO:0006974 GO:0034  | response to DNA dama       | 0.59 | 4   | 0.4214963   | 149   | 0.43030006  |
| 30877 | GO:0072521          | purine-containing comp     | 0.59 | 22  | 2.3182297   | 827   | 2.3883097   |
| 8660  | GO:0015267 GO:0015  | channel activity           | 0.59 | 6   | 0.63224447  | 226   | 0.6526699   |
| 12515 | GO:0022803          | passive transmembran       | 0.59 | 6   | 0.63224447  | 226   | 0.6526699   |
| 3190  | GO:0004532          | exoribonuclease activity   | 0.59 | 1   | 0.105374075 | 32    | 0.09241343  |
| 3717  | GO:0005199          | structural constituent of  | 0.59 | 1   | 0.105374075 | 32    | 0.09241343  |
| 4614  | GO:0006470          | protein dephosphorylat     | 0.59 | 1   | 0.105374075 | 32    | 0.09241343  |
| 6942  | GO:0009674          | potassium:sodium sym       | 0.59 | 1   | 0.105374075 | 32    | 0.09241343  |
| 9537  | GO:0016409          | palmitoyltransferase ac    | 0.59 | 1   | 0.105374075 | 32    | 0.09241343  |
| 9927  | GO:0016896          | exoribonuclease activity   | 0.59 | 1   | 0.105374075 | 32    | 0.09241343  |
| 12522 | GO:0022820          | potassium ion symporte     | 0.59 | 1   | 0.105374075 | 32    | 0.09241343  |
| 12833 | GO:0030275          | LRR domain binding         | 0.59 | 1   | 0.105374075 | 32    | 0.09241343  |
| 14381 | GO:0031968          | organelle outer membra     | 0.59 | 1   | 0.105374075 | 32    | 0.09241343  |
| 4459  | GO:0006259 GO:0055  | DNA metabolic process      | 0.60 | 13  | 1.369863    | 493   | 1.4237444   |
| 4526  | GO:0006351 GO:0006  | transcription, DNA-dep     | 0.60 | 42  | 4.425711    | 1575  | 4.548474    |
| 15176 | GO:0032774          | RNA biosynthetic proce     | 0.60 | 42  | 4.425711    | 1575  | 4.548474    |
| 4493  | GO:0006298 GO:0006  | mismatch repair            | 0.60 | 1   | 0.105374075 | 33    | 0.09530135  |
| 2632  | GO:0003682          | chromatin binding          | 0.60 | 1   | 0.105374075 | 33    | 0.09530135  |
| 3955  | GO:0005634          | nucleus                    | 0.61 | 38  | 4.004215    | 1433  | 4.138389    |
| 4497  | GO:0006304          | DNA modification           | 0.61 | 1   | 0.105374075 | 34    | 0.09818927  |
| 5270  | GO:0007264          | small GTPase mediated      | 0.61 | 1   | 0.105374075 | 34    | 0.09818927  |
| 5700  | GO:0008144          | drug binding               | 0.61 | 1   | 0.105374075 | 34    | 0.09818927  |
| 6004  | GO:0008536          | Ran GTPase binding         | 0.61 | 1   | 0.105374075 | 34    | 0.09818927  |
| 6072  | GO:0008645          | hexose transport           | 0.61 | 1   | 0.105374075 | 34    | 0.09818927  |
| 8562  | GO:0015149          | hexose transmembran        | 0.61 | 1   | 0.105374075 | 34    | 0.09818927  |
| 17794 | GO:0035428          | hexose transmembran        | 0.61 | 1   | 0.105374075 | 34    | 0.09818927  |
| 18382 | GO:0040029          | regulation of gene expr    | 0.61 | 1   | 0.105374075 | 34    | 0.09818927  |
| 6424  | GO:0009055 GO:0009  | electron carrier activity  | 0.61 | 4   | 0.4214963   | 154   | 0.44473964  |
| 2674  | GO:0003824          | catalytic activity         | 0.61 | 291 | 30.663857   | 10750 | 31.045137   |
| 9488  | GO:0016301          | kinase activity            | 0.62 | 46  | 4.8472075   | 1740  | 5.0249805   |
| 4538  | GO:0006364 GO:0006  | rRNA processing            | 0.62 | 1   | 0.105374075 | 35    | 0.10107719  |
| 9310  | GO:0016072          | rRNA metabolic proces      | 0.62 | 1   | 0.105374075 | 35    | 0.10107719  |
| 9480  | GO:0016289          | CoA hydrolase activity     | 0.62 | 1   | 0.105374075 | 35    | 0.10107719  |
| 9922  | GO:0016891          | endoribonuclease activ     | 0.62 | 1   | 0.105374075 | 35    | 0.10107719  |
| 9114  | GO:0015849          | organic acid transport     | 0.62 | 4   | 0.4214963   | 156   | 0.45051548  |
| 22443 | GO:0046942          | carboxylic acid transpo    | 0.62 | 4   | 0.4214963   | 156   | 0.45051548  |
| 5604  | GO:0008017          | microtubule binding        | 0.63 | 2   | 0.21074815  | 77    | 0.22236982  |
| 3877  | GO:0005516          | calmodulin binding         | 0.63 | 6   | 0.63224447  | 236   | 0.6815491   |
| 3888  | GO:0005529          | sugar binding              | 0.63 | 4   | 0.4214963   | 158   | 0.45629135  |
| 3804  | GO:0005345          | purine base transmemt      | 0.63 | 1   | 0.105374075 | 36    | 0.10396511  |
| 4949  | GO:0006863 GO:0015  | purine base transport      | 0.63 | 1   | 0.105374075 | 36    | 0.10396511  |
| 5902  | GO:0008408          | 3'-5' exonuclease activi   | 0.63 | 1   | 0.105374075 | 36    | 0.10396511  |
| 11314 | GO:0019321          | pentose metabolic proc     | 0.63 | 1   | 0.105374075 | 36    | 0.10396511  |
| 20649 | GO:0044455          | mitochondrial membra       | 0.63 | 1   | 0.105374075 | 36    | 0.10396511  |
| 30865 | GO:0072509          | divalent inorganic catio   | 0.63 | 2   | 0.21074815  | 78    | 0.22525774  |
| 5705  | GO:0008152          | metabolic process          | 0.64 | 473 | 49.841938   | 17432 | 50.34222    |
| 19831 | GO:0043565          | sequence-specific DNA      | 0.64 | 4   | 0.4214963   | 159   | 0.45917925  |
| 8934  | GO:0015662          | ATPase activity, couple    | 0.64 | 1   | 0.105374075 | 37    | 0.10685303  |



|       |                    |                            |      |     |             |      |             |
|-------|--------------------|----------------------------|------|-----|-------------|------|-------------|
| 3874  | GO:0005509         | calcium ion binding        | 0.65 | 7   | 0.73761857  | 279  | 0.8057296   |
| 9875  | GO:0016836         | hydro-lyase activity       | 0.65 | 2   | 0.21074815  | 80   | 0.2310336   |
| 9637  | GO:0016538 GO:0003 | cyclin-dependent protei    | 0.65 | 1   | 0.105374075 | 38   | 0.10974095  |
| 117   | GO:0000149         | SNARE binding              | 0.65 | 1   | 0.105374075 | 38   | 0.10974095  |
| 3827  | GO:0005372         | water transmembrane t      | 0.65 | 2   | 0.21074815  | 81   | 0.23392151  |
| 4927  | GO:0006833         | water transport            | 0.65 | 2   | 0.21074815  | 81   | 0.23392151  |
| 8652  | GO:0015250         | water channel activity     | 0.65 | 2   | 0.21074815  | 81   | 0.23392151  |
| 18429 | GO:0042044         | fluid transport            | 0.65 | 2   | 0.21074815  | 81   | 0.23392151  |
| 3260  | GO:0004620         | phospholipase activity     | 0.66 | 3   | 0.31612223  | 123  | 0.35521415  |
| 29202 | GO:0070838         | divalent metal ion trans   | 0.66 | 2   | 0.21074815  | 82   | 0.23680943  |
| 19473 | GO:0043170 GO:0043 | macromolecule metabo       | 0.66 | 175 | 18.440464   | 6553 | 18.92454    |
| 20488 | GO:0044238         | primary metabolic proc     | 0.66 | 246 | 25.922024   | 9167 | 26.47356    |
| 4476  | GO:0006278         | RNA-dependent DNA r        | 0.67 | 4   | 0.4214963   | 166  | 0.4793947   |
| 5891  | GO:0008395 GO:0008 | steroid hydroxylase act    | 0.67 | 1   | 0.105374075 | 40   | 0.1155168   |
| 8613  | GO:0015205 GO:0015 | nucleobase transmembr      | 0.67 | 1   | 0.105374075 | 40   | 0.1155168   |
| 9116  | GO:0015851         | nucleobase transport       | 0.67 | 1   | 0.105374075 | 40   | 0.1155168   |
| 9843  | GO:0016796         | exonuclease activity, ac   | 0.67 | 1   | 0.105374075 | 40   | 0.1155168   |
| 11804 | GO:0019867         | outer membrane             | 0.67 | 1   | 0.105374075 | 40   | 0.1155168   |
| 4643  | GO:0006511         | ubiquitin-dependent pro    | 0.67 | 2   | 0.21074815  | 84   | 0.24258527  |
| 11864 | GO:0019941         | modification-dependent     | 0.67 | 2   | 0.21074815  | 84   | 0.24258527  |
| 19898 | GO:0043632         | modification-dependent     | 0.67 | 2   | 0.21074815  | 84   | 0.24258527  |
| 20507 | GO:0044257         | cellular protein cataboli  | 0.67 | 2   | 0.21074815  | 84   | 0.24258527  |
| 25887 | GO:0051603         | proteolysis involved in c  | 0.67 | 2   | 0.21074815  | 84   | 0.24258527  |
| 30867 | GO:0072511         | divalent inorganic catio   | 0.67 | 2   | 0.21074815  | 84   | 0.24258527  |
| 26932 | GO:0055086         | nucleobase, nucleoside     | 0.68 | 24  | 2.5289779   | 944  | 2.7261963   |
| 20627 | GO:0044433         | cytoplasmic vesicle par    | 0.68 | 1   | 0.105374075 | 41   | 0.118404716 |
| 5661  | GO:0008092         | cytoskeletal protein bind  | 0.68 | 6   | 0.63224447  | 249  | 0.719092    |
| 5768  | GO:0008238         | exopeptidase activity      | 0.69 | 2   | 0.21074815  | 86   | 0.24836111  |
| 12734 | GO:0030163         | protein catabolic proces   | 0.69 | 2   | 0.21074815  | 86   | 0.24836111  |
| 20515 | GO:0044265 GO:0034 | cellular macromolecule     | 0.69 | 2   | 0.21074815  | 86   | 0.24836111  |
| 12805 | GO:0030246         | carbohydrate binding       | 0.69 | 6   | 0.63224447  | 251  | 0.7248679   |
| 3718  | GO:0005200         | structural constituent of  | 0.69 | 1   | 0.105374075 | 42   | 0.121292636 |
| 5033  | GO:0006970         | response to osmotic str    | 0.69 | 1   | 0.105374075 | 42   | 0.121292636 |
| 12659 | GO:0030076         | light-harvesting comple    | 0.69 | 1   | 0.105374075 | 42   | 0.121292636 |
| 18956 | GO:0042626         | ATPase activity, couple    | 0.69 | 5   | 0.52687037  | 211  | 0.6093511   |
| 4867  | GO:0006753         | nucleoside phosphate r     | 0.69 | 23  | 2.4236038   | 914  | 2.6395588   |
| 6484  | GO:0009117         | nucleotide metabolic pr    | 0.69 | 23  | 2.4236038   | 914  | 2.6395588   |
| 9861  | GO:0016820         | hydrolase activity, actin  | 0.69 | 5   | 0.52687037  | 212  | 0.612239    |
| 3156  | GO:0004497         | monooxygenase activit      | 0.70 | 4   | 0.4214963   | 172  | 0.49672222  |
| 5694  | GO:0008137         | NADH dehydrogenase         | 0.70 | 1   | 0.105374075 | 43   | 0.124180555 |
| 8589  | GO:0015179         | L-amino acid transmem      | 0.70 | 1   | 0.105374075 | 43   | 0.124180555 |
| 9076  | GO:0015807         | L-amino acid transport     | 0.70 | 1   | 0.105374075 | 43   | 0.124180555 |
| 13833 | GO:0031410         | cytoplasmic vesicle        | 0.70 | 1   | 0.105374075 | 43   | 0.124180555 |
| 14393 | GO:0031982         | vesicle                    | 0.70 | 1   | 0.105374075 | 43   | 0.124180555 |
| 20624 | GO:0044430         | cytoskeletal part          | 0.70 | 2   | 0.21074815  | 88   | 0.25413695  |
| 8495  | GO:0015077         | monovalent inorganic c     | 0.70 | 5   | 0.52687037  | 214  | 0.6180149   |
| 4605  | GO:0006457 GO:0007 | protein folding            | 0.70 | 4   | 0.4214963   | 173  | 0.49961013  |
| 15949 | GO:0033554         | cellular response to stre  | 0.70 | 4   | 0.4214963   | 173  | 0.49961013  |
| 9824  | GO:0016773         | phosphotransferase ac      | 0.70 | 38  | 4.004215    | 1493 | 4.311664    |
| 2982  | GO:0004197         | cysteine-type endopept     | 0.71 | 2   | 0.21074815  | 90   | 0.2599128   |
| 18953 | GO:0042623         | ATPase activity, couple    | 0.71 | 13  | 1.369863    | 537  | 1.550813    |
| 8787  | GO:0015450         | P-P-bond-hydrolysis-dr     | 0.71 | 1   | 0.105374075 | 45   | 0.1299564   |
| 9924  | GO:0016893         | endonuclease activity, d   | 0.71 | 1   | 0.105374075 | 45   | 0.1299564   |
| 11780 | GO:0019829         | cation-transporting ATP    | 0.71 | 1   | 0.105374075 | 45   | 0.1299564   |
| 24456 | GO:0050136         | NADH dehydrogenase         | 0.71 | 1   | 0.105374075 | 45   | 0.1299564   |
| 26845 | GO:0052689         | carboxylic ester hydroly   | 0.72 | 13  | 1.369863    | 538  | 1.5537009   |
| 3242  | GO:0004601 GO:0016 | peroxidase activity        | 0.72 | 3   | 0.31612223  | 135  | 0.38986918  |
| 9754  | GO:0016684         | oxidoreductase activity    | 0.72 | 3   | 0.31612223  | 135  | 0.38986918  |
| 8749  | GO:0015399         | primary active transmem    | 0.72 | 6   | 0.63224447  | 260  | 0.75085914  |
| 8753  | GO:0015405         | P-P-bond-hydrolysis-dr     | 0.72 | 6   | 0.63224447  | 260  | 0.75085914  |
| 4558  | GO:0006396 GO:0006 | RNA processing             | 0.72 | 5   | 0.52687037  | 219  | 0.63245445  |
| 12498 | GO:0022613         | ribonucleoprotein comp     | 0.72 | 1   | 0.105374075 | 46   | 0.13284431  |
| 18614 | GO:0042254 GO:0007 | ribosome biogenesis        | 0.72 | 1   | 0.105374075 | 46   | 0.13284431  |
| 31895 | GO:0090304         | nucleic acid metabolic r   | 0.72 | 60  | 6.322445    | 2340 | 6.7577324   |
| 5714  | GO:0008170         | N-methyltransferase ac     | 0.73 | 1   | 0.105374075 | 47   | 0.13573223  |
| 8497  | GO:0015079 GO:0022 | potassium ion transmem     | 0.73 | 1   | 0.105374075 | 47   | 0.13573223  |
| 9308  | GO:0016070         | RNA metabolic process      | 0.73 | 47  | 4.952582    | 1855 | 5.3570914   |
| 9823  | GO:0016772         | transferase activity, tran | 0.73 | 49  | 5.1633296   | 1932 | 5.579461    |
| 14591 | GO:0032183         | SUMO binding               | 0.74 | 1   | 0.105374075 | 48   | 0.13862015  |
| 4460  | GO:0006260 GO:0055 | DNA replication            | 0.74 | 5   | 0.52687037  | 224  | 0.64689404  |
| 6483  | GO:0009116         | nucleoside metabolic p     | 0.74 | 1   | 0.105374075 | 49   | 0.14150807  |
| 6750  | GO:0009415         | response to water          | 0.74 | 1   | 0.105374075 | 49   | 0.14150807  |
| 8909  | GO:0015630         | microtubule cytoskeleto    | 0.74 | 1   | 0.105374075 | 49   | 0.14150807  |
| 11784 | GO:0019838         | growth factor binding      | 0.74 | 1   | 0.105374075 | 49   | 0.14150807  |
| 3185  | GO:0004527 GO:0008 | exonuclease activity       | 0.75 | 1   | 0.105374075 | 50   | 0.14439599  |
| 4216  | GO:0005976         | polysaccharide metabo      | 0.75 | 1   | 0.105374075 | 50   | 0.14439599  |
| 9993  | GO:0017016         | Ras GTPase binding         | 0.75 | 1   | 0.105374075 | 50   | 0.14439599  |
| 29674 | GO:0071310         | cellular response to org   | 0.75 | 1   | 0.105374075 | 50   | 0.14439599  |
| 30886 | GO:0072530         | purine-containing comp     | 0.75 | 1   | 0.105374075 | 50   | 0.14439599  |
| 3293  | GO:0004659         | prenyltransferase activi   | 0.76 | 1   | 0.105374075 | 51   | 0.14728391  |
| 8908  | GO:0015629         | actin cytoskeleton         | 0.76 | 1   | 0.105374075 | 51   | 0.14728391  |
| 30207 | GO:0071843         | cellular component biog    | 0.76 | 1   | 0.105374075 | 51   | 0.14728391  |
| 2628  | GO:0003677         | DNA binding                | 0.76 | 30  | 3.1612225   | 1224 | 3.534814    |
| 15436 | GO:0033036         | macromolecule localiza     | 0.76 | 9   | 0.9483667   | 397  | 1.1465042   |
| 4915  | GO:0006817         | phosphate transport        | 0.76 | 1   | 0.105374075 | 52   | 0.15017183  |
| 8528  | GO:0015114         | phosphate transmembr       | 0.76 | 1   | 0.105374075 | 52   | 0.15017183  |
| 17801 | GO:0035435         | phosphate transmembr       | 0.76 | 1   | 0.105374075 | 52   | 0.15017183  |
| 2809  | GO:0003993         | acid phosphatase activi    | 0.76 | 1   | 0.105374075 | 52   | 0.15017183  |
| 2778  | GO:0003954         | NADH dehydrogenase         | 0.77 | 1   | 0.105374075 | 53   | 0.15305975  |
| 19758 | GO:0043492         | ATPase activity, couple    | 0.77 | 5   | 0.52687037  | 235  | 0.67866117  |
| 17918 | GO:0035556 GO:0007 | intracellular signal trans | 0.78 | 1   | 0.105374075 | 54   | 0.15594767  |
| 29251 | GO:0070887         | cellular response to che   | 0.78 | 1   | 0.105374075 | 54   | 0.15594767  |
| 11828 | GO:0019899         | enzyme binding             | 0.78 | 5   | 0.52687037  | 237  | 0.684437    |
| 4029  | GO:0005740         | mitochondrial envelope     | 0.79 | 3   | 0.31612223  | 151  | 0.4360759   |
| 13697 | GO:0031267         | small GTPase binding       | 0.79 | 1   | 0.105374075 | 56   | 0.16172351  |
| 6426  | GO:0009057 GO:0043 | macromolecule catabol      | 0.79 | 2   | 0.21074815  | 106  | 0.3061195   |
| 7557  | GO:0010333         | terpene synthase activi    | 0.80 | 1   | 0.105374075 | 57   | 0.16461143  |
| 8910  | GO:0015631         | tubulin binding            | 0.80 | 2   | 0.21074815  | 107  | 0.30900744  |
| 4357  | GO:0006139 GO:0055 | nucleobase, nucleoside     | 0.80 | 83  | 8.746049    | 3285 | 9.486816    |
| 3323  | GO:0004702         | receptor signaling prote   | 0.80 | 1   | 0.105374075 | 58   | 0.16749935  |
| 5819  | GO:0008299 GO:0009 | isoprenoid biosynthetic    | 0.80 | 1   | 0.105374075 | 58   | 0.16749935  |
| 8558  | GO:0015145         | monosaccharide transp      | 0.80 | 1   | 0.105374075 | 58   | 0.16749935  |
| 9018  | GO:0015749         | monosaccharide transp      | 0.80 | 1   | 0.105374075 | 58   | 0.16749935  |



|       |                        |                                              |      |     |             |      |            |
|-------|------------------------|----------------------------------------------|------|-----|-------------|------|------------|
| 11820 | GO:0019887             | protein kinase regulator                     | 0.80 | 1   | 0.105374075 | 58   | 0.16749935 |
| 3946  | GO:0005623             | cell                                         | 0.80 | 215 | 22.655426   | 8227 | 23.758917  |
| 20657 | GO:0044464             | cell part                                    | 0.80 | 215 | 22.655426   | 8227 | 23.758917  |
| 5909  | GO:0008415             | acyltransferase activity                     | 0.80 | 7   | 0.73761857  | 330  | 0.95301354 |
| 11833 | GO:0019904             | protein domain specific                      | 0.80 | 2   | 0.21074815  | 109  | 0.31478328 |
| 30700 | GO:0072341             | modified amino acid binding                  | 0.81 | 1   | 0.105374075 | 59   | 0.17038727 |
| 4840  | GO:0006720(GO:0016000) | isoprenoid metabolic process                 | 0.81 | 1   | 0.105374075 | 60   | 0.17327519 |
| 5652  | GO:0008081(GO:0004429) | phosphoric diester hydrolysis                | 0.81 | 1   | 0.105374075 | 60   | 0.17327519 |
| 14811 | GO:0032403             | protein complex binding                      | 0.81 | 1   | 0.105374075 | 60   | 0.17327519 |
| 25319 | GO:0051020             | GTPase binding                               | 0.81 | 1   | 0.105374075 | 60   | 0.17327519 |
| 29918 | GO:0071554             | cell wall organization or biogenesis         | 0.82 | 2   | 0.21074815  | 112  | 0.32344702 |
| 4768  | GO:0006644             | phospholipid metabolic process               | 0.82 | 1   | 0.105374075 | 61   | 0.1761631  |
| 2818  | GO:0004003             | ATP-dependent DNA helicase activity          | 0.82 | 1   | 0.105374075 | 61   | 0.1761631  |
| 8496  | GO:0015078             | hydrogen ion transmembrane transport         | 0.82 | 3   | 0.31612223  | 160  | 0.4620672  |
| 6018  | GO:0008559(GO:0005200) | xenobiotic-transporting activity             | 0.82 | 1   | 0.105374075 | 62   | 0.17905103 |
| 11210 | GO:0019207             | kinase regulator activity                    | 0.82 | 1   | 0.105374075 | 62   | 0.17905103 |
| 19225 | GO:0042908             | xenobiotic transport                         | 0.82 | 1   | 0.105374075 | 62   | 0.17905103 |
| 19227 | GO:0042910             | xenobiotic transporter activity              | 0.82 | 1   | 0.105374075 | 62   | 0.17905103 |
| 14379 | GO:0031966             | mitochondrial membrane organization          | 0.82 | 2   | 0.21074815  | 114  | 0.32922286 |
| 3103  | GO:0004437             | inositol or phosphatidylinositol binding     | 0.83 | 1   | 0.105374075 | 64   | 0.18482687 |
| 20623 | GO:0044429             | mitochondrial part                           | 0.83 | 3   | 0.31612223  | 165  | 0.47650677 |
| 9838  | GO:0016790             | thiolester hydrolase activity                | 0.84 | 1   | 0.105374075 | 65   | 0.18771479 |
| 11616 | GO:0019637             | organophosphate metabolism                   | 0.84 | 1   | 0.105374075 | 65   | 0.18771479 |
| 19526 | GO:0043227             | membrane-bounded organelle                   | 0.84 | 52  | 5.479452    | 2142 | 6.185924   |
| 19530 | GO:0043231             | intracellular membrane-bounded organelle     | 0.84 | 52  | 5.479452    | 2142 | 6.185924   |
| 25416 | GO:0051119             | sugar transmembrane transport                | 0.84 | 2   | 0.21074815  | 118  | 0.34077454 |
| 5809  | GO:0008289             | lipid binding                                | 0.84 | 5   | 0.52687037  | 258  | 0.74508333 |
| 2629  | GO:0003678(GO:0003678) | DNA helicase activity                        | 0.84 | 1   | 0.105374075 | 67   | 0.19349062 |
| 17024 | GO:0034645(GO:0034645) | cellular macromolecule biosynthesis          | 0.85 | 48  | 5.0579557   | 1999 | 5.7729516  |
| 18955 | GO:0042625             | ATPase activity, coupled                     | 0.85 | 1   | 0.105374075 | 68   | 0.19637854 |
| 6884  | GO:0009607             | response to biotic stimulus                  | 0.85 | 2   | 0.21074815  | 122  | 0.3523262  |
| 6428  | GO:0009059(GO:0043200) | macromolecule biosynthesis                   | 0.85 | 48  | 5.0579557   | 2003 | 5.7845035  |
| 5726  | GO:0008187             | poly-pyrimidine tract binding                | 0.86 | 1   | 0.105374075 | 70   | 0.20215438 |
| 5788  | GO:0008266             | poly(U) RNA binding                          | 0.86 | 1   | 0.105374075 | 70   | 0.20215438 |
| 5838  | GO:0008320             | protein transmembrane transport              | 0.86 | 1   | 0.105374075 | 70   | 0.20215438 |
| 9853  | GO:0016811             | hydrolase activity, acting on ester bonds    | 0.86 | 1   | 0.105374075 | 70   | 0.20215438 |
| 12568 | GO:0022884             | macromolecule transmembrane transport        | 0.86 | 1   | 0.105374075 | 70   | 0.20215438 |
| 23522 | GO:0048046             | apoplast                                     | 0.86 | 1   | 0.105374075 | 70   | 0.20215438 |
| 2649  | GO:0003713             | transcription coactivator activity           | 0.86 | 1   | 0.105374075 | 70   | 0.20215438 |
| 4067  | GO:0005783             | endoplasmic reticulum                        | 0.86 | 3   | 0.31612223  | 174  | 0.50249803 |
| 3200  | GO:0004553(GO:0016000) | hydrolase activity, hydrolyzing ester bonds  | 0.86 | 6   | 0.63224447  | 312  | 0.90103096 |
| 7691  | GO:0010467             | gene expression                              | 0.86 | 47  | 4.952582    | 1974 | 5.7007537  |
| 9845  | GO:0016798             | hydrolase activity, acting on ether bonds    | 0.86 | 8   | 0.8429926   | 401  | 1.1580559  |
| 9771  | GO:0016709             | oxidoreductase activity, acting on NADPH     | 0.86 | 1   | 0.105374075 | 71   | 0.2050423  |
| 9869  | GO:0016829             | lyase activity                               | 0.86 | 10  | 1.0537407   | 488  | 1.4093049  |
| 4121  | GO:0005856             | cytoskeleton                                 | 0.86 | 2   | 0.21074815  | 126  | 0.3638779  |
| 20531 | GO:0044281             | small molecule metabolic process             | 0.87 | 42  | 4.425711    | 1788 | 5.1636004  |
| 3311  | GO:0004683(GO:0004683) | calmodulin-dependent protein kinase activity | 0.87 | 1   | 0.105374075 | 74   | 0.21370606 |
| 4394  | GO:0006184             | GTP catabolic process                        | 0.88 | 2   | 0.21074815  | 132  | 0.3812054  |
| 21605 | GO:0046039             | GTP metabolic process                        | 0.88 | 2   | 0.21074815  | 132  | 0.3812054  |
| 2758  | GO:0003924             | GTPase activity                              | 0.88 | 2   | 0.21074815  | 132  | 0.3812054  |
| 6529  | GO:0009165             | nucleotide biosynthetic process              | 0.88 | 1   | 0.105374075 | 77   | 0.22236982 |
| 9877  | GO:0016838             | carbon-oxygen lyase activity                 | 0.88 | 1   | 0.105374075 | 77   | 0.22236982 |
| 9852  | GO:0016810             | hydrolase activity, acting on ester bonds    | 0.89 | 2   | 0.21074815  | 134  | 0.38698125 |
| 5196  | GO:0007166             | cell surface receptor-linked signaling       | 0.89 | 1   | 0.105374075 | 78   | 0.22525774 |
| 3903  | GO:0005575(GO:0008000) | cellular component                           | 0.89 | 218 | 22.971548   | 8515 | 24.590637  |
| 22007 | GO:0046483             | heterocycle metabolic process                | 0.89 | 214 | 2.528979    | 1094 | 3.1593843  |
| 9682  | GO:0016597             | amino acid binding                           | 0.89 | 1   | 0.105374075 | 80   | 0.2310336  |
| 19479 | GO:0043176             | amine binding                                | 0.89 | 1   | 0.105374075 | 80   | 0.2310336  |
| 15189 | GO:0032787             | monocarboxylic acid metabolism               | 0.89 | 1   | 0.105374075 | 81   | 0.23392151 |
| 18674 | GO:0042325             | regulation of phosphorylation                | 0.89 | 1   | 0.105374075 | 81   | 0.23392151 |
| 4942  | GO:0006855             | drug transmembrane transport                 | 0.90 | 2   | 0.21074815  | 139  | 0.40142086 |
| 8642  | GO:0015238(GO:0015238) | drug transmembrane transport                 | 0.90 | 2   | 0.21074815  | 139  | 0.40142086 |
| 9154  | GO:0015893             | drug transport                               | 0.90 | 2   | 0.21074815  | 139  | 0.40142086 |
| 18832 | GO:0042493(GO:0017000) | response to drug                             | 0.90 | 2   | 0.21074815  | 139  | 0.40142086 |
| 2658  | GO:0003729             | mRNA binding                                 | 0.90 | 1   | 0.105374075 | 82   | 0.23680943 |
| 3895  | GO:0005543             | phospholipid binding                         | 0.90 | 2   | 0.21074815  | 140  | 0.40430877 |
| 6046  | GO:0008610             | lipid biosynthetic process                   | 0.90 | 2   | 0.21074815  | 141  | 0.4071967  |
| 22479 | GO:0046983             | protein dimerization activity                | 0.90 | 10  | 1.0537407   | 517  | 1.4930545  |
| 8557  | GO:0015144             | carbohydrate transmembrane transport         | 0.91 | 2   | 0.21074815  | 143  | 0.41297254 |
| 16602 | GO:0034219             | carbohydrate transmembrane transport         | 0.91 | 2   | 0.21074815  | 143  | 0.41297254 |
| 11222 | GO:0019220             | regulation of phosphorylation                | 0.91 | 1   | 0.105374075 | 85   | 0.24547319 |
| 25471 | GO:0051174             | regulation of phosphorylation                | 0.91 | 1   | 0.105374075 | 85   | 0.24547319 |
| 4032  | GO:0005743             | mitochondrial inner membrane                 | 0.91 | 1   | 0.105374075 | 88   | 0.25413695 |
| 6071  | GO:0008643(GO:0006000) | carbohydrate transport                       | 0.91 | 2   | 0.21074815  | 147  | 0.42452422 |
| 14380 | GO:0031967             | organelle envelope                           | 0.92 | 3   | 0.31612223  | 201  | 0.5804719  |
| 9874  | GO:0016835             | carbon-oxygen lyase activity                 | 0.92 | 3   | 0.31612223  | 202  | 0.5833598  |
| 11426 | GO:0019438             | aromatic compound biosynthesis               | 0.92 | 2   | 0.21074815  | 149  | 0.43030006 |
| 14590 | GO:0032182             | small conjugating protein                    | 0.92 | 1   | 0.105374075 | 90   | 0.2599128  |
| 3644  | GO:0005102             | receptor binding                             | 0.92 | 1   | 0.105374075 | 91   | 0.2628007  |
| 14387 | GO:0031975             | envelope                                     | 0.92 | 3   | 0.31612223  | 205  | 0.59202355 |
| 16785 | GO:0034404             | nucleobase, nucleoside, nucleotide           | 0.92 | 1   | 0.105374075 | 92   | 0.26568863 |
| 17033 | GO:0034654             | nucleobase, nucleoside, nucleotide           | 0.92 | 1   | 0.105374075 | 92   | 0.26568863 |
| 20336 | GO:0044085             | cellular component biosynthesis              | 0.92 | 1   | 0.105374075 | 93   | 0.26857653 |
| 3808  | GO:0005351(GO:0005351) | sugar:hydrogen symporter                     | 0.93 | 1   | 0.105374075 | 94   | 0.27146447 |
| 3835  | GO:0005402             | cation:sugar symporter                       | 0.93 | 1   | 0.105374075 | 94   | 0.27146447 |
| 11803 | GO:0019866             | organelle inner membrane                     | 0.93 | 1   | 0.105374075 | 94   | 0.27146447 |
| 3178  | GO:0004519             | endonuclease activity                        | 0.93 | 6   | 0.63224447  | 356  | 1.0280994  |
| 4906  | GO:0006807             | nitrogen compound metabolism                 | 0.93 | 89  | 9.378293    | 3725 | 10.757502  |
| 4612  | GO:0006468             | protein phosphorylation                      | 0.93 | 50  | 5.268704    | 2205 | 6.367863   |
| 19126 | GO:0042803             | protein homodimerization activity            | 0.93 | 4   | 0.4214963   | 265  | 0.7652988  |
| 8677  | GO:0015295             | solute:hydrogen symporter                    | 0.93 | 1   | 0.105374075 | 98   | 0.28301615 |
| 13829 | GO:0031406             | carboxylic acid binding                      | 0.93 | 1   | 0.105374075 | 98   | 0.28301615 |
| 16851 | GO:0034470             | ncRNA processing                             | 0.94 | 1   | 0.105374075 | 99   | 0.28590405 |
| 17039 | GO:0034660             | ncRNA metabolic process                      | 0.94 | 1   | 0.105374075 | 99   | 0.28590405 |
| 13041 | GO:0030554             | adenyl nucleotide binding                    | 0.94 | 10  | 1.0537407   | 550  | 1.5883559  |
| 14965 | GO:0032559             | adenyl ribonucleotide binding                | 0.94 | 10  | 1.0537407   | 550  | 1.5883559  |
| 9870  | GO:0016830             | carbon-carbon lyase activity                 | 0.94 | 2   | 0.21074815  | 161  | 0.4649551  |
| 7271  | GO:0010033             | response to organic substance                | 0.94 | 1   | 0.105374075 | 100  | 0.28879198 |
| 16430 | GO:0034046             | poly(G) RNA binding                          | 0.94 | 1   | 0.105374075 | 100  | 0.28879198 |
| 17020 | GO:0034641             | cellular nitrogen compound metabolic process | 0.94 | 87  | 9.167544    | 3678 | 10.621769  |
| 5764  | GO:0008234(GO:0004000) | cysteine-type peptidase activity             | 0.94 | 2   | 0.21074815  | 163  | 0.47073093 |
| 4028  | GO:0005739             | mitochondrion                                | 0.94 | 3   | 0.31612223  | 219  | 0.63245445 |

|       |                       |                                              |      |     |             |       |            |
|-------|-----------------------|----------------------------------------------|------|-----|-------------|-------|------------|
| 19125 | GO:0042802            | identical protein binding                    | 0.95 | 13  | 1.369863    | 697   | 2.01288    |
| 4649  | GO:0006520 GO:0006915 | cellular amino acid metabolism               | 0.95 | 4   | 0.4214963   | 277   | 0.7999538  |
| 9494  | GO:0016311            | dephosphorylation                            | 0.95 | 7   | 0.73761857  | 425   | 1.227366   |
| 6077  | GO:0008652            | cellular amino acid biosynthesis             | 0.95 | 2   | 0.21074815  | 169   | 0.48805845 |
| 3177  | GO:0004518            | nuclease activity                            | 0.95 | 7   | 0.73761857  | 427   | 1.2331418  |
| 3884  | GO:0005524            | ATP binding                                  | 0.95 | 9   | 0.9483667   | 524   | 1.51327    |
| 9839  | GO:0016791 GO:0016792 | phosphatase activity                         | 0.95 | 6   | 0.63224447  | 383   | 1.1060733  |
| 13531 | GO:0031072            | heat shock protein binding                   | 0.95 | 3   | 0.31612223  | 230   | 0.6642216  |
| 9493  | GO:0016310            | phosphorylation                              | 0.96 | 56  | 5.9009485   | 2504  | 7.2313514  |
| 29081 | GO:0070717            | poly-purine tract binding                    | 0.96 | 1   | 0.105374075 | 112   | 0.32344702 |
| 4850  | GO:0006732 GO:0006915 | coenzyme metabolic process                   | 0.96 | 1   | 0.105374075 | 113   | 0.32633495 |
| 19686 | GO:0043414            | macromolecule methylation                    | 0.96 | 1   | 0.105374075 | 113   | 0.32633495 |
| 3904  | GO:0005576            | extracellular region                         | 0.96 | 2   | 0.21074815  | 178   | 0.5140497  |
| 13082 | GO:0030599            | pectinesterase activity                      | 0.96 | 2   | 0.21074815  | 178   | 0.5140497  |
| 9837  | GO:0016788            | hydrolase activity, acting on esters         | 0.96 | 32  | 3.3719704   | 1534  | 4.430069   |
| 6020  | GO:0008565 GO:0015498 | protein transporter activity                 | 0.96 | 1   | 0.105374075 | 115   | 0.3321108  |
| 9871  | GO:0016831            | carboxy-lyase activity                       | 0.96 | 1   | 0.105374075 | 115   | 0.3321108  |
| 6663  | GO:0009309            | amine biosynthetic process                   | 0.96 | 2   | 0.21074815  | 181   | 0.5227135  |
| 18912 | GO:0042578            | phosphoric ester hydrolysis                  | 0.96 | 7   | 0.73761857  | 444   | 1.2822365  |
| 20505 | GO:0044255            | cellular lipid metabolic process             | 0.96 | 2   | 0.21074815  | 184   | 0.53137726 |
| 4844  | GO:0006725            | cellular aromatic compound metabolic process | 0.96 | 2   | 0.21074815  | 185   | 0.53426516 |
| 3885  | GO:0005525            | GTP binding                                  | 0.97 | 3   | 0.31612223  | 245   | 0.70754033 |
| 11032 | GO:0019001            | guanyl nucleotide binding                    | 0.97 | 3   | 0.31612223  | 245   | 0.70754033 |
| 14967 | GO:0032561            | guanyl ribonucleotide binding                | 0.97 | 3   | 0.31612223  | 245   | 0.70754033 |
| 2657  | GO:0003727 GO:0003728 | single-stranded RNA binding                  | 0.97 | 2   | 0.21074815  | 188   | 0.54292893 |
| 20356 | GO:0044106            | cellular amine metabolic process             | 0.97 | 4   | 0.4214963   | 303   | 0.8750397  |
| 9889  | GO:0016853            | isomerase activity                           | 0.97 | 4   | 0.4214963   | 306   | 0.8837035  |
| 12741 | GO:0030170            | pyridoxal phosphate binding                  | 0.97 | 1   | 0.105374075 | 126   | 0.3638779  |
| 28643 | GO:0070279            | vitamin B6 binding                           | 0.97 | 1   | 0.105374075 | 126   | 0.3638779  |
| 634   | GO:0000988            | protein binding transcription factor         | 0.97 | 1   | 0.105374075 | 126   | 0.3638779  |
| 635   | GO:0000989            | transcription factor binding                 | 0.97 | 1   | 0.105374075 | 126   | 0.3638779  |
| 2648  | GO:0003712            | transcription cofactor activity              | 0.97 | 1   | 0.105374075 | 126   | 0.3638779  |
| 6662  | GO:0009308            | amine metabolic process                      | 0.97 | 4   | 0.4214963   | 314   | 0.9068068  |
| 19533 | GO:0043234            | protein complex                              | 0.97 | 15  | 1.5806112   | 848   | 2.448956   |
| 20499 | GO:0044249            | cellular biosynthetic process                | 0.98 | 57  | 6.0063224   | 2635  | 7.6096687  |
| 9836  | GO:0016787            | hydrolase activity                           | 0.98 | 84  | 8.851422    | 3723  | 10.751725  |
| 3449  | GO:0004842 GO:0004843 | ubiquitin-protein ligase activity            | 0.98 | 4   | 0.4214963   | 326   | 0.94146186 |
| 18582 | GO:0042221            | response to chemical stimulus                | 0.98 | 4   | 0.4214963   | 328   | 0.94723773 |
| 9295  | GO:0016053            | organic acid biosynthesis                    | 0.98 | 2   | 0.21074815  | 211   | 0.6093511  |
| 21922 | GO:0046394            | carboxylic acid biosynthesis                 | 0.98 | 2   | 0.21074815  | 211   | 0.6093511  |
| 9654  | GO:0016567            | protein ubiquitination                       | 0.98 | 4   | 0.4214963   | 332   | 0.9587894  |
| 14854 | GO:0032446            | protein modification by phosphorylation      | 0.98 | 4   | 0.4214963   | 332   | 0.9587894  |
| 29011 | GO:0070647            | protein modification by phosphorylation      | 0.98 | 4   | 0.4214963   | 332   | 0.9587894  |
| 3716  | GO:0005198            | structural molecule activity                 | 0.98 | 5   | 0.52687037  | 393   | 1.1349525  |
| 11747 | GO:0019787 GO:0008954 | small conjugating protein                    | 0.98 | 4   | 0.4214963   | 339   | 0.9790048  |
| 4897  | GO:0006793            | phosphorus metabolic process                 | 0.98 | 63  | 6.638567    | 2925  | 8.4471655  |
| 4900  | GO:0006796            | phosphate metabolic process                  | 0.98 | 63  | 6.638567    | 2925  | 8.4471655  |
| 5019  | GO:0006952 GO:0002252 | defense response                             | 0.98 | 2   | 0.21074815  | 221   | 0.63823026 |
| 14959 | GO:0032553            | ribonucleotide binding                       | 0.99 | 13  | 1.369863    | 795   | 2.2958963  |
| 14961 | GO:0032555            | purine ribonucleotide binding                | 0.99 | 13  | 1.369863    | 795   | 2.2958963  |
| 10033 | GO:0017076            | purine nucleotide binding                    | 0.99 | 13  | 1.369863    | 797   | 2.3016722  |
| 13547 | GO:0031090            | organelle membrane                           | 0.99 | 2   | 0.21074815  | 224   | 0.64689404 |
| 14386 | GO:0031974            | membrane-enclosed lumen                      | 0.99 | 1   | 0.105374075 | 154   | 0.44473964 |
| 4609  | GO:0006464            | protein modification by phosphorylation      | 0.99 | 59  | 6.2170706   | 2781  | 8.031305   |
| 6427  | GO:0009058            | biosynthetic process                         | 0.99 | 59  | 6.2170706   | 2796  | 8.074624   |
| 18000 | GO:0035639            | purine ribonucleoside triphosphate binding   | 0.99 | 12  | 1.2644889   | 769   | 2.2208104  |
| 25483 | GO:0051186            | cofactor metabolic process                   | 0.99 | 1   | 0.105374075 | 164   | 0.47361887 |
| 4320  | GO:0006082            | organic acid metabolic process               | 0.99 | 4   | 0.4214963   | 369   | 1.0656425  |
| 11716 | GO:0019752            | carboxylic acid metabolic process            | 0.99 | 4   | 0.4214963   | 369   | 1.0656425  |
| 19707 | GO:0043436            | oxoacid metabolic process                    | 0.99 | 4   | 0.4214963   | 369   | 1.0656425  |
| 2660  | GO:0003735 GO:0003736 | structural constituent of ribosome           | 0.99 | 2   | 0.21074815  | 246   | 0.7104283  |
| 131   | GO:0000166            | nucleotide binding                           | 0.99 | 21  | 2.2128556   | 1213  | 3.5030468  |
| 18541 | GO:0042180            | cellular ketone metabolism                   | 0.99 | 4   | 0.4214963   | 375   | 1.0829699  |
| 11787 | GO:0019842            | vitamin binding                              | 0.99 | 1   | 0.105374075 | 177   | 0.5111618  |
| 9906  | GO:0016874            | ligase activity                              | 0.99 | 8   | 0.8429926   | 597   | 1.7240882  |
| 19684 | GO:0043412            | macromolecule modification                   | 0.99 | 60  | 6.322445    | 2900  | 8.374968   |
| 20510 | GO:0044260 GO:0034959 | cellular macromolecule metabolic process     | 0.99 | 126 | 13.277134   | 5577  | 16.105928  |
| 5610  | GO:0008026            | ATP-dependent helicase activity              | 0.99 | 1   | 0.105374075 | 183   | 0.52848935 |
| 28401 | GO:0070035            | purine NTP-dependent helicase activity       | 0.99 | 1   | 0.105374075 | 183   | 0.52848935 |
| 8466  | GO:0015031 GO:0015032 | protein transport                            | 0.99 | 1   | 0.105374075 | 185   | 0.53426516 |
| 20820 | GO:0045184            | establishment of protein transport           | 0.99 | 1   | 0.105374075 | 185   | 0.53426516 |
| 9913  | GO:0016881            | acid-amino acid ligase activity              | 0.99 | 4   | 0.4214963   | 391   | 1.1291766  |
| 3068  | GO:0004386            | helicase activity                            | 0.99 | 1   | 0.105374075 | 189   | 0.54581684 |
| 5669  | GO:0008104            | protein localization                         | 0.99 | 1   | 0.105374075 | 189   | 0.54581684 |
| 9911  | GO:0016879            | ligase activity, forming diphosphate         | 1.00 | 5   | 0.52687037  | 456   | 1.3168914  |
| 3340  | GO:0004721            | phosphoprotein phosphorylation               | 1.00 | 1   | 0.105374075 | 199   | 0.57469606 |
| 20533 | GO:0044283            | small molecule biosynthesis                  | 1.00 | 3   | 0.31612223  | 347   | 1.0021082  |
| 2626  | GO:0003674 GO:0003675 | molecular function                           | 1.00 | 630 | 66.385666   | 24394 | 70.447914  |
| 30204 | GO:0071840            | cellular component organization              | 1.00 | 3   | 0.31612223  | 362   | 1.045427   |
| 19525 | GO:0043226            | organelle                                    | 1.00 | 60  | 6.322445    | 3013  | 8.701303   |
| 19528 | GO:0043229            | intracellular organelle                      | 1.00 | 60  | 6.322445    | 3013  | 8.701303   |
| 20517 | GO:0044267            | cellular protein metabolism                  | 1.00 | 65  | 6.849315    | 3225  | 9.313541   |
| 20521 | GO:0044271            | cellular nitrogen compound metabolic process | 1.00 | 3   | 0.31612223  | 367   | 1.0598665  |
| 7229  | GO:0009987 GO:0008954 | cellular process                             | 1.00 | 250 | 26.34352    | 10601 | 30.614838  |
| 20487 | GO:0044237            | cellular metabolic process                   | 1.00 | 185 | 19.494204   | 8185  | 23.637625  |
| 30205 | GO:0071841            | cellular component organization              | 1.00 | 1   | 0.105374075 | 285   | 0.8230572  |
| 20618 | GO:0044424            | intracellular part                           | 1.00 | 75  | 7.9030557   | 3853  | 11.127155  |
| 3876  | GO:0005515 GO:0045353 | protein binding                              | 1.00 | 147 | 15.489989   | 6933  | 20.021948  |
| 20640 | GO:0044446            | intracellular organelle part                 | 1.00 | 6   | 0.63224447  | 710   | 2.0504231  |
| 20616 | GO:0044422            | organelle part                               | 1.00 | 6   | 0.63224447  | 712   | 2.0561988  |
| 3945  | GO:0005622            | intracellular                                | 1.00 | 92  | 9.694415    | 4751  | 13.720507  |
| 2627  | GO:0003676            | nucleic acid binding                         | 1.00 | 39  | 4.109589    | 2453  | 7.0840673  |
| 4109  | GO:0005840 GO:0033063 | ribosome                                     | 1.00 | 5   | 0.52687037  | 682   | 1.9695613  |
| 20638 | GO:0044444            | cytoplasmic part                             | 1.00 | 21  | 2.2128556   | 1644  | 4.7477403  |
| 13018 | GO:0030529            | ribonucleoprotein complex                    | 1.00 | 5   | 0.52687037  | 741   | 2.1399486  |
| 15392 | GO:0032991            | macromolecular complex                       | 1.00 | 20  | 2.1074815   | 1616  | 4.666878   |
| 19527 | GO:0043228            | non-membrane-bound organelle                 | 1.00 | 7   | 0.73761857  | 923   | 2.66555    |
| 19531 | GO:0043232            | intracellular non-membrane-bound organelle   | 1.00 | 7   | 0.73761857  | 923   | 2.66555    |
| 4027  | GO:0005737            | cytoplasm                                    | 1.00 | 25  | 2.634352    | 2001  | 5.7787275  |
| 3863  | GO:0005488            | binding                                      | 1.00 | 308 | 32.455215   | 13903 | 40.15075   |
| 2653  | GO:0003723            | RNA binding                                  | 1.00 | 3   | 0.31612223  | 797   | 2.3016722  |



| GO ID | GO ACCESSION      | GO Term                 | p-value | Count in Selection | % Count in Selection | Count in Total | % Count in Total |
|-------|-------------------|-------------------------|---------|--------------------|----------------------|----------------|------------------|
| 5704  | GO:0008150 GO:000 | biological_process      | 0.00    | 922                | 71.806854            | 22215          | 64.155136        |
| 2674  | GO:0003824        | catalytic activity      | 0.00    | 474                | 36.91589             | 10750          | 31.045137        |
| 4612  | GO:0006468        | protein phosphorylat    | 0.00    | 123                | 9.579439             | 2205           | 6.367863         |
| 9493  | GO:0016310        | phosphorylation         | 0.00    | 136                | 10.5919              | 2504           | 7.2313514        |
| 4897  | GO:0006793        | phosphorus metabol      | 0.00    | 154                | 11.99377             | 2925           | 8.4471655        |
| 4900  | GO:0006796        | phosphate metabolic     | 0.00    | 154                | 11.99377             | 2925           | 8.4471655        |
| 9795  | GO:0016740        | transferase activity    | 0.00    | 189                | 14.719626            | 3764           | 10.870131        |
| 5705  | GO:0008152        | metabolic process       | 0.00    | 721                | 56.15265             | 17432          | 50.34222         |
| 9488  | GO:0016301        | kinase activity         | 0.00    | 99                 | 7.7102804            | 1740           | 5.0249805        |
| 9824  | GO:0016773        | phosphotransferase      | 0.00    | 86                 | 6.697819             | 1493           | 4.311664         |
| 3304  | GO:0004672 GO:005 | protein kinase activit  | 0.00    | 78                 | 6.074766             | 1333           | 3.8495972        |
| 4215  | GO:0005975        | carbohydrate metabo     | 0.00    | 61                 | 4.7507787            | 990            | 2.8590407        |
| 3874  | GO:0005509        | calcium ion binding     | 0.00    | 24                 | 1.8691589            | 279            | 0.8057296        |
| 3306  | GO:0004674 GO:005 | protein serine/threon   | 0.00    | 63                 | 4.906542             | 1062           | 3.0669708        |
| 3490  | GO:0004888 GO:005 | transmembrane rece      | 0.00    | 39                 | 3.037383             | 571            | 1.6490022        |
| 9823  | GO:0016772        | transferase activity, t | 0.00    | 102                | 7.9439254            | 1932           | 5.579461         |
| 24968 | GO:0050662        | coenzyme binding        | 0.00    | 18                 | 1.4018692            | 191            | 0.5515927        |
| 3904  | GO:0005576        | extracellular region    | 0.00    | 17                 | 1.3239875            | 178            | 0.5140497        |
| 3476  | GO:0004872 GO:005 | receptor activity       | 0.00    | 43                 | 3.3489096            | 672            | 1.9406822        |
| 24966 | GO:0050660        | flavin adenine dinucl   | 0.00    | 13                 | 1.0124611            | 118            | 0.34077454       |
| 9845  | GO:0016798        | hydrolase activity, ac  | 0.00    | 29                 | 2.258567             | 401            | 1.1580559        |
| 9486  | GO:0016298        | lipase activity         | 0.00    | 17                 | 1.3239875            | 185            | 0.53426516       |
| 11202 | GO:0019199        | transmembrane rece      | 0.00    | 34                 | 2.647975             | 504            | 1.4555116        |
| 4609  | GO:0006464        | protein modification    | 0.00    | 135                | 10.514019            | 2781           | 8.031305         |
| 9813  | GO:0016759        | cellulose synthase a    | 0.00    | 8                  | 0.62305295           | 57             | 0.16461143       |
| 3167  | GO:0004508        | steroid 17-alpha-mo     | 0.00    | 2                  | 0.15576324           | 2              | 0.00577584       |
| 9847  | GO:0016801        | hydrolase activity, ac  | 0.00    | 4                  | 0.31152648           | 14             | 0.040430877      |
| 25098 | GO:0050794 GO:005 | regulation of cellular  | 0.00    | 182                | 14.174455            | 3987           | 11.514136        |
| 3475  | GO:0004871 GO:005 | signal transducer ac    | 0.00    | 46                 | 3.5825546            | 787            | 2.2727928        |
| 27063 | GO:0060089        | molecular transduce     | 0.00    | 46                 | 3.5825546            | 787            | 2.2727928        |
| 3260  | GO:0004620        | phospholipase activi    | 0.00    | 12                 | 0.93457943           | 123            | 0.35521415       |
| 5981  | GO:0008509        | anion transmembran      | 0.00    | 19                 | 1.4797508            | 245            | 0.70754033       |
| 8980  | GO:0015711        | organic anion transp    | 0.00    | 6                  | 0.46728972           | 37             | 0.10685303       |
| 4917  | GO:0006820 GO:005 | anion transport         | 0.00    | 19                 | 1.4797508            | 247            | 0.7133162        |
| 25094 | GO:0050789 GO:005 | regulation of biologic  | 0.00    | 194                | 15.109035            | 4315           | 12.461374        |
| 8159  | GO:0010951        | negative regulation c   | 0.00    | 10                 | 0.7788162            | 95             | 0.27435237       |
| 3472  | GO:0004866        | endopeptidase inhibi    | 0.00    | 10                 | 0.7788162            | 95             | 0.27435237       |
| 26712 | GO:0052548        | regulation of endope    | 0.00    | 10                 | 0.7788162            | 95             | 0.27435237       |
| 28101 | GO:0061135        | endopeptidase regul     | 0.00    | 10                 | 0.7788162            | 95             | 0.27435237       |
| 9816  | GO:0016762        | xyloglucan:xylogluco    | 0.00    | 5                  | 0.3894081            | 27             | 0.077973835      |
| 3473  | GO:0004867        | serine-type endopep     | 0.00    | 8                  | 0.62305295           | 66             | 0.1906027        |
| 5891  | GO:0008395 GO:005 | steroid hydroxylase a   | 0.00    | 6                  | 0.46728972           | 40             | 0.1155168        |
| 3723  | GO:0005215 GO:005 | transporter activity    | 0.00    | 91                 | 7.0872273            | 1844           | 5.325324         |
| 19684 | GO:0043412        | macromolecule mod       | 0.00    | 135                | 10.514019            | 2900           | 8.374968         |
| 5986  | GO:0008514        | organic anion transm    | 0.00    | 5                  | 0.3894081            | 29             | 0.083749674      |
| 9848  | GO:0016802        | trialkylsulfonium hyd   | 0.00    | 2                  | 0.15576324           | 3              | 0.00866376       |
| 2822  | GO:0004013        | adenosylhomocystei      | 0.00    | 2                  | 0.15576324           | 3              | 0.00866376       |
| 28364 | GO:0065007        | biological regulation   | 0.00    | 194                | 15.109035            | 4376           | 12.637537        |
| 3242  | GO:0004601 GO:005 | peroxidase activity     | 0.00    | 12                 | 0.93457943           | 135            | 0.38986918       |
| 9754  | GO:0016684        | oxidoreductase activ    | 0.00    | 12                 | 0.93457943           | 135            | 0.38986918       |
| 12602 | GO:0023052 GO:005 | signaling               | 0.00    | 52                 | 4.0498443            | 961            | 2.775291         |
| 5195  | GO:0007165 GO:005 | signal transduction     | 0.00    | 52                 | 4.0498443            | 961            | 2.775291         |
| 23116 | GO:0047631        | ADP-ribose diphosph     | 0.01    | 3                  | 0.23364486           | 10             | 0.0288792        |
| 2797  | GO:0003979        | UDP-glucose 6-dehy      | 0.01    | 3                  | 0.23364486           | 10             | 0.0288792        |
| 3307  | GO:0004675        | transmembrane rece      | 0.01    | 24                 | 1.8691589            | 367            | 1.0598665        |
| 23515 | GO:0048037        | cofactor binding        | 0.01    | 22                 | 1.7133956            | 327            | 0.94434977       |
| 26931 | GO:0055085        | transmembrane tran      | 0.01    | 77                 | 5.996885             | 1548           | 4.4705           |
| 21331 | GO:0045735        | nutrient reservoir act  | 0.01    | 9                  | 0.7009346            | 89             | 0.25702485       |
| 3464  | GO:0004857        | enzyme inhibitor acti   | 0.01    | 13                 | 1.0124611            | 157            | 0.4534034        |
| 13082 | GO:0030599        | pectinesterase activi   | 0.01    | 14                 | 1.0903426            | 178            | 0.5140497        |
| 3877  | GO:0005516        | calmodulin binding      | 0.01    | 17                 | 1.3239875            | 236            | 0.6815491        |
| 7690  | GO:0010466        | negative regulation c   | 0.01    | 10                 | 0.7788162            | 110            | 0.31767118       |
| 12946 | GO:0030414        | peptidase inhibitor a   | 0.01    | 10                 | 0.7788162            | 110            | 0.31767118       |
| 25636 | GO:0051346        | negative regulation c   | 0.01    | 10                 | 0.7788162            | 110            | 0.31767118       |
| 6293  | GO:0008898        | homocysteine S-met      | 0.01    | 2                  | 0.15576324           | 4              | 0.011551679      |
| 16227 | GO:0033843        | xyloglucan 6-xylosyl    | 0.01    | 2                  | 0.15576324           | 4              | 0.011551679      |
| 6018  | GO:0008559 GO:005 | xenobiotic-transporti   | 0.01    | 7                  | 0.5451713            | 62             | 0.17905103       |
| 19225 | GO:0042908        | xenobiotic transport    | 0.01    | 7                  | 0.5451713            | 62             | 0.17905103       |
| 19227 | GO:0042910        | xenobiotic transporte   | 0.01    | 7                  | 0.5451713            | 62             | 0.17905103       |
| 12547 | GO:0022857 GO:005 | transmembrane tran      | 0.01    | 73                 | 5.685358             | 1483           | 4.282785         |
| 26711 | GO:0052547        | regulation of peptida   | 0.01    | 10                 | 0.7788162            | 112            | 0.32344702       |
| 28100 | GO:0061134        | peptidase regulator a   | 0.01    | 10                 | 0.7788162            | 112            | 0.32344702       |
| 12806 | GO:0030247        | polysaccharide bindi    | 0.01    | 5                  | 0.3894081            | 35             | 0.10107719       |
| 1169  | GO:0001871        | pattern binding         | 0.01    | 5                  | 0.3894081            | 35             | 0.10107719       |
| 5636  | GO:0008061        | chitin binding          | 0.01    | 4                  | 0.31152648           | 23             | 0.06642216       |
| 26845 | GO:0052689        | carboxylic ester hydr   | 0.01    | 31                 | 2.4143302            | 538            | 1.5537009        |
| 9814  | GO:0016760        | cellulose synthase (l   | 0.01    | 3                  | 0.23364486           | 13             | 0.037542958      |
| 3213  | GO:0004568        | chitinase activity      | 0.01    | 4                  | 0.31152648           | 24             | 0.06931008       |
| 6248  | GO:0008843        | endochitinase activit   | 0.01    | 4                  | 0.31152648           | 24             | 0.06931008       |
| 25578 | GO:0051287 GO:005 | NAD binding             | 0.01    | 4                  | 0.31152648           | 24             | 0.06931008       |
| 3229  | GO:0004586        | ornithine decarboxyl    | 0.01    | 2                  | 0.15576324           | 5              | 0.0144396        |
| 9812  | GO:0016758        | transferase activity, t | 0.01    | 29                 | 2.258567             | 501            | 1.4468478        |
| 2999  | GO:0004312        | fatty acid synthase a   | 0.01    | 7                  | 0.5451713            | 68             | 0.19637854       |
| 11157 | GO:0019144        | ADP-sugar diphosph      | 0.01    | 3                  | 0.23364486           | 14             | 0.040430877      |

|       |                  |                         |      |     |            |       |             |
|-------|------------------|-------------------------|------|-----|------------|-------|-------------|
| 4909  | GO:0006810 GO:00 | transport               | 0.01 | 106 | 8.255452   | 2315  | 6.6855345   |
| 25529 | GO:0051234       | establishment of loca   | 0.01 | 106 | 8.255452   | 2315  | 6.6855345   |
| 4942  | GO:0006855       | drug transmembrane      | 0.01 | 11  | 0.8566978  | 139   | 0.40142086  |
| 8642  | GO:0015238 GO:00 | drug transmembrane      | 0.01 | 11  | 0.8566978  | 139   | 0.40142086  |
| 9154  | GO:0015893       | drug transport          | 0.01 | 11  | 0.8566978  | 139   | 0.40142086  |
| 18832 | GO:0042493 GO:00 | response to drug        | 0.01 | 11  | 0.8566978  | 139   | 0.40142086  |
| 25626 | GO:0051336       | regulation of hydrola   | 0.01 | 14  | 1.0903426  | 196   | 0.5660323   |
| 9811  | GO:0016757 GO:00 | transferase activity, t | 0.01 | 39  | 3.037383   | 729   | 2.1052935   |
| 25476 | GO:0051179       | localization            | 0.02 | 106 | 8.255452   | 2319  | 6.697086    |
| 119   | GO:0000151       | ubiquitin ligase comp   | 0.02 | 8   | 0.62305295 | 88    | 0.25413695  |
| 3209  | GO:0004564       | beta-fructofuranosid    | 0.02 | 3   | 0.23364486 | 15    | 0.043318797 |
| 3305  | GO:0004673 GO:00 | protein histidine kina  | 0.02 | 2   | 0.15576324 | 6     | 0.01732752  |
| 4118  | GO:0005852       | eukaryotic translatio   | 0.02 | 2   | 0.15576324 | 6     | 0.01732752  |
| 11899 | GO:0019992       | diacylglycerol bindin   | 0.02 | 2   | 0.15576324 | 6     | 0.01732752  |
| 18640 | GO:0042285       | xylosyltransferase ac   | 0.02 | 2   | 0.15576324 | 6     | 0.01732752  |
| 3382  | GO:0004768 GO:00 | stearoyl-CoA 9-desa     | 0.02 | 3   | 0.23364486 | 16    | 0.046206716 |
| 9427  | GO:0016215       | CoA desaturase acti     | 0.02 | 3   | 0.23364486 | 16    | 0.046206716 |
| 9422  | GO:0016209       | antioxidant activity    | 0.02 | 12  | 0.93457943 | 165   | 0.47650677  |
| 18738 | GO:0042389       | omega-3 fatty acid d    | 0.02 | 3   | 0.23364486 | 17    | 0.049094636 |
| 19393 | GO:0043086       | negative regulation c   | 0.02 | 13  | 1.0124611  | 188   | 0.54292893  |
| 20342 | GO:0044092       | negative regulation c   | 0.02 | 13  | 1.0124611  | 188   | 0.54292893  |
| 6216  | GO:0008810       | cellulase activity      | 0.02 | 4   | 0.31152648 | 30    | 0.086637594 |
| 3200  | GO:0004553 GO:00 | hydrolase activity, hy  | 0.02 | 19  | 1.4797508  | 312   | 0.90103096  |
| 12805 | GO:0030246       | carbohydrate binding    | 0.03 | 16  | 1.2461059  | 251   | 0.7248679   |
| 6416  | GO:0009044       | xylan 1,4-beta-xylosi   | 0.03 | 3   | 0.23364486 | 18    | 0.051982556 |
| 9871  | GO:0016831       | carboxy-lyase activit   | 0.03 | 9   | 0.7009346  | 115   | 0.3321108   |
| 25998 | GO:0051716       | cellular response to    | 0.03 | 55  | 4.283489   | 1138  | 3.2864528   |
| 6424  | GO:0009055 GO:00 | electron carrier activ  | 0.03 | 11  | 0.8566978  | 154   | 0.44473964  |
| 3265  | GO:0004630       | phospholipase D act     | 0.03 | 4   | 0.31152648 | 32    | 0.09241343  |
| 3785  | GO:0005315 GO:00 | inorganic phosphate     | 0.03 | 4   | 0.31152648 | 32    | 0.09241343  |
| 19758 | GO:0043492       | ATPase activity, cou    | 0.03 | 15  | 1.1682243  | 235   | 0.67866117  |
| 3827  | GO:0005372       | water transmembran      | 0.03 | 7   | 0.5451713  | 81    | 0.23392151  |
| 4927  | GO:0006833       | water transport         | 0.03 | 7   | 0.5451713  | 81    | 0.23392151  |
| 8652  | GO:0015250       | water channel activit   | 0.03 | 7   | 0.5451713  | 81    | 0.23392151  |
| 18429 | GO:0042044       | fluid transport         | 0.03 | 7   | 0.5451713  | 81    | 0.23392151  |
| 9800  | GO:0016746       | transferase activity, t | 0.03 | 27  | 2.1028037  | 498   | 1.438184    |
| 3051  | GO:0004367       | glycerol-3-phosphate    | 0.03 | 2   | 0.15576324 | 8     | 0.023103358 |
| 5698  | GO:0008142       | oxysterol binding       | 0.03 | 2   | 0.15576324 | 8     | 0.023103358 |
| 6684  | GO:0009331       | glycerol-3-phosphate    | 0.03 | 2   | 0.15576324 | 8     | 0.023103358 |
| 15335 | GO:0032934 GO:00 | sterol binding          | 0.03 | 2   | 0.15576324 | 8     | 0.023103358 |
| 18639 | GO:0042284       | sphingolipid delta-4    | 0.03 | 2   | 0.15576324 | 8     | 0.023103358 |
| 4755  | GO:0006629       | lipid metabolic proce   | 0.03 | 31  | 2.4143302  | 590   | 1.7038727   |
| 6750  | GO:0009415       | response to water       | 0.03 | 5   | 0.3894081  | 49    | 0.14150807  |
| 11221 | GO:0019219       | regulation of nucleot   | 0.03 | 117 | 9.112149   | 2675  | 7.7251854   |
| 25468 | GO:0051171       | regulation of nitroge   | 0.03 | 117 | 9.112149   | 2675  | 7.7251854   |
| 12533 | GO:0022838       | substrate-specific ch   | 0.04 | 14  | 1.0903426  | 221   | 0.63823026  |
| 21046 | GO:0045437       | uridine nucleosidase    | 0.04 | 1   | 0.07788162 | 1     | 0.00288792  |
| 24582 | GO:0050263       | ribosylpyrimidine nuc   | 0.04 | 1   | 0.07788162 | 1     | 0.00288792  |
| 31465 | GO:0080090       | regulation of primary   | 0.04 | 118 | 9.190031   | 2710  | 7.826263    |
| 9836  | GO:0016787       | hydrolase activity      | 0.04 | 158 | 12.305296  | 3723  | 10.751725   |
| 23199 | GO:0047714       | galactolipase activity  | 0.04 | 4   | 0.31152648 | 35    | 0.10107719  |
| 7213  | GO:0009966 GO:00 | regulation of signal t  | 0.04 | 5   | 0.3894081  | 51    | 0.14728391  |
| 12601 | GO:0023051       | regulation of signalin  | 0.04 | 5   | 0.3894081  | 51    | 0.14728391  |
| 4530  | GO:0006355 GO:00 | regulation of transcri  | 0.04 | 113 | 8.800623   | 2591  | 7.4826      |
| 25544 | GO:0051252       | regulation of RNA m     | 0.04 | 113 | 8.800623   | 2593  | 7.488376    |
| 23518 | GO:0048040       | UDP-glucuronate de      | 0.04 | 3   | 0.23364486 | 21    | 0.060646318 |
| 13753 | GO:0031323       | regulation of cellular  | 0.04 | 120 | 9.345795   | 2770  | 7.999538    |
| 3734  | GO:0005227       | calcium activated ca    | 0.04 | 2   | 0.15576324 | 9     | 0.025991278 |
| 8661  | GO:0015269       | calcium-activated po    | 0.04 | 2   | 0.15576324 | 9     | 0.025991278 |
| 12534 | GO:0022839       | ion gated channel ac    | 0.04 | 2   | 0.15576324 | 9     | 0.025991278 |
| 19254 | GO:0042937       | tripeptide transporte   | 0.04 | 2   | 0.15576324 | 9     | 0.025991278 |
| 20517 | GO:0044267       | cellular protein meta   | 0.04 | 138 | 10.7476635 | 3225  | 9.313541    |
| 4915  | GO:0006817       | phosphate transport     | 0.04 | 5   | 0.3894081  | 52    | 0.15017183  |
| 8528  | GO:0015114       | phosphate transmen      | 0.04 | 5   | 0.3894081  | 52    | 0.15017183  |
| 17801 | GO:0035435       | phosphate transmen      | 0.04 | 5   | 0.3894081  | 52    | 0.15017183  |
| 8660  | GO:0015267 GO:00 | channel activity        | 0.04 | 14  | 1.0903426  | 226   | 0.6526699   |
| 12515 | GO:0022803       | passive transmembr      | 0.04 | 14  | 1.0903426  | 226   | 0.6526699   |
| 23522 | GO:0048046       | apoplast                | 0.05 | 6   | 0.46728972 | 70    | 0.20215438  |
| 7141  | GO:0009889       | regulation of biosynt   | 0.05 | 113 | 8.800623   | 2605  | 7.523031    |
| 7772  | GO:0010556       | regulation of macrom    | 0.05 | 113 | 8.800623   | 2605  | 7.523031    |
| 13756 | GO:0031326       | regulation of cellular  | 0.05 | 113 | 8.800623   | 2605  | 7.523031    |
| 32213 | GO:2000112       | regulation of cellular  | 0.05 | 113 | 8.800623   | 2605  | 7.523031    |
| 2626  | GO:0003674 GO:00 | molecular_function      | 0.05 | 932 | 72.58567   | 24394 | 70.447914   |
| 8489  | GO:0015066       | alpha-amylase inhibi    | 0.05 | 3   | 0.23364486 | 22    | 0.06353424  |
| 11224 | GO:0019222       | regulation of metabo    | 0.05 | 133 | 10.358255  | 3115  | 8.995871    |
| 5716  | GO:0008172       | S-methyltransferase     | 0.05 | 2   | 0.15576324 | 10    | 0.0288792   |
| 6632  | GO:0009269       | response to desiccac    | 0.05 | 2   | 0.15576324 | 10    | 0.0288792   |
| 9826  | GO:0016775       | phosphotransferase      | 0.05 | 2   | 0.15576324 | 10    | 0.0288792   |
| 18956 | GO:0042626       | ATPase activity, cou    | 0.05 | 13  | 1.0124611  | 211   | 0.6093511   |
| 12644 | GO:0030054       | cell junction           | 0.05 | 3   | 0.23364486 | 23    | 0.06642216  |
| 22414 | GO:0046912       | transferase activity, t | 0.05 | 3   | 0.23364486 | 23    | 0.06642216  |
| 9861  | GO:0016820       | hydrolase activity, ac  | 0.05 | 13  | 1.0124611  | 212   | 0.612239    |
| 8494  | GO:0015075       | ion transmembrane t     | 0.05 | 40  | 3.115265   | 827   | 2.3883097   |
| 9801  | GO:0016747       | transferase activity, t | 0.06 | 24  | 1.8691589  | 456   | 1.3168914   |
| 9779  | GO:0016717       | oxidoreductase activ    | 0.06 | 3   | 0.23364486 | 24    | 0.06931008  |
| 27228 | GO:0060255       | regulation of macrom    | 0.06 | 114 | 8.878505   | 2660  | 7.6818666   |



|       |                  |                         |      |     |            |      |             |
|-------|------------------|-------------------------|------|-----|------------|------|-------------|
| 2897  | GO:0004091 GO:00 | carboxylesterase act    | 0.06 | 12  | 0.93457943 | 194  | 0.5602564   |
| 7692  | GO:0010468       | regulation of gene ex   | 0.06 | 113 | 8.800623   | 2635 | 7.6096687   |
| 12574 | GO:0022892       | substrate-specific tra  | 0.06 | 66  | 5.140187   | 1463 | 4.2250266   |
| 16603 | GO:0034220       | ion transmembrane t     | 0.06 | 40  | 3.115265   | 833  | 2.4056373   |
| 23973 | GO:0048583       | regulation of respons   | 0.06 | 5   | 0.3894081  | 57   | 0.16461143  |
| 2989  | GO:0004301       | epoxide hydrolase a     | 0.06 | 2   | 0.15576324 | 11   | 0.03176712  |
| 4250  | GO:0006012       | galactose metabolic     | 0.06 | 2   | 0.15576324 | 11   | 0.03176712  |
| 9849  | GO:0016803       | ether hydrolase activ   | 0.06 | 2   | 0.15576324 | 11   | 0.03176712  |
| 19256 | GO:0042939       | tripeptide transport    | 0.06 | 2   | 0.15576324 | 11   | 0.03176712  |
| 8517  | GO:0015103       | inorganic anion trans   | 0.06 | 10  | 0.7788162  | 154  | 0.44473964  |
| 8749  | GO:0015399       | primary active transp   | 0.06 | 15  | 1.1682243  | 260  | 0.75085914  |
| 8753  | GO:0015405       | P-P-bond-hydrolysis     | 0.06 | 15  | 1.1682243  | 260  | 0.75085914  |
| 22478 | GO:0046982       | protein heterodimeriz   | 0.06 | 8   | 0.62305295 | 114  | 0.3292286   |
| 8558  | GO:0015145       | monosaccharide tran     | 0.06 | 5   | 0.3894081  | 58   | 0.16749935  |
| 9018  | GO:0015749       | monosaccharide tran     | 0.06 | 5   | 0.3894081  | 58   | 0.16749935  |
| 8967  | GO:0015698       | inorganic anion trans   | 0.06 | 11  | 0.8566978  | 176  | 0.5082739   |
| 2831  | GO:0004022       | alcohol dehydrogen      | 0.07 | 5   | 0.3894081  | 59   | 0.17038727  |
| 9909  | GO:0016877       | ligase activity, formir | 0.07 | 6   | 0.46728972 | 78   | 0.22525774  |
| 7000  | GO:0009734       | auxin mediated signa    | 0.07 | 3   | 0.23364486 | 26   | 0.075085916 |
| 7540  | GO:0010315       | auxin efflux            | 0.07 | 3   | 0.23364486 | 26   | 0.075085916 |
| 7553  | GO:0010329       | auxin efflux transmem   | 0.07 | 3   | 0.23364486 | 26   | 0.075085916 |
| 29729 | GO:0071365       | cellular response to    | 0.07 | 3   | 0.23364486 | 26   | 0.075085916 |
| 3864  | GO:0005496       | steroid binding         | 0.07 | 2   | 0.15576324 | 12   | 0.03465504  |
| 6946  | GO:0009678       | hydrogen-translocati    | 0.07 | 2   | 0.15576324 | 12   | 0.03465504  |
| 7526  | GO:0010301 GO:00 | xanthoxin dehydroge     | 0.07 | 2   | 0.15576324 | 12   | 0.03465504  |
| 9699  | GO:0016616       | oxidoreductase activ    | 0.07 | 15  | 1.1682243  | 266  | 0.7681867   |
| 2804  | GO:0003988       | acetyl-CoA C-acyltra    | 0.07 | 1   | 0.07788162 | 2    | 0.00577584  |
| 2951  | GO:0004149       | dihydrolypoyllysine-re  | 0.07 | 1   | 0.07788162 | 2    | 0.00577584  |
| 2990  | GO:0004303       | estradiol 17-beta-de    | 0.07 | 1   | 0.07788162 | 2    | 0.00577584  |
| 3148  | GO:0004489 GO:00 | methylenetetrahydro     | 0.07 | 1   | 0.07788162 | 2    | 0.00577584  |
| 4699  | GO:0006570       | tyrosine metabolic pr   | 0.07 | 1   | 0.07788162 | 2    | 0.00577584  |
| 4700  | GO:0006571       | tyrosine biosynthetic   | 0.07 | 1   | 0.07788162 | 2    | 0.00577584  |
| 5941  | GO:0008455       | alpha-1,6-mannosyl      | 0.07 | 1   | 0.07788162 | 2    | 0.00577584  |
| 6593  | GO:0009229       | thiamine diphosphat     | 0.07 | 1   | 0.07788162 | 2    | 0.00577584  |
| 9190  | GO:0015930       | glutamate synthase      | 0.07 | 1   | 0.07788162 | 2    | 0.00577584  |
| 9282  | GO:0016040       | glutamate synthase      | 0.07 | 1   | 0.07788162 | 2    | 0.00577584  |
| 9419  | GO:0016206       | catechol O-methyltra    | 0.07 | 1   | 0.07788162 | 2    | 0.00577584  |
| 9686  | GO:0016602       | CCAAT-binding facto     | 0.07 | 1   | 0.07788162 | 2    | 0.00577584  |
| 9802  | GO:0016748       | succinyltransferase     | 0.07 | 1   | 0.07788162 | 2    | 0.00577584  |
| 9805  | GO:0016751       | S-succinyltransferas    | 0.07 | 1   | 0.07788162 | 2    | 0.00577584  |
| 15586 | GO:0033187       | inositol hexakisphos    | 0.07 | 1   | 0.07788162 | 2    | 0.00577584  |
| 18706 | GO:0042357       | thiamine diphosphat     | 0.07 | 1   | 0.07788162 | 2    | 0.00577584  |
| 20817 | GO:0045181       | glutamate synthase      | 0.07 | 1   | 0.07788162 | 2    | 0.00577584  |
| 22759 | GO:0047268       | galactinol-raffinose c  | 0.07 | 1   | 0.07788162 | 2    | 0.00577584  |
| 168   | GO:0000221       | vacuolar proton-trans   | 0.07 | 1   | 0.07788162 | 2    | 0.00577584  |
| 535   | GO:0000826       | inositol pyrophospha    | 0.07 | 1   | 0.07788162 | 2    | 0.00577584  |
| 537   | GO:0000828       | inositol hexakisphos    | 0.07 | 1   | 0.07788162 | 2    | 0.00577584  |
| 2699  | GO:0003849       | 3-deoxy-7-phosphoh      | 0.07 | 1   | 0.07788162 | 2    | 0.00577584  |
| 9837  | GO:0016788       | hydrolase activity, ac  | 0.07 | 68  | 5.29595    | 1534 | 4.430069    |
| 8526  | GO:0015112       | nitrate transmembran    | 0.08 | 5   | 0.3894081  | 61   | 0.1761631   |
| 8975  | GO:0015706 GO:00 | nitrate transport       | 0.08 | 5   | 0.3894081  | 61   | 0.1761631   |
| 12573 | GO:0022891       | substrate-specific tra  | 0.08 | 56  | 4.3613706  | 1241 | 3.5839086   |
| 8919  | GO:0015645       | fatty acid ligase activ | 0.08 | 3   | 0.23364486 | 27   | 0.077973835 |
| 9541  | GO:0016413       | O-acetyltransferase     | 0.08 | 3   | 0.23364486 | 27   | 0.077973835 |
| 22049 | GO:0046527       | glucosyltransferase     | 0.08 | 15  | 1.1682243  | 270  | 0.77973837  |
| 3002  | GO:0004315       | 3-oxoacyl-[acyl-carri   | 0.08 | 2   | 0.15576324 | 13   | 0.037542958 |
| 7551  | GO:0010327       | acetyl CoA:(Z)-3-hex    | 0.08 | 2   | 0.15576324 | 13   | 0.037542958 |
| 8863  | GO:0015562       | efflux transmembran     | 0.08 | 3   | 0.23364486 | 28   | 0.080861755 |
| 14726 | GO:0032318       | regulation of Ras G1    | 0.08 | 4   | 0.31152648 | 45   | 0.1299564   |
| 22096 | GO:0046578       | regulation of Ras pro   | 0.08 | 4   | 0.31152648 | 45   | 0.1299564   |
| 25355 | GO:0051056       | regulation of small G   | 0.08 | 4   | 0.31152648 | 45   | 0.1299564   |
| 11931 | GO:0020037       | heme binding            | 0.09 | 27  | 2.1028037  | 550  | 1.5883559   |
| 12692 | GO:0030117       | membrane coat           | 0.09 | 6   | 0.46728972 | 84   | 0.24258527  |
| 23870 | GO:0048475       | coated membrane         | 0.09 | 6   | 0.46728972 | 84   | 0.24258527  |
| 3641  | GO:0005099       | Ras GTPase activat      | 0.09 | 2   | 0.15576324 | 14   | 0.040430877 |
| 9720  | GO:0016639       | oxidoreductase activ    | 0.09 | 2   | 0.15576324 | 14   | 0.040430877 |
| 14728 | GO:0032320       | positive regulation of  | 0.09 | 2   | 0.15576324 | 14   | 0.040430877 |
| 19253 | GO:0042936       | dipeptide transporter   | 0.10 | 7   | 0.5451713  | 105  | 0.3032316   |
| 19255 | GO:0042938       | dipeptide transport     | 0.10 | 7   | 0.5451713  | 105  | 0.3032316   |
| 3009  | GO:0004322       | ferroxidase activity    | 0.10 | 3   | 0.23364486 | 30   | 0.086637594 |
| 8683  | GO:0015301 GO:00 | anion:anion antiporte   | 0.10 | 3   | 0.23364486 | 30   | 0.086637594 |
| 9785  | GO:0016724       | oxidoreductase activ    | 0.10 | 3   | 0.23364486 | 30   | 0.086637594 |
| 5809  | GO:0008289       | lipid binding           | 0.10 | 14  | 1.0903426  | 258  | 0.74508333  |
| 3341  | GO:0004722 GO:00 | protein serine/threon   | 0.10 | 10  | 0.7788162  | 171  | 0.4938343   |
| 18912 | GO:0042578       | phosphoric ester hyc    | 0.10 | 22  | 1.7133956  | 444  | 1.2822365   |
| 25516 | GO:0051219       | phosphoprotein bind     | 0.10 | 2   | 0.15576324 | 15   | 0.043318797 |
| 18582 | GO:0042221       | response to chemica     | 0.11 | 17  | 1.3239875  | 328  | 0.94723773  |
| 3872  | GO:0005506       | iron ion binding        | 0.11 | 27  | 2.1028037  | 563  | 1.6258988   |
| 19590 | GO:0043295       | glutathione binding     | 0.11 | 3   | 0.23364486 | 31   | 0.08952551  |
| 9600  | GO:0016491       | oxidoreductase activ    | 0.11 | 74  | 5.76324    | 1724 | 4.9787736   |
| 3134  | GO:0004474       | malate synthase acti    | 0.11 | 1   | 0.07788162 | 3    | 0.00866376  |
| 3252  | GO:0004612       | phosphoenolpyruvat      | 0.11 | 1   | 0.07788162 | 3    | 0.00866376  |
| 4319  | GO:0006081       | cellular aldehyde me    | 0.11 | 1   | 0.07788162 | 3    | 0.00866376  |
| 4330  | GO:0006097       | glyoxylate cycle        | 0.11 | 1   | 0.07788162 | 3    | 0.00866376  |
| 4376  | GO:0006166       | purine ribonucleosid    | 0.11 | 1   | 0.07788162 | 3    | 0.00866376  |
| 9478  | GO:0016286       | small conductance c     | 0.11 | 1   | 0.07788162 | 3    | 0.00866376  |
| 13651 | GO:0031219       | levanase activity       | 0.11 | 1   | 0.07788162 | 3    | 0.00866376  |
| 19408 | GO:0043101       | purine-containing co    | 0.11 | 1   | 0.07788162 | 3    | 0.00866376  |
| 19477 | GO:0043174       | nucleoside salvage      | 0.11 | 1   | 0.07788162 | 3    | 0.00866376  |
| 21936 | GO:0046409       | p-coumarate 3-hydr      | 0.11 | 1   | 0.07788162 | 3    | 0.00866376  |
| 22011 | GO:0046487       | glyoxylate metabolic    | 0.11 | 1   | 0.07788162 | 3    | 0.00866376  |

|       |                  |                         |      |     |            |      |             |
|-------|------------------|-------------------------|------|-----|------------|------|-------------|
| 11522 | GO:0019538 GO:00 | protein metabolic pro   | 0.11 | 168 | 13.084112  | 4134 | 11.938661   |
| 9267  | GO:0016021       | integral to membrane    | 0.11 | 49  | 3.8161993  | 1103 | 3.1853757   |
| 5096  | GO:0007047       | cellular cell wall orga | 0.11 | 4   | 0.31152648 | 50   | 0.14439599  |
| 6932  | GO:0009664       | plant-type cell wall o  | 0.11 | 4   | 0.31152648 | 50   | 0.14439599  |
| 20857 | GO:0045229       | external encapsulati    | 0.11 | 4   | 0.31152648 | 50   | 0.14439599  |
| 30033 | GO:0071669       | plant-type cell wall o  | 0.11 | 4   | 0.31152648 | 50   | 0.14439599  |
| 20488 | GO:0044238       | primary metabolic pr    | 0.12 | 359 | 27.959501  | 9167 | 26.47356    |
| 12516 | GO:0022804       | active transmembran     | 0.12 | 36  | 2.8037384  | 787  | 2.2727928   |
| 4910  | GO:0006811       | ion transport           | 0.12 | 43  | 3.3489096  | 959  | 2.769515    |
| 3072  | GO:0004396       | hexokinase activity     | 0.12 | 2   | 0.15576324 | 16   | 0.046206716 |
| 3334  | GO:0004713 GO:00 | protein tyrosine kina   | 0.12 | 2   | 0.15576324 | 16   | 0.046206716 |
| 15688 | GO:0033293       | monocarboxylic acid     | 0.12 | 2   | 0.15576324 | 16   | 0.046206716 |
| 22412 | GO:0046910       | pectinesterase inhibi   | 0.12 | 2   | 0.15576324 | 16   | 0.046206716 |
| 2982  | GO:0004197       | cysteine-type endop     | 0.12 | 6   | 0.46728972 | 90   | 0.2599128   |
| 7173  | GO:0009922       | fatty acid elongase a   | 0.12 | 4   | 0.31152648 | 51   | 0.14728391  |
| 3340  | GO:0004721       | phosphoprotein phos     | 0.12 | 11  | 0.8566978  | 199  | 0.57469606  |
| 2809  | GO:0003993       | acid phosphatase ac     | 0.13 | 4   | 0.31152648 | 52   | 0.15017183  |
| 9923  | GO:0016892       | endoribonuclease ac     | 0.13 | 2   | 0.15576324 | 17   | 0.049094636 |
| 9925  | GO:0016894       | endonuclease activit    | 0.13 | 2   | 0.15576324 | 17   | 0.049094636 |
| 16281 | GO:0033897       | ribonuclease T2 acti    | 0.13 | 2   | 0.15576324 | 17   | 0.049094636 |
| 6072  | GO:0008645       | hexose transport        | 0.13 | 3   | 0.23364486 | 34   | 0.09818927  |
| 8562  | GO:0015149       | hexose transmembra      | 0.13 | 3   | 0.23364486 | 34   | 0.09818927  |
| 17794 | GO:0035428       | hexose transmembra      | 0.13 | 3   | 0.23364486 | 34   | 0.09818927  |
| 9697  | GO:0016614       | oxidoreductase activ    | 0.13 | 15  | 1.1682243  | 293  | 0.84616053  |
| 29246 | GO:0070882       | cellular cell wall orga | 0.13 | 4   | 0.31152648 | 53   | 0.15305975  |
| 6355  | GO:0008970       | phospholipase A1 ac     | 0.14 | 3   | 0.23364486 | 35   | 0.10107719  |
| 5702  | GO:0008146       | sulfotransferase acti   | 0.14 | 4   | 0.31152648 | 54   | 0.15594767  |
| 2872  | GO:0004066       | asparagine synthase     | 0.14 | 1   | 0.07788162 | 4    | 0.011551679 |
| 2900  | GO:0004096 GO:00 | catalase activity       | 0.14 | 1   | 0.07788162 | 4    | 0.011551679 |
| 2967  | GO:0004165 GO:00 | dodecenoyl-CoA del      | 0.14 | 1   | 0.07788162 | 4    | 0.011551679 |
| 3093  | GO:0004421       | hydroxymethylglutan     | 0.14 | 1   | 0.07788162 | 4    | 0.011551679 |
| 3119  | GO:0004457       | lactate dehydrogena     | 0.14 | 1   | 0.07788162 | 4    | 0.011551679 |
| 3121  | GO:0004459       | L-lactate dehydrogen    | 0.14 | 1   | 0.07788162 | 4    | 0.011551679 |
| 3291  | GO:0004657       | proline dehydrogena     | 0.14 | 1   | 0.07788162 | 4    | 0.011551679 |
| 3399  | GO:0004788       | thiamine diphosphok     | 0.14 | 1   | 0.07788162 | 4    | 0.011551679 |
| 3406  | GO:0004795       | threonine synthase a    | 0.14 | 1   | 0.07788162 | 4    | 0.011551679 |
| 3456  | GO:0004849       | uridine kinase activit  | 0.14 | 1   | 0.07788162 | 4    | 0.011551679 |
| 3639  | GO:0005097       | Rab GTPase activat      | 0.14 | 1   | 0.07788162 | 4    | 0.011551679 |
| 3661  | GO:0005125       | cytokine activity       | 0.14 | 1   | 0.07788162 | 4    | 0.011551679 |
| 3674  | GO:0005138       | interleukin-6 recepto   | 0.14 | 1   | 0.07788162 | 4    | 0.011551679 |
| 4328  | GO:0006094       | gluconeogenesis         | 0.14 | 1   | 0.07788162 | 4    | 0.011551679 |
| 4428  | GO:0006222       | UMP biosynthetic pr     | 0.14 | 1   | 0.07788162 | 4    | 0.011551679 |
| 5934  | GO:0008446       | GDP-mannose 4,6-d       | 0.14 | 1   | 0.07788162 | 4    | 0.011551679 |
| 6199  | GO:0008792       | arginine decarboxyla    | 0.14 | 1   | 0.07788162 | 4    | 0.011551679 |
| 6494  | GO:0009129       | pyrimidine nucleosid    | 0.14 | 1   | 0.07788162 | 4    | 0.011551679 |
| 6495  | GO:0009130       | pyrimidine nucleosid    | 0.14 | 1   | 0.07788162 | 4    | 0.011551679 |
| 6537  | GO:0009173       | pyrimidine ribonucle    | 0.14 | 1   | 0.07788162 | 4    | 0.011551679 |
| 6538  | GO:0009174       | pyrimidine ribonucle    | 0.14 | 1   | 0.07788162 | 4    | 0.011551679 |
| 7083  | GO:0009824       | AMP dimethylallyltra    | 0.14 | 1   | 0.07788162 | 4    | 0.011551679 |
| 7511  | GO:0010285 GO:00 | L,L-diaminopimelate     | 0.14 | 1   | 0.07788162 | 4    | 0.011551679 |
| 8637  | GO:0015231       | 5-formyltetrahydrofo    | 0.14 | 1   | 0.07788162 | 4    | 0.011551679 |
| 8877  | GO:0015578 GO:00 | mannose transmembr      | 0.14 | 1   | 0.07788162 | 4    | 0.011551679 |
| 9030  | GO:0015761       | mannose transport       | 0.14 | 1   | 0.07788162 | 4    | 0.011551679 |
| 9147  | GO:0015885       | 5-formyltetrahydrofo    | 0.14 | 1   | 0.07788162 | 4    | 0.011551679 |
| 9485  | GO:0016297 GO:00 | acyl-acyl-carrier-pro   | 0.14 | 1   | 0.07788162 | 4    | 0.011551679 |
| 11312 | GO:0019319       | hexose biosynthetic     | 0.14 | 1   | 0.07788162 | 4    | 0.011551679 |
| 14721 | GO:0032313       | regulation of Rab GT    | 0.14 | 1   | 0.07788162 | 4    | 0.011551679 |
| 14891 | GO:0032483       | regulation of Rab pr    | 0.14 | 1   | 0.07788162 | 4    | 0.011551679 |
| 15252 | GO:0032851       | positive regulation of  | 0.14 | 1   | 0.07788162 | 4    | 0.011551679 |
| 21615 | GO:0046049       | UMP metabolic proc      | 0.14 | 1   | 0.07788162 | 4    | 0.011551679 |
| 22893 | GO:0047405       | pyrimidine-5'-nucleo    | 0.14 | 1   | 0.07788162 | 4    | 0.011551679 |
| 24433 | GO:0050113       | inositol oxygenase a    | 0.14 | 1   | 0.07788162 | 4    | 0.011551679 |
| 24692 | GO:0050373       | UDP-arabinose 4-ep      | 0.14 | 1   | 0.07788162 | 4    | 0.011551679 |
| 2753  | GO:0003919       | FMN adenylyltransfe     | 0.14 | 1   | 0.07788162 | 4    | 0.011551679 |
| 2799  | GO:0003983       | UTP:glucose-1-phos      | 0.14 | 1   | 0.07788162 | 4    | 0.011551679 |
| 5776  | GO:0008252       | nucleotidase activity   | 0.14 | 2   | 0.15576324 | 18   | 0.051982556 |
| 8213  | GO:0012507 GO:00 | ER to Golgi transpor    | 0.14 | 2   | 0.15576324 | 18   | 0.051982556 |
| 10899 | GO:0018858       | benzoate-CoA ligase     | 0.14 | 2   | 0.15576324 | 18   | 0.051982556 |
| 12702 | GO:0030127       | COPII vesicle coat      | 0.14 | 2   | 0.15576324 | 18   | 0.051982556 |
| 12708 | GO:0030133       | transport vesicle       | 0.14 | 2   | 0.15576324 | 18   | 0.051982556 |
| 12709 | GO:0030134 GO:00 | ER to Golgi transpor    | 0.14 | 2   | 0.15576324 | 18   | 0.051982556 |
| 13129 | GO:0030658       | transport vesicle me    | 0.14 | 2   | 0.15576324 | 18   | 0.051982556 |
| 9869  | GO:0016829       | lyase activity          | 0.14 | 23  | 1.7912773  | 488  | 1.4093049   |
| 9870  | GO:0016830       | carbon-carbon lyase     | 0.15 | 9   | 0.7009346  | 161  | 0.4649551   |
| 8607  | GO:0015197 GO:00 | peptide transporter a   | 0.15 | 8   | 0.62305295 | 139  | 0.40142086  |
| 8608  | GO:0015198       | oligopeptide transpo    | 0.15 | 8   | 0.62305295 | 139  | 0.40142086  |
| 4232  | GO:0005992       | trehalose biosynthet    | 0.15 | 3   | 0.23364486 | 36   | 0.10396511  |
| 25416 | GO:0051119       | sugar transmembran      | 0.15 | 7   | 0.5451713  | 118  | 0.34077454  |
| 4944  | GO:0006857       | oligopeptide transpo    | 0.15 | 8   | 0.62305295 | 141  | 0.4071967   |
| 9099  | GO:0015833       | peptide transport       | 0.15 | 8   | 0.62305295 | 141  | 0.4071967   |
| 3290  | GO:0004656       | procollagen-proline 4   | 0.16 | 2   | 0.15576324 | 19   | 0.054870475 |
| 8212  | GO:0012506       | vesicle membrane        | 0.16 | 2   | 0.15576324 | 19   | 0.054870475 |
| 11752 | GO:0019798       | procollagen-proline c   | 0.16 | 2   | 0.15576324 | 19   | 0.054870475 |
| 12695 | GO:0030120       | vesicle coat            | 0.16 | 2   | 0.15576324 | 19   | 0.054870475 |
| 12710 | GO:0030135 GO:00 | coated vesicle          | 0.16 | 2   | 0.15576324 | 19   | 0.054870475 |
| 13130 | GO:0030659       | cytoplasmic vesicle     | 0.16 | 2   | 0.15576324 | 19   | 0.054870475 |
| 13133 | GO:0030662       | coated vesicle mem      | 0.16 | 2   | 0.15576324 | 19   | 0.054870475 |
| 13966 | GO:0031543       | peptidyl-proline diox   | 0.16 | 2   | 0.15576324 | 19   | 0.054870475 |
| 13968 | GO:0031545       | peptidyl-proline 4-dic  | 0.16 | 2   | 0.15576324 | 19   | 0.054870475 |
| 13829 | GO:0031406       | carboxylic acid bindi   | 0.16 | 6   | 0.46728972 | 98   | 0.28301615  |
| 3758  | GO:0005267       | potassium channel a     | 0.16 | 3   | 0.23364486 | 37   | 0.10685303  |



|       |                  |                         |      |    |            |      |             |
|-------|------------------|-------------------------|------|----|------------|------|-------------|
| 8557  | GO:0015144       | carbohydrate transp     | 0.16 | 8  | 0.62305295 | 143  | 0.41297254  |
| 16602 | GO:0034219       | carbohydrate transp     | 0.16 | 8  | 0.62305295 | 143  | 0.41297254  |
| 9767  | GO:0016705       | oxidoreductase activ    | 0.17 | 16 | 1.2461059  | 329  | 0.95012563  |
| 4231  | GO:0005991       | trehalose metabolic     | 0.17 | 3  | 0.23364486 | 38   | 0.10974095  |
| 8501  | GO:0015085       | calcium ion transme     | 0.17 | 3  | 0.23364486 | 38   | 0.10974095  |
| 22409 | GO:0046906       | tetrapyrrole binding    | 0.17 | 27 | 2.1028037  | 596  | 1.7212002   |
| 29919 | GO:0071555       | cell wall organizator   | 0.17 | 4  | 0.31152648 | 58   | 0.16749935  |
| 12532 | GO:0022836       | gated channel activit   | 0.17 | 7  | 0.5451713  | 122  | 0.3523262   |
| 3328  | GO:0004707 GO:00 | MAP kinase activity     | 0.17 | 2  | 0.15576324 | 20   | 0.0577584   |
| 3798  | GO:0005337       | nucleoside transmen     | 0.17 | 2  | 0.15576324 | 20   | 0.0577584   |
| 8726  | GO:0015368       | calcium:cation antip    | 0.17 | 2  | 0.15576324 | 20   | 0.0577584   |
| 9122  | GO:0015858       | nucleoside transport    | 0.17 | 2  | 0.15576324 | 20   | 0.0577584   |
| 25477 | GO:0051180       | vitamin transport       | 0.17 | 2  | 0.15576324 | 20   | 0.0577584   |
| 25480 | GO:0051183       | vitamin transporter a   | 0.17 | 2  | 0.15576324 | 20   | 0.0577584   |
| 3035  | GO:0004351       | glutamate decarboxy     | 0.17 | 1  | 0.07788162 | 5    | 0.0144396   |
| 3314  | GO:0004689 GO:00 | phosphorylase kinas     | 0.17 | 1  | 0.07788162 | 5    | 0.0144396   |
| 5989  | GO:0008517       | folic acid transporter  | 0.17 | 1  | 0.07788162 | 5    | 0.0144396   |
| 9146  | GO:0015884       | folic acid transport    | 0.17 | 1  | 0.07788162 | 5    | 0.0144396   |
| 22765 | GO:0047274       | galactinol-sucrose g    | 0.17 | 1  | 0.07788162 | 5    | 0.0144396   |
| 31506 | GO:0080131       | hydroxyjasmonate su     | 0.17 | 1  | 0.07788162 | 5    | 0.0144396   |
| 6071  | GO:0008643 GO:00 | carbohydrate transp     | 0.18 | 8  | 0.62305295 | 147  | 0.42452422  |
| 8673  | GO:0015291 GO:00 | secondary active tra    | 0.18 | 19 | 1.4797508  | 407  | 1.1753833   |
| 3129  | GO:0004467       | long-chain fatty acid   | 0.18 | 2  | 0.15576324 | 21   | 0.060646318 |
| 9268  | GO:0016023       | cytoplasmic membra      | 0.18 | 2  | 0.15576324 | 21   | 0.060646318 |
| 14399 | GO:0031988       | membrane-bounded        | 0.18 | 2  | 0.15576324 | 21   | 0.060646318 |
| 9839  | GO:0016791 GO:00 | phosphatase activity    | 0.18 | 18 | 1.4018692  | 383  | 1.1060733   |
| 5652  | GO:0008081 GO:00 | phosphoric diester h    | 0.18 | 4  | 0.31152648 | 60   | 0.17327519  |
| 7021  | GO:0009755       | hormone-mediated s      | 0.18 | 3  | 0.23364486 | 40   | 0.1155168   |
| 15271 | GO:0032870       | cellular response to    | 0.18 | 3  | 0.23364486 | 40   | 0.1155168   |
| 3156  | GO:0004497       | monooxygenase acti      | 0.19 | 9  | 0.7009346  | 172  | 0.49672222  |
| 24858 | GO:0050551       | myrcene synthase ac     | 0.20 | 2  | 0.15576324 | 22   | 0.06353424  |
| 25195 | GO:0050896 GO:00 | response to stimulus    | 0.20 | 77 | 5.996885   | 1881 | 5.432177    |
| 17457 | GO:0035091       | phosphatidylinositol    | 0.20 | 4  | 0.31152648 | 62   | 0.17905103  |
| 20619 | GO:0044425       | membrane part           | 0.20 | 63 | 4.906542   | 1523 | 4.398302    |
| 4912  | GO:0006813 GO:00 | potassium ion transp    | 0.20 | 5  | 0.3894081  | 84   | 0.24258527  |
| 30168 | GO:0071804       | cellular potassium io   | 0.20 | 5  | 0.3894081  | 84   | 0.24258527  |
| 30169 | GO:0071805       | potassium ion transp    | 0.20 | 5  | 0.3894081  | 84   | 0.24258527  |
| 2906  | GO:0004103       | choline kinase activi   | 0.20 | 1  | 0.07788162 | 6    | 0.01732752  |
| 3131  | GO:0004470       | malic enzyme activit    | 0.20 | 1  | 0.07788162 | 6    | 0.01732752  |
| 3133  | GO:0004473       | malate dehydrogena      | 0.20 | 1  | 0.07788162 | 6    | 0.01732752  |
| 3208  | GO:0004563       | beta-N-acetylhexosa     | 0.20 | 1  | 0.07788162 | 6    | 0.01732752  |
| 3269  | GO:0004634       | phosphopyruvate hy      | 0.20 | 1  | 0.07788162 | 6    | 0.01732752  |
| 3342  | GO:0004723 GO:00 | calcium-dependent p     | 0.20 | 1  | 0.07788162 | 6    | 0.01732752  |
| 3413  | GO:0004802       | transketolase activi    | 0.20 | 1  | 0.07788162 | 6    | 0.01732752  |
| 3467  | GO:0004860       | protein kinase inhibit  | 0.20 | 1  | 0.07788162 | 6    | 0.01732752  |
| 3642  | GO:0005100       | Rho GTPase activat      | 0.20 | 1  | 0.07788162 | 6    | 0.01732752  |
| 3845  | GO:0005452       | inorganic anion exch    | 0.20 | 1  | 0.07788162 | 6    | 0.01732752  |
| 4059  | GO:0005774       | vacuolar membrane       | 0.20 | 1  | 0.07788162 | 6    | 0.01732752  |
| 4264  | GO:0006026       | aminoglycan catabol     | 0.20 | 1  | 0.07788162 | 6    | 0.01732752  |
| 4268  | GO:0006030       | chitin metabolic proc   | 0.20 | 1  | 0.07788162 | 6    | 0.01732752  |
| 4270  | GO:0006032       | chitin catabolic proc   | 0.20 | 1  | 0.07788162 | 6    | 0.01732752  |
| 4657  | GO:0006528       | asparagine metaboli     | 0.20 | 1  | 0.07788162 | 6    | 0.01732752  |
| 4658  | GO:0006529       | asparagine biosynth     | 0.20 | 1  | 0.07788162 | 6    | 0.01732752  |
| 4953  | GO:0006868 GO:00 | glutamine transport     | 0.20 | 1  | 0.07788162 | 6    | 0.01732752  |
| 5713  | GO:0008169       | C-methyltransferase     | 0.20 | 1  | 0.07788162 | 6    | 0.01732752  |
| 6000  | GO:0008531       | riboflavin kinase acti  | 0.20 | 1  | 0.07788162 | 6    | 0.01732752  |
| 6344  | GO:0008959       | phosphate acetyltran    | 0.20 | 1  | 0.07788162 | 6    | 0.01732752  |
| 7651  | GO:0010427       | abscisic acid binding   | 0.20 | 1  | 0.07788162 | 6    | 0.01732752  |
| 8505  | GO:0015089       | high affinity copper i  | 0.20 | 1  | 0.07788162 | 6    | 0.01732752  |
| 8596  | GO:0015186       | L-glutamine transme     | 0.20 | 1  | 0.07788162 | 6    | 0.01732752  |
| 9435  | GO:0016231       | beta-N-acetylglucosa    | 0.20 | 1  | 0.07788162 | 6    | 0.01732752  |
| 9584  | GO:0016471       | vacuolar proton-trans   | 0.20 | 1  | 0.07788162 | 6    | 0.01732752  |
| 14727 | GO:0032319       | regulation of Rho GTP   | 0.20 | 1  | 0.07788162 | 6    | 0.01732752  |
| 14729 | GO:0032321       | positive regulation of  | 0.20 | 1  | 0.07788162 | 6    | 0.01732752  |
| 17394 | GO:0035023       | regulation of Rho pr    | 0.20 | 1  | 0.07788162 | 6    | 0.01732752  |
| 19761 | GO:0043495       | protein anchor          | 0.20 | 1  | 0.07788162 | 6    | 0.01732752  |
| 20631 | GO:0044437       | vacuolar part           | 0.20 | 1  | 0.07788162 | 6    | 0.01732752  |
| 21727 | GO:0046165       | alcohol biosynthetic    | 0.20 | 1  | 0.07788162 | 6    | 0.01732752  |
| 21893 | GO:0046364       | monosaccharide bios     | 0.20 | 1  | 0.07788162 | 6    | 0.01732752  |
| 26030 | GO:0051748       | UTP-monosaccharid       | 0.20 | 1  | 0.07788162 | 6    | 0.01732752  |
| 5     | GO:0000007       | low-affinity zinc ion t | 0.20 | 1  | 0.07788162 | 6    | 0.01732752  |
| 135   | GO:0000170       | sphingosine hydroxy     | 0.20 | 1  | 0.07788162 | 6    | 0.01732752  |
| 2688  | GO:0003838       | sterol 24-C-methyltra   | 0.20 | 1  | 0.07788162 | 6    | 0.01732752  |
| 2713  | GO:0003863       | 3-methyl-2-oxobutan     | 0.20 | 1  | 0.07788162 | 6    | 0.01732752  |
| 3718  | GO:0005200       | structural constituent  | 0.20 | 3  | 0.23364486 | 42   | 0.121292636 |
| 6666  | GO:0009312       | oligosaccharide bios    | 0.20 | 3  | 0.23364486 | 42   | 0.121292636 |
| 8461  | GO:0015020 GO:00 | glucuronosyltransfer    | 0.20 | 3  | 0.23364486 | 42   | 0.121292636 |
| 9370  | GO:0016138       | glycoside biosynthes    | 0.20 | 3  | 0.23364486 | 42   | 0.121292636 |
| 21880 | GO:0046351       | disaccharide biosynt    | 0.20 | 3  | 0.23364486 | 42   | 0.121292636 |
| 13656 | GO:0031224       | intrinsic to membran    | 0.20 | 50 | 3.894081   | 1193 | 3.4452884   |
| 8679  | GO:0015297       | antipporter activity    | 0.20 | 8  | 0.62305295 | 152  | 0.4389638   |
| 8682  | GO:0015300       | solute:solute antipor   | 0.20 | 8  | 0.62305295 | 152  | 0.4389638   |
| 17016 | GO:0034637       | cellular carbohydrate   | 0.21 | 4  | 0.31152648 | 63   | 0.18193895  |
| 3662  | GO:0005126       | cytokine receptor bir   | 0.21 | 2  | 0.15576324 | 23   | 0.06642216  |
| 22753 | GO:0047262 GO:00 | polygalacturonate 4-    | 0.21 | 2  | 0.15576324 | 23   | 0.06642216  |
| 9293  | GO:0016051 GO:00 | carbohydrate biosyn     | 0.21 | 4  | 0.31152648 | 64   | 0.18482687  |
| 4914  | GO:0006816       | calcium ion transport   | 0.22 | 3  | 0.23364486 | 44   | 0.12706847  |
| 28952 | GO:0070588       | calcium ion transme     | 0.22 | 3  | 0.23364486 | 44   | 0.12706847  |
| 29859 | GO:0071495       | cellular carbohydrate   | 0.22 | 3  | 0.23364486 | 44   | 0.12706847  |
| 2821  | GO:0004012 GO:00 | phospholipid-translo    | 0.22 | 2  | 0.15576324 | 24   | 0.06931008  |
| 8559  | GO:0015146       | pentose transmembr      | 0.22 | 2  | 0.15576324 | 24   | 0.06931008  |

|       |                   |                          |      |    |            |      |             |
|-------|-------------------|--------------------------|------|----|------------|------|-------------|
| 8561  | GO:0015148        | D-xylose transmembr      | 0.22 | 2  | 0.15576324 | 24   | 0.06931008  |
| 8829  | GO:0015519        | D-xylose:hydrogen s      | 0.22 | 2  | 0.15576324 | 24   | 0.06931008  |
| 9019  | GO:0015750        | pentose transport        | 0.22 | 2  | 0.15576324 | 24   | 0.06931008  |
| 9022  | GO:0015753        | D-xylose transport       | 0.22 | 2  | 0.15576324 | 24   | 0.06931008  |
| 2945  | GO:0004143        | diacylglycerol kinase    | 0.23 | 1  | 0.07788162 | 7    | 0.020215439 |
| 4260  | GO:0006022        | aminoglycan metabo       | 0.23 | 1  | 0.07788162 | 7    | 0.020215439 |
| 6527  | GO:0009163        | nucleoside biosynthe     | 0.23 | 1  | 0.07788162 | 7    | 0.020215439 |
| 18796 | GO:0042451        | purine nucleoside bio    | 0.23 | 1  | 0.07788162 | 7    | 0.020215439 |
| 18800 | GO:0042455        | ribonucleoside biosy     | 0.23 | 1  | 0.07788162 | 7    | 0.020215439 |
| 19401 | GO:0043094        | cellular metabolic co    | 0.23 | 1  | 0.07788162 | 7    | 0.020215439 |
| 21695 | GO:0046129        | purine ribonucleosid     | 0.23 | 1  | 0.07788162 | 7    | 0.020215439 |
| 8666  | GO:0015276        | ligand-gated ion cha     | 0.23 | 3  | 0.23364486 | 45   | 0.1299564   |
| 12530 | GO:0022834        | ligand-gated channe      | 0.23 | 3  | 0.23364486 | 45   | 0.1299564   |
| 31431 | GO:0080054        | low affinity nitrate tra | 0.23 | 3  | 0.23364486 | 45   | 0.1299564   |
| 3888  | GO:0005529        | sugar binding            | 0.23 | 8  | 0.62305295 | 158  | 0.45629135  |
| 5070  | GO:0007017        | microtubule-based p      | 0.24 | 6  | 0.46728972 | 112  | 0.32344702  |
| 5071  | GO:0007018        | microtubule-based m      | 0.24 | 6  | 0.46728972 | 112  | 0.32344702  |
| 9846  | GO:0016799        | hydrolase activity, hy   | 0.24 | 2  | 0.15576324 | 25   | 0.072197996 |
| 31493 | GO:0080118        | brassinosteroid sulf     | 0.24 | 2  | 0.15576324 | 25   | 0.072197996 |
| 973   | GO:0001653        | peptide receptor acti    | 0.24 | 2  | 0.15576324 | 25   | 0.072197996 |
| 6999  | GO:0009733        | response to auxin sti    | 0.24 | 3  | 0.23364486 | 46   | 0.13284431  |
| 20652 | GO:0044459        | plasma membrane p        | 0.24 | 3  | 0.23364486 | 46   | 0.13284431  |
| 5909  | GO:0008415        | acyltransferase activ    | 0.25 | 15 | 1.1682243  | 330  | 0.95301354  |
| 3415  | GO:0004805        | trehalose-phosphata      | 0.25 | 2  | 0.15576324 | 26   | 0.075085916 |
| 17147 | GO:0034768        | (E)-beta-ocimene sy      | 0.25 | 2  | 0.15576324 | 26   | 0.075085916 |
| 4773  | GO:0006650 GO:000 | glycerophospholipid      | 0.25 | 3  | 0.23364486 | 47   | 0.13573223  |
| 22010 | GO:0046486        | glycerolipid metaboli    | 0.25 | 3  | 0.23364486 | 47   | 0.13573223  |
| 31420 | GO:0080043        | quercetin 3-O-glucos     | 0.25 | 4  | 0.31152648 | 69   | 0.19926646  |
| 3098  | GO:0004427        | inorganic diphospha      | 0.26 | 1  | 0.07788162 | 8    | 0.023103358 |
| 4778  | GO:0006656        | phosphatidylcholine      | 0.26 | 1  | 0.07788162 | 8    | 0.023103358 |
| 4779  | GO:0006657        | CDP-choline pathwa       | 0.26 | 1  | 0.07788162 | 8    | 0.023103358 |
| 5753  | GO:0008216        | spermidine metaboli      | 0.26 | 1  | 0.07788162 | 8    | 0.023103358 |
| 5815  | GO:0008295        | spermidine biosynthe     | 0.26 | 1  | 0.07788162 | 8    | 0.023103358 |
| 6262  | GO:0008865        | fructokinase activity    | 0.26 | 1  | 0.07788162 | 8    | 0.023103358 |
| 7779  | GO:0010563        | negative regulation c    | 0.26 | 1  | 0.07788162 | 8    | 0.023103358 |
| 8725  | GO:0015367        | oxoglutarate:malate      | 0.26 | 1  | 0.07788162 | 8    | 0.023103358 |
| 9011  | GO:0015742        | alpha-ketoglutarate t    | 0.26 | 1  | 0.07788162 | 8    | 0.023103358 |
| 11209 | GO:0019206        | nucleoside kinase ac     | 0.26 | 1  | 0.07788162 | 8    | 0.023103358 |
| 11213 | GO:0019210        | kinase inhibitor activ   | 0.26 | 1  | 0.07788162 | 8    | 0.023103358 |
| 12736 | GO:0030165        | PDZ domain binding       | 0.26 | 1  | 0.07788162 | 8    | 0.023103358 |
| 13262 | GO:0030795 GO:004 | jasmonate O-methyl       | 0.26 | 1  | 0.07788162 | 8    | 0.023103358 |
| 18675 | GO:0042326        | negative regulation c    | 0.26 | 1  | 0.07788162 | 8    | 0.023103358 |
| 18785 | GO:0042439        | ethanolamine-contai      | 0.26 | 1  | 0.07788162 | 8    | 0.023103358 |
| 21504 | GO:0045936        | negative regulation c    | 0.26 | 1  | 0.07788162 | 8    | 0.023103358 |
| 21995 | GO:0046470        | phosphatidylcholine      | 0.26 | 1  | 0.07788162 | 8    | 0.023103358 |
| 22076 | GO:0046556        | alpha-N-arabinofuraf     | 0.26 | 1  | 0.07788162 | 8    | 0.023103358 |
| 22702 | GO:0047209        | coniferyl-alcohol gluc   | 0.26 | 1  | 0.07788162 | 8    | 0.023103358 |
| 23264 | GO:0047782        | coniferin beta-glucos    | 0.26 | 1  | 0.07788162 | 8    | 0.023103358 |
| 28933 | GO:0070569        | uridylyltransferase a    | 0.26 | 1  | 0.07788162 | 8    | 0.023103358 |
| 4     | GO:0000006        | high affinity zinc upte  | 0.26 | 1  | 0.07788162 | 8    | 0.023103358 |
| 11    | GO:0000015        | phosphopyruvate hyd      | 0.26 | 1  | 0.07788162 | 8    | 0.023103358 |
| 47    | GO:0000062        | fatty-acyl-CoA bindin    | 0.26 | 1  | 0.07788162 | 8    | 0.023103358 |
| 2728  | GO:0003878 GO:004 | ATP citrate synthase     | 0.26 | 1  | 0.07788162 | 8    | 0.023103358 |
| 15524 | GO:0033124        | regulation of GTP ca     | 0.26 | 4  | 0.31152648 | 70   | 0.20215438  |
| 19394 | GO:0043087        | regulation of GTPase     | 0.26 | 4  | 0.31152648 | 70   | 0.20215438  |
| 4188  | GO:0005938        | cell cortex              | 0.26 | 3  | 0.23364486 | 48   | 0.13862015  |
| 20642 | GO:0044448        | cell cortex part         | 0.26 | 3  | 0.23364486 | 48   | 0.13862015  |
| 113   | GO:0000145        | exocyst                  | 0.26 | 3  | 0.23364486 | 48   | 0.13862015  |
| 3724  | GO:0005216        | ion channel activity     | 0.26 | 7  | 0.5451713  | 140  | 0.40430877  |
| 3895  | GO:0005543        | phospholipid binding     | 0.26 | 7  | 0.5451713  | 140  | 0.40430877  |
| 3725  | GO:0005217        | intracellular ligand-g   | 0.26 | 2  | 0.15576324 | 27   | 0.077973835 |
| 3808  | GO:0005351 GO:000 | sugar:hydrogen sym       | 0.27 | 5  | 0.3894081  | 94   | 0.27146447  |
| 3835  | GO:0005402        | cation:sugar symport     | 0.27 | 5  | 0.3894081  | 94   | 0.27146447  |
| 3756  | GO:0005261 GO:000 | cation channel activi    | 0.27 | 3  | 0.23364486 | 49   | 0.14150807  |
| 9725  | GO:0016645        | oxidoreductase activ     | 0.27 | 3  | 0.23364486 | 49   | 0.14150807  |
| 18633 | GO:0042277        | peptide binding          | 0.28 | 5  | 0.3894081  | 95   | 0.27435237  |
| 3744  | GO:0005244        | voltage-gated ion ch     | 0.28 | 4  | 0.31152648 | 72   | 0.20793022  |
| 12528 | GO:0022832        | voltage-gated chann      | 0.28 | 4  | 0.31152648 | 72   | 0.20793022  |
| 15280 | GO:0032879        | regulation of localiza   | 0.28 | 4  | 0.31152648 | 72   | 0.20793022  |
| 17141 | GO:0034762        | regulation of transme    | 0.28 | 4  | 0.31152648 | 72   | 0.20793022  |
| 17144 | GO:0034765        | regulation of ion tran   | 0.28 | 4  | 0.31152648 | 72   | 0.20793022  |
| 19568 | GO:0043269        | regulation of ion tran   | 0.28 | 4  | 0.31152648 | 72   | 0.20793022  |
| 25348 | GO:0051049        | regulation of transpo    | 0.28 | 4  | 0.31152648 | 72   | 0.20793022  |
| 3332  | GO:0004711        | ribosomal protein S6     | 0.28 | 2  | 0.15576324 | 28   | 0.080861755 |
| 3812  | GO:0005355 GO:000 | glucose transmembr       | 0.28 | 2  | 0.15576324 | 28   | 0.080861755 |
| 9027  | GO:0015758        | glucose transport        | 0.28 | 2  | 0.15576324 | 28   | 0.080861755 |
| 716   | GO:0001071        | nucleic acid binding     | 0.28 | 57 | 4.4392524  | 1417 | 4.0921826   |
| 2643  | GO:0003700 GO:000 | sequence-specific D      | 0.28 | 57 | 4.4392524  | 1417 | 4.0921826   |
| 4304  | GO:0006066        | alcohol metabolic pr     | 0.28 | 7  | 0.5451713  | 143  | 0.41297254  |
| 7166  | GO:0009914        | hormone transport        | 0.28 | 3  | 0.23364486 | 50   | 0.14439599  |
| 9783  | GO:0016722        | oxidoreductase activ     | 0.28 | 3  | 0.23364486 | 50   | 0.14439599  |
| 27891 | GO:0060918        | auxin transport          | 0.28 | 3  | 0.23364486 | 50   | 0.14439599  |
| 29674 | GO:0071310        | cellular response to     | 0.28 | 3  | 0.23364486 | 50   | 0.14439599  |
| 31536 | GO:0080161        | auxin transmembran       | 0.28 | 3  | 0.23364486 | 50   | 0.14439599  |
| 2801  | GO:0003985        | acetyl-CoA C-acetyl      | 0.29 | 1  | 0.07788162 | 9    | 0.025991278 |
| 3251  | GO:0004611        | phosphoenolpyruvat       | 0.29 | 1  | 0.07788162 | 9    | 0.025991278 |
| 3625  | GO:0005080        | protein kinase C bind    | 0.29 | 1  | 0.07788162 | 9    | 0.025991278 |
| 3694  | GO:0005160        | transforming growth      | 0.29 | 1  | 0.07788162 | 9    | 0.025991278 |
| 4322  | GO:0006084        | acetyl-CoA metaboli      | 0.29 | 1  | 0.07788162 | 9    | 0.025991278 |
| 4332  | GO:0006099        | tricarboxylic acid cyc   | 0.29 | 1  | 0.07788162 | 9    | 0.025991278 |
| 6429  | GO:0009060        | aerobic respiration      | 0.29 | 1  | 0.07788162 | 9    | 0.025991278 |



|       |                  |                         |      |     |            |      |             |
|-------|------------------|-------------------------|------|-----|------------|------|-------------|
| 6476  | GO:0009109       | coenzyme catabolic      | 0.29 | 1   | 0.07788162 | 9    | 0.025991278 |
| 7506  | GO:0010279       | indole-3-acetic acid    | 0.29 | 1   | 0.07788162 | 9    | 0.025991278 |
| 9571  | GO:0016453       | C-acetyltransferase     | 0.29 | 1   | 0.07788162 | 9    | 0.025991278 |
| 11785 | GO:0019840       | isoprenoid binding      | 0.29 | 1   | 0.07788162 | 9    | 0.025991278 |
| 13224 | GO:0030755       | quercetin 3-O-methyl    | 0.29 | 1   | 0.07788162 | 9    | 0.025991278 |
| 15579 | GO:0033180       | proton-transporting V   | 0.29 | 1   | 0.07788162 | 9    | 0.025991278 |
| 19342 | GO:0043027       | caspase inhibitor act   | 0.29 | 1   | 0.07788162 | 9    | 0.025991278 |
| 19343 | GO:0043028       | caspase regulator ac    | 0.29 | 1   | 0.07788162 | 9    | 0.025991278 |
| 19458 | GO:0043154 GO:00 | negative regulation c   | 0.29 | 1   | 0.07788162 | 9    | 0.025991278 |
| 19579 | GO:0043281 GO:00 | regulation of caspas    | 0.29 | 1   | 0.07788162 | 9    | 0.025991278 |
| 21885 | GO:0046356       | acetyl-CoA catabolic    | 0.29 | 1   | 0.07788162 | 9    | 0.025991278 |
| 25484 | GO:0051187       | cofactor catabolic pr   | 0.29 | 1   | 0.07788162 | 9    | 0.025991278 |
| 17617 | GO:0035251       | UDP-glucosyltransfe     | 0.29 | 10  | 0.7788162  | 218  | 0.62956655  |
| 4427  | GO:0006221       | pyrimidine nucleotide   | 0.29 | 2   | 0.15576324 | 29   | 0.083749674 |
| 3311  | GO:0004683 GO:00 | calmodulin-depende      | 0.29 | 4   | 0.31152648 | 74   | 0.21370606  |
| 9832  | GO:0016782       | transferase activity, t | 0.29 | 4   | 0.31152648 | 74   | 0.21370606  |
| 8677  | GO:0015295       | solute:hydrogen sym     | 0.30 | 5   | 0.3894081  | 98   | 0.28301615  |
| 8810  | GO:0015491       | cation:cation antipor   | 0.30 | 4   | 0.31152648 | 75   | 0.21659398  |
| 2666  | GO:0003774       | motor activity          | 0.31 | 2   | 0.15576324 | 30   | 0.086637594 |
| 5732  | GO:0008194       | UDP-glycosyltransfe     | 0.31 | 14  | 1.0903426  | 322  | 0.9299102   |
| 3024  | GO:0004340       | glucokinase activity    | 0.31 | 1   | 0.07788162 | 10   | 0.0288792   |
| 3056  | GO:0004372       | glycine hydroxymeth     | 0.31 | 1   | 0.07788162 | 10   | 0.0288792   |
| 3813  | GO:0005356 GO:00 | hydrogen:glucose sy     | 0.31 | 1   | 0.07788162 | 10   | 0.0288792   |
| 3815  | GO:0005358       | high-affinity hydroge   | 0.31 | 1   | 0.07788162 | 10   | 0.0288792   |
| 3842  | GO:0005432       | calcium:sodium antip    | 0.31 | 1   | 0.07788162 | 10   | 0.0288792   |
| 3849  | GO:0005459       | UDP-galactose trans     | 0.31 | 1   | 0.07788162 | 10   | 0.0288792   |
| 3871  | GO:0005504       | fatty acid binding      | 0.31 | 1   | 0.07788162 | 10   | 0.0288792   |
| 4309  | GO:0006071       | glycerol metabolic pr   | 0.31 | 1   | 0.07788162 | 10   | 0.0288792   |
| 4724  | GO:0006596       | polyamine biosynthe     | 0.31 | 1   | 0.07788162 | 10   | 0.0288792   |
| 5678  | GO:0008113 GO:00 | peptide-methionine-(    | 0.31 | 1   | 0.07788162 | 10   | 0.0288792   |
| 6464  | GO:0009095       | aromatic amino acid     | 0.31 | 1   | 0.07788162 | 10   | 0.0288792   |
| 6947  | GO:0009679       | hexose:hydrogen syr     | 0.31 | 1   | 0.07788162 | 10   | 0.0288792   |
| 8727  | GO:0015369       | calcium:hydrogen an     | 0.31 | 1   | 0.07788162 | 10   | 0.0288792   |
| 9054  | GO:0015785       | UDP-galactose trans     | 0.31 | 1   | 0.07788162 | 10   | 0.0288792   |
| 9828  | GO:0016778       | diphosphotransferas     | 0.31 | 1   | 0.07788162 | 10   | 0.0288792   |
| 11391 | GO:0019400       | alditol metabolic pro   | 0.31 | 1   | 0.07788162 | 10   | 0.0288792   |
| 11715 | GO:0019751       | polyol metabolic pro    | 0.31 | 1   | 0.07788162 | 10   | 0.0288792   |
| 13472 | GO:0031013       | tropoin I binding       | 0.31 | 1   | 0.07788162 | 10   | 0.0288792   |
| 17563 | GO:0035197       | siRNA binding           | 0.31 | 1   | 0.07788162 | 10   | 0.0288792   |
| 25453 | GO:0051156 GO:00 | glucose 6-phosphate     | 0.31 | 1   | 0.07788162 | 10   | 0.0288792   |
| 26069 | GO:0051787       | misfolded protein bir   | 0.31 | 1   | 0.07788162 | 10   | 0.0288792   |
| 26975 | GO:0060001       | minus-end directed r    | 0.31 | 1   | 0.07788162 | 10   | 0.0288792   |
| 29215 | GO:0070851       | growth factor recept    | 0.31 | 1   | 0.07788162 | 10   | 0.0288792   |
| 30693 | GO:0072334       | UDP-galactose trans     | 0.31 | 1   | 0.07788162 | 10   | 0.0288792   |
| 31441 | GO:0080065       | 4-alpha-methyl-delta    | 0.31 | 1   | 0.07788162 | 10   | 0.0288792   |
| 114   | GO:0000146       | microfilament motor     | 0.31 | 1   | 0.07788162 | 10   | 0.0288792   |
| 196   | GO:0000254       | C-4 methylsterol oxi    | 0.31 | 1   | 0.07788162 | 10   | 0.0288792   |
| 9494  | GO:0016311       | dephosphorylation       | 0.32 | 18  | 1.4018692  | 425  | 1.227366    |
| 26959 | GO:0055114       | oxidation-reduction p   | 0.32 | 97  | 7.5545173  | 2490 | 7.1909204   |
| 9877  | GO:0016838       | carbon-oxygen lyase     | 0.32 | 4   | 0.31152648 | 77   | 0.22236982  |
| 14422 | GO:0032012       | regulation of ARF pr    | 0.32 | 2   | 0.15576324 | 31   | 0.08952551  |
| 14720 | GO:0032312       | regulation of ARF G     | 0.32 | 2   | 0.15576324 | 31   | 0.08952551  |
| 30884 | GO:0072528       | pyrimidine-containin    | 0.32 | 2   | 0.15576324 | 31   | 0.08952551  |
| 30066 | GO:0071702       | organic substance tr    | 0.32 | 22  | 1.7133956  | 529  | 1.5277096   |
| 29251 | GO:0070887       | cellular response to    | 0.32 | 3   | 0.23364486 | 54   | 0.15594767  |
| 5874  | GO:0008374       | O-acyltransferase ac    | 0.33 | 5   | 0.3894081  | 102  | 0.29456782  |
| 12794 | GO:0030234       | enzyme regulator ac     | 0.33 | 17  | 1.3239875  | 403  | 1.1638317   |
| 30865 | GO:0072509       | divalent inorganic ca   | 0.33 | 4   | 0.31152648 | 78   | 0.22525774  |
| 25095 | GO:0050790       | regulation of catalyti  | 0.33 | 20  | 1.5576324  | 480  | 1.3862015   |
| 3717  | GO:0005199       | structural constituent  | 0.33 | 2   | 0.15576324 | 32   | 0.09241343  |
| 9533  | GO:0016405       | CoA-ligase activity     | 0.33 | 3   | 0.23364486 | 55   | 0.15883559  |
| 5733  | GO:0008195 GO:00 | phosphatidate phosph    | 0.34 | 1   | 0.07788162 | 11   | 0.03176712  |
| 11152 | GO:0019139 GO:00 | cytokinin dehydroge     | 0.34 | 1   | 0.07788162 | 11   | 0.03176712  |
| 16183 | GO:0033799       | myricetin 3'-O-methyl   | 0.34 | 1   | 0.07788162 | 11   | 0.03176712  |
| 24696 | GO:0050378       | UDP-glucuronate 4-ep    | 0.34 | 1   | 0.07788162 | 11   | 0.03176712  |
| 2669  | GO:0003785       | actin monomer bindi     | 0.34 | 1   | 0.07788162 | 11   | 0.03176712  |
| 28366 | GO:0065009       | regulation of molecu    | 0.34 | 20  | 1.5576324  | 484  | 1.3977532   |
| 4224  | GO:0005984       | disaccharide metabo     | 0.34 | 3   | 0.23364486 | 56   | 0.16172351  |
| 9369  | GO:0016137       | glycoside metabolic     | 0.34 | 3   | 0.23364486 | 56   | 0.16172351  |
| 4358  | GO:0006140       | regulation of nucleot   | 0.35 | 4   | 0.31152648 | 80   | 0.2310336   |
| 7146  | GO:0009894       | regulation of catabol   | 0.35 | 4   | 0.31152648 | 80   | 0.2310336   |
| 9682  | GO:0016597       | amino acid binding      | 0.35 | 4   | 0.31152648 | 80   | 0.2310336   |
| 13278 | GO:0030811       | regulation of nucleot   | 0.35 | 4   | 0.31152648 | 80   | 0.2310336   |
| 13759 | GO:0031329       | regulation of cellular  | 0.35 | 4   | 0.31152648 | 80   | 0.2310336   |
| 15521 | GO:0033121       | regulation of purine r  | 0.35 | 4   | 0.31152648 | 80   | 0.2310336   |
| 19479 | GO:0043176       | amine binding           | 0.35 | 4   | 0.31152648 | 80   | 0.2310336   |
| 4705  | GO:0006576       | cellular biogenic ami   | 0.35 | 2   | 0.15576324 | 33   | 0.09530135  |
| 9576  | GO:0016459       | myosin complex          | 0.35 | 2   | 0.15576324 | 33   | 0.09530135  |
| 8943  | GO:0015672       | monovalent inorgani     | 0.35 | 16  | 1.2461059  | 383  | 1.1060733   |
| 6166  | GO:0008757       | S-adenosylmethionin     | 0.35 | 8   | 0.62305295 | 180  | 0.5198256   |
| 7557  | GO:0010333       | terpene synthase ac     | 0.35 | 3   | 0.23364486 | 57   | 0.16461143  |
| 9910  | GO:0016878       | acid-thiol ligase activ | 0.35 | 3   | 0.23364486 | 57   | 0.16461143  |
| 9266  | GO:0016020       | membrane                | 0.36 | 143 | 11.137072  | 3741 | 10.803708   |
| 3749  | GO:0005249       | voltage-gated potass    | 0.36 | 2   | 0.15576324 | 34   | 0.09818927  |
| 5827  | GO:0008308 GO:00 | voltage-gated anion     | 0.36 | 2   | 0.15576324 | 34   | 0.09818927  |
| 6486  | GO:0009119       | ribonucleoside meta     | 0.36 | 2   | 0.15576324 | 34   | 0.09818927  |
| 11203 | GO:0019200       | carbohydrate kinase     | 0.36 | 2   | 0.15576324 | 34   | 0.09818927  |
| 20321 | GO:0044070       | regulation of anion tr  | 0.36 | 2   | 0.15576324 | 34   | 0.09818927  |
| 22341 | GO:0046835       | carbohydrate phosph     | 0.36 | 2   | 0.15576324 | 34   | 0.09818927  |
| 29202 | GO:0070838       | divalent metal ion tra  | 0.36 | 4   | 0.31152648 | 82   | 0.23680943  |
| 3037  | GO:0004353       | glutamate dehydroge     | 0.36 | 1   | 0.07788162 | 12   | 0.03465504  |

|       |                   |                        |      |    |            |     |             |
|-------|-------------------|------------------------|------|----|------------|-----|-------------|
| 3386  | GO:0004773        | sterol-sulfatase activ | 0.36 | 1  | 0.07788162 | 12  | 0.03465504  |
| 4506  | GO:0006313 GO:000 | transposition, DNA-r   | 0.36 | 1  | 0.07788162 | 12  | 0.03465504  |
| 4786  | GO:0006664        | glycolipid metabolic   | 0.36 | 1  | 0.07788162 | 12  | 0.03465504  |
| 5965  | GO:0008484        | sulfuric ester hydroly | 0.36 | 1  | 0.07788162 | 12  | 0.03465504  |
| 6024  | GO:0008574        | plus-end-directed mi   | 0.36 | 1  | 0.07788162 | 12  | 0.03465504  |
| 6610  | GO:0009247        | glycolipid biosynthet  | 0.36 | 1  | 0.07788162 | 12  | 0.03465504  |
| 14604 | GO:0032196        | transposition          | 0.36 | 1  | 0.07788162 | 12  | 0.03465504  |
| 14674 | GO:0032266        | phosphatidylinositol-  | 0.36 | 1  | 0.07788162 | 12  | 0.03465504  |
| 16148 | GO:0033764        | steroid dehydrogena    | 0.36 | 1  | 0.07788162 | 12  | 0.03465504  |
| 19047 | GO:0042723        | thiamine-containing    | 0.36 | 1  | 0.07788162 | 12  | 0.03465504  |
| 19048 | GO:0042724        | thiamine-containing    | 0.36 | 1  | 0.07788162 | 12  | 0.03465504  |
| 20943 | GO:0045333        | cellular respiration   | 0.36 | 1  | 0.07788162 | 12  | 0.03465504  |
| 21992 | GO:0046467        | membrane lipid bios    | 0.36 | 1  | 0.07788162 | 12  | 0.03465504  |
| 25436 | GO:0051139        | metal ion:hydrogen a   | 0.36 | 1  | 0.07788162 | 12  | 0.03465504  |
| 31380 | GO:0080002        | UDP-glucose:4-amin     | 0.36 | 1  | 0.07788162 | 12  | 0.03465504  |
| 29    | GO:0000036        | acyl carrier activity  | 0.36 | 1  | 0.07788162 | 12  | 0.03465504  |
| 3323  | GO:0004702        | receptor signaling pr  | 0.36 | 3  | 0.23364486 | 58  | 0.16749935  |
| 6665  | GO:0009311        | oligosaccharide met    | 0.36 | 3  | 0.23364486 | 58  | 0.16749935  |
| 8028  | GO:0010817        | regulation of hormon   | 0.36 | 3  | 0.23364486 | 58  | 0.16749935  |
| 4954  | GO:0006869        | lipid transport        | 0.37 | 9  | 0.7009346  | 208 | 0.6006873   |
| 8085  | GO:0010876        | lipid localization     | 0.37 | 9  | 0.7009346  | 208 | 0.6006873   |
| 4426  | GO:0006220        | pyrimidine nucleotid   | 0.37 | 2  | 0.15576324 | 35  | 0.10107719  |
| 11206 | GO:0019203        | carbohydrate phosph    | 0.37 | 2  | 0.15576324 | 35  | 0.10107719  |
| 22012 | GO:0046488 GO:003 | phosphatidylinositol   | 0.37 | 2  | 0.15576324 | 35  | 0.10107719  |
| 30700 | GO:0072341        | modified amino acid    | 0.37 | 3  | 0.23364486 | 59  | 0.17038727  |
| 3048  | GO:0004364        | glutathione transfer   | 0.38 | 4  | 0.31152648 | 84  | 0.24258527  |
| 30867 | GO:0072511        | divalent inorganic ca  | 0.38 | 4  | 0.31152648 | 84  | 0.24258527  |
| 9393  | GO:0016165        | lipoygenase activity   | 0.39 | 2  | 0.15576324 | 36  | 0.10396511  |
| 12626 | GO:0030029        | actin filament-based   | 0.39 | 2  | 0.15576324 | 36  | 0.10396511  |
| 12633 | GO:0030036        | actin cytoskeleton or  | 0.39 | 2  | 0.15576324 | 36  | 0.10396511  |
| 6436  | GO:0009067        | aspartate family ami   | 0.39 | 1  | 0.07788162 | 13  | 0.037542958 |
| 8149  | GO:0010941        | regulation of cell de  | 0.39 | 1  | 0.07788162 | 13  | 0.037542958 |
| 8578  | GO:0015165        | pyrimidine nucleotid   | 0.39 | 1  | 0.07788162 | 13  | 0.037542958 |
| 9050  | GO:0015781        | pyrimidine nucleotid   | 0.39 | 1  | 0.07788162 | 13  | 0.037542958 |
| 18634 | GO:0042278        | purine nucleoside m    | 0.39 | 1  | 0.07788162 | 13  | 0.037542958 |
| 19298 | GO:0042981        | regulation of apoptos  | 0.39 | 1  | 0.07788162 | 13  | 0.037542958 |
| 19381 | GO:0043067 GO:004 | regulation of prograr  | 0.39 | 1  | 0.07788162 | 13  | 0.037542958 |
| 20923 | GO:0045309        | protein phosphorylat   | 0.39 | 1  | 0.07788162 | 13  | 0.037542958 |
| 21694 | GO:0046128        | purine ribonucleosid   | 0.39 | 1  | 0.07788162 | 13  | 0.037542958 |
| 25118 | GO:0050815        | phosphoserine bindi    | 0.39 | 1  | 0.07788162 | 13  | 0.037542958 |
| 4768  | GO:0006644        | phospholipid metabo    | 0.40 | 3  | 0.23364486 | 61  | 0.1761631   |
| 8680  | GO:0015298        | solute:cation antipor  | 0.40 | 5  | 0.3894081  | 112 | 0.32344702  |
| 29918 | GO:0071554        | cell wall organizator  | 0.40 | 5  | 0.3894081  | 112 | 0.32344702  |
| 4670  | GO:0006541        | glutamine metabolic    | 0.41 | 1  | 0.07788162 | 14  | 0.040430877 |
| 4723  | GO:0006595        | polyamine metabolic    | 0.41 | 1  | 0.07788162 | 14  | 0.040430877 |
| 5875  | GO:0008375        | acetylglucosaminyltr   | 0.41 | 1  | 0.07788162 | 14  | 0.040430877 |
| 8553  | GO:0015140        | malate transmembra     | 0.41 | 1  | 0.07788162 | 14  | 0.040430877 |
| 8859  | GO:0015556        | C4-dicarboxylate tra   | 0.41 | 1  | 0.07788162 | 14  | 0.040430877 |
| 9009  | GO:0015740        | C4-dicarboxylate tra   | 0.41 | 1  | 0.07788162 | 14  | 0.040430877 |
| 9012  | GO:0015743        | malate transport       | 0.41 | 1  | 0.07788162 | 14  | 0.040430877 |
| 9399  | GO:0016174        | NAD(P)H oxidase ac     | 0.41 | 1  | 0.07788162 | 14  | 0.040430877 |
| 9433  | GO:0016229        | steroid dehydrogena    | 0.41 | 1  | 0.07788162 | 14  | 0.040430877 |
| 9711  | GO:0016629        | 12-oxophytodienoate    | 0.41 | 1  | 0.07788162 | 14  | 0.040430877 |
| 20671 | GO:0045017        | glycerolipid biosynth  | 0.41 | 1  | 0.07788162 | 14  | 0.040430877 |
| 20791 | GO:0045153        | electron transporter,  | 0.41 | 1  | 0.07788162 | 14  | 0.040430877 |
| 21998 | GO:0046474        | glycerophospholipid    | 0.41 | 1  | 0.07788162 | 14  | 0.040430877 |
| 24970 | GO:0050664        | oxidoreductase activ   | 0.41 | 1  | 0.07788162 | 14  | 0.040430877 |
| 25040 | GO:0050734        | hydroxycinnamoyltra    | 0.41 | 1  | 0.07788162 | 14  | 0.040430877 |
| 29787 | GO:0071423        | malate transmembra     | 0.41 | 1  | 0.07788162 | 14  | 0.040430877 |
| 270   | GO:0000339        | RNA cap binding        | 0.41 | 1  | 0.07788162 | 14  | 0.040430877 |
| 20624 | GO:0044430        | cytoskeletal part      | 0.41 | 4  | 0.31152648 | 88  | 0.25413695  |
| 19533 | GO:0043234        | protein complex        | 0.41 | 33 | 2.5700934  | 848 | 2.448956    |
| 5066  | GO:0007010        | cytoskeleton organiz   | 0.41 | 2  | 0.15576324 | 38  | 0.10974095  |
| 6749  | GO:0009414        | response to water de   | 0.41 | 2  | 0.15576324 | 38  | 0.10974095  |
| 8588  | GO:0015175        | neutral amino acid tr  | 0.41 | 2  | 0.15576324 | 38  | 0.10974095  |
| 9073  | GO:0015804        | neutral amino acid tr  | 0.41 | 2  | 0.15576324 | 38  | 0.10974095  |
| 12538 | GO:0022843        | voltage-gated cation   | 0.41 | 2  | 0.15576324 | 38  | 0.10974095  |
| 9535  | GO:0016407        | acetyltransferase ac   | 0.42 | 5  | 0.3894081  | 115 | 0.3321108   |
| 8676  | GO:0015294        | solute:cation sympor   | 0.42 | 6  | 0.46728972 | 141 | 0.4071967   |
| 30883 | GO:0072527        | pyrimidine-containing  | 0.43 | 2  | 0.15576324 | 39  | 0.11262887  |
| 2868  | GO:0004062        | aryl sulfotransferase  | 0.43 | 1  | 0.07788162 | 15  | 0.043318797 |
| 7520  | GO:0010294        | abscisic acid glucos   | 0.43 | 1  | 0.07788162 | 15  | 0.043318797 |
| 8635  | GO:0015229        | L-ascorbic acid trans  | 0.43 | 1  | 0.07788162 | 15  | 0.043318797 |
| 8740  | GO:0015386        | potassium:hydrogen     | 0.43 | 1  | 0.07788162 | 15  | 0.043318797 |
| 9144  | GO:0015882        | L-ascorbic acid trans  | 0.43 | 1  | 0.07788162 | 15  | 0.043318797 |
| 9536  | GO:0016408        | C-acyltransferase ac   | 0.43 | 1  | 0.07788162 | 15  | 0.043318797 |
| 12523 | GO:0022821        | potassium ion antipo   | 0.43 | 1  | 0.07788162 | 15  | 0.043318797 |
| 11616 | GO:0019637        | organophosphate me     | 0.44 | 3  | 0.23364486 | 65  | 0.18771479  |
| 20512 | GO:0044262 GO:004 | cellular carbohydrate  | 0.44 | 10 | 0.7788162  | 248 | 0.7162041   |
| 11829 | GO:0019900        | kinase binding         | 0.44 | 3  | 0.23364486 | 66  | 0.1906027   |
| 3638  | GO:0005096        | GTPase activator ac    | 0.45 | 2  | 0.15576324 | 41  | 0.118404716 |
| 19813 | GO:0043547        | positive regulation of | 0.45 | 2  | 0.15576324 | 41  | 0.118404716 |
| 20627 | GO:0044433        | cytoplasmic vesicle    | 0.45 | 2  | 0.15576324 | 41  | 0.118404716 |
| 3742  | GO:0005242        | inward rectifier potas | 0.45 | 1  | 0.07788162 | 16  | 0.046206716 |
| 3782  | GO:0005310 GO:004 | dicarboxylic acid tra  | 0.45 | 1  | 0.07788162 | 16  | 0.046206716 |
| 4767  | GO:0006643        | membrane lipid met     | 0.45 | 1  | 0.07788162 | 16  | 0.046206716 |
| 4928  | GO:0006835 GO:004 | dicarboxylic acid tra  | 0.45 | 1  | 0.07788162 | 16  | 0.046206716 |
| 5691  | GO:0008131 GO:004 | primary amine oxida    | 0.45 | 1  | 0.07788162 | 16  | 0.046206716 |
| 5995  | GO:0008524        | glucose 6-phosphate    | 0.45 | 1  | 0.07788162 | 16  | 0.046206716 |
| 7521  | GO:0010295        | (+)-abscisic acid 8'-H | 0.45 | 1  | 0.07788162 | 16  | 0.046206716 |
| 8694  | GO:0015315        | organophosphate:ind    | 0.45 | 1  | 0.07788162 | 16  | 0.046206716 |



|       |                  |                         |      |     |            |       |             |
|-------|------------------|-------------------------|------|-----|------------|-------|-------------|
| 9189  | GO:0015929       | hexosaminidase acti     | 0.45 | 1   | 0.07788162 | 16    | 0.046206716 |
| 9797  | GO:0016742       | hydroxymethyl-, form    | 0.45 | 1   | 0.07788162 | 16    | 0.046206716 |
| 9898  | GO:0016863       | intramolecular oxid     | 0.45 | 1   | 0.07788162 | 16    | 0.046206716 |
| 18757 | GO:0042409       | caffeoyl-CoA O-mett     | 0.45 | 1   | 0.07788162 | 16    | 0.046206716 |
| 18899 | GO:0042562       | hormone binding         | 0.45 | 1   | 0.07788162 | 16    | 0.046206716 |
| 31396 | GO:0080019       | fatty-acyl-CoA reduc    | 0.45 | 1   | 0.07788162 | 16    | 0.046206716 |
| 2667  | GO:0003777       | microtubule motor ad    | 0.45 | 1   | 0.07788162 | 16    | 0.046206716 |
| 22479 | GO:0046983       | protein dimerization    | 0.46 | 20  | 1.5576324  | 517   | 1.4930545   |
| 3873  | GO:0005507       | copper ion binding      | 0.46 | 6   | 0.46728972 | 146   | 0.42163628  |
| 8675  | GO:0015293       | symporter activity      | 0.46 | 7   | 0.5451713  | 173   | 0.49961013  |
| 7229  | GO:0009987 GO:00 | cellular process        | 0.46 | 395 | 30.76324   | 10601 | 30.614838   |
| 3753  | GO:0005253       | anion channel activit   | 0.46 | 2   | 0.15576324 | 42    | 0.121292636 |
| 5607  | GO:0008022       | protein C-terminus b    | 0.46 | 2   | 0.15576324 | 42    | 0.121292636 |
| 3620  | GO:0005057       | receptor signaling pr   | 0.47 | 3   | 0.23364486 | 69    | 0.19926646  |
| 4135  | GO:0005875       | microtubule associat    | 0.47 | 1   | 0.07788162 | 17    | 0.049094636 |
| 8585  | GO:0015172       | acidic amino acid tra   | 0.47 | 1   | 0.07788162 | 17    | 0.049094636 |
| 9069  | GO:0015800       | acidic amino acid tra   | 0.47 | 1   | 0.07788162 | 17    | 0.049094636 |
| 30887 | GO:0072531       | pyrimidine-containin    | 0.47 | 1   | 0.07788162 | 17    | 0.049094636 |
| 3900  | GO:0005548 GO:00 | phospholipid transp     | 0.48 | 2   | 0.15576324 | 43    | 0.124180555 |
| 9174  | GO:0015914       | phospholipid transp     | 0.48 | 2   | 0.15576324 | 43    | 0.124180555 |
| 13833 | GO:0031410       | cytoplasmic vesicle     | 0.48 | 2   | 0.15576324 | 43    | 0.124180555 |
| 14393 | GO:0031982       | vesicle                 | 0.48 | 2   | 0.15576324 | 43    | 0.124180555 |
| 9579  | GO:0016462       | pyrophosphatase ac      | 0.48 | 36  | 2.8037384  | 954   | 2.7550755   |
| 9191  | GO:0015931       | nucleobase, nucleos     | 0.48 | 3   | 0.23364486 | 70    | 0.20215438  |
| 9192  | GO:0015932       | nucleobase, nucleos     | 0.48 | 3   | 0.23364486 | 70    | 0.20215438  |
| 9859  | GO:0016818       | hydrolase activity, ac  | 0.49 | 36  | 2.8037384  | 956   | 2.7608514   |
| 9753  | GO:0016682       | oxidoreductase activ    | 0.49 | 2   | 0.15576324 | 44    | 0.12706847  |
| 2642  | GO:0003697 GO:00 | single-stranded DNA     | 0.49 | 2   | 0.15576324 | 44    | 0.12706847  |
| 3832  | GO:0005388       | calcium-transporting    | 0.49 | 1   | 0.07788162 | 18    | 0.051982556 |
| 4134  | GO:0005874       | microtubule             | 0.49 | 1   | 0.07788162 | 18    | 0.051982556 |
| 4252  | GO:0006014       | D-ribose metabolic p    | 0.49 | 1   | 0.07788162 | 18    | 0.051982556 |
| 8662  | GO:0015271       | outward rectifier pot   | 0.49 | 1   | 0.07788162 | 18    | 0.051982556 |
| 9726  | GO:0016646       | oxidoreductase activ    | 0.49 | 1   | 0.07788162 | 18    | 0.051982556 |
| 12887 | GO:0030332       | cyclin binding          | 0.49 | 1   | 0.07788162 | 18    | 0.051982556 |
| 207   | GO:0000272       | polysaccharide catal    | 0.49 | 1   | 0.07788162 | 18    | 0.051982556 |
| 2737  | GO:0003887 GO:00 | DNA-directed DNA p      | 0.49 | 1   | 0.07788162 | 18    | 0.051982556 |
| 9858  | GO:0016817       | hydrolase activity, ac  | 0.49 | 36  | 2.8037384  | 959   | 2.769515    |
| 8681  | GO:0015299       | solute:hydrogen anti    | 0.49 | 4   | 0.31152648 | 98    | 0.28301615  |
| 4236  | GO:0005996       | monosaccharide me       | 0.50 | 5   | 0.3894081  | 125   | 0.36099     |
| 9893  | GO:0016857       | racemase and epime      | 0.50 | 2   | 0.15576324 | 45    | 0.1299564   |
| 11780 | GO:0019829       | cation-transporting A   | 0.50 | 2   | 0.15576324 | 45    | 0.1299564   |
| 9764  | GO:0016701       | oxidoreductase activ    | 0.50 | 3   | 0.23364486 | 72    | 0.20793022  |
| 3799  | GO:0005338 GO:00 | nucleotide-sugar tra    | 0.51 | 1   | 0.07788162 | 19    | 0.054870475 |
| 5230  | GO:0007205       | activation of protein   | 0.51 | 1   | 0.07788162 | 19    | 0.054870475 |
| 6435  | GO:0009066       | aspartate family ami    | 0.51 | 1   | 0.07788162 | 19    | 0.054870475 |
| 9049  | GO:0015780       | nucleotide-sugar tra    | 0.51 | 1   | 0.07788162 | 19    | 0.054870475 |
| 9490  | GO:0016307       | phosphatidylinositol    | 0.51 | 1   | 0.07788162 | 19    | 0.054870475 |
| 9491  | GO:0016308 GO:00 | 1-phosphatidylinosit    | 0.51 | 1   | 0.07788162 | 19    | 0.054870475 |
| 14556 | GO:0032147       | activation of protein   | 0.51 | 1   | 0.07788162 | 19    | 0.054870475 |
| 18750 | GO:0042401       | cellular biogenic ami   | 0.51 | 1   | 0.07788162 | 19    | 0.054870475 |
| 2636  | GO:0003690       | double-stranded DN      | 0.51 | 2   | 0.15576324 | 46    | 0.13284431  |
| 11311 | GO:0019318       | hexose metabolic pr     | 0.52 | 4   | 0.31152648 | 101   | 0.2916799   |
| 9817  | GO:0016763       | transferase activity, t | 0.52 | 3   | 0.23364486 | 74    | 0.21370606  |
| 4916  | GO:0006818       | hydrogen transport      | 0.52 | 11  | 0.8566978  | 292   | 0.84327257  |
| 9246  | GO:0015992       | proton transport        | 0.52 | 11  | 0.8566978  | 292   | 0.84327257  |
| 12608 | GO:0030001       | metal ion transport     | 0.52 | 14  | 1.0903426  | 374   | 1.080082    |
| 6442  | GO:0009073 GO:00 | aromatic amino acid     | 0.52 | 2   | 0.15576324 | 47    | 0.13573223  |
| 8497  | GO:0015079 GO:00 | potassium ion trans     | 0.52 | 2   | 0.15576324 | 47    | 0.13573223  |
| 21943 | GO:0046417       | chorismate metaboli     | 0.52 | 2   | 0.15576324 | 47    | 0.13573223  |
| 25510 | GO:0051213       | dioxygenase activity    | 0.53 | 3   | 0.23364486 | 75    | 0.21659398  |
| 3747  | GO:0005247       | voltage-gated chloric   | 0.53 | 1   | 0.07788162 | 20    | 0.0577584   |
| 3754  | GO:0005254       | chloride channel acti   | 0.53 | 1   | 0.07788162 | 20    | 0.0577584   |
| 6201  | GO:0008794       | arsenate reductase (    | 0.53 | 1   | 0.07788162 | 20    | 0.0577584   |
| 9707  | GO:0016624       | oxidoreductase activ    | 0.53 | 1   | 0.07788162 | 20    | 0.0577584   |
| 9799  | GO:0016744 GO:00 | transferase activity, t | 0.53 | 1   | 0.07788162 | 20    | 0.0577584   |
| 13086 | GO:0030611       | arsenate reductase a    | 0.53 | 1   | 0.07788162 | 20    | 0.0577584   |
| 13088 | GO:0030613       | oxidoreductase activ    | 0.53 | 1   | 0.07788162 | 20    | 0.0577584   |
| 13089 | GO:0030614       | oxidoreductase activ    | 0.53 | 1   | 0.07788162 | 20    | 0.0577584   |
| 15575 | GO:0033176       | proton-transporting V   | 0.53 | 1   | 0.07788162 | 20    | 0.0577584   |
| 16445 | GO:0034061       | DNA polymerase act      | 0.53 | 1   | 0.07788162 | 20    | 0.0577584   |
| 22376 | GO:0046873       | metal ion transmemt     | 0.54 | 8   | 0.62305295 | 213   | 0.6151269   |
| 3844  | GO:0005451       | monovalent cation:hy    | 0.55 | 2   | 0.15576324 | 49    | 0.14150807  |
| 6483  | GO:0009116       | nucleoside metabolic    | 0.55 | 2   | 0.15576324 | 49    | 0.14150807  |
| 8909  | GO:0015630       | microtubule cytoskel    | 0.55 | 2   | 0.15576324 | 49    | 0.14150807  |
| 31421 | GO:0080044       | quercetin 7-O-glucos    | 0.55 | 2   | 0.15576324 | 49    | 0.14150807  |
| 3364  | GO:0004745       | retinol dehydrogenas    | 0.55 | 1   | 0.07788162 | 21    | 0.060646318 |
| 3474  | GO:0004869 GO:00 | cysteine-type endop     | 0.55 | 1   | 0.07788162 | 21    | 0.060646318 |
| 4420  | GO:0006213       | pyrimidine nucleosid    | 0.55 | 1   | 0.07788162 | 21    | 0.060646318 |
| 5878  | GO:0008378       | galactosyltransferas    | 0.55 | 1   | 0.07788162 | 21    | 0.060646318 |
| 6582  | GO:0009218       | pyrimidine ribonucle    | 0.55 | 1   | 0.07788162 | 21    | 0.060646318 |
| 6584  | GO:0009220       | pyrimidine ribonucle    | 0.55 | 1   | 0.07788162 | 21    | 0.060646318 |
| 9698  | GO:0016615       | malate dehydrogena      | 0.55 | 1   | 0.07788162 | 21    | 0.060646318 |
| 21697 | GO:0046131       | pyrimidine ribonucle    | 0.55 | 1   | 0.07788162 | 21    | 0.060646318 |
| 2668  | GO:0003779       | actin binding           | 0.55 | 4   | 0.31152648 | 105   | 0.3032316   |
| 3449  | GO:0004842 GO:00 | ubiquitin-protein liga  | 0.55 | 12  | 0.93457943 | 326   | 0.94146186  |
| 19914 | GO:0043648       | dicarboxylic acid me    | 0.56 | 2   | 0.15576324 | 50    | 0.14439599  |
| 3828  | GO:0005375 GO:00 | copper ion transmem     | 0.56 | 1   | 0.07788162 | 22    | 0.06353424  |
| 3831  | GO:0005385       | zinc ion transmembr     | 0.56 | 1   | 0.07788162 | 22    | 0.06353424  |
| 4920  | GO:0006825       | copper ion transport    | 0.56 | 1   | 0.07788162 | 22    | 0.06353424  |
| 4924  | GO:0006829       | zinc ion transport      | 0.56 | 1   | 0.07788162 | 22    | 0.06353424  |
| 6521  | GO:0009156       | ribonucleoside mon      | 0.56 | 1   | 0.07788162 | 22    | 0.06353424  |

|       |            |                                                         |                                               |      |            |            |             |             |
|-------|------------|---------------------------------------------------------|-----------------------------------------------|------|------------|------------|-------------|-------------|
| 6525  | GO:0009161 | ribonucleoside monophosphate                            | 0.56                                          | 1    | 0.07788162 | 22         | 0.06353424  |             |
| 9545  | GO:0016417 | S-acyltransferase activity                              | 0.56                                          | 1    | 0.07788162 | 22         | 0.06353424  |             |
| 17800 | GO:0035434 | copper ion transmembrane transport                      | 0.56                                          | 1    | 0.07788162 | 22         | 0.06353424  |             |
| 21152 | GO:0045551 | cinnamyl-alcohol dehydrogenase activity                 | 0.56                                          | 1    | 0.07788162 | 22         | 0.06353424  |             |
| 29941 | GO:0071577 | zinc ion transmembrane transport                        | 0.56                                          | 1    | 0.07788162 | 22         | 0.06353424  |             |
| 2691  | GO:0003841 | GO:0003841                                              | 1-acylglycerol-3-phosphate                    | 0.56 | 1          | 0.07788162 | 22          | 0.06353424  |
| 5764  | GO:0008234 | GO:0008234                                              | cysteine-type peptidase activity              | 0.56 | 6          | 0.46728972 | 163         | 0.47073093  |
| 3099  | GO:0004428 | inositol or phosphate                                   | 0.57                                          | 2    | 0.15576324 | 51         | 0.14728391  |             |
| 8908  | GO:0015629 | actin cytoskeleton                                      | 0.57                                          | 2    | 0.15576324 | 51         | 0.14728391  |             |
| 9654  | GO:0016567 | protein ubiquitination                                  | 0.58                                          | 12   | 0.93457943 | 332        | 0.9587894   |             |
| 14854 | GO:0032446 | protein modification                                    | 0.58                                          | 12   | 0.93457943 | 332        | 0.9587894   |             |
| 29011 | GO:0070647 | protein modification                                    | 0.58                                          | 12   | 0.93457943 | 332        | 0.9587894   |             |
| 11833 | GO:0019904 | protein domain specification                            | 0.58                                          | 4    | 0.31152648 | 109        | 0.31478328  |             |
| 4918  | GO:0006821 | chloride transport                                      | 0.58                                          | 1    | 0.07788162 | 23         | 0.06642216  |             |
| 9420  | GO:0016207 | 4-coumarate-CoA ligase activity                         | 0.58                                          | 1    | 0.07788162 | 23         | 0.06642216  |             |
| 9806  | GO:0016752 | sinapoyltransferase activity                            | 0.58                                          | 1    | 0.07788162 | 23         | 0.06642216  |             |
| 9807  | GO:0016753 | O-sinapoyltransferase activity                          | 0.58                                          | 1    | 0.07788162 | 23         | 0.06642216  |             |
| 9808  | GO:0016754 | sinapoylglucose-malate lyase activity                   | 0.58                                          | 1    | 0.07788162 | 23         | 0.06642216  |             |
| 16063 | GO:0033674 | positive regulation of gene expression                  | 0.58                                          | 1    | 0.07788162 | 23         | 0.06642216  |             |
| 19815 | GO:0043549 | regulation of kinase activity                           | 0.58                                          | 1    | 0.07788162 | 23         | 0.06642216  |             |
| 21437 | GO:0045859 | regulation of protein activity                          | 0.58                                          | 1    | 0.07788162 | 23         | 0.06642216  |             |
| 21438 | GO:0045860 | positive regulation of gene expression                  | 0.58                                          | 1    | 0.07788162 | 23         | 0.06642216  |             |
| 25628 | GO:0051338 | regulation of transferase activity                      | 0.58                                          | 1    | 0.07788162 | 23         | 0.06642216  |             |
| 25637 | GO:0051347 | positive regulation of gene expression                  | 0.58                                          | 1    | 0.07788162 | 23         | 0.06642216  |             |
| 2633  | GO:0003684 | damaged DNA binding                                     | 0.58                                          | 1    | 0.07788162 | 23         | 0.06642216  |             |
| 15189 | GO:0032787 | monocarboxylic acid transport                           | 0.58                                          | 3    | 0.23364486 | 81         | 0.23392151  |             |
| 18674 | GO:0042325 | regulation of phosphatase activity                      | 0.58                                          | 3    | 0.23364486 | 81         | 0.23392151  |             |
| 11776 | GO:0019825 | oxygen binding                                          | 0.58                                          | 14   | 1.0903426  | 389        | 1.1234008   |             |
| 9750  | GO:0016679 | oxidoreductase activity                                 | 0.59                                          | 2    | 0.15576324 | 53         | 0.15305975  |             |
| 25635 | GO:0051345 | positive regulation of gene expression                  | 0.59                                          | 2    | 0.15576324 | 53         | 0.15305975  |             |
| 2661  | GO:0003743 | GO:0003743                                              | translation initiation factor activity        | 0.59 | 2          | 0.15576324 | 53          | 0.15305975  |
| 6991  | GO:0009725 | response to hormone                                     | 0.59                                          | 3    | 0.23364486 | 82         | 0.23680943  |             |
| 4526  | GO:0006351 | GO:0006351                                              | transcription, DNA-dependent                  | 0.60 | 57         | 4.4392524  | 1575        | 4.548474    |
| 15176 | GO:0032774 | RNA biosynthetic process                                | 0.60                                          | 57   | 4.4392524  | 1575       | 4.548474    |             |
| 3262  | GO:0004622 | GO:0004622                                              | lysophospholipase activity                    | 0.60 | 1          | 0.07788162 | 24          | 0.06931008  |
| 4692  | GO:0006563 | L-serine metabolic process                              | 0.60                                          | 1    | 0.07788162 | 24         | 0.06931008  |             |
| 7144  | GO:0009892 | negative regulation of gene expression                  | 0.60                                          | 1    | 0.07788162 | 24         | 0.06931008  |             |
| 12694 | GO:0030119 | AP-type membrane channel activity                       | 0.60                                          | 1    | 0.07788162 | 24         | 0.06931008  |             |
| 12706 | GO:0030131 | clathrin adaptor complex activity                       | 0.60                                          | 1    | 0.07788162 | 24         | 0.06931008  |             |
| 13754 | GO:0031324 | negative regulation of gene expression                  | 0.60                                          | 1    | 0.07788162 | 24         | 0.06931008  |             |
| 15390 | GO:0032989 | cellular component morphogenesis                        | 0.60                                          | 1    | 0.07788162 | 24         | 0.06931008  |             |
| 551   | GO:0000902 | GO:0000902                                              | cell morphogenesis                            | 0.60 | 1          | 0.07788162 | 24          | 0.06931008  |
| 11747 | GO:0019787 | GO:0019787                                              | small conjugating protein activity            | 0.61 | 12         | 0.93457943 | 339         | 0.9790048   |
| 4503  | GO:0006310 | DNA recombination                                       | 0.61                                          | 1    | 0.07788162 | 25         | 0.072197996 |             |
| 9482  | GO:0016291 | GO:0016291                                              | acyl-CoA thioesterase activity                | 0.61 | 1          | 0.07788162 | 25          | 0.072197996 |
| 13822 | GO:0031399 | regulation of protein activity                          | 0.61                                          | 1    | 0.07788162 | 25         | 0.072197996 |             |
| 21145 | GO:0045543 | gibberellin 2-beta-D-glucopyranosyltransferase activity | 0.61                                          | 1    | 0.07788162 | 25         | 0.072197996 |             |
| 22357 | GO:0046854 | GO:0046854                                              | phosphatidylinositol 3-kinase activity        | 0.61 | 1          | 0.07788162 | 25          | 0.072197996 |
| 22459 | GO:0046961 | proton-transporting ATPase activity                     | 0.61                                          | 1    | 0.07788162 | 25         | 0.072197996 |             |
| 31393 | GO:0080016 | (-)-E-beta-caryophyllene synthase activity              | 0.61                                          | 1    | 0.07788162 | 25         | 0.072197996 |             |
| 31394 | GO:0080017 | alpha-humulene synthase activity                        | 0.61                                          | 1    | 0.07788162 | 25         | 0.072197996 |             |
| 125   | GO:0000159 | protein phosphatase activity                            | 0.61                                          | 1    | 0.07788162 | 25         | 0.072197996 |             |
| 1225  | GO:0001932 | regulation of protein activity                          | 0.61                                          | 1    | 0.07788162 | 25         | 0.072197996 |             |
| 11222 | GO:0019220 | regulation of phosphatase activity                      | 0.61                                          | 3    | 0.23364486 | 85         | 0.24547319  |             |
| 25471 | GO:0051174 | regulation of phosphatase activity                      | 0.61                                          | 3    | 0.23364486 | 85         | 0.24547319  |             |
| 5840  | GO:0008324 | cation transmembrane transport                          | 0.62                                          | 19   | 1.4797508  | 538        | 1.5537009   |             |
| 6985  | GO:0009719 | response to endogenous stimulus                         | 0.62                                          | 3    | 0.23364486 | 86         | 0.24836111  |             |
| 3896  | GO:0005544 | calcium-dependent protein phosphatase activity          | 0.63                                          | 1    | 0.07788162 | 26         | 0.075085916 |             |
| 4030  | GO:0005741 | mitochondrial outer membrane protein import             | 0.63                                          | 1    | 0.07788162 | 26         | 0.075085916 |             |
| 5978  | GO:0008506 | sucrose:hydrogen symporter activity                     | 0.63                                          | 1    | 0.07788162 | 26         | 0.075085916 |             |
| 5987  | GO:0008515 | GO:0008515                                              | sucrose transmembrane transport               | 0.63 | 1          | 0.07788162 | 26          | 0.075085916 |
| 8567  | GO:0015154 | disaccharide transmembrane transport                    | 0.63                                          | 1    | 0.07788162 | 26         | 0.075085916 |             |
| 9035  | GO:0015766 | disaccharide transport                                  | 0.63                                          | 1    | 0.07788162 | 26         | 0.075085916 |             |
| 9039  | GO:0015770 | sucrose transport                                       | 0.63                                          | 1    | 0.07788162 | 26         | 0.075085916 |             |
| 9421  | GO:0016208 | AMP binding                                             | 0.63                                          | 1    | 0.07788162 | 26         | 0.075085916 |             |
| 9539  | GO:0016411 | acylglycerol O-acyltransferase activity                 | 0.63                                          | 1    | 0.07788162 | 26         | 0.075085916 |             |
| 9744  | GO:0016671 | oxidoreductase activity                                 | 0.63                                          | 1    | 0.07788162 | 26         | 0.075085916 |             |
| 9884  | GO:0016847 | GO:0016847                                              | 1-aminocyclopropanecarboxylate lyase activity | 0.63 | 1          | 0.07788162 | 26          | 0.075085916 |
| 9897  | GO:0016862 | intramolecular oxidoreductase activity                  | 0.63                                          | 1    | 0.07788162 | 26         | 0.075085916 |             |
| 9899  | GO:0016864 | intramolecular oxidoreductase activity                  | 0.63                                          | 1    | 0.07788162 | 26         | 0.075085916 |             |
| 10911 | GO:0018871 | 1-aminocyclopropanecarboxylate lyase activity           | 0.63                                          | 1    | 0.07788162 | 26         | 0.075085916 |             |
| 18579 | GO:0042218 | 1-aminocyclopropanecarboxylate lyase activity           | 0.63                                          | 1    | 0.07788162 | 26         | 0.075085916 |             |
| 30689 | GO:0072330 | monocarboxylic acid transport                           | 0.63                                          | 1    | 0.07788162 | 26         | 0.075085916 |             |
| 2665  | GO:0003756 | protein disulfide isomerase activity                    | 0.63                                          | 1    | 0.07788162 | 26         | 0.075085916 |             |
| 5715  | GO:0008171 | O-methyltransferase activity                            | 0.63                                          | 2    | 0.15576324 | 57         | 0.16461143  |             |
| 6441  | GO:0009072 | aromatic amino acid decarboxylase activity              | 0.63                                          | 2    | 0.15576324 | 57         | 0.16461143  |             |
| 9768  | GO:0016706 | oxidoreductase activity                                 | 0.63                                          | 6    | 0.46728972 | 175        | 0.505386    |             |
| 9796  | GO:0016741 | transferase activity                                    | 0.63                                          | 9    | 0.7009346  | 261        | 0.7537471   |             |
| 4913  | GO:0006814 | GO:0006814                                              | sodium ion transport                          | 0.64 | 2          | 0.15576324 | 58          | 0.16749935  |
| 8499  | GO:0015081 | GO:0015081                                              | sodium ion transmembrane transport            | 0.64 | 2          | 0.15576324 | 58          | 0.16749935  |
| 11820 | GO:0019887 | protein kinase regulation                               | 0.64                                          | 2    | 0.15576324 | 58         | 0.16749935  |             |
| 18086 | GO:0035725 | sodium ion transmembrane transport                      | 0.64                                          | 2    | 0.15576324 | 58         | 0.16749935  |             |
| 29800 | GO:0071436 | sodium ion export                                       | 0.64                                          | 2    | 0.15576324 | 58         | 0.16749935  |             |
| 3329  | GO:0004708 | MAP kinase kinase activity                              | 0.64                                          | 1    | 0.07788162 | 27         | 0.077973835 |             |
| 3631  | GO:0005089 | Rho guanyl-nucleotide exchange factor activity          | 0.64                                          | 1    | 0.07788162 | 27         | 0.077973835 |             |
| 6433  | GO:0009064 | glutamine family amino acid transport                   | 0.64                                          | 1    | 0.07788162 | 27         | 0.077973835 |             |
| 22340 | GO:0046834 | lipid phosphorylation                                   | 0.64                                          | 1    | 0.07788162 | 27         | 0.077973835 |             |
| 25481 | GO:0051184 | cofactor transporter activity                           | 0.64                                          | 1    | 0.07788162 | 27         | 0.077973835 |             |
| 1029  | GO:0001727 | lipid kinase activity                                   | 0.64                                          | 1    | 0.07788162 | 27         | 0.077973835 |             |
| 9719  | GO:0016638 | oxidoreductase activity                                 | 0.65                                          | 3    | 0.23364486 | 89         | 0.25702485  |             |
| 19126 | GO:0042803 | protein homodimerization                                | 0.65                                          | 9    | 0.7009346  | 265        | 0.7652988   |             |



|       |                  |                            |      |     |            |      |             |
|-------|------------------|----------------------------|------|-----|------------|------|-------------|
| 2833  | GO:0004024       | alcohol dehydrogenase      | 0.65 | 1   | 0.07788162 | 28   | 0.080861755 |
| 3284  | GO:0004650       | polygalacturonase activity | 0.65 | 1   | 0.07788162 | 28   | 0.080861755 |
| 6079  | GO:0008654       | phospholipid biosynthesis  | 0.65 | 1   | 0.07788162 | 28   | 0.080861755 |
| 6438  | GO:0009069       | serine family amino acid   | 0.65 | 1   | 0.07788162 | 28   | 0.080861755 |
| 6940  | GO:0009672       | auxin:hydrogen symport     | 0.65 | 1   | 0.07788162 | 28   | 0.080861755 |
| 9238  | GO:0015980       | energy derivation by       | 0.65 | 1   | 0.07788162 | 28   | 0.080861755 |
| 9827  | GO:0016776       | phosphotransferase         | 0.65 | 1   | 0.07788162 | 28   | 0.080861755 |
| 13144 | GO:0030674       | protein binding, bridge    | 0.65 | 1   | 0.07788162 | 28   | 0.080861755 |
| 23911 | GO:0048519 GO:00 | negative regulation of     | 0.65 | 1   | 0.07788162 | 28   | 0.080861755 |
| 23915 | GO:0048523 GO:00 | negative regulation of     | 0.65 | 1   | 0.07788162 | 28   | 0.080861755 |
| 27064 | GO:0060090       | binding, bridging          | 0.65 | 1   | 0.07788162 | 28   | 0.080861755 |
| 20487 | GO:0044237       | cellular metabolic pro     | 0.65 | 298 | 23.208723  | 8185 | 23.637625   |
| 20510 | GO:0044260 GO:00 | cellular macromolec        | 0.66 | 202 | 15.732087  | 5577 | 16.105928   |
| 2980  | GO:0004185       | serine-type carboxyp       | 0.66 | 2   | 0.15576324 | 60   | 0.17327519  |
| 28375 | GO:0070008       | serine-type exopepti       | 0.66 | 2   | 0.15576324 | 60   | 0.17327519  |
| 3644  | GO:0005102       | receptor binding           | 0.66 | 3   | 0.23364486 | 91   | 0.2628007   |
| 4849  | GO:0006730 GO:00 | one-carbon metaboli        | 0.66 | 11  | 0.8566978  | 325  | 0.93857396  |
| 7558  | GO:0010334       | sesquiterpene synth        | 0.67 | 1   | 0.07788162 | 29   | 0.083749674 |
| 9409  | GO:0016192 GO:00 | vesicle-mediated tra       | 0.67 | 1   | 0.07788162 | 29   | 0.083749674 |
| 16785 | GO:0034404       | nucleobase, nucleos        | 0.67 | 3   | 0.23364486 | 92   | 0.26568863  |
| 17033 | GO:0034654       | nucleobase, nucleos        | 0.67 | 3   | 0.23364486 | 92   | 0.26568863  |
| 2978  | GO:0004180       | carboxypeptidase ac        | 0.67 | 2   | 0.15576324 | 62   | 0.17905103  |
| 5213  | GO:0007186       | G-protein coupled re       | 0.67 | 2   | 0.15576324 | 62   | 0.17905103  |
| 11210 | GO:0019207       | kinase regulator acti      | 0.67 | 2   | 0.15576324 | 62   | 0.17905103  |
| 3310  | GO:0004679       | AMP-activated prote        | 0.68 | 1   | 0.07788162 | 30   | 0.086637594 |
| 3518  | GO:0004930 GO:00 | G-protein coupled re       | 0.68 | 1   | 0.07788162 | 30   | 0.086637594 |
| 3975  | GO:0005667       | transcription factor c     | 0.68 | 1   | 0.07788162 | 30   | 0.086637594 |
| 5916  | GO:0008422 GO:00 | beta-glucosidase ac        | 0.68 | 1   | 0.07788162 | 30   | 0.086637594 |
| 6488  | GO:0009123       | nucleoside monophc         | 0.68 | 1   | 0.07788162 | 30   | 0.086637594 |
| 6489  | GO:0009124       | nucleoside monophc         | 0.68 | 1   | 0.07788162 | 30   | 0.086637594 |
| 24247 | GO:0048869       | cellular developmen        | 0.68 | 1   | 0.07788162 | 30   | 0.086637594 |
| 2774  | GO:0003950       | NAD+ ADP-ribosyltr         | 0.68 | 1   | 0.07788162 | 30   | 0.086637594 |
| 8495  | GO:0015077       | monovalent inorgan         | 0.68 | 7   | 0.5451713  | 214  | 0.6180149   |
| 9818  | GO:0016765 GO:00 | transferase activity, t    | 0.69 | 6   | 0.46728972 | 185  | 0.53426516  |
| 5712  | GO:0008168 GO:00 | methyltransferase ac       | 0.69 | 8   | 0.62305295 | 244  | 0.7046524   |
| 7222  | GO:0009975       | cyclase activity           | 0.69 | 1   | 0.07788162 | 31   | 0.08952551  |
| 25478 | GO:0051181       | cofactor transport         | 0.69 | 1   | 0.07788162 | 31   | 0.08952551  |
| 9114  | GO:0015849       | organic acid transpo       | 0.69 | 5   | 0.3894081  | 156  | 0.45051548  |
| 22443 | GO:0046942       | carboxylic acid trans      | 0.69 | 5   | 0.3894081  | 156  | 0.45051548  |
| 4121  | GO:0005856       | cytoskeleton               | 0.69 | 4   | 0.31152648 | 126  | 0.3638779   |
| 12741 | GO:0030170       | pyridoxal phosphate        | 0.69 | 4   | 0.31152648 | 126  | 0.3638779   |
| 28643 | GO:0070279       | vitamin B6 binding         | 0.69 | 4   | 0.31152648 | 126  | 0.3638779   |
| 22416 | GO:0046915       | transition metal ion t     | 0.69 | 2   | 0.15576324 | 64   | 0.18482687  |
| 9913  | GO:0016881       | acid-amino acid liga       | 0.69 | 13  | 1.0124611  | 391  | 1.1291766   |
| 9583  | GO:0016469       | proton-transporting t      | 0.70 | 4   | 0.31152648 | 127  | 0.36676583  |
| 3861  | GO:0005484 GO:00 | SNAP receptor activ        | 0.70 | 2   | 0.15576324 | 65   | 0.18771479  |
| 9838  | GO:0016790       | thiolester hydrolase       | 0.70 | 2   | 0.15576324 | 65   | 0.18771479  |
| 25314 | GO:00051015      | actin filament bindin      | 0.70 | 2   | 0.15576324 | 65   | 0.18771479  |
| 4757  | GO:0006633 GO:00 | fatty acid biosynthe       | 0.70 | 1   | 0.07788162 | 32   | 0.09241343  |
| 6942  | GO:0009674       | potassium:sodium sy        | 0.70 | 1   | 0.07788162 | 32   | 0.09241343  |
| 9041  | GO:0015772       | oligosaccharide tran       | 0.70 | 1   | 0.07788162 | 32   | 0.09241343  |
| 12522 | GO:0022820       | potassium ion sympt        | 0.70 | 1   | 0.07788162 | 32   | 0.09241343  |
| 12833 | GO:0030275       | LRR domain binding         | 0.70 | 1   | 0.07788162 | 32   | 0.09241343  |
| 14381 | GO:0031968       | organelle outer mem        | 0.70 | 1   | 0.07788162 | 32   | 0.09241343  |
| 21041 | GO:0045431       | flavonol synthase ac       | 0.70 | 1   | 0.07788162 | 32   | 0.09241343  |
| 25836 | GO:0051552       | flavone metabolic pr       | 0.70 | 1   | 0.07788162 | 32   | 0.09241343  |
| 25837 | GO:0051553       | flavone biosynthetic       | 0.70 | 1   | 0.07788162 | 32   | 0.09241343  |
| 25838 | GO:0051554       | flavonol metabolic p       | 0.70 | 1   | 0.07788162 | 32   | 0.09241343  |
| 25839 | GO:0051555       | flavonol biosynthetic      | 0.70 | 1   | 0.07788162 | 32   | 0.09241343  |
| 10058 | GO:0017111       | nucleoside-triphosph       | 0.70 | 30  | 2.3364487  | 878  | 2.5355935   |
| 3180  | GO:0004521       | endoribonuclease ac        | 0.71 | 2   | 0.15576324 | 66   | 0.1906027   |
| 9765  | GO:0016702       | oxidoreductase activ       | 0.71 | 2   | 0.15576324 | 66   | 0.1906027   |
| 9890  | GO:0016854       | racemase and epime         | 0.71 | 2   | 0.15576324 | 66   | 0.1906027   |
| 9906  | GO:0016874       | ligase activity            | 0.71 | 20  | 1.5576324  | 597  | 1.7240882   |
| 10103 | GO:0017171       | serine hydrolase act       | 0.71 | 7   | 0.5451713  | 220  | 0.63534236  |
| 8496  | GO:0015078       | hydrogen ion transm        | 0.71 | 5   | 0.3894081  | 160  | 0.4620672   |
| 4493  | GO:0006298 GO:00 | mismatch repair            | 0.71 | 1   | 0.07788162 | 33   | 0.09530135  |
| 30878 | GO:0072522       | purine-containing co       | 0.71 | 1   | 0.07788162 | 33   | 0.09530135  |
| 2632  | GO:0003682       | chromatin binding          | 0.71 | 1   | 0.07788162 | 33   | 0.09530135  |
| 4320  | GO:0006082       | organic acid metabo        | 0.72 | 12  | 0.93457943 | 369  | 1.0656425   |
| 11716 | GO:0019752       | carboxylic acid meta       | 0.72 | 12  | 0.93457943 | 369  | 1.0656425   |
| 19707 | GO:0043436       | oxoacid metabolic pr       | 0.72 | 12  | 0.93457943 | 369  | 1.0656425   |
| 7271  | GO:0010033       | response to organic        | 0.72 | 3   | 0.23364486 | 100  | 0.28879198  |
| 18955 | GO:0042625       | ATPase activity, cou       | 0.72 | 2   | 0.15576324 | 68   | 0.19637854  |
| 32    | GO:0000041       | transition metal ion t     | 0.72 | 2   | 0.15576324 | 68   | 0.19637854  |
| 6004  | GO:0008536       | Ran GTPase binding         | 0.72 | 1   | 0.07788162 | 34   | 0.09818927  |
| 11208 | GO:0019205       | nucleobase, nucleos        | 0.72 | 1   | 0.07788162 | 34   | 0.09818927  |
| 11831 | GO:0019902       | phosphatase binding        | 0.72 | 1   | 0.07788162 | 34   | 0.09818927  |
| 11832 | GO:0019903       | protein phosphatase        | 0.72 | 1   | 0.07788162 | 34   | 0.09818927  |
| 4394  | GO:0006184       | GTP catabolic proces       | 0.73 | 4   | 0.31152648 | 132  | 0.3812054   |
| 21605 | GO:0046039       | GTP metabolic proce        | 0.73 | 4   | 0.31152648 | 132  | 0.3812054   |
| 2758  | GO:0003924       | GTPase activity            | 0.73 | 4   | 0.31152648 | 132  | 0.3812054   |
| 19473 | GO:0043170 GO:00 | macromolecule meta         | 0.73 | 235 | 18.302181  | 6553 | 18.92454    |
| 4911  | GO:0006812 GO:00 | cation transport           | 0.73 | 22  | 1.7133956  | 662  | 1.9118029   |
| 9480  | GO:0016289       | CoA hydrolase activ        | 0.73 | 1   | 0.07788162 | 35   | 0.10107719  |
| 12817 | GO:0030258       | lipid modification         | 0.73 | 1   | 0.07788162 | 35   | 0.10107719  |
| 18541 | GO:0042180       | cellular ketone meta       | 0.74 | 12  | 0.93457943 | 375  | 1.0829699   |
| 3804  | GO:0005345       | purine base transme        | 0.74 | 1   | 0.07788162 | 36   | 0.10396511  |
| 4949  | GO:0006863 GO:00 | purine base transpor       | 0.74 | 1   | 0.07788162 | 36   | 0.10396511  |
| 8739  | GO:0015385 GO:00 | sodium:hydrogen an         | 0.74 | 1   | 0.07788162 | 36   | 0.10396511  |
| 11314 | GO:0019321       | pentose metabolic p        | 0.74 | 1   | 0.07788162 | 36   | 0.10396511  |

|       |                   |                         |      |     |            |      |             |
|-------|-------------------|-------------------------|------|-----|------------|------|-------------|
| 9771  | GO:0016709        | oxidoreductase activ    | 0.75 | 2   | 0.15576324 | 71   | 0.2050423   |
| 19392 | GO:0043085        | positive regulation of  | 0.75 | 3   | 0.23364486 | 104  | 0.30034366  |
| 20343 | GO:0044093        | positive regulation of  | 0.75 | 3   | 0.23364486 | 104  | 0.30034366  |
| 4408  | GO:0006200        | ATP catabolic proce     | 0.75 | 21  | 1.635514   | 641  | 1.8511566   |
| 9918  | GO:0016887 GO:000 | ATPase activity         | 0.75 | 21  | 1.635514   | 641  | 1.8511566   |
| 21600 | GO:0046034        | ATP metabolic proce     | 0.75 | 21  | 1.635514   | 641  | 1.8511566   |
| 2975  | GO:0004175 GO:000 | endopeptidase activi    | 0.75 | 10  | 0.7788162  | 320  | 0.9241344   |
| 8934  | GO:0015662        | ATPase activity, cou    | 0.75 | 1   | 0.07788162 | 37   | 0.10685303  |
| 9915  | GO:0016884 GO:000 | carbon-nitrogen ligas   | 0.75 | 1   | 0.07788162 | 37   | 0.10685303  |
| 6899  | GO:0009628        | response to abiotic s   | 0.76 | 5   | 0.3894081  | 170  | 0.49094638  |
| 9637  | GO:0016538 GO:000 | cyclin-dependent pro    | 0.76 | 1   | 0.07788162 | 38   | 0.10974095  |
| 12834 | GO:0030276        | clathrin binding        | 0.76 | 1   | 0.07788162 | 38   | 0.10974095  |
| 9874  | GO:0016835        | carbon-oxygen lyase     | 0.76 | 6   | 0.46728972 | 202  | 0.5833598   |
| 22375 | GO:0046872        | metal ion binding       | 0.76 | 104 | 8.099689   | 2985 | 8.6204405   |
| 6623  | GO:0009260        | ribonucleotide biosy    | 0.77 | 1   | 0.07788162 | 39   | 0.11262887  |
| 6046  | GO:0008610        | lipid biosynthetic pro  | 0.77 | 4   | 0.31152648 | 141  | 0.4071967   |
| 4573  | GO:0006413 GO:000 | translational initiati  | 0.78 | 2   | 0.15576324 | 76   | 0.2194819   |
| 19470 | GO:0043167        | ion binding             | 0.78 | 104 | 8.099689   | 2997 | 8.655096    |
| 19472 | GO:0043169        | cation binding          | 0.78 | 104 | 8.099689   | 2997 | 8.655096    |
| 11828 | GO:0019899        | enzyme binding          | 0.78 | 7   | 0.5451713  | 237  | 0.684437    |
| 4058  | GO:0005773        | vacuole                 | 0.78 | 1   | 0.07788162 | 40   | 0.1155168   |
| 7072  | GO:0009813        | flavonoid biosynthesi   | 0.78 | 1   | 0.07788162 | 40   | 0.1155168   |
| 8613  | GO:0015205 GO:000 | nucleobase transme      | 0.78 | 1   | 0.07788162 | 40   | 0.1155168   |
| 9116  | GO:0015851        | nucleobase transpor     | 0.78 | 1   | 0.07788162 | 40   | 0.1155168   |
| 11804 | GO:0019867        | outer membrane          | 0.78 | 1   | 0.07788162 | 40   | 0.1155168   |
| 18953 | GO:0042623        | ATPase activity, cou    | 0.78 | 17  | 1.3239875  | 537  | 1.550813    |
| 5604  | GO:0008017        | microtubule binding     | 0.78 | 2   | 0.15576324 | 77   | 0.22236982  |
| 6529  | GO:0009165        | nucleotide biosynthe    | 0.78 | 2   | 0.15576324 | 77   | 0.22236982  |
| 3626  | GO:0005083        | small GTPase regula     | 0.78 | 3   | 0.23364486 | 111  | 0.3205591   |
| 2986  | GO:0004252        | serine-type endopep     | 0.79 | 4   | 0.31152648 | 144  | 0.41586044  |
| 4405  | GO:0006195        | purine nucleotide cat   | 0.79 | 25  | 1.9470406  | 773  | 2.232362    |
| 6508  | GO:0009143        | nucleoside triphosph    | 0.79 | 25  | 1.9470406  | 773  | 2.232362    |
| 6509  | GO:0009144        | purine nucleoside tri   | 0.79 | 25  | 1.9470406  | 773  | 2.232362    |
| 6511  | GO:0009146        | purine nucleoside tri   | 0.79 | 25  | 1.9470406  | 773  | 2.232362    |
| 6519  | GO:0009154        | purine ribonucleotide   | 0.79 | 25  | 1.9470406  | 773  | 2.232362    |
| 6530  | GO:0009166        | nucleotide catabolic    | 0.79 | 25  | 1.9470406  | 773  | 2.232362    |
| 6567  | GO:0009203        | ribonucleoside triphc   | 0.79 | 25  | 1.9470406  | 773  | 2.232362    |
| 6569  | GO:0009205        | purine ribonucleosid    | 0.79 | 25  | 1.9470406  | 773  | 2.232362    |
| 6571  | GO:0009207        | purine ribonucleosid    | 0.79 | 25  | 1.9470406  | 773  | 2.232362    |
| 6624  | GO:0009261        | ribonucleotide catab    | 0.79 | 25  | 1.9470406  | 773  | 2.232362    |
| 17034 | GO:0034655        | nucleobase, nucleos     | 0.79 | 25  | 1.9470406  | 773  | 2.232362    |
| 17035 | GO:0034656        | nucleobase, nucleos     | 0.79 | 25  | 1.9470406  | 773  | 2.232362    |
| 22209 | GO:0046700        | heterocycle catabolic   | 0.79 | 25  | 1.9470406  | 773  | 2.232362    |
| 30879 | GO:0072523        | purine-containing co    | 0.79 | 25  | 1.9470406  | 773  | 2.232362    |
| 12572 | GO:0022890 GO:000 | inorganic cation tran   | 0.79 | 10  | 0.7788162  | 332  | 0.9587894   |
| 5196  | GO:0007166        | cell surface receptor   | 0.79 | 2   | 0.15576324 | 78   | 0.22525774  |
| 19832 | GO:0043566        | structure-specific DN   | 0.79 | 2   | 0.15576324 | 78   | 0.22525774  |
| 20520 | GO:0044270        | cellular nitrogen com   | 0.79 | 25  | 1.9470406  | 777  | 2.2439137   |
| 4756  | GO:0006631        | fatty acid metabolic p  | 0.80 | 1   | 0.07788162 | 42   | 0.121292636 |
| 4874  | GO:0006767        | water-soluble vitamir   | 0.80 | 1   | 0.07788162 | 42   | 0.121292636 |
| 13884 | GO:0031461        | cullin-RING ubiquitin   | 0.80 | 1   | 0.07788162 | 42   | 0.121292636 |
| 18713 | GO:0042364        | water-soluble vitamir   | 0.80 | 1   | 0.07788162 | 42   | 0.121292636 |
| 9911  | GO:0016879        | ligase activity, formir | 0.80 | 14  | 1.0903426  | 456  | 1.3168914   |
| 9875  | GO:0016836        | hydro-lyase activity    | 0.80 | 2   | 0.15576324 | 80   | 0.2310336   |
| 5694  | GO:0008137        | NADH dehydrogenas       | 0.80 | 1   | 0.07788162 | 43   | 0.124180555 |
| 8589  | GO:0015179        | L-amino acid transm     | 0.80 | 1   | 0.07788162 | 43   | 0.124180555 |
| 9076  | GO:0015807        | L-amino acid transpo    | 0.80 | 1   | 0.07788162 | 43   | 0.124180555 |
| 14676 | GO:0032268        | regulation of cellular  | 0.80 | 1   | 0.07788162 | 43   | 0.124180555 |
| 25538 | GO:0051246        | regulation of protein   | 0.80 | 1   | 0.07788162 | 43   | 0.124180555 |
| 6663  | GO:0009309        | amine biosynthetic p    | 0.81 | 5   | 0.3894081  | 181  | 0.5227135   |
| 6622  | GO:0009259 GO:000 | ribonucleotide metal    | 0.81 | 26  | 2.0249221  | 812  | 2.344991    |
| 11426 | GO:0019438        | aromatic compound       | 0.81 | 4   | 0.31152648 | 149  | 0.43030006  |
| 5766  | GO:0008236        | serine-type peptidas    | 0.81 | 6   | 0.46728972 | 214  | 0.6180149   |
| 4873  | GO:0006766        | vitamin metabolic pr    | 0.81 | 1   | 0.07788162 | 44   | 0.12706847  |
| 6477  | GO:0009110        | vitamin biosynthetic    | 0.81 | 1   | 0.07788162 | 44   | 0.12706847  |
| 7071  | GO:0009812        | flavonoid metabolic p   | 0.81 | 1   | 0.07788162 | 44   | 0.12706847  |
| 9186  | GO:0015926        | glucosidase activity    | 0.81 | 1   | 0.07788162 | 44   | 0.12706847  |
| 20522 | GO:0044272        | sulfur compound bio     | 0.81 | 1   | 0.07788162 | 44   | 0.12706847  |
| 20505 | GO:0044255        | cellular lipid metabo   | 0.82 | 5   | 0.3894081  | 184  | 0.53137726  |
| 2628  | GO:0003677        | DNA binding             | 0.82 | 40  | 3.115265   | 1224 | 3.534814    |
| 3630  | GO:0005088        | Ras guanyl-nucleotic    | 0.82 | 1   | 0.07788162 | 45   | 0.1299564   |
| 12693 | GO:0030118 GO:000 | clathrin coat           | 0.82 | 1   | 0.07788162 | 45   | 0.1299564   |
| 24456 | GO:0050136        | NADH dehydrogenas       | 0.82 | 1   | 0.07788162 | 45   | 0.1299564   |
| 3787  | GO:0005319        | lipid transporter activ | 0.82 | 2   | 0.15576324 | 83   | 0.23969735  |
| 6563  | GO:0009199        | ribonucleoside triphc   | 0.82 | 25  | 1.9470406  | 790  | 2.2814567   |
| 5661  | GO:0008092        | cytoskeletal protein i  | 0.82 | 7   | 0.5451713  | 249  | 0.719092    |
| 6515  | GO:0009150        | purine ribonucleotide   | 0.82 | 25  | 1.9470406  | 791  | 2.2843447   |
| 6662  | GO:0009308        | amine metabolic pro     | 0.83 | 9   | 0.7009346  | 314  | 0.9068068   |
| 4144  | GO:0005886 GO:000 | plasma membrane         | 0.83 | 3   | 0.23364486 | 120  | 0.34655038  |
| 5624  | GO:0008047        | enzyme activator act    | 0.83 | 2   | 0.15576324 | 85   | 0.24547319  |
| 6506  | GO:0009141        | nucleoside triphosph    | 0.83 | 25  | 1.9470406  | 796  | 2.2987843   |
| 5807  | GO:0008287        | protein serine/threon   | 0.83 | 1   | 0.07788162 | 47   | 0.13573223  |
| 20533 | GO:0044283        | small molecule biosy    | 0.83 | 10  | 0.7788162  | 347  | 1.0021082   |
| 30877 | GO:0072521        | purine-containing co    | 0.83 | 26  | 2.0249221  | 827  | 2.3883097   |
| 14667 | GO:0032259        | methylation             | 0.83 | 8   | 0.62305295 | 285  | 0.8230572   |
| 5768  | GO:0008238        | exopeptidase activity   | 0.83 | 2   | 0.15576324 | 86   | 0.24836111  |
| 28930 | GO:0070566        | adenyltransferase       | 0.84 | 1   | 0.07788162 | 48   | 0.13862015  |
| 4246  | GO:0006006        | glucose metabolic pi    | 0.84 | 2   | 0.15576324 | 87   | 0.25124902  |
| 4951  | GO:0006865 GO:000 | amino acid transport    | 0.84 | 3   | 0.23364486 | 123  | 0.35521415  |
| 20531 | GO:0044281        | small molecule meta     | 0.84 | 59  | 4.5950155  | 1788 | 5.1636004   |
| 11830 | GO:0019901        | protein kinase bindin   | 0.84 | 1   | 0.07788162 | 49   | 0.14150807  |



|       |                  |                         |      |     |            |      |            |
|-------|------------------|-------------------------|------|-----|------------|------|------------|
| 19831 | GO:0043565       | sequence-specific D     | 0.84 | 4   | 0.31152648 | 159  | 0.45917925 |
| 30306 | GO:0071944       | cell periphery          | 0.85 | 7   | 0.5451713  | 259  | 0.74797124 |
| 4216  | GO:0005976       | polysaccharide meta     | 0.85 | 1   | 0.07788162 | 50   | 0.14439599 |
| 6921  | GO:0009653       | anatomical structure    | 0.85 | 1   | 0.07788162 | 50   | 0.14439599 |
| 9993  | GO:0017016       | Ras GTPase binding      | 0.85 | 1   | 0.07788162 | 50   | 0.14439599 |
| 30886 | GO:0072530       | purine-containing co    | 0.85 | 1   | 0.07788162 | 50   | 0.14439599 |
| 3876  | GO:0005515 GO:00 | protein binding         | 0.85 | 243 | 18.925234  | 6933 | 20.021948  |
| 4373  | GO:0006163       | purine nucleotide me    | 0.85 | 25  | 1.9470406  | 810  | 2.339215   |
| 9285  | GO:0016043       | cellular component c    | 0.85 | 7   | 0.5451713  | 261  | 0.7537471  |
| 9733  | GO:0016655       | oxidoreductase activ    | 0.85 | 1   | 0.07788162 | 51   | 0.14728391 |
| 9975  | GO:0016998       | cell wall macromolec    | 0.85 | 1   | 0.07788162 | 51   | 0.14728391 |
| 22410 | GO:0046907       | intracellular transpor  | 0.85 | 1   | 0.07788162 | 51   | 0.14728391 |
| 25925 | GO:0051641       | cellular localization   | 0.85 | 1   | 0.07788162 | 51   | 0.14728391 |
| 25933 | GO:0051649       | establishment of loca   | 0.85 | 1   | 0.07788162 | 51   | 0.14728391 |
| 13531 | GO:0031072       | heat shock protein bi   | 0.86 | 6   | 0.46728972 | 230  | 0.6642216  |
| 5693  | GO:0008135       | translation factor act  | 0.86 | 2   | 0.15576324 | 92   | 0.26568863 |
| 5097  | GO:0007049       | cell cycle              | 0.86 | 1   | 0.07788162 | 52   | 0.15017183 |
| 6965  | GO:0009699       | phenylpropanoid bio     | 0.86 | 1   | 0.07788162 | 52   | 0.15017183 |
| 20287 | GO:0044036       | cell wall macromolec    | 0.86 | 1   | 0.07788162 | 52   | 0.15017183 |
| 2778  | GO:0003954       | NADH dehydrogenas       | 0.87 | 1   | 0.07788162 | 53   | 0.15305975 |
| 17918 | GO:0035556 GO:00 | intracellular signal tr | 0.87 | 1   | 0.07788162 | 54   | 0.15594767 |
| 30069 | GO:0071705       | nitrogen compound t     | 0.87 | 5   | 0.3894081  | 202  | 0.5833598  |
| 15436 | GO:0033036       | macromolecule loca      | 0.87 | 11  | 0.8566978  | 397  | 1.1465042  |
| 4894  | GO:0006790       | sulfur compound me      | 0.88 | 1   | 0.07788162 | 55   | 0.15883559 |
| 6077  | GO:0008652       | cellular amino acid b   | 0.88 | 4   | 0.31152648 | 169  | 0.48805845 |
| 20356 | GO:0044106       | cellular amine metab    | 0.88 | 8   | 0.62305295 | 303  | 0.8750397  |
| 9883  | GO:0016846       | carbon-sulfur lyase a   | 0.88 | 1   | 0.07788162 | 56   | 0.16172351 |
| 13697 | GO:0031267       | small GTPase bindin     | 0.88 | 1   | 0.07788162 | 56   | 0.16172351 |
| 15576 | GO:0033177       | proton-transporting t   | 0.88 | 1   | 0.07788162 | 56   | 0.16172351 |
| 15577 | GO:0033178       | proton-transporting t   | 0.88 | 1   | 0.07788162 | 56   | 0.16172351 |
| 9308  | GO:0016070       | RNA metabolic proc      | 0.88 | 60  | 4.6728973  | 1855 | 5.3570914  |
| 9103  | GO:0015837       | amine transport         | 0.88 | 3   | 0.23364486 | 135  | 0.38986918 |
| 25379 | GO:0051082       | unfolded protein bind   | 0.88 | 2   | 0.15576324 | 98   | 0.28301615 |
| 3801  | GO:0005342       | organic acid transme    | 0.88 | 3   | 0.23364486 | 136  | 0.3927571  |
| 22444 | GO:0046943       | carboxylic acid trans   | 0.88 | 3   | 0.23364486 | 136  | 0.3927571  |
| 5964  | GO:0008483       | transaminase activit    | 0.88 | 1   | 0.07788162 | 57   | 0.16461143 |
| 9821  | GO:0016769       | transferase activity, t | 0.88 | 1   | 0.07788162 | 57   | 0.16461143 |
| 3333  | GO:0004712       | protein serine/threon   | 0.89 | 1   | 0.07788162 | 59   | 0.17038727 |
| 9900  | GO:0016866       | intramolecular transf   | 0.89 | 1   | 0.07788162 | 59   | 0.17038727 |
| 9295  | GO:0016053       | organic acid biosynt    | 0.90 | 5   | 0.3894081  | 211  | 0.6093511  |
| 21058 | GO:0045454 GO:00 | cell redox homeostat    | 0.90 | 5   | 0.3894081  | 211  | 0.6093511  |
| 21922 | GO:0046394       | carboxylic acid biosy   | 0.90 | 5   | 0.3894081  | 211  | 0.6093511  |
| 6964  | GO:0009698       | phenylpropanoid me      | 0.90 | 1   | 0.07788162 | 60   | 0.17327519 |
| 25319 | GO:0051020       | GTPase binding          | 0.90 | 1   | 0.07788162 | 60   | 0.17327519 |
| 11787 | GO:0019842       | vitamin binding         | 0.90 | 4   | 0.31152648 | 177  | 0.5111618  |
| 4641  | GO:0006508       | proteolysis             | 0.90 | 29  | 2.258567   | 965  | 2.7868426  |
| 13164 | GO:0030695       | GTPase regulator ac     | 0.90 | 3   | 0.23364486 | 142  | 0.4100846  |
| 28365 | GO:0065008       | regulation of biologic  | 0.90 | 8   | 0.62305295 | 316  | 0.9125827  |
| 20639 | GO:0044445       | cytosolic part          | 0.90 | 1   | 0.07788162 | 62   | 0.17905103 |
| 3195  | GO:0004540       | ribonuclease activity   | 0.91 | 2   | 0.15576324 | 106  | 0.3061195  |
| 26932 | GO:0055086       | nucleobase, nucleos     | 0.91 | 28  | 2.1806853  | 944  | 2.7261963  |
| 4867  | GO:0006753       | nucleoside phosphat     | 0.91 | 27  | 2.1028037  | 914  | 2.6395588  |
| 6484  | GO:0009117       | nucleotide metabolic    | 0.91 | 27  | 2.1028037  | 914  | 2.6395588  |
| 20532 | GO:0044282       | small molecule catal    | 0.91 | 25  | 1.9470406  | 854  | 2.4662836  |
| 8910  | GO:0015631       | tubulin binding         | 0.91 | 2   | 0.15576324 | 107  | 0.30900744 |
| 9710  | GO:0016628       | oxidoreductase activ    | 0.91 | 1   | 0.07788162 | 65   | 0.18771479 |
| 4844  | GO:0006725       | cellular aromatic con   | 0.92 | 4   | 0.31152648 | 185  | 0.53426516 |
| 9829  | GO:0016779       | nucleotidyltransfera    | 0.92 | 3   | 0.23364486 | 148  | 0.42741212 |
| 4478  | GO:0006281       | DNA repair              | 0.92 | 3   | 0.23364486 | 149  | 0.43030006 |
| 5037  | GO:0006974 GO:00 | response to DNA da      | 0.92 | 3   | 0.23364486 | 149  | 0.43030006 |
| 4561  | GO:0006399       | tRNA metabolic proc     | 0.92 | 1   | 0.07788162 | 66   | 0.1906027  |
| 5615  | GO:0008033       | tRNA processing         | 0.92 | 1   | 0.07788162 | 66   | 0.1906027  |
| 20498 | GO:0044248       | cellular catabolic pro  | 0.92 | 26  | 2.0249221  | 894  | 2.5818002  |
| 9730  | GO:0016651       | oxidoreductase activ    | 0.92 | 2   | 0.15576324 | 112  | 0.32344702 |
| 27562 | GO:0060589       | nucleoside-triphosp     | 0.92 | 3   | 0.23364486 | 152  | 0.4389638  |
| 4850  | GO:0006732 GO:00 | coenzyme metabolic      | 0.93 | 2   | 0.15576324 | 113  | 0.32633495 |
| 9933  | GO:0016903       | oxidoreductase activ    | 0.93 | 2   | 0.15576324 | 113  | 0.32633495 |
| 9722  | GO:0016641       | oxidoreductase activ    | 0.93 | 1   | 0.07788162 | 69   | 0.19926646 |
| 21710 | GO:0046148       | pigment biosynthetic    | 0.93 | 1   | 0.07788162 | 69   | 0.19926646 |
| 5726  | GO:0008187       | poly-pyrimidine tract   | 0.93 | 1   | 0.07788162 | 70   | 0.20215438 |
| 5788  | GO:0008266       | poly(U) RNA binding     | 0.93 | 1   | 0.07788162 | 70   | 0.20215438 |
| 2649  | GO:0003713       | transcription coactiv   | 0.93 | 1   | 0.07788162 | 70   | 0.20215438 |
| 20521 | GO:0044271       | cellular nitrogen com   | 0.93 | 9   | 0.7009346  | 367  | 1.0598665  |
| 6020  | GO:0008565 GO:00 | protein transporter a   | 0.93 | 2   | 0.15576324 | 115  | 0.3321108  |
| 6475  | GO:0009108       | coenzyme biosynthe      | 0.93 | 1   | 0.07788162 | 72   | 0.20793022 |
| 9740  | GO:0016667       | oxidoreductase activ    | 0.93 | 1   | 0.07788162 | 72   | 0.20793022 |
| 8584  | GO:0015171 GO:00 | amino acid transmer     | 0.94 | 2   | 0.15576324 | 118  | 0.34077454 |
| 2521  | GO:0003333       | amino acid transmer     | 0.94 | 2   | 0.15576324 | 118  | 0.34077454 |
| 9703  | GO:0016620       | oxidoreductase activ    | 0.94 | 1   | 0.07788162 | 73   | 0.21081814 |
| 18786 | GO:0042440       | pigment metabolic p     | 0.94 | 1   | 0.07788162 | 73   | 0.21081814 |
| 19125 | GO:0042802       | identical protein bind  | 0.94 | 19  | 1.4797508  | 697  | 2.01288    |
| 11695 | GO:0019725       | cellular homeostasis    | 0.94 | 5   | 0.3894081  | 234  | 0.67577326 |
| 10244 | GO:0018130       | heterocycle biosynth    | 0.94 | 4   | 0.31152648 | 199  | 0.57469606 |
| 3627  | GO:0005085 GO:00 | guanyl-nucleotide ex    | 0.94 | 1   | 0.07788162 | 75   | 0.21659398 |
| 3965  | GO:0005654       | nucleoplasm             | 0.94 | 1   | 0.07788162 | 75   | 0.21659398 |
| 20645 | GO:0044451       | nucleoplasm part        | 0.94 | 1   | 0.07788162 | 75   | 0.21659398 |
| 18925 | GO:0042592       | homeostatic process     | 0.94 | 5   | 0.3894081  | 238  | 0.68732494 |
| 7691  | GO:0010467       | gene expression         | 0.94 | 61  | 4.7507787  | 1974 | 5.7007537  |
| 4649  | GO:0006520 GO:00 | cellular amino acid n   | 0.95 | 6   | 0.46728972 | 277  | 0.7999538  |
| 2819  | GO:0004004       | ATP-dependent RNA       | 0.95 | 1   | 0.07788162 | 78   | 0.22525774 |
| 4100  | GO:0005829       | cytosol                 | 0.95 | 1   | 0.07788162 | 78   | 0.22525774 |

|       |                  |                        |      |     |            |       |            |
|-------|------------------|------------------------|------|-----|------------|-------|------------|
| 5725  | GO:0008186 GO:00 | RNA-dependent ATF      | 0.95 | 1   | 0.07788162 | 78    | 0.22525774 |
| 3761  | GO:0005275 GO:00 | amine transmembran     | 0.95 | 2   | 0.15576324 | 126   | 0.3638779  |
| 634   | GO:0000988       | protein binding trans  | 0.95 | 2   | 0.15576324 | 126   | 0.3638779  |
| 635   | GO:0000989       | transcription factor b | 0.95 | 2   | 0.15576324 | 126   | 0.3638779  |
| 2648  | GO:0003712       | transcription cofacto  | 0.95 | 2   | 0.15576324 | 126   | 0.3638779  |
| 2654  | GO:0003724       | RNA helicase activit   | 0.95 | 1   | 0.07788162 | 80    | 0.2310336  |
| 22007 | GO:0046483       | heterocycle metaboli   | 0.95 | 31  | 2.4143302  | 1094  | 3.1593843  |
| 2658  | GO:0003729       | mRNA binding           | 0.96 | 1   | 0.07788162 | 82    | 0.23680943 |
| 30205 | GO:0071841       | cellular component c   | 0.96 | 6   | 0.46728972 | 285   | 0.8230572  |
| 15949 | GO:0033554       | cellular response to   | 0.96 | 3   | 0.23364486 | 173   | 0.49961013 |
| 4327  | GO:0006091       | generation of precurs  | 0.96 | 1   | 0.07788162 | 84    | 0.24258527 |
| 4067  | GO:0005783       | endoplasmic reticulu   | 0.96 | 3   | 0.23364486 | 174   | 0.50249803 |
| 30204 | GO:0071840       | cellular component c   | 0.96 | 8   | 0.62305295 | 362   | 1.045427   |
| 24235 | GO:0048856       | anatomical structure   | 0.97 | 1   | 0.07788162 | 90    | 0.2599128  |
| 6428  | GO:0009059 GO:00 | macromolecule bios     | 0.97 | 60  | 4.6728973  | 2003  | 5.7845035  |
| 9294  | GO:0016052 GO:00 | carbohydrate catabo    | 0.97 | 1   | 0.07788162 | 91    | 0.2628007  |
| 13547 | GO:0031090       | organelle membrane     | 0.97 | 4   | 0.31152648 | 224   | 0.64689404 |
| 13041 | GO:0030554       | adenyl nucleotide bir  | 0.97 | 13  | 1.0124611  | 550   | 1.5883559  |
| 14965 | GO:0032559       | adenyl ribonucleotid   | 0.97 | 13  | 1.0124611  | 550   | 1.5883559  |
| 11712 | GO:0019748       | secondary metabolic    | 0.97 | 1   | 0.07788162 | 95    | 0.27435237 |
| 9895  | GO:0016860       | intramolecular oxid    | 0.97 | 2   | 0.15576324 | 146   | 0.42163628 |
| 17024 | GO:0034645 GO:00 | cellular macromolec    | 0.97 | 59  | 4.5950155  | 1999  | 5.7729516  |
| 3884  | GO:0005524       | ATP binding            | 0.97 | 12  | 0.93457943 | 524   | 1.51327    |
| 6425  | GO:0009056       | catabolic process      | 0.98 | 28  | 2.1806853  | 1051  | 3.0352037  |
| 16851 | GO:0034470       | ncRNA processing       | 0.98 | 1   | 0.07788162 | 99    | 0.28590405 |
| 17039 | GO:0034660       | ncRNA metabolic pro    | 0.98 | 1   | 0.07788162 | 99    | 0.28590405 |
| 16430 | GO:0034046       | poly(G) RNA binding    | 0.98 | 1   | 0.07788162 | 100   | 0.28879198 |
| 5763  | GO:0008233       | peptidase activity     | 0.98 | 13  | 1.0124611  | 565   | 1.6316746  |
| 28378 | GO:0070011       | peptidase activity, ac | 0.98 | 12  | 0.93457943 | 537   | 1.550813   |
| 9709  | GO:0016627       | oxidoreductase activ   | 0.98 | 1   | 0.07788162 | 104   | 0.30034366 |
| 3885  | GO:0005525       | GTP binding            | 0.98 | 4   | 0.31152648 | 245   | 0.70754033 |
| 11032 | GO:0019001       | guanyl nucleotide bir  | 0.98 | 4   | 0.31152648 | 245   | 0.70754033 |
| 14967 | GO:0032561       | guanyl ribonucleotid   | 0.98 | 4   | 0.31152648 | 245   | 0.70754033 |
| 6426  | GO:0009057 GO:00 | macromolecule cata     | 0.98 | 1   | 0.07788162 | 106   | 0.3061195  |
| 3942  | GO:0005618       | cell wall              | 0.98 | 1   | 0.07788162 | 107   | 0.30900744 |
| 12868 | GO:0030312       | external encapsulati   | 0.99 | 1   | 0.07788162 | 111   | 0.3205591  |
| 5055  | GO:0006996       | organelle organizati   | 0.99 | 2   | 0.15576324 | 164   | 0.47361887 |
| 25483 | GO:0051186       | cofactor metabolic p   | 0.99 | 2   | 0.15576324 | 164   | 0.47361887 |
| 29081 | GO:0070717       | poly-purine tract binc | 0.99 | 1   | 0.07788162 | 112   | 0.32344702 |
| 14379 | GO:0031966       | mitochondrial memb     | 0.99 | 1   | 0.07788162 | 114   | 0.32922286 |
| 9889  | GO:0016853       | isomerase activity     | 0.99 | 5   | 0.3894081  | 306   | 0.8837035  |
| 5019  | GO:0006952 GO:00 | defense response       | 0.99 | 3   | 0.23364486 | 221   | 0.63823026 |
| 14910 | GO:0032502       | developmental proce    | 0.99 | 1   | 0.07788162 | 121   | 0.3494383  |
| 6884  | GO:0009607       | response to biotic st  | 0.99 | 1   | 0.07788162 | 122   | 0.3523262  |
| 14392 | GO:0031981       | nuclear lumen          | 0.99 | 1   | 0.07788162 | 123   | 0.35521415 |
| 25485 | GO:0051188       | cofactor biosynthetic  | 0.99 | 1   | 0.07788162 | 123   | 0.35521415 |
| 131   | GO:0000166       | nucleotide binding     | 0.99 | 31  | 2.4143302  | 1213  | 3.5030468  |
| 4572  | GO:0006412 GO:00 | translation            | 0.99 | 2   | 0.15576324 | 180   | 0.5198256  |
| 8466  | GO:0015031 GO:00 | protein transport      | 0.99 | 2   | 0.15576324 | 185   | 0.53426516 |
| 20820 | GO:0045184       | establishment of pro   | 0.99 | 2   | 0.15576324 | 185   | 0.53426516 |
| 3863  | GO:0005488       | binding                | 0.99 | 474 | 36.91589   | 13903 | 40.15075   |
| 20499 | GO:0044249       | cellular biosynthetic  | 0.99 | 76  | 5.919003   | 2635  | 7.6096687  |
| 2657  | GO:0003727 GO:00 | single-stranded RNA    | 0.99 | 2   | 0.15576324 | 188   | 0.54292893 |
| 5669  | GO:0008104       | protein localization   | 0.99 | 2   | 0.15576324 | 189   | 0.54581684 |
| 30206 | GO:0071842       | cellular component c   | 0.99 | 2   | 0.15576324 | 193   | 0.5573685  |
| 19532 | GO:0043233       | organelle lumen        | 0.99 | 1   | 0.07788162 | 137   | 0.39564502 |
| 28380 | GO:0070013       | intracellular organell | 0.99 | 1   | 0.07788162 | 137   | 0.39564502 |
| 22415 | GO:0046914       | transition metal ion b | 0.99 | 74  | 5.76324    | 2599  | 7.5057034  |
| 6427  | GO:0009058       | biosynthetic process   | 1.00 | 80  | 6.23053    | 2796  | 8.074624   |
| 5018  | GO:0006950       | response to stress     | 1.00 | 12  | 0.93457943 | 611   | 1.764519   |
| 14959 | GO:0032553       | ribonucleotide bindin  | 1.00 | 17  | 1.3239875  | 795   | 2.2958963  |
| 14961 | GO:0032555       | purine ribonucleotide  | 1.00 | 17  | 1.3239875  | 795   | 2.2958963  |
| 3955  | GO:0005634       | nucleus                | 1.00 | 36  | 2.8037384  | 1433  | 4.138389   |
| 10033 | GO:0017076       | purine nucleotide bir  | 1.00 | 17  | 1.3239875  | 797   | 2.3016722  |
| 18000 | GO:0035639       | purine ribonucleosid   | 1.00 | 16  | 1.2461059  | 769   | 2.2208104  |
| 4029  | GO:0005740       | mitochondrial envelo   | 1.00 | 1   | 0.07788162 | 151   | 0.4360759  |
| 3716  | GO:0005198       | structural molecule a  | 1.00 | 6   | 0.46728972 | 393   | 1.1349525  |
| 31895 | GO:0090304       | nucleic acid metabol   | 1.00 | 64  | 4.9844236  | 2340  | 6.7577324  |
| 14386 | GO:0031974       | membrane-enclosed      | 1.00 | 1   | 0.07788162 | 154   | 0.44473964 |
| 4558  | GO:0006396 GO:00 | RNA processing         | 1.00 | 2   | 0.15576324 | 219   | 0.63245445 |
| 20623 | GO:0044429       | mitochondrial part     | 1.00 | 1   | 0.07788162 | 165   | 0.47650677 |
| 4990  | GO:0006915 GO:00 | apoptosis              | 1.00 | 2   | 0.15576324 | 227   | 0.6555578  |
| 4357  | GO:0006139 GO:00 | nucleobase, nucleos    | 1.00 | 93  | 7.2429905  | 3285  | 9.486816   |
| 4605  | GO:0006457 GO:00 | protein folding        | 1.00 | 1   | 0.07788162 | 173   | 0.49961013 |
| 5756  | GO:0008219       | cell death             | 1.00 | 2   | 0.15576324 | 239   | 0.69021285 |
| 8209  | GO:0012501 GO:00 | programmed cell dea    | 1.00 | 2   | 0.15576324 | 239   | 0.69021285 |
| 9462  | GO:0016265       | death                  | 1.00 | 2   | 0.15576324 | 239   | 0.69021285 |
| 20622 | GO:0044428       | nuclear part           | 1.00 | 1   | 0.07788162 | 178   | 0.5140497  |
| 8211  | GO:0012505       | endomembrane syst      | 1.00 | 2   | 0.15576324 | 242   | 0.6988766  |
| 5610  | GO:0008026       | ATP-dependent helic    | 1.00 | 1   | 0.07788162 | 183   | 0.52848935 |
| 28401 | GO:0070035       | purine NTP-depende     | 1.00 | 1   | 0.07788162 | 183   | 0.52848935 |
| 3068  | GO:0004386       | helicase activity      | 1.00 | 1   | 0.07788162 | 189   | 0.54581684 |
| 3178  | GO:0004519       | endonuclease activit   | 1.00 | 4   | 0.31152648 | 356   | 1.0280994  |
| 14380 | GO:0031967       | organelle envelope     | 1.00 | 1   | 0.07788162 | 201   | 0.5804719  |
| 14387 | GO:0031975       | envelope               | 1.00 | 1   | 0.07788162 | 205   | 0.59202355 |
| 17020 | GO:0034641       | cellular nitrogen com  | 1.00 | 102 | 7.9439254  | 3678  | 10.621769  |
| 2653  | GO:0003723       | RNA binding            | 1.00 | 14  | 1.0903426  | 797   | 2.3016722  |
| 4906  | GO:0006807       | nitrogen compound r    | 1.00 | 103 | 8.021807   | 3725  | 10.757502  |
| 2627  | GO:0003676       | nucleic acid binding   | 1.00 | 62  | 4.8286605  | 2453  | 7.0840673  |
| 4028  | GO:0005739       | mitochondrion          | 1.00 | 1   | 0.07788162 | 219   | 0.63245445 |
| 6796  | GO:0009507       | chloroplast            | 1.00 | 1   | 0.07788162 | 229   | 0.6613336  |



|       |                       |                                              |      |     |            |      |           |
|-------|-----------------------|----------------------------------------------|------|-----|------------|------|-----------|
| 5791  | GO:0008270            | zinc ion binding                             | 1.00 | 43  | 3.3489096  | 1880 | 5.4292893 |
| 6824  | GO:0009536            | plastid                                      | 1.00 | 1   | 0.07788162 | 247  | 0.7133162 |
| 3177  | GO:0004518            | nuclease activity                            | 1.00 | 4   | 0.31152648 | 427  | 1.2331418 |
| 3903  | GO:0005575 GO:0005623 | cellular_component                           | 1.00 | 260 | 20.249222  | 8515 | 24.590637 |
| 15392 | GO:0032991            | macromolecular complex                       | 1.00 | 34  | 2.647975   | 1616 | 4.666878  |
| 20640 | GO:0044446            | intracellular organelle                      | 1.00 | 9   | 0.7009346  | 710  | 2.0504231 |
| 20616 | GO:0044422            | organelle part                               | 1.00 | 9   | 0.7009346  | 712  | 2.0561988 |
| 4459  | GO:0006259 GO:0005623 | DNA metabolic process                        | 1.00 | 4   | 0.31152648 | 493  | 1.4237444 |
| 3946  | GO:0005623            | cell                                         | 1.00 | 242 | 18.847351  | 8227 | 23.758917 |
| 20657 | GO:0044464            | cell part                                    | 1.00 | 242 | 18.847351  | 8227 | 23.758917 |
| 19526 | GO:0043227            | membrane-bounded organelle                   | 1.00 | 44  | 3.4267912  | 2142 | 6.185924  |
| 19530 | GO:0043231            | intracellular membrane-bounded organelle     | 1.00 | 44  | 3.4267912  | 2142 | 6.185924  |
| 3945  | GO:0005622            | intracellular                                | 1.00 | 106 | 8.255452   | 4751 | 13.720507 |
| 4027  | GO:0005737            | cytoplasm                                    | 1.00 | 29  | 2.258567   | 2001 | 5.7787275 |
| 4109  | GO:0005840 GO:0005623 | ribosome                                     | 1.00 | 1   | 0.07788162 | 682  | 1.9695613 |
| 13018 | GO:0030529            | ribonucleoprotein complex                    | 1.00 | 1   | 0.07788162 | 741  | 2.1399486 |
| 19525 | GO:0043226            | organelle                                    | 1.00 | 49  | 3.8161993  | 3013 | 8.701303  |
| 19527 | GO:0043228            | non-membrane-bounded organelle               | 1.00 | 5   | 0.3894081  | 923  | 2.66555   |
| 19528 | GO:0043229            | intracellular organelle                      | 1.00 | 49  | 3.8161993  | 3013 | 8.701303  |
| 19531 | GO:0043232            | intracellular non-membrane-bounded organelle | 1.00 | 5   | 0.3894081  | 923  | 2.66555   |
| 20618 | GO:0044424            | intracellular part                           | 1.00 | 78  | 6.074766   | 3853 | 11.127155 |
| 20638 | GO:0044444            | cytoplasmic part                             | 1.00 | 21  | 1.635514   | 1644 | 4.7477403 |
