# Supplementary material for: The Tomato Hybrid Proline-rich Protein regulates the abscission zone competence to respond to ethylene signals
Source: PubMed Central journal article supplement (PMC5981600; doi:10.1038/s41438-018-0033-2), 2018-06-01
Supplement: 41438_2018_33_MOESM7_ESM.pdf [file 41438_2018_33_MOESM7_ESM.pdf]

Table S7. Differentially regulated genes (up and down regulated) in the control compared with THyPRP silenced plants in FAZ at 20 h along with their expression values, fold changes, annotations, GO ids and terms.

Worksheet 2 & 3

| Set6                 |                  |           |      |                 |       |
|----------------------|------------------|-----------|------|-----------------|-------|
| Line                 | Array            | Details   | Time | Treated vs. Con | Set   |
| Control – New Yorker | 254331010027_1_3 | 20h_11_AZ | 20h  | Control         | Set 6 |
| Control – New Yorker | 254331010027_1_4 | 20h_12_AZ | 20h  |                 |       |
| TAPG + TPRP          | 254331010036_1_3 | 20h_47_AZ | 20h  | Treated         |       |
| TAPG + TPRP          | 254331010036_1_4 | 20h_48_AZ | 20h  |                 |       |

**Note:**

Fold change expression values are provided as logbase 2

**Flagging Criteria:**

Compromised: If the gProcessedSignal value is less than the background intensity

Detected: If the gProcessedSignal value is above background intensity

| Column Header   | Description                                                     |
|-----------------|-----------------------------------------------------------------|
| ProbeName       | Unique probe identifier                                         |
| GeneName        | GeneSymbol                                                      |
| Fold            | Fold change calculated is log base 2                            |
| Flag            | Detected or Compromised                                         |
| GeomeanFold     | Average Fold change for the replicates calculated is log base 2 |
| p-Value         | t-test p- value                                                 |
| gProcessedSigna | Background subtracted signal intensity                          |

Worksheet 4 & 5

This file contains the fold change for all the spots in the array

**GO ID**

Gene Ontology ID

**GO ACCESSION**

Gene Ontology Function name

**p-value :**

The probability of obtaining the specified GO accession number from a list of random entities. Less the p-value more significant is the GO accession number.

**Significant pvalue<0.05**

**Count in Selection :**

This refers to the number of genes in the selected entity (for example, from T-test) list which have that particular GO term.

**%Count in Selection :**

This refers to the percentage of genes in the input entity list which have that GO term.

**Count in Total :**

This refers to the number of genes in All Entities which have that GO term.

**%Count in Total :**

This refers to the percentage of genes in the All Entities list which have that GO term.

Cut off used to filter up and down regulated genes

**Upregulated**

For filtering upregulation we consider flag should be Detected in the treated sample and can be Compromised or Detected in the control sample and fold>=0.8 in the individual replicates and fold>=1 in the Geomean of treated samples.

**Downregulated**

For filtering downregulation we consider flag can be Detected or Compromised in the treated sample and should be Detected in the control sample and fold<=-0.8 in the individual replicates and fold<=-1 in the Geomean of treated samples.

**Differentially Regulated Probes**

| Sample                                   | Up   | Down |
|------------------------------------------|------|------|
| 20h_TPRP_AZ vs. 20h_Control_AZ_Sense     | 1663 | 1160 |
| 20h_TPRP_AZ vs. 20h_Control_AZ_Antisense | 1029 | 807  |

























| GT | Series | Symbol | Company    | Country | Exchange | Market | Open    | High    | Low     | Close   | Volume   | Market Cap  | PE Ratio | Dividend Yield | EPS    | Dividend | Payout Ratio | YTD Return | 1Y Return | 3Y Return | 5Y Return | 10Y Return |         |         |
|----|--------|--------|------------|---------|----------|--------|---------|---------|---------|---------|----------|-------------|----------|----------------|--------|----------|--------------|------------|-----------|-----------|-----------|------------|---------|---------|
| GT | Series | 1234   | Company A  | USA     | NYSE     | Common | 100.00  | 105.00  | 95.00   | 102.00  | 1000000  | 1000000000  | 15.00    | 2.00%          | 6.67   | 1.00     | 15.00%       | 10.00%     | 15.00%    | 15.00%    | 15.00%    | 15.00%     |         |         |
| GT | Series | 1235   | Company B  | USA     | NYSE     | Common | 200.00  | 210.00  | 190.00  | 205.00  | 2000000  | 2000000000  | 20.00    | 1.50%          | 13.33  | 2.00     | 15.00%       | 12.00%     | 18.00%    | 18.00%    | 18.00%    | 18.00%     | 18.00%  |         |
| GT | Series | 1236   | Company C  | USA     | NYSE     | Common | 300.00  | 310.00  | 290.00  | 305.00  | 3000000  | 3000000000  | 25.00    | 1.00%          | 20.00  | 3.00     | 15.00%       | 14.00%     | 21.00%    | 21.00%    | 21.00%    | 21.00%     | 21.00%  | 21.00%  |
| GT | Series | 1237   | Company D  | USA     | NYSE     | Common | 400.00  | 410.00  | 390.00  | 405.00  | 4000000  | 4000000000  | 30.00    | 0.80%          | 26.67  | 4.00     | 15.00%       | 16.00%     | 24.00%    | 24.00%    | 24.00%    | 24.00%     | 24.00%  | 24.00%  |
| GT | Series | 1238   | Company E  | USA     | NYSE     | Common | 500.00  | 510.00  | 490.00  | 505.00  | 5000000  | 5000000000  | 35.00    | 0.60%          | 33.33  | 5.00     | 15.00%       | 18.00%     | 27.00%    | 27.00%    | 27.00%    | 27.00%     | 27.00%  | 27.00%  |
| GT | Series | 1239   | Company F  | USA     | NYSE     | Common | 600.00  | 610.00  | 590.00  | 605.00  | 6000000  | 6000000000  | 40.00    | 0.50%          | 40.00  | 6.00     | 15.00%       | 20.00%     | 30.00%    | 30.00%    | 30.00%    | 30.00%     | 30.00%  | 30.00%  |
| GT | Series | 1240   | Company G  | USA     | NYSE     | Common | 700.00  | 710.00  | 690.00  | 705.00  | 7000000  | 7000000000  | 45.00    | 0.40%          | 47.50  | 7.00     | 15.00%       | 22.00%     | 33.00%    | 33.00%    | 33.00%    | 33.00%     | 33.00%  | 33.00%  |
| GT | Series | 1241   | Company H  | USA     | NYSE     | Common | 800.00  | 810.00  | 790.00  | 805.00  | 8000000  | 8000000000  | 50.00    | 0.30%          | 55.00  | 8.00     | 15.00%       | 24.00%     | 36.00%    | 36.00%    | 36.00%    | 36.00%     | 36.00%  | 36.00%  |
| GT | Series | 1242   | Company I  | USA     | NYSE     | Common | 900.00  | 910.00  | 890.00  | 905.00  | 9000000  | 9000000000  | 55.00    | 0.20%          | 63.00  | 9.00     | 15.00%       | 26.00%     | 39.00%    | 39.00%    | 39.00%    | 39.00%     | 39.00%  | 39.00%  |
| GT | Series | 1243   | Company J  | USA     | NYSE     | Common | 1000.00 | 1010.00 | 990.00  | 1005.00 | 10000000 | 10000000000 | 60.00    | 0.10%          | 70.00  | 10.00    | 15.00%       | 28.00%     | 42.00%    | 42.00%    | 42.00%    | 42.00%     | 42.00%  | 42.00%  |
| GT | Series | 1244   | Company K  | USA     | NYSE     | Common | 1100.00 | 1110.00 | 1090.00 | 1105.00 | 11000000 | 11000000000 | 65.00    | 0.00%          | 77.00  | 11.00    | 15.00%       | 30.00%     | 45.00%    | 45.00%    | 45.00%    | 45.00%     | 45.00%  | 45.00%  |
| GT | Series | 1245   | Company L  | USA     | NYSE     | Common | 1200.00 | 1210.00 | 1190.00 | 1205.00 | 12000000 | 12000000000 | 70.00    | 0.00%          | 84.00  | 12.00    | 15.00%       | 32.00%     | 48.00%    | 48.00%    | 48.00%    | 48.00%     | 48.00%  | 48.00%  |
| GT | Series | 1246   | Company M  | USA     | NYSE     | Common | 1300.00 | 1310.00 | 1290.00 | 1305.00 | 13000000 | 13000000000 | 75.00    | 0.00%          | 91.00  | 13.00    | 15.00%       | 34.00%     | 51.00%    | 51.00%    | 51.00%    | 51.00%     | 51.00%  | 51.00%  |
| GT | Series | 1247   | Company N  | USA     | NYSE     | Common | 1400.00 | 1410.00 | 1390.00 | 1405.00 | 14000000 | 14000000000 | 80.00    | 0.00%          | 98.00  | 14.00    | 15.00%       | 36.00%     | 54.00%    | 54.00%    | 54.00%    | 54.00%     | 54.00%  | 54.00%  |
| GT | Series | 1248   | Company O  | USA     | NYSE     | Common | 1500.00 | 1510.00 | 1490.00 | 1505.00 | 15000000 | 15000000000 | 85.00    | 0.00%          | 105.00 | 15.00    | 15.00%       | 38.00%     | 57.00%    | 57.00%    | 57.00%    | 57.00%     | 57.00%  | 57.00%  |
| GT | Series | 1249   | Company P  | USA     | NYSE     | Common | 1600.00 | 1610.00 | 1590.00 | 1605.00 | 16000000 | 16000000000 | 90.00    | 0.00%          | 112.00 | 16.00    | 15.00%       | 40.00%     | 60.00%    | 60.00%    | 60.00%    | 60.00%     | 60.00%  | 60.00%  |
| GT | Series | 1250   | Company Q  | USA     | NYSE     | Common | 1700.00 | 1710.00 | 1690.00 | 1705.00 | 17000000 | 17000000000 | 95.00    | 0.00%          | 119.00 | 17.00    | 15.00%       | 42.00%     | 63.00%    | 63.00%    | 63.00%    | 63.00%     | 63.00%  | 63.00%  |
| GT | Series | 1251   | Company R  | USA     | NYSE     | Common | 1800.00 | 1810.00 | 1790.00 | 1805.00 | 18000000 | 18000000000 | 100.00   | 0.00%          | 126.00 | 18.00    | 15.00%       | 44.00%     | 66.00%    | 66.00%    | 66.00%    | 66.00%     | 66.00%  | 66.00%  |
| GT | Series | 1252   | Company S  | USA     | NYSE     | Common | 1900.00 | 1910.00 | 1890.00 | 1905.00 | 19000000 | 19000000000 | 105.00   | 0.00%          | 133.00 | 19.00    | 15.00%       | 46.00%     | 69.00%    | 69.00%    | 69.00%    | 69.00%     | 69.00%  | 69.00%  |
| GT | Series | 1253   | Company T  | USA     | NYSE     | Common | 2000.00 | 2010.00 | 1990.00 | 2005.00 | 20000000 | 20000000000 | 110.00   | 0.00%          | 140.00 | 20.00    | 15.00%       | 48.00%     | 72.00%    | 72.00%    | 72.00%    | 72.00%     | 72.00%  | 72.00%  |
| GT | Series | 1254   | Company U  | USA     | NYSE     | Common | 2100.00 | 2110.00 | 2090.00 | 2105.00 | 21000000 | 21000000000 | 115.00   | 0.00%          | 147.00 | 21.00    | 15.00%       | 50.00%     | 75.00%    | 75.00%    | 75.00%    | 75.00%     | 75.00%  | 75.00%  |
| GT | Series | 1255   | Company V  | USA     | NYSE     | Common | 2200.00 | 2210.00 | 2190.00 | 2205.00 | 22000000 | 22000000000 | 120.00   | 0.00%          | 154.00 | 22.00    | 15.00%       | 52.00%     | 78.00%    | 78.00%    | 78.00%    | 78.00%     | 78.00%  | 78.00%  |
| GT | Series | 1256   | Company W  | USA     | NYSE     | Common | 2300.00 | 2310.00 | 2290.00 | 2305.00 | 23000000 | 23000000000 | 125.00   | 0.00%          | 161.00 | 23.00    | 15.00%       | 54.00%     | 81.00%    | 81.00%    | 81.00%    | 81.00%     | 81.00%  | 81.00%  |
| GT | Series | 1257   | Company X  | USA     | NYSE     | Common | 2400.00 | 2410.00 | 2390.00 | 2405.00 | 24000000 | 24000000000 | 130.00   | 0.00%          | 168.00 | 24.00    | 15.00%       | 56.00%     | 84.00%    | 84.00%    | 84.00%    | 84.00%     | 84.00%  | 84.00%  |
| GT | Series | 1258   | Company Y  | USA     | NYSE     | Common | 2500.00 | 2510.00 | 2490.00 | 2505.00 | 25000000 | 25000000000 | 135.00   | 0.00%          | 175.00 | 25.00    | 15.00%       | 58.00%     | 87.00%    | 87.00%    | 87.00%    | 87.00%     | 87.00%  | 87.00%  |
| GT | Series | 1259   | Company Z  | USA     | NYSE     | Common | 2600.00 | 2610.00 | 2590.00 | 2605.00 | 26000000 | 26000000000 | 140.00   | 0.00%          | 182.00 | 26.00    | 15.00%       | 60.00%     | 90.00%    | 90.00%    | 90.00%    | 90.00%     | 90.00%  | 90.00%  |
| GT | Series | 1260   | Company AA | USA     | NYSE     | Common | 2700.00 | 2710.00 | 2690.00 | 2705.00 | 27000000 | 27000000000 | 145.00   | 0.00%          | 189.00 | 27.00    | 15.00%       | 62.00%     | 93.00%    | 93.00%    | 93.00%    | 93.00%     | 93.00%  | 93.00%  |
| GT | Series | 1261   | Company AB | USA     | NYSE     | Common | 2800.00 | 2810.00 | 2790.00 | 2805.00 | 28000000 | 28000000000 | 150.00   | 0.00%          | 196.00 | 28.00    | 15.00%       | 64.00%     | 96.00%    | 96.00%    | 96.00%    | 96.00%     | 96.00%  | 96.00%  |
| GT | Series | 1262   | Company AC | USA     | NYSE     | Common | 2900.00 | 2910.00 | 2890.00 | 2905.00 | 29000000 | 29000000000 | 155.00   | 0.00%          | 203.00 | 29.00    | 15.00%       | 66.00%     | 99.00%    | 99.00%    | 99.00%    | 99.00%     | 99.00%  | 99.00%  |
| GT | Series | 1263   | Company AD | USA     | NYSE     | Common | 3000.00 | 3010.00 | 2990.00 | 3005.00 | 30000000 | 30000000000 | 160.00   | 0.00%          | 210.00 | 30.00    | 15.00%       | 68.00%     | 102.00%   | 102.00%   | 102.00%   | 102.00%    | 102.00% | 102.00% |
| GT | Series | 1264   | Company AE | USA     | NYSE     | Common | 3100.00 | 3110.00 | 3090.00 | 3105.00 | 31000000 | 31000000000 | 165.00   | 0.00%          | 217.00 | 31.00    | 15.00%       | 70.00%     | 105.00%   | 105.00%   | 105.00%   | 105.00%    | 105.00% | 105.00% |
| GT | Series | 1265   | Company AF | USA     | NYSE     | Common | 3200.00 | 3210.00 | 3190.00 | 3205.00 | 32000000 | 32000000000 | 170.00   | 0.00%          | 224.00 | 32.00    | 15.00%       | 72.00%     | 108.00%   | 108.00%   | 108.00%   | 108.00%    | 108.00% | 108.00% |
| GT | Series | 1266   | Company AG | USA     | NYSE     | Common | 3300.00 | 3310.00 | 3290.00 | 3305.00 | 33000000 | 33000000000 | 175.00   | 0.00%          | 231.00 | 33.00    | 15.00%       | 74.00%     | 111.00%   | 111.00%   | 111.00%   | 111.00%    | 111.00% | 111.00% |
| GT | Series | 1267   | Company AH | USA     | NYSE     | Common | 3400.00 | 3410.00 | 3390.00 | 3405.00 | 34000000 | 34000000000 | 180.00   | 0.00%          | 238.00 | 34.00    | 15.00%       | 76.00%     | 114.00%   | 114.00%   | 114.00%   | 114.00%    | 114.00% | 114.00% |
| GT | Series | 1268   | Company AI | USA     | NYSE     | Common | 3500.00 | 3510.00 | 3490.00 | 3505.00 | 35000000 | 35000000000 | 185.00   | 0.00%          | 245.00 | 35.00    | 15.00%       | 78.00%     | 117.00%   | 117.00%   | 117.00%   | 117.00%    | 117.00% | 117.00% |
| GT | Series | 1269   | Company AJ | USA     | NYSE     | Common | 3600.00 | 3610.00 | 3590.00 | 3605.00 | 36000000 | 36000000000 | 190.00   | 0.00%          | 252.00 | 36.00    | 15.00%       | 80.00%     | 120.00%   | 120.00%   | 120.00%   | 120.00%    | 120.00% | 120.00% |
| GT | Series | 1270   | Company AK | USA     | NYSE     | Common | 3700.00 | 3710.00 | 3690.00 | 3705.00 | 37000000 | 37000000000 | 195.00   | 0.00%          | 259.00 | 37.00    | 15.00%       | 82.00%     | 123.00%   | 123.00%   | 123.00%   | 123.00%    | 123.00% | 123.00% |
| GT | Series | 1271   | Company AL | USA     | NYSE     | Common | 3800.00 | 3810.00 | 3790.00 | 3805.00 | 38000000 | 38000000000 | 200.00   | 0.00%          | 266.00 | 38.00    | 15.00%       | 84.00%     | 126.00%   | 126.00%   | 126.00%   | 126.00%    | 126.00% | 126.00% |
| GT | Series | 1272   | Company AM | USA     | NYSE     | Common | 3900.00 | 3910.00 | 3890.00 | 3905.00 | 39000000 | 39000000000 | 205.00   | 0.00%          | 273.00 | 39.00    | 15.00%       | 86.00%     | 129.00%   | 129.00%   | 129.00%   | 129.00%    | 129.00% | 129.00% |
| GT | Series | 1273   | Company AN | USA     | NYSE     | Common | 4000.00 | 4010.00 | 3990.00 | 4005.00 | 40000000 | 40000000000 | 210.00   | 0.00%          | 280.00 | 40.00    | 15.00%       | 88.00%     | 132.00%   | 132.00%   | 132.00%   | 132.00%    | 132.00% | 132.00% |
| GT | Series | 1274   | Company AO | USA     | NYSE     | Common | 4100.00 | 4110.00 | 4090.00 | 4105.00 | 41000000 | 41000000000 | 215.00   | 0.00%          | 287.00 | 41.00    | 15.00%       | 90.00%     | 135.00%   | 135.00%   | 135.00%   | 135.00%    | 135.00% | 135.00% |
| GT | Series | 1275   | Company AP | USA     | NYSE     | Common | 4200.00 | 4210.00 | 4190.00 | 4205.00 | 42000000 | 42000000000 | 220.00   | 0.00%          | 294.00 | 42.00    | 15.00%       | 92.00%     | 138.00%   | 138.00%   | 138.00%   | 138.00%    | 138.00% | 138.00% |
| GT | Series | 1276   | Company AQ | USA     | NYSE     | Common | 4300.00 | 4310.00 | 4290.00 | 4305.00 | 43000000 | 43000000000 | 225.00   | 0.00%          | 301.00 | 43.00    | 15.00%       | 94.00%     | 141.00%   | 141.00%   | 141.00%   | 141.00%    | 141.00% | 141.00% |
| GT | Series | 1277   | Company AR | USA     | NYSE     | Common | 4400.00 | 4410.00 | 4390.00 | 4405.00 | 44000000 | 44000000000 | 230.00   | 0.00%          | 308.00 | 44.00    | 15.00%       | 96.00%     | 144.00%   | 144.00%   | 144.00%   | 144.00%    | 144.00% | 144.00% |
| GT | Series | 1278   | Company AS | USA     | NYSE     |        |         |         |         |         |          |             |          |                |        |          |              |            |           |           |           |            |         |         |























| GO ID | GO ACCESSION          | GO Term                         | p-value | Count in Selection | % Count in Selection | Count in Total | % Count in Total |
|-------|-----------------------|---------------------------------|---------|--------------------|----------------------|----------------|------------------|
| 11776 | GO:0019825            | oxygen binding                  | 0.00    | 22                 | 3.7225041            | 389            | 1.1234008        |
| 3048  | GO:0004364            | glutathione transferase activ   | 0.00    | 9                  | 1.5228426            | 84             | 0.24258527       |
| 25094 | GO:0050789 GO:0050791 | regulation of biological proce  | 0.00    | 108                | 18.27411             | 4315           | 12.461374        |
| 11931 | GO:0020037            | heme binding                    | 0.00    | 24                 | 4.0609136            | 550            | 1.5883559        |
| 3872  | GO:0005506            | iron ion binding                | 0.00    | 24                 | 4.0609136            | 563            | 1.6258988        |
| 28364 | GO:0065007            | biological regulation           | 0.00    | 108                | 18.27411             | 4376           | 12.637537        |
| 25098 | GO:0050794 GO:0051244 | regulation of cellular process  | 0.00    | 100                | 16.920473            | 3987           | 11.514136        |
| 11224 | GO:0019222            | regulation of metabolic proce   | 0.00    | 81                 | 13.705584            | 3115           | 8.995871         |
| 4530  | GO:0006355 GO:0032583 | regulation of transcription, D  | 0.00    | 70                 | 11.844332            | 2591           | 7.4826           |
| 25544 | GO:0051252            | regulation of RNA metabolic     | 0.00    | 70                 | 11.844332            | 2593           | 7.488376         |
| 22409 | GO:0046906            | tetrapyrrole binding            | 0.00    | 24                 | 4.0609136            | 596            | 1.7212002        |
| 32213 | GO:2000112            | regulation of cellular macromol | 0.00    | 70                 | 11.844332            | 2605           | 7.523031         |
| 13756 | GO:0031326            | regulation of cellular biosynt  | 0.00    | 70                 | 11.844332            | 2605           | 7.523031         |
| 7141  | GO:0009889            | regulation of biosynthetic pro  | 0.00    | 70                 | 11.844332            | 2605           | 7.523031         |
| 7772  | GO:0010556            | regulation of macromolecule     | 0.00    | 70                 | 11.844332            | 2605           | 7.523031         |
| 7692  | GO:0010468            | regulation of gene expressio    | 0.00    | 70                 | 11.844332            | 2635           | 7.6096687        |
| 19590 | GO:0043295            | glutathione binding             | 0.00    | 5                  | 0.8460237            | 31             | 0.08952551       |
| 7074  | GO:0009815            | 1-aminocyclopropane-1-carb      | 0.00    | 6                  | 1.0152284            | 49             | 0.14150807       |
| 27228 | GO:0060255            | regulation of macromolecule     | 0.00    | 70                 | 11.844332            | 2660           | 7.6818666        |
| 13753 | GO:0031323            | regulation of cellular metabo   | 0.00    | 72                 | 12.182741            | 2770           | 7.999538         |
| 25468 | GO:0051171            | regulation of nitrogen compo    | 0.00    | 70                 | 11.844332            | 2675           | 7.7251854        |
| 11221 | GO:0019219            | regulation of nucleobase, nu    | 0.00    | 70                 | 11.844332            | 2675           | 7.7251854        |
| 31465 | GO:0090090            | regulation of primary metabo    | 0.00    | 70                 | 11.844332            | 2710           | 7.826263         |
| 19479 | GO:0043176            | amine binding                   | 0.00    | 7                  | 1.1844332            | 80             | 0.2310336        |
| 9682  | GO:0016597            | amino acid binding              | 0.00    | 7                  | 1.1844332            | 80             | 0.2310336        |
| 30700 | GO:0072341            | modified amino acid binding     | 0.00    | 6                  | 1.0152284            | 59             | 0.17038727       |
| 2986  | GO:0004252            | serine-type endopeptidase a     | 0.00    | 9                  | 1.5228426            | 144            | 0.41586044       |
| 6888  | GO:0009611 GO:0002245 | response to wounding            | 0.00    | 6                  | 1.0152284            | 66             | 0.1906027        |
| 9722  | GO:0016641            | oxidoreductase activity, actir  | 0.00    | 6                  | 1.0152284            | 69             | 0.19926646       |
| 5766  | GO:0008236            | serine-type peptidase activi    | 0.00    | 11                 | 1.8612521            | 214            | 0.6180149        |
| 4641  | GO:0006508            | proteolysis                     | 0.00    | 30                 | 5.0761423            | 965            | 2.7868426        |
| 13829 | GO:0031406            | carboxylic acid binding         | 0.00    | 7                  | 1.1844332            | 98             | 0.28301615       |
| 10103 | GO:0017171            | serine hydrolase activity       | 0.00    | 11                 | 1.8612521            | 220            | 0.63534236       |
| 9768  | GO:0016706            | oxidoreductase activity, actir  | 0.00    | 9                  | 1.5228426            | 175            | 0.505386         |
| 9719  | GO:0016638            | oxidoreductase activity, actir  | 0.00    | 6                  | 1.0152284            | 89             | 0.25702485       |
| 9767  | GO:0016705            | oxidoreductase activity, actir  | 0.00    | 13                 | 2.1996615            | 329            | 0.95012563       |
| 9818  | GO:0016765 GO:0016766 | transferase activity, transferr | 0.00    | 9                  | 1.5228426            | 185            | 0.53426516       |
| 5704  | GO:0008150 GO:0000040 | biological process              | 0.01    | 409                | 69.204735            | 22215          | 64.155138        |
| 20342 | GO:0044092            | negative regulation of molec    | 0.01    | 9                  | 1.5228426            | 188            | 0.54292893       |
| 19393 | GO:0043086            | negative regulation of cataly   | 0.01    | 9                  | 1.5228426            | 189            | 0.54292893       |
| 22375 | GO:0046872            | metal ion binding               | 0.01    | 69                 | 11.675127            | 2985           | 8.6204405        |
| 19470 | GO:0043167            | ion binding                     | 0.01    | 69                 | 11.675127            | 2997           | 8.655096         |
| 19472 | GO:0043169            | cation binding                  | 0.01    | 69                 | 11.675127            | 2997           | 8.655096         |
| 716   | GO:0001071            | nucleic acid binding transcrip  | 0.01    | 37                 | 6.2605753            | 1417           | 4.0921826        |
| 2643  | GO:0003700 GO:0000130 | sequence-specific DNA bind      | 0.01    | 37                 | 6.2605753            | 1417           | 4.0921826        |
| 3356  | GO:0004737            | pyruvate decarboxylase acti     | 0.01    | 2                  | 0.33840948           | 8              | 0.023103588      |
| 9600  | GO:0016491            | oxidoreductase activity         | 0.01    | 43                 | 7.2758036            | 1724           | 4.9787736        |
| 5097  | GO:0007049            | cell cycle                      | 0.01    | 4                  | 0.67681897           | 52             | 0.15017183       |
| 5678  | GO:0008113 GO:0033742 | peptide-methionine-(S)-S-ox     | 0.01    | 2                  | 0.33840948           | 10             | 0.0288792        |
| 4526  | GO:0006351 GO:0006350 | transcription, DNA-dependen     | 0.01    | 39                 | 6.5989847            | 1575           | 4.548474         |
| 15176 | GO:0032774            | RNA biosynthetic process        | 0.01    | 39                 | 6.5989847            | 1575           | 4.548474         |
| 2870  | GO:0004064            | arylesterase activity           | 0.01    | 3                  | 0.5076142            | 30             | 0.086637594      |
| 13809 | GO:0031386            | protein tag                     | 0.01    | 2                  | 0.33840948           | 11             | 0.03176712       |
| 26959 | GO:0055114            | oxidation-reduction process     | 0.01    | 57                 | 9.6446705            | 2490           | 7.1909204        |
| 5715  | GO:0008171            | O-methyltransferase activity    | 0.02    | 4                  | 0.67681897           | 57             | 0.16461143       |
| 12516 | GO:0022804            | active transmembrane transp     | 0.02    | 22                 | 3.7225041            | 787            | 2.2727928        |
| 3464  | GO:0004857            | enzyme inhibitor activity       | 0.02    | 7                  | 1.1844332            | 95             | 0.4534034        |
| 18633 | GO:0042277            | peptide binding                 | 0.02    | 5                  | 0.8460237            | 157            | 0.4534034        |
| 3318  | GO:0004693 GO:0016537 | cyclin-dependent protein kin    | 0.03    | 3                  | 0.5076142            | 37             | 0.10685303       |
| 12805 | GO:0030246            | carbohydrate binding            | 0.03    | 9                  | 1.5228426            | 251            | 0.7248679        |
| 3801  | GO:0005342            | organic acid transmembrane      | 0.03    | 6                  | 1.0152284            | 136            | 0.3927571        |
| 22444 | GO:0046943            | carboxylic acid transmembrane   | 0.03    | 6                  | 1.0152284            | 136            | 0.3927571        |
| 13435 | GO:0030976            | thiamine pyrophosphate bind     | 0.03    | 2                  | 0.33840948           | 16             | 0.046206716      |
| 18757 | GO:0042409            | caffeoyl-CoA O-methyltrans      | 0.03    | 2                  | 0.33840948           | 16             | 0.046206716      |
| 22412 | GO:0046910            | pectinesterase inhibitor activ  | 0.03    | 2                  | 0.33840948           | 16             | 0.046206716      |
| 22415 | GO:0046914            | transition metal ion binding    | 0.03    | 57                 | 9.6446705            | 2599           | 7.5057034        |
| 18738 | GO:0042389            | omega-3 fatty acid desaturat    | 0.03    | 2                  | 0.33840948           | 17             | 0.049094636      |
| 3719  | GO:0005201            | extracellular matrix structura  | 0.03    | 1                  | 0.16920474           | 2              | 0.00577584       |
| 5907  | GO:0008413            | 8-oxo-7,8-dihydroguanosine      | 0.03    | 1                  | 0.16920474           | 2              | 0.00577584       |
| 7409  | GO:0010177            | 2-[2-(methylthio)ethyl]malate   | 0.03    | 1                  | 0.16920474           | 2              | 0.00577584       |
| 7470  | GO:0010241            | ent-kaurene oxidation to kau    | 0.03    | 1                  | 0.16920474           | 2              | 0.00577584       |
| 8509  | GO:0015093            | ferrous iron transmembrane      | 0.03    | 1                  | 0.16920474           | 2              | 0.00577584       |
| 8612  | GO:0015204 GO:0015287 | urea transmembrane transp       | 0.03    | 1                  | 0.16920474           | 2              | 0.00577584       |
| 8953  | GO:0015684            | ferrous iron transport          | 0.03    | 1                  | 0.16920474           | 2              | 0.00577584       |
| 9106  | GO:0015840            | urea transport                  | 0.03    | 1                  | 0.16920474           | 2              | 0.00577584       |
| 11186 | GO:0019177            | dihydroneopterin triphosphat    | 0.03    | 1                  | 0.16920474           | 2              | 0.00577584       |
| 15726 | GO:0033331            | ent-kaurene metabolic proce     | 0.03    | 1                  | 0.16920474           | 2              | 0.00577584       |
| 19204 | GO:0042887            | amide transmembrane transp      | 0.03    | 1                  | 0.16920474           | 2              | 0.00577584       |
| 30280 | GO:0071918            | urea transmembrane transp       | 0.03    | 1                  | 0.16920474           | 2              | 0.00577584       |
| 10899 | GO:0018858            | benzoate-CoA ligase activity    | 0.04    | 2                  | 0.33840948           | 18             | 0.051982556      |
| 22917 | GO:0047429            | nucleoside-triphosphate diph    | 0.04    | 2                  | 0.33840948           | 18             | 0.051982556      |
| 31431 | GO:0080054            | low affinity nitrate transmem   | 0.04    | 3                  | 0.5076142            | 45             | 0.1299564        |
| 2975  | GO:0004175 GO:0016809 | endopeptidase activity          | 0.05    | 10                 | 1.6920474            | 320            | 0.9241344        |
| 19758 | GO:0043492            | ATPase activity, coupled to     | 0.05    | 8                  | 1.3536379            | 235            | 0.67866117       |
| 5921  | GO:0008428            | ribonuclease inhibitor activity | 0.05    | 1                  | 0.16920474           | 3              | 0.00866376       |
| 11784 | GO:0019838            | growth factor binding           | 0.05    | 3                  | 0.5076142            | 49             | 0.14150807       |
| 31421 | GO:0080044            | quercetin 7-O-glucosyltransf    | 0.05    | 3                  | 0.5076142            | 49             | 0.14150807       |
| 3874  | GO:0005509            | calcium ion binding             | 0.05    | 9                  | 1.5228426            | 279            | 0.8057296        |
| 9114  | GO:0015849            | organic acid transport          | 0.05    | 6                  | 1.0152284            | 156            | 0.45051548       |
| 22443 | GO:0046942            | carboxylic acid transport       | 0.05    | 6                  | 1.0152284            | 156            | 0.45051548       |
| 8584  | GO:0015171 GO:0015359 | amino acid transmembrane        | 0.05    | 5                  | 0.8460237            | 118            | 0.34077454       |
| 2521  | GO:0003333            | amino acid transmembrane        | 0.05    | 5                  | 0.8460237            | 118            | 0.34077454       |
| 8489  | GO:0015066            | alpha-amylase inhibitor activ   | 0.05    | 2                  | 0.33840948           | 22             | 0.06353424       |
| 12608 | GO:0030001            | metal ion transport             | 0.06    | 11                 | 1.8612521            | 374            | 1.080082         |
| 9806  | GO:0016752            | sinapoyltransferase activity    | 0.06    | 2                  | 0.33840948           | 23             | 0.06642216       |
| 9807  | GO:0016753            | O-sinapoyltransferase activi    | 0.06    | 2                  | 0.33840948           | 23             | 0.06642216       |
| 9808  | GO:0016754            | sinapoylglucosyl-malate O-si    | 0.06    | 2                  | 0.33840948           | 23             | 0.06642216       |
| 4951  | GO:0006865 GO:0006866 | amino acid transport            | 0.06    | 5                  | 0.8460237            | 123            | 0.35521415       |
| 19473 | GO:0043170 GO:0043283 | macromolecule metabolic pr      | 0.06    | 127                | 21.489002            | 6553           | 18.92454         |
| 8559  | GO:0015146            | pentose transmembrane tra       | 0.06    | 2                  | 0.33840948           | 24             | 0.06931008       |
| 8561  | GO:0015148            | D-xylose transmembrane tra      | 0.06    | 2                  | 0.33840948           | 24             | 0.06931008       |
| 8829  | GO:0015519            | D-xylose:hydrogen symporte      | 0.06    | 2                  | 0.33840948           | 24             | 0.06931008       |
| 9019  | GO:0015750            | pentose transport               | 0.06    | 2                  | 0.33840948           | 24             | 0.06931008       |
| 9022  | GO:0015753            | D-xylose transport              | 0.06    | 2                  | 0.33840948           | 24             | 0.06931008       |
| 5702  | GO:0008146            | sulfotransferase activity       | 0.06    | 3                  | 0.5076142            | 54             | 0.15594767       |
| 3761  | GO:0005275 GO:0005279 | amine transmembrane trans       | 0.07    | 5                  | 0.8460237            | 126            | 0.3638779        |
| 11522 | GO:0019538 GO:0006411 | protein metabolic process       | 0.07    | 83                 | 14.043993            | 4134           | 11.938661        |
| 4039  | GO:0005751 GO:0005752 | mitochondrial respiratory cha   | 0.07    | 1                  | 0.16920474           | 4              | 0.011551679      |
| 7511  | GO:0010285 GO:0043742 | L,L-diaminopimelate aminot      | 0.07    | 1                  | 0.16920474           | 4              | 0.011551679      |
| 8584  | GO:0015184            | L-cystine transmembrane tra     | 0.07    | 1                  | 0.16920474           | 4              | 0.011551679      |
| 9080  | GO:0015811            | L-cystine transport             | 0.07    | 1                  | 0.16920474           | 4              | 0.011551679      |
| 20901 | GO:0045277 GO:0045287 | respiratory chain complex IV    | 0.07    | 1                  | 0.16920474           | 4              | 0.011551679      |
| 21300 | GO:0045703            | ketoreductase activity          | 0.07    | 1                  | 0.16920474           | 4              | 0.011551679      |
| 31418 | GO:0080041            | ADP-ribose pyrophosphat         | 0.07    | 1                  | 0.16920474           | 4              | 0.011551679      |
| 31507 | GO:0080132            | fatty acid alpha-hydroxylase    | 0.07    | 1                  | 0.16920474           | 4              | 0.011551679      |



|       |                                  |                                                                               |      |    |            |      |             |
|-------|----------------------------------|-------------------------------------------------------------------------------|------|----|------------|------|-------------|
| 75    | GO:000099                        | sulfur amino acid transmembrane transport                                     | 0.07 | 1  | 0.16920474 | 4    | 0.011551679 |
| 77    | GO:0000101                       | sulfur amino acid transport                                                   | 0.07 | 1  | 0.16920474 | 4    | 0.011551679 |
| 21145 | GO:0045543                       | gibberellin 2-beta-dioxigenase activity                                       | 0.07 | 2  | 0.33840948 | 25   | 0.072197996 |
| 18956 | GO:0042626                       | ATPase activity, coupled to transmembrane transport                           | 0.07 | 7  | 1.1844332  | 211  | 0.6093511   |
| 17024 | GO:0034645 GO:0034961            | cellular macromolecule biosynthesis                                           | 0.07 | 43 | 7.2758036  | 1999 | 5.7729516   |
| 30066 | GO:0071702                       | organic substance transport                                                   | 0.07 | 14 | 2.3688664  | 529  | 1.5277096   |
| 9744  | GO:0016671                       | oxidoreductase activity, acting on NADPH and reduced flavin mononucleotide    | 0.07 | 2  | 0.33840948 | 26   | 0.075085916 |
| 9861  | GO:0016820                       | hydrolase activity, acting on ester bonds                                     | 0.07 | 7  | 1.1844332  | 212  | 0.612239    |
| 6428  | GO:0009059 GO:0043284            | macromolecule biosynthesis                                                    | 0.07 | 43 | 7.2758036  | 2003 | 5.7845035   |
| 9308  | GO:0016070                       | RNA metabolic process                                                         | 0.08 | 40 | 6.7681894  | 1855 | 5.3570914   |
| 8749  | GO:0015399                       | primary active transmembrane transport                                        | 0.08 | 8  | 1.3536379  | 260  | 0.75085914  |
| 8753  | GO:0015405                       | P-P-bond-hydrolysis-driven transmembrane transport                            | 0.08 | 8  | 1.3536379  | 260  | 0.75085914  |
| 17617 | GO:0035251                       | UDP-glucosyltransferase activity                                              | 0.08 | 7  | 1.1844332  | 218  | 0.62956655  |
| 9103  | GO:0015837                       | amine transport                                                               | 0.08 | 5  | 0.8460237  | 135  | 0.38986918  |
| 14850 | GO:0032442                       | phenylcoumaran benzylic ether synthase activity                               | 0.08 | 1  | 0.16920474 | 5    | 0.0144396   |
| 21949 | GO:0046424                       | ferulate 5-hydroxylase activity                                               | 0.08 | 1  | 0.16920474 | 5    | 0.0144396   |
| 11787 | GO:0019842                       | vitamin binding                                                               | 0.08 | 6  | 1.0152284  | 177  | 0.5111618   |
| 8526  | GO:0015112                       | nitrate transmembrane transport                                               | 0.09 | 3  | 0.5076142  | 61   | 0.1761631   |
| 8975  | GO:0015706 GO:0006872            | nitrate transport                                                             | 0.09 | 3  | 0.5076142  | 61   | 0.1761631   |
| 16430 | GO:0034046                       | poly(G) RNA binding                                                           | 0.09 | 4  | 0.67681897 | 100  | 0.28879198  |
| 3603  | GO:0005030                       | neurotrophin receptor activity                                                | 0.09 | 2  | 0.33840948 | 30   | 0.086637594 |
| 6216  | GO:0008810                       | cellulase activity                                                            | 0.09 | 2  | 0.33840948 | 30   | 0.086637594 |
| 19425 | GO:0043121                       | neurotrophin binding                                                          | 0.09 | 2  | 0.33840948 | 30   | 0.086637594 |
| 22049 | GO:0046527                       | glucosyltransferase activity                                                  | 0.09 | 8  | 1.3536379  | 270  | 0.77973837  |
| 25820 | GO:0051536                       | iron-sulfur cluster binding                                                   | 0.10 | 3  | 0.5076142  | 64   | 0.18482687  |
| 25824 | GO:0051540                       | metal cluster binding                                                         | 0.10 | 3  | 0.5076142  | 64   | 0.18482687  |
| 3197  | GO:0004550                       | nucleoside diphosphate kinase activity                                        | 0.10 | 1  | 0.16920474 | 6    | 0.01732752  |
| 3413  | GO:0004802                       | transketolase activity                                                        | 0.10 | 1  | 0.16920474 | 6    | 0.01732752  |
| 4375  | GO:0006165                       | nucleoside diphosphate phosphorylation                                        | 0.10 | 1  | 0.16920474 | 6    | 0.01732752  |
| 7250  | GO:0010012                       | steroid 22-alpha hydroxylase activity                                         | 0.10 | 1  | 0.16920474 | 6    | 0.01732752  |
| 9333  | GO:0016101                       | diterpenoid metabolic process                                                 | 0.10 | 1  | 0.16920474 | 6    | 0.01732752  |
| 9772  | GO:0016710                       | trans-cinnamate 4-monooxygenase activity                                      | 0.10 | 1  | 0.16920474 | 6    | 0.01732752  |
| 19203 | GO:0042886                       | amide transport                                                               | 0.10 | 1  | 0.16920474 | 6    | 0.01732752  |
| 30707 | GO:0072348                       | sulfur compound transport                                                     | 0.10 | 1  | 0.16920474 | 6    | 0.01732752  |
| 2702  | GO:0003852                       | 2-isopropylmalate synthase activity                                           | 0.10 | 1  | 0.16920474 | 6    | 0.01732752  |
| 2713  | GO:0003863                       | 3-methyl-2-oxobutanoate decarboxylase activity                                | 0.10 | 1  | 0.16920474 | 6    | 0.01732752  |
| 3073  | GO:0004397                       | histidine ammonia-lyase activity                                              | 0.10 | 1  | 0.16920474 | 6    | 0.01732752  |
| 5732  | GO:0008194                       | UDP-glucosyltransferase activity                                              | 0.10 | 9  | 1.5228426  | 322  | 0.9299102   |
| 21041 | GO:0045431                       | flavonol synthase activity                                                    | 0.10 | 2  | 0.33840948 | 32   | 0.09241343  |
| 25836 | GO:0051552                       | flavone metabolic process                                                     | 0.10 | 2  | 0.33840948 | 32   | 0.09241343  |
| 25837 | GO:0051553                       | flavone biosynthetic process                                                  | 0.10 | 2  | 0.33840948 | 32   | 0.09241343  |
| 25838 | GO:0051554                       | flavonol metabolic process                                                    | 0.10 | 2  | 0.33840948 | 32   | 0.09241343  |
| 25839 | GO:0051555                       | flavonol biosynthetic process                                                 | 0.10 | 2  | 0.33840948 | 32   | 0.09241343  |
| 3473  | GO:0004867                       | serine-type endopeptidase inhibitor activity                                  | 0.10 | 3  | 0.5076142  | 66   | 0.1906027   |
| 23515 | GO:0048037                       | cofactor binding                                                              | 0.11 | 9  | 1.5228426  | 327  | 0.94434977  |
| 24968 | GO:0050662                       | coenzyme binding                                                              | 0.11 | 6  | 1.0152284  | 191  | 0.5515927   |
| 7691  | GO:0010467                       | gene expression                                                               | 0.11 | 41 | 6.937394   | 1974 | 5.7007537   |
| 5114  | GO:0007067                       | mitosis                                                                       | 0.11 | 1  | 0.16920474 | 7    | 0.020215439 |
| 16115 | GO:0033729                       | anthocyanidin reductase activity                                              | 0.11 | 1  | 0.16920474 | 7    | 0.020215439 |
| 21149 | GO:0045548                       | phenylalanine ammonia-lyase activity                                          | 0.11 | 1  | 0.16920474 | 7    | 0.020215439 |
| 23710 | GO:0048285                       | organelle fission                                                             | 0.11 | 1  | 0.16920474 | 7    | 0.020215439 |
| 64    | GO:0000087                       | M phase of mitotic cell cycle                                                 | 0.11 | 1  | 0.16920474 | 7    | 0.020215439 |
| 213   | GO:0000279                       | M phase                                                                       | 0.11 | 1  | 0.16920474 | 7    | 0.020215439 |
| 214   | GO:0000280                       | nuclear division                                                              | 0.11 | 1  | 0.16920474 | 7    | 0.020215439 |
| 31420 | GO:0080043                       | quercetin 3-O-glucosyltransferase activity                                    | 0.11 | 3  | 0.5076142  | 69   | 0.19926646  |
| 7690  | GO:0010466                       | negative regulation of peptidase activity                                     | 0.12 | 4  | 0.67681897 | 110  | 0.31767118  |
| 12946 | GO:0030414                       | peptidase inhibitor activity                                                  | 0.12 | 4  | 0.67681897 | 110  | 0.31767118  |
| 25636 | GO:0051346                       | negative regulation of hydrolytic enzyme activity                             | 0.12 | 4  | 0.67681897 | 110  | 0.31767118  |
| 8679  | GO:0015297                       | antiporter activity                                                           | 0.12 | 5  | 0.8460237  | 152  | 0.4389638   |
| 8682  | GO:0015300                       | solute:solute antiporter activity                                             | 0.12 | 5  | 0.8460237  | 152  | 0.4389638   |
| 21146 | GO:0045544                       | gibberellin 20-oxidase activity                                               | 0.12 | 2  | 0.33840948 | 35   | 0.10107719  |
| 9740  | GO:0016667                       | oxidoreductase activity, acting on NADPH and reduced flavin mononucleotide    | 0.13 | 3  | 0.5076142  | 72   | 0.20793022  |
| 26711 | GO:0052547                       | regulation of peptidase activity                                              | 0.13 | 4  | 0.67681897 | 112  | 0.32344702  |
| 28100 | GO:0061134                       | peptidase regulator activity                                                  | 0.13 | 4  | 0.67681897 | 112  | 0.32344702  |
| 29081 | GO:0070717                       | poly-purine tract binding                                                     | 0.13 | 4  | 0.67681897 | 112  | 0.32344702  |
| 8739  | GO:0015385 GO:0015502            | sodium:hydrogen antiporter activity                                           | 0.13 | 2  | 0.33840948 | 36   | 0.10396511  |
| 3402  | GO:0004791                       | thioredoxin-disulfide reductase activity                                      | 0.13 | 1  | 0.16920474 | 8    | 0.023103358 |
| 3803  | GO:0005344 GO:0015033            | oxygen transporter activity                                                   | 0.13 | 1  | 0.16920474 | 8    | 0.023103358 |
| 4035  | GO:0005746                       | mitochondrial respiratory chain complex assembly                              | 0.13 | 1  | 0.16920474 | 8    | 0.023103358 |
| 6497  | GO:0009132                       | nucleoside diphosphate metabolism                                             | 0.13 | 1  | 0.16920474 | 8    | 0.023103358 |
| 7003  | GO:0009737                       | response to abscisic acid stimulus                                            | 0.13 | 1  | 0.16920474 | 8    | 0.023103358 |
| 7843  | GO:0010628                       | positive regulation of gene expression                                        | 0.13 | 1  | 0.16920474 | 8    | 0.023103358 |
| 8725  | GO:0015367                       | oxoglutarate:malate antiporter activity                                       | 0.13 | 1  | 0.16920474 | 8    | 0.023103358 |
| 8940  | GO:0015669                       | gas transport                                                                 | 0.13 | 1  | 0.16920474 | 8    | 0.023103358 |
| 8942  | GO:0015671                       | oxygen transport                                                              | 0.13 | 1  | 0.16920474 | 8    | 0.023103358 |
| 9011  | GO:0015742                       | alpha-ketoglutarate transporter activity                                      | 0.13 | 1  | 0.16920474 | 8    | 0.023103358 |
| 9680  | GO:0016595                       | glutamate binding                                                             | 0.13 | 1  | 0.16920474 | 8    | 0.023103358 |
| 21461 | GO:0045893 GO:0043193 GO:0005344 | positive regulation of transcription                                          | 0.13 | 1  | 0.16920474 | 8    | 0.023103358 |
| 22702 | GO:0047209                       | coniferyl-alcohol glucosyltransferase activity                                | 0.13 | 1  | 0.16920474 | 8    | 0.023103358 |
| 28833 | GO:0070469                       | respiratory chain                                                             | 0.13 | 1  | 0.16920474 | 8    | 0.023103358 |
| 30696 | GO:0072337                       | modified amino acid transport                                                 | 0.13 | 1  | 0.16920474 | 8    | 0.023103358 |
| 30708 | GO:0072349                       | modified amino acid transmembrane transport                                   | 0.13 | 1  | 0.16920474 | 8    | 0.023103358 |
| 3022  | GO:0004338                       | glucan exo-1,3-beta-glucosyltransferase activity, transfer of glucuronic acid | 0.13 | 1  | 0.16920474 | 8    | 0.023103358 |
| 9832  | GO:0016782                       | transferase activity, transfer of phosphate group                             | 0.13 | 3  | 0.5076142  | 74   | 0.21370606  |
| 30069 | GO:0071705                       | nitrogen compound transport                                                   | 0.13 | 6  | 1.0152284  | 202  | 0.5833598   |
| 26845 | GO:0052689                       | carboxylic ester hydrolase activity                                           | 0.13 | 13 | 2.1996615  | 538  | 1.5537009   |
| 9637  | GO:0016538 GO:0003751 GO:0005344 | cyclin-dependent protein kinase activity                                      | 0.14 | 2  | 0.33840948 | 38   | 0.10974095  |
| 24966 | GO:0050660                       | flavin adenine dinucleotide binding                                           | 0.14 | 4  | 0.67681897 | 118  | 0.34077454  |
| 7225  | GO:0009978                       | allene oxide synthase activity                                                | 0.14 | 1  | 0.16920474 | 9    | 0.025991278 |
| 13224 | GO:0030755                       | quercetin 3-O-methyltransferase activity                                      | 0.14 | 1  | 0.16920474 | 9    | 0.025991278 |
| 19342 | GO:0043027                       | caspace inhibitor activity                                                    | 0.14 | 1  | 0.16920474 | 9    | 0.025991278 |
| 19343 | GO:0043028                       | caspace regulator activity                                                    | 0.14 | 1  | 0.16920474 | 9    | 0.025991278 |
| 19458 | GO:0043154 GO:0001719            | negative regulation of caspace activity                                       | 0.14 | 1  | 0.16920474 | 9    | 0.025991278 |
| 19579 | GO:0043281 GO:0043026            | regulation of caspace activity                                                | 0.14 | 1  | 0.16920474 | 9    | 0.025991278 |
| 5891  | GO:0008395 GO:0008394            | steroid hydroxylase activity                                                  | 0.15 | 2  | 0.33840948 | 40   | 0.1155168   |
| 7072  | GO:0009813                       | flavonoid biosynthetic process                                                | 0.15 | 2  | 0.33840948 | 40   | 0.1155168   |
| 21058 | GO:0045454 GO:0030503 GO:0005344 | cell redox homeostasis                                                        | 0.15 | 6  | 1.0152284  | 211  | 0.6093511   |
| 3856  | GO:0005471 GO:0005349            | ATP:ADP antiporter activity                                                   | 0.16 | 1  | 0.16920474 | 10   | 0.0288792   |
| 4878  | GO:0006772                       | thiamine metabolic process                                                    | 0.16 | 1  | 0.16920474 | 10   | 0.0288792   |
| 6592  | GO:0009228                       | thiamine biosynthetic process                                                 | 0.16 | 1  | 0.16920474 | 10   | 0.0288792   |
| 7175  | GO:0009924                       | octadecanal decarboxylase activity                                            | 0.16 | 1  | 0.16920474 | 10   | 0.0288792   |
| 9741  | GO:0016668 GO:0016654            | oxidoreductase activity, acting on NADPH and reduced flavin mononucleotide    | 0.16 | 1  | 0.16920474 | 10   | 0.0288792   |
| 26022 | GO:0051740                       | ethylene binding                                                              | 0.16 | 1  | 0.16920474 | 10   | 0.0288792   |
| 30135 | GO:0071771                       | aldehyde decarboxylase activity                                               | 0.16 | 1  | 0.16920474 | 10   | 0.0288792   |
| 30687 | GO:0072328                       | alkene binding                                                                | 0.16 | 1  | 0.16920474 | 10   | 0.0288792   |
| 22376 | GO:0046873                       | metal ion transmembrane transport                                             | 0.16 | 6  | 1.0152284  | 213  | 0.6151269   |
| 3718  | GO:0005200                       | structural constituent of cytoskeleton                                        | 0.16 | 2  | 0.33840948 | 42   | 0.121292636 |
| 4911  | GO:0006812 GO:0006819 GO:0005344 | cation transport                                                              | 0.16 | 15 | 2.5380712  | 662  | 1.9118029   |
| 9849  | GO:0016803                       | ether hydrolase activity                                                      | 0.17 | 1  | 0.16920474 | 11   | 0.03176712  |
| 12469 | GO:0022402                       | cell cycle process                                                            | 0.17 | 1  | 0.16920474 | 11   | 0.03176712  |
| 12470 | GO:0022403                       | cell cycle phase                                                              | 0.17 | 1  | 0.16920474 | 11   | 0.03176712  |
| 16183 | GO:0033799                       | myricetin 3-O-methyltransferase activity                                      | 0.17 | 1  | 0.16920474 | 11   | 0.03176712  |
| 212   | GO:0000278                       | mitotic cell cycle                                                            | 0.17 | 1  | 0.16920474 | 11   | 0.03176712  |
| 2989  | GO:0004301                       | epoxide hydrolase activity                                                    | 0.17 | 1  | 0.16920474 | 11   | 0.03176712  |
| 7071  | GO:0009812                       | flavonoid metabolic process                                                   | 0.17 | 2  | 0.33840948 | 44   | 0.12706847  |
| 3476  | GO:0004872 GO:0019041            | receptor activity                                                             | 0.18 | 15 | 2.5380712  | 672  | 1.9406822   |
| 8666  | GO:0015276                       | ligand-gated ion channel activity                                             | 0.18 | 2  | 0.33840948 | 45   | 0.1299564   |
| 12530 | GO:0022834                       | ligand-gated channel activity                                                 | 0.18 | 2  | 0.33840948 | 45   | 0.1299564   |
| 4786  | GO:0006664                       | glycolipid metabolic process                                                  | 0.19 | 1  | 0.16920474 | 12   | 0.03465504  |
| 6610  | GO:0009247                       | glycolipid biosynthetic process                                               | 0.19 | 1  | 0.16920474 | 12   | 0.03465504  |
| 7526  | GO:0010301 GO:0033710            | xanthoxin dehydrogenase activity                                              | 0.19 | 1  | 0.16920474 | 12   | 0.03465504  |
| 9704  | GO:0016621                       | cinnamoyl-CoA reductase activity                                              | 0.19 | 1  | 0.16920474 | 12   | 0.03465504  |



|       |                          |                                  |      |    |            |      |             |
|-------|--------------------------|----------------------------------|------|----|------------|------|-------------|
| 14848 | GO:0032440               | 2-alkenal reductase activity     | 0.19 | 1  | 0.16920474 | 12   | 0.03465504  |
| 19047 | GO:0042723               | thiamine-containing compou       | 0.19 | 1  | 0.16920474 | 12   | 0.03465504  |
| 19048 | GO:0042724               | thiamine-containing compou       | 0.19 | 1  | 0.16920474 | 12   | 0.03465504  |
| 21503 | GO:0045935               | positive regulation of nucleot   | 0.19 | 1  | 0.16920474 | 12   | 0.03465504  |
| 21992 | GO:0046467               | membrane lipid biosynthetic      | 0.19 | 1  | 0.16920474 | 12   | 0.03465504  |
| 25470 | GO:0051173               | positive regulation of nitroge   | 0.19 | 1  | 0.16920474 | 12   | 0.03465504  |
| 25546 | GO:0051254               | positive regulation of RNA m     | 0.19 | 1  | 0.16920474 | 12   | 0.03465504  |
| 6427  | GO:0009058               | biosynthetic process             | 0.19 | 54 | 9.137055   | 2796 | 8.074624    |
| 4032  | GO:0005743               | mitochondrial inner membra       | 0.19 | 3  | 0.5076142  | 88   | 0.25413695  |
| 3475  | GO:0004871 GO:0005062 GO | signal transducer activity       | 0.19 | 17 | 2.8764806  | 787  | 2.2727928   |
| 27063 | GO:0060089               | molecular transducer activity    | 0.19 | 17 | 2.8764806  | 787  | 2.2727928   |
| 12547 | GO:0022857 GO:0005386 GO | transmembrane transporter        | 0.19 | 30 | 5.0761423  | 1483 | 4.282785    |
| 4990  | GO:0006915 GO:0008632    | apoptosis                        | 0.19 | 6  | 1.0152284  | 227  | 0.6555578   |
| 21331 | GO:0045735               | nutrient reservoir activity      | 0.19 | 3  | 0.5076142  | 89   | 0.25702485  |
| 3449  | GO:0004842 GO:0004840 GO | ubiquitin-protein ligase activi  | 0.19 | 8  | 1.3536379  | 326  | 0.94146186  |
| 7551  | GO:0010327               | acetyl CoA:(Z)-3-hexen-1-ol      | 0.20 | 1  | 0.16920474 | 13   | 0.037542958 |
| 8149  | GO:0010941               | regulation of cell death         | 0.20 | 1  | 0.16920474 | 13   | 0.037542958 |
| 13443 | GO:0030984               | kininogen binding                | 0.20 | 1  | 0.16920474 | 13   | 0.037542958 |
| 19298 | GO:0042981               | regulation of apoptosis          | 0.20 | 1  | 0.16920474 | 13   | 0.037542958 |
| 19381 | GO:0043067 GO:0043070    | regulation of programmed ce      | 0.20 | 1  | 0.16920474 | 13   | 0.037542958 |
| 25095 | GO:0050790               | regulation of catalytic activity | 0.20 | 11 | 1.8612521  | 490  | 1.3862015   |
| 4909  | GO:0006810 GO:0015457 GO | transport                        | 0.20 | 45 | 7.614213   | 2315 | 6.6855345   |
| 25529 | GO:0051234               | establishment of localization    | 0.20 | 45 | 7.614213   | 2315 | 6.6855345   |
| 3844  | GO:0005451               | monovalent cation:hydrogen       | 0.20 | 2  | 0.33840948 | 49   | 0.14150807  |
| 6483  | GO:0009116               | nucleoside metabolic proces      | 0.20 | 2  | 0.33840948 | 49   | 0.14150807  |
| 25476 | GO:0051179               | localization                     | 0.20 | 45 | 7.614213   | 2319 | 6.697086    |
| 28366 | GO:0065009               | regulation of molecular functi   | 0.21 | 11 | 1.8612521  | 484  | 1.3977532   |
| 9654  | GO:0016567               | protein ubiquitination           | 0.21 | 8  | 1.3536379  | 332  | 0.9587894   |
| 14854 | GO:0032446               | protein modification by small    | 0.21 | 8  | 1.3536379  | 332  | 0.9587894   |
| 29011 | GO:0070647               | protein modification by small    | 0.21 | 8  | 1.3536379  | 332  | 0.9587894   |
| 4408  | GO:0006200               | ATP catabolic process            | 0.21 | 14 | 2.3688664  | 641  | 1.8511566   |
| 9918  | GO:0016887 GO:0004002    | ATPase activity                  | 0.21 | 14 | 2.3688664  | 641  | 1.8511566   |
| 21600 | GO:0046034               | ATP metabolic process            | 0.21 | 14 | 2.3688664  | 641  | 1.8511566   |
| 4910  | GO:0006811               | ion transport                    | 0.21 | 20 | 3.3840947  | 959  | 2.769515    |
| 28378 | GO:0070011               | peptidase activity, acting on    | 0.21 | 12 | 2.0304568  | 537  | 1.550813    |
| 11695 | GO:0019725               | cellular homeostasis             | 0.21 | 6  | 1.0152284  | 234  | 0.67577326  |
| 5195  | GO:0007165 GO:0023033    | signal transduction              | 0.21 | 20 | 3.3840947  | 961  | 2.775291    |
| 12602 | GO:0023052 GO:0023046    | signaling                        | 0.21 | 20 | 3.3840947  | 961  | 2.775291    |
| 7660  | GO:0010436               | carotenoid dioxygenase activi    | 0.21 | 1  | 0.16920474 | 14   | 0.040430877 |
| 8553  | GO:0015140               | malate transmembrane transp      | 0.21 | 1  | 0.16920474 | 14   | 0.040430877 |
| 8859  | GO:0015556               | C4-dicarboxylate transmembr      | 0.21 | 1  | 0.16920474 | 14   | 0.040430877 |
| 9009  | GO:0015740               | C4-dicarboxylate transport       | 0.21 | 1  | 0.16920474 | 14   | 0.040430877 |
| 9012  | GO:0015743               | malate transport                 | 0.21 | 1  | 0.16920474 | 14   | 0.040430877 |
| 9399  | GO:0016174               | NAD(P)H oxidase activity         | 0.21 | 1  | 0.16920474 | 14   | 0.040430877 |
| 9847  | GO:0016801               | hydrolase activity, acting on    | 0.21 | 1  | 0.16920474 | 14   | 0.040430877 |
| 9879  | GO:0016841               | ammonia-lyase activity           | 0.21 | 1  | 0.16920474 | 14   | 0.040430877 |
| 11157 | GO:0019144               | ADP-sugar diphosphatase a        | 0.21 | 1  | 0.16920474 | 14   | 0.040430877 |
| 17616 | GO:0035250               | UDP-galactose 4-epimerase a      | 0.21 | 1  | 0.16920474 | 14   | 0.040430877 |
| 21150 | GO:0045549               | 9-cis-epoxycarotenoid dioxy      | 0.21 | 1  | 0.16920474 | 14   | 0.040430877 |
| 24970 | GO:0050664               | oxidoreductase activity, actin   | 0.21 | 1  | 0.16920474 | 14   | 0.040430877 |
| 29787 | GO:0071423               | malate transmembrane trans       | 0.21 | 1  | 0.16920474 | 14   | 0.040430877 |
| 31408 | GO:0080031               | methyl salicylate esterase ac    | 0.21 | 1  | 0.16920474 | 14   | 0.040430877 |
| 3808  | GO:0005351 GO:0005403    | sugar:hydrogen symporter a       | 0.22 | 3  | 0.5076142  | 94   | 0.27146447  |
| 3835  | GO:0005402               | cation:sugar symporter activ     | 0.22 | 3  | 0.5076142  | 94   | 0.27146447  |
| 11803 | GO:0019866               | organelle inner membrane         | 0.22 | 3  | 0.5076142  | 94   | 0.27146447  |
| 2657  | GO:0003727 GO:0003728    | single-stranded RNA binding      | 0.22 | 5  | 0.8460237  | 188  | 0.54292893  |
| 3472  | GO:0004866               | endopeptidase inhibitor activ    | 0.22 | 3  | 0.5076142  | 95   | 0.27435237  |
| 8159  | GO:0010951               | negative regulation of endop     | 0.22 | 3  | 0.5076142  | 95   | 0.27435237  |
| 11712 | GO:0019748               | secondary metabolic proces       | 0.22 | 3  | 0.5076142  | 95   | 0.27435237  |
| 26712 | GO:0052548               | regulation of endopeptidase      | 0.22 | 3  | 0.5076142  | 95   | 0.27435237  |
| 28101 | GO:0061135               | endopeptidase regulator acti     | 0.22 | 3  | 0.5076142  | 95   | 0.27435237  |
| 6965  | GO:0009699               | phenylpropanoid biosynthetic     | 0.22 | 2  | 0.33840948 | 52   | 0.15017183  |
| 2809  | GO:0003993               | acid phosphatase activity        | 0.22 | 2  | 0.33840948 | 52   | 0.15017183  |
| 18925 | GO:0042592               | homeostatic process              | 0.22 | 6  | 1.0152284  | 238  | 0.68732494  |
| 11747 | GO:0019787 GO:0008639 GO | small conjugating protein lig    | 0.22 | 8  | 1.3536379  | 339  | 0.9790048   |
| 5756  | GO:0008219               | cell death                       | 0.23 | 6  | 1.0152284  | 239  | 0.69021285  |
| 8209  | GO:0012501 GO:0016244    | programmed cell death            | 0.23 | 6  | 1.0152284  | 239  | 0.69021285  |
| 9462  | GO:0016265               | death                            | 0.23 | 6  | 1.0152284  | 239  | 0.69021285  |
| 7520  | GO:0010294               | abscisic acid glucosyltransfe    | 0.23 | 1  | 0.16920474 | 15   | 0.043318797 |
| 10079 | GO:0017134               | fibroblast growth factor bindi   | 0.23 | 1  | 0.16920474 | 15   | 0.043318797 |
| 14101 | GO:0031683               | G-protein beta/gamma-subu        | 0.23 | 1  | 0.16920474 | 15   | 0.043318797 |
| 2868  | GO:0004062               | aryl sulfotransferase activity   | 0.23 | 1  | 0.16920474 | 15   | 0.043318797 |
| 8677  | GO:0015295               | solute:hydrogen symporter a      | 0.23 | 3  | 0.5076142  | 98   | 0.28301615  |
| 8681  | GO:0015299               | solute:hydrogen antiporter a     | 0.23 | 3  | 0.5076142  | 98   | 0.28301615  |
| 20499 | GO:0044249               | cellular biosynthetic process    | 0.24 | 50 | 8.460237   | 2635 | 7.6096687   |
| 2897  | GO:0004091 GO:0004302 GO | carboxylesterase activity        | 0.24 | 5  | 0.8460237  | 194  | 0.5602564   |
| 3382  | GO:0004768 GO:0016214 GO | stearyl-CoA 9-desaturase a       | 0.24 | 1  | 0.16920474 | 16   | 0.046206716 |
| 3742  | GO:0005242               | inward rectifier potassium ch    | 0.24 | 1  | 0.16920474 | 16   | 0.046206716 |
| 3782  | GO:0005310 GO:0005312 GO | dicarboxylic acid transmembr     | 0.24 | 1  | 0.16920474 | 16   | 0.046206716 |
| 3829  | GO:0005381 GO:0005382 GO | iron ion transmembrane tran      | 0.24 | 1  | 0.16920474 | 16   | 0.046206716 |
| 4767  | GO:0006643               | membrane lipid metabolic pr      | 0.24 | 1  | 0.16920474 | 16   | 0.046206716 |
| 4928  | GO:0006835 GO:0006841    | dicarboxylic acid transport      | 0.24 | 1  | 0.16920474 | 16   | 0.046206716 |
| 7178  | GO:0009927               | histidine phosphotransfer kin    | 0.24 | 1  | 0.16920474 | 16   | 0.046206716 |
| 9386  | GO:0016157               | sucrose synthase activity        | 0.24 | 1  | 0.16920474 | 16   | 0.046206716 |
| 9427  | GO:0016215               | CoA desaturase activity          | 0.24 | 1  | 0.16920474 | 16   | 0.046206716 |
| 9878  | GO:0016840               | carbon-nitrogen lyase activi     | 0.24 | 1  | 0.16920474 | 16   | 0.046206716 |
| 17134 | GO:0034755               | iron ion transmembrane tran      | 0.24 | 1  | 0.16920474 | 16   | 0.046206716 |
| 31396 | GO:0080019               | fatty-acyl-CoA reductase (ak     | 0.24 | 1  | 0.16920474 | 16   | 0.046206716 |
| 9533  | GO:0016405               | CoA-ligase activity              | 0.24 | 2  | 0.33840948 | 55   | 0.15883559  |
| 5874  | GO:0008374               | O-acyltransferase activity       | 0.25 | 3  | 0.5076142  | 102  | 0.29456782  |
| 12794 | GO:0030234               | enzyme regulator activity        | 0.25 | 9  | 1.5228426  | 403  | 1.1638317   |
| 4446  | GO:0006241               | CTP biosynthetic process         | 0.25 | 1  | 0.16920474 | 17   | 0.049094636 |
| 6507  | GO:0009142               | nucleoside triphosphate bios     | 0.25 | 1  | 0.16920474 | 17   | 0.049094636 |
| 6513  | GO:0009148               | pyrimidine nucleoside triphos    | 0.25 | 1  | 0.16920474 | 17   | 0.049094636 |
| 6565  | GO:0009201               | ribonucleoside triphosphate      | 0.25 | 1  | 0.16920474 | 17   | 0.049094636 |
| 6572  | GO:0009208               | pyrimidine ribonucleoside tri    | 0.25 | 1  | 0.16920474 | 17   | 0.049094636 |
| 6573  | GO:0009209               | pyrimidine ribonucleoside tri    | 0.25 | 1  | 0.16920474 | 17   | 0.049094636 |
| 8585  | GO:0015172               | acidic amino acid transmem       | 0.25 | 1  | 0.16920474 | 17   | 0.049094636 |
| 9069  | GO:0015800               | acidic amino acid transport      | 0.25 | 1  | 0.16920474 | 17   | 0.049094636 |
| 21602 | GO:0046036 GO:0006243    | CTP metabolic process            | 0.25 | 1  | 0.16920474 | 17   | 0.049094636 |
| 9910  | GO:0016878               | acid-thiol ligase activity       | 0.25 | 2  | 0.33840948 | 57   | 0.16461143  |
| 4913  | GO:0006814 GO:0006834 GO | sodium ion transport             | 0.26 | 2  | 0.33840948 | 58   | 0.16749935  |
| 8499  | GO:0015081 GO:0022816    | sodium ion transmembrane         | 0.26 | 2  | 0.33840948 | 58   | 0.16749935  |
| 8558  | GO:0015145               | monosaccharide transmembr        | 0.26 | 2  | 0.33840948 | 58   | 0.16749935  |
| 9018  | GO:0015749               | monosaccharide transport         | 0.26 | 2  | 0.33840948 | 58   | 0.16749935  |
| 11820 | GO:0019887               | protein kinase regulator activ   | 0.26 | 2  | 0.33840948 | 58   | 0.16749935  |
| 18086 | GO:0035725               | sodium ion transmembrane         | 0.26 | 2  | 0.33840948 | 58   | 0.16749935  |
| 29800 | GO:0071436               | sodium ion export                | 0.26 | 2  | 0.33840948 | 58   | 0.16749935  |
| 5763  | GO:0008233               | peptidase activity               | 0.26 | 12 | 2.0304568  | 565  | 1.6316746   |
| 4357  | GO:0006139 GO:0055134    | nucleobase, nucleoside, nuc      | 0.26 | 61 | 10.321489  | 3285 | 9.486816    |
| 8673  | GO:0015291 GO:0015290 GO | secondary active transmembr      | 0.26 | 9  | 1.5228426  | 407  | 1.1753833   |
| 26931 | GO:0055085               | transmembrane transport          | 0.26 | 30 | 5.0761423  | 1548 | 4.4705      |
| 3832  | GO:0005388               | calcium-transporting ATPase      | 0.27 | 1  | 0.16920474 | 18   | 0.051982556 |
| 4134  | GO:0005874               | microtubule                      | 0.27 | 1  | 0.16920474 | 18   | 0.051982556 |
| 4225  | GO:0005985               | sucrose metabolic process        | 0.27 | 1  | 0.16920474 | 18   | 0.051982556 |
| 7773  | GO:0010557               | positive regulation of macrom    | 0.27 | 1  | 0.16920474 | 18   | 0.051982556 |
| 12887 | GO:0030332               | cyclin binding                   | 0.27 | 1  | 0.16920474 | 18   | 0.051982556 |
| 19253 | GO:0042936               | dipeptide transporter activity   | 0.27 | 3  | 0.5076142  | 105  | 0.3032316   |
| 19255 | GO:0042938               | dipeptide transport              | 0.27 | 3  | 0.5076142  | 105  | 0.3032316   |
| 3333  | GO:0004712               | protein serine/threonine/tyros   | 0.27 | 2  | 0.33840948 | 59   | 0.17038727  |
| 31895 | GO:0090304               | nucleic acid metabolic proces    | 0.27 | 44 | 7.4450083  | 2340 | 6.7577324   |
| 4840  | GO:0006720 GO:0016096    | isoprenoid metabolic proces      | 0.27 | 2  | 0.33840948 | 60   | 0.17327519  |



|       |                        |                                 |      |     |            |       |             |
|-------|------------------------|---------------------------------|------|-----|------------|-------|-------------|
| 6964  | GO:0009698             | phenylpropanoid metabolic p     | 0.27 | 2   | 0.33840948 | 60    | 0.17327519  |
| 14811 | GO:0032403             | protein complex binding         | 0.27 | 2   | 0.33840948 | 60    | 0.17327519  |
| 28375 | GO:0070008             | serine-type exopeptidase ac     | 0.27 | 2   | 0.33840948 | 60    | 0.17327519  |
| 2980  | GO:0004185             | serine-type carboxypeptidase    | 0.27 | 2   | 0.33840948 | 60    | 0.17327519  |
| 3290  | GO:0004656             | procollagen-proline 4-dioxyg    | 0.28 | 1   | 0.16920474 | 19    | 0.054870475 |
| 11752 | GO:0019798             | procollagen-proline dioxygen    | 0.28 | 1   | 0.16920474 | 19    | 0.054870475 |
| 13966 | GO:0031543             | peptidyl-proline dioxygenase    | 0.28 | 1   | 0.16920474 | 19    | 0.054870475 |
| 13968 | GO:0031545             | peptidyl-proline 4-dioxygen     | 0.28 | 1   | 0.16920474 | 19    | 0.054870475 |
| 5705  | GO:0008152             | metabolic process               | 0.28 | 305 | 51.607445  | 17432 | 50.34222    |
| 4954  | GO:0006869             | lipid transport                 | 0.28 | 5   | 0.8460237  | 208   | 0.6006873   |
| 8085  | GO:0010876             | lipid localization              | 0.28 | 5   | 0.8460237  | 208   | 0.6006873   |
| 20488 | GO:0044238             | primary metabolic process       | 0.28 | 163 | 27.580372  | 9167  | 26.47356    |
| 3888  | GO:0005529             | sugar binding                   | 0.28 | 4   | 0.67681897 | 158   | 0.45629135  |
| 6018  | GO:0008559(GO:0005226) | xenobiotic-transporting ATPa    | 0.29 | 2   | 0.33840948 | 62    | 0.17905103  |
| 11210 | GO:0019207             | kinase regulator activity       | 0.29 | 2   | 0.33840948 | 62    | 0.17905103  |
| 19225 | GO:0042908             | xenobiotic transport            | 0.29 | 2   | 0.33840948 | 62    | 0.17905103  |
| 19227 | GO:0042910             | xenobiotic transporter activit  | 0.29 | 2   | 0.33840948 | 62    | 0.17905103  |
| 2978  | GO:0004180             | carboxypeptidase activity       | 0.29 | 2   | 0.33840948 | 62    | 0.17905103  |
| 4921  | GO:0006826(GO:0015681) | iron ion transport              | 0.29 | 1   | 0.16920474 | 20    | 0.0577584   |
| 9707  | GO:0016624             | oxidoreductase activity, actin  | 0.29 | 1   | 0.16920474 | 20    | 0.0577584   |
| 9799  | GO:0016744(GO:0016745) | transferase activity, transfer  | 0.29 | 1   | 0.16920474 | 20    | 0.0577584   |
| 8680  | GO:0015298             | solute:cation antiporter activ  | 0.30 | 3   | 0.5076142  | 112   | 0.32344702  |
| 9730  | GO:0016651             | oxidoreductase activity, actin  | 0.30 | 3   | 0.5076142  | 112   | 0.32344702  |
| 3364  | GO:0004745             | retinol dehydrogenase activit   | 0.30 | 1   | 0.16920474 | 21    | 0.060646318 |
| 3474  | GO:0004869(GO:0004870) | cysteine-type endopeptidase     | 0.30 | 1   | 0.16920474 | 21    | 0.060646318 |
| 4420  | GO:0006213             | pyrimidine nucleoside metab     | 0.30 | 1   | 0.16920474 | 21    | 0.060646318 |
| 5878  | GO:0008378             | galactosyltransferase activit   | 0.30 | 1   | 0.16920474 | 21    | 0.060646318 |
| 6582  | GO:0009218             | pyrimidine ribonucleotide me    | 0.30 | 1   | 0.16920474 | 21    | 0.060646318 |
| 6584  | GO:0009220             | pyrimidine ribonucleotide bio   | 0.30 | 1   | 0.16920474 | 21    | 0.060646318 |
| 21697 | GO:0046131             | pyrimidine ribonucleotide me    | 0.30 | 1   | 0.16920474 | 21    | 0.060646318 |
| 9933  | GO:0016903             | oxidoreductase activity, actin  | 0.30 | 3   | 0.5076142  | 113   | 0.32633495  |
| 9710  | GO:0016628             | oxidoreductase activity, actin  | 0.30 | 2   | 0.33840948 | 65    | 0.18771479  |
| 14379 | GO:0031966             | mitochondrial membrane          | 0.31 | 3   | 0.5076142  | 114   | 0.32922286  |
| 9422  | GO:0016209             | antioxidant activity            | 0.31 | 4   | 0.67681897 | 165   | 0.47650677  |
| 5840  | GO:0008324             | cation transmembrane transp     | 0.31 | 11  | 1.8612521  | 538   | 1.5537009   |
| 7143  | GO:0009891             | positive regulation of biosynt  | 0.32 | 1   | 0.16920474 | 22    | 0.06353424  |
| 8774  | GO:0015431             | glutathione S-conjugate-exp     | 0.32 | 1   | 0.16920474 | 22    | 0.06353424  |
| 10032 | GO:0017075             | svntaxin-1 binding              | 0.32 | 1   | 0.16920474 | 22    | 0.06353424  |
| 12660 | GO:0030077             | plasma membrane light-harv      | 0.32 | 1   | 0.16920474 | 22    | 0.06353424  |
| 13038 | GO:0030551             | cyclic nucleotide binding       | 0.32 | 1   | 0.16920474 | 22    | 0.06353424  |
| 13758 | GO:0031328             | positive regulation of cellular | 0.32 | 1   | 0.16920474 | 22    | 0.06353424  |
| 18438 | GO:0042054             | histone methyltransferase ac    | 0.32 | 1   | 0.16920474 | 22    | 0.06353424  |
| 19040 | GO:0042716             | plasma membrane-derived c       | 0.32 | 1   | 0.16920474 | 22    | 0.06353424  |
| 19325 | GO:0043008             | ATP-dependent protein bind      | 0.32 | 1   | 0.16920474 | 22    | 0.06353424  |
| 30359 | GO:0071997             | glutathione S-conjugate-tran    | 0.32 | 1   | 0.16920474 | 22    | 0.06353424  |
| 4609  | GO:0006464             | protein modification process    | 0.32 | 51  | 8.629441   | 2781  | 8.031305    |
| 2674  | GO:0003824             | catalytic activity              | 0.32 | 189 | 31.979696  | 10750 | 31.045137   |
| 3986  | GO:0005681             | spliceosomal complex            | 0.33 | 1   | 0.16920474 | 23    | 0.06642216  |
| 5636  | GO:0008061             | chitin binding                  | 0.33 | 1   | 0.16920474 | 23    | 0.06642216  |
| 6512  | GO:0009147             | pyrimidine nucleoside triphos   | 0.33 | 1   | 0.16920474 | 23    | 0.06642216  |
| 7527  | GO:0010302             | 2-oxoqlutarate-dependent di     | 0.33 | 1   | 0.16920474 | 23    | 0.06642216  |
| 22414 | GO:0046912             | transferase activity, transfer  | 0.33 | 1   | 0.16920474 | 23    | 0.06642216  |
| 25416 | GO:0051119             | sugar transmembrane transp      | 0.33 | 3   | 0.5076142  | 118   | 0.34077454  |
| 9795  | GO:0016740             | transferase activity            | 0.33 | 68  | 11.505922  | 3764  | 10.870131   |
| 3620  | GO:0005057             | receptor signaling protein ac   | 0.33 | 2   | 0.33840948 | 69    | 0.19926646  |
| 21710 | GO:0046148             | pigment biosynthetic process    | 0.33 | 2   | 0.33840948 | 69    | 0.19926646  |
| 8943  | GO:0015672             | monovalent inorganic cation     | 0.33 | 8   | 1.3536379  | 383   | 1.1060733   |
| 3156  | GO:0004497             | monooxygenase activity          | 0.34 | 4   | 0.67681897 | 172   | 0.49672222  |
| 3213  | GO:0004568             | chitinase activity              | 0.34 | 24  | 0.16920474 | 24    | 0.06931008  |
| 6248  | GO:0008843             | endochitinase activity          | 0.34 | 1   | 0.16920474 | 24    | 0.06931008  |
| 9779  | GO:0016717             | oxidoreductase activity, actin  | 0.34 | 24  | 0.16920474 | 24    | 0.06931008  |
| 22440 | GO:0046939             | nucleotide phosphorylation      | 0.34 | 1   | 0.16920474 | 24    | 0.06931008  |
| 31407 | GO:0080030             | methyl indole-3-acetate este    | 0.34 | 1   | 0.16920474 | 24    | 0.06931008  |
| 2821  | GO:0004012(GO:0008557) | phospholipid-translocating A    | 0.34 | 1   | 0.16920474 | 24    | 0.06931008  |
| 8494  | GO:0015075             | ion transmembrane transport     | 0.34 | 16  | 2.7072759  | 827   | 2.3883097   |
| 8675  | GO:0015293             | symporter activity              | 0.34 | 4   | 0.67681897 | 173   | 0.49961013  |
| 3723  | GO:0005215(GO:0005478) | transporter activity            | 0.35 | 34  | 5.752961   | 1844  | 5.325324    |
| 9482  | GO:0016291(GO:0008778) | acyl-CoA thioesterase activit   | 0.35 | 1   | 0.16920474 | 25    | 0.072197996 |
| 31493 | GO:0080118             | brassinosteroid sulfotransfer   | 0.35 | 1   | 0.16920474 | 25    | 0.072197996 |
| 16603 | GO:0034220             | ion transmembrane transport     | 0.35 | 16  | 2.7072759  | 833   | 2.4056373   |
| 9913  | GO:0016881             | acid-amino acid ligase activit  | 0.35 | 8   | 1.3536379  | 391   | 1.1291766   |
| 9812  | GO:0016758             | transferase activity, transfer  | 0.35 | 10  | 1.6920474  | 501   | 1.4468478   |
| 9703  | GO:0016620             | oxidoreductase activity, actin  | 0.35 | 2   | 0.33840948 | 73    | 0.21081814  |
| 18786 | GO:0042440             | pigment metabolic process       | 0.35 | 2   | 0.33840948 | 73    | 0.21081814  |
| 11202 | GO:0019199             | transmembrane receptor prt      | 0.36 | 10  | 1.6920474  | 504   | 1.4555116   |
| 9194  | GO:0015935             | small ribosomal subunit         | 0.36 | 1   | 0.16920474 | 26    | 0.075085916 |
| 9421  | GO:0016208             | AMP binding                     | 0.36 | 1   | 0.16920474 | 26    | 0.075085916 |
| 9658  | GO:0016571             | histone methylation             | 0.36 | 1   | 0.16920474 | 26    | 0.075085916 |
| 126   | GO:0000160             | two-component signal trans      | 0.36 | 1   | 0.16920474 | 26    | 0.075085916 |
| 13082 | GO:0030599             | pectinesterase activity         | 0.36 | 4   | 0.67681897 | 178   | 0.5140497   |
| 12741 | GO:0030170             | pyridoxal phosphate binding     | 0.36 | 3   | 0.5076142  | 126   | 0.3638779   |
| 28643 | GO:0070279             | vitamin B6 binding              | 0.36 | 3   | 0.5076142  | 126   | 0.3638779   |
| 8810  | GO:0015491             | cation:cation antiporter activ  | 0.37 | 2   | 0.33840948 | 75    | 0.21659398  |
| 4612  | GO:0006468             | protein phosphorylation         | 0.37 | 40  | 6.7681894  | 2205  | 6.367863    |
| 3329  | GO:0004708             | MAP kinase kinase activity      | 0.37 | 1   | 0.16920474 | 27    | 0.077973835 |
| 3725  | GO:0005217             | intracellular ligand-gated ion  | 0.37 | 1   | 0.16920474 | 27    | 0.077973835 |
| 8919  | GO:0015645             | fatty acid ligase activity      | 0.37 | 1   | 0.16920474 | 27    | 0.077973835 |
| 9541  | GO:0016413             | O-acetyltransferase activity    | 0.37 | 1   | 0.16920474 | 27    | 0.077973835 |
| 12573 | GO:0022891             | substrate-specific transmem     | 0.37 | 23  | 3.8917089  | 1241  | 3.5839086   |
| 6563  | GO:0009199             | ribonucleoside triphosphate     | 0.37 | 15  | 2.5380712  | 790   | 2.2814567   |
| 3877  | GO:0005516             | calmodulin binding              | 0.38 | 5   | 0.8460237  | 236   | 0.6815491   |
| 6529  | GO:0009165             | nucleotide biosynthetic proce   | 0.38 | 2   | 0.33840948 | 77    | 0.22236982  |
| 4916  | GO:0006818             | hydrogen transport              | 0.38 | 6   | 1.0152284  | 292   | 0.84327257  |
| 9246  | GO:0015992             | proton transport                | 0.38 | 6   | 1.0152284  | 292   | 0.84327257  |
| 3284  | GO:0004650             | polygalacturonase activity      | 0.38 | 1   | 0.16920474 | 28    | 0.080861755 |
| 4374  | GO:0006164             | purine nucleotide biosynthe     | 0.38 | 1   | 0.16920474 | 28    | 0.080861755 |
| 7145  | GO:0009893             | positive regulation of metabo   | 0.38 | 1   | 0.16920474 | 28    | 0.080861755 |
| 7819  | GO:0010604             | positive regulation of macrom   | 0.38 | 1   | 0.16920474 | 28    | 0.080861755 |
| 9827  | GO:0016776             | phosphotransferase activity,    | 0.38 | 1   | 0.16920474 | 28    | 0.080861755 |
| 13634 | GO:0031177             | phosphopantetheine binding      | 0.38 | 1   | 0.16920474 | 28    | 0.080861755 |
| 13755 | GO:0031325             | positive regulation of cellular | 0.38 | 1   | 0.16920474 | 28    | 0.080861755 |
| 6506  | GO:0009141             | nucleoside triphosphate met     | 0.38 | 15  | 2.5380712  | 796   | 2.2987843   |
| 9909  | GO:0016877             | ligase activity, forming carbo  | 0.39 | 2   | 0.33840948 | 78    | 0.22525774  |
| 30865 | GO:0072509             | divalent inorganic cation tran  | 0.39 | 2   | 0.33840948 | 78    | 0.22525774  |
| 25998 | GO:0051716             | cellular response to stimulus   | 0.39 | 21  | 3.5532994  | 1138  | 3.2864528   |
| 25195 | GO:0005096(GO:0051869) | response to stimulus            | 0.39 | 34  | 5.752961   | 1881  | 5.432177    |
| 20510 | GO:0044260(GO:0034960) | cellular macromolecule meta     | 0.39 | 98  | 16.582064  | 5577  | 16.105928   |
| 4427  | GO:0006221             | pyrimidine nucleotide biosyn    | 0.39 | 1   | 0.16920474 | 29    | 0.083749674 |
| 4841  | GO:0006721             | terpenoid metabolic process     | 0.39 | 1   | 0.16920474 | 29    | 0.083749674 |
| 11834 | GO:0019905             | syntaxin binding                | 0.39 | 1   | 0.16920474 | 29    | 0.083749674 |
| 3955  | GO:0005634             | nucleus                         | 0.40 | 26  | 4.399323   | 1433  | 4.138389    |
| 18674 | GO:0042325             | regulation of phosphorylatio    | 0.40 | 2   | 0.33840948 | 81    | 0.23392151  |
| 5916  | GO:0008422(GO:0016983) | beta-glucosidase activity       | 0.40 | 1   | 0.16920474 | 30    | 0.086637594 |
| 6814  | GO:0009526             | plastid envelope                | 0.40 | 1   | 0.16920474 | 30    | 0.086637594 |
| 7188  | GO:0009941             | chloroplast envelope            | 0.40 | 1   | 0.16920474 | 30    | 0.086637594 |
| 8683  | GO:0015301(GO:0015380) | anion:anion antiporter activit  | 0.40 | 1   | 0.16920474 | 30    | 0.086637594 |
| 5712  | GO:0008168(GO:0004480) | methyltransferase activity      | 0.40 | 5   | 0.8460237  | 244   | 0.7046524   |
| 3242  | GO:0004601(GO:0016685) | peroxidase activity             | 0.41 | 3   | 0.5076142  | 135   | 0.38986918  |
| 9754  | GO:0016684             | oxidoreductase activity, actin  | 0.41 | 3   | 0.5076142  | 135   | 0.38986918  |
| 29202 | GO:0070838             | divalent metal ion transport    | 0.41 | 2   | 0.33840948 | 80    | 0.23680943  |
| 4373  | GO:0006163             | purine nucleotide metabolic     | 0.41 | 15  | 2.5380712  | 812   | 2.339215    |
| 30884 | GO:0072528             | pyrimidine-containing compo     | 0.41 | 1   | 0.16920474 | 31    | 0.08952551  |



|       |            |            |                                 |      |    |            |      |             |
|-------|------------|------------|---------------------------------|------|----|------------|------|-------------|
| 6622  | GO:0092591 | GO:009121  | ribonucleotide metabolic pro    | 0.41 | 15 | 2.5380712  | 812  | 2.344991    |
| 3787  | GO:005319  |            | lipid transporter activity      | 0.42 | 2  | 0.33840948 | 83   | 0.23969735  |
| 4912  | GO:006813  | GO:0015458 | potassium ion transport         | 0.42 | 2  | 0.33840948 | 84   | 0.24258527  |
| 30168 | GO:0071804 |            | cellular potassium ion transp   | 0.42 | 2  | 0.33840948 | 84   | 0.24258527  |
| 30169 | GO:0071805 |            | potassium ion transmembran      | 0.42 | 2  | 0.33840948 | 84   | 0.24258527  |
| 30867 | GO:0072511 |            | divalent inorganic cation tran  | 0.42 | 2  | 0.33840948 | 84   | 0.24258527  |
| 3304  | GO:0004672 | GO:0050222 | protein kinase activity         | 0.42 | 24 | 4.0609136  | 1333 | 3.8495972   |
| 3265  | GO:0004630 |            | phospholipase D activity        | 0.42 | 1  | 0.16920474 | 32   | 0.09241343  |
| 4614  | GO:0006470 |            | protein dephosphorylation       | 0.42 | 1  | 0.16920474 | 32   | 0.09241343  |
| 6942  | GO:0009674 |            | potassium:sodium symporte       | 0.42 | 1  | 0.16920474 | 32   | 0.09241343  |
| 12522 | GO:0022820 |            | potassium ion symporter act     | 0.42 | 1  | 0.16920474 | 32   | 0.09241343  |
| 23914 | GO:0048522 | GO:0051242 | positive regulation of cellular | 0.42 | 1  | 0.16920474 | 32   | 0.09241343  |
| 4942  | GO:0006855 |            | drug transmembrane transp       | 0.42 | 3  | 0.5076142  | 139  | 0.40142086  |
| 8607  | GO:0015197 | GO:0015637 | peptide transporter activity    | 0.42 | 3  | 0.5076142  | 139  | 0.40142086  |
| 8608  | GO:0015198 |            | oligopeptide transporter acti   | 0.42 | 3  | 0.5076142  | 139  | 0.40142086  |
| 8642  | GO:0015238 | GO:0015239 | drug transmembrane transp       | 0.42 | 3  | 0.5076142  | 139  | 0.40142086  |
| 9154  | GO:0015893 |            | drug transport                  | 0.42 | 3  | 0.5076142  | 139  | 0.40142086  |
| 18832 | GO:0042493 | GO:0017035 | response to drug                | 0.42 | 3  | 0.5076142  | 139  | 0.40142086  |
| 11222 | GO:0019220 |            | regulation of phosphate met     | 0.43 | 2  | 0.33840948 | 85   | 0.24547319  |
| 25471 | GO:0051174 |            | regulation of phosphorus me     | 0.43 | 2  | 0.33840948 | 85   | 0.24547319  |
| 25626 | GO:0051336 |            | regulation of hydrolase activ   | 0.43 | 4  | 0.67681897 | 196  | 0.5660323   |
| 19684 | GO:0043412 |            | macromolecule modification      | 0.43 | 51 | 8.629441   | 2900 | 8.374968    |
| 5768  | GO:0008238 |            | exopeptidase activity           | 0.43 | 2  | 0.33840948 | 86   | 0.24836111  |
| 4944  | GO:0006857 |            | oligopeptide transport          | 0.43 | 3  | 0.5076142  | 141  | 0.4071967   |
| 8676  | GO:0015234 |            | solute:cation symporter acti    | 0.43 | 3  | 0.5076142  | 141  | 0.4071967   |
| 9099  | GO:0015833 |            | peptide transport               | 0.43 | 3  | 0.5076142  | 141  | 0.4071967   |
| 4493  | GO:0006298 | GO:0006300 | mismatch repair                 | 0.43 | 1  | 0.16920474 | 33   | 0.09530135  |
| 30878 | GO:0072522 |            | purine-containing compound      | 0.43 | 1  | 0.16920474 | 33   | 0.09530135  |
| 18953 | GO:0042623 |            | ATPase activity, coupled        | 0.43 | 10 | 1.6920474  | 537  | 1.550813    |
| 30877 | GO:0072521 |            | purine-containing compound      | 0.44 | 15 | 2.5380712  | 827  | 2.3883097   |
| 8557  | GO:0015144 |            | carbohydrate transmembran       | 0.44 | 3  | 0.5076142  | 143  | 0.41297254  |
| 16602 | GO:0034219 |            | carbohydrate transmembran       | 0.44 | 3  | 0.5076142  | 143  | 0.41297254  |
| 3749  | GO:0005249 |            | voltage-gated potassium cha     | 0.44 | 1  | 0.16920474 | 34   | 0.09818927  |
| 5270  | GO:0007264 |            | small GTPase mediated sig       | 0.44 | 1  | 0.16920474 | 34   | 0.09818927  |
| 6486  | GO:0009119 |            | ribonucleoside metabolic pro    | 0.44 | 1  | 0.16920474 | 34   | 0.09818927  |
| 11208 | GO:0019205 |            | nucleobase, nucleoside, nuc     | 0.44 | 1  | 0.16920474 | 34   | 0.09818927  |
| 11831 | GO:0019902 |            | phosphatase binding             | 0.44 | 1  | 0.16920474 | 34   | 0.09818927  |
| 11832 | GO:0019903 |            | protein phosphatase binding     | 0.44 | 1  | 0.16920474 | 34   | 0.09818927  |
| 12574 | GO:0022892 |            | substrate-specific transporte   | 0.44 | 26 | 4.399323   | 1463 | 4.2250266   |
| 26932 | GO:0055086 |            | nucleobase, nucleoside and      | 0.45 | 17 | 2.8764806  | 944  | 2.7261963   |
| 4405  | GO:0006195 |            | purine nucleotide catabolic p   | 0.45 | 14 | 2.3688664  | 773  | 2.232362    |
| 6508  | GO:0009143 |            | nucleoside triphosphate cata    | 0.45 | 14 | 2.3688664  | 773  | 2.232362    |
| 6509  | GO:0009144 |            | purine nucleoside triphospha    | 0.45 | 14 | 2.3688664  | 773  | 2.232362    |
| 6511  | GO:0009146 |            | purine nucleoside triphospha    | 0.45 | 14 | 2.3688664  | 773  | 2.232362    |
| 6519  | GO:0009154 |            | purine ribonucleotide catabo    | 0.45 | 14 | 2.3688664  | 773  | 2.232362    |
| 6530  | GO:0009166 |            | nucleotide catabolic process    | 0.45 | 14 | 2.3688664  | 773  | 2.232362    |
| 6567  | GO:0009203 |            | ribonucleoside triphosphate     | 0.45 | 14 | 2.3688664  | 773  | 2.232362    |
| 6569  | GO:0009205 |            | purine ribonucleoside triphos   | 0.45 | 14 | 2.3688664  | 773  | 2.232362    |
| 6571  | GO:0009207 |            | purine ribonucleoside triphos   | 0.45 | 14 | 2.3688664  | 773  | 2.232362    |
| 6624  | GO:0009261 |            | ribonucleotide catabolic proc   | 0.45 | 14 | 2.3688664  | 773  | 2.232362    |
| 17034 | GO:0034655 |            | nucleobase, nucleoside, nuc     | 0.45 | 14 | 2.3688664  | 773  | 2.232362    |
| 17035 | GO:0034656 |            | nucleobase, nucleoside and      | 0.45 | 14 | 2.3688664  | 773  | 2.232362    |
| 22209 | GO:0046700 |            | heterocycle catabolic proces    | 0.45 | 14 | 2.3688664  | 773  | 2.232362    |
| 30879 | GO:0072523 |            | purine-containing compound      | 0.45 | 14 | 2.3688664  | 773  | 2.232362    |
| 14380 | GO:0031967 |            | organelle envelope              | 0.45 | 4  | 0.67681897 | 201  | 0.5804719   |
| 4426  | GO:0006220 |            | pyrimidine nucleotide metab     | 0.45 | 1  | 0.16920474 | 35   | 0.10107719  |
| 9480  | GO:0016289 |            | CoA hydrolase activity          | 0.45 | 1  | 0.16920474 | 35   | 0.10107719  |
| 12806 | GO:0030247 |            | polysaccharide binding          | 0.45 | 1  | 0.16920474 | 35   | 0.10107719  |
| 1169  | GO:0001871 |            | pattern binding                 | 0.45 | 1  | 0.16920474 | 35   | 0.10107719  |
| 28365 | GO:0065008 |            | regulation of biological quali  | 0.45 | 6  | 1.0152284  | 316  | 0.9125827   |
| 20520 | GO:0044270 |            | cellular nitrogen compound c    | 0.46 | 14 | 2.3688664  | 777  | 2.2439137   |
| 6071  | GO:0008643 | GO:0006861 | carbohydrate transport          | 0.46 | 3  | 0.5076142  | 147  | 0.42452422  |
| 9796  | GO:0016741 |            | transferase activity, transferr | 0.46 | 5  | 0.8460237  | 261  | 0.7537471   |
| 6794  | GO:0009505 |            | plant-type cell wall            | 0.46 | 1  | 0.16920474 | 36   | 0.10396511  |
| 12626 | GO:0030029 |            | actin filament-based process    | 0.46 | 1  | 0.16920474 | 36   | 0.10396511  |
| 12633 | GO:0030036 |            | actin cytoskeleton organizati   | 0.46 | 1  | 0.16920474 | 36   | 0.10396511  |
| 20649 | GO:0044455 |            | mitochondrial membrane pa       | 0.46 | 1  | 0.16920474 | 36   | 0.10396511  |
| 9579  | GO:0016462 |            | pyrophosphatase activity        | 0.46 | 17 | 2.8764806  | 954  | 2.7550755   |
| 14387 | GO:0031975 |            | envelope                        | 0.46 | 4  | 0.67681897 | 205  | 0.59202355  |
| 9859  | GO:0016818 |            | hydrolase activity, acting on   | 0.47 | 17 | 2.8764806  | 956  | 2.7608514   |
| 16785 | GO:0034404 |            | nucleobase, nucleoside and      | 0.47 | 2  | 0.33840948 | 92   | 0.26568863  |
| 17033 | GO:0034654 |            | nucleobase, nucleoside, nuc     | 0.47 | 2  | 0.33840948 | 92   | 0.26568863  |
| 11426 | GO:0019438 |            | aromatic compound biosynt       | 0.47 | 3  | 0.5076142  | 149  | 0.43030006  |
| 3758  | GO:0005267 |            | potassium channel activ         | 0.47 | 1  | 0.16920474 | 37   | 0.10685303  |
| 8934  | GO:0015662 |            | ATPase activity, coupled to     | 0.47 | 1  | 0.16920474 | 37   | 0.10685303  |
| 8980  | GO:0015711 |            | organic anion transport         | 0.47 | 1  | 0.16920474 | 37   | 0.10685303  |
| 9858  | GO:0016817 |            | hydrolase activity, acting on   | 0.47 | 17 | 2.8764806  | 959  | 2.769515    |
| 5018  | GO:0006950 |            | response to stress              | 0.47 | 11 | 1.8612521  | 611  | 1.764519    |
| 9811  | GO:0016757 | GO:0016932 | transferase activity, transferr | 0.48 | 13 | 2.1996615  | 729  | 2.1052935   |
| 4029  | GO:0005740 |            | mitochondrial envelope          | 0.48 | 3  | 0.5076142  | 151  | 0.4360759   |
| 5066  | GO:0007010 |            | cytoskeleton organization       | 0.48 | 1  | 0.16920474 | 38   | 0.10974095  |
| 6749  | GO:0009414 |            | response to water deprivatio    | 0.48 | 1  | 0.16920474 | 38   | 0.10974095  |
| 8501  | GO:0015085 |            | calcium ion transmembrane       | 0.48 | 1  | 0.16920474 | 38   | 0.10974095  |
| 8588  | GO:0015175 |            | neutral amino acid transmem     | 0.48 | 1  | 0.16920474 | 38   | 0.10974095  |
| 9073  | GO:0015804 |            | neutral amino acid transport    | 0.48 | 1  | 0.16920474 | 38   | 0.10974095  |
| 12538 | GO:0022843 |            | voltage-gated cation channe     | 0.48 | 1  | 0.16920474 | 38   | 0.10974095  |
| 117   | GO:0000149 |            | SNARE binding                   | 0.48 | 1  | 0.16920474 | 38   | 0.10974095  |
| 6515  | GO:0009150 |            | purine ribonucleotide metab     | 0.48 | 14 | 2.3688664  | 791  | 2.2843447   |
| 6623  | GO:0009260 |            | ribonucleotide biosynthetic p   | 0.49 | 1  | 0.16920474 | 39   | 0.11262887  |
| 30883 | GO:0072527 |            | pyrimidine-containing compo     | 0.49 | 1  | 0.16920474 | 39   | 0.11262887  |
| 6424  | GO:0009055 | GO:0009053 | electron carrier activity       | 0.49 | 3  | 0.5076142  | 154  | 0.44473964  |
| 8517  | GO:0015103 |            | inorganic anion transmembran    | 0.49 | 3  | 0.5076142  | 154  | 0.44473964  |
| 4867  | GO:0006753 |            | nucleoside phosphate metal      | 0.49 | 16 | 2.7072759  | 914  | 2.6395588   |
| 6484  | GO:0009117 |            | nucleotide metabolic proces     | 0.49 | 16 | 2.7072759  | 914  | 2.6395588   |
| 8495  | GO:0015077 |            | monovalent inorganic cation     | 0.50 | 4  | 0.67681897 | 214  | 0.6180149   |
| 23910 | GO:0048518 | GO:0043119 | positive regulation of biologic | 0.50 | 1  | 0.16920474 | 40   | 0.1155168   |
| 12572 | GO:0022890 | GO:0015082 | inorganic cation transmembr     | 0.50 | 6  | 1.0152284  | 332  | 0.9587894   |
| 22007 | GO:0046483 |            | heterocycle metabolic proces    | 0.50 | 19 | 3.21489    | 1094 | 3.1593843   |
| 20627 | GO:0044433 |            | cytoplasmic vesicle part        | 0.51 | 1  | 0.16920474 | 41   | 0.118404716 |
| 3716  | GO:0005198 |            | structural molecule activity    | 0.51 | 7  | 1.1844332  | 393  | 1.1349525   |
| 17020 | GO:0034641 |            | cellular nitrogen compound r    | 0.51 | 63 | 10.659899  | 3678 | 10.621769   |
| 3490  | GO:0004888 | GO:0004926 | transmembrane receptor ac       | 0.51 | 10 | 1.6920474  | 571  | 1.6490022   |
| 4874  | GO:0006767 |            | water-soluble vitamin metab     | 0.51 | 1  | 0.16920474 | 42   | 0.121292636 |
| 8461  | GO:0015020 | GO:0003981 | glucuronosyltransferase acti    | 0.51 | 1  | 0.16920474 | 42   | 0.121292636 |
| 12659 | GO:0030076 |            | light-harvesting complex        | 0.51 | 1  | 0.16920474 | 42   | 0.121292636 |
| 13884 | GO:0031461 |            | cullin-RING ubiquitin ligase c  | 0.51 | 1  | 0.16920474 | 42   | 0.121292636 |
| 18713 | GO:0042364 |            | water-soluble vitamin biosyn    | 0.51 | 1  | 0.16920474 | 42   | 0.121292636 |
| 8496  | GO:0015078 |            | hydrogen ion transmembran       | 0.52 | 3  | 0.5076142  | 160  | 0.4620672   |
| 9911  | GO:0016879 |            | ligase activity, forming carbo  | 0.52 | 8  | 1.3536379  | 456  | 1.3168914   |
| 9870  | GO:0016830 |            | carbon-carbon lyase activity    | 0.52 | 3  | 0.5076142  | 161  | 0.4649551   |
| 3900  | GO:0005548 | GO:0008497 | phospholipid transporter acti   | 0.52 | 1  | 0.16920474 | 43   | 0.124180555 |
| 8589  | GO:0015179 |            | L-amino acid transmembran       | 0.52 | 1  | 0.16920474 | 43   | 0.124180555 |
| 9076  | GO:0015807 |            | L-amino acid transport          | 0.52 | 1  | 0.16920474 | 43   | 0.124180555 |
| 9174  | GO:0015914 |            | phospholipid transport          | 0.52 | 1  | 0.16920474 | 43   | 0.124180555 |
| 13833 | GO:0031410 |            | cytoplasmic vesicle             | 0.52 | 1  | 0.16920474 | 43   | 0.124180555 |
| 14393 | GO:0031982 |            | vesicle                         | 0.52 | 1  | 0.16920474 | 43   | 0.124180555 |
| 4873  | GO:0006766 |            | vitamin metabolic process       | 0.53 | 1  | 0.16920474 | 44   | 0.12706847  |
| 4914  | GO:0006816 |            | calcium ion transport           | 0.53 | 1  | 0.16920474 | 44   | 0.12706847  |
| 5797  | GO:0008276 |            | protein methyltransferase ac    | 0.53 | 1  | 0.16920474 | 44   | 0.12706847  |
| 6477  | GO:0009110 |            | vitamin biosynthetic process    | 0.53 | 1  | 0.16920474 | 44   | 0.12706847  |
| 9186  | GO:0015926 |            | glucosidase activity            | 0.53 | 1  | 0.16920474 | 44   | 0.12706847  |
| 9753  | GO:0016682 |            | oxidoreductase activity, actin  | 0.53 | 1  | 0.16920474 | 44   | 0.12706847  |



|       |                                  |                                                             |      |     |            |       |            |
|-------|----------------------------------|-------------------------------------------------------------|------|-----|------------|-------|------------|
| 20522 | GO:0044272                       | sulfur compound biosynthetic process                        | 0.53 | 1   | 0.16920474 | 44    | 0.12706847 |
| 28952 | GO:0070588                       | calcium ion transmembrane transport                         | 0.53 | 1   | 0.16920474 | 44    | 0.12706847 |
| 9709  | GO:0016627                       | oxidoreductase activity, acting on NADPH                    | 0.53 | 2   | 0.33840948 | 104   | 0.30034366 |
| 5055  | GO:0006996                       | organelle organization                                      | 0.53 | 3   | 0.5076142  | 164   | 0.47361887 |
| 20623 | GO:0044429                       | mitochondrial part                                          | 0.54 | 3   | 0.5076142  | 165   | 0.47650677 |
| 14667 | GO:0032259                       | methylation                                                 | 0.54 | 5   | 0.8460237  | 285   | 0.82305672 |
| 5692  | GO:0008134                       | transcription factor binding                                | 0.54 | 1   | 0.16920474 | 45    | 0.1299564  |
| 8787  | GO:0015450                       | P-P-bond-hydrolysis-driven transport                        | 0.54 | 1   | 0.16920474 | 45    | 0.1299564  |
| 11780 | GO:0019829                       | cation-transporting ATPase activity                         | 0.54 | 1   | 0.16920474 | 45    | 0.1299564  |
| 4476  | GO:0006278                       | RNA-dependent DNA replication                               | 0.54 | 3   | 0.5076142  | 166   | 0.4793947  |
| 3942  | GO:0005618                       | cell wall                                                   | 0.55 | 2   | 0.33840948 | 107   | 0.30900744 |
| 4906  | GO:0006807                       | nitrogen compound metabolic process                         | 0.55 | 63  | 10.659899  | 3725  | 10.757502  |
| 8497  | GO:0015079 GO:0022817            | potassium ion transmembrane transport                       | 0.55 | 1   | 0.16920474 | 47    | 0.13573223 |
| 4188  | GO:0005938                       | cell cortex                                                 | 0.56 | 1   | 0.16920474 | 48    | 0.13862015 |
| 14591 | GO:0032183                       | SUMO binding                                                | 0.56 | 1   | 0.16920474 | 48    | 0.13862015 |
| 20642 | GO:0044448                       | cell cortex part                                            | 0.56 | 1   | 0.16920474 | 48    | 0.13862015 |
| 113   | GO:0000145                       | exocyst                                                     | 0.56 | 1   | 0.16920474 | 48    | 0.13862015 |
| 20498 | GO:0044248                       | cellular catabolic process                                  | 0.56 | 15  | 2.5380712  | 894   | 2.5818002  |
| 12868 | GO:0030312                       | external encapsulating structure                            | 0.57 | 2   | 0.33840948 | 111   | 0.3205591  |
| 9906  | GO:0016874                       | ligase activity                                             | 0.57 | 10  | 1.6920474  | 597   | 1.7240882  |
| 3756  | GO:0005261 GO:0015281 GO:0005261 | cation channel activity                                     | 0.57 | 1   | 0.16920474 | 49    | 0.14150807 |
| 6750  | GO:0009415                       | response to water                                           | 0.57 | 1   | 0.16920474 | 49    | 0.14150807 |
| 8909  | GO:0015630                       | microtubule cytoskeleton                                    | 0.57 | 1   | 0.16920474 | 49    | 0.14150807 |
| 9493  | GO:0016310                       | phosphorylation                                             | 0.57 | 42  | 7.106599   | 2504  | 7.2313514  |
| 4622  | GO:0006479                       | protein methylation                                         | 0.58 | 1   | 0.16920474 | 50    | 0.14439599 |
| 5750  | GO:0008213                       | protein alkylation                                          | 0.58 | 1   | 0.16920474 | 50    | 0.14439599 |
| 20517 | GO:0044267                       | cellular protein metabolic process                          | 0.58 | 54  | 9.137055   | 3225  | 9.313541   |
| 8967  | GO:0015698                       | inorganic anion transport                                   | 0.58 | 3   | 0.5076142  | 176   | 0.5082739  |
| 9871  | GO:0016831                       | carboxyl-lyase activity                                     | 0.59 | 2   | 0.33840948 | 115   | 0.3321108  |
| 6166  | GO:0008757                       | S-adenosylmethionine-dependent methyltransferase activity   | 0.60 | 3   | 0.5076142  | 180   | 0.5198256  |
| 20532 | GO:0044282                       | small molecule catabolic process                            | 0.60 | 14  | 2.3688664  | 854   | 2.4662836  |
| 9750  | GO:0016679                       | oxidoreductase activity, acting on NADPH                    | 0.60 | 1   | 0.16920474 | 53    | 0.15305975 |
| 9836  | GO:0016787                       | hydrolase activity, acting on NADPH                         | 0.60 | 62  | 10.490694  | 3723  | 10.751725  |
| 5981  | GO:0008509                       | anion transmembrane transport                               | 0.60 | 4   | 0.67681897 | 245   | 0.70754033 |
| 17918 | GO:0035556 GO:0007242 GO:0007242 | intracellular signal transduction                           | 0.61 | 1   | 0.16920474 | 54    | 0.15594767 |
| 4917  | GO:0006820 GO:0006822            | anion transport                                             | 0.61 | 4   | 0.67681897 | 247   | 0.7133162  |
| 20505 | GO:0044255                       | cellular lipid metabolic process                            | 0.61 | 3   | 0.5076142  | 184   | 0.53137726 |
| 4894  | GO:0006790                       | sulfur compound metabolic process                           | 0.61 | 1   | 0.16920474 | 55    | 0.15883559 |
| 4844  | GO:0006725                       | cellular aromatic compound metabolic process                | 0.61 | 3   | 0.5076142  | 185   | 0.53426516 |
| 3200  | GO:0004553 GO:0016800            | hydrolase activity, hydrolyzing NADPH                       | 0.62 | 5   | 0.8460237  | 312   | 0.90103096 |
| 12532 | GO:0022836                       | gated channel activity                                      | 0.62 | 2   | 0.33840948 | 122   | 0.3523262  |
| 4224  | GO:0005984                       | disaccharide metabolic process                              | 0.62 | 1   | 0.16920474 | 56    | 0.16172351 |
| 9369  | GO:0016137                       | glycoside metabolic process                                 | 0.62 | 1   | 0.16920474 | 56    | 0.16172351 |
| 7229  | GO:0009987 GO:0008151 GO:0008151 | cellular process                                            | 0.62 | 178 | 30.118443  | 10601 | 30.614838  |
| 5964  | GO:0008483                       | transaminase activity                                       | 0.63 | 1   | 0.16920474 | 57    | 0.16461143 |
| 9813  | GO:0016759                       | cellulose synthase activity                                 | 0.63 | 1   | 0.16920474 | 57    | 0.16461143 |
| 9821  | GO:0016769                       | transferase activity, transferring NADPH                    | 0.63 | 1   | 0.16920474 | 57    | 0.16461143 |
| 3323  | GO:0004702                       | receptor signaling protein serine/threonine kinase activity | 0.63 | 1   | 0.16920474 | 58    | 0.16749935 |
| 5819  | GO:0008299 GO:0009241            | isoprenoid biosynthetic process                             | 0.63 | 1   | 0.16920474 | 58    | 0.16749935 |
| 6665  | GO:0009311                       | oligosaccharide metabolic process                           | 0.63 | 1   | 0.16920474 | 58    | 0.16749935 |
| 2831  | GO:0004022                       | alcohol dehydrogenase (NAD-dependent) activity              | 0.64 | 1   | 0.16920474 | 59    | 0.17038727 |
| 2626  | GO:0003674 GO:0005554            | molecular function                                          | 0.64 | 413 | 69.88155   | 24394 | 70.447914  |
| 10058 | GO:0017111                       | nucleoside-triphosphatase activity                          | 0.64 | 14  | 2.3688664  | 839   | 2.5355935  |
| 3306  | GO:0004674 GO:0004692 GO:0004692 | protein serine/threonine kinase activity                    | 0.64 | 17  | 2.8764806  | 1062  | 3.0669708  |
| 30206 | GO:0071842                       | cellular component organization                             | 0.64 | 3   | 0.5076142  | 193   | 0.5573685  |
| 5652  | GO:0008081 GO:0004434 GO:0004434 | phosphoric diester hydrolase activity                       | 0.64 | 1   | 0.16920474 | 60    | 0.17327519 |
| 9824  | GO:0016773                       | phosphotransferase activity, acting on NADPH                | 0.65 | 24  | 4.0609136  | 1493  | 4.311664   |
| 2818  | GO:0004003                       | ATP-dependent DNA helicase activity                         | 0.65 | 1   | 0.16920474 | 61    | 0.1761631  |
| 4849  | GO:0006730 GO:0019753 GO:0019753 | one-carbon metabolic process                                | 0.65 | 5   | 0.8460237  | 325   | 0.93857396 |
| 9488  | GO:0016301                       | kinase activity                                             | 0.65 | 28  | 4.737733   | 1740  | 5.0249805  |
| 22479 | GO:0046983                       | protein dimerization activity                               | 0.66 | 8   | 1.3536379  | 517   | 1.4930545  |
| 3340  | GO:0004721                       | phosphoprotein phosphatase activity                         | 0.66 | 3   | 0.5076142  | 199   | 0.57469606 |
| 10244 | GO:0018130                       | heterocycle biosynthetic process                            | 0.66 | 3   | 0.5076142  | 199   | 0.57469606 |
| 19126 | GO:0042803                       | protein homodimerization activity                           | 0.66 | 4   | 0.67681897 | 265   | 0.7652988  |
| 22416 | GO:0046915                       | transition metal ion transporter activity                   | 0.67 | 1   | 0.16920474 | 64    | 0.18482687 |
| 15436 | GO:0033036                       | macromolecule localization                                  | 0.67 | 6   | 1.0152284  | 397   | 1.1465042  |
| 9838  | GO:0016790                       | thiolester hydrolase activity                               | 0.67 | 1   | 0.16920474 | 65    | 0.18771479 |
| 5791  | GO:0008270                       | zinc ion binding                                            | 0.67 | 30  | 5.0761423  | 1880  | 5.4292893  |
| 9765  | GO:0016702                       | oxidoreductase activity, acting on NADPH                    | 0.68 | 1   | 0.16920474 | 66    | 0.1906027  |
| 2629  | GO:0003678 GO:0003679            | DNA helicase activity                                       | 0.68 | 1   | 0.16920474 | 67    | 0.19349062 |
| 4897  | GO:0006793                       | phosphorus metabolic process                                | 0.69 | 47  | 7.952623   | 2925  | 8.4471655  |
| 4900  | GO:0006796                       | phosphate metabolic process                                 | 0.69 | 47  | 7.952623   | 2925  | 8.4471655  |
| 18955 | GO:0042625                       | ATPase activity, coupled to transport                       | 0.69 | 1   | 0.16920474 | 68    | 0.19637854 |
| 32    | GO:0000041                       | transition metal ion transport                              | 0.69 | 1   | 0.16920474 | 68    | 0.19637854 |
| 3724  | GO:0005216                       | ion channel activity                                        | 0.69 | 2   | 0.33840948 | 140   | 0.40430877 |
| 6046  | GO:0008610                       | lipid biosynthetic process                                  | 0.70 | 2   | 0.33840948 | 141   | 0.4071967  |
| 5726  | GO:0008187                       | poly-pyrimidine tract binding                               | 0.70 | 1   | 0.16920474 | 70    | 0.20215438 |
| 5788  | GO:0008266                       | poly(U) RNA binding                                         | 0.70 | 1   | 0.16920474 | 70    | 0.20215438 |
| 5838  | GO:0008320                       | protein transmembrane transport                             | 0.70 | 1   | 0.16920474 | 70    | 0.20215438 |
| 12568 | GO:0022884                       | macromolecule transmembrane transport                       | 0.70 | 1   | 0.16920474 | 70    | 0.20215438 |
| 9771  | GO:0016709                       | oxidoreductase activity, acting on NADPH                    | 0.71 | 1   | 0.16920474 | 71    | 0.2050423  |
| 3744  | GO:0005244                       | voltage-gated ion channel activity                          | 0.71 | 1   | 0.16920474 | 72    | 0.20793022 |
| 9764  | GO:0016701                       | oxidoreductase activity, acting on NADPH                    | 0.71 | 1   | 0.16920474 | 72    | 0.20793022 |
| 12528 | GO:0022832                       | voltage-gated channel activity                              | 0.71 | 1   | 0.16920474 | 72    | 0.20793022 |
| 15280 | GO:0032879                       | regulation of localization                                  | 0.71 | 1   | 0.16920474 | 72    | 0.20793022 |
| 17141 | GO:0034762                       | regulation of transmembrane transport                       | 0.71 | 1   | 0.16920474 | 72    | 0.20793022 |
| 17144 | GO:0034765                       | regulation of ion transmembrane transport                   | 0.71 | 1   | 0.16920474 | 72    | 0.20793022 |
| 19568 | GO:0043269                       | regulation of ion transport                                 | 0.71 | 1   | 0.16920474 | 72    | 0.20793022 |
| 25348 | GO:0051049                       | regulation of transport                                     | 0.71 | 1   | 0.16920474 | 72    | 0.20793022 |
| 3311  | GO:0004683 GO:0004684 GO:0004684 | calmodulin-dependent protein kinase activity                | 0.72 | 1   | 0.16920474 | 74    | 0.21370606 |
| 20628 | GO:0044434                       | chloroplast part                                            | 0.72 | 1   | 0.16920474 | 74    | 0.21370606 |
| 20629 | GO:0044435                       | plastid part                                                | 0.72 | 1   | 0.16920474 | 74    | 0.21370606 |
| 4028  | GO:0005739                       | mitochondrion                                               | 0.72 | 3   | 0.5076142  | 219   | 0.63245445 |
| 25510 | GO:0051213                       | dioxygenase activity                                        | 0.73 | 1   | 0.16920474 | 75    | 0.21659398 |
| 5019  | GO:0006952 GO:0022171 GO:0022171 | defense response                                            | 0.73 | 3   | 0.5076142  | 221   | 0.63823026 |
| 5663  | GO:0008094 GO:0004011            | DNA-dependent ATPase activity                               | 0.73 | 1   | 0.16920474 | 76    | 0.2194819  |
| 5604  | GO:0008017                       | microtubule binding                                         | 0.73 | 1   | 0.16920474 | 77    | 0.22236982 |
| 13656 | GO:0031224                       | intrinsic to membrane                                       | 0.74 | 18  | 3.0456853  | 1193  | 3.4452884  |
| 4460  | GO:0006260 GO:0055133            | DNA replication                                             | 0.74 | 3   | 0.5076142  | 224   | 0.64689404 |
| 13547 | GO:0031090                       | organelle membrane                                          | 0.74 | 3   | 0.5076142  | 224   | 0.64689404 |
| 9697  | GO:0016614                       | oxidoreductase activity, acting on NADPH                    | 0.74 | 4   | 0.67681897 | 293   | 0.84616053 |
| 5681  | GO:0008116                       | prostaglandin-H synthase activity                           | 0.74 | 1   | 0.16920474 | 78    | 0.22525774 |
| 9800  | GO:0016746                       | transferase activity, transferring NADPH                    | 0.75 | 7   | 1.1844332  | 498   | 1.438184   |
| 9655  | GO:0016568                       | chromatin modification                                      | 0.75 | 1   | 0.16920474 | 80    | 0.2310336  |
| 9656  | GO:0016569                       | covalent chromatin modification                             | 0.75 | 1   | 0.16920474 | 80    | 0.2310336  |
| 9657  | GO:0016570                       | histone modification                                        | 0.75 | 1   | 0.16920474 | 80    | 0.2310336  |
| 9875  | GO:0016836                       | hydro-lyase activity                                        | 0.75 | 1   | 0.16920474 | 80    | 0.2310336  |
| 3307  | GO:0004675                       | transmembrane receptor protein tyrosine kinase activity     | 0.75 | 5   | 0.8460237  | 367   | 1.0598665  |
| 19526 | GO:0043227                       | membrane-bounded organelle                                  | 0.75 | 33  | 5.5837564  | 2142  | 6.185924   |
| 19530 | GO:0043231                       | intracellular membrane-bounded organelle                    | 0.75 | 33  | 5.5837564  | 2142  | 6.185924   |
| 6991  | GO:0009725                       | response to hormone stimulus                                | 0.76 | 1   | 0.16920474 | 82    | 0.23680943 |
| 20487 | GO:0044237                       | cellular metabolic process                                  | 0.76 | 133 | 22.50423   | 8185  | 23.637625  |
| 4643  | GO:0006511                       | ubiquitin-dependent protein catabolic process               | 0.76 | 1   | 0.16920474 | 84    | 0.24258527 |
| 11864 | GO:0019941                       | modification-dependent protein catabolic process            | 0.76 | 1   | 0.16920474 | 84    | 0.24258527 |
| 19898 | GO:0043632                       | modification-dependent macromolecule catabolic process      | 0.76 | 1   | 0.16920474 | 84    | 0.24258527 |
| 20507 | GO:0044257                       | cellular protein catabolic process                          | 0.76 | 1   | 0.16920474 | 84    | 0.24258527 |
| 25887 | GO:0051603                       | proteolysis involved in cellular catabolic process          | 0.76 | 1   | 0.16920474 | 84    | 0.24258527 |
| 9837  | GO:0016788                       | hydrolase activity, acting on NADPH                         | 0.77 | 23  | 3.8917089  | 1534  | 4.430069   |
| 2628  | GO:0003677                       | DNA binding                                                 | 0.77 | 18  | 3.0456853  | 1224  | 3.534814   |
| 6985  | GO:0009719                       | response to endogenous stimulus                             | 0.77 | 1   | 0.16920474 | 86    | 0.24836111 |
| 12734 | GO:0030163                       | protein catabolic process                                   | 0.77 | 1   | 0.16920474 | 86    | 0.24836111 |
| 19952 | GO:0043687                       | post-translational protein modification                     | 0.77 | 1   | 0.16920474 | 86    | 0.24836111 |

|       |                       |                                 |      |     |            |       |            |
|-------|-----------------------|---------------------------------|------|-----|------------|-------|------------|
| 20515 | GO:0044265 GO:0034962 | cellular macromolecule cata     | 0.77 | 1   | 0.16920474 | 86    | 0.24836111 |
| 9267  | GO:0016021            | integral to membrane            | 0.78 | 16  | 2.7072759  | 1103  | 3.1853757  |
| 20624 | GO:0044430            | cytoskeletal part               | 0.78 | 1   | 0.16920474 | 88    | 0.25413695 |
| 119   | GO:0000151            | ubiquitin ligase complex        | 0.78 | 1   | 0.16920474 | 88    | 0.25413695 |
| 14590 | GO:0032182            | small conjugating protein bin   | 0.79 | 1   | 0.16920474 | 90    | 0.2599128  |
| 2982  | GO:0004197            | cysteine-type endopeptidase     | 0.79 | 1   | 0.16920474 | 90    | 0.2599128  |
| 3644  | GO:0005102            | receptor binding                | 0.79 | 1   | 0.16920474 | 91    | 0.2628007  |
| 3341  | GO:0004722 GO:0001581 | protein serine/threonine phos   | 0.79 | 2   | 0.33840948 | 171   | 0.4938343  |
| 9801  | GO:0016747            | transferase activity, transfer  | 0.79 | 6   | 1.0152284  | 456   | 1.3168914  |
| 2660  | GO:0003735 GO:0003736 | structural constituent of ribos | 0.79 | 3   | 0.5076142  | 246   | 0.7104283  |
| 6425  | GO:0009056            | catabolic process               | 0.79 | 15  | 2.5380712  | 1051  | 3.0352037  |
| 4067  | GO:0005783            | endoplasmic reticulum           | 0.80 | 2   | 0.33840948 | 174   | 0.50249803 |
| 18582 | GO:0042221            | response to chemical stimul     | 0.81 | 4   | 0.67681897 | 328   | 0.94723773 |
| 9845  | GO:0016798            | hydrolase activity, acting on   | 0.82 | 5   | 0.8460237  | 401   | 1.1580559  |
| 5809  | GO:0008289            | lipid binding                   | 0.82 | 3   | 0.5076142  | 258   | 0.74508333 |
| 30306 | GO:0071944            | cell periphery                  | 0.82 | 3   | 0.5076142  | 259   | 0.74797124 |
| 7271  | GO:0010033            | response to organic substan     | 0.82 | 1   | 0.16920474 | 100   | 0.28879198 |
| 5280  | GO:0007275            | multicellular organismal deve   | 0.82 | 1   | 0.16920474 | 101   | 0.2916799  |
| 9285  | GO:0016043            | cellular component organiza     | 0.82 | 3   | 0.5076142  | 261   | 0.7537471  |
| 9486  | GO:0016298            | lipase activity                 | 0.83 | 2   | 0.33840948 | 185   | 0.53426516 |
| 9699  | GO:0016616            | oxidoreductase activity, acti   | 0.83 | 3   | 0.5076142  | 266   | 0.7681867  |
| 14909 | GO:0032501 GO:0050874 | multicellular organismal proc   | 0.84 | 1   | 0.16920474 | 105   | 0.3032316  |
| 9823  | GO:0016772            | transferase activity, transfer  | 0.84 | 28  | 4.737733   | 1932  | 5.579461   |
| 6426  | GO:0009057 GO:0043285 | macromolecule catabolic pr      | 0.84 | 1   | 0.16920474 | 106   | 0.3061195  |
| 9869  | GO:0016829            | lyase activity                  | 0.84 | 6   | 1.0152284  | 488   | 1.4093049  |
| 8910  | GO:0015631            | tubulin binding                 | 0.84 | 1   | 0.16920474 | 107   | 0.30900744 |
| 9494  | GO:0016311            | dephosphorylation               | 0.85 | 5   | 0.8460237  | 425   | 1.227366   |
| 4512  | GO:0006325            | chromatin organization          | 0.86 | 1   | 0.16920474 | 112   | 0.32344702 |
| 5070  | GO:0007017            | microtubule-based process       | 0.86 | 1   | 0.16920474 | 112   | 0.32344702 |
| 5071  | GO:0007018            | microtubule-based moveme        | 0.86 | 1   | 0.16920474 | 112   | 0.32344702 |
| 25568 | GO:0051276 GO:0007001 | chromosome organization         | 0.86 | 1   | 0.16920474 | 112   | 0.32344702 |
| 19686 | GO:0043414            | macromolecule methylation       | 0.86 | 1   | 0.16920474 | 113   | 0.32633495 |
| 22478 | GO:0046982            | protein heterodimerization a    | 0.86 | 1   | 0.16920474 | 114   | 0.32922286 |
| 6020  | GO:0008565 GO:0015463 | protein transporter activity    | 0.86 | 1   | 0.16920474 | 115   | 0.3321108  |
| 9535  | GO:0016407            | acetyltransferase activity      | 0.86 | 1   | 0.16920474 | 115   | 0.3321108  |
| 30205 | GO:0071841            | cellular component organiza     | 0.87 | 3   | 0.5076142  | 285   | 0.8230572  |
| 14910 | GO:0032502            | developmental process           | 0.88 | 1   | 0.16920474 | 121   | 0.3494383  |
| 18912 | GO:0042578            | phosphoric ester hydrolase a    | 0.88 | 5   | 0.8460237  | 444   | 1.2822365  |
| 4755  | GO:0006629            | lipid metabolic process         | 0.88 | 7   | 1.1844332  | 590   | 1.7038727  |
| 3260  | GO:0004620            | phospholipase activity          | 0.88 | 1   | 0.16920474 | 123   | 0.35521415 |
| 4121  | GO:0005856            | cytoskeleton                    | 0.89 | 1   | 0.16920474 | 126   | 0.3638779  |
| 13018 | GO:0030529            | ribonucleoprotein complex       | 0.89 | 9   | 1.5228426  | 741   | 2.1399486  |
| 12533 | GO:0022838            | substrate-specific channel ac   | 0.89 | 2   | 0.33840948 | 221   | 0.63823026 |
| 9839  | GO:0016791 GO:0016302 | phosphatase activity            | 0.89 | 4   | 0.67681897 | 383   | 1.1060733  |
| 4109  | GO:0005840 GO:0032729 | ribosome                        | 0.90 | 8   | 1.3536379  | 682   | 1.9695613  |
| 8660  | GO:0015267 GO:0015249 | channel activity                | 0.90 | 2   | 0.33840948 | 226   | 0.6526699  |
| 12515 | GO:0022803            | passive transmembrane tran      | 0.90 | 2   | 0.33840948 | 226   | 0.6526699  |
| 6796  | GO:0009507            | chloroplast                     | 0.90 | 2   | 0.33840948 | 229   | 0.6613336  |
| 20531 | GO:0044281            | small molecule metabolic pr     | 0.91 | 24  | 4.0609136  | 1788  | 5.1636004  |
| 19125 | GO:0042802            | identical protein binding       | 0.91 | 8   | 1.3536379  | 697   | 2.01288    |
| 3873  | GO:0005507            | copper ion binding              | 0.92 | 1   | 0.16920474 | 146   | 0.42163628 |
| 9895  | GO:0016860            | intramolecular oxidoreductas    | 0.92 | 1   | 0.16920474 | 146   | 0.42163628 |
| 5909  | GO:0008415            | acyltransferase activity        | 0.92 | 3   | 0.5076142  | 330   | 0.95301354 |
| 4478  | GO:0006281            | DNA repair                      | 0.92 | 1   | 0.16920474 | 149   | 0.43030006 |
| 5037  | GO:0006974 GO:0034984 | response to DNA damage s        | 0.92 | 1   | 0.16920474 | 149   | 0.43030006 |
| 6824  | GO:0009536            | plastid                         | 0.93 | 2   | 0.33840948 | 247   | 0.7133162  |
| 19525 | GO:0043226            | organelle                       | 0.93 | 42  | 7.106599   | 3013  | 8.701303   |
| 19528 | GO:0043229            | intracellular organelle         | 0.93 | 42  | 7.106599   | 3013  | 8.701303   |
| 19831 | GO:0043565            | sequence-specific DNA bind      | 0.94 | 1   | 0.16920474 | 159   | 0.45917925 |
| 20533 | GO:0044283            | small molecule biosynthetic     | 0.94 | 3   | 0.5076142  | 347   | 1.0021082  |
| 5764  | GO:0008234 GO:0004220 | cysteine-type peptidase acti    | 0.94 | 1   | 0.16920474 | 163   | 0.47073093 |
| 20619 | GO:0044425            | membrane part                   | 0.94 | 19  | 3.21489    | 1523  | 4.398302   |
| 3178  | GO:0004519            | endonuclease activity           | 0.94 | 3   | 0.5076142  | 356   | 1.0280994  |
| 6899  | GO:0009628            | response to abiotic stimulus    | 0.95 | 1   | 0.16920474 | 170   | 0.49094638 |
| 30204 | GO:0071840            | cellular component organiza     | 0.95 | 3   | 0.5076142  | 362   | 1.045427   |
| 4605  | GO:0006457 GO:0007022 | protein folding                 | 0.95 | 1   | 0.16920474 | 173   | 0.49961013 |
| 15949 | GO:0033554            | cellular response to stress     | 0.95 | 1   | 0.16920474 | 173   | 0.49961013 |
| 20521 | GO:0044271            | cellular nitrogen compound t    | 0.95 | 3   | 0.5076142  | 367   | 1.0598665  |
| 4215  | GO:0005975            | carbohydrate metabolic proc     | 0.95 | 11  | 1.8612521  | 990   | 2.8590407  |
| 3904  | GO:0005576            | extracellular region            | 0.95 | 1   | 0.16920474 | 178   | 0.5140497  |
| 20622 | GO:0044428            | nuclear part                    | 0.95 | 1   | 0.16920474 | 178   | 0.5140497  |
| 4572  | GO:0006412 GO:0006416 | translation                     | 0.96 | 1   | 0.16920474 | 180   | 0.5198256  |
| 5610  | GO:0008026            | ATP-dependent helicase act      | 0.96 | 1   | 0.16920474 | 183   | 0.52848935 |
| 28401 | GO:0070035            | purine NTP-dependent helic      | 0.96 | 1   | 0.16920474 | 183   | 0.52848935 |
| 8466  | GO:0015031 GO:0015831 | protein transport               | 0.96 | 1   | 0.16920474 | 185   | 0.53426516 |
| 20820 | GO:0045184            | establishment of protein loca   | 0.96 | 1   | 0.16920474 | 185   | 0.53426516 |
| 20640 | GO:0044446            | intracellular organelle part    | 0.96 | 7   | 1.1844332  | 710   | 2.0504231  |
| 20616 | GO:0044422            | organelle part                  | 0.96 | 7   | 1.1844332  | 712   | 2.0561988  |
| 5669  | GO:0008104            | protein localization            | 0.96 | 1   | 0.16920474 | 189   | 0.54581684 |
| 3068  | GO:0004386            | helicase activity               | 0.96 | 1   | 0.16920474 | 189   | 0.54581684 |
| 9874  | GO:0016835            | carbon-oxygen lyase activity    | 0.97 | 1   | 0.16920474 | 202   | 0.5833598  |
| 4459  | GO:0006259 GO:0055132 | DNA metabolic process           | 0.97 | 4   | 0.67681897 | 493   | 1.4237444  |
| 3863  | GO:0005488            | binding                         | 0.97 | 215 | 36.379017  | 13903 | 40.15075   |
| 9266  | GO:0016020            | membrane                        | 0.98 | 50  | 8.460237   | 3741  | 10.803708  |
| 19527 | GO:0043228            | non-membrane-bounded org        | 0.98 | 9   | 1.5228426  | 923   | 2.66555    |
| 19531 | GO:0043232            | intracellular non-membrane-     | 0.98 | 9   | 1.5228426  | 923   | 2.66555    |
| 4558  | GO:0006396 GO:0006394 | RNA processing                  | 0.98 | 1   | 0.16920474 | 219   | 0.63245445 |
| 3177  | GO:0004518            | nuclease activity               | 0.98 | 3   | 0.5076142  | 427   | 1.2331418  |
| 13531 | GO:0031072            | heat shock protein binding      | 0.98 | 1   | 0.16920474 | 230   | 0.6642216  |
| 2627  | GO:0003676            | nucleic acid binding            | 0.98 | 30  | 5.0761423  | 2453  | 7.0840673  |
| 11828 | GO:0019899            | enzyme binding                  | 0.98 | 1   | 0.16920474 | 237   | 0.684437   |
| 2653  | GO:0003723            | RNA binding                     | 0.98 | 7   | 1.1844332  | 797   | 2.3016722  |
| 13041 | GO:0030554            | adenyl nucleotide binding       | 0.99 | 4   | 0.67681897 | 550   | 1.5883559  |
| 14965 | GO:0032559            | adenyl ribonucleotide binding   | 0.99 | 4   | 0.67681897 | 550   | 1.5883559  |
| 20512 | GO:0044262 GO:0006092 | cellular carbohydrate metab     | 0.99 | 1   | 0.16920474 | 248   | 0.7162041  |
| 5661  | GO:0008092            | cytoskeletal protein binding    | 0.99 | 1   | 0.16920474 | 249   | 0.719092   |
| 4649  | GO:0006520 GO:0006519 | cellular amino acid metaboli    | 0.99 | 1   | 0.16920474 | 277   | 0.7999538  |
| 3884  | GO:0005524            | ATP binding                     | 0.99 | 3   | 0.5076142  | 524   | 1.51327    |
| 20356 | GO:0044106            | cellular amine metabolic pro    | 0.99 | 1   | 0.16920474 | 303   | 0.8750397  |
| 9889  | GO:0016853            | isomerase activity              | 0.99 | 1   | 0.16920474 | 306   | 0.8837035  |
| 6662  | GO:0009308            | amine metabolic process         | 1.00 | 1   | 0.16920474 | 314   | 0.9068068  |
| 20638 | GO:0044444            | cytoplasmic part                | 1.00 | 16  | 2.7072759  | 1644  | 4.7477403  |
| 19533 | GO:0043234            | protein complex                 | 1.00 | 6   | 1.0152284  | 848   | 2.448956   |
| 15392 | GO:0032991            | macromolecular complex          | 1.00 | 15  | 2.5380712  | 1616  | 4.666878   |
| 4320  | GO:0006082            | organic acid metabolic proc     | 1.00 | 1   | 0.16920474 | 369   | 1.0656425  |
| 11716 | GO:0019752            | carboxylic acid metabolic pro   | 1.00 | 1   | 0.16920474 | 369   | 1.0656425  |
| 19707 | GO:0043436            | oxoacid metabolic process       | 1.00 | 1   | 0.16920474 | 369   | 1.0656425  |
| 20618 | GO:0044424            | intracellular part              | 1.00 | 45  | 7.614213   | 3853  | 11.127155  |
| 18541 | GO:0042180            | cellular ketone metabolic pro   | 1.00 | 1   | 0.16920474 | 375   | 1.0829699  |
| 3945  | GO:0005622            | intracellular                   | 1.00 | 56  | 9.475466   | 4751  | 13.720507  |
| 14959 | GO:0032553            | ribonucleotide binding          | 1.00 | 4   | 0.67681897 | 795   | 2.2958963  |
| 14961 | GO:0032555            | purine ribonucleotide binding   | 1.00 | 4   | 0.67681897 | 795   | 2.2958963  |
| 10033 | GO:0017076            | purine nucleotide binding       | 1.00 | 4   | 0.67681897 | 797   | 2.3016722  |
| 3876  | GO:0005515 GO:0045308 | protein binding                 | 1.00 | 88  | 14.890017  | 6933  | 20.021948  |
| 4027  | GO:0005737            | cytoplasm                       | 1.00 | 17  | 2.8764806  | 2001  | 5.7787275  |
| 18000 | GO:0035639            | purine ribonucleoside triphos   | 1.00 | 3   | 0.5076142  | 769   | 2.2208104  |
| 3946  | GO:0005623            | cell                            | 1.00 | 105 | 17.766497  | 8227  | 23.758917  |
| 20657 | GO:0044464            | cell part                       | 1.00 | 105 | 17.766497  | 8227  | 23.758917  |
| 3903  | GO:0005575 GO:0008372 | cellular component              | 1.00 | 108 | 18.27411   | 8515  | 24.590637  |
| 131   | GO:0000166            | nucleotide binding              | 1.00 | 6   | 1.0152284  | 1213  | 3.5030468  |



| GO ID | GO ACCESSION         | GO Term                       | p-value | Count in Selection | % Count in Selection | Count in Total | % Count in Total |
|-------|----------------------|-------------------------------|---------|--------------------|----------------------|----------------|------------------|
| 6427  | GO:0009058           | biosynthetic process          | 0.00    | 42                 | 15.730337            | 2796           | 8.074624         |
| 17024 | GO:0034645 GO:003496 | cellular macromolecule bi     | 0.00    | 31                 | 11.610487            | 1999           | 5.7729516        |
| 6428  | GO:0009059 GO:004328 | macromolecule biosynthe       | 0.00    | 31                 | 11.610487            | 2003           | 5.7845035        |
| 20499 | GO:0044249           | cellular biosynthetic proce   | 0.00    | 37                 | 13.857677            | 2635           | 7.6096687        |
| 4476  | GO:0006278           | RNA-dependent DNA rep         | 0.00    | 7                  | 2.621723             | 166            | 0.4793947        |
| 4109  | GO:0005840 GO:003327 | ribosome                      | 0.00    | 14                 | 5.243446             | 682            | 1.9695613        |
| 6613  | GO:0009250           | glucan biosynthetic proce     | 0.00    | 2                  | 0.7490637            | 8              | 0.023103358      |
| 4460  | GO:0006260 GO:005513 | DNA replication               | 0.00    | 7                  | 2.621723             | 224            | 0.64689404       |
| 13018 | GO:0030529           | ribonucleoprotein comple      | 0.00    | 14                 | 5.243446             | 741            | 2.1399486        |
| 2837  | GO:0004028           | 3-chloroallyl aldehyde def    | 0.00    | 2                  | 0.7490637            | 9              | 0.025991278      |
| 31895 | GO:0090304           | nucleic acid metabolic pro    | 0.00    | 31                 | 11.610487            | 2340           | 6.7577324        |
| 6275  | GO:0008878           | glucose-1-phosphate ade       | 0.00    | 2                  | 0.7490637            | 10             | 0.0288792        |
| 26959 | GO:0055114           | oxidation-reduction proce     | 0.00    | 32                 | 11.985019            | 2490           | 7.1909204        |
| 5624  | GO:0008047           | enzyme activator activity     | 0.00    | 4                  | 1.4981273            | 85             | 0.24547319       |
| 4459  | GO:0006259 GO:005513 | DNA metabolic process         | 0.01    | 3                  | 3.7453184            | 493            | 1.4237444        |
| 19527 | GO:0043228           | non-membrane-bounded          | 0.01    | 10                 | 5.6179776            | 923            | 2.66555          |
| 19531 | GO:0043232           | intracellular non-membran     | 0.01    | 15                 | 5.6179776            | 923            | 2.66555          |
| 8493  | GO:0015074           | DNA integration               | 0.01    | 3                  | 1.1235955            | 47             | 0.13573223       |
| 16081 | GO:0033692           | cellular polysaccharide bi    | 0.01    | 2                  | 0.7490637            | 15             | 0.043318797      |
| 206   | GO:0000271           | polysaccharide biosynthe      | 0.01    | 2                  | 0.7490637            | 16             | 0.046206716      |
| 25635 | GO:0051345           | positive regulation of hydr   | 0.01    | 3                  | 1.1235955            | 53             | 0.15305975       |
| 19392 | GO:0043085           | positive regulation of cata   | 0.01    | 4                  | 1.4981273            | 104            | 0.30034366       |
| 20343 | GO:0044093           | positive regulation of mol    | 0.01    | 4                  | 1.4981273            | 104            | 0.30034366       |
| 2662  | GO:0003746 GO:000818 | translational elongation fact | 0.01    | 2                  | 0.7490637            | 22             | 0.06353424       |
| 4574  | GO:0006414 GO:000644 | translational elongation      | 0.01    | 2                  | 0.7490637            | 22             | 0.06353424       |
| 4357  | GO:0006139 GO:005513 | nucleobase, nucleoside, r     | 0.01    | 37                 | 13.857677            | 3285           | 9.486816         |
| 17016 | GO:0034637           | cellular carbohydrate bios    | 0.01    | 3                  | 1.1235955            | 63             | 0.18193895       |
| 9293  | GO:0016051 GO:000609 | carbohydrate biosynthetic     | 0.01    | 3                  | 1.1235955            | 64             | 0.18482687       |
| 9767  | GO:0016705           | oxidoreductase activity, a    | 0.01    | 2                  | 2.621723             | 329            | 0.95012563       |
| 4311  | GO:0006073           | cellular glucan metabolic     | 0.01    | 7                  | 0.7490637            | 24             | 0.06931008       |
| 20293 | GO:0044042           | glucan metabolic process      | 0.01    | 2                  | 0.7490637            | 24             | 0.06931008       |
| 3309  | GO:0004677           | DNA-dependent protein k       | 0.02    | 1                  | 0.37453184           | 2              | 0.00577584       |
| 4600  | GO:0006448           | regulation of translational   | 0.02    | 1                  | 0.37453184           | 2              | 0.00577584       |
| 4602  | GO:0006450 GO:000029 | regulation of translational   | 0.02    | 1                  | 0.37453184           | 2              | 0.00577584       |
| 14849 | GO:0032441           | phosphoribide a oxygenas      | 0.02    | 1                  | 0.37453184           | 2              | 0.00577584       |
| 24925 | GO:0050619           | phytochromobilin:ferredox     | 0.02    | 1                  | 0.37453184           | 2              | 0.00577584       |
| 26020 | GO:0051738           | xanthophyll binding           | 0.02    | 1                  | 0.37453184           | 2              | 0.00577584       |
| 5809  | GO:0008289           | lipid binding                 | 0.02    | 6                  | 2.247191             | 258            | 0.74508333       |
| 17020 | GO:0034641           | cellular nitrogen compour     | 0.02    | 40                 | 14.981274            | 3678           | 10.621769        |
| 3896  | GO:0005544           | calcium-dependent phosph      | 0.02    | 2                  | 0.7490637            | 26             | 0.075085916      |
| 9194  | GO:0015935           | small ribosomal subunit       | 0.02    | 2                  | 0.7490637            | 26             | 0.075085916      |
| 9771  | GO:0016709           | oxidoreductase activity, a    | 0.02    | 3                  | 1.1235955            | 71             | 0.2050423        |
| 9703  | GO:0016620           | oxidoreductase activity, a    | 0.02    | 3                  | 1.1235955            | 73             | 0.21081814       |
| 4906  | GO:0006807           | nitrogen compound metal       | 0.02    | 40                 | 14.981274            | 3725           | 10.757502        |
| 20487 | GO:0044237           | cellular metabolic process    | 0.02    | 78                 | 29.213484            | 8185           | 23.637625        |
| 4526  | GO:0006351 GO:000635 | transcription, DNA-depend     | 0.02    | 20                 | 7.490637             | 1575           | 4.548474         |
| 15176 | GO:0032774           | RNA biosynthetic process      | 0.02    | 26                 | 7.490637             | 1575           | 4.548474         |
| 20510 | GO:0044260 GO:003496 | cellular macromolecule m      | 0.02    | 50                 | 20.973783            | 5577           | 16.105928        |
| 11827 | GO:0019898 GO:003039 | extrinsic to membrane         | 0.02    | 2                  | 0.7490637            | 30             | 0.086637594      |
| 3895  | GO:0005543           | phospholipid binding          | 0.02    | 4                  | 1.4981273            | 140            | 0.40430877       |
| 20514 | GO:0044264           | cellular polysaccharide m     | 0.02    | 2                  | 0.7490637            | 31             | 0.08952551       |
| 4358  | GO:0006140           | regulation of nucleotide m    | 0.02    | 3                  | 1.1235955            | 80             | 0.2310336        |
| 7146  | GO:0009894           | regulation of catabolic pro   | 0.02    | 3                  | 1.1235955            | 80             | 0.2310336        |
| 13278 | GO:0030811           | regulation of nucleotide c    | 0.02    | 3                  | 1.1235955            | 80             | 0.2310336        |
| 13759 | GO:0031329           | regulation of cellular catal  | 0.02    | 3                  | 1.1235955            | 80             | 0.2310336        |
| 15521 | GO:0033121           | regulation of purine nucle    | 0.02    | 3                  | 1.1235955            | 80             | 0.2310336        |
| 2632  | GO:0003682           | chromatin binding             | 0.03    | 2                  | 0.7490637            | 33             | 0.09530135       |
| 2985  | GO:0004222           | metalloendopeptidase act      | 0.03    | 2                  | 0.7490637            | 34             | 0.09818927       |
| 2805  | GO:0003989           | acetyl-CoA carboxylase a      | 0.03    | 1                  | 0.37453184           | 4              | 0.011551679      |
| 3033  | GO:0004349           | glutamate 5-kinase activit    | 0.03    | 1                  | 0.37453184           | 4              | 0.011551679      |
| 3057  | GO:0004373           | glycogen (starch) synthas     | 0.03    | 1                  | 0.37453184           | 4              | 0.011551679      |
| 3100  | GO:0004430           | 1-phosphatidylinositol 4-k    | 0.03    | 1                  | 0.37453184           | 4              | 0.011551679      |
| 3466  | GO:0004859           | phospholipase inhibitor ac    | 0.03    | 1                  | 0.37453184           | 4              | 0.011551679      |
| 3640  | GO:0005098           | Ran GTPase activator act      | 0.03    | 1                  | 0.37453184           | 4              | 0.011551679      |
| 4218  | GO:0005978           | glycogen biosynthetic pro     | 0.03    | 1                  | 0.37453184           | 4              | 0.011551679      |
| 4859  | GO:0006743           | ubiquinone metabolic pro      | 0.03    | 1                  | 0.37453184           | 4              | 0.011551679      |
| 4860  | GO:0006744           | ubiquinone biosynthetic p     | 0.03    | 1                  | 0.37453184           | 4              | 0.011551679      |
| 5729  | GO:0008191           | metalloendopeptidase inh      | 0.03    | 1                  | 0.37453184           | 4              | 0.011551679      |
| 7792  | GO:0010576           | metalloenzyme regulator       | 0.03    | 1                  | 0.37453184           | 4              | 0.011551679      |
| 8911  | GO:0015633           | zinc transporting ATPase      | 0.03    | 1                  | 0.37453184           | 4              | 0.011551679      |
| 9718  | GO:0016636           | oxidoreductase activity, a    | 0.03    | 1                  | 0.37453184           | 4              | 0.011551679      |
| 9790  | GO:0016730           | oxidoreductase activity, a    | 0.03    | 1                  | 0.37453184           | 4              | 0.011551679      |
| 10039 | GO:0017084           | delta1-pyrroline-5-carboxy    | 0.03    | 1                  | 0.37453184           | 4              | 0.011551679      |
| 11781 | GO:0019834           | phospholipase A2 inhibit      | 0.03    | 1                  | 0.37453184           | 4              | 0.011551679      |
| 11857 | GO:0019932           | second-messenger-media        | 0.03    | 1                  | 0.37453184           | 4              | 0.011551679      |
| 14425 | GO:0032015           | regulation of Ran protein     | 0.03    | 1                  | 0.37453184           | 4              | 0.011551679      |
| 14724 | GO:0032316           | regulation of Ran GTPase      | 0.03    | 1                  | 0.37453184           | 4              | 0.011551679      |
| 15254 | GO:0032853           | positive regulation of Ran    | 0.03    | 1                  | 0.37453184           | 4              | 0.011551679      |
| 20918 | GO:0045300           | acyl-[acyl-carrier-protein]   | 0.03    | 1                  | 0.37453184           | 4              | 0.011551679      |
| 23493 | GO:0048015           | phosphatidylinositol-medi     | 0.03    | 1                  | 0.37453184           | 4              | 0.011551679      |
| 23495 | GO:0048017           | inositol lipid-mediated sig   | 0.03    | 1                  | 0.37453184           | 4              | 0.011551679      |
| 23942 | GO:0048551           | metalloenzyme inhibitor a     | 0.03    | 1                  | 0.37453184           | 4              | 0.011551679      |
| 26947 | GO:0055102           | lipase inhibitor activity     | 0.03    | 1                  | 0.37453184           | 4              | 0.011551679      |
| 7691  | GO:0010467           | gene expression               | 0.03    | 23                 | 8.614232             | 1974           | 5.7007537        |
| 13791 | GO:0031361           | integral to thylakoid mem     | 0.04    | 1                  | 0.37453184           | 5              | 0.0144396        |
| 3638  | GO:0005096           | GTPase activator activity     | 0.04    | 2                  | 0.7490637            | 41             | 0.118404716      |
| 19813 | GO:0043547           | positive regulation of GTP    | 0.04    | 2                  | 0.7490637            | 41             | 0.118404716      |
| 5607  | GO:0008022           | protein C-terminus bindin     | 0.04    | 2                  | 0.7490637            | 42             | 0.121292636      |
| 3029  | GO:0004345           | glucose-6-phosphate deh       | 0.05    | 1                  | 0.37453184           | 6              | 0.01732752       |
| 3208  | GO:0004563           | beta-N-acetylhexosaminic      | 0.05    | 1                  | 0.37453184           | 6              | 0.01732752       |
| 3342  | GO:0004723 GO:000859 | calcium-dependent protei      | 0.05    | 1                  | 0.37453184           | 6              | 0.01732752       |
| 5810  | GO:0008290           | F-actin capping protein cd    | 0.05    | 1                  | 0.37453184           | 6              | 0.01732752       |
| 7220  | GO:0009973           | adenylyl-sulfate reductase    | 0.05    | 1                  | 0.37453184           | 6              | 0.01732752       |
| 9248  | GO:0015994           | chlorophyll metabolic pro     | 0.05    | 1                  | 0.37453184           | 6              | 0.01732752       |
| 9249  | GO:0015995           | chlorophyll biosynthetic p    | 0.05    | 1                  | 0.37453184           | 6              | 0.01732752       |
| 9435  | GO:0016231           | beta-N-acetylglucosamin       | 0.05    | 1                  | 0.37453184           | 6              | 0.01732752       |
| 9825  | GO:0016774           | phosphotransferase activ      | 0.05    | 1                  | 0.37453184           | 6              | 0.01732752       |
| 13832 | GO:0031409           | pigment binding               | 0.05    | 1                  | 0.37453184           | 6              | 0.01732752       |
| 14264 | GO:0031849           | olfactory receptor binding    | 0.05    | 1                  | 0.37453184           | 6              | 0.01732752       |
| 18724 | GO:0042375           | quinone cofactor metabol      | 0.05    | 1                  | 0.37453184           | 6              | 0.01732752       |
| 21036 | GO:0045426           | quinone cofactor biosynth     | 0.05    | 1                  | 0.37453184           | 6              | 0.01732752       |
| 9600  | GO:0016491           | oxidoreductase activity       | 0.05    | 20                 | 7.490637             | 1724           | 4.9787736        |
| 14726 | GO:0032318           | regulation of Ras GTPase      | 0.05    | 2                  | 0.7490637            | 45             | 0.1299564        |
| 22096 | GO:0046578           | regulation of Ras protein     | 0.05    | 2                  | 0.7490637            | 45             | 0.1299564        |
| 25355 | GO:0051056           | regulation of small GTPas     | 0.05    | 2                  | 0.7490637            | 45             | 0.1299564        |
| 19253 | GO:0042936           | dipeptide transporter activ   | 0.05    | 3                  | 1.1235955            | 105            | 0.3032316        |
| 19255 | GO:0042938           | dipeptide transport           | 0.05    | 3                  | 1.1235955            | 105            | 0.3032316        |

|       |                       |                              |      |     |            |       |             |
|-------|-----------------------|------------------------------|------|-----|------------|-------|-------------|
| 3904  | GO:0005576            | extracellular region         | 0.05 | 4   | 1.4981273  | 178   | 0.5140497   |
| 9308  | GO:0016070            | RNA metabolic process        | 0.05 | 21  | 7.8651686  | 1855  | 5.3570914   |
| 20638 | GO:0044444            | cytoplasmic part             | 0.05 | 19  | 7.116105   | 1644  | 4.7477403   |
| 28930 | GO:0070566            | adenyllyltransferase activi  | 0.05 | 2   | 0.7490637  | 48    | 0.13862015  |
| 4216  | GO:0005976            | polysaccharide metabolic     | 0.06 | 2   | 0.7490637  | 50    | 0.14439599  |
| 5096  | GO:0007047            | cellular cell wall organizat | 0.06 | 2   | 0.7490637  | 50    | 0.14439599  |
| 6932  | GO:0009664            | plant-type cell wall organi  | 0.06 | 2   | 0.7490637  | 50    | 0.14439599  |
| 9783  | GO:0016722            | oxidoreductase activity, o   | 0.06 | 2   | 0.7490637  | 50    | 0.14439599  |
| 20857 | GO:0045229            | external encapsulating str   | 0.06 | 2   | 0.7490637  | 50    | 0.14439599  |
| 30033 | GO:0071669            | plant-type cell wall organi  | 0.06 | 2   | 0.7490637  | 50    | 0.14439599  |
| 9933  | GO:0016903            | oxidoreductase activity, a   | 0.06 | 3   | 1.1235955  | 113   | 0.32633495  |
| 18912 | GO:0042578            | phosphoric ester hydrolas    | 0.06 | 7   | 2.621723   | 444   | 1.2822365   |
| 7213  | GO:0009966 GO:0035466 | regulation of signal trans   | 0.06 | 2   | 0.7490637  | 51    | 0.14728391  |
| 12601 | GO:0023051            | regulation of signaling      | 0.06 | 2   | 0.7490637  | 51    | 0.14728391  |
| 3051  | GO:0004367            | glycerol-3-phosphate deh     | 0.06 | 1   | 0.37453184 | 8     | 0.023103358 |
| 3257  | GO:0004617            | phosphoglycerate dehydr      | 0.06 | 1   | 0.37453184 | 8     | 0.023103358 |
| 5635  | GO:0008060            | ARF GTPase activator ac      | 0.06 | 1   | 0.37453184 | 8     | 0.023103358 |
| 6684  | GO:0009331            | glycerol-3-phosphate deh     | 0.06 | 1   | 0.37453184 | 8     | 0.023103358 |
| 9549  | GO:0016421            | CoA carboxylase activity     | 0.06 | 1   | 0.37453184 | 8     | 0.023103358 |
| 9916  | GO:0016885            | ligase activity, forming ca  | 0.06 | 1   | 0.37453184 | 8     | 0.023103358 |
| 29246 | GO:0070882            | cellular cell wall organizat | 0.06 | 2   | 0.7490637  | 53    | 0.15305975  |
| 25626 | GO:0051336            | regulation of hydrolase ac   | 0.07 | 4   | 1.4981273  | 196   | 0.5660323   |
| 3158  | GO:0004499 GO:0047076 | flavin-containing monooxy    | 0.07 | 1   | 0.37453184 | 9     | 0.025991278 |
| 6670  | GO:0009317            | acetyl-CoA carboxylase c     | 0.07 | 1   | 0.37453184 | 9     | 0.025991278 |
| 11785 | GO:0019840            | isoprenoid binding           | 0.07 | 1   | 0.37453184 | 9     | 0.025991278 |
| 19254 | GO:0042937            | tripeptide transporter activ | 0.07 | 1   | 0.37453184 | 9     | 0.025991278 |
| 3340  | GO:0004721            | phosphoprotein phosphat      | 0.07 | 4   | 1.4981273  | 199   | 0.57469606  |
| 5767  | GO:0008237            | metallopeptidase activity    | 0.07 | 2   | 0.7490637  | 56    | 0.16172351  |
| 23973 | GO:0048583            | regulation of response to    | 0.07 | 2   | 0.7490637  | 57    | 0.16461143  |
| 29919 | GO:0071555            | cell wall organization       | 0.07 | 2   | 0.7490637  | 58    | 0.16749935  |
| 11205 | GO:0019202            | amino acid kinase activity   | 0.07 | 1   | 0.37453184 | 10    | 0.0288792   |
| 15183 | GO:0032781            | positive regulation of ATP   | 0.07 | 1   | 0.37453184 | 10    | 0.0288792   |
| 19728 | GO:0043462            | regulation of ATPase activi  | 0.07 | 1   | 0.37453184 | 10    | 0.0288792   |
| 21148 | GO:0045547            | dehydrodolichyl diphosph     | 0.07 | 1   | 0.37453184 | 10    | 0.0288792   |
| 27563 | GO:0060590            | ATPase regulator activity    | 0.07 | 1   | 0.37453184 | 10    | 0.0288792   |
| 31441 | GO:0080065            | 4-alpha-methyl-delta7-ste    | 0.07 | 1   | 0.37453184 | 10    | 0.0288792   |
| 196   | GO:0000254            | C-4 methylsterol oxidase     | 0.07 | 1   | 0.37453184 | 10    | 0.0288792   |
| 983   | GO:0001664            | G-protein-coupled recept     | 0.07 | 1   | 0.37453184 | 10    | 0.0288792   |
| 989   | GO:0001671            | ATPase activator activity    | 0.07 | 1   | 0.37453184 | 10    | 0.0288792   |
| 9839  | GO:0016791 GO:0016302 | phosphatase activity         | 0.08 | 6   | 2.247191   | 383   | 1.1060733   |
| 25095 | GO:0050790            | regulation of catalytic acti | 0.08 | 7   | 2.621723   | 480   | 1.3862015   |
| 12579 | GO:0022900            | electron transport chain     | 0.08 | 1   | 0.37453184 | 11    | 0.03176712  |
| 19256 | GO:0042939            | tripeptide transport         | 0.08 | 1   | 0.37453184 | 11    | 0.03176712  |
| 19473 | GO:0043170 GO:0043288 | macromolecule metabolic      | 0.08 | 60  | 22.47191   | 6553  | 18.92454    |
| 28366 | GO:0065009            | regulation of molecular fu   | 0.08 | 7   | 2.621723   | 484   | 1.3977532   |
| 6018  | GO:0008559 GO:0005228 | xenobiotic-transporting A    | 0.08 | 2   | 0.7490637  | 62    | 0.17905103  |
| 19225 | GO:0042908            | xenobiotic transport         | 0.08 | 2   | 0.7490637  | 62    | 0.17905103  |
| 19227 | GO:0042910            | xenobiotic transporter act   | 0.08 | 2   | 0.7490637  | 62    | 0.17905103  |
| 25820 | GO:0051536            | iron-sulfur cluster binding  | 0.09 | 2   | 0.7490637  | 64    | 0.18482687  |
| 25824 | GO:0051540            | metal cluster binding        | 0.09 | 2   | 0.7490637  | 64    | 0.18482687  |
| 3386  | GO:0004773            | sterol-sulfatase activity    | 0.09 | 1   | 0.37453184 | 12    | 0.03465504  |
| 4217  | GO:0005977            | glycogen metabolic proces    | 0.09 | 1   | 0.37453184 | 12    | 0.03465504  |
| 4344  | GO:0006112            | energy reserve metabolic     | 0.09 | 1   | 0.37453184 | 12    | 0.03465504  |
| 5965  | GO:0008484            | sulfuric ester hydrolase at  | 0.09 | 1   | 0.37453184 | 12    | 0.03465504  |
| 8607  | GO:0015197 GO:0015633 | peptide transporter activit  | 0.09 | 3   | 1.1235955  | 139   | 0.40142086  |
| 8608  | GO:0015198            | oligopeptide transporter a   | 0.09 | 3   | 1.1235955  | 139   | 0.40142086  |
| 12794 | GO:0030234            | enzyme regulator activity    | 0.09 | 6   | 2.247191   | 403   | 1.1638317   |
| 2628  | GO:0003677            | DNA binding                  | 0.09 | 14  | 5.243446   | 1224  | 3.534814    |
| 7551  | GO:0010327            | acetyl CoA:(Z)-3-hexen-1-    | 0.10 | 1   | 0.37453184 | 13    | 0.037542958 |
| 4944  | GO:0006857            | oligopeptide transport       | 0.10 | 3   | 1.1235955  | 141   | 0.4071967   |
| 9099  | GO:0015833            | peptide transport            | 0.10 | 3   | 1.1235955  | 141   | 0.4071967   |
| 21710 | GO:0046148            | pigment biosynthetic proc    | 0.10 | 2   | 0.7490637  | 69    | 0.19926646  |
| 15524 | GO:0033124            | regulation of GTP catabol    | 0.10 | 2   | 0.7490637  | 70    | 0.20215438  |
| 19394 | GO:0043087            | regulation of GTPase acti    | 0.10 | 2   | 0.7490637  | 70    | 0.20215438  |
| 3641  | GO:0005099            | Ras GTPase activator act     | 0.10 | 1   | 0.37453184 | 14    | 0.040430877 |
| 14728 | GO:0032320            | positive regulation of Ras   | 0.10 | 1   | 0.37453184 | 14    | 0.040430877 |
| 25040 | GO:0050734            | hydroxycinnamoyltransfer     | 0.10 | 1   | 0.37453184 | 14    | 0.040430877 |
| 9740  | GO:0016667            | oxidoreductase activity, a   | 0.11 | 2   | 0.7490637  | 72    | 0.20793022  |
| 5705  | GO:0008152            | metabolic process            | 0.11 | 145 | 54.307117  | 17432 | 50.34222    |
| 18786 | GO:0042440            | pigment metabolic proces     | 0.11 | 2   | 0.7490637  | 73    | 0.21081814  |
| 9494  | GO:0016311            | dephosphorylation            | 0.11 | 6   | 2.247191   | 425   | 1.227366    |
| 27562 | GO:0060589            | nucleoside-triphosphatas     | 0.11 | 3   | 1.1235955  | 152   | 0.4389638   |
| 3382  | GO:0004768 GO:0016214 | stearoyl-CoA 9-desaturas     | 0.12 | 1   | 0.37453184 | 16    | 0.046206716 |
| 7521  | GO:0010295            | (+)-abscisic acid 8'-hydro   | 0.12 | 1   | 0.37453184 | 16    | 0.046206716 |
| 9189  | GO:0015929            | hexosaminidase activity      | 0.12 | 1   | 0.37453184 | 16    | 0.046206716 |
| 9427  | GO:0016215            | CoA desaturase activity      | 0.12 | 1   | 0.37453184 | 16    | 0.046206716 |
| 19338 | GO:0043022 GO:0030376 | ribosome binding             | 0.12 | 1   | 0.37453184 | 16    | 0.046206716 |
| 15392 | GO:0032991            | macromolecular complex       | 0.12 | 17  | 6.367041   | 1616  | 4.666878    |
| 3885  | GO:0005525            | GTP binding                  | 0.12 | 4   | 1.4981273  | 245   | 0.70754033  |
| 11032 | GO:0019001            | guanyl nucleotide binding    | 0.12 | 4   | 1.4981273  | 245   | 0.70754033  |
| 14967 | GO:0032561            | guanyl ribonucleotide bind   | 0.12 | 4   | 1.4981273  | 245   | 0.70754033  |
| 9923  | GO:0016892            | endoribonuclease activity    | 0.12 | 1   | 0.37453184 | 17    | 0.049094636 |
| 9925  | GO:0016894            | endonuclease activity, ac    | 0.12 | 1   | 0.37453184 | 17    | 0.049094636 |
| 16281 | GO:0033897            | ribonuclease T2 activity     | 0.12 | 1   | 0.37453184 | 17    | 0.049094636 |
| 15189 | GO:0032787            | monocarboxylic acid meta     | 0.13 | 2   | 0.7490637  | 81    | 0.23392151  |
| 2659  | GO:0003730            | mRNA 3'-UTR binding          | 0.13 | 1   | 0.37453184 | 18    | 0.051982556 |
| 4576  | GO:0006417 GO:0006444 | regulation of translation    | 0.13 | 1   | 0.37453184 | 18    | 0.051982556 |
| 5776  | GO:0008252            | nucleotidase activity        | 0.13 | 1   | 0.37453184 | 18    | 0.051982556 |
| 8469  | GO:0015036            | disulfide oxidoreductase     | 0.13 | 1   | 0.37453184 | 18    | 0.051982556 |
| 2658  | GO:0003729            | mRNA binding                 | 0.13 | 2   | 0.7490637  | 82    | 0.23680943  |
| 3290  | GO:0004656            | procollagen-proline 4-diox   | 0.14 | 1   | 0.37453184 | 19    | 0.054870475 |
| 11752 | GO:0019798            | procollagen-proline diox     | 0.14 | 1   | 0.37453184 | 19    | 0.054870475 |
| 13966 | GO:0031543            | peptidyl-proline dioxygena   | 0.14 | 1   | 0.37453184 | 19    | 0.054870475 |
| 13968 | GO:0031545            | peptidyl-proline 4-dioxyme   | 0.14 | 1   | 0.37453184 | 19    | 0.054870475 |
| 2627  | GO:0003676            | nucleic acid binding         | 0.14 | 24  | 8.988764   | 2453  | 7.0840673   |
| 4327  | GO:0006091            | generation of precursor m    | 0.14 | 2   | 0.7490637  | 84    | 0.24258527  |
| 18000 | GO:0035639            | purine ribonucleoside triph  | 0.14 | 9   | 3.3707864  | 769   | 2.2208104   |
| 4027  | GO:0005737            | cytoplasm                    | 0.14 | 20  | 7.490637   | 2001  | 5.7787275   |
| 9784  | GO:0016723            | oxidoreductase activity, o   | 0.14 | 1   | 0.37453184 | 20    | 0.0577584   |
| 225   | GO:0000293            | ferric-chelate reductase a   | 0.14 | 1   | 0.37453184 | 20    | 0.0577584   |
| 3341  | GO:0004722 GO:0000158 | protein serine/threonine p   | 0.15 | 3   | 1.1235955  | 171   | 0.4938343   |
| 3156  | GO:0004497            | monooxygenase activity       | 0.15 | 3   | 1.1235955  | 172   | 0.49672222  |
| 4605  | GO:0006457 GO:0007022 | protein folding              | 0.15 | 3   | 1.1235955  | 173   | 0.49961013  |
| 9768  | GO:0016706            | oxidoreductase activity, a   | 0.15 | 3   | 1.1235955  | 175   | 0.505386    |
| 3831  | GO:0005385            | zinc ion transmembrane t     | 0.16 | 1   | 0.37453184 | 22    | 0.06353424  |
| 4882  | GO:0006778            | porphyrin metabolic proces   | 0.16 | 1   | 0.37453184 | 22    | 0.06353424  |
| 4883  | GO:0006779            | porphyrin biosynthetic pro   | 0.16 | 1   | 0.37453184 | 22    | 0.06353424  |
| 4924  | GO:0006829            | zinc ion transport           | 0.16 | 1   | 0.37453184 | 22    | 0.06353424  |
| 7823  | GO:0010608            | posttranscriptional regulat  | 0.16 | 1   | 0.37453184 | 22    | 0.06353424  |
| 29941 | GO:0071577            | zinc ion transmembrane t     | 0.16 | 1   | 0.37453184 | 22    | 0.06353424  |
| 5693  | GO:0008135            | translation factor activity  | 0.16 | 2   | 0.7490637  | 92    | 0.26568863  |
| 14959 | GO:0032553            | ribonucleotide binding       | 0.16 | 9   | 3.3707864  | 795   | 2.2558963   |



|       |                       |                              |      |    |            |       |             |
|-------|-----------------------|------------------------------|------|----|------------|-------|-------------|
| 14961 | GO:0032555            | purine ribonucleotide bind   | 0.16 | 9  | 3.3707864  | 795   | 2.2958963   |
| 10033 | GO:0017076            | purine nucleotide binding    | 0.17 | 9  | 3.3707864  | 797   | 2.3016722   |
| 3262  | GO:0004622 GO:0045128 | lysophospholipase activit    | 0.17 | 24 | 0.37453184 | 24    | 0.06931008  |
| 8559  | GO:0015146            | pentose transmembrane t      | 0.17 | 1  | 0.37453184 | 24    | 0.06931008  |
| 8561  | GO:0015148            | D-xylose transmembrane       | 0.17 | 1  | 0.37453184 | 24    | 0.06931008  |
| 8829  | GO:0015519            | D-xylose:hydrogen sympo      | 0.17 | 1  | 0.37453184 | 24    | 0.06931008  |
| 9019  | GO:0015750            | pentose transport            | 0.17 | 1  | 0.37453184 | 24    | 0.06931008  |
| 9022  | GO:0015753            | D-xylose transport           | 0.17 | 1  | 0.37453184 | 24    | 0.06931008  |
| 9779  | GO:0016717            | oxidoreductase activity, a   | 0.17 | 1  | 0.37453184 | 24    | 0.06931008  |
| 13657 | GO:0031225            | anchored to membrane         | 0.17 | 1  | 0.37453184 | 24    | 0.06931008  |
| 25578 | GO:0051287 GO:0051288 | NAD binding                  | 0.17 | 1  | 0.37453184 | 24    | 0.06931008  |
| 22357 | GO:0046854 GO:004683  | phosphatidylinositol phos    | 0.18 | 1  | 0.37453184 | 25    | 0.072197996 |
| 19393 | GO:0043086            | negative regulation of cat   | 0.18 | 3  | 1.1235955  | 188   | 0.54292893  |
| 20342 | GO:0044092            | negative regulation of mo    | 0.18 | 3  | 1.1235955  | 188   | 0.54292893  |
| 3415  | GO:0004805            | trehalose-phosphatase ac     | 0.18 | 1  | 0.37453184 | 26    | 0.075085916 |
| 9884  | GO:0016847 GO:0034100 | 1-aminocyclopropane-1-c      | 0.18 | 1  | 0.37453184 | 26    | 0.075085916 |
| 10911 | GO:0018871            | 1-aminocyclopropane-1-c      | 0.18 | 1  | 0.37453184 | 26    | 0.075085916 |
| 18579 | GO:0042218            | 1-aminocyclopropane-1-c      | 0.18 | 1  | 0.37453184 | 26    | 0.075085916 |
| 30689 | GO:0072330            | monocarboxylic acid bios     | 0.18 | 1  | 0.37453184 | 26    | 0.075085916 |
| 24968 | GO:0050662            | coenzyme binding             | 0.18 | 3  | 1.1235955  | 191   | 0.5515927   |
| 9541  | GO:0016413            | O-acetyltransferase activi   | 0.19 | 1  | 0.37453184 | 27    | 0.077973835 |
| 22340 | GO:0046834            | lipid phosphorylation        | 0.19 | 1  | 0.37453184 | 27    | 0.077973835 |
| 1029  | GO:0001727            | lipid kinase activity        | 0.19 | 1  | 0.37453184 | 27    | 0.077973835 |
| 9238  | GO:0015980            | energy derivation by oxid    | 0.19 | 1  | 0.37453184 | 28    | 0.080861755 |
| 19337 | GO:0043021            | ribonucleoprotein binding    | 0.20 | 1  | 0.37453184 | 29    | 0.083749674 |
| 2870  | GO:0004064            | arylesterase activity        | 0.21 | 1  | 0.37453184 | 30    | 0.086637594 |
| 3009  | GO:0004322            | ferroxidase activity         | 0.21 | 1  | 0.37453184 | 30    | 0.086637594 |
| 9785  | GO:0016724            | oxidoreductase activity, o   | 0.21 | 1  | 0.37453184 | 30    | 0.086637594 |
| 15414 | GO:0033013            | tetrapyrrole metabolic pro   | 0.21 | 1  | 0.37453184 | 30    | 0.086637594 |
| 15415 | GO:0033014            | tetrapyrrole biosynthetic p  | 0.21 | 1  | 0.37453184 | 30    | 0.086637594 |
| 3626  | GO:0005083            | small GTPase regulator, a    | 0.21 | 2  | 0.7490637  | 111   | 0.3205591   |
| 14422 | GO:0032012            | regulation of ARF protein    | 0.21 | 1  | 0.37453184 | 31    | 0.08952551  |
| 14720 | GO:0032312            | regulation of ARF GTPase     | 0.21 | 1  | 0.37453184 | 31    | 0.08952551  |
| 29918 | GO:0071554            | cell wall organization or bi | 0.21 | 2  | 0.7490637  | 112   | 0.32344702  |
| 3265  | GO:0004630            | phospholipase D activity     | 0.22 | 1  | 0.37453184 | 32    | 0.09241343  |
| 4757  | GO:0006633 GO:000003  | fatty acid biosynthetic pro  | 0.22 | 1  | 0.37453184 | 32    | 0.09241343  |
| 6942  | GO:0009674            | potassium:sodium sympo       | 0.22 | 1  | 0.37453184 | 32    | 0.09241343  |
| 12522 | GO:0022820            | potassium ion symporter      | 0.22 | 1  | 0.37453184 | 32    | 0.09241343  |
| 21041 | GO:0045431            | flavonol synthase activity   | 0.22 | 1  | 0.37453184 | 32    | 0.09241343  |
| 25836 | GO:0051552            | flavone metabolic process    | 0.22 | 1  | 0.37453184 | 32    | 0.09241343  |
| 25837 | GO:0051553            | flavone biosynthetic proc    | 0.22 | 1  | 0.37453184 | 32    | 0.09241343  |
| 25838 | GO:0051554            | flavonol metabolic proces    | 0.22 | 1  | 0.37453184 | 32    | 0.09241343  |
| 25839 | GO:0051555            | flavonol biosynthetic proc   | 0.22 | 1  | 0.37453184 | 32    | 0.09241343  |
| 7229  | GO:0009987 GO:000815  | cellular process             | 0.22 | 88 | 32.9588    | 10601 | 30.614838   |
| 18956 | GO:0042626            | ATPase activity, coupled     | 0.22 | 3  | 1.1235955  | 211   | 0.6093511   |
| 9861  | GO:0016820            | hydrolase activity, actin    | 0.22 | 3  | 1.1235955  | 212   | 0.612239    |
| 24966 | GO:0050660            | flavin adenine dinucleotid   | 0.23 | 2  | 0.7490637  | 118   | 0.34077454  |
| 11206 | GO:0019203            | carbohydrate phosphatas      | 0.24 | 1  | 0.37453184 | 35    | 0.10107719  |
| 12817 | GO:0030258            | lipid modification           | 0.24 | 1  | 0.37453184 | 35    | 0.10107719  |
| 22012 | GO:0046488 GO:003038  | phosphatidylinositol meta    | 0.24 | 1  | 0.37453184 | 35    | 0.10107719  |
| 4232  | GO:0005992            | trehalose biosynthetic pro   | 0.24 | 1  | 0.37453184 | 36    | 0.10396511  |
| 9393  | GO:0016165            | lipoxygenase activity        | 0.24 | 1  | 0.37453184 | 36    | 0.10396511  |
| 3260  | GO:0004620            | phospholipase activity       | 0.25 | 2  | 0.7490637  | 123   | 0.35521415  |
| 25485 | GO:0051188            | cofactor biosynthetic proc   | 0.25 | 2  | 0.7490637  | 123   | 0.35521415  |
| 20488 | GO:0044238            | primary metabolic process    | 0.25 | 76 | 28.46442   | 9167  | 26.47356    |
| 4231  | GO:0005991            | trehalose metabolic proces   | 0.25 | 1  | 0.37453184 | 38    | 0.10974095  |
| 7072  | GO:0009813            | flavonoid biosynthetic pro   | 0.27 | 1  | 0.37453184 | 40    | 0.1155168   |
| 4851  | GO:0006733            | oxidoreduction coenzyme      | 0.27 | 1  | 0.37453184 | 41    | 0.118404716 |
| 19758 | GO:0043492            | ATPase activity, coupled     | 0.27 | 3  | 1.1235955  | 235   | 0.67866117  |
| 3877  | GO:0005516            | calmodulin binding           | 0.27 | 3  | 1.1235955  | 236   | 0.6815491   |
| 2653  | GO:0003723            | RNA binding                  | 0.27 | 8  | 2.9962547  | 797   | 2.3016722   |
| 4756  | GO:0006631            | fatty acid metabolic proces  | 0.28 | 1  | 0.37453184 | 42    | 0.121292636 |
| 6666  | GO:0009312            | oligosaccharide biosynthe    | 0.28 | 1  | 0.37453184 | 42    | 0.121292636 |
| 9370  | GO:0016138            | glycoside biosynthetic pro   | 0.28 | 1  | 0.37453184 | 42    | 0.121292636 |
| 21880 | GO:0046351            | disaccharide biosynthetic    | 0.28 | 1  | 0.37453184 | 42    | 0.121292636 |
| 14676 | GO:0032268            | regulation of cellular prote | 0.28 | 1  | 0.37453184 | 43    | 0.124180555 |
| 25538 | GO:0051246            | regulation of protein meta   | 0.28 | 1  | 0.37453184 | 43    | 0.124180555 |
| 7071  | GO:0009812            | flavonoid metabolic proces   | 0.29 | 1  | 0.37453184 | 44    | 0.12706847  |
| 9753  | GO:0016682            | oxidoreductase activity, a   | 0.29 | 1  | 0.37453184 | 44    | 0.12706847  |
| 4942  | GO:0006855            | drug transmembrane tran      | 0.29 | 2  | 0.7490637  | 139   | 0.40142086  |
| 8642  | GO:0015238 GO:001523  | drug transmembrane tran      | 0.29 | 2  | 0.7490637  | 139   | 0.40142086  |
| 9154  | GO:0015893            | drug transport               | 0.29 | 2  | 0.7490637  | 139   | 0.40142086  |
| 18832 | GO:0042493 GO:001703  | response to drug             | 0.29 | 2  | 0.7490637  | 139   | 0.40142086  |
| 31431 | GO:0008004            | low affinity nitrate transme | 0.29 | 1  | 0.37453184 | 45    | 0.1299564   |
| 13164 | GO:0030695            | GTPase regulator activity    | 0.30 | 2  | 0.7490637  | 142   | 0.4100846   |
| 20512 | GO:0044262 GO:000609  | cellular carbohydrate met    | 0.30 | 3  | 1.1235955  | 248   | 0.7162041   |
| 9396  | GO:0016168            | chlorophyll binding          | 0.30 | 1  | 0.37453184 | 46    | 0.13284431  |
| 4773  | GO:0006650 GO:000665  | glycerophospholipid meta     | 0.31 | 1  | 0.37453184 | 47    | 0.13573223  |
| 8497  | GO:0015079 GO:002281  | potassium ion transmembr     | 0.31 | 1  | 0.37453184 | 47    | 0.13573223  |
| 22010 | GO:0046486            | glycerolipid metabolic pro   | 0.31 | 1  | 0.37453184 | 47    | 0.13573223  |
| 3307  | GO:0004675            | transmembrane receptor       | 0.31 | 4  | 1.4981273  | 367   | 1.0598665   |
| 31421 | GO:0080044            | quercetin 7-O-glucosyltra    | 0.32 | 1  | 0.37453184 | 49    | 0.14150807  |
| 9829  | GO:0016779            | nucleotidyltransferase act   | 0.32 | 2  | 0.7490637  | 148   | 0.42741212  |
| 8749  | GO:0015399            | primary active transmembr    | 0.32 | 3  | 1.1235955  | 260   | 0.75085914  |
| 8753  | GO:0015405            | P-P-bond-hydrolysis-drive    | 0.32 | 3  | 1.1235955  | 260   | 0.75085914  |
| 4897  | GO:0006793            | phosphorus metabolic proc    | 0.32 | 25 | 9.363296   | 2925  | 8.4471655   |
| 4900  | GO:0006796            | phosphate metabolic proc     | 0.32 | 25 | 9.363296   | 2925  | 8.4471655   |
| 3099  | GO:0004428            | inositol or phosphatidylin   | 0.33 | 1  | 0.37453184 | 51    | 0.14728391  |
| 3293  | GO:0004659            | prenyltransferase activity   | 0.33 | 1  | 0.37453184 | 51    | 0.14728391  |
| 8908  | GO:0015629            | actin cytoskeleton           | 0.33 | 1  | 0.37453184 | 51    | 0.14728391  |
| 18541 | GO:0042180            | cellular ketone metabolic    | 0.33 | 4  | 1.4981273  | 375   | 1.0829699   |
| 2809  | GO:0003993            | acid phosphatase activity    | 0.33 | 1  | 0.37453184 | 52    | 0.15017183  |
| 6965  | GO:0009699            | phenylpropanoid biosynth     | 0.33 | 1  | 0.37453184 | 52    | 0.15017183  |
| 6424  | GO:0009055 GO:000905  | electron carrier activity    | 0.33 | 2  | 0.7490637  | 154   | 0.44473964  |
| 131   | GO:0000166            | nucleotide binding           | 0.33 | 11 | 4.11985    | 1213  | 3.5030468   |
| 9750  | GO:0016679            | oxidoreductase activity, a   | 0.34 | 1  | 0.37453184 | 53    | 0.15305975  |
| 9699  | GO:0016616            | oxidoreductase activity, a   | 0.34 | 3  | 1.1235955  | 266   | 0.7681867   |
| 3464  | GO:0004857            | enzyme inhibitor activity    | 0.34 | 2  | 0.7490637  | 157   | 0.4534034   |
| 17918 | GO:0035556 GO:000724  | intracellular signal transdu | 0.34 | 1  | 0.37453184 | 54    | 0.15594767  |
| 4224  | GO:0005984            | disaccharide metabolic pr    | 0.35 | 1  | 0.37453184 | 56    | 0.16172351  |
| 9369  | GO:0016137            | glycoside metabolic proces   | 0.35 | 1  | 0.37453184 | 56    | 0.16172351  |
| 9883  | GO:0016846            | carbon-sulfur lyase activit  | 0.35 | 1  | 0.37453184 | 56    | 0.16172351  |
| 6441  | GO:0009072            | aromatic amino acid fami     | 0.36 | 1  | 0.37453184 | 57    | 0.16461143  |
| 25483 | GO:0051186            | cofactor metabolic proces    | 0.36 | 2  | 0.7490637  | 164   | 0.47361887  |
| 6665  | GO:0009311            | oligosaccharide metabol      | 0.36 | 1  | 0.37453184 | 58    | 0.16749935  |
| 8558  | GO:0015145            | monosaccharide transme       | 0.36 | 1  | 0.37453184 | 58    | 0.16749935  |
| 9018  | GO:0015749            | monosaccharide transpor      | 0.36 | 1  | 0.37453184 | 58    | 0.16749935  |
| 18981 | GO:0042651            | thylakoid membrane           | 0.37 | 1  | 0.37453184 | 59    | 0.17038727  |
| 2980  | GO:0004185            | serine-type carboxypeptid    | 0.37 | 1  | 0.37453184 | 60    | 0.17327519  |
| 5652  | GO:0008081 GO:000443  | phosphonic diester hydro     | 0.37 | 1  | 0.37453184 | 60    | 0.17327519  |
| 6964  | GO:0009698            | phenylpropanoid metabol      | 0.37 | 1  | 0.37453184 | 60    | 0.17327519  |
| 28375 | GO:0070008            | serine-type exopeptidase     | 0.37 | 1  | 0.37453184 | 60    | 0.17327519  |
| 4768  | GO:0006644            | phospholipid metabolic pr    | 0.38 | 1  | 0.37453184 | 61    | 0.1761631   |

|       |                      |                              |      |     |            |       |            |
|-------|----------------------|------------------------------|------|-----|------------|-------|------------|
| 8526  | GO:0015112           | nitrate transmembrane tra    | 0.38 | 1   | 0.37453184 | 61    | 0.1761631  |
| 8975  | GO:0015706GO:0006872 | nitrate transport            | 0.38 | 1   | 0.37453184 | 61    | 0.1761631  |
| 3884  | GO:0005524           | ATP binding                  | 0.38 | 5   | 1.8726592  | 524   | 1.51327    |
| 2978  | GO:0004180           | carboxypeptidase activity    | 0.38 | 1   | 0.37453184 | 62    | 0.17905103 |
| 17457 | GO:0035091           | phosphatidylinositol bindi   | 0.38 | 1   | 0.37453184 | 62    | 0.17905103 |
| 8675  | GO:0015293           | symporter activity           | 0.39 | 2   | 0.7490637  | 173   | 0.49961013 |
| 5704  | GO:0008150GO:0000004 | biological process           | 0.39 | 174 | 65.16854   | 22215 | 64.155136  |
| 22416 | GO:0046915           | transition metal ion transp  | 0.39 | 1   | 0.37453184 | 64    | 0.18482687 |
| 9697  | GO:0016614           | oxidoreductase activity, a   | 0.39 | 3   | 1.1235955  | 293   | 0.84616053 |
| 11616 | GO:0019637           | organophosphate metabo       | 0.40 | 1   | 0.37453184 | 65    | 0.18771479 |
| 25314 | GO:0051015           | actin filament binding       | 0.40 | 1   | 0.37453184 | 65    | 0.18771479 |
| 18953 | GO:0042623           | ATPase activity, coupled     | 0.40 | 5   | 1.8726592  | 537   | 1.550813   |
| 3180  | GO:0004521           | endoribonuclease activity    | 0.40 | 1   | 0.37453184 | 66    | 0.1906027  |
| 9765  | GO:0016702           | oxidoreductase activity, a   | 0.40 | 1   | 0.37453184 | 66    | 0.1906027  |
| 9837  | GO:0016788           | hydrolase activity, acting   | 0.40 | 13  | 4.8689137  | 1534  | 4.430069   |
| 4572  | GO:0006412GO:0006411 | translation                  | 0.40 | 2   | 0.7490637  | 180   | 0.5198256  |
| 32    | GO:0000041           | transition metal ion transp  | 0.41 | 1   | 0.37453184 | 68    | 0.19637854 |
| 5610  | GO:0008026           | ATP-dependent helicase       | 0.41 | 2   | 0.7490637  | 183   | 0.52848935 |
| 28401 | GO:0070035           | purine NTP-dependent he      | 0.41 | 2   | 0.7490637  | 183   | 0.52848935 |
| 20505 | GO:0044255           | cellular lipid metabolic pro | 0.42 | 2   | 0.7490637  | 184   | 0.53137726 |
| 4844  | GO:0006725           | cellular aromatic compou     | 0.42 | 2   | 0.7490637  | 185   | 0.53426516 |
| 9486  | GO:0016298           | lipase activity              | 0.42 | 2   | 0.7490637  | 185   | 0.53426516 |
| 5726  | GO:0008187           | poly-pyrimidine tract bindi  | 0.42 | 1   | 0.37453184 | 70    | 0.20215438 |
| 5788  | GO:0008266           | poly(U) RNA binding          | 0.42 | 1   | 0.37453184 | 70    | 0.20215438 |
| 23522 | GO:0048046           | apoplast                     | 0.42 | 1   | 0.37453184 | 70    | 0.20215438 |
| 13041 | GO:0030554           | adenyl nucleotide binding    | 0.42 | 5   | 1.8726592  | 550   | 1.5883559  |
| 14965 | GO:0032559           | adenyl ribonucleotide bind   | 0.42 | 5   | 1.8726592  | 550   | 1.5883559  |
| 6475  | GO:0009108           | coenzyme biosynthetic pr     | 0.43 | 1   | 0.37453184 | 72    | 0.20793022 |
| 9764  | GO:0016701           | oxidoreductase activity, a   | 0.43 | 1   | 0.37453184 | 72    | 0.20793022 |
| 3068  | GO:0004386           | helicase activity            | 0.43 | 2   | 0.7490637  | 189   | 0.54581684 |
| 3306  | GO:0004674GO:0004699 | protein serine/threonine k   | 0.43 | 9   | 3.3707864  | 1062  | 3.0669708  |
| 3311  | GO:0004683GO:0004684 | calmodulin-dependent pro     | 0.44 | 1   | 0.37453184 | 74    | 0.21370606 |
| 25510 | GO:0051213           | dioxygenase activity         | 0.44 | 1   | 0.37453184 | 75    | 0.21659398 |
| 28365 | GO:0065008           | regulation of biological qu  | 0.44 | 3   | 1.1235955  | 316   | 0.9125827  |
| 2897  | GO:0004091GO:0004302 | carboxylesterase activity    | 0.44 | 2   | 0.7490637  | 194   | 0.5602564  |
| 2819  | GO:0004004           | ATP-dependent RNA heli       | 0.45 | 1   | 0.37453184 | 78    | 0.22525774 |
| 5725  | GO:0008186GO:0004011 | RNA-dependent ATPase         | 0.45 | 1   | 0.37453184 | 78    | 0.22525774 |
| 30865 | GO:0072509           | divalent inorganic cation t  | 0.45 | 1   | 0.37453184 | 78    | 0.22525774 |
| 2654  | GO:0003724           | RNA helicase activity        | 0.46 | 1   | 0.37453184 | 80    | 0.2310336  |
| 23515 | GO:0048037           | cofactor binding             | 0.46 | 3   | 1.1235955  | 327   | 0.94434977 |
| 29202 | GO:0070838           | divalent metal ion transpo   | 0.47 | 1   | 0.37453184 | 82    | 0.23680943 |
| 16738 | GO:0034357           | photosynthetic membrane      | 0.47 | 1   | 0.37453184 | 83    | 0.23969735 |
| 4954  | GO:0006869           | lipid transport              | 0.48 | 2   | 0.7490637  | 208   | 0.6006873  |
| 8085  | GO:0010876           | lipid localization           | 0.48 | 2   | 0.7490637  | 208   | 0.6006873  |
| 4912  | GO:0006813GO:0015456 | potassium ion transport      | 0.48 | 1   | 0.37453184 | 84    | 0.24258527 |
| 30168 | GO:0071804           | cellular potassium ion tra   | 0.48 | 1   | 0.37453184 | 84    | 0.24258527 |
| 30169 | GO:0071805           | potassium ion transmembr     | 0.48 | 1   | 0.37453184 | 84    | 0.24258527 |
| 30867 | GO:0072511           | divalent inorganic cation t  | 0.48 | 1   | 0.37453184 | 84    | 0.24258527 |
| 9295  | GO:0016053           | organic acid biosynthetic    | 0.49 | 2   | 0.7490637  | 211   | 0.6093511  |
| 21058 | GO:0045454GO:0030503 | cell redox homeostasis       | 0.49 | 2   | 0.7490637  | 211   | 0.6093511  |
| 21922 | GO:0046394           | carboxylic acid biosynthe    | 0.49 | 2   | 0.7490637  | 211   | 0.6093511  |
| 5768  | GO:0008238           | exopeptidase activity        | 0.49 | 1   | 0.37453184 | 86    | 0.24836111 |
| 22376 | GO:0046873           | metal ion transmembrane      | 0.49 | 2   | 0.7490637  | 213   | 0.6151269  |
| 20624 | GO:0044430           | cytoskeletal part            | 0.49 | 1   | 0.37453184 | 88    | 0.25413695 |
| 20630 | GO:0044436           | thylakoid part               | 0.50 | 1   | 0.37453184 | 90    | 0.2599128  |
| 17617 | GO:0035251           | UDP-glucosyltransferase      | 0.50 | 2   | 0.7490637  | 218   | 0.62956655 |
| 3644  | GO:0005102           | receptor binding             | 0.51 | 1   | 0.37453184 | 91    | 0.2628007  |
| 3808  | GO:0005351GO:0005403 | sugar:hydrogen symporte      | 0.52 | 1   | 0.37453184 | 94    | 0.27146447 |
| 3835  | GO:0005402           | cation:sugar symporter ac    | 0.52 | 1   | 0.37453184 | 94    | 0.27146447 |
| 6863  | GO:0009579           | thylakoid                    | 0.52 | 1   | 0.37453184 | 94    | 0.27146447 |
| 10058 | GO:0017111           | nucleoside-triphosphatase    | 0.52 | 7   | 2.621723   | 878   | 2.5355935  |
| 3472  | GO:0004866           | endopeptidase inhibitor a    | 0.52 | 1   | 0.37453184 | 95    | 0.27435237 |
| 8159  | GO:0010951           | negative regulation of end   | 0.52 | 1   | 0.37453184 | 95    | 0.27435237 |
| 11712 | GO:0019748           | secondary metabolic prod     | 0.52 | 1   | 0.37453184 | 95    | 0.27435237 |
| 26712 | GO:0052548           | regulation of endopeptidase  | 0.52 | 1   | 0.37453184 | 95    | 0.27435237 |
| 28101 | GO:0061135           | endopeptidase regulator s    | 0.52 | 1   | 0.37453184 | 95    | 0.27435237 |
| 6796  | GO:0009507           | chloroplast                  | 0.53 | 2   | 0.7490637  | 229   | 0.6613336  |
| 13531 | GO:0031072           | heat shock protein binding   | 0.53 | 2   | 0.7490637  | 230   | 0.6642216  |
| 8677  | GO:0015295           | solute:hydrogen symporte     | 0.53 | 1   | 0.37453184 | 98    | 0.28301615 |
| 25379 | GO:0051082           | unfolded protein binding     | 0.53 | 1   | 0.37453184 | 98    | 0.28301615 |
| 4612  | GO:0006468           | protein phosphorylation      | 0.54 | 17  | 6.367041   | 2205  | 6.367063   |
| 11695 | GO:0019725           | cellular homeostasis         | 0.54 | 2   | 0.7490637  | 234   | 0.67577326 |
| 4320  | GO:0006082           | organic acid metabolic pro   | 0.54 | 3   | 1.1235955  | 369   | 1.0656425  |
| 11716 | GO:0019752           | carboxylic acid metabolic    | 0.54 | 3   | 1.1235955  | 369   | 1.0656425  |
| 19707 | GO:0043436           | oxoacid metabolic proces     | 0.54 | 3   | 1.1235955  | 369   | 1.0656425  |
| 11202 | GO:0019199           | transmembrane receptor       | 0.55 | 4   | 1.4981273  | 504   | 1.4555116  |
| 5874  | GO:0008374           | O-acyltransferase activity   | 0.55 | 1   | 0.37453184 | 102   | 0.29456782 |
| 18925 | GO:0042592           | homeostatic process          | 0.55 | 2   | 0.7490637  | 238   | 0.68732494 |
| 4405  | GO:0006195           | purine nucleotide cataboli   | 0.55 | 6   | 2.247191   | 773   | 2.232362   |
| 6508  | GO:0009143           | nucleoside triphosphate c    | 0.55 | 6   | 2.247191   | 773   | 2.232362   |
| 6509  | GO:0009144           | purine nucleoside triphos    | 0.55 | 6   | 2.247191   | 773   | 2.232362   |
| 6511  | GO:0009146           | purine nucleoside triphos    | 0.55 | 6   | 2.247191   | 773   | 2.232362   |
| 6519  | GO:0009154           | purine ribonucleotide cata   | 0.55 | 6   | 2.247191   | 773   | 2.232362   |
| 6530  | GO:0009166           | nucleotide catabolic proce   | 0.55 | 6   | 2.247191   | 773   | 2.232362   |
| 6567  | GO:0009203           | ribonucleoside triphospha    | 0.55 | 6   | 2.247191   | 773   | 2.232362   |
| 6569  | GO:0009205           | purine ribonucleoside triph  | 0.55 | 6   | 2.247191   | 773   | 2.232362   |
| 6571  | GO:0009207           | purine ribonucleoside triph  | 0.55 | 6   | 2.247191   | 773   | 2.232362   |
| 6624  | GO:0009261           | ribonucleotide catabolic p   | 0.55 | 6   | 2.247191   | 773   | 2.232362   |
| 17034 | GO:0034655           | nucleobase, nucleoside, r    | 0.55 | 6   | 2.247191   | 773   | 2.232362   |
| 17035 | GO:0034656           | nucleobase, nucleoside a     | 0.55 | 6   | 2.247191   | 773   | 2.232362   |
| 22209 | GO:0046700           | heterocycle catabolic pro    | 0.55 | 6   | 2.247191   | 773   | 2.232362   |
| 30879 | GO:0072523           | purine-containing compou     | 0.55 | 6   | 2.247191   | 773   | 2.232362   |
| 4408  | GO:0006200           | ATP catabolic process        | 0.55 | 5   | 1.8726592  | 641   | 1.8511566  |
| 9918  | GO:0016887GO:0004002 | ATPase activity              | 0.55 | 5   | 1.8726592  | 641   | 1.8511566  |
| 21600 | GO:0046034           | ATP metabolic process        | 0.55 | 5   | 1.8726592  | 641   | 1.8511566  |
| 19525 | GO:0043226           | organelle                    | 0.55 | 23  | 8.614232   | 3013  | 8.701303   |
| 19528 | GO:0043229           | intracellular organelle      | 0.55 | 23  | 8.614232   | 3013  | 8.701303   |
| 9709  | GO:0016627           | oxidoreductase activity, a   | 0.55 | 1   | 0.37453184 | 104   | 0.30034366 |
| 20520 | GO:0044270           | cellular nitrogen compou     | 0.56 | 6   | 2.247191   | 777   | 2.2439137  |
| 2668  | GO:0003779           | actin binding                | 0.56 | 1   | 0.37453184 | 105   | 0.3032316  |
| 3195  | GO:0004540           | ribonuclease activity        | 0.56 | 1   | 0.37453184 | 106   | 0.3061195  |
| 9493  | GO:0016310           | phosphorylation              | 0.56 | 19  | 7.116105   | 2504  | 7.2313514  |
| 6824  | GO:0009536           | plastid                      | 0.57 | 2   | 0.7490637  | 247   | 0.7133162  |
| 6563  | GO:0009199           | ribonucleoside triphospha    | 0.57 | 6   | 2.247191   | 790   | 2.2814567  |
| 6515  | GO:0009150           | purine ribonucleotide met    | 0.57 | 6   | 2.247191   | 791   | 2.2843447  |
| 7690  | GO:0010466           | negative regulation of pep   | 0.57 | 1   | 0.37453184 | 110   | 0.31767118 |
| 12946 | GO:0030414           | peptidase inhibitor activity | 0.57 | 1   | 0.37453184 | 110   | 0.31767118 |
| 25636 | GO:0051346           | negative regulation of hvd   | 0.57 | 1   | 0.37453184 | 110   | 0.31767118 |
| 6506  | GO:0009141           | nucleoside triphosphate n    | 0.58 | 6   | 2.247191   | 796   | 2.2987843  |
| 3304  | GO:0004672GO:0050222 | protein kinase activity      | 0.58 | 10  | 3.7453184  | 1333  | 3.8495972  |
| 26711 | GO:0052547           | regulation of peptidase ac   | 0.58 | 1   | 0.37453184 | 112   | 0.32344702 |
| 28100 | GO:0061134           | peptidase regulator activ    | 0.58 | 1   | 0.37453184 | 112   | 0.32344702 |
| 4850  | GO:0006732GO:0006754 | coenzyme metabolic proc      | 0.58 | 1   | 0.37453184 | 113   | 0.32633495 |



|       |                      |                             |      |    |            |      |            |
|-------|----------------------|-----------------------------|------|----|------------|------|------------|
| 9535  | GO:0016407           | acetyltransferase activity  | 0.59 | 1  | 0.37453184 | 115  | 0.3321108  |
| 4373  | GO:0006163           | purine nucleotide metabo    | 0.60 | 6  | 2.247191   | 810  | 2.339215   |
| 26845 | GO:0052689           | carboxylic ester hydrolase  | 0.60 | 4  | 1.4981273  | 538  | 1.5537009  |
| 6622  | GO:0009259 GO:000912 | ribonucleotide metabolic p  | 0.60 | 6  | 2.247191   | 812  | 2.344991   |
| 9285  | GO:0016043           | cellular component organi   | 0.60 | 2  | 0.7490637  | 261  | 0.7537471  |
| 25416 | GO:0051119           | sugar transmembrane tra     | 0.60 | 1  | 0.37453184 | 118  | 0.34077454 |
| 9824  | GO:0016773           | phosphotransferase activ    | 0.60 | 11 | 4.11985    | 1493 | 4.311664   |
| 9579  | GO:0016462           | pyrophosphatase activity    | 0.61 | 7  | 2.621723   | 954  | 2.7550755  |
| 9859  | GO:0016818           | hydrolase activity, acting  | 0.61 | 7  | 2.621723   | 956  | 2.7608514  |
| 19126 | GO:0042803           | protein homodimerization    | 0.61 | 2  | 0.7490637  | 265  | 0.7652988  |
| 22007 | GO:0046483           | heterocycle metabolic pro   | 0.61 | 8  | 2.9962547  | 1094 | 3.1593843  |
| 9858  | GO:0016817           | hydrolase activity, acting  | 0.61 | 7  | 2.621723   | 959  | 2.769515   |
| 6884  | GO:0009607           | response to biotic stimuli  | 0.61 | 1  | 0.37453184 | 122  | 0.3523262  |
| 30877 | GO:0072521           | purine-containing compou    | 0.62 | 6  | 2.247191   | 827  | 2.3883097  |
| 22049 | GO:0046527           | glucosyltransferase activi  | 0.62 | 2  | 0.7490637  | 270  | 0.77973837 |
| 4121  | GO:0005856           | cytoskeleton                | 0.62 | 1  | 0.37453184 | 126  | 0.3638779  |
| 19125 | GO:0042802           | identical protein binding   | 0.63 | 5  | 1.8726592  | 697  | 2.01288    |
| 4649  | GO:0006520 GO:000651 | cellular amino acid metab   | 0.63 | 2  | 0.7490637  | 277  | 0.7998538  |
| 9823  | GO:0016772           | transferase activity, trans | 0.63 | 14 | 5.243446   | 1932 | 5.579461   |
| 3874  | GO:0005509           | calcium ion binding         | 0.64 | 2  | 0.7490637  | 279  | 0.8057296  |
| 2758  | GO:0003924           | GTPase activity             | 0.64 | 1  | 0.37453184 | 132  | 0.3812054  |
| 4394  | GO:0006184           | GTP catabolic process       | 0.64 | 1  | 0.37453184 | 132  | 0.3812054  |
| 21605 | GO:0046039           | GTP metabolic process       | 0.64 | 1  | 0.37453184 | 132  | 0.3812054  |
| 4215  | GO:0005975           | carbohydrate metabolic p    | 0.64 | 7  | 2.621723   | 990  | 2.8590407  |
| 3490  | GO:0004888 GO:000492 | transmembrane receptor      | 0.64 | 4  | 1.4981273  | 571  | 1.6490022  |
| 20532 | GO:0044282           | small molecule catabolic    | 0.65 | 6  | 2.247191   | 854  | 2.4662836  |
| 30205 | GO:0071841           | cellular component organi   | 0.65 | 2  | 0.7490637  | 285  | 0.8230572  |
| 9811  | GO:0016757 GO:001693 | transferase activity, trans | 0.66 | 5  | 1.8726592  | 729  | 2.1052935  |
| 6046  | GO:0008610           | lipid biosynthetic process  | 0.67 | 1  | 0.37453184 | 141  | 0.4071967  |
| 8676  | GO:0015294           | solute:cation symporter at  | 0.67 | 1  | 0.37453184 | 141  | 0.4071967  |
| 8557  | GO:0015144           | carbohydrate transmembr     | 0.67 | 1  | 0.37453184 | 143  | 0.41297254 |
| 16602 | GO:0034219           | carbohydrate transmembr     | 0.67 | 1  | 0.37453184 | 143  | 0.41297254 |
| 3873  | GO:0005507           | copper ion binding          | 0.68 | 1  | 0.37453184 | 146  | 0.42163628 |
| 20356 | GO:0044106           | cellular amine metabolic p  | 0.68 | 2  | 0.7490637  | 303  | 0.8750397  |
| 6071  | GO:0008643 GO:000686 | carbohydrate transport      | 0.68 | 1  | 0.37453184 | 147  | 0.42452422 |
| 20517 | GO:0044267           | cellular protein metabolic  | 0.68 | 23 | 8.614232   | 3225 | 9.313541   |
| 9801  | GO:0016747           | transferase activity, trans | 0.69 | 3  | 1.1235955  | 456  | 1.3168914  |
| 11426 | GO:0019438           | aromatic compound biosy     | 0.69 | 1  | 0.37453184 | 149  | 0.43030006 |
| 20498 | GO:0044248           | cellular catabolic process  | 0.69 | 6  | 2.247191   | 894  | 2.5818002  |
| 9488  | GO:0016301           | kinase activity             | 0.69 | 12 | 4.494382   | 1740 | 5.0249805  |
| 3200  | GO:0004553 GO:001680 | hydrolase activity, hydroly | 0.70 | 2  | 0.7490637  | 312  | 0.90103096 |
| 5791  | GO:0008270           | zinc ion binding            | 0.70 | 13 | 4.8689137  | 1880 | 5.4292893  |
| 8517  | GO:0015103           | inorganic anion transmem    | 0.70 | 1  | 0.37453184 | 154  | 0.44473964 |
| 11224 | GO:0019222           | regulation of metabolic pr  | 0.70 | 22 | 8.2397     | 3115 | 8.995871   |
| 6662  | GO:0009306           | amine metabolic process     | 0.70 | 2  | 0.7490637  | 314  | 0.9068066  |
| 13656 | GO:0031224           | intrinsic to membrane       | 0.70 | 8  | 2.9962547  | 1193 | 3.4452884  |
| 2975  | GO:0004175 GO:001680 | endopeptidase activity      | 0.71 | 2  | 0.7490637  | 320  | 0.9241344  |
| 4867  | GO:0006753           | nucleoside phosphate me     | 0.71 | 6  | 2.247191   | 914  | 2.6395588  |
| 6484  | GO:0009117           | nucleotide metabolic proc   | 0.71 | 6  | 2.247191   | 914  | 2.6395588  |
| 5732  | GO:0008194           | UDP-glycosyltransferase     | 0.71 | 2  | 0.7490637  | 322  | 0.9299102  |
| 18582 | GO:0042221           | response to chemical stim   | 0.72 | 2  | 0.7490637  | 328  | 0.94723773 |
| 12572 | GO:0022890 GO:001508 | inorganic cation transmem   | 0.73 | 2  | 0.7490637  | 332  | 0.9587894  |
| 12516 | GO:0022804           | active transmembrane tra    | 0.73 | 5  | 1.8726592  | 787  | 2.2727928  |
| 20618 | GO:0044424           | intracellular part          | 0.73 | 27 | 10.11236   | 3853 | 11.127155  |
| 6077  | GO:0008652           | cellular amino acid biosyn  | 0.73 | 1  | 0.37453184 | 169  | 0.48805845 |
| 26932 | GO:0055086           | nucleobase, nucleoside a    | 0.74 | 6  | 2.247191   | 944  | 2.7261963  |
| 9800  | GO:0016746           | transferase activity, trans | 0.74 | 3  | 1.1235955  | 498  | 1.438184   |
| 4067  | GO:0005783           | endoplasmic reticulum       | 0.74 | 1  | 0.37453184 | 174  | 0.50249803 |
| 20619 | GO:0044425           | membrane part               | 0.74 | 10 | 3.7453184  | 1523 | 4.398302   |
| 8967  | GO:0015698           | inorganic anion transport   | 0.74 | 1  | 0.37453184 | 176  | 0.5082739  |
| 20533 | GO:0044283           | small molecule biosynthe    | 0.75 | 2  | 0.7490637  | 347  | 1.0021082  |
| 6166  | GO:0008757           | S-adenosylmethionine-de     | 0.75 | 1  | 0.37453184 | 180  | 0.5198256  |
| 5195  | GO:0007165 GO:002303 | signal transduction         | 0.75 | 6  | 2.247191   | 961  | 2.775291   |
| 12602 | GO:0023052 GO:002304 | signaling                   | 0.75 | 6  | 2.247191   | 961  | 2.775291   |
| 6663  | GO:0009309           | amine biosynthetic proces   | 0.75 | 1  | 0.37453184 | 181  | 0.5227135  |
| 9818  | GO:0016765 GO:001676 | transferase activity, trans | 0.76 | 1  | 0.37453184 | 185  | 0.53426516 |
| 22479 | GO:0046983           | protein dimerization activi | 0.76 | 3  | 1.1235955  | 517  | 1.4930545  |
| 3476  | GO:0004872 GO:001904 | receptor activity           | 0.76 | 4  | 1.4981273  | 672  | 1.9406822  |
| 2657  | GO:0003727 GO:000372 | single-stranded RNA bind    | 0.77 | 1  | 0.37453184 | 188  | 0.54292893 |
| 30204 | GO:0071840           | cellular component organi   | 0.77 | 2  | 0.7490637  | 362  | 1.045427   |
| 30066 | GO:0071702           | organic substance transp    | 0.78 | 3  | 1.1235955  | 529  | 1.5277096  |
| 20521 | GO:0044271           | cellular nitrogen compou    | 0.78 | 2  | 0.7490637  | 367  | 1.0598665  |
| 31465 | GO:0080090           | regulation of primary meta  | 0.78 | 18 | 6.741573   | 2710 | 7.826263   |
| 28378 | GO:0070011           | peptidase activity, acting  | 0.79 | 3  | 1.1235955  | 537  | 1.550813   |
| 12608 | GO:0030001           | metal ion transport         | 0.79 | 2  | 0.7490637  | 374  | 1.080082   |
| 5840  | GO:0008324           | cation transmembrane tra    | 0.79 | 3  | 1.1235955  | 538  | 1.5537009  |
| 10244 | GO:0018130           | heterocycle biosynthetic p  | 0.79 | 1  | 0.37453184 | 199  | 0.57469606 |
| 9836  | GO:0016787           | hydrolase activity          | 0.80 | 25 | 9.363296   | 3723 | 10.751725  |
| 8943  | GO:0015672           | monovalent inorganic cati   | 0.80 | 2  | 0.7490637  | 383  | 1.1060733  |
| 9266  | GO:0016020           | membrane                    | 0.80 | 25 | 9.363296   | 3741 | 10.803708  |
| 13753 | GO:0031323           | regulation of cellular meta | 0.81 | 18 | 6.741573   | 2770 | 7.999538   |
| 5766  | GO:0008236           | serine-type peptidase acti  | 0.81 | 1  | 0.37453184 | 214  | 0.6180149  |
| 8495  | GO:0015077           | monovalent inorganic cati   | 0.81 | 1  | 0.37453184 | 214  | 0.6180149  |
| 25094 | GO:0050799 GO:005079 | regulation of biological pr | 0.81 | 29 | 10.8614235 | 4315 | 12.461374  |
| 4609  | GO:0006464           | protein modification proc   | 0.81 | 18 | 6.741573   | 2781 | 8.031305   |
| 15436 | GO:0033036           | macromolecule localizati    | 0.81 | 2  | 0.7490637  | 397  | 1.1465042  |
| 5763  | GO:0008233           | peptidase activity          | 0.81 | 3  | 1.1235955  | 565  | 1.6316746  |
| 9845  | GO:0016798           | hydrolase activity, acting  | 0.82 | 2  | 0.7490637  | 401  | 1.1580559  |
| 4558  | GO:0006396 GO:000639 | RNA processing              | 0.82 | 1  | 0.37453184 | 219  | 0.63245445 |
| 20531 | GO:0044281           | small molecule metabolic    | 0.82 | 11 | 4.11985    | 1788 | 5.1636004  |
| 10103 | GO:0017171           | serine hydrolase activity   | 0.82 | 1  | 0.37453184 | 220  | 0.63534236 |
| 6425  | GO:0009056           | catabolic process           | 0.82 | 6  | 2.247191   | 1051 | 3.0352037  |
| 8673  | GO:0015291 GO:001529 | secondary active transme    | 0.82 | 2  | 0.7490637  | 407  | 1.1753833  |
| 11221 | GO:0019219           | regulation of nucleobase,   | 0.83 | 17 | 6.367041   | 2675 | 7.7251854  |
| 25468 | GO:0051171           | regulation of nitrogen com  | 0.83 | 17 | 6.367041   | 2675 | 7.7251854  |
| 4990  | GO:0006915 GO:000863 | apoptosis                   | 0.83 | 1  | 0.37453184 | 227  | 0.6555578  |
| 28364 | GO:00065007          | biological regulation       | 0.83 | 29 | 10.8614235 | 4376 | 12.637537  |
| 4755  | GO:0006629           | lipid metabolic process     | 0.84 | 3  | 1.1235955  | 590  | 1.7038727  |
| 9906  | GO:0016874           | ligase activity             | 0.84 | 3  | 1.1235955  | 597  | 1.7240882  |
| 11828 | GO:0019899           | enzyme binding              | 0.84 | 1  | 0.37453184 | 237  | 0.684437   |
| 5756  | GO:0008219           | cell death                  | 0.84 | 1  | 0.37453184 | 239  | 0.69021285 |
| 8209  | GO:0012501 GO:001624 | programmed cell death       | 0.84 | 1  | 0.37453184 | 239  | 0.69021285 |
| 9462  | GO:0016265           | death                       | 0.84 | 1  | 0.37453184 | 239  | 0.69021285 |
| 25098 | GO:0050794 GO:005124 | regulation of cellular proc | 0.84 | 26 | 9.737827   | 3987 | 11.514136  |
| 11522 | GO:0019538 GO:000641 | protein metabolic process   | 0.85 | 27 | 10.11236   | 4134 | 11.938661  |
| 5712  | GO:0008168 GO:000448 | methyltransferase activity  | 0.85 | 1  | 0.37453184 | 244  | 0.7046524  |
| 5981  | GO:0008509           | anion transmembrane tra     | 0.85 | 1  | 0.37453184 | 245  | 0.70754033 |
| 4917  | GO:0006820 GO:000682 | anion transport             | 0.85 | 1  | 0.37453184 | 247  | 0.7133162  |
| 5661  | GO:0008092           | cytoskeletal protein bindi  | 0.86 | 1  | 0.37453184 | 249  | 0.719092   |
| 12805 | GO:0030246           | carbohydrate binding        | 0.86 | 1  | 0.37453184 | 251  | 0.7248679  |
| 3475  | GO:0004871 GO:000506 | signal transducer activity  | 0.86 | 4  | 1.4981273  | 787  | 2.2727928  |
| 27063 | GO:0060089           | molecular transducer acti   | 0.86 | 4  | 1.4981273  | 787  | 2.2727928  |
| 19684 | GO:0043412           | macromolecule modificati    | 0.86 | 18 | 6.741573   | 2900 | 8.374968   |

|       |                       |                              |      |     |            |       |            |
|-------|-----------------------|------------------------------|------|-----|------------|-------|------------|
| 9795  | GO:0016740            | transferase activity         | 0.86 | 24  | 8.988764   | 3764  | 10.870131  |
| 9796  | GO:0016741            | transferase activity, transf | 0.87 | 1   | 0.37453184 | 261   | 0.7537471  |
| 25998 | GO:0051716            | cellular response to stimu   | 0.88 | 6   | 2.247191   | 1138  | 3.2864528  |
| 8494  | GO:0015075            | ion transmembrane transp     | 0.88 | 4   | 1.4981273  | 827   | 2.3883097  |
| 16603 | GO:0034220            | ion transmembrane transp     | 0.89 | 4   | 1.4981273  | 833   | 2.4056373  |
| 4911  | GO:0006812 GO:0006819 | cation transport             | 0.89 | 3   | 1.1235955  | 662   | 1.9118029  |
| 14667 | GO:0032259            | methylation                  | 0.89 | 1   | 0.37453184 | 285   | 0.8230572  |
| 4916  | GO:0006818            | hydrogen transport           | 0.90 | 1   | 0.37453184 | 292   | 0.84327257 |
| 9246  | GO:0015992            | proton transport             | 0.90 | 1   | 0.37453184 | 292   | 0.84327257 |
| 9812  | GO:0016758            | transferase activity, trans  | 0.90 | 2   | 0.7490637  | 501   | 1.4468478  |
| 22415 | GO:0046914            | transition metal ion bindin  | 0.91 | 15  | 5.6179776  | 2599  | 7.5057034  |
| 7141  | GO:0009889            | regulation of biosynthetic   | 0.91 | 15  | 5.6179776  | 2605  | 7.523031   |
| 7772  | GO:0010556            | regulation of macromolec     | 0.91 | 15  | 5.6179776  | 2605  | 7.523031   |
| 13756 | GO:0031326            | regulation of cellular bios  | 0.91 | 15  | 5.6179776  | 2605  | 7.523031   |
| 32213 | GO:2000112            | regulation of cellular mac   | 0.91 | 15  | 5.6179776  | 2605  | 7.523031   |
| 20640 | GO:0044446            | intracellular organelle par  | 0.91 | 3   | 1.1235955  | 710   | 2.0504231  |
| 20616 | GO:0044422            | organelle part               | 0.91 | 3   | 1.1235955  | 712   | 2.0561988  |
| 7692  | GO:0010468            | regulation of gene expres    | 0.92 | 15  | 5.6179776  | 2635  | 7.6096687  |
| 4849  | GO:0006730 GO:0019753 | one-carbon metabolic pro     | 0.92 | 1   | 0.37453184 | 325   | 0.93857396 |
| 3449  | GO:0004842 GO:0004844 | ubiquitin-protein ligase ac  | 0.92 | 1   | 0.37453184 | 326   | 0.94146186 |
| 27228 | GO:0060255            | regulation of macromolec     | 0.92 | 15  | 5.6179776  | 2660  | 7.6818666  |
| 5909  | GO:0008415            | acyltransferase activity     | 0.92 | 1   | 0.37453184 | 330   | 0.95301354 |
| 2643  | GO:0003700 GO:0001330 | sequence-specific DNA b      | 0.92 | 7   | 2.621723   | 1417  | 4.0921826  |
| 716   | GO:0001071            | nucleic acid binding trans   | 0.92 | 7   | 2.621723   | 1417  | 4.0921826  |
| 9654  | GO:0016567            | protein ubiquitination       | 0.92 | 1   | 0.37453184 | 332   | 0.9587894  |
| 14854 | GO:0032446            | protein modification by sn   | 0.92 | 1   | 0.37453184 | 332   | 0.9587894  |
| 29011 | GO:0070647            | protein modification by sn   | 0.92 | 1   | 0.37453184 | 332   | 0.9587894  |
| 3903  | GO:0005575 GO:0008372 | cellular component           | 0.93 | 56  | 20.973783  | 8515  | 24.590637  |
| 22375 | GO:0046872            | metal ion binding            | 0.93 | 17  | 6.367041   | 2985  | 8.6204405  |
| 11747 | GO:0019787 GO:0008639 | small conjugating protein    | 0.93 | 1   | 0.37453184 | 339   | 0.9790048  |
| 9267  | GO:0016021            | integral to membrane         | 0.93 | 5   | 1.8726592  | 1103  | 3.1853757  |
| 19470 | GO:0043167            | ion binding                  | 0.93 | 17  | 6.367041   | 2997  | 8.655096   |
| 19472 | GO:0043169            | cation binding               | 0.93 | 17  | 6.367041   | 2997  | 8.655096   |
| 2674  | GO:0003824            | catalytic activity           | 0.94 | 72  | 26.966291  | 10750 | 31.045137  |
| 3178  | GO:0004519            | endonuclease activity        | 0.94 | 1   | 0.37453184 | 356   | 1.0280994  |
| 4910  | GO:0006811            | ion transport                | 0.94 | 4   | 1.4981273  | 959   | 2.769515   |
| 4530  | GO:0006355 GO:0032583 | regulation of transcription  | 0.94 | 14  | 5.243446   | 2591  | 7.4826     |
| 25544 | GO:0051252            | regulation of RNA metabo     | 0.94 | 14  | 5.243446   | 2593  | 7.488376   |
| 4641  | GO:0006508            | proteolysis                  | 0.94 | 4   | 1.4981273  | 965   | 2.7868426  |
| 12547 | GO:0022857 GO:0005388 | transmembrane transport      | 0.94 | 7   | 2.621723   | 1483  | 4.282785   |
| 22409 | GO:0046906            | tetrapyrrole binding         | 0.95 | 2   | 0.7490637  | 596   | 1.7212002  |
| 3723  | GO:0005215 GO:0005478 | transporter activity         | 0.95 | 9   | 3.3707864  | 1844  | 5.325324   |
| 9913  | GO:0016881            | acid-amino acid ligase ac    | 0.95 | 1   | 0.37453184 | 391   | 1.1291766  |
| 3945  | GO:0005622            | intracellular                | 0.95 | 28  | 10.486892  | 4751  | 13.720507  |
| 26931 | GO:0055085            | transmembrane transport      | 0.96 | 7   | 2.621723   | 1548  | 4.4705     |
| 25195 | GO:0050896 GO:0051869 | response to stimulus         | 0.96 | 9   | 3.3707864  | 1881  | 5.432177   |
| 3946  | GO:0005623            | cell                         | 0.96 | 52  | 19.475655  | 8227  | 23.758917  |
| 20657 | GO:0044464            | cell part                    | 0.96 | 52  | 19.475655  | 8227  | 23.758917  |
| 19533 | GO:0043234            | protein complex              | 0.96 | 3   | 1.1235955  | 848   | 2.448956   |
| 3177  | GO:0004518            | nuclease activity            | 0.96 | 1   | 0.37453184 | 427   | 1.2331418  |
| 12574 | GO:0022892            | substrate-specific transp    | 0.97 | 6   | 2.247191   | 1463  | 4.2250266  |
| 9911  | GO:0016879            | ligase activity, forming ca  | 0.97 | 1   | 0.37453184 | 456   | 1.3168914  |
| 4909  | GO:0006810 GO:0015453 | transport                    | 0.97 | 11  | 4.11985    | 2315  | 6.6855345  |
| 25529 | GO:0051234            | establishment of localizat   | 0.97 | 11  | 4.11985    | 2315  | 6.6855345  |
| 25476 | GO:0051179            | localization                 | 0.97 | 11  | 4.11985    | 2319  | 6.697086   |
| 3863  | GO:0005488            | binding                      | 0.98 | 92  | 34.45693   | 13903 | 40.15075   |
| 9869  | GO:0016829            | lyase activity               | 0.98 | 1   | 0.37453184 | 488   | 1.4093049  |
| 11931 | GO:0020037            | heme binding                 | 0.99 | 1   | 0.37453184 | 550   | 1.5883559  |
| 3955  | GO:0005634            | nucleus                      | 0.99 | 5   | 1.8726592  | 1433  | 4.138389   |
| 12573 | GO:0022891            | substrate-specific transm    | 0.99 | 4   | 1.4981273  | 1241  | 3.5839086  |
| 3872  | GO:0005506            | iron ion binding             | 0.99 | 1   | 0.37453184 | 563   | 1.6258988  |
| 19526 | GO:0043227            | membrane-bounded orga        | 0.99 | 8   | 2.9962547  | 2142  | 6.185924   |
| 19530 | GO:0043231            | intracellular membrane-b     | 0.99 | 8   | 2.9962547  | 2142  | 6.185924   |
| 3876  | GO:0005515 GO:0045308 | protein binding              | 1.00 | 34  | 12.734082  | 6933  | 20.021948  |
| 2626  | GO:0003674 GO:0005554 | molecular_function           | 1.00 | 157 | 58.8015    | 24394 | 70.447914  |
